# Supplementary material for: Structures of RecBCD in complex with phage-encoded inhibitor proteins reveal distinctive strategies for evasion of a bacterial immunity hub
Source: eLife journal article supplement (doi:10.7554/elife.83409), 2022-12-19
Supplement: supp [file DNA unwinding assay fSSB tagged gp5.9 RAW DATA.xlsx]

## Sheet: Repeat 1
his-gp5.9:	Control		2nM		5nM		10nM		20nM		50nM		100nM		500nM
	Time (s)	Fluoro	Time (s)	Fluoro	Time (s)	Fluoro	Time (s)	Fluoro	Time (s)	Fluoro	Time (s)	Fluoro	Time (s)	Fluoro	Time (s)	Fluoro
	0.5	91.3388	0.5	78.5766	0.5	81.1509	0.5	81.7415	0.5	73.829	0.5	81.3762	0.5	83.2076	0.5	81.804
	1.5	92.1611	1.5	79.4093	1.5	81.1384	1.5	81.854	1.5	74.5961	1.5	82.3833	1.5	84.4504	1.5	83.4312
	2.5	93.1511	2.5	80.2259	2.5	81.8179	2.5	82.3258	2.5	75.9386	2.5	83.1883	2.5	84.9503	2.5	83.1778
	3.5	93.0103	3.5	80.2868	3.5	80.5193	3.5	82.2922	3.5	74.595	3.5	81.9363	3.5	84.2037	3.5	83.0398
	4.5	92.5865	4.5	80.1205	4.5	81.4106	4.5	82.4178	4.5	74.1619	4.5	82.4574	4.5	83.9664	4.5	82.6892
	5.5	92.7022	5.5	80.2948	5.5	82.3625	5.5	81.5387	5.5	75.1598	5.5	83.0522	5.5	84.7918	5.5	82.3536
	6.5	91.7561	6.5	79.5704	6.5	79.7636	6.5	83.0362	6.5	74.6675	6.5	82.3758	6.5	83.3697	6.5	82.3699
	7.5	93.1006	7.5	80.3362	7.5	79.6668	7.5	81.8012	7.5	74.6965	7.5	82.7959	7.5	83.1373	7.5	82.3382
	8.5	93.3248	8.5	79.3873	8.5	80.1511	8.5	81.3517	8.5	74.2541	8.5	81.5319	8.5	84.2588	8.5	82.7924
	9.5	92.8355	9.5	79.3948	9.5	80.599	9.5	82.247	9.5	74.7921	9.5	82.573	9.5	83.5814	9.5	82.3599
	10.5	92.3325	10.5	79.8613	10.5	80.6848	10.5	82.1138	10.5	74.8684	10.5	82.6716	10.5	84.4864	10.5	82.4542
	11.5	91.8865	11.5	79.2687	11.5	80.9008	11.5	82.7351	11.5	75.3088	11.5	81.905	11.5	84.3199	11.5	82.2488
	12.5	92.6188	12.5	80.259	12.5	80.5195	12.5	81.9773	12.5	74.5638	12.5	82.47	12.5	84.7016	12.5	82.5163
	13.5	91.5759	13.5	79.2883	13.5	79.9549	13.5	82.2678	13.5	74.4075	13.5	82.7155	13.5	85.1729	13.5	81.5947
	14.5	92.602	14.5	79.4602	14.5	81.0435	14.5	82.8962	14.5	75.1124	14.5	81.9483	14.5	84.139	14.5	82.5255
	15.5	92.6687	15.5	79.5656	15.5	80.2971	15.5	81.5579	15.5	74.2346	15.5	82.2913	15.5	84.1165	15.5	83.2273
	16.5	92.9761	16.5	80.002	16.5	80.6709	16.5	81.6992	16.5	75.09	16.5	82.9468	16.5	84.3704	16.5	82.0764
	17.5	92.3761	17.5	80.3123	17.5	80.258	17.5	81.7027	17.5	74.2566	17.5	81.0071	17.5	84.2796	17.5	83.6965
	18.5	91.5448	18.5	79.8108	18.5	80.1726	18.5	81.7333	18.5	74.8131	18.5	82.65	18.5	84.228	18.5	83.9506
	19.5	92.1248	19.5	79.4611	19.5	79.9339	19.5	81.8901	19.5	74.0747	19.5	83.2803	19.5	83.6927	19.5	83.1469
	20.5	92.253	20.5	81.4648	20.5	80.6916	20.5	81.8266	20.5	74.9848	20.5	82.5433	20.5	84.7512	20.5	83.4868
	21.5	92.7118	21.5	78.5949	21.5	80.3256	21.5	81.8616	21.5	74.1766	21.5	82.1885	21.5	84.2793	21.5	83.6266
	22.5	92.7006	22.5	79.046	22.5	80.9936	22.5	82.1993	22.5	74.5931	22.5	82.895	22.5	84.2603	22.5	82.5058
	23.5	92.499	23.5	78.958	23.5	80.8499	23.5	81.049	23.5	74.5266	23.5	82.7203	23.5	84.3078	23.5	82.4235
	24.5	92.8138	24.5	79.6927	24.5	80.2194	24.5	81.758	24.5	74.9121	24.5	81.7351	24.5	84.3331	24.5	82.3319
	25.5	92.3039	25.5	80.1639	25.5	80.2373	25.5	81.0832	25.5	74.9856	25.5	81.9001	25.5	84.1692	25.5	82.4422
	26.5	92.4731	26.5	79.606	26.5	80.3479	26.5	81.7702	26.5	74.1063	26.5	82.3765	26.5	83.9204	26.5	82.4446
	27.5	92.4252	27.5	80.0636	27.5	80.4825	27.5	82.3095	27.5	74.6933	27.5	82.6384	27.5	83.1898	27.5	82.8812
	28.5	91.4613	28.5	79.6059	28.5	79.6477	28.5	81.7668	28.5	74.2388	28.5	81.9963	28.5	84.13	28.5	82.526
	29.5	92.6289	29.5	80.0258	29.5	80.2027	29.5	81.3937	29.5	74.8762	29.5	82.4306	29.5	84.1325	29.5	82.021
	30.5	92.693	30.5	79.7592	30.5	79.8671	30.5	82.4793	30.5	74.6346	30.5	82.4784	30.5	83.4694	30.5	82.1636
	31.5	92.7236	31.5	80.8149	31.5	80.4171	31.5	82.2564	31.5	74.3232	31.5	82.6501	31.5	83.8989	31.5	82.4215
	32.5	92.5873	32.5	79.409	32.5	80.1133	32.5	81.5941	32.5	74.7001	32.5	81.3803	32.5	83.5258	32.5	82.0342
	33.5	91.6055	33.5	81.0837	33.5	80.2243	33.5	81.1752	33.5	74.7895	33.5	81.7068	33.5	83.5555	33.5	82.6489
	34.5	92.9422	34.5	79.0635	34.5	80.0786	34.5	81.8131	34.5	74.9609	34.5	82.4136	34.5	84.9865	34.5	82.7795
	35.5	92.6591	35.5	79.5603	35.5	80.3415	35.5	81.7004	35.5	74.7007	35.5	81.3232	35.5	84.0494	35.5	81.8749
	36.5	92.4121	36.5	80.1879	36.5	80.7823	36.5	81.8264	36.5	74.8246	36.5	81.9262	36.5	83.8139	36.5	82.8478
	37.5	92.3193	37.5	80.0609	37.5	80.0943	37.5	82.5953	37.5	74.6254	37.5	81.778	37.5	84.2758	37.5	82.2582
	38.5	92.5304	38.5	79.6002	38.5	80.4468	38.5	82.3639	38.5	74.4723	38.5	82.5911	38.5	84.7747	38.5	82.5547
	39.5	91.648	39.5	79.4712	39.5	79.7836	39.5	81.6916	39.5	74.5809	39.5	82.6009	39.5	83.829	39.5	81.976
	40.5	92.4408	40.5	79.1902	40.5	80.0142	40.5	81.5645	40.5	75.175	40.5	82.4217	40.5	83.4574	40.5	82.8947
	41.5	91.827	41.5	79.9753	41.5	79.7798	41.5	81.8531	41.5	73.4232	41.5	81.8028	41.5	83.9129	41.5	82.0664
	42.5	92.4385	42.5	79.7585	42.5	80.7429	42.5	82.7632	42.5	74.9639	42.5	82.5007	42.5	84.2283	42.5	81.776
	43.5	91.8313	43.5	80.4844	43.5	80.2054	43.5	81.528	43.5	74.5419	43.5	82.6783	43.5	84.4096	43.5	81.9628
	44.5	91.8388	44.5	79.3636	44.5	79.4224	44.5	81.8003	44.5	74.663	44.5	82.1959	44.5	83.8949	44.5	82.331
	45.5	93.8283	45.5	79.3353	45.5	79.6432	45.5	81.9767	45.5	74.7619	45.5	82.7692	45.5	84.4828	45.5	81.6352
	46.5	91.6175	46.5	80.079	46.5	79.3185	46.5	81.4394	46.5	75.5472	46.5	81.6414	46.5	82.5503	46.5	82.6211
	47.5	91.967	47.5	80.1251	47.5	78.9566	47.5	81.5625	47.5	74.4746	47.5	82.0558	47.5	84.428	47.5	82.5355
	48.5	92.7134	48.5	80.2099	48.5	79.8992	48.5	82.6973	48.5	74.2222	48.5	82.8836	48.5	83.8271	48.5	83.0033
	49.5	92.5048	49.5	79.6754	49.5	80.1416	49.5	82.4727	49.5	75.6932	49.5	81.5558	49.5	84.756	49.5	82.966
	50.5	92.916	50.5	79.1967	50.5	80.1224	50.5	82.21	50.5	74.7941	50.5	82.1095	50.5	83.4539	50.5	81.7601
	51.5	92.7172	51.5	79.3124	51.5	79.5923	51.5	82.1869	51.5	73.7146	51.5	81.6193	51.5	84.9768	51.5	82.4447
	52.5	92.0199	52.5	79.1425	52.5	79.9562	52.5	81.9329	52.5	74.7631	52.5	81.3488	52.5	84.3452	52.5	83.2704
	53.5	92.5651	53.5	79.3688	53.5	80.2754	53.5	81.3322	53.5	74.3958	53.5	83.2665	53.5	83.4112	53.5	82.6196
	54.5	92.754	54.5	79.8159	54.5	79.6669	54.5	82.2741	54.5	74.3857	54.5	82.3136	54.5	83.7101	54.5	82.4106
	55.5	91.9212	55.5	80.0009	55.5	80.0274	55.5	82.5181	55.5	73.8607	55.5	82.6183	55.5	83.7385	55.5	82.8033
	56.5	91.8858	56.5	80.2333	56.5	79.7801	56.5	81.4966	56.5	75.4602	56.5	82.9641	56.5	84.406	56.5	82.7831
	57.5	92.6593	57.5	79.9564	57.5	80.1203	57.5	81.8101	57.5	74.68	57.5	82.3098	57.5	83.5817	57.5	81.9162
	58.5	93.0405	58.5	79.2722	58.5	80.3494	58.5	81.8644	58.5	74.8322	58.5	82.919	58.5	83.5586	58.5	81.8417
	59.5	91.9158	59.5	80.1806	59.5	80.1177	59.5	81.5418	59.5	74.7584	59.5	82.4751	59.5	83.9631	59.5	82.9676
	60.5	93.0817	60.5	79.6422	60.5	79.9002	60.5	81.5169	60.5	73.8024	60.5	82.5083	60.5	84.4393	60.5	82.5879
	61.5	91.5836	61.5	79.7448	61.5	80.649	61.5	81.6702	61.5	75.1586	61.5	82.062	61.5	83.3366	61.5	82.7224
	62.5	92.4363	62.5	79.4869	62.5	80.3554	62.5	80.7008	62.5	74.45	62.5	82.6226	62.5	83.5208	62.5	81.5046
	63.5	92.0329	63.5	79.9121	63.5	80.4631	63.5	82.6324	63.5	75.4142	63.5	82.0676	63.5	84.3305	63.5	82.3619
	64.5	92.4045	64.5	79.7831	64.5	80.7727	64.5	82.0914	64.5	75.8404	64.5	82.3537	64.5	83.8146	64.5	82.7929
	65.5	91.9639	65.5	79.6981	65.5	80.4911	65.5	81.565	65.5	74.9121	65.5	82.4294	65.5	84.2029	65.5	82.2764
	66.5	92.2172	66.5	79.997	66.5	80.0666	66.5	82.2333	66.5	74.3835	66.5	82.0257	66.5	83.4391	66.5	83.1716
	67.5	91.7891	67.5	80.729	67.5	80.3358	67.5	81.6213	67.5	74.678	67.5	82.5364	67.5	84.3102	67.5	82.8744
	68.5	93.5017	68.5	80.1825	68.5	79.7755	68.5	81.1725	68.5	75.263	68.5	81.7799	68.5	84.3183	68.5	82.5088
	69.5	92.2309	69.5	79.5767	69.5	79.8063	69.5	81.5435	69.5	74.5253	69.5	82.2111	69.5	84.2563	69.5	82.8696
	70.5	91.9927	70.5	79.8114	70.5	80.2502	70.5	81.8567	70.5	75.1335	70.5	82.2165	70.5	83.9407	70.5	83.026
	71.5	92.4578	71.5	79.8799	71.5	79.6628	71.5	82.6499	71.5	75.4562	71.5	82.8713	71.5	83.9207	71.5	83.8209
	72.5	92.2867	72.5	78.8595	72.5	79.772	72.5	82.2153	72.5	75.0289	72.5	82.1856	72.5	84.1247	72.5	82.7807
	73.5	92.0452	73.5	80.2966	73.5	80.1788	73.5	81.6494	73.5	74.168	73.5	82.3567	73.5	84.4364	73.5	82.3496
	74.5	92.0742	74.5	79.3038	74.5	79.6728	74.5	81.6035	74.5	74.6982	74.5	82.0498	74.5	83.9571	74.5	82.2766
	75.5	91.451	75.5	78.9999	75.5	79.4295	75.5	81.2986	75.5	74.8715	75.5	82.2085	75.5	83.2009	75.5	83.0629
	76.5	91.6679	76.5	80.8196	76.5	79.9047	76.5	81.7406	76.5	74.6965	76.5	81.7336	76.5	83.8872	76.5	81.9867
	77.5	92.5693	77.5	80.6992	77.5	80.3459	77.5	82.2532	77.5	74.5853	77.5	81.9124	77.5	83.6343	77.5	82.4064
	78.5	93.3473	78.5	79.967	78.5	79.561	78.5	82.0518	78.5	74.9234	78.5	83.1547	78.5	83.9729	78.5	82.896
	79.5	91.8436	79.5	80.1016	79.5	80.8001	79.5	82.2115	79.5	74.8805	79.5	83.1302	79.5	84.8233	79.5	81.9672
	80.5	92.1189	80.5	79.3339	80.5	79.5703	80.5	81.697	80.5	75.3871	80.5	82.739	80.5	84.107	80.5	82.1586
	81.5	91.4412	81.5	79.5817	81.5	79.5844	81.5	82.1409	81.5	75.1193	81.5	82.6694	81.5	83.9303	81.5	82.0623
	82.5	92.5016	82.5	79.8769	82.5	80.2632	82.5	81.6992	82.5	74.1636	82.5	83.248	82.5	83.9114	82.5	82.7999
	83.5	92.3808	83.5	78.9878	83.5	79.7242	83.5	82.8733	83.5	75.0414	83.5	82.2416	83.5	83.8655	83.5	82.0966
	84.5	92.3469	84.5	79.8964	84.5	79.581	84.5	82.3251	84.5	74.629	84.5	80.7969	84.5	83.5619	84.5	82.3892
	85.5	92.2992	85.5	79.6212	85.5	79.8089	85.5	81.3453	85.5	75.3446	85.5	82.5967	85.5	83.2667	85.5	82.2486
	86.5	92.5737	86.5	79.4857	86.5	79.7931	86.5	81.7281	86.5	75.4311	86.5	82.0557	86.5	82.6872	86.5	82.1689
	87.5	92.1636	87.5	79.29	87.5	80.4781	87.5	81.2619	87.5	74.5752	87.5	82.7149	87.5	84.1696	87.5	81.8854
	88.5	92.0166	88.5	79.663	88.5	80.1148	88.5	82.3266	88.5	75.3394	88.5	81.9628	88.5	83.4397	88.5	82.363
	89.5	91.5843	89.5	80.2707	89.5	80.7921	89.5	82.6503	89.5	75.042	89.5	82.4073	89.5	84.3364	89.5	82.5821
	90.5	92.3708	90.5	80.1165	90.5	80.0881	90.5	82.3549	90.5	75.8026	90.5	82.0942	90.5	84.1489	90.5	82.4554
	91.5	92.7249	91.5	79.1731	91.5	80.5019	91.5	81.9462	91.5	74.9467	91.5	81.8747	91.5	83.8113	91.5	82.7357
	92.5	92.3216	92.5	79.5712	92.5	79.7002	92.5	81.75	92.5	74.4291	92.5	82.022	92.5	83.4401	92.5	82.2965
	93.5	92.4681	93.5	79.524	93.5	79.5158	93.5	83.0577	93.5	74.7243	93.5	82.5535	93.5	83.3445	93.5	82.4327
	94.5	92.0302	94.5	78.4426	94.5	80.4447	94.5	81.7624	94.5	75.2099	94.5	83.1145	94.5	84.2455	94.5	82.0322
	95.5	92.2906	95.5	79.8633	95.5	80.0642	95.5	81.0219	95.5	75.2883	95.5	81.8678	95.5	83.7132	95.5	82.6868
	96.5	92.4859	96.5	79.0063	96.5	80.2583	96.5	81.1751	96.5	74.6438	96.5	82.1607	96.5	83.7056	96.5	81.458
	97.5	92.1003	97.5	79.2091	97.5	80.5659	97.5	81.2972	97.5	74.0264	97.5	83.4185	97.5	83.1094	97.5	82.0435
	98.5	92.8319	98.5	80.1994	98.5	79.5572	98.5	81.5082	98.5	75.0222	98.5	82.3722	98.5	84.0253	98.5	80.8675
	99.5	92.0496	99.5	79.317	99.5	79.1555	99.5	81.0822	99.5	74.7404	99.5	82.3031	99.5	84.4343	99.5	82.6422
	100.5	92.644	100.5	78.9164	100.5	80.7489	100.5	81.5383	100.5	74.9164	100.5	82.182	100.5	83.0125	100.5	81.5515
	101.5	92.9301	101.5	78.7555	101.5	80.4718	101.5	81.6664	101.5	73.705	101.5	82.8269	101.5	84.5205	101.5	82.5373
	102.5	91.7873	102.5	79.3303	102.5	80.063	102.5	81.9316	102.5	75.0409	102.5	82.7032	102.5	83.3847	102.5	81.5738
	103.5	91.5147	103.5	79.6554	103.5	79.5643	103.5	81.3881	103.5	74.7699	103.5	81.6878	103.5	84.9663	103.5	82.432
	104.5	91.2757	104.5	79.4354	104.5	79.6783	104.5	81.8779	104.5	74.4138	104.5	82.8204	104.5	83.785	104.5	81.8882
	105.5	91.8952	105.5	79.3481	105.5	80.358	105.5	81.6945	105.5	74.354	105.5	82.2329	105.5	83.798	105.5	82.947
	106.5	92.9077	106.5	79.0675	106.5	80.3908	106.5	81.3123	106.5	74.0464	106.5	82.2116	106.5	83.4146	106.5	82.521
	107.5	92.1151	107.5	79.9007	107.5	80.141	107.5	81.4753	107.5	74.8934	107.5	81.8681	107.5	83.3886	107.5	81.7281
	108.5	91.7211	108.5	79.647	108.5	80.1856	108.5	82.3458	108.5	76.0048	108.5	81.7426	108.5	83.8578	108.5	83.0344
	109.5	91.434	109.5	79.2135	109.5	79.7236	109.5	81.7634	109.5	74.9514	109.5	80.7153	109.5	83.9296	109.5	82.9911
	110.5	91.8517	110.5	79.55	110.5	80.4566	110.5	82.1564	110.5	74.0619	110.5	82.1191	110.5	83.7623	110.5	81.5287
	111.5	91.406	111.5	79.5752	111.5	79.2259	111.5	82.5768	111.5	74.9546	111.5	82.128	111.5	84.1294	111.5	82.3714
	112.5	92.3535	112.5	79.4511	112.5	80.1403	112.5	82.0174	112.5	75.1237	112.5	81.9008	112.5	83.3298	112.5	82.2629
	113.5	91.7679	113.5	79.6236	113.5	80.5778	113.5	82.057	113.5	74.0981	113.5	82.6534	113.5	84.6488	113.5	82.2751
	114.5	92.4998	114.5	80.3417	114.5	79.7973	114.5	82.5648	114.5	74.4101	114.5	82.1302	114.5	84.2391	114.5	82.4215
	115.5	91.6896	115.5	80.09	115.5	79.8668	115.5	81.7266	115.5	74.6798	115.5	82.7658	115.5	84.0321	115.5	82.1043
	116.5	92.545	116.5	79.7335	116.5	80.3807	116.5	82.1342	116.5	75.1481	116.5	82.0454	116.5	84.2504	116.5	81.7206
	117.5	92.1218	117.5	79.7028	117.5	80.2187	117.5	82.0874	117.5	74.6159	117.5	81.9954	117.5	83.6034	117.5	82.1724
	118.5	92.4159	118.5	80.0722	118.5	79.2217	118.5	81.4947	118.5	75.1042	118.5	81.9764	118.5	83.3363	118.5	81.9399
	119.5	91.3985	119.5	79.8764	119.5	79.7352	119.5	81.7406	119.5	74.6824	119.5	81.6595	119.5	83.4423	119.5	82.9002
	120.5	93.2708	120.5	79.2727	120.5	79.9002	120.5	81.5286	120.5	74.2006	120.5	81.9027	120.5	83.2169	120.5	82.0086
	121.5	92.8799	121.5	79.4917	121.5	80.2464	121.5	81.8837	121.5	74.7885	121.5	82.2228	121.5	83.6239	121.5	83.0053
	122.5	91.9852	122.5	80.0644	122.5	79.4336	122.5	82.3211	122.5	74.6106	122.5	82.5251	122.5	83.8821	122.5	83.062
	123.5	92.5341	123.5	80.0185	123.5	80.5173	123.5	81.1392	123.5	74.0371	123.5	82.5224	123.5	83.4397	123.5	82.0665
	124.5	92.5718	124.5	79.188	124.5	79.7171	124.5	81.3834	124.5	73.724	124.5	82.119	124.5	83.989	124.5	82.9941
	125.5	91.469	125.5	79.612	125.5	80.2531	125.5	81.4297	125.5	74.6086	125.5	82.2941	125.5	83.3927	125.5	82.5626
	126.5	92.6742	126.5	79.3635	126.5	80.1899	126.5	81.4531	126.5	75.0568	126.5	82.0574	126.5	83.7273	126.5	82.7027
	127.5	92.0533	127.5	80.0017	127.5	80.0042	127.5	81.8713	127.5	75.5203	127.5	81.7852	127.5	83.6063	127.5	82.2582
	128.5	92.2374	128.5	79.7319	128.5	80.0905	128.5	82.0223	128.5	73.7999	128.5	82.3366	128.5	84.7156	128.5	82.8184
	129.5	92.208	129.5	79.3698	129.5	80.343	129.5	81.3749	129.5	74.2337	129.5	82.2368	129.5	84.0763	129.5	83.6804
	130.5	92.3114	130.5	80.0992	130.5	80.2868	130.5	82.3616	130.5	74.5776	130.5	82.2054	130.5	83.7696	130.5	82.609
	131.5	91.3138	131.5	80.2897	131.5	79.8663	131.5	81.5888	131.5	74.5873	131.5	82.3859	131.5	83.4803	131.5	83.5594
	132.5	92.1502	132.5	79.0641	132.5	81.3385	132.5	82.0219	132.5	74.0652	132.5	82.2963	132.5	84.002	132.5	81.5336
	133.5	91.3129	133.5	80.5953	133.5	81.1177	133.5	81.1876	133.5	74.8022	133.5	82.717	133.5	84.2248	133.5	81.7929
	134.5	91.4828	134.5	79.8434	134.5	79.3575	134.5	81.9977	134.5	74.7954	134.5	82.5304	134.5	83.6975	134.5	82.4452
	135.5	92.7898	135.5	79.6559	135.5	80.4764	135.5	82.6368	135.5	74.3455	135.5	82.324	135.5	83.4302	135.5	82.3346
	136.5	92.5588	136.5	79.345	136.5	80.3989	136.5	81.1516	136.5	74.9481	136.5	81.7821	136.5	83.7749	136.5	82.8748
	137.5	91.9984	137.5	79.6816	137.5	80.674	137.5	80.1606	137.5	74.6294	137.5	81.8762	137.5	84.4726	137.5	83.1064
	138.5	91.9615	138.5	80.0721	138.5	80.466	138.5	82.0521	138.5	74.4952	138.5	83.2368	138.5	83.3686	138.5	81.8866
	139.5	91.9861	139.5	79.4266	139.5	79.8852	139.5	81.1889	139.5	75.1392	139.5	81.8164	139.5	84.5829	139.5	83.1666
	140.5	91.7692	140.5	80.0329	140.5	80.1763	140.5	81.7638	140.5	74.596	140.5	81.9336	140.5	84.2366	140.5	82.0276
	141.5	91.861	141.5	80.4618	141.5	80.41	141.5	81.5838	141.5	74.9989	141.5	82.7636	141.5	83.3628	141.5	82.6447
	142.5	91.6052	142.5	79.7911	142.5	80.9739	142.5	81.3681	142.5	73.8919	142.5	82.5887	142.5	84.0338	142.5	81.8558
	143.5	92.1798	143.5	79.5138	143.5	79.6644	143.5	81.6925	143.5	74.9489	143.5	81.228	143.5	83.0073	143.5	83.493
	144.5	91.7311	144.5	79.1671	144.5	80.6803	144.5	82.1724	144.5	74.1712	144.5	80.7738	144.5	83.7626	144.5	82.6956
	145.5	91.9339	145.5	80.6262	145.5	78.9281	145.5	82.3765	145.5	74.152	145.5	82.9354	145.5	83.7	145.5	82.7263
	146.5	92.0294	146.5	79.5439	146.5	81.2083	146.5	81.9028	146.5	74.6128	146.5	81.5048	146.5	84.3594	146.5	83.0809
	147.5	91.9307	147.5	79.9161	147.5	80.4676	147.5	83.0472	147.5	74.0211	147.5	81.9276	147.5	84.0773	147.5	83.5198
	148.5	91.3584	148.5	79.1453	148.5	79.7073	148.5	82.4116	148.5	74.8448	148.5	81.8386	148.5	83.4595	148.5	83.3194
	149.5	91.8217	149.5	79.2605	149.5	80.4385	149.5	82.1949	149.5	75.7492	149.5	82.4442	149.5	83.0526	149.5	82.8662
	150.5	91.0821	150.5	79.6301	150.5	80.2172	150.5	81.5522	150.5	74.8902	150.5	81.6916	150.5	83.6543	150.5	82.5559
	151.5	90.6124	151.5	79.1396	151.5	79.3348	151.5	82.3662	151.5	74.0739	151.5	81.6604	151.5	84.6799	151.5	83.0109
	152.5	91.695	152.5	80.2762	152.5	80.1908	152.5	81.1734	152.5	74.3017	152.5	81.5751	152.5	83.4387	152.5	82.1239
	153.5	91.3736	153.5	79.946	153.5	80.2367	153.5	81.8983	153.5	74.1971	153.5	81.5749	153.5	83.813	153.5	81.9817
	154.5	91.7597	154.5	79.5404	154.5	79.8252	154.5	81.7627	154.5	74.19	154.5	82.2481	154.5	83.1515	154.5	82.9712
	155.5	91.6845	155.5	78.9057	155.5	79.9291	155.5	82.465	155.5	74.3796	155.5	82.1588	155.5	84.4143	155.5	82.1704
	156.5	91.6615	156.5	79.4128	156.5	79.4488	156.5	81.505	156.5	74.2745	156.5	82.511	156.5	83.6991	156.5	82.628
	157.5	92.0099	157.5	79.7285	157.5	80.1241	157.5	82.1016	157.5	74.4839	157.5	81.039	157.5	83.6989	157.5	82.5912
	158.5	91.6561	158.5	79.289	158.5	80.289	158.5	82.39	158.5	74.0025	158.5	82.5429	158.5	83.1701	158.5	83.019
	159.5	91.0952	159.5	78.9626	159.5	80.4102	159.5	82.6292	159.5	74.6125	159.5	81.35	159.5	83.9638	159.5	82.495
	160.5	91.9383	160.5	78.7638	160.5	80.9733	160.5	81.6335	160.5	74.4706	160.5	82.6026	160.5	84.0078	160.5	82.602
	161.5	91.9534	161.5	80.2762	161.5	79.7793	161.5	83.0394	161.5	74.9803	161.5	81.6128	161.5	83.1012	161.5	83.0137
	162.5	91.292	162.5	80.1938	162.5	79.519	162.5	82.5107	162.5	74.4025	162.5	81.3988	162.5	83.7896	162.5	82.041
	163.5	91.8955	163.5	80.55	163.5	80.817	163.5	81.5202	163.5	75.3173	163.5	81.6484	163.5	83.9514	163.5	82.3747
	164.5	92.9991	164.5	80.0543	164.5	79.7206	164.5	81.5577	164.5	74.7258	164.5	82.3459	164.5	83.5448	164.5	82.7416
	165.5	92.5925	165.5	79.2173	165.5	79.9723	165.5	82.6239	165.5	73.6796	165.5	81.6132	165.5	84.0954	165.5	83.3551
	166.5	92.1674	166.5	79.3693	166.5	80.0281	166.5	81.6574	166.5	74.5444	166.5	82.2082	166.5	84.1311	166.5	83.6707
	167.5	91.5294	167.5	79.5619	167.5	79.9309	167.5	81.7331	167.5	74.6773	167.5	81.6912	167.5	83.7631	167.5	83.2279
	168.5	91.4735	168.5	79.521	168.5	81.3597	168.5	82.3226	168.5	75.378	168.5	83.2977	168.5	84.1721	168.5	83.0542
	169.5	91.6122	169.5	78.5906	169.5	79.6021	169.5	81.818	169.5	74.4746	169.5	80.9442	169.5	83.4367	169.5	82.064
	170.5	91.7797	170.5	80.0199	170.5	80.1482	170.5	82.5924	170.5	74.5648	170.5	82.2074	170.5	84.9877	170.5	82.7494
	171.5	91.7142	171.5	79.0315	171.5	80.2126	171.5	82.0251	188.624	75.9136	171.5	81.8789	171.5	84.1538	171.5	83.5246
	172.5	92.4672	172.5	78.7837	172.5	80.5828	172.5	82.2428	189.624	76.8312	172.5	81.0786	172.5	83.4496	172.5	81.9861
	173.5	91.0983	173.5	78.9773	173.5	80.0233	173.5	82.277	190.624	76.9721	173.5	81.8664	173.5	84.8537	173.5	83.8309
	174.5	91.4497	174.5	79.2947	174.5	80.0671	174.5	82.6381	191.624	77.6076	174.5	82.1784	174.5	84.5806	174.5	82.4753
	175.5	91.6988	175.5	79.0684	175.5	79.9256	175.5	82.7174	192.624	77.5235	175.5	82.6786	175.5	83.2517	175.5	83.3466
	176.5	92.4214	176.5	79.4177	176.5	80.8192	176.5	81.7176	193.624	77.1244	176.5	82.8717	176.5	84.0901	176.5	81.9416
	177.5	92.0132	177.5	79.5982	177.5	80.749	177.5	82.393	194.624	77.9315	177.5	82.6398	177.5	84.269	177.5	83.7689
	178.5	92.3817	178.5	78.8835	178.5	80.4729	178.5	81.5498	195.624	77.049	178.5	82.2318	178.5	84.4606	178.5	83.9636
	179.5	91.8828	179.5	79.3665	179.5	80.2598	179.5	81.6664	196.624	76.6068	179.5	82.6219	179.5	84.0967	179.5	82.6814
	180.5	91.8603	180.5	79.2384	180.5	80.2199	180.5	82.1934	197.624	76.8229	180.5	81.8181	180.5	84.3778	180.5	82.8592
	181.5	91.818	181.5	78.7472	181.5	79.1856	181.5	82.3177	198.624	77.52	181.5	82.0574	181.5	83.36	181.5	82.5531
	182.5	92.6859	182.5	79.8171	182.5	79.995	182.5	82.2956	199.624	77.7358	182.5	81.7677	182.5	83.9294	182.5	82.8415
	183.5	92.4271	183.5	79.3705	183.5	79.5743	183.5	82.5832	200.624	77.843	183.5	81.2274	183.5	83.9164	183.5	83.1514
	184.5	91.8155	184.5	79.2304	184.5	80.5006	184.5	81.9867	201.624	76.7476	184.5	82.3127	184.5	83.9591	184.5	83.0968
	185.5	91.0071	185.5	78.4493	185.5	80.3844	185.5	82.6435	202.624	77.3047	185.5	81.1608	185.5	84.1155	185.5	82.2436
	186.5	91.3655	186.5	79.3366	186.5	80.9627	186.5	82.1448	203.624	77.4616	186.5	81.5288	186.5	84.3232	186.5	82.5752
	204.22	92.3184	187.5	78.7446	187.5	79.8125	187.5	82.1479	204.624	77.1716	187.5	82.4309	187.5	83.5407	187.5	82.8273
	205.22	93.1088	188.5	79.5418	188.5	80.6939	188.5	81.5858	205.624	78.2895	188.5	81.7174	188.5	83.5577	188.5	82.4617
	206.22	93.0142	189.5	79.2233	189.5	79.8089	189.5	82.5656	206.624	77.968	189.5	81.5634	189.5	84.2846	189.5	83.4441
	207.22	93.5664	190.5	79.4188	190.5	80.4957	190.5	82.7303	207.624	77.0732	190.5	82.4918	190.5	83.5954	190.5	82.6643
	208.22	92.1625	191.5	79.9907	191.5	80.1393	191.5	83.0859	208.624	77.8709	191.5	81.8419	191.5	84.0634	191.5	82.739
	209.22	93.1917	192.5	79.7074	192.5	80.7342	192.5	81.9932	209.624	78.7464	192.5	82.2666	192.5	83.9719	192.5	84.0499
	210.22	93.2195	193.5	78.8797	193.5	79.9922	193.5	82.4737	210.624	78.1392	193.5	82.9175	193.5	83.7654	193.5	82.5074
	211.22	93.6927	194.5	79.0561	194.5	80.3018	194.5	82.2033	211.624	77.5281	194.5	81.3452	194.5	83.7641	194.5	83.5642
	212.22	93.9725	195.5	79.9795	195.5	80.095	195.5	82.1427	212.624	77.4089	195.5	82.347	195.5	83.0881	195.5	83.1642
	213.22	92.8709	196.5	78.4203	196.5	80.1297	196.5	81.3667	213.624	79.0143	196.5	82.7563	196.5	83.7158	196.5	82.8275
	214.22	94.1072	197.5	79.0505	197.5	79.7887	197.5	82.2746	214.624	78.4567	197.5	81.9251	197.5	84.0234	197.5	82.4901
	215.22	93.789	198.5	80.2627	198.5	80.1458	198.5	82.2136	215.624	78.3873	198.5	83.3065	198.5	83.3536	198.5	81.9989
	216.22	93.5054	199.5	79.6755	199.5	79.3674	199.5	81.8867	216.624	77.99	199.5	83.0851	199.5	84.2062	199.5	82.9628
	217.22	93.9511	200.5	79.7629	200.5	80.2863	200.5	81.9474	217.624	78.2732	200.5	82.6532	200.5	84.4674	200.5	83.1381
	218.22	92.8253	201.5	79.3784	201.5	81.7085	201.5	81.7564	218.624	78.1831	201.5	81.7376	201.5	83.6086	201.5	82.828
	219.22	93.6843	202.5	79.5527	202.5	80.2407	202.5	81.8422	219.624	78.7498	202.5	82.3325	202.5	83.9627	202.5	83.6618
	220.22	93.9553	203.5	78.716	203.5	80.2795	203.5	81.9407	220.624	78.2747	203.5	81.9711	203.5	83.9072	203.5	82.1024
	221.22	94.984	204.5	78.6857	204.5	80.1995	204.5	81.6833	221.624	78.5921	204.5	82.7933	204.5	83.2461	204.5	82.3213
	222.22	93.2714	205.5	79.1453	205.5	80.105	205.5	82.9373	222.624	77.8992	205.5	82.2005	205.5	83.7619	205.5	82.1482
	223.22	93.7254	206.5	78.6407	206.5	80.2191	206.5	82.2436	223.624	78.5006	206.5	82.5914	206.5	84.165	206.5	82.9524
	224.22	93.5687	207.5	79.8594	207.5	80.12	207.5	81.6518	224.624	77.5558	207.5	82.0348	207.5	83.9394	207.5	82.1146
	225.22	94.3067	231.33	84.209	208.5	80.8449	208.5	81.8827	225.624	77.7047	208.5	81.444	208.5	84.3314	208.5	83.2403
	226.22	94.5142	232.33	84.5827	209.5	80.5112	209.5	81.7529	226.624	79.1761	209.5	83.3981	209.5	83.5835	209.5	82.8361
	227.22	93.6445	233.33	84.4716	210.5	80.6563	210.5	82.4249	227.624	77.4529	210.5	82.265	210.5	82.9451	210.5	82.7309
	228.22	94.8349	234.33	84.8682	211.5	80.3814	211.5	82.4825	228.624	78.5944	211.5	82.2746	211.5	83.2485	211.5	83.2314
	229.22	94.3659	235.33	84.7122	212.5	79.1904	212.5	82.38	229.624	78.7161	212.5	82.3526	212.5	84.1469	212.5	82.0865
	230.22	94.0202	236.33	84.2279	213.5	80.2044	213.5	82.4447	230.624	78.433	213.5	82.3973	213.5	82.8796	213.5	82.4542
	231.22	94.5449	237.33	84.3928	214.5	80.7529	214.5	82.0543	231.624	78.4621	214.5	82.1401	214.5	83.8411	214.5	82.8051
	232.22	94.4788	238.33	84.5961	215.5	80.58	215.5	81.9841	232.624	77.7741	215.5	82.9492	215.5	83.2399	215.5	83.8413
	233.22	94.6626	239.33	83.9546	239.68	81.0491	216.5	82.3972	233.624	78.1867	216.5	82.3025	216.5	83.6712	216.5	82.5583
	234.22	94.967	240.33	84.0279	240.68	81.6808	235.459	83.2845	234.624	78.8445	217.5	83.1519	217.5	83.145	217.5	82.44
	235.22	94.5167	241.33	84.8133	241.68	81.6777	236.459	83.1262	235.624	78.6369	218.5	82.5659	218.5	84.0775	218.5	81.9825
	236.22	94.496	242.33	83.4964	242.68	81.1884	237.459	82.4694	236.624	78.0084	219.5	82.4993	219.5	83.2393	219.5	83.4397
	237.22	93.6131	243.33	85.888	243.68	81.8148	238.459	83.5094	237.624	78.6262	220.5	82.8914	220.5	83.7063	220.5	83.0215
	238.22	94.2891	244.33	85.2576	244.68	81.8482	239.459	82.5971	238.624	78.6505	241.086	81.6336	221.5	84.1649	221.5	83.6873
	239.22	94.9458	245.33	84.5292	245.68	81.5827	240.459	83.1029	239.624	79.0656	242.086	82.3647	222.5	83.569	222.5	81.3104
	240.22	95.0234	246.33	84.5463	246.68	81.1823	241.459	82.6974	240.624	78.0995	243.086	82.3195	223.5	83.8306	223.5	84.1494
	241.22	94.9179	247.33	85.2271	247.68	81.4464	242.459	82.21	241.624	79.3161	244.086	81.5364	224.5	84.2344	224.5	82.8125
	242.22	95.6119	248.33	85.1693	248.68	81.5015	243.459	82.7963	242.624	79.8086	245.086	82.0695	225.5	82.768	225.5	83.0859
	243.22	95.3109	249.33	85.138	249.68	80.6766	244.459	83.7643	243.624	78.6516	246.086	81.9357	226.5	83.7251	226.5	83.6364
	244.22	94.4052	250.33	84.7613	250.68	81.6666	245.459	83.4177	244.624	77.9023	247.086	82.2494	227.5	83.4798	227.5	82.8074
	245.22	95.5923	251.33	84.923	251.68	81.3268	246.459	83.4328	245.624	79.9732	248.086	82.0648	228.5	83.5428	228.5	82.2161
	246.22	94.8335	252.33	83.6507	252.68	81.4306	247.459	83.8534	246.624	78.8934	249.086	82.0473	229.5	83.6266	229.5	82.288
	247.22	95.1091	253.33	84.5388	253.68	81.3993	248.459	84.371	247.624	78.5489	250.086	82.3151	230.5	84.3428	230.5	82.1885
	248.22	95.3773	254.33	85.8546	254.68	81.8656	249.459	83.9292	248.624	78.4214	251.086	83.2439	251.266	85.5498	231.5	82.6044
	249.22	95.6224	255.33	85.039	255.68	81.525	250.459	83.6362	249.624	78.3664	252.086	81.4767	252.266	85.8373	232.5	82.2035
	250.22	94.7989	256.33	85.1335	256.68	82.3426	251.459	84.7069	250.624	78.4857	253.086	82.5768	253.266	84.9643	233.5	82.5302
	251.22	95.9939	257.33	85.1522	257.68	82.0969	252.459	84.1041	251.624	78.9131	254.086	82.8599	254.266	85.7641	234.5	83.3541
	252.22	94.6684	258.33	84.8991	258.68	81.9327	253.459	84.3845	252.624	79.2528	255.086	82.0766	255.266	85.9768	235.5	81.7075
	253.22	95.7915	259.33	85.7327	259.68	82.1265	254.459	83.1149	253.624	78.8433	256.086	82.4223	256.266	85.8101	236.5	82.3152
	254.22	96.9318	260.33	85.1235	260.68	82.5664	255.459	84.7049	254.624	78.6117	257.086	83.0821	257.266	85.7264	237.5	82.1501
	255.22	95.2735	261.33	86.6025	261.68	81.5114	256.459	84.5595	255.624	79.1465	258.086	82.0746	258.266	86.3212	238.5	82.5569
	256.22	96.9315	262.33	85.6345	262.68	80.8406	257.459	84.1077	256.624	78.83	259.086	83.3859	259.266	86.324	239.5	82.3189
	257.22	96.3592	263.33	85.7185	263.68	82.4643	258.459	83.886	257.624	78.1189	260.086	82.5335	260.266	86.3131	240.5	82.9768
	258.22	97.115	264.33	85.9333	264.68	81.7933	259.459	84.3673	258.624	79.5124	261.086	82.2657	261.266	86.0861	241.5	82.7244
	259.22	95.6995	265.33	85.5931	265.68	81.7681	260.459	83.8475	259.624	79.0628	262.086	82.7131	262.266	86.224	242.5	82.7318
	260.22	95.6201	266.33	85.4594	266.68	83.1762	261.459	84.3602	260.624	79.9928	263.086	83.1864	263.266	86.172	243.5	82.4996
	261.22	96.0126	267.33	85.1557	267.68	81.9427	262.459	83.5513	261.624	79.948	264.086	82.2156	264.266	86.452	244.5	82.7213
	262.22	95.6832	268.33	86.5382	268.68	82.7958	263.459	84.7494	262.624	78.2105	265.086	82.6534	265.266	86.2733	245.5	82.7688
	263.22	95.9795	269.33	86.3443	269.68	81.6987	264.459	85.0292	263.624	78.5172	266.086	82.9635	266.266	86.5647	246.5	82.7657
	264.22	96.7875	270.33	86.7729	270.68	81.7859	265.459	84.8109	264.624	79.2357	267.086	82.2743	267.266	86.6415	247.5	82.3357
	265.22	96.0134	271.33	86.6104	271.68	81.6335	266.459	85.0595	265.624	79.2259	268.086	82.934	268.266	86.5282	248.5	82.4104
	266.22	96.8554	272.33	85.9142	272.68	81.9137	267.459	84.5579	266.624	78.5727	269.086	83.1517	269.266	86.5487	249.5	83.0397
	267.22	97.078	273.33	86.9067	273.68	83.2204	268.459	85.2397	267.624	78.6933	270.086	82.1949	270.266	86.8003	250.5	82.5633
	268.22	97.6386	274.33	87.0663	274.68	82.7118	269.459	85.3573	268.624	78.3451	271.086	81.8688	271.266	86.502	251.5	82.672
	269.22	96.3304	275.33	86.0652	275.68	83.0836	270.459	84.6763	269.624	79.131	272.086	82.0744	272.266	87.0073	252.5	82.2642
	270.22	97.5411	276.33	86.2475	276.68	83.1074	271.459	84.3237	270.624	79.6698	273.086	83.9336	273.266	85.9194	253.5	83.2606
	271.22	96.6543	277.33	85.7766	277.68	83.0593	272.459	84.6916	271.624	78.4823	274.086	83.1285	274.266	86.1642	254.5	83.0519
	272.22	97.447	278.33	85.9781	278.68	83.919	273.459	83.9801	272.624	77.6632	275.086	82.8327	275.266	86.8525	255.5	82.4094
	273.22	97.3074	279.33	87.0908	279.68	82.7602	274.459	84.1073	273.624	78.6458	276.086	83.3049	276.266	87.1684	256.5	82.9057
	274.22	97.8999	280.33	86.0656	280.68	83.5865	275.459	83.8853	274.624	78.8461	277.086	82.921	277.266	87.0213	257.5	82.4682
	275.22	97.019	281.33	86.5555	281.68	83.0884	276.459	84.2168	275.624	78.665	278.086	83.8816	278.266	86.3229	258.5	82.114
	276.22	97.0557	282.33	86.4615	282.68	82.7195	277.459	85.0376	276.624	78.2033	279.086	83.2413	279.266	86.3717	259.5	82.9003
	277.22	98.5412	283.33	87.1105	283.68	83.1776	278.459	85.5289	277.624	77.7386	280.086	82.8255	280.266	86.7593	260.5	83.12
	278.22	98.4418	284.33	86.6139	284.68	82.6999	279.459	84.8251	278.624	79.2387	281.086	83.0682	281.266	85.8889	261.5	81.8719
	279.22	97.0046	285.33	86.7734	285.68	82.7113	280.459	84.5812	279.624	78.3378	282.086	83.6017	282.266	86.8183	262.5	83.0795
	280.22	97.3457	286.33	87.5037	286.68	83.1131	281.459	85.7124	280.624	78.5967	283.086	83.3653	283.266	86.9144	263.5	82.8792
	281.22	96.1309	287.33	87.2588	287.68	83.4547	282.459	84.9071	281.624	79.0171	284.086	83.0535	284.266	86.3512	264.5	83.1572
	282.22	97.3744	288.33	87.5797	288.68	83.8326	283.459	85.5227	282.624	78.8676	285.086	84.0233	285.266	86.2402	265.5	83.7576
	283.22	98.3834	289.33	87.759	289.68	84.3815	284.459	85.0971	283.624	78.8729	286.086	83.1143	286.266	86.8884	266.5	82.3339
	284.22	97.7114	290.33	87.8944	290.68	83.6888	285.459	85.1489	284.624	78.3724	287.086	83.0562	287.266	87.378	267.5	83.6088
	285.22	98.2462	291.33	87.6711	291.68	84.0257	286.459	85.5474	285.624	78.2016	288.086	84.1645	288.266	86.9003	268.5	82.5557
	286.22	98.3424	292.33	87.7261	292.68	84.5704	287.459	85.1692	286.624	78.2414	289.086	83.6256	289.266	86.4126	269.5	83.1
	287.22	98.1358	293.33	88.4033	293.68	83.4319	288.459	85.1998	287.624	79.2566	290.086	83.6287	290.266	86.463	270.5	82.7264
	288.22	97.5187	294.33	87.1497	294.68	83.6415	289.459	85.23	288.624	78.1622	291.086	82.5203	291.266	86.6443	271.5	83.1987
	289.22	98.3504	295.33	87.3107	295.68	84.178	290.459	85.1665	289.624	78.2143	292.086	82.7471	292.266	86.9154	272.5	83.311
	290.22	97.9815	296.33	87.3486	296.68	84.435	291.459	85.7126	290.624	78.6102	293.086	83.4647	293.266	86.4634	273.5	83.1356
	291.22	97.6754	297.33	87.7359	297.68	84.145	292.459	85.6754	291.624	78.6367	294.086	83.5053	294.266	86.8705	274.5	83.6049
	292.22	97.4559	298.33	87.519	298.68	85.0111	293.459	84.8218	292.624	78.8702	295.086	83.4358	295.266	86.4199	295.555	83.4031
	293.22	98.4696	299.33	88.651	299.68	84.6353	294.459	84.9566	293.624	79.3175	296.086	83.7115	296.266	86.4214	296.555	84.7945
	294.22	98.0282	300.33	87.756	300.68	84.69	295.459	85.2613	294.624	79.3515	297.086	83.8308	297.266	86.8878	297.555	84.8108
	295.22	99.0941	301.33	88.3658	301.68	84.2565	296.459	85.8754	295.624	78.6045	298.086	83.0764	298.266	86.6707	298.555	83.9939
	296.22	98.5405	302.33	87.9063	302.68	85.1587	297.459	86.5286	296.624	79.2562	299.086	82.2728	299.266	86.9956	299.555	85.0559
	297.22	98.013	303.33	88.7311	303.68	84.4552	298.459	85.4204	297.624	78.9811	300.086	84.0031	300.266	86.725	300.555	85.4094
	298.22	98.009	304.33	87.5423	304.68	84.6252	299.459	86.7195	298.624	79.2489	301.086	82.9727	301.266	86.8718	301.555	85.5007
	299.22	98.9058	305.33	88.8538	305.68	85.0036	300.459	85.725	299.624	78.5547	302.086	83.9718	302.266	86.3537	302.555	84.7667
	300.22	98.3252	306.33	88.4294	306.68	86.0908	301.459	85.5821	300.624	79.5573	303.086	83.5284	303.266	86.4752	303.555	85.7661
	301.22	98.6878	307.33	88.45	307.68	84.961	302.459	86.175	301.624	78.2896	304.086	83.8056	304.266	87.4877	304.555	85.4761
	302.22	97.5878	308.33	87.9871	308.68	84.7279	303.459	85.3103	302.624	79.3719	305.086	84.0047	305.266	87.3975	305.555	85.4182
	303.22	99.6328	309.33	88.9342	309.68	85.6822	304.459	86.2824	303.624	79.4761	306.086	84.3403	306.266	86.438	306.555	84.6544
	304.22	98.4791	310.33	88.0278	310.68	85.442	305.459	86.4834	304.624	79.0287	307.086	83.8351	307.266	86.9144	307.555	85.1176
	305.22	98.8079	311.33	87.8948	311.68	85.3188	306.459	85.0101	305.624	79.7876	308.086	84.1529	308.266	87.0125	308.555	86.0574
	306.22	98.838	312.33	88.3418	312.68	84.6615	307.459	87.4215	306.624	78.0968	309.086	83.8091	309.266	87.1873	309.555	85.8315
	307.22	98.8752	313.33	89.207	313.68	84.2369	308.459	86.0116	307.624	78.5102	310.086	83.5829	310.266	87.2539	310.555	85.9422
	308.22	99.6699	314.33	88.9833	314.68	84.4518	309.459	86.2316	308.624	78.5474	311.086	83.9996	311.266	86.7778	311.555	86.0158
	309.22	98.5801	315.33	89.0022	315.68	85.8097	310.459	85.7933	309.624	78.3609	312.086	84.7201	312.266	86.0116	312.555	86.2534
	310.22	99.3056	316.33	88.8143	316.68	85.0795	311.459	86.0838	310.624	79.5213	313.086	83.8777	313.266	87.1223	313.555	85.098
	311.22	98.878	317.33	88.0575	317.68	85.9928	312.459	85.847	311.624	79.2926	314.086	82.571	314.266	86.8563	314.555	85.0694
	312.22	98.9599	318.33	88.9633	318.68	85.2021	313.459	85.5392	312.624	79.3683	315.086	83.4895	315.266	86.4333	315.555	85.6388
	313.22	99.0487	319.33	88.7202	319.68	85.1578	314.459	86.6605	313.624	78.1366	316.086	83.1746	316.266	87.108	316.555	86.2021
	314.22	99.0801	320.33	89.1068	320.68	85.2893	315.459	86.4328	314.624	79.591	317.086	84.251	317.266	86.7868	317.555	85.4494
	315.22	98.5551	321.33	89.2073	321.68	85.6572	316.459	86.3304	315.624	79.2393	318.086	83.5554	318.266	86.7732	318.555	85.9778
	316.22	99.0773	322.33	88.8725	322.68	85.4852	317.459	85.5113	316.624	78.7082	319.086	83.5652	319.266	87.3101	319.555	85.0168
	317.22	99.1809	323.33	89.1322	323.68	85.4172	318.459	86.6718	317.624	78.9824	320.086	84.862	320.266	86.924	320.555	86.5233
	318.22	99.1782	324.33	89.3785	324.68	84.1565	319.459	87.8693	318.624	78.8213	321.086	84.3355	321.266	86.5647	321.555	85.554
	319.22	99.5489	325.33	90.1973	325.68	85.1682	320.459	86.785	319.624	78.4263	322.086	83.8345	322.266	86.2773	322.555	86.441
	320.22	99.9041	326.33	89.6184	326.68	86.5824	321.459	85.4274	320.624	80.1747	323.086	83.8817	323.266	86.6308	323.555	85.7705
	321.22	100.19	327.33	89.2349	327.68	85.5554	322.459	85.3941	321.624	79.8152	324.086	84.724	324.266	86.4126	324.555	85.7918
	322.22	99.667	328.33	89.4252	328.68	86.1106	323.459	86.7356	322.624	78.7012	325.086	84.4832	325.266	87.5932	325.555	85.6744
	323.22	100.376	329.33	89.4736	329.68	86.471	324.459	86.5905	323.624	80.7647	326.086	84.478	326.266	87.2887	326.555	85.09
	324.22	100.45	330.33	89.8939	330.68	85.8988	325.459	87.1446	324.624	79.3927	327.086	84.3947	327.266	86.6811	327.555	85.2536
	325.22	100.316	331.33	89.5157	331.68	87.0047	326.459	87.2721	325.624	79.0671	328.086	84.4825	328.266	86.6371	328.555	85.6151
	326.22	99.7625	332.33	89.3493	332.68	86.4149	327.459	87.2581	326.624	79.4792	329.086	83.9028	329.266	86.9825	329.555	85.7876
	327.22	99.6344	333.33	89.6156	333.68	86.2269	328.459	87.1754	327.624	80.01	330.086	83.0936	330.266	86.7965	330.555	85.2611
	328.22	99.567	334.33	90.6952	334.68	87.4634	329.459	87.65	328.624	79.0173	331.086	84.7173	331.266	87.0422	331.555	85.7718
	329.22	98.9112	335.33	91.2809	335.68	86.6555	330.459	87.9237	329.624	79.205	332.086	84.128	332.266	86.9833	332.555	85.3642
	330.22	100.074	336.33	90.3286	336.68	85.8729	331.459	87.2092	330.624	80.2503	333.086	84.9262	333.266	86.7852	333.555	85.5084
	331.22	100.901	337.33	89.6707	337.68	86.0931	332.459	87.4653	331.624	80.554	334.086	84.5054	334.266	86.5134	334.555	84.5909
	332.22	100.697	338.33	90.285	338.68	86.0861	333.459	86.6376	332.624	80.2243	335.086	84.8539	335.266	86.9129	335.555	87.0826
	333.22	100.317	339.33	89.9117	339.68	85.049	334.459	87.1203	333.624	80.0127	336.086	84.6201	336.266	87.1593	336.555	84.6804
	334.22	100.591	340.33	89.4237	340.68	86.4427	335.459	87.7861	334.624	79.4127	337.086	84.2955	337.266	87.4881	337.555	85.7785
	335.22	100.842	341.33	88.5955	341.68	86.2182	336.459	88.0153	335.624	80.319	338.086	84.9075	338.266	85.9587	338.555	85.7208
	336.22	100.55	342.33	90.9661	342.68	86.7953	337.459	87.8573	336.624	78.9533	339.086	84.4874	339.266	87.127	339.555	85.074
	337.22	99.7512	343.33	89.9751	343.68	87.1839	338.459	87.7862	337.624	79.7498	340.086	84.0992	340.266	87.6534	340.555	84.6891
	338.22	100.426	344.33	89.248	344.68	86.179	339.459	87.86	338.624	79.6123	341.086	84.1489	341.266	86.0424	341.555	86.279
	339.22	99.5009	345.33	90.2262	345.68	87.329	340.459	87.4901	339.624	80.3838	342.086	83.8343	342.266	87.2551	342.555	85.6029
	340.22	100.364	346.33	90.2827	346.68	86.2709	341.459	87.6126	340.624	80.0959	343.086	84.8775	343.266	87.2056	343.555	85.9826
	341.22	99.7843	347.33	89.7354	347.68	86.5141	342.459	87.7037	341.624	79.3318	344.086	85.2113	344.266	86.667	344.555	85.8136
	342.22	101.334	348.33	90.7027	348.68	86.3704	343.459	87.1961	342.624	80.0239	345.086	84.7038	345.266	86.9424	345.555	85.9334
	343.22	101.156	349.33	90.1763	349.68	86.9809	344.459	88.1043	343.624	79.6377	346.086	84.5706	346.266	85.907	346.555	86.6978
	344.22	100.593	350.33	89.9365	350.68	86.4336	345.459	86.7229	344.624	79.7271	347.086	84.4884	347.266	86.55	347.555	86.2636
	345.22	100.424	351.33	90.7819	351.68	87.2291	346.459	87.8937	345.624	78.7306	348.086	85.3022	348.266	86.8787	348.555	86.2399
	346.22	100.81	352.33	90.5248	352.68	87.9564	347.459	87.6199	346.624	79.8677	349.086	84.7263	349.266	87.0347	349.555	86.2098
	347.22	101.646	353.33	90.802	353.68	88.0891	348.459	87.4848	347.624	80.6608	350.086	85.0435	350.266	87.4755	350.555	85.3602
	348.22	100.616	354.33	91.2754	354.68	88.5166	349.459	87.722	348.624	80.1446	351.086	85.0555	351.266	86.5224	351.555	85.8184
	349.22	101.193	355.33	90.7269	355.68	87.7411	350.459	88.1313	349.624	80.2204	352.086	84.1467	352.266	87.3915	352.555	86.0201
	350.22	100.434	356.33	90.7842	356.68	88.4674	351.459	88.4757	350.624	79.5499	353.086	84.428	353.266	87.5929	353.555	86.1825
	351.22	101.322	357.33	90.7597	357.68	86.9349	352.459	87.0643	351.624	79.4612	354.086	83.836	354.266	86.8829	354.555	84.6086
	352.22	101.101	358.33	90.9581	358.68	87.2595	353.459	88.2392	352.624	79.3602	355.086	84.45	355.266	86.8877	355.555	85.8329
	353.22	100.686	359.33	91.4912	359.68	88.6192	354.459	88.7548	353.624	79.416	356.086	84.3529	356.266	87.2031	356.555	85.5988
	354.22	100.694	360.33	92.1649	360.68	88.4721	355.459	86.9866	354.624	80.4215	357.086	85.6853	357.266	87.0191	357.555	85.4432
	355.22	100.934	361.33	91.7326	361.68	87.2538	356.459	87.9397	355.624	80.1038	358.086	84.4723	358.266	87.2774	358.555	85.4977
	356.22	101.421	362.33	90.751	362.68	87.6566	357.459	87.8167	356.624	80.6665	359.086	85.4501	359.266	85.5456	359.555	85.6311
	357.22	102.482	363.33	91.3535	363.68	87.108	358.459	88.1775	357.624	79.81	360.086	84.8842	360.266	86.0897	360.555	86.3037
	358.22	101.47	364.33	91.8914	364.68	87.3739	359.459	88.5864	358.624	80.7235	361.086	85.2182	361.266	87.8308	361.555	85.8185
	359.22	101.895	365.33	90.8595	365.68	88.1442	360.459	88.1245	359.624	80.6374	362.086	85.4844	362.266	86.6783	362.555	84.8201
	360.22	101.737	366.33	90.7135	366.68	87.0717	361.459	88.1822	360.624	79.9617	363.086	83.8233	363.266	87.617	363.555	86.4884
	361.22	101.297	367.33	91.8338	367.68	87.9478	362.459	88.3264	361.624	80.56	364.086	84.6761	364.266	86.688	364.555	86.1264
	362.22	100.803	368.33	91.8457	368.68	87.6443	363.459	87.5907	362.624	80.5118	365.086	84.7245	365.266	86.6716	365.555	85.2508
	363.22	101.396	369.33	90.7645	369.68	87.444	364.459	88.9076	363.624	80.4909	366.086	84.9665	366.266	87.3761	366.555	85.628
	364.22	101.886	370.33	91.0446	370.68	86.6074	365.459	86.7075	364.624	79.9744	367.086	85.8436	367.266	86.9411	367.555	85.4619
	365.22	102.444	371.33	91.5244	371.68	87.228	366.459	88.9763	365.624	81.7575	368.086	85.0326	368.266	87.4278	368.555	86.1754
	366.22	102.341	372.33	91.1861	372.68	87.6622	367.459	87.3771	366.624	80.9738	369.086	85.5422	369.266	87.3955	369.555	85.8528
	367.22	101.559	373.33	91.7003	373.68	87.4432	368.459	88.5244	367.624	80.1595	370.086	85.5881	370.266	86.1158	370.555	85.6526
	368.22	102.276	374.33	92.0254	374.68	88.1749	369.459	88.2001	368.624	80.6556	371.086	85.764	371.266	87.2208	371.555	85.3674
	369.22	101.882	375.33	91.1823	375.68	87.7754	370.459	88.9257	369.624	80.5923	372.086	84.2833	372.266	87.7637	372.555	85.8962
	370.22	102.28	376.33	91.3755	376.68	88.1476	371.459	88.4265	370.624	80.1231	373.086	84.2607	373.266	86.7985	373.555	86.4563
	371.22	101.883	377.33	90.9754	377.68	87.5891	372.459	88.0493	371.624	80.2631	374.086	85.9026	374.266	87.0444	374.555	86.3303
	372.22	102.167	378.33	92.4372	378.68	88.7504	373.459	89.4369	372.624	80.1207	375.086	85.4224	375.266	87.0473	375.555	85.966
	373.22	102.618	379.33	91.4428	379.68	89.8813	374.459	89.3929	373.624	80.9678	376.086	85.9007	376.266	88.0235	376.555	86.7299
	374.22	102.704	380.33	92.1239	380.68	87.8096	375.459	88.4089	374.624	81.3844	377.086	85.3036	377.266	87.466	377.555	85.4413
	375.22	102.239	381.33	91.8229	381.68	89.0491	376.459	88.2028	375.624	81.0816	378.086	84.3096	378.266	87.0765	378.555	84.9946
	376.22	101.827	382.33	91.9944	382.68	88.2756	377.459	88.9237	376.624	79.7912	379.086	85.1861	379.266	87.1321	379.555	86.3721
	377.22	101.417	383.33	91.8464	383.68	87.944	378.459	88.3087	377.624	81.0056	380.086	85.6784	380.266	86.7516	380.555	85.8449
	378.22	103.49	384.33	92.1045	384.68	88.6437	379.459	89.2177	378.624	79.9697	381.086	85.2705	381.266	86.7872	381.555	86.6431
	379.22	102.562	385.33	92.0729	385.68	88.0272	380.459	89.1702	379.624	80.2802	382.086	85.0925	382.266	86.9149	382.555	86.5767
	380.22	103.407	386.33	91.4509	386.68	88.7413	381.459	89.0342	380.624	80.2053	383.086	84.7166	383.266	87.1685	383.555	87.6937
	381.22	102.415	387.33	91.7003	387.68	88.973	382.459	88.7551	381.624	80.6209	384.086	85.1768	384.266	87.1295	384.555	85.4467
	382.22	102.103	388.33	92.1917	388.68	89.1867	383.459	88.3541	382.624	80.683	385.086	85.2886	385.266	86.2181	385.555	86.3785
	383.22	103.12	389.33	91.2232	389.68	88.9408	384.459	88.8383	383.624	80.4378	386.086	84.7924	386.266	87.4817	386.555	85.9475
	384.22	102.361	390.33	92.2277	390.68	89.0466	385.459	89.3892	384.624	81.1151	387.086	85.839	387.266	87.3216	387.555	86.3965
	385.22	103.042	391.33	92.6976	391.68	88.2143	386.459	88.5948	385.624	80.2883	388.086	86.4009	388.266	86.7763	388.555	86.2634
	386.22	102.502	392.33	92.7154	392.68	89.2601	387.459	88.6108	386.624	80.2699	389.086	85.1447	389.266	87.5452	389.555	85.9945
	387.22	102.752	393.33	91.6673	393.68	88.927	388.459	89.8894	387.624	80.8547	390.086	84.5605	390.266	87.3323	390.555	85.5832
	388.22	102.846	394.33	91.9149	394.68	88.5863	389.459	89.2724	388.624	80.6317	391.086	84.7329	391.266	87.2561	391.555	86.1907
	389.22	102.606	395.33	92.3828	395.68	89.2291	390.459	88.4091	389.624	80.8244	392.086	86.4325	392.266	87.17	392.555	86.62
	390.22	103.55	396.33	93.2957	396.68	89.9357	391.459	89.1124	390.624	80.2701	393.086	84.5398	393.266	87.3503	393.555	85.6983
	391.22	103.244	397.33	92.9143	397.68	89.2447	392.459	89.2899	391.624	80.8139	394.086	85.8415	394.266	87.0596	394.555	86.6706
	392.22	103.234	398.33	92.423	398.68	89.09	393.459	89.2438	392.624	80.9486	395.086	85.4023	395.266	87.2998	395.555	85.7214
	393.22	102.999	399.33	93.48	399.68	88.6806	394.459	89.7174	393.624	80.3848	396.086	84.9563	396.266	87.2147	396.555	85.7647
	394.22	103.396	400.33	92.821	400.68	89.7163	395.459	90.3517	394.624	80.5966	397.086	85.3598	397.266	87.3911	397.555	85.8814
	395.22	103.006	401.33	92.6943	401.68	89.1732	396.459	90.1633	395.624	81.0465	398.086	85.7322	398.266	87.6217	398.555	85.3193
	396.22	103.47	402.33	92.8606	402.68	89.3614	397.459	89.8778	396.624	80.9889	399.086	86.1858	399.266	87.6856	399.555	85.7258
	397.22	102.407	403.33	92.711	403.68	89.4447	398.459	89.3655	397.624	80.9834	400.086	85.5249	400.266	87.1225	400.555	86.2793
	398.22	103.422	404.33	92.6114	404.68	89.2374	399.459	89.5646	398.624	80.8106	401.086	85.9995	401.266	86.8422	401.555	85.628
	399.22	103.465	405.33	92.9089	405.68	90.2412	400.459	90.3129	399.624	80.6912	402.086	85.1578	402.266	87.3658	402.555	86.1739
	400.22	102.571	406.33	93.2353	406.68	90.6098	401.459	89.2278	400.624	80.8257	403.086	84.9503	403.266	87.7171	403.555	86.5367
	401.22	103.206	407.33	93.7004	407.68	88.7573	402.459	90.4857	401.624	80.5966	404.086	85.5789	404.266	86.9066	404.555	86.0158
	402.22	103.348	408.33	93.6409	408.68	90.5177	403.459	89.4571	402.624	81.6669	405.086	85.9679	405.266	87.3695	405.555	86.104
	403.22	102.416	409.33	92.947	409.68	89.8226	404.459	90.3321	403.624	82.4849	406.086	85.9596	406.266	87.3059	406.555	86.4715
	404.22	103.763	410.33	93.3239	410.68	90.2214	405.459	89.5566	404.624	79.9431	407.086	85.9652	407.266	87.4293	407.555	86.3952
	405.22	104.364	411.33	93.8683	411.68	88.7797	406.459	89.0187	405.624	80.719	408.086	85.0809	408.266	86.5624	408.555	86.3259
	406.22	103.522	412.33	92.0279	412.68	90.3511	407.459	90.4734	406.624	80.9409	409.086	86.2775	409.266	87.0258	409.555	85.6944
	407.22	103.304	413.33	93.5981	413.68	89.2446	408.459	90.417	407.624	80.9311	410.086	85.5701	410.266	88.5841	410.555	86.5474
	408.22	103.687	414.33	92.6907	414.68	90.1408	409.459	90.3571	408.624	80.8474	411.086	85.584	411.266	87.3074	411.555	85.5651
	409.22	104.394	415.33	93.2085	415.68	89.2552	410.459	90.3492	409.624	80.6493	412.086	85.4695	412.266	86.5669	412.555	86.2817
	410.22	103.91	416.33	93.1949	416.68	90.1271	411.459	89.8381	410.624	81.1075	413.086	85.4138	413.266	86.8548	413.555	85.9291
	411.22	103.834	417.33	92.9723	417.68	90.2447	412.459	90.0882	411.624	81.124	414.086	86.4782	414.266	87.1423	414.555	86.2178
	412.22	103.895	418.33	94.76	418.68	90.8629	413.459	89.5165	412.624	81.3629	415.086	85.4426	415.266	87.0373	415.555	85.7172
	413.22	104.072	419.33	93.2693	419.68	90.4795	414.459	89.5485	413.624	81.6105	416.086	85.3856	416.266	87.9083	416.555	85.8139
	414.22	104.399	420.33	95.2814	420.68	90.6306	415.459	90.7171	414.624	81.9252	417.086	85.0279	417.266	87.2519	417.555	85.911
	415.22	104.427	421.33	93.6762	421.68	90.5404	416.459	90.593	415.624	80.9089	418.086	85.6698	418.266	87.5405	418.555	85.6634
	416.22	104.688	422.33	94.1571	422.68	90.878	417.459	90.1666	416.624	81.2232	419.086	84.841	419.266	87.0458	419.555	86.1187
	417.22	103.955	423.33	93.6273	423.68	90.3732	418.459	90.5343	417.624	80.9352	420.086	85.05	420.266	87.4002	420.555	86.1733
	418.22	104.711	424.33	94.5039	424.68	90.2185	419.459	90.7463	418.624	82.2192	421.086	85.648	421.266	86.1105	421.555	86.2207
	419.22	104.739	425.33	93.922	425.68	90.9151	420.459	89.9712	419.624	81.9261	422.086	85.5456	422.266	87.1323	422.555	85.2756
	420.22	104.351	426.33	94.0101	426.68	90.8959	421.459	90.3646	420.624	81.1315	423.086	85.798	423.266	87.347	423.555	85.6007
	421.22	103.991	427.33	94.1478	427.68	89.9375	422.459	90.2838	421.624	81.3154	424.086	85.834	424.266	87.1488	424.555	85.3916
	422.22	104.421	428.33	93.7248	428.68	90.2892	423.459	89.9461	422.624	81.6131	425.086	85.6376	425.266	87.6321	425.555	85.5218
	423.22	105.035	429.33	94.01	429.68	90.5791	424.459	90.8393	423.624	81.8005	426.086	85.8744	426.266	87.4425	426.555	86.7141
	424.22	104.725	430.33	93.6499	430.68	90.3534	425.459	91.437	424.624	82.7981	427.086	86.3636	427.266	87.0034	427.555	85.8799
	425.22	105.617	431.33	94.0375	431.68	91.1406	426.459	89.7422	425.624	81.9468	428.086	86.0879	428.266	87.7789	428.555	85.7352
	426.22	105.152	432.33	94.2004	432.68	91.1974	427.459	91.0651	426.624	81.5397	429.086	85.4396	429.266	87.1219	429.555	85.9315
	427.22	105.493	433.33	93.5821	433.68	90.436	428.459	90.9766	427.624	81.4107	430.086	85.8496	430.266	87.2286	430.555	86.3285
	428.22	104.788	434.33	93.921	434.68	90.8178	429.459	89.9519	428.624	81.6494	431.086	85.7526	431.266	86.8167	431.555	86.8618
	429.22	105.425	435.33	94.3661	435.68	90.8954	430.459	90.8111	429.624	81.8073	432.086	85.906	432.266	88.1886	432.555	85.539
	430.22	104.607	436.33	93.7215	436.68	91.2328	431.459	90.2116	430.624	81.0011	433.086	85.7107	433.266	87.266	433.555	85.7949
	431.22	104.852	437.33	94.453	437.68	89.8767	432.459	90.7125	431.624	81.175	434.086	85.7354	434.266	87.8656	434.555	86.7347
	432.22	104.521	438.33	94.3467	438.68	91.3072	433.459	91.4708	432.624	81.6732	435.086	86.2252	435.266	87.9654	435.555	86.1991
	433.22	105.541	439.33	95.308	439.68	90.2369	434.459	91.2385	433.624	81.6847	436.086	86.2514	436.266	87.6887	436.555	86.0326
	434.22	105.154	440.33	93.7019	440.68	90.9254	435.459	90.8119	434.624	81.856	437.086	85.9582	437.266	87.7108	437.555	86.2346
	435.22	104.947	441.33	95.0382	441.68	91.191	436.459	91.5438	435.624	80.9325	438.086	86.0405	438.266	88.0164	438.555	85.628
	436.22	105.114	442.33	94.8902	442.68	90.4469	437.459	90.8254	436.624	81.5071	439.086	86.5444	439.266	87.6277	439.555	86.4408
	437.22	105.894	443.33	94.4173	443.68	91.6538	438.459	90.7953	437.624	81.5476	440.086	85.7119	440.266	87.1896	440.555	85.3545
	438.22	105.197	444.33	95.5554	444.68	91.181	439.459	90.6217	438.624	81.4367	441.086	85.9885	441.266	86.5216	441.555	85.8406
	439.22	104.703	445.33	94.8769	445.68	91.0331	440.459	91.5169	439.624	82.0456	442.086	85.7616	442.266	87.1034	442.555	86.0159
	440.22	105.624	446.33	95.4102	446.68	91.1759	441.459	91.8977	440.624	81.0935	443.086	86.2182	443.266	86.5484	443.555	85.3787
	441.22	106.21	447.33	94.8351	447.68	91.3346	442.459	91.2264	441.624	81.8661	444.086	86.1745	444.266	87.0801	444.555	85.9956
	442.22	104.582	448.33	94.6006	448.68	90.8441	443.459	90.7428	442.624	82.6097	445.086	85.8389	445.266	87.0125	445.555	85.583
	443.22	105.21	449.33	94.4381	449.68	91.0855	444.459	91.2398	443.624	81.2345	446.086	85.6784	446.266	88.0967	446.555	86.3652
	444.22	105.604	450.33	94.4614	450.68	90.9441	445.459	92.2011	444.624	82.1278	447.086	86.2707	447.266	87.2895	447.555	86.0719
	445.22	106.799	451.33	94.3993	451.68	91.3164	446.459	91.5401	445.624	81.6281	448.086	85.8219	448.266	86.8343	448.555	86.7681
	446.22	106.518	452.33	94.565	452.68	91.4771	447.459	91.4427	446.624	81.9156	449.086	86.4076	449.266	86.7864	449.555	85.6621
	447.22	105.037	453.33	94.7384	453.68	91.5907	448.459	90.3759	447.624	81.76	450.086	85.8429	450.266	88.0682	450.555	86.4084
	448.22	104.334	454.33	95.0547	454.68	91.7413	449.459	90.5685	448.624	80.9861	451.086	86.3367	451.266	87.3224	451.555	86.5405
	449.22	106.417	455.33	94.3155	455.68	92.0955	450.459	91.2231	449.624	81.6118	452.086	86.8541	452.266	87.5051	452.555	86.5691
	450.22	107.169	456.33	95.4939	456.68	91.4993	451.459	91.9625	450.624	82.0421	453.086	86.1002	453.266	88.1548	453.555	86.4183
	451.22	106.352	457.33	94.3261	457.68	92.3056	452.459	92.2253	451.624	82.2811	454.086	85.4299	454.266	87.7213	454.555	86.2371
	452.22	105.678	458.33	95.7119	458.68	91.4072	453.459	91.0628	452.624	81.981	455.086	86.9619	455.266	87.8334	455.555	86.3128
	453.22	105.8	459.33	94.8273	459.68	91.7473	454.459	91.3669	453.624	82.63	456.086	86.335	456.266	87.295	456.555	86.5991
	454.22	106.733	460.33	94.6229	460.68	91.0671	455.459	91.5154	454.624	81.2738	457.086	86.2266	457.266	87.92	457.555	86.108
	455.22	105.744	461.33	95.6983	461.68	91.6168	456.459	92.232	455.624	81.3397	458.086	86.708	458.266	87.2092	458.555	85.6593
	456.22	105.766	462.33	94.6348	462.68	91.7498	457.459	91.6911	456.624	81.6289	459.086	86.2725	459.266	87.6922	459.555	86.8809
	457.22	105.885	463.33	95.2845	463.68	91.3588	458.459	91.7437	457.624	82.3661	460.086	86.7448	460.266	86.2814	460.555	85.5873
	458.22	105.24	464.33	95.3552	464.68	92.4474	459.459	92.0982	458.624	82.0004	461.086	86.7533	461.266	87.5548	461.555	86.0072
	459.22	106.774	465.33	95.1318	465.68	92.455	460.459	91.5376	459.624	81.7475	462.086	86.0784	462.266	87.8612	462.555	86.5134
	460.22	105.891	466.33	95.9898	466.68	92.1054	461.459	92.2858	460.624	82.9237	463.086	86.8302	463.266	87.9588	463.555	85.3952
	461.22	106.521	467.33	94.8987	467.68	91.9743	462.459	91.4742	461.624	82.0551	464.086	86.0768	464.266	86.597	464.555	86.3009
	462.22	105.706	468.33	95.9331	468.68	92.2519	463.459	91.836	462.624	80.8344	465.086	86.9007	465.266	87.4097	465.555	85.0644
	463.22	106.985	469.33	94.748	469.68	91.8436	464.459	92.2431	463.624	82.5461	466.086	86.4701	466.266	87.3198	466.555	85.1066
	464.22	106.667	470.33	95.5516	470.68	92.3918	465.459	91.762	464.624	82.284	467.086	87.2622	467.266	88.0933	467.555	86.4217
	465.22	106.469	471.33	95.4169	471.68	92.5775	466.459	93.1824	465.624	82.6151	468.086	86.8291	468.266	87.4976	468.555	86.146
	466.22	106.719	472.33	95.1665	472.68	91.66	467.459	90.9902	466.624	82.1383	469.086	85.9069	469.266	87.3347	469.555	85.6634
	467.22	105.342	473.33	95.1029	473.68	91.4492	468.459	92.4843	467.624	82.0104	470.086	86.8135	470.266	87.5873	470.555	86.1364
	468.22	106.47	474.33	96.1983	474.68	92.913	469.459	93.1663	468.624	82.2144	471.086	87.299	471.266	87.9042	471.555	86.3687
	469.22	106.639	475.33	94.8498	475.68	90.9761	470.459	92.7258	469.624	82.4882	472.086	86.6508	472.266	87.1011	472.555	86.4984
	470.22	106.227	476.33	95.6415	476.68	93.1949	471.459	91.9268	470.624	82.6112	473.086	87.0219	473.266	87.1811	473.555	87.2979
	471.22	107.186	477.33	96.1313	477.68	91.6998	472.459	91.7391	471.624	82.3608	474.086	87.3859	474.266	88.1458	474.555	85.548
	472.22	106.081	478.33	95.689	478.68	94.1354	473.459	93.0311	472.624	81.552	475.086	87.2154	475.266	87.118	475.555	86.8528
	473.22	107.31	479.33	96.0873	479.68	92.5789	474.459	92.4151	473.624	82.6737	476.086	87.2568	476.266	87.6471	476.555	85.5683
	474.22	107.5	480.33	96.1247	480.68	94.27	475.459	92.0595	474.624	83.1672	477.086	86.3409	477.266	86.9121	477.555	86.0183
	475.22	106.413	481.33	95.7907	481.68	92.0657	476.459	91.6292	475.624	82.3054	478.086	86.4579	478.266	87.4796	478.555	86.2776
	476.22	107.058	482.33	95.3311	482.68	92.2893	477.459	91.4866	476.624	81.7509	479.086	86.6928	479.266	88.4342	479.555	86.5249
	477.22	106.902	483.33	95.8119	483.68	93.9872	478.459	92.3359	477.624	82.6279	480.086	87.3274	480.266	87.5574	480.555	85.3865
	478.22	106.623	484.33	95.7785	484.68	93.6163	479.459	93.493	478.624	82.163	481.086	85.7307	481.266	86.9674	481.555	86.6812
	479.22	106.391	485.33	96.6754	485.68	92.6039	480.459	92.012	479.624	82.4355	482.086	85.7876	482.266	87.4353	482.555	86.1027
	480.22	107.725	486.33	96.4013	486.68	92.5351	481.459	93.2337	480.624	82.3765	483.086	86.3937	483.266	86.9838	483.555	85.9452
	481.22	107.095	487.33	96.1035	487.68	92.7537	482.459	91.6723	481.624	82.0626	484.086	87.4289	484.266	87.5726	484.555	86.3525
	482.22	107.791	488.33	96.7663	488.68	92.7567	483.459	91.9543	482.624	82.5868	485.086	86.8405	485.266	87.7533	485.555	87.2018
	483.22	107.068	489.33	95.6721	489.68	92.4584	484.459	92.3887	483.624	81.7643	486.086	86.9213	486.266	86.6862	486.555	86.2301
	484.22	106.448	490.33	96.3792	490.68	93.6462	485.459	92.1335	484.624	82.3144	487.086	86.5708	487.266	86.9177	487.555	86.3197
	485.22	106.64	491.33	96.7679	491.68	92.9089	486.459	93.1326	485.624	82.2402	488.086	86.9011	488.266	87.5453	488.555	85.6318
	486.22	107.37	492.33	96.3458	492.68	93.1596	487.459	92.9304	486.624	83.4336	489.086	87.6602	489.266	87.0776	489.555	85.6271
	487.22	107.094	493.33	96.6508	493.68	93.2705	488.459	92.6664	487.624	82.8883	490.086	87.9684	490.266	87.5046	490.555	86.5401
	488.22	107.126	494.33	96.8887	494.68	93.8272	489.459	92.92	488.624	82.4807	491.086	86.8845	491.266	87.5882	491.555	86.2753
	489.22	107.244	495.33	96.8228	495.68	93.8381	490.459	92.5649	489.624	83.3571	492.086	87.2212	492.266	88.1524	492.555	86.1261
	490.22	107.202	496.33	96.4464	496.68	93.4496	491.459	93.0455	490.624	82.8267	493.086	87.0014	493.266	88.5568	493.555	85.5686
	491.22	106.728	497.33	96.0011	497.68	92.6516	492.459	92.3981	491.624	83.0736	494.086	86.7701	494.266	87.8888	494.555	85.782
	492.22	108.66	498.33	95.7822	498.68	92.6719	493.459	92.7022	492.624	82.7444	495.086	87.8041	495.266	87.1404	495.555	86.2147
	493.22	108.051	499.33	96.3723	499.68	93.3972	494.459	92.5581	493.624	83.2801	496.086	85.9455	496.266	87.1551	496.555	86.0971
	494.22	107.882	500.33	96.8564	500.68	93.071	495.459	93.018	494.624	83.0262	497.086	87.2272	497.266	87.1965	497.555	86.4437
	495.22	108.098	501.33	96.395	501.68	93.6236	496.459	93.5632	495.624	83.6961	498.086	88.056	498.266	86.7527	498.555	87.0916
	496.22	107.45	502.33	96.3573	502.68	93.3301	497.459	94.0994	496.624	81.9163	499.086	86.9291	499.266	87.4113	499.555	86.5589
	497.22	107.168	503.33	96.5355	503.68	93.3097	498.459	93.0895	497.624	83.9412	500.086	87.0835	500.266	87.3155	500.555	86.488
	498.22	107.241	504.33	97.5422	504.68	93.4573	499.459	93.1797	498.624	83.1113	501.086	86.6217	501.266	86.7836	501.555	85.5981
	499.22	107.883	505.33	96.537	505.68	93.5693	500.459	92.8019	499.624	82.2113	502.086	86.8761	502.266	87.2604	502.555	85.5116
	500.22	108.119	506.33	96.5984	506.68	93.709	501.459	93.8282	500.624	83.1121	503.086	86.9507	503.266	87.136	503.555	86.1193
	501.22	107.171	507.33	97.3061	507.68	94.2306	502.459	94.2122	501.624	82.9261	504.086	84.9503	504.266	87.0033	504.555	86.4244
	502.22	107.875	508.33	96.5453	508.68	93.0159	503.459	92.6268	502.624	83.2798	505.086	86.7636	505.266	87.6208	505.555	86.6268
	503.22	108.178	509.33	96.232	509.68	93.9093	504.459	93.2078	503.624	82.9747	506.086	87.9038	506.266	87.8554	506.555	86.344
	504.22	107.548	510.33	97.0963	510.68	93.2556	505.459	92.7905	504.624	83.6465	507.086	87.4172	507.266	88.3105	507.555	85.5901
	505.22	107.236	511.33	97.5705	511.68	94.3126	506.459	93.4085	505.624	82.8199	508.086	87.2006	508.266	87.2836	508.555	86.1859
	506.22	107.437	512.33	96.8991	512.68	95.4099	507.459	93.3628	506.624	83.7872	509.086	86.4951	509.266	87.6205	509.555	86.5959
	507.22	108.761	513.33	97.3099	513.68	94.7003	508.459	93.6627	507.624	83.2054	510.086	87.5326	510.266	86.8558	510.555	86.3879
	508.22	108.073	514.33	98.4396	514.68	93.7258	509.459	92.5179	508.624	82.8532	511.086	86.6801	511.266	86.8537	511.555	86.6182
	509.22	106.886	515.33	97.7381	515.68	93.6071	510.459	92.8486	509.624	82.8518	512.086	87.0342	512.266	87.6822	512.555	87.1126
	510.22	107.444	516.33	97.3586	516.68	94.3142	511.459	92.8558	510.624	83.2343	513.086	86.1513	513.266	87.0961	513.555	86.1927
	511.22	107.697	517.33	97.3964	517.68	94.9327	512.459	93.5011	511.624	83.1651	514.086	86.8507	514.266	87.6161	514.555	86.1881
	512.22	106.324	518.33	97.8824	518.68	94.445	513.459	93.1268	512.624	82.5704	515.086	87.3271	515.266	88.1627	515.555	86.1407
	513.22	108.413	519.33	97.81	519.68	93.756	514.459	92.9148	513.624	82.0774	516.086	87.9077	516.266	87.5717	516.555	86.1529
	514.22	108.226	520.33	97.3776	520.68	94.9101	515.459	93.9495	514.624	82.7856	517.086	87.3795	517.266	86.7828	517.555	85.9302
	515.22	109.338	521.33	97.4344	521.68	94.2296	516.459	93.1884	515.624	82.6787	518.086	86.4203	518.266	86.7474	518.555	86.2927
	516.22	109.514	522.33	97.9386	522.68	94.1882	517.459	93.0903	516.624	82.5805	519.086	87.2412	519.266	87.284	519.555	87.0124
	517.22	107.964	523.33	96.5912	523.68	94.3786	518.459	94.0311	517.624	83.0836	520.086	86.6122	520.266	87.4048	520.555	85.7593
	518.22	108.053	524.33	96.5182	524.68	93.7656	519.459	93.248	518.624	82.9416	521.086	87.6943	521.266	87.3902	521.555	85.684
	519.22	107.965	525.33	97.492	525.68	94.3537	520.459	93.7451	519.624	83.208	522.086	87.7105	522.266	87.0227	522.555	86.3242
	520.22	108.473	526.33	98.0841	526.68	94.4541	521.459	93.2818	520.624	83.6876	523.086	87.4625	523.266	88.0246	523.555	85.804
	521.22	109.153	527.33	97.7125	527.68	94.0728	522.459	92.3722	521.624	83.0536	524.086	86.1491	524.266	87.4206	524.555	86.055
	522.22	107.715	528.33	97.3021	528.68	93.7091	523.459	94.142	522.624	83.7749	525.086	86.3355	525.266	87.1679	525.555	87.2272
	523.22	108.137	529.33	98.0375	529.68	94.8402	524.459	93.8296	523.624	83.7342	526.086	87.4633	526.266	87.119	526.555	85.6111
	524.22	108.943	530.33	97.7085	530.68	93.489	525.459	93.3534	524.624	84.1763	527.086	86.902	527.266	86.7436	527.555	86.7026
	525.22	108.138	531.33	99.117	531.68	95.3713	526.459	94.4731	525.624	83.0211	528.086	86.1352	528.266	86.9645	528.555	86.5277
	526.22	109.194	532.33	98.2346	532.68	94.1675	527.459	93.0094	526.624	83.0757	529.086	86.9189	529.266	87.2172	529.555	86.3327
	527.22	107.506	533.33	98.183	533.68	95.2683	528.459	93.3894	527.624	83.2972	530.086	87.3828	530.266	87.6237	530.555	85.8739
	528.22	108.044	534.33	97.464	534.68	94.6543	529.459	94.4611	528.624	84.1384	531.086	87.6153	531.266	87.3793	531.555	86.4038
	529.22	107.856	535.33	98.5706	535.68	94.29	530.459	94.2713	529.624	83.0656	532.086	86.7982	532.266	87.6894	532.555	84.889
	530.22	108.404	536.33	97.1317	536.68	95.6171	531.459	94.0976	530.624	83.9877	533.086	87.9984	533.266	86.7744	533.555	86.1621
	531.22	108.988	537.33	97.6701	537.68	95.5416	532.459	93.4414	531.624	83.4515	534.086	87.2438	534.266	87.6939	534.555	85.7152
	532.22	108.324	538.33	98.1922	538.68	95.7102	533.459	94.4063	532.624	83.4251	535.086	87.5656	535.266	86.8319	535.555	87.8361
	533.22	108.597	539.33	98.5446	539.68	95.1417	534.459	94.1625	533.624	84.0272	536.086	86.9944	536.266	87.6911	536.555	85.424
	534.22	108.27	540.33	98.2923	540.68	94.7335	535.459	94.0881	534.624	82.7309	537.086	87.9226	537.266	87.1207	537.555	85.0575
	535.22	108.82	541.33	97.843	541.68	96.1597	536.459	93.7945	535.624	83.7906	538.086	86.9112	538.266	87.0536	538.555	86.1232
	536.22	108.98	542.33	98.5111	542.68	95.2913	537.459	93.6209	536.624	83.2776	539.086	87.8091	539.266	87.4516	539.555	85.428
	537.22	108.209	543.33	98.0781	543.68	95.3125	538.459	94.0092	537.624	83.8784	540.086	87.2841	540.266	87.0135	540.555	86.1598
	538.22	108.642	544.33	98.4298	544.68	95.2449	539.459	94.1635	538.624	84.0355	541.086	87.4699	541.266	86.3629	541.555	86.0747
	539.22	109.656	545.33	98.9132	545.68	94.9393	540.459	93.703	539.624	83.6707	542.086	87.837	542.266	87.8408	542.555	86.7722
	540.22	108.913	546.33	98.0879	546.68	95.3566	541.459	94.2718	540.624	83.9781	543.086	88.1711	543.266	87.1743	543.555	86.5814
	541.22	109.033	547.33	98.2548	547.68	94.9819	542.459	94.3753	541.624	83.9966	544.086	86.9358	544.266	87.2105	544.555	86.7673
	542.22	109.565	548.33	98.6384	548.68	96.6096	543.459	94.3032	542.624	83.7102	545.086	87.1762	545.266	86.9087	545.555	86.8555
	543.22	109.155	549.33	97.9595	549.68	94.2236	544.459	93.9565	543.624	83.7324	546.086	87.393	546.266	87.9722	546.555	86.2701
	544.22	109.024	550.33	98.3319	550.68	95.4528	545.459	95.221	544.624	83.4412	547.086	87.3541	547.266	87.5513	547.555	86.3914
	545.22	109.981	551.33	98.2697	551.68	94.7942	546.459	94.4833	545.624	83.4293	548.086	87.1026	548.266	87.7882	548.555	86.7707
	546.22	109.522	552.33	98.4685	552.68	94.9884	547.459	94.2956	546.624	83.3609	549.086	88.1441	549.266	86.6971	549.555	85.7896
	547.22	108.397	553.33	99.4914	553.68	96.4094	548.459	92.8352	547.624	82.7706	550.086	87.6079	550.266	88.2959	550.555	85.2069
	548.22	109.076	554.33	97.7091	554.68	94.9508	549.459	93.1117	548.624	84.6282	551.086	87.5421	551.266	87.6379	551.555	85.0328
	549.22	109.935	555.33	99.2324	555.68	95.5847	550.459	93.7744	549.624	84.4311	552.086	87.9402	552.266	87.19	552.555	86.5461
	550.22	108.622	556.33	99.1129	556.68	95.3638	551.459	94.282	550.624	84.0906	553.086	86.9757	553.266	87.4515	553.555	85.4075
	551.22	109.862	557.33	99.9669	557.68	94.6512	552.459	94.7902	551.624	83.6884	554.086	87.9945	554.266	87.207	554.555	85.7681
	552.22	110.199	558.33	99.0253	558.68	95.6259	553.459	94.5787	552.624	84.5601	555.086	87.2727	555.266	86.9333	555.555	86.5369
	553.22	109.127	559.33	99.0079	559.68	95.6613	554.459	94.2035	553.624	84.3544	556.086	87.6759	556.266	87.9199	556.555	87.3648
	554.22	109.51	560.33	98.7561	560.68	95.5965	555.459	94.8374	554.624	84.3604	557.086	87.7622	557.266	87.9317	557.555	86.4372
	555.22	109.84	561.33	98.7488	561.68	95.0371	556.459	94.577	555.624	83.7325	558.086	86.3428	558.266	87.8092	558.555	86.4087
	556.22	109.316	562.33	99.0495	562.68	94.9252	557.459	95.2264	556.624	84.2733	559.086	87.7192	559.266	86.8078	559.555	86.3306
	557.22	110.374	563.33	98.9268	563.68	95.711	558.459	94.9637	557.624	84.1792	560.086	86.8156	560.266	87.8065	560.555	86.8697
	558.22	109.246	564.33	99.3865	564.68	95.2137	559.459	94.9349	558.624	84.4412	561.086	87.0659	561.266	87.157	561.555	86.0701
	559.22	110.281	565.33	99.9449	565.68	96.1716	560.459	94.6591	559.624	84.5915	562.086	87.7979	562.266	87.3561	562.555	86.3973
	560.22	109.776	566.33	99.1005	566.68	95.8819	561.459	95.555	560.624	84.2024	563.086	87.173	563.266	86.9863	563.555	85.9941
	561.22	110.117	567.33	98.5374	567.68	95.3585	562.459	95.2188	561.624	84.2515	564.086	87.4365	564.266	87.022	564.555	86.2752
	562.22	110.701	568.33	99.436	568.68	95.4528	563.459	93.9103	562.624	84.7423	565.086	87.2403	565.266	86.7921	565.555	86.0057
	563.22	109.423	569.33	99.1578	569.68	96.5872	564.459	95.3271	563.624	84.1553	566.086	86.9187	566.266	86.8065	566.555	85.9548
	564.22	110.672	570.33	99.5936	570.68	96.4672	565.459	94.388	564.624	84.3236	567.086	87.4462	567.266	87.5052	567.555	86.189
	565.22	109.518	571.33	98.4221	571.68	95.628	566.459	94.8094	565.624	84.0182	568.086	87.9584	568.266	86.8446	568.555	86.2169
	566.22	110.12	572.33	99.0754	572.68	96.2708	567.459	95.2808	566.624	85.2555	569.086	87.8816	569.266	86.7871	569.555	86.462
	567.22	109.013	573.33	98.3973	573.68	96.7991	568.459	95.3529	567.624	83.5556	570.086	87.6133	570.266	87.392	570.555	85.4791
	568.22	110.035	574.33	99.4938	574.68	97.0944	569.459	94.8733	568.624	84.6081	571.086	87.5761	571.266	87.5606	571.555	85.8089
	569.22	109.734	575.33	100.151	575.68	96.2361	570.459	94.278	569.624	84.8691	572.086	87.1929	572.266	87.3673	572.555	86.6161
	570.22	110.703	576.33	99.8455	576.68	95.6696	571.459	95.3092	570.624	83.8878	573.086	87.1556	573.266	86.9039	573.555	86.0108
	571.22	109.342	577.33	98.7208	577.68	96.7846	572.459	95.3109	571.624	84.2653	574.086	87.287	574.266	87.1544	574.555	85.6081
	572.22	111.568	578.33	98.7507	578.68	96.3832	573.459	94.3251	572.624	84.7979	575.086	87.5877	575.266	87.1641	575.555	85.5926
	573.22	110.716	579.33	98.1011	579.68	96.8188	574.459	95.3591	573.624	85.925	576.086	87.7452	576.266	86.6611	576.555	85.355
	574.22	109.34	580.33	98.5977	580.68	95.7243	575.459	95.4919	574.624	84.1045	577.086	88.268	577.266	86.9923	577.555	85.626
	575.22	110.016	581.33	98.2937	581.68	95.9546	576.459	94.6004	575.624	83.8175	578.086	87.9063	578.266	88.2117	578.555	85.2656
	576.22	109.924	582.33	98.2083	582.68	96.0276	577.459	94.7675	576.624	84.6622	579.086	88.2376	579.266	88.1058	579.555	86.7555
	577.22	110.27	583.33	98.126	583.68	96.131	578.459	94.7375	577.624	84.7288	580.086	87.2468	580.266	87.9673	580.555	86.029
	578.22	109.888	584.33	98.4027	584.68	96.5099	579.459	96.042	578.624	83.8433	581.086	87.7799	581.266	87.5337	581.555	86.0663
	579.22	110.191	585.33	97.6238	585.68	96.9465	580.459	95.6224	579.624	84.9729	582.086	87.3507	582.266	86.935	582.555	86.1166
	580.22	111.106	586.33	99.2924	586.68	96.7291	581.459	96.3375	580.624	83.9516	583.086	87.4506	583.266	87.471	583.555	86.4265
	581.22	110.798	587.33	97.6779	587.68	97.1252	582.459	95.21	581.624	84.4639	584.086	88.4249	584.266	87.9465	584.555	86.4318
	582.22	110.852	588.33	98.0282	588.68	96.4494	583.459	94.146	582.624	85.5044	585.086	87.6991	585.266	86.8085	585.555	86.5332
	583.22	109.871	589.33	98.408	589.68	96.1619	584.459	95.3083	583.624	85.0516	586.086	87.0771	586.266	88.0299	586.555	84.8424
	584.22	111.271	590.33	98.4607	590.68	96.7226	585.459	94.857	584.624	84.8779	587.086	87.7363	587.266	87.1366	587.555	86.3469
	585.22	111.016	591.33	99.0641	591.68	97.0121	586.459	94.3539	585.624	84.1536	588.086	87.217	588.266	87.8323	588.555	85.8048
	586.22	109.625	592.33	99.017	592.68	97.4877	587.459	95.5999	586.624	84.9377	589.086	87.3608	589.266	88.0875	589.555	86.1763
	587.22	110.443	593.33	98.4884	593.68	96.863	588.459	96.1587	587.624	83.8991	590.086	87.7719	590.266	87.1444	590.555	86.1667
	588.22	110.425	594.33	99.7612	594.68	95.9847	589.459	94.4333	588.624	84.5188	591.086	88.1525	591.266	87.607	591.555	85.9885
	589.22	110.827	595.33	98.6176	595.68	96.2497	590.459	94.9448	589.624	84.9273	592.086	87.9012	592.266	87.9207	592.555	86.2198
	590.22	110.792	596.33	99.4831	596.68	96.5852	591.459	95.542	590.624	84.6074	593.086	88.2805	593.266	87.9538	593.555	86.3018
	591.22	110.376	597.33	99.7946	597.68	97.305	592.459	94.9393	591.624	83.6965	594.086	87.1347	594.266	87.442	594.555	85.8172
	592.22	111.18	598.33	99.191	598.68	97.9052	593.459	95.8222	592.624	84.6262	595.086	88.6242	595.266	87.9025	595.555	86.1935
	593.22	111.126	599.33	99.0546	599.68	97.521	594.459	95.1934	593.624	85.0449	596.086	87.4397	596.266	88.0898	596.555	86.4412
	594.22	110.219	600.33	98.3321	600.68	97.1007	595.459	95.5071	594.624	84.7461	597.086	88.2213	597.266	88.0754	597.555	86.2383
	595.22	111.592	601.33	99.7189	601.68	97.3116	596.459	95.7388	595.624	83.9177	598.086	87.6848	598.266	87.6815	598.555	85.535
	596.22	110.938	602.33	99.1681	602.68	96.2307	597.459	94.6393	596.624	84.8515	599.086	87.4188	599.266	86.979	599.555	85.6488
	597.22	111.407	603.33	99.4041	603.68	96.7416	598.459	94.3811	597.624	84.5749	600.086	88.6544	600.266	88.5141	600.555	85.6899
	598.22	111.377	604.33	99.7004	604.68	96.8418	599.459	94.659	598.624	84.3762	601.086	88.9341	601.266	87.5482	601.555	86.2477
	599.22	111.054	605.33	98.6424	605.68	97.0896	600.459	95.2929	599.624	85.0206	602.086	87.2136	602.266	87.8042	602.555	86.6437
	600.22	111.19	606.33	99.9144	606.68	97.5664	601.459	96.0903	600.624	84.5424	603.086	87.7642	603.266	87.5093	603.555	86.0078
	601.22	112.269	607.33	99.075	607.68	96.9635	602.459	96.4357	601.624	85.1889	604.086	87.6522	604.266	87.2376	604.555	86.045
	602.22	110.384	608.33	99.3936	608.68	97.4835	603.459	96.1209	602.624	84.5064	605.086	88.0779	605.266	87.2109	605.555	86.5519
	603.22	111.309	609.33	98.6966	609.68	97.0336	604.459	96.2253	603.624	85.4532	606.086	89.2274	606.266	87.6038	606.555	86.2166
	604.22	111.035	610.33	99.7451	610.68	96.1249	605.459	96.9021	604.624	84.8071	607.086	87.6926	607.266	87.6922	607.555	85.8688
	605.22	110.456	611.33	99.5421	611.68	98.1566	606.459	96.0557	605.624	84.3879	608.086	88.3981	608.266	88.3059	608.555	86.0745
	606.22	112.423	612.33	99.4171	612.68	97.2017	607.459	95.4664	606.624	84.9049	609.086	89.1462	609.266	88.0102	609.555	86.3164
	607.22	111.033	613.33	99.4413	613.68	97.2346	608.459	95.4534	607.624	84.0397	610.086	88.0745	610.266	87.7028	610.555	86.4091
	608.22	111.235	614.33	98.7326	614.68	97.5779	609.459	95.5141	608.624	83.9928	611.086	88.1661	611.266	87.7025	611.555	85.5912
	609.22	111.803	615.33	99.8031	615.68	97.1588	610.459	95.8453	609.624	84.6268	612.086	87.9562	612.266	87.4076	612.555	85.8289
	610.22	110.771	616.33	99.9704	616.68	97.4781	611.459	96.0454	610.624	84.7294	613.086	87.772	613.266	87.835	613.555	85.8986
	611.22	112.209	617.33	99.6774	617.68	97.3515	612.459	95.2545	611.624	83.726	614.086	88.8328	614.266	87.9586	614.555	85.165
	612.22	112.91	618.33	100.007	618.68	97.4531	613.459	95.542	612.624	85.1169	615.086	87.056	615.266	87.5511	615.555	86.0547
	613.22	110.726	619.33	100.095	619.68	97.8345	614.459	95.9115	613.624	84.3339	616.086	88.395	616.266	88.1536	616.555	86.0501
	614.22	111.02	620.33	99.5807	620.68	97.4354	615.459	95.7469	614.624	85.3747	617.086	88.9411	617.266	87	617.555	86.5086
	615.22	112.301	621.33	99.6766	621.68	97.8613	616.459	96.4203	615.624	84.0759	618.086	88.875	618.266	87.975	618.555	86.7704
	616.22	111.463	622.33	99.1322	622.68	97.7023	617.459	96.5359	616.624	85.2249	619.086	87.2499	619.266	87.7242	619.555	87.0079
	617.22	110.018	623.33	100.595	623.68	97.771	618.459	96.5393	617.624	84.7969	620.086	88.8507	620.266	87.1791	620.555	86.6187
	618.22	111.718	624.33	100.95	624.68	97.5138	619.459	95.1622	618.624	85.4865	621.086	88.1267	621.266	87.2582	621.555	86.5271
	619.22	112.008	625.33	100.273	625.68	98.4975	620.459	94.7958	619.624	84.8687	622.086	88.8951	622.266	87.3137	622.555	86.6567
	620.22	111.373	626.33	99.5032	626.68	97.5362	621.459	95.747	620.624	84.7931	623.086	87.9366	623.266	88.1471	623.555	86.3314
	621.22	111.801	627.33	99.8138	627.68	97.9094	622.459	96.4742	621.624	84.5299	624.086	88.4687	624.266	87.0943	624.555	85.5948
	622.22	112.243	628.33	100.271	628.68	98.1595	623.459	97.2654	622.624	85.7975	625.086	89.2723	625.266	87.5939	625.555	85.5302
	623.22	111.836	629.33	99.1157	629.68	98.2317	624.459	96.8842	623.624	85.1099	626.086	88.7248	626.266	87.3353	626.555	86.4435
	624.22	111.892	630.33	100.347	630.68	98.1967	625.459	97.3765	624.624	84.6378	627.086	88.7583	627.266	88.0713	627.555	86.5295
	625.22	111.679	631.33	99.8528	631.68	98.0134	626.459	96.778	625.624	85.4081	628.086	88.8642	628.266	87.1577	628.555	86.4129
	626.22	112.176	632.33	100.715	632.68	97.7517	627.459	96.2315	626.624	84.9936	629.086	88.5889	629.266	86.7346	629.555	85.8182
	627.22	112.133	633.33	99.2421	633.68	98.7848	628.459	96.4601	627.624	85.4309	630.086	88.8161	630.266	87.6307	630.555	86.2951
	628.22	111.741	634.33	99.8246	634.68	98.1818	629.459	95.991	628.624	84.9425	631.086	88.8437	631.266	88.3758	631.555	86.024
	629.22	112.076	635.33	99.4193	635.68	98.9341	630.459	95.8077	629.624	84.4951	632.086	88.5474	632.266	87.9213	632.555	85.5847
	630.22	111.118	636.33	100.645	636.68	97.4163	631.459	95.8126	630.624	85.4984	633.086	87.9239	633.266	87.4475	633.555	86.1209
	631.22	112.556	637.33	100.057	637.68	98.4736	632.459	96.2903	631.624	85.9211	634.086	88.6718	634.266	87.3238	634.555	85.6037
	632.22	113.137	638.33	99.3461	638.68	98.2008	633.459	96.9769	632.624	85.005	635.086	88.9256	635.266	87.2365	635.555	85.7503
	633.22	112.867	639.33	101.337	639.68	97.609	634.459	96.5686	633.624	84.9279	636.086	88.5667	636.266	88.1408	636.555	86.2467
	634.22	112.425	640.33	100.748	640.68	98.3481	635.459	96.2582	634.624	85.7434	637.086	88.8419	637.266	87.988	637.555	85.6829
	635.22	111.469	641.33	100.194	641.68	98.5908	636.459	96.7045	635.624	84.7591	638.086	88.7329	638.266	87.5725	638.555	86.6096
	636.22	112.073	642.33	101.307	642.68	98.8862	637.459	97.1187	636.624	84.7579	639.086	88.6405	639.266	88.3455	639.555	86.4803
	637.22	113.059	643.33	101.287	643.68	98.0692	638.459	96.3931	637.624	84.7819	640.086	88.7689	640.266	87.2794	640.555	86.2867
	638.22	112.469	644.33	100.769	644.68	98.1054	639.459	97.4661	638.624	85.8422	641.086	89.3464	641.266	87.041	641.555	86.0835
	639.22	111.122	645.33	100.621	645.68	98.7308	640.459	96.8015	639.624	84.7499	642.086	89.4827	642.266	88.3116	642.555	85.9203
	640.22	112.389	646.33	101.482	646.68	98.0038	641.459	96.8997	640.624	85.4477	643.086	89.3408	643.266	88.6863	643.555	86.0995
	641.22	114.04	647.33	100.848	647.68	98.3934	642.459	96.6313	641.624	85.5445	644.086	87.6747	644.266	88.002	644.555	85.7681
	642.22	112.118	648.33	100.156	648.68	98.4826	643.459	96.4891	642.624	85.441	645.086	89.3118	645.266	86.8933	645.555	85.8122
	643.22	113.04	649.33	100.858	649.68	99.028	644.459	97.8341	643.624	85.2133	646.086	88.9364	646.266	87.0845	646.555	86.6444
	644.22	112.326	650.33	100.837	650.68	99.2723	645.459	96.1312	644.624	85.2334	647.086	89.0869	647.266	87.2856	647.555	86.6071
	645.22	112.45	651.33	100.439	651.68	97.9534	646.459	97.985	645.624	84.9906	648.086	89.1944	648.266	87.6027	648.555	86.7477
	646.22	111.447	652.33	100.171	652.68	98.3797	647.459	96.2842	646.624	85.829	649.086	88.368	649.266	87.3721	649.555	86.0276
	647.22	113.312	653.33	101.218	653.68	98.5933	648.459	96.5967	647.624	85.1158	650.086	88.3888	650.266	88.3257	650.555	86.2026
	648.22	113.051	654.33	100.346	654.68	98.7091	649.459	97.6843	648.624	86.3035	651.086	88.4631	651.266	88.1815	651.555	86.5887
	649.22	113.207	655.33	100.727	655.68	98.7384	650.459	97.9129	649.624	86.2954	652.086	88.6494	652.266	87.7685	652.555	86.9064
	650.22	113.013	656.33	99.9598	656.68	98.4238	651.459	96.7887	650.624	86.0624	653.086	88.783	653.266	87.8676	653.555	86.1311
	651.22	113.733	657.33	101.073	657.68	99.2054	652.459	97.6331	651.624	86.2398	654.086	89.0736	654.266	86.9794	654.555	87.636
	652.22	111.773	658.33	100.59	658.68	98.7849	653.459	97.7177	652.624	86.0332	655.086	89.305	655.266	87.0061	655.555	86.2904
	653.22	113.287	659.33	100.705	659.68	99.2377	654.459	97.2797	653.624	85.4457	656.086	88.3404	656.266	87.8454	656.555	85.2822
	654.22	112.084	660.33	100.744	660.68	99.1814	655.459	97.3445	654.624	85.087	657.086	89.7449	657.266	87.9369	657.555	86.5303
	655.22	112.624	661.33	99.7801	661.68	99.461	656.459	97.5727	655.624	85.0376	658.086	88.9815	658.266	87.5841	658.555	85.2136
	656.22	112.697	662.33	100.178	662.68	98.9142	657.459	97.3353	656.624	85.8298	659.086	88.4158	659.266	87.6131	659.555	86.153
	657.22	113.706	663.33	100.696	663.68	98.3803	658.459	96.841	657.624	85.4744	660.086	89.3722	660.266	88.2223	660.555	85.9747
	658.22	112.817	664.33	101.058	664.68	98.3872	659.459	98.1745	658.624	84.8772	661.086	89.0909	661.266	87.1552	661.555	86.7469
	659.22	113.599	665.33	101.297	665.68	98.9466	660.459	97.1729	659.624	85.4306	662.086	87.8959	662.266	87.7236	662.555	86.0468
	660.22	113.963	666.33	101.539	666.68	99.5196	661.459	97.8585	660.624	85.3376	663.086	88.1986	663.266	87.4447	663.555	86.4623
	661.22	112.965	667.33	101.07	667.68	100.261	662.459	97.6423	661.624	86.2856	664.086	89.2478	664.266	87.2928	664.555	85.6833
	662.22	112.119	668.33	100.955	668.68	99.7499	663.459	97.9293	662.624	85.1162	665.086	89.2514	665.266	86.7388	665.555	86.1395
	663.22	113.256	669.33	101.558	669.68	98.2498	664.459	97.5714	663.624	85.0908	666.086	89.7973	666.266	88.4336	666.555	85.9259
	664.22	113.367	670.33	102.403	670.68	99.0447	665.459	97.7878	664.624	85.0563	667.086	89.0012	667.266	88.0407	667.555	85.8508
	665.22	113.17	671.33	101.084	671.68	99.0971	666.459	97.5965	665.624	86.069	668.086	88.5142	668.266	87.6705	668.555	86.3424
	666.22	112.946	672.33	101.097	672.68	99.3581	667.459	97.6645	666.624	85.7409	669.086	88.0994	669.266	87.7752	669.555	85.9477
	667.22	113.731	673.33	101.626	673.68	100.128	668.459	97.2745	667.624	85.344	670.086	87.962	670.266	86.9694	670.555	86.2397
	668.22	112.599	674.33	100.576	674.68	99.2988	669.459	98.9537	668.624	85.4161	671.086	88.7939	671.266	87.4247	671.555	86.5234
	669.22	112.819	675.33	102.15	675.68	100.203	670.459	97.8503	669.624	85.1851	672.086	89.7864	672.266	87.6949	672.555	87.1352
	670.22	113.313	676.33	101.776	676.68	99.6591	671.459	97.0034	670.624	85.7869	673.086	88.7305	673.266	88.3745	673.555	85.709
	671.22	114.169	677.33	100.712	677.68	99.6406	672.459	97.272	671.624	85.3771	674.086	88.7781	674.266	87.8804	674.555	85.5418
	672.22	112.816	678.33	100.182	678.68	99.2827	673.459	97.3385	672.624	86.0026	675.086	90.7076	675.266	87.6616	675.555	86.0518
	673.22	114.333	679.33	101.597	679.68	100.376	674.459	97.5351	673.624	85.9229	676.086	88.9862	676.266	87.3114	676.555	85.8722
	674.22	113.693	680.33	101.277	680.68	100.4	675.459	97.9718	674.624	87.0718	677.086	88.638	677.266	87.5356	677.555	86.4346
	675.22	112.975	681.33	101.342	681.68	100.3	676.459	97.2496	675.624	86.4729	678.086	88.422	678.266	88.0145	678.555	85.2946
	676.22	113.779	682.33	101.94	682.68	99.4681	677.459	98.3803	676.624	85.5514	679.086	88.2827	679.266	87.6586	679.555	86.6903
	677.22	113.444	683.33	101.506	683.68	99.7479	678.459	98.2407	677.624	85.0201	680.086	88.8505	680.266	89.1467	680.555	86.0178
	678.22	114.805	684.33	101.948	684.68	98.9092	679.459	98.0422	678.624	85.9733	681.086	89.5592	681.266	87.6094	681.555	87.0757
	679.22	114.077	685.33	102.513	685.68	100.095	680.459	98.3623	679.624	85.5893	682.086	88.2298	682.266	87.6985	682.555	86.5298
	680.22	114.053	686.33	101.345	686.68	99.5689	681.459	98.3577	680.624	85.5512	683.086	89.12	683.266	88.2013	683.555	85.4364
	681.22	114.415	687.33	101.931	687.68	99.3743	682.459	98.4628	681.624	85.8699	684.086	88.4537	684.266	88.5653	684.555	86.365
	682.22	114.032	688.33	101.606	688.68	99.3477	683.459	96.9495	682.624	86.6478	685.086	89.0102	685.266	87.6283	685.555	86.5563
	683.22	113.307	689.33	102.872	689.68	99.5382	684.459	97.9045	683.624	86.3975	686.086	88.9845	686.266	87.9889	686.555	85.4516
	684.22	113.749	690.33	102.466	690.68	99.753	685.459	98.2271	684.624	85.9902	687.086	88.6102	687.266	88.6181	687.555	86.0705
	685.22	113.521	691.33	101.26	691.68	99.7637	686.459	97.8863	685.624	86.519	688.086	88.6454	688.266	88.0145	688.555	86.0793
	686.22	113.692	692.33	103.09	692.68	99.8532	687.459	97.3827	686.624	86.3705	689.086	89.4056	689.266	87.976	689.555	85.2015
	687.22	113.82	693.33	101.997	693.68	100.325	688.459	98.0442	687.624	85.5431	690.086	88.5069	690.266	87.8941	690.555	86.4196
	688.22	114.981	694.33	101.696	694.68	99.5452	689.459	98.3981	688.624	85.8846	691.086	89.1354	691.266	88.1676	691.555	86.0346
	689.22	113.363	695.33	102.138	695.68	99.9403	690.459	97.897	689.624	87.1903	692.086	89.1099	692.266	88.3093	692.555	86.9723
	690.22	114.205	696.33	102.936	696.68	100.326	691.459	98.0392	690.624	85.6329	693.086	88.6238	693.266	87.2777	693.555	85.1763
	691.22	113.735	697.33	102.243	697.68	99.9917	692.459	98.7111	691.624	86.1647	694.086	89.1419	694.266	87.6414	694.555	86.1742
	692.22	114.448	698.33	102.217	698.68	99.7272	693.459	98.1435	692.624	86.662	695.086	88.9869	695.266	87.2563	695.555	86.1297
	693.22	114.436	699.33	101.793	699.68	99.4634	694.459	98.5881	693.624	86.4081	696.086	89.3469	696.266	88.2726	696.555	86.5924
	694.22	115.091	700.33	102.127	700.68	100.129	695.459	97.6101	694.624	85.3465	697.086	88.88	697.266	87.3869	697.555	86.0035
	695.22	114.554	701.33	102.06	701.68	99.5864	696.459	98.0124	695.624	86.0414	698.086	89.3582	698.266	87.869	698.555	85.9752
	696.22	114.076	702.33	103.13	702.68	99.3134	697.459	97.9865	696.624	85.7294	699.086	88.7893	699.266	87.0643	699.555	86.0691
	697.22	114.708	703.33	101.651	703.68	99.8904	698.459	97.7086	697.624	86.4519	700.086	90.0181	700.266	88.4955	700.555	87.0131
	698.22	114.313	704.33	102.677	704.68	100.466	699.459	97.6929	698.624	87.0353	701.086	90.22	701.266	88.0625	701.555	85.4971
	699.22	114.693	705.33	102.58	705.68	100.477	700.459	97.7151	699.624	86.1765	702.086	88.703	702.266	87.436	702.555	85.4581
	700.22	114.804	706.33	101.717	706.68	100.372	701.459	98.4222	700.624	86.3638	703.086	89.8763	703.266	87.5426	703.555	86.3604
	701.22	114.585	707.33	102.696	707.68	100.314	702.459	98.6146	701.624	86.9923	704.086	89.7152	704.266	87.7762	704.555	85.649
	702.22	114.421	708.33	102.651	708.68	100.608	703.459	98.7049	702.624	86.4461	705.086	89.2647	705.266	87.7455	705.555	86.3338
	703.22	114.38	709.33	102.304	709.68	100.783	704.459	98.243	703.624	86.5322	706.086	89.4109	706.266	87.0562	706.555	85.9147
	704.22	114.84	710.33	102.622	710.68	100.283	705.459	98.2196	704.624	85.6652	707.086	88.6365	707.266	88.2878	707.555	85.4894
	705.22	114.379	711.33	103.737	711.68	100.554	706.459	98.0098	705.624	85.3482	708.086	88.5453	708.266	88.0937	708.555	86.0797
	706.22	114.18	712.33	102.589	712.68	100.333	707.459	98.5401	706.624	85.6037	709.086	89.4668	709.266	87.0214	709.555	86.7356
	707.22	113.699	713.33	102.002	713.68	99.439	708.459	98.0384	707.624	86.0092	710.086	88.9945	710.266	86.73	710.555	86.3599
	708.22	115.891	714.33	102.803	714.68	99.9293	709.459	98.5089	708.624	85.3012	711.086	88.5709	711.266	87.9093	711.555	85.5979
	709.22	115.603	715.33	103.297	715.68	99.6618	710.459	97.7216	709.624	87.153	712.086	89.5183	712.266	88.048	712.555	85.6037
	710.22	114.589	716.33	103.542	716.68	100.73	711.459	97.6536	710.624	86.0926	713.086	88.2203	713.266	88.3265	713.555	85.9864
	711.22	113.873	717.33	102.33	717.68	100.555	712.459	99.2781	711.624	85.969	714.086	88.9821	714.266	87.1479	714.555	87.1272
	712.22	114.803	718.33	104.084	718.68	100.502	713.459	98.6587	712.624	86.703	715.086	88.8105	715.266	88.0475	715.555	86.0139
	713.22	115.439	719.33	103.35	719.68	100.666	714.459	100.367	713.624	87.4137	716.086	89.4701	716.266	87.7563	716.555	86.6206
	714.22	115.083	720.33	103.377	720.68	100.593	715.459	98.642	714.624	85.6359	717.086	89.1169	717.266	88.2411	717.555	87.0721
	715.22	114.678	721.33	103.003	721.68	100.538	716.459	98.5241	715.624	86.7131	718.086	89.7968	718.266	87.8408	718.555	85.9503
	716.22	114.522	722.33	103.52	722.68	100.317	717.459	98.7119	716.624	85.7443	719.086	89.3912	719.266	87.4552	719.555	86.2414
	717.22	115.651	723.33	103.379	723.68	100.774	718.459	98.3112	717.624	86.3793	720.086	89.6097	720.266	87.033	720.555	85.9735
	718.22	115.012	724.33	103.228	724.68	101.524	719.459	98.3941	718.624	86.0255	721.086	89.3312	721.266	87.952	721.555	86.3801
	719.22	114.337	725.33	103.07	725.68	101.245	720.459	99.1704	719.624	86.7854	722.086	88.823	722.266	87.816	722.555	85.7158
	720.22	115.973	726.33	104.353	726.68	101.042	721.459	99.6829	720.624	85.9592	723.086	89.8177	723.266	87.7486	723.555	86.4514
	721.22	115.911	727.33	104	727.68	101.371	722.459	98.2922	721.624	86.2608	724.086	89.284	724.266	87.7116	724.555	86.8208
	722.22	115.586	728.33	103.317	728.68	101.139	723.459	99.3075	722.624	85.9651	725.086	89.5018	725.266	87.7711	725.555	86.7939
	723.22	114.423	729.33	102.86	729.68	100.731	724.459	99.3261	723.624	87.1963	726.086	90.0263	726.266	88.2614	726.555	85.5228
	724.22	115.255	730.33	103.61	730.68	101.445	725.459	99.5251	724.624	85.8807	727.086	89.6694	727.266	87.2411	727.555	85.6603
	725.22	115.209	731.33	102.51	731.68	101.271	726.459	99.4486	725.624	87.257	728.086	89.0183	728.266	87.4476	728.555	86.2897
	726.22	115.794	732.33	103.076	732.68	101.299	727.459	99.3831	726.624	86.0507	729.086	89.1287	729.266	87.7678	729.555	85.8791
	727.22	115.922	733.33	102.971	733.68	101.162	728.459	98.3017	727.624	86.5575	730.086	89.7276	730.266	87.8745	730.555	86.3275
	728.22	115.147	734.33	103.151	734.68	102.074	729.459	98.7354	728.624	86.6051	731.086	90.1234	731.266	88.2775	731.555	86.1991
	729.22	115.369	735.33	103.64	735.68	101.461	730.459	99.296	729.624	85.8547	732.086	89.3537	732.266	87.5633	732.555	87.0545
	730.22	115.531	736.33	103.017	736.68	101.906	731.459	99.5936	730.624	86.4439	733.086	89.2591	733.266	88.7448	733.555	86.4408
	731.22	115.15	737.33	104.277	737.68	101.007	732.459	98.8801	731.624	86.7099	734.086	89.7193	734.266	88.2176	734.555	86.1575
	732.22	114.655	738.33	104.253	738.68	102.203	733.459	98.4518	732.624	86.6146	735.086	90.2321	735.266	87.794	735.555	86.2147
	733.22	115.283	739.33	104.098	739.68	101.298	734.459	98.8744	733.624	85.8073	736.086	89.1853	736.266	87.6213	736.555	85.9638
	734.22	114.474	740.33	103.025	740.68	101.132	735.459	98.6866	734.624	86.6821	737.086	89.659	737.266	87.7504	737.555	86.2713
	735.22	115.836	741.33	103.329	741.68	102.347	736.459	98.5976	735.624	86.2323	738.086	89.3259	738.266	88.3416	738.555	86.3244
	736.22	114.382	742.33	103.339	742.68	101.849	737.459	98.7255	736.624	86.3208	739.086	90.3276	739.266	87.7379	739.555	86.5319
	737.22	114.641	743.33	103.403	743.68	101.595	738.459	99.065	737.624	86.0022	740.086	89.3291	740.266	88.1125	740.555	86.7054
	738.22	115.38	744.33	103.286	744.68	102.062	739.459	99.4952	738.624	87.1368	741.086	89.4057	741.266	87.5474	741.555	85.7894
	739.22	114.959	745.33	102.813	745.68	101.263	740.459	99.072	739.624	86.8673	742.086	88.9533	742.266	88.1002	742.555	85.3156
	740.22	115.792	746.33	103.621	746.68	101.297	741.459	99.2757	740.624	85.5624	743.086	89.5971	743.266	87.4605	743.555	86.3302
	741.22	115.591	747.33	103.42	747.68	102.228	742.459	99.1535	741.624	86.5011	744.086	89.4001	744.266	86.6599	744.555	85.2106
	742.22	115.777	748.33	103.545	748.68	101.607	743.459	98.7885	742.624	86.926	745.086	89.3646	745.266	88.6255	745.555	86.9469
	743.22	114.962	749.33	103.423	749.68	102.114	744.459	99.5765	743.624	87.065	746.086	88.9729	746.266	88.195	746.555	86.728
	744.22	116.47	750.33	104.078	750.68	102.215	745.459	98.5483	744.624	87.1336	747.086	89.1405	747.266	87.7036	747.555	85.8944
	745.22	116.898	751.33	104.156	751.68	101.487	746.459	99.3358	745.624	86.5184	748.086	90.1111	748.266	87.9154	748.555	86.5494
	746.22	114.587	752.33	102.966	752.68	102.24	747.459	97.4944	746.624	86.5298	749.086	88.7631	749.266	87.9161	749.555	85.9677
	747.22	116.464	753.33	104.458	753.68	101.868	748.459	99.5408	747.624	87.3641	750.086	89.4444	750.266	86.4345	750.555	86.4489
	748.22	116.531	754.33	103.686	754.68	101.744	749.459	99.829	748.624	87.3286	751.086	89.2441	751.266	88.1778	751.555	86.0639
	749.22	115.74	755.33	103.537	755.68	101.396	750.459	99.235	749.624	85.9053	752.086	89.6619	752.266	87.5446	752.555	85.9816
	750.22	114.942	756.33	103.35	756.68	102.351	751.459	99.277	750.624	86.4845	753.086	89.6479	753.266	87.2561	753.555	86.7992
	751.22	115.474	757.33	103.734	757.68	102.003	752.459	100.383	751.624	86.1448	754.086	89.2691	754.266	87.7541	754.555	86.3808
	752.22	115.381	758.33	103.645	758.68	102.162	753.459	100.092	752.624	86.9144	755.086	89.6311	755.266	87.3762	755.555	85.715
	753.22	114.304	759.33	104.478	759.68	102.197	754.459	99.6164	753.624	87.3406	756.086	90.2543	756.266	87.1396	756.555	86.6012
	754.22	115.112	760.33	104.541	760.68	102.225	755.459	99.3175	754.624	87.7446	757.086	89.9805	757.266	88.03	757.555	85.6298
	755.22	115.538	761.33	105.351	761.68	102.102	756.459	99.6244	755.624	86.7451	758.086	89.6451	758.266	86.8393	758.555	86.4269
	756.22	115.204	762.33	104.287	762.68	102.047	757.459	100.146	756.624	86.2488	759.086	89.3326	759.266	87.7658	759.555	86.7218
	757.22	115.812	763.33	103.407	763.68	101.543	758.459	98.8731	757.624	86.0268	760.086	89.5706	760.266	87.3623	760.555	87.2781
	758.22	115.538	764.33	104.85	764.68	103.236	759.459	98.1424	758.624	87.6282	761.086	89.9528	761.266	87.104	761.555	86.2804
	759.22	115.016	765.33	103.973	765.68	102.289	760.459	99.6664	759.624	86.8037	762.086	90.2498	762.266	88.549	762.555	85.9047
	760.22	115.171	766.33	104.007	766.68	102.475	761.459	99.4566	760.624	86.7137	763.086	89.778	763.266	87.7325	763.555	86.6694
	761.22	115.461	767.33	104.82	767.68	101.606	762.459	98.7528	761.624	86.4521	764.086	89.815	764.266	87.9699	764.555	86.5034
	762.22	115.674	768.33	103.712	768.68	102.379	763.459	100.425	762.624	87.0836	765.086	89.1461	765.266	87.7036	765.555	86.3469
	763.22	115.78	769.33	104.602	769.68	102.751	764.459	98.8285	763.624	86.9288	766.086	89.1925	766.266	88.3923	766.555	86.0978
	764.22	115.903	770.33	103.962	770.68	102.832	765.459	99.0241	764.624	87.6378	767.086	88.6467	767.266	87.1799	767.555	86.4649
	765.22	116.385	771.33	103.591	771.68	102.228	766.459	99.6019	765.624	86.6561	768.086	89.1018	768.266	88.1348	768.555	85.7119
	766.22	116.53	772.33	105.057	772.68	102.474	767.459	99.0955	766.624	87.0962	769.086	90.0651	769.266	87.5879	769.555	86.7456
	767.22	116.693	773.33	105.225	773.68	102.741	768.459	99.9813	767.624	86.6144	770.086	90.3234	770.266	88.0505	770.555	86.6269
	768.22	116.649	774.33	104.178	774.68	102.513	769.459	99.8118	768.624	86.8622	771.086	89.7871	771.266	87.5318	771.555	86.2447
	769.22	116.83	775.33	104.218	775.68	102.01	770.459	99.9921	769.624	86.5512	772.086	89.7884	772.266	88.4206	772.555	85.8576
	770.22	115.688	776.33	104.293	776.68	101.534	771.459	100.09	770.624	88.2394	773.086	89.978	773.266	87.7367	773.555	85.5314
	771.22	116.345	777.33	103.797	777.68	101.657	772.459	99.6711	771.624	86.8785	774.086	89.3791	774.266	87.8877	774.555	86.5481
	772.22	116.614	778.33	104.411	778.68	102.193	773.459	99.1331	772.624	86.8719	775.086	89.1121	775.266	87.3515	775.555	86.5324
	773.22	115.691	779.33	104.741	779.68	102.938	774.459	99.5346	773.624	86.9968	776.086	89.429	776.266	87.3516	776.555	85.8604
	774.22	116.259	780.33	104.072	780.68	102.581	775.459	99.467	774.624	87.2435	777.086	89.5125	777.266	88.1762	777.555	85.672
	775.22	116.369	781.33	104.248	781.68	103.099	776.459	99.6424	775.624	87.5561	778.086	90.0764	778.266	87.2107	778.555	85.5427
	776.22	116.397	782.33	105.23	782.68	103.22	777.459	100.06	776.624	87.0777	779.086	89.7263	779.266	87.1184	779.555	86.2243
	777.22	116.696	783.33	104.126	783.68	102.902	778.459	99.7136	777.624	86.8555	780.086	90.0172	780.266	88.0659	780.555	86.5974
	778.22	116.037	784.33	104.6	784.68	103.178	779.459	100.003	778.624	86.5018	781.086	90.51	781.266	87.366	781.555	86.0623
	779.22	115.883	785.33	105.439	785.68	103.23	780.459	99.3564	779.624	86.4832	782.086	90.3017	782.266	87.5511	782.555	86.9334
	780.22	116.368	786.33	104.345	786.68	103.334	781.459	100.198	780.624	86.4684	783.086	89.5327	783.266	87.8613	783.555	87.3665
	781.22	116.514	787.33	104.116	787.68	102.144	782.459	100.522	781.624	88.0463	784.086	90.2305	784.266	88.0855	784.555	86.2017
	782.22	117.142	788.33	105.538	788.68	102.828	783.459	100.492	782.624	86.8604	785.086	89.3285	785.266	88.1671	785.555	86.4539
	783.22	115.614	789.33	103.522	789.68	102.501	784.459	99.6909	783.624	87.304	786.086	89.695	786.266	88.1174	786.555	86.552
	784.22	116.841	790.33	104.462	790.68	102.349	785.459	100.408	784.624	87.0624	787.086	89.881	787.266	87.5229	787.555	86.1204
	785.22	117.355	791.33	104.782	791.68	103.119	786.459	100.24	785.624	87.8533	788.086	89.3114	788.266	88.4911	788.555	85.5276
	786.22	116.374	792.33	104.695	792.68	102.438	787.459	99.354	786.624	87.2944	789.086	89.9356	789.266	89.175	789.555	85.3925
	787.22	116.256	793.33	104.086	793.68	102.915	788.459	99.5149	787.624	87.2829	790.086	89.6718	790.266	87.9919	790.555	86.3241
	788.22	115.934	794.33	104.743	794.68	104.168	789.459	100.549	788.624	86.3357	791.086	89.4813	791.266	87.034	791.555	86.374
	789.22	116.776	795.33	104.676	795.68	103.66	790.459	99.3668	789.624	87.4722	792.086	88.9964	792.266	86.8679	792.555	86.0674
	790.22	116.151	796.33	104.378	796.68	103.618	791.459	100.389	790.624	87.7894	793.086	90.3228	793.266	87.7897	793.555	86.2507
	791.22	116.695	797.33	105.498	797.68	102.442	792.459	99.9879	791.624	87.3872	794.086	89.3366	794.266	88.1016	794.555	86.1725
	792.22	116.237	798.33	104.881	798.68	102.464	793.459	100.346	792.624	86.8265	795.086	89.4478	795.266	88.4478	795.555	86.4723
	793.22	116.868	799.33	105.012	799.68	103.948	794.459	99.6646	793.624	87.913	796.086	88.9026	796.266	86.5535	796.555	85.3202
	794.22	117.532	800.33	105.889	800.68	103.13	795.459	99.811	794.624	87.2038	797.086	89.3922	797.266	86.9703	797.555	86.5234
	795.22	117.179	801.33	105.234	801.68	103.352	796.459	100.466	795.624	87.2744	798.086	90.0279	798.266	88.341	798.555	85.9448
	796.22	116.165	802.33	105.573	802.68	103.044	797.459	99.5991	796.624	87.6832	799.086	89.8256	799.266	87.0245	799.555	85.9704
	797.22	117.3	803.33	105.27	803.68	104.056	798.459	99.3863	797.624	87.6191	800.086	90.9873	800.266	88.7792	800.555	86.3881
	798.22	117.986	804.33	104.874	804.68	102.28	799.459	100.513	798.624	87.4894	801.086	90.1723	801.266	87.7059	801.555	86.6125
	799.22	116.334	805.33	105.372	805.68	103.433	800.459	100.801	799.624	88.3903	802.086	89.7949	802.266	87.5608	802.555	86.2697
	800.22	116.978	806.33	105.652	806.68	102.547	801.459	100.888	800.624	87.8298	803.086	90.3929	803.266	86.8497	803.555	86.2204
	801.22	116.669	807.33	104.523	807.68	102.954	802.459	100.509	801.624	87.6431	804.086	89.6622	804.266	88.6371	804.555	86.7047
	802.22	117.314	808.33	105.627	808.68	102.453	803.459	101.032	802.624	88.0288	805.086	89.7914	805.266	87.9248	805.555	85.0963
	803.22	117.221	809.33	106.135	809.68	103.798	804.459	100.485	803.624	88.1312	806.086	89.8735	806.266	88.1898	806.555	86.353
	804.22	117.015	810.33	105.169	810.68	103.298	805.459	100.729	804.624	87.45	807.086	90.4987	807.266	87.3744	807.555	86.8917
	805.22	116.996	811.33	104.723	811.68	103.781	806.459	100.033	805.624	87.0334	808.086	90.4545	808.266	87.0123	808.555	85.5427
	806.22	116.824	812.33	105.997	812.68	102.967	807.459	100.371	806.624	87.5832	809.086	90.856	809.266	87.5624	809.555	85.48
	807.22	117.674	813.33	105.886	813.68	103.825	808.459	100.751	807.624	87.5785	810.086	90.8975	810.266	87.0791	810.555	86.7115
	808.22	116.38	814.33	105.51	814.68	103.953	809.459	100.246	808.624	87.7692	811.086	90.8756	811.266	87.557	811.555	85.9192
	809.22	116.988	815.33	105.126	815.68	103.252	810.459	100.585	809.624	87.0023	812.086	90.0878	812.266	88.3203	812.555	86.279
	810.22	117.968	816.33	105.946	816.68	103.559	811.459	100.904	810.624	87.319	813.086	89.7512	813.266	87.9991	813.555	87.0412
	811.22	116.853	817.33	106.186	817.68	103.66	812.459	100.486	811.624	87.8948	814.086	90.0474	814.266	87.0887	814.555	87.0413
	812.22	118.02	818.33	104.981	818.68	102.842	813.459	101.073	812.624	86.7379	815.086	90.7144	815.266	87.2812	815.555	85.8999
	813.22	116.94	819.33	104.702	819.68	103.567	814.459	100.998	813.624	87.1815	816.086	89.7474	816.266	87.0787	816.555	86.6131
	814.22	116.697	820.33	105.822	820.68	103.671	815.459	100.253	814.624	87.8188	817.086	90.3336	817.266	88.3414	817.555	85.4901
	815.22	117.876	821.33	105.093	821.68	104.482	816.459	100.967	815.624	87.9644	818.086	89.5002	818.266	87.2639	818.555	85.7389
	816.22	116.477	822.33	105.447	822.68	103.6	817.459	101.01	816.624	87.4194	819.086	90.2804	819.266	86.8	819.555	86.7304
	817.22	117.794	823.33	105.263	823.68	104.142	818.459	101.021	817.624	88.0513	820.086	90.0718	820.266	87.9847	820.555	85.8496
	818.22	117.027	824.33	105.677	824.68	103.843	819.459	99.264	818.624	87.7226	821.086	89.3756	821.266	88.2014	821.555	86.4852
	819.22	117.401	825.33	106.557	825.68	103.076	820.459	100.918	819.624	87.283	822.086	89.5814	822.266	87.7647	822.555	85.6187
	820.22	117.769	826.33	105.922	826.68	104.012	821.459	100.526	820.624	87.4143	823.086	89.8615	823.266	87.6881	823.555	85.7648
	821.22	117.358	827.33	106.41	827.68	104.015	822.459	100.683	821.624	88.5551	824.086	90.3315	824.266	87.1315	824.555	85.3608
	822.22	116.396	828.33	105.687	828.68	103.53	823.459	101.034	822.624	87.119	825.086	90.7102	825.266	88.6054	825.555	86.6606
	823.22	117.795	829.33	105.373	829.68	104.367	824.459	100.903	823.624	88.0168	826.086	90.4353	826.266	87.5487	826.555	86.0328
	824.22	116.949	830.33	106.719	830.68	102.976	825.459	101.234	824.624	87.4927	827.086	90.3377	827.266	87.3079	827.555	87.0929
	825.22	116.947	831.33	106.519	831.68	104.413	826.459	100.773	825.624	87.6255	828.086	90.8115	828.266	87.8431	828.555	85.4897
	826.22	118.567	832.33	107.012	832.68	104.206	827.459	101.25	826.624	86.8458	829.086	90.6599	829.266	88.1018	829.555	86.3245
	827.22	118.326	833.33	106.078	833.68	103.88	828.459	101.563	827.624	88.1261	830.086	90.5906	830.266	88.1342	830.555	85.9678
	828.22	117.153	834.33	105.378	834.68	104.525	829.459	100.88	828.624	87.086	831.086	89.4636	831.266	87.0773	831.555	86.0589
	829.22	117.585	835.33	105.422	835.68	103.97	830.459	101.517	829.624	88.8777	832.086	89.7053	832.266	87.7247	832.555	86.6676
	830.22	116.442	836.33	105.765	836.68	103.715	831.459	101.431	830.624	87.4784	833.086	89.8575	833.266	87.7149	833.555	85.6357
	831.22	118.121	837.33	105.783	837.68	104.832	832.459	100.949	831.624	87.867	834.086	90.8655	834.266	87.4048	834.555	85.901
	832.22	117.157	838.33	107.165	838.68	104.242	833.459	101.12	832.624	87.5618	835.086	90.1663	835.266	87.1624	835.555	85.7956
	833.22	117.862	839.33	106.171	839.68	104.24	834.459	102.03	833.624	88.3286	836.086	90.0172	836.266	88.0533	836.555	85.3684
	834.22	117.995	840.33	106.862	840.68	103.013	835.459	102.327	834.624	87.5383	837.086	90.6295	837.266	88.6675	837.555	85.9036
	835.22	117.296	841.33	106.663	841.68	103.94	836.459	101.392	835.624	87.3126	838.086	89.488	838.266	87.2992	838.555	85.1168
	836.22	117.954	842.33	105.734	842.68	104.716	837.459	100.413	836.624	87.3975	839.086	90.1723	839.266	88.0091	839.555	86.2591
	837.22	117.714	843.33	106.615	843.68	103.64	838.459	100.814	837.624	87.0833	840.086	91.16	840.266	88.2756	840.555	85.9947
	838.22	117.345	844.33	106.474	844.68	104.222	839.459	101.207	838.624	88.8363	841.086	90.5246	841.266	88.2471	841.555	86.87
	839.22	118.518	845.33	106.728	845.68	104.628	840.459	101.376	839.624	88.1832	842.086	90.6124	842.266	87.8196	842.555	86.7843
	840.22	118.445	846.33	106.237	846.68	104.413	841.459	101.243	840.624	87.8578	843.086	90.3517	843.266	87.305	843.555	86.5927
	841.22	118.48	847.33	106.426	847.68	104.241	842.459	100.577	841.624	88.2122	844.086	90.6299	844.266	87.766	844.555	86.7634
	842.22	118.172	848.33	104.893	848.68	103.723	843.459	101.016	842.624	88.0739	845.086	89.8973	845.266	88.6048	845.555	86.107
	843.22	117.848	849.33	106.581	849.68	104.621	844.459	101.046	843.624	87.6025	846.086	90.2817	846.266	87.8161	846.555	86.1596
	844.22	117.558	850.33	106.318	850.68	104.014	845.459	101.76	844.624	87.6808	847.086	89.9425	847.266	86.6694	847.555	85.5468
	845.22	118.224	851.33	106.876	851.68	103.655	846.459	100.61	845.624	88.5386	848.086	90.4377	848.266	88.1271	848.555	85.9054
	846.22	117.386	852.33	106.222	852.68	104.22	847.459	101.085	846.624	87.9505	849.086	89.6048	849.266	88.3586	849.555	86.3592
	847.22	118.335	853.33	108.083	853.68	104.548	848.459	101.289	847.624	87.6352	850.086	89.7296	850.266	88.1856	850.555	86.4344
	848.22	118.426	854.33	106.161	854.68	103.344	849.459	101.123	848.624	89.1491	851.086	90.3859	851.266	88.4634	851.555	86.9113
	849.22	118.233	855.33	106.175	855.68	104.262	850.459	101.321	849.624	88.8341	852.086	90.3572	852.266	87.9082	852.555	86.633
	850.22	118.278	856.33	107.518	856.68	104.737	851.459	100.502	850.624	87.9987	853.086	89.8173	853.266	88.1951	853.555	87.7876
	851.22	118.716	857.33	106.504	857.68	104.771	852.459	102.515	851.624	88.0517	854.086	90.4315	854.266	87.5778	854.555	85.2877
	852.22	118.779	858.33	106.585	858.68	104.513	853.459	101.468	852.624	87.8044	855.086	90.499	855.266	87.1577	855.555	86.2941
	853.22	118.53	859.33	105.841	859.68	105.486	854.459	101.502	853.624	87.2649	856.086	90.7539	856.266	87.6638	856.555	86.3804
	854.22	118.387	860.33	107.488	860.68	105.019	855.459	101.35	854.624	88.349	857.086	90.0375	857.266	87.9283	857.555	86.7901
	855.22	118.807	861.33	107.363	861.68	104.971	856.459	100.714	855.624	87.6761	858.086	90.1991	858.266	88.0971	858.555	86.7548
	856.22	118.827	862.33	107.154	862.68	103.46	857.459	101.821	856.624	87.3421	859.086	90.4571	859.266	87.692	859.555	86.7145
	857.22	117.971	863.33	106.199	863.68	103.738	858.459	101.572	857.624	88.5903	860.086	90.4671	860.266	87.0144	860.555	87.0597
	858.22	118.648	864.33	105.09	864.68	104.691	859.459	101.404	858.624	87.8823	861.086	91.4323	861.266	87.3619	861.555	87.0593
	859.22	118.588	865.33	107.553	865.68	103.938	860.459	101.761	859.624	88.6051	862.086	90.5633	862.266	88.1337	862.555	85.9837
	860.22	118.804	866.33	108.403	866.68	104.811	861.459	101.865	860.624	87.6124	863.086	90.0892	863.266	88.7633	863.555	86.921
	861.22	118.666	867.33	107.147	867.68	104.557	862.459	100.954	861.624	87.0656	864.086	90.7153	864.266	87.8823	864.555	85.8961
	862.22	118.216	868.33	106.82	868.68	104.771	863.459	101.239	862.624	88.0218	865.086	90.9915	865.266	88.3522	865.555	86.4617
	863.22	118.937	869.33	106.896	869.68	104.699	864.459	102.077	863.624	88.4797	866.086	90.8793	866.266	87.5319	866.555	87.1282
	864.22	118.859	870.33	107.273	870.68	104.704	865.459	101.041	864.624	88.2336	867.086	89.6862	867.266	88.3951	867.555	86.6437
	865.22	119.111	871.33	106.976	871.68	104.289	866.459	102.15	865.624	88.3452	868.086	90.8504	868.266	87.7728	868.555	85.9353
	866.22	119.315	872.33	107.042	872.68	104.903	867.459	101.22	866.624	88.4495	869.086	90.7737	869.266	87.3302	869.555	85.8322
	867.22	118.933	873.33	106.79	873.68	104.858	868.459	101.92	867.624	88.1224	870.086	89.8753	870.266	88.102	870.555	85.5008
	868.22	119.216	874.33	106.701	874.68	104.959	869.459	101.033	868.624	88.2279	871.086	90.3161	871.266	87.3432	871.555	86.7961
	869.22	118.441	875.33	107.817	875.68	105.458	870.459	102.212	869.624	88.6354	872.086	89.7328	872.266	88.1662	872.555	85.5352
	870.22	118.747	876.33	107.472	876.68	105.823	871.459	102.137	870.624	89.0636	873.086	91.0168	873.266	88.3917	873.555	86.766
	871.22	118.811	877.33	107.489	877.68	104.99	872.459	101.671	871.624	88.3962	874.086	91.0299	874.266	88.0724	874.555	86.8371
	872.22	118.142	878.33	108.064	878.68	104.159	873.459	101.715	872.624	87.6137	875.086	90.8071	875.266	88.2545	875.555	85.8124
	873.22	117.874	879.33	106.445	879.68	105.582	874.459	101.366	873.624	88.2456	876.086	90.3922	876.266	87.3839	876.555	86.1944
	874.22	118.014	880.33	107.778	880.68	105.53	875.459	102.055	874.624	87.555	877.086	90.6572	877.266	87.8675	877.555	85.3948
	875.22	118.792	881.33	107.34	881.68	105.651	876.459	101.481	875.624	88.2628	878.086	91.3046	878.266	87.5671	878.555	86.3434
	876.22	119.818	882.33	107.044	882.68	105.481	877.459	101.682	876.624	87.8357	879.086	91.2221	879.266	87.6116	879.555	85.8308
	877.22	118.888	883.33	107.854	883.68	106.291	878.459	101.532	877.624	89.3495	880.086	90.8048	880.266	87.9171	880.555	85.8195
	878.22	118.743	884.33	107.114	884.68	104.66	879.459	101.005	878.624	88.6898	881.086	90.6944	881.266	87.9379	881.555	86.195
	879.22	119.331	885.33	107.55	885.68	105.366	880.459	103.076	879.624	87.7129	882.086	90.2499	882.266	87.7567	882.555	86.8725
	880.22	119.433	886.33	106.689	886.68	105.365	881.459	102.377	880.624	87.5585	883.086	89.4386	883.266	87.3381	883.555	85.9149
	881.22	119.902	887.33	106.999	887.68	105.762	882.459	101.184	881.624	88.3164	884.086	90.6758	884.266	87.7656	884.555	84.9718
	882.22	120.457	888.33	106.638	888.68	105.952	883.459	101.9	882.624	88.4943	885.086	90.4436	885.266	87.7609	885.555	86.814
	883.22	119.736	889.33	107.185	889.68	105.916	884.459	101.887	883.624	88.2006	886.086	90.2072	886.266	88.1052	886.555	86.1741
	884.22	118.251	890.33	106.819	890.68	105.861	885.459	101.167	884.624	88.5645	887.086	90.1563	887.266	88.6868	887.555	86.6489
	885.22	118.756	891.33	106.725	891.68	105.05	886.459	102.18	885.624	88.0602	888.086	90.7185	888.266	87.379	888.555	86.5825
	886.22	119.699	892.33	107.152	892.68	105.772	887.459	102.202	886.624	88.3519	889.086	90.8526	889.266	88.0042	889.555	85.8799
	887.22	118.754	893.33	106.335	893.68	106.258	888.459	101.399	887.624	88.0647	890.086	90.3021	890.266	87.9009	890.555	86.7565
	888.22	119.791	894.33	107.037	894.68	106.382	889.459	102.214	888.624	88.5461	891.086	91.2557	891.266	88.8302	891.555	86.3335
	889.22	118.899	895.33	107.8	895.68	105.703	890.459	102.097	889.624	88.3469	892.086	90.8461	892.266	87.8272	892.555	86.9689
	890.22	119.449	896.33	108.039	896.68	105.682	891.459	101.949	890.624	87.6584	893.086	91.0017	893.266	88.3721	893.555	86.4105
	891.22	118.965	897.33	106.955	897.68	104.943	892.459	101.627	891.624	88.1606	894.086	90.518	894.266	88.1056	894.555	85.3085
	892.22	118.987	898.33	107.309	898.68	105.974	893.459	102.702	892.624	88.3476	895.086	90.6977	895.266	87.0617	895.555	86.2987
	893.22	118.798	899.33	108.186	899.68	105.479	894.459	101.278	893.624	89.6688	896.086	90.4994	896.266	88.0763	896.555	86.9092
	894.22	119.243	900.33	107.203	900.68	104.904	895.459	102.176	894.624	88.0543	897.086	91.2581	897.266	87.773	897.555	86.4396
	895.22	119.594	901.33	107.743	901.68	105.687	896.459	102.365	895.624	88.7935	898.086	90.2915	898.266	89.178	898.555	85.6052
	896.22	117.979	902.33	106.345	902.68	105.685	897.459	102.655	896.624	88.0684	899.086	91.24	899.266	87.4091	899.555	86.2143
	897.22	119.302	903.33	107.513	903.68	105.564	898.459	102.479	897.624	88.8309	900.086	90.5278	900.266	87.5622	900.555	86.5788
	898.22	118.916	904.33	107.512	904.68	104.845	899.459	102.668	898.624	87.8333	901.086	90.4005	901.266	88.0619	901.555	86.2065
	899.22	119.477	905.33	108.003	905.68	105.114	900.459	101.79	899.624	88.9931	902.086	90.2824	902.266	88.3791	902.555	85.375
	900.22	117.704	906.33	107.687	906.68	106.897	901.459	102.341	900.624	88.9025	903.086	89.8623	903.266	87.7827	903.555	86.7872
	901.22	119.1	907.33	108.111	907.68	106.23	902.459	101.481	901.624	88.493	904.086	90.1428	904.266	88.8609	904.555	86.577
	902.22	119.746	908.33	107.272	908.68	106.352	903.459	102.968	902.624	88.1593	905.086	90.4858	905.266	87.6305	905.555	85.6315
	903.22	119.335	909.33	107.766	909.68	105.844	904.459	103.425	903.624	89.264	906.086	90.8829	906.266	87.9315	906.555	86.0278
	904.22	119.532	910.33	107.718	910.68	106.931	905.459	103.857	904.624	89.0225	907.086	91.1274	907.266	87.9571	907.555	86.306
	905.22	119.668	911.33	107.76	911.68	105.528	906.459	101.375	905.624	88.4284	908.086	89.7864	908.266	87.8255	908.555	85.9508
	906.22	118.936	912.33	108.514	912.68	106.324	907.459	101.718	906.624	88.3672	909.086	90.8849	909.266	87.8562	909.555	85.6957
	907.22	120.009	913.33	108.142	913.68	105.65	908.459	101.908	907.624	87.4416	910.086	91.0428	910.266	87.5899	910.555	86.4465
	908.22	118.692	914.33	108.046	914.68	106.111	909.459	102.253	908.624	87.9033	911.086	91.7223	911.266	88.3732	911.555	86.1203
	909.22	119.592	915.33	107.797	915.68	105.465	910.459	101.485	909.624	89.4055	912.086	90.6479	912.266	88.8308	912.555	84.9179
	910.22	118.478	916.33	108.232	916.68	105.685	911.459	102.205	910.624	88.1205	913.086	91.8133	913.266	87.0751	913.555	86.6086
	911.22	119.554	917.33	107.793	917.68	105.215	912.459	102.583	911.624	88.0114	914.086	90.6551	914.266	88.9893	914.555	85.8925
	912.22	120.183	918.33	108.974	918.68	106.257	913.459	101.848	912.624	89.1771	915.086	91.9039	915.266	87.2925	915.555	86.4851
	913.22	120.293	919.33	109.123	919.68	106.593	914.459	102.208	913.624	88.2153	916.086	90.5326	916.266	87.7713	916.555	87.0079
	914.22	119.756	920.33	108.133	920.68	106.055	915.459	102.27	914.624	88.3656	917.086	91.8383	917.266	87.3799	917.555	86.3646
	915.22	120.557	921.33	108.66	921.68	105.971	916.459	101.958	915.624	88.6571	918.086	90.405	918.266	89.0485	918.555	86.4168
	916.22	120.57	922.33	109.32	922.68	106.04	917.459	102.64	916.624	88.8202	919.086	91.8411	919.266	87.5364	919.555	86.6073
	917.22	119.884	923.33	108.646	923.68	104.935	918.459	102.579	917.624	89.4571	920.086	90.7361	920.266	87.8501	920.555	86.37
	918.22	119.531	924.33	109.348	924.68	106.257	919.459	102.172	918.624	89.319	921.086	91.426	921.266	87.0821	921.555	87.1304
	919.22	120.055	925.33	107.91	925.68	106.034	920.459	102.766	919.624	88.7806	922.086	89.8074	922.266	88.3706	922.555	86.4648
	920.22	120.435	926.33	108.982	926.68	106.399	921.459	102.42	920.624	89.243	923.086	90.2981	923.266	87.4624	923.555	86.3461
	921.22	120.386	927.33	108.305	927.68	106.423	922.459	102.708	921.624	89.3526	924.086	91.3647	924.266	87.479	924.555	85.7546
	922.22	119.534	928.33	108.902	928.68	105.615	923.459	101.572	922.624	88.5888	925.086	91.1066	925.266	87.7699	925.555	85.6892
	923.22	119.521	929.33	108.631	929.68	105.839	924.459	102.637	923.624	88.5769	926.086	90.3934	926.266	88.1793	926.555	86.3693
	924.22	119.776	930.33	107.765	930.68	106.433	925.459	102.057	924.624	88.883	927.086	91.2746	927.266	87.6459	927.555	86.7101
	925.22	120.068	931.33	108.41	931.68	105.846	926.459	103.632	925.624	89.7578	928.086	90.968	928.266	88.3681	928.555	86.1126
	926.22	121.03	932.33	107.141	932.68	105.945	927.459	102.064	926.624	89.0262	929.086	91.8837	929.266	87.4941	929.555	85.2708
	927.22	120.139	933.33	108.902	933.68	105.077	928.459	103.212	927.624	89.1183	930.086	91.8728	930.266	88.2363	930.555	86.3897
	928.22	119.35	934.33	108.63	934.68	106.479	929.459	102.322	928.624	89.6665	931.086	90.5512	931.266	87.1248	931.555	86.186
	929.22	120.445	935.33	108.537	935.68	106.768	930.459	102.352	929.624	88.3959	932.086	91.405	932.266	87.8759	932.555	86.9007
	930.22	120.323	936.33	109.103	936.68	106.262	931.459	102.622	930.624	88.9423	933.086	91.3273	933.266	88.9899	933.555	85.7637
	931.22	119.409	937.33	109.15	937.68	105.572	932.459	102.948	931.624	88.5693	934.086	91.9469	934.266	88.437	934.555	86.5766
	932.22	120.744	938.33	109.632	938.68	106.495	933.459	103.476	932.624	87.7389	935.086	90.7594	935.266	88.4894	935.555	86.3955
	933.22	119.354	939.33	108.602	939.68	105.945	934.459	102.394	933.624	88.428	936.086	91.4663	936.266	87.9106	936.555	87.136
	934.22	120.212	940.33	109.315	940.68	106.793	935.459	102.646	934.624	88.7519	937.086	91.5855	937.266	87.7608	937.555	85.8413
	935.22	120.735	941.33	108.594	941.68	107.255	936.459	102.756	935.624	89.0626	938.086	91.1383	938.266	88.2262	938.555	86.3825
	936.22	119.782	942.33	108.658	942.68	106.558	937.459	102.603	936.624	88.4398	939.086	90.4033	939.266	87.8719	939.555	86.2278
	937.22	119.9	943.33	108.411	943.68	107.304	938.459	102.167	937.624	88.0941	940.086	91.6861	940.266	87.624	940.555	85.8298
	938.22	119.866	944.33	108.617	944.68	105.764	939.459	102.662	938.624	88.256	941.086	90.4251	941.266	88.1137	941.555	86.0624
	939.22	120.049	945.33	109.384	945.68	107.226	940.459	102.901	939.624	88.9737	942.086	90.5708	942.266	87.7173	942.555	86.1405
	940.22	120.764	946.33	107.643	946.68	106.468	941.459	103.322	940.624	87.7007	943.086	91.3708	943.266	87.9268	943.555	85.5122
	941.22	119.958	947.33	109.594	947.68	106.179	942.459	102.463	941.624	88.6985	944.086	91.4439	944.266	88.2439	944.555	86.4158
	942.22	120.427	948.33	109.681	948.68	106.839	943.459	103.238	942.624	88.6554	945.086	91.3106	945.266	87.7333	945.555	86.4738
	943.22	120.516	949.33	108.933	949.68	105.19	944.459	103.369	943.624	88.6541	946.086	90.8409	946.266	87.8114	946.555	85.0107
	944.22	119.893	950.33	109.685	950.68	106.428	945.459	103.035	944.624	88.497	947.086	91.8407	947.266	88.6193	947.555	86.7911
	945.22	120.383	951.33	109.196	951.68	107.338	946.459	101.616	945.624	89.5922	948.086	91.8384	948.266	87.6133	948.555	85.8553
	946.22	120.927	952.33	109.767	952.68	106.509	947.459	103.736	946.624	89.4776	949.086	91.5997	949.266	88.4075	949.555	86.9223
	947.22	120.874	953.33	108.741	953.68	106.318	948.459	101.901	947.624	88.9317	950.086	91.9546	950.266	87.4987	950.555	87.1367
	948.22	120.454	954.33	109.047	954.68	106.746	949.459	102.424	948.624	89.6532	951.086	91.3313	951.266	88.5969	951.555	85.7215
	949.22	120.516	955.33	109.953	955.68	106.027	950.459	103.225	949.624	88.4206	952.086	90.8467	952.266	88.0102	952.555	86.4322
	950.22	119.489	956.33	109.221	956.68	106.612	951.459	102.541	950.624	89.1233	953.086	91.0883	953.266	87.5776	953.555	86.362
	951.22	120.489	957.33	108.214	957.68	106.806	952.459	103.388	951.624	88.5629	954.086	91.9941	954.266	87.9995	954.555	85.8597
	952.22	120.915	958.33	109.751	958.68	106.633	953.459	103.3	952.624	88.5296	955.086	91.7051	955.266	88.0482	955.555	85.7233
	953.22	120.632	959.33	109.173	959.68	107.341	954.459	103.593	953.624	89.1143	956.086	90.9622	956.266	87.1937	956.555	86.5341
	954.22	120.191	960.33	108.097	960.68	107.025	955.459	102.549	954.624	89.6981	957.086	90.2407	957.266	88.5135	957.555	85.3157
	955.22	120.318	961.33	109.232	961.68	106.939	956.459	103.139	955.624	89.1123	958.086	91.8102	958.266	88.1753	958.555	86.0604
	956.22	121.086	962.33	109.937	962.68	107.602	957.459	102.489	956.624	88.8134	959.086	90.9792	959.266	88.4125	959.555	86.889
	957.22	120.629	963.33	108.297	963.68	106.471	958.459	103.665	957.624	89.2079	960.086	90.6646	960.266	88.2404	960.555	86.9065
	958.22	121.024	964.33	109.278	964.68	106.3	959.459	103.377	958.624	89.0783	961.086	90.9591	961.266	88.501	961.555	86.4646
	959.22	120.975	965.33	109.312	965.68	107.671	960.459	103.114	959.624	88.5314	962.086	91.6009	962.266	87.1845	962.555	85.1911
	960.22	120.805	966.33	109.015	966.68	107.524	961.459	103.103	960.624	89.6085	963.086	90.8005	963.266	87.9607	963.555	86.5292
	961.22	120.126	967.33	109.173	967.68	107.855	962.459	103.045	961.624	89.0572	964.086	91.572	964.266	88.402	964.555	87.0881
	962.22	119.518	968.33	109.951	968.68	106.707	963.459	103.753	962.624	88.9755	965.086	91.7048	965.266	88.5633	965.555	85.7047
	963.22	120.167	969.33	108.818	969.68	106.501	964.459	103.438	963.624	88.8592	966.086	91.7947	966.266	88.2783	966.555	86.3629
	964.22	121.651	970.33	109.58	970.68	107.702	965.459	103.106	964.624	88.8772	967.086	91.6096	967.266	88.5819	967.555	86.4348
	965.22	121.054	971.33	109.497	971.68	106.825	966.459	102.82	965.624	88.7817	968.086	90.7521	968.266	88.9629	968.555	86.0672
	966.22	122.113	972.33	109.521	972.68	106.666	967.459	102.436	966.624	88.3005	969.086	91.0117	969.266	88.3977	969.555	86.5851
	967.22	120.998	973.33	109.551	973.68	106.532	968.459	103.443	967.624	89.5946	970.086	91.2472	970.266	89.0336	970.555	86.1276
	968.22	120.643	974.33	109.943	974.68	107.463	969.459	103.535	968.624	88.8846	971.086	91.7889	971.266	87.2111	971.555	85.6558
	969.22	121.724	975.33	109.421	975.68	107.003	970.459	103.841	969.624	88.6077	972.086	90.5099	972.266	88.0704	972.555	86.5491
	970.22	121.756	976.33	110.019	976.68	107.044	971.459	103.332	970.624	88.746	973.086	90.6178	973.266	88.5596	973.555	85.8506
	971.22	121.05	977.33	109.152	977.68	107.629	972.459	104.051	971.624	88.2638	974.086	90.4333	974.266	88.1956	974.555	86.3871
	972.22	121.364	978.33	109.094	978.68	107.474	973.459	103.62	972.624	88.6081	975.086	91.3871	975.266	88.5859	975.555	85.6824
	973.22	120.691	979.33	109.537	979.68	106.629	974.459	103.483	973.624	89.1535	976.086	90.6975	976.266	88.8735	976.555	86.5829
	974.22	121.27	980.33	110.091	980.68	107.698	975.459	103.068	974.624	89.2109	977.086	91.2528	977.266	87.8984	977.555	85.6224
	975.22	121.421	981.33	109.445	981.68	107.345	976.459	103.445	975.624	88.8345	978.086	91.7762	978.266	87.8502	978.555	86.5796
	976.22	120.727	982.33	108.734	982.68	106.77	977.459	103.687	976.624	89.978	979.086	91.0765	979.266	88.1522	979.555	86.4512
	977.22	122.373	983.33	109.71	983.68	107.659	978.459	102.894	977.624	88.8054	980.086	91.1924	980.266	88.3989	980.555	85.7392
	978.22	120.422	984.33	110.538	984.68	107.318	979.459	103.653	978.624	89.7838	981.086	91.4009	981.266	88.5834	981.555	86.4564
	979.22	121.842	985.33	109.827	985.68	107.542	980.459	103.301	979.624	89.0223	982.086	90.9243	982.266	87.8247	982.555	85.8837
	980.22	121.666	986.33	109.71	986.68	107.858	981.459	102.672	980.624	89.3253	983.086	90.6674	983.266	88.3668	983.555	85.3876
	981.22	121.778	987.33	109.539	987.68	108.02	982.459	103.323	981.624	90.5051	984.086	91.0835	984.266	87.7886	984.555	87.4189
	982.22	121.33	988.33	110.045	988.68	108.085	983.459	103.202	982.624	88.9595	985.086	90.6035	985.266	88.3346	985.555	86.2388
	983.22	120.463	989.33	108.962	989.68	107.867	984.459	102.666	983.624	89.7424	986.086	91.4073	986.266	87.104	986.555	86.0317
	984.22	121.883	990.33	110.079	990.68	106.995	985.459	102.107	984.624	89.4864	987.086	91.9278	987.266	88.335	987.555	85.5915
	985.22	120.87	991.33	109.026	991.68	108.051	986.459	102.66	985.624	89.2688	988.086	92.0317	988.266	87.9791	988.555	86.2718
	986.22	121.535	992.33	109.234	992.68	108.484	987.459	103.038	986.624	89.8284	989.086	90.9135	989.266	87.7596	989.555	85.4554
	987.22	122.09	993.33	110.645	993.68	107.354	988.459	103.574	987.624	89.7169	990.086	91.7937	990.266	88.4425	990.555	86.3166
	988.22	122.289	994.33	110.153	994.68	107.77	989.459	103.022	988.624	88.9839	991.086	91.809	991.266	88.1282	991.555	86.0971
	989.22	122.225	995.33	109.424	995.68	107.313	990.459	103.325	989.624	88.9937	992.086	91.4652	992.266	87.776	992.555	86.2289
	990.22	120.746	996.33	109.503	996.68	106.803	991.459	103.556	990.624	89.3148	993.086	91.757	993.266	87.5711	993.555	86.7844
	991.22	121.323	997.33	110.255	997.68	106.757	992.459	103.939	991.624	89.1883	994.086	91.6217	994.266	88.1565	994.555	85.8424
	992.22	120.902	998.33	110.175	998.68	108.136	993.459	103.814	992.624	89.4683	995.086	90.391	995.266	88.4201	995.555	86.5182
	993.22	121.003	999.33	110.793	999.68	107.157	994.459	103.608	993.624	89.8725	996.086	91.4937	996.266	87.8323	996.555	86.5534
	994.22	121.193	1000.33	109.484	1000.68	107.716	995.459	103.626	994.624	89.8867	997.086	91.396	997.266	88.6311	997.555	86.3195
	995.22	121.482	1001.33	111.175	1001.68	108.016	996.459	104.104	995.624	89.2331	998.086	91.1759	998.266	88.0472	998.555	86.445
	996.22	122.128	1002.33	110.389	1002.68	108.408	997.459	103.842	996.624	89.7112	999.086	91.2932	999.266	87.7403	999.555	86.1632
	997.22	122.069	1003.33	109.794	1003.68	107.872	998.459	103.715	997.624	89.4328	1000.09	91.4313	1000.27	87.6063	1000.55	86.9681
	998.22	121.707	1004.33	111.01	1004.68	107.92	999.459	102.516	998.624	88.962	1001.09	91.6229	1001.27	88.3857	1001.55	85.9947
	999.22	121.18	1005.33	109.091	1005.68	108.29	1000.46	104.782	999.624	90.0951	1002.09	91.6926	1002.27	88.0351	1002.55	86.6427
	1000.22	120.718	1006.33	110.066	1006.68	108.053	1001.46	103.954	1000.62	88.302	1003.09	91.6188	1003.27	88.9223	1003.55	85.8629
	1001.22	121.626	1007.33	110.194	1007.68	108.629	1002.46	104.037	1001.62	90.4353	1004.09	91.9601	1004.27	88.9844	1004.55	86.3759
	1002.22	121.575	1008.33	110.538	1008.68	107.945	1003.46	103.302	1002.62	89.4977	1005.09	90.9441	1005.27	88.8642	1005.55	85.1958
	1003.22	121.866	1009.33	109.88	1009.68	106.751	1004.46	104.04	1003.62	89.1792	1006.09	91.6152	1006.27	87.7051	1006.55	86.4814
	1004.22	121.794	1010.33	110.235	1010.68	108.331	1005.46	103.177	1004.62	88.8009	1007.09	91.2023	1007.27	88.965	1007.55	85.3878
	1005.22	121.283	1011.33	110.279	1011.68	107.923	1006.46	103.817	1005.62	89.4189	1008.09	91.0915	1008.27	87.664	1008.55	85.9689
	1006.22	121.098	1012.33	110.651	1012.68	108.384	1007.46	103.706	1006.62	89.4427	1009.09	91.3098	1009.27	88.1707	1009.55	85.5185
	1007.22	121.804	1013.33	111.025	1013.68	108.324	1008.46	103.895	1007.62	89.4764	1010.09	91.5803	1010.27	87.8836	1010.55	86.9766
	1008.22	121.488	1014.33	109.982	1014.68	107.69	1009.46	104.461	1008.62	89.1379	1011.09	91.6563	1011.27	87.5846	1011.55	86.2373
	1009.22	122.949	1015.33	110.978	1015.68	108.442	1010.46	103.66	1009.62	89.5001	1012.09	91.0163	1012.27	89.2856	1012.55	86.4407
	1010.22	122.27	1016.33	111.051	1016.68	108.606	1011.46	104.415	1010.62	90.0059	1013.09	91.3878	1013.27	88.455	1013.55	86.4195
	1011.22	122.302	1017.33	110.796	1017.68	108.581	1012.46	103.677	1011.62	89.443	1014.09	91.4127	1014.27	88.0595	1014.55	86.0743
	1012.22	122.188	1018.33	109.904	1018.68	108.368	1013.46	103.402	1012.62	89.717	1015.09	91.1707	1015.27	87.7508	1015.55	87.2358
	1013.22	121.69	1019.33	110.193	1019.68	108.498	1014.46	103.542	1013.62	89.7307	1016.09	91.4226	1016.27	88.8451	1016.55	85.971
	1014.22	121.953	1020.33	110.042	1020.68	108.271	1015.46	104.862	1014.62	89.9912	1017.09	91.4279	1017.27	88.1896	1017.55	86.1877
	1015.22	121.272	1021.33	110.601	1021.68	108.103	1016.46	104.473	1015.62	89.2946	1018.09	90.9385	1018.27	88.3215	1018.55	86.2025
	1016.22	122.22	1022.33	110.769	1022.68	108.265	1017.46	103.525	1016.62	89.4488	1019.09	92.3287	1019.27	87.5336	1019.55	86.2949
	1017.22	122.186	1023.33	110.32	1023.68	107.544	1018.46	102.732	1017.62	90.076	1020.09	91.9687	1020.27	88.0585	1020.55	86.3024
	1018.22	121.418	1024.33	110.745	1024.68	108.85	1019.46	104.319	1018.62	89.6585	1021.09	92.3901	1021.27	88.7026	1021.55	86.2638
	1019.22	121.535	1025.33	111.267	1025.68	108.935	1020.46	102.581	1019.62	90.3296	1022.09	91.5727	1022.27	88.7858	1022.55	86.0501
	1020.22	121.702	1026.33	110.858	1026.68	107.832	1021.46	103.713	1020.62	88.9711	1023.09	91.7553	1023.27	87.7243	1023.55	85.6278
	1021.22	122.904	1027.33	109.767	1027.68	107.901	1022.46	103.097	1021.62	90.1573	1024.09	92.056	1024.27	88.4362	1024.55	86.8852
	1022.22	122.314	1028.33	110.955	1028.68	107.439	1023.46	103.465	1022.62	89.9892	1025.09	92.1349	1025.27	88.5803	1025.55	85.8097
	1023.22	122.531	1029.33	112.112	1029.68	108.498	1024.46	104.168	1023.62	89.8116	1026.09	91.7501	1026.27	87.7222	1026.55	86.0053
	1024.22	121.849	1030.33	111.381	1030.68	108.429	1025.46	104.598	1024.62	90.1657	1027.09	91.8895	1027.27	87.8654	1027.55	86.2428
	1025.22	122.218	1031.33	110.809	1031.68	108.773	1026.46	104.251	1025.62	89.4647	1028.09	91.4407	1028.27	88.3062	1028.55	86.5648
	1026.22	122.559	1032.33	110.814	1032.68	108.903	1027.46	104.118	1026.62	88.8238	1029.09	91.1096	1029.27	88.4226	1029.55	86.3836
	1027.22	121.772	1033.33	110.43	1033.68	109.565	1028.46	104.485	1027.62	89.7669	1030.09	91.2099	1030.27	87.289	1030.55	85.9068
	1028.22	122.102	1034.33	110.886	1034.68	108.57	1029.46	103.948	1028.62	90.485	1031.09	91.9207	1031.27	87.311	1031.55	85.7157
	1029.22	122.412	1035.33	110.305	1035.68	109.622	1030.46	104.283	1029.62	89.2982	1032.09	92.2006	1032.27	87.9987	1032.55	86.6548
	1030.22	121.608	1036.33	110.291	1036.68	108.084	1031.46	104.678	1030.62	89.4814	1033.09	91.8863	1033.27	87.8377	1033.55	86.1923
	1031.22	123.567	1037.33	111.534	1037.68	108.384	1032.46	103.799	1031.62	90.2503	1034.09	91.5309	1034.27	87.6624	1034.55	86.1364
	1032.22	122.219	1038.33	110.144	1038.68	109.668	1033.46	104.227	1032.62	89.7656	1035.09	91.7308	1035.27	88.1155	1035.55	87.128
	1033.22	121.723	1039.33	111.377	1039.68	109.808	1034.46	105.366	1033.62	89.521	1036.09	91.7556	1036.27	88.4449	1036.55	86.3926
	1034.22	123.371	1040.33	110.456	1040.68	108.611	1035.46	103.953	1034.62	89.577	1037.09	91.951	1037.27	88.3205	1037.55	87.0188
	1035.22	122.927	1041.33	109.943	1041.68	108.944	1036.46	103.852	1035.62	89.3785	1038.09	91.8448	1038.27	88.1637	1038.55	86.607
	1036.22	122.354	1042.33	111.394	1042.68	108.965	1037.46	104.81	1036.62	89.5449	1039.09	92.5655	1039.27	88.3991	1039.55	86.8717
	1037.22	122.988	1043.33	109.87	1043.68	108.929	1038.46	103.824	1037.62	89.8474	1040.09	91.1485	1040.27	88.0292	1040.55	86.1058
	1038.22	123.043	1044.33	111.73	1044.68	108.44	1039.46	105.379	1038.62	90.3989	1041.09	91.9759	1041.27	88.2701	1041.55	86.9314
	1039.22	122.496	1045.33	111.225	1045.68	108.579	1040.46	104.723	1039.62	89.8303	1042.09	91.5125	1042.27	87.7514	1042.55	86.1855
	1040.22	122.576	1046.33	110.117	1046.68	109.315	1041.46	104.293	1040.62	89.8144	1043.09	90.4777	1043.27	89.0982	1043.55	87.0945
	1041.22	122.416	1047.33	110.588	1047.68	109.823	1042.46	104.225	1041.62	89.643	1044.09	91.9816	1044.27	87.6479	1044.55	86.8143
	1042.22	122.076	1048.33	111.236	1048.68	108.474	1043.46	104.459	1042.62	90.3805	1045.09	91.9531	1045.27	87.3947	1045.55	85.8998
	1043.22	123.183	1049.33	111.211	1049.68	109.45	1044.46	104.79	1043.62	89.7149	1046.09	92.3819	1046.27	87.5782	1046.55	86.3673
	1044.22	122.483	1050.33	110.965	1050.68	108.521	1045.46	103.649	1044.62	89.3867	1047.09	92.0755	1047.27	88.9706	1047.55	86.9201
	1045.22	122.586	1051.33	109.586	1051.68	109.695	1046.46	104.621	1045.62	89.7043	1048.09	91.9039	1048.27	88.9563	1048.55	86.2749
	1046.22	122.499	1052.33	110.745	1052.68	108.838	1047.46	104.999	1046.62	89.5916	1049.09	92.6757	1049.27	88.0691	1049.55	85.9612
	1047.22	122.976	1053.33	112.362	1053.68	108.819	1048.46	104.463	1047.62	89.8327	1050.09	91.5182	1050.27	87.7599	1050.55	85.9496
	1048.22	122.672	1054.33	110.962	1054.68	108.712	1049.46	104.465	1048.62	89.8582	1051.09	91.1752	1051.27	88.0457	1051.55	85.6929
	1049.22	124.014	1055.33	110.88	1055.68	108.872	1050.46	104.744	1049.62	89.5531	1052.09	91.7533	1052.27	88.2722	1052.55	85.9286
	1050.22	123.072	1056.33	111.108	1056.68	109.291	1051.46	103.859	1050.62	89.4359	1053.09	92.3134	1053.27	87.4869	1053.55	85.7593
	1051.22	122.966	1057.33	110.513	1057.68	109.66	1052.46	104.6	1051.62	89.5934	1054.09	91.3698	1054.27	87.1334	1054.55	86.5945
	1052.22	123.591	1058.33	110.67	1058.68	108.371	1053.46	104.152	1052.62	89.4507	1055.09	92.4402	1055.27	88.2343	1055.55	85.805
	1053.22	122.267	1059.33	110.706	1059.68	110.077	1054.46	105.467	1053.62	89.9529	1056.09	91.7515	1056.27	88.7784	1056.55	85.8051
	1054.22	123.682	1060.33	111.161	1060.68	109.117	1055.46	104.57	1054.62	90.0559	1057.09	90.1439	1057.27	88.7673	1057.55	86.8229
	1055.22	124.397	1061.33	111.444	1061.68	109.161	1056.46	104.82	1055.62	89.3801	1058.09	91.4607	1058.27	88.1995	1058.55	86.0015
	1056.22	122.929	1062.33	111.126	1062.68	109.522	1057.46	104.93	1056.62	89.8439	1059.09	90.6367	1059.27	88.4698	1059.55	86.5451
	1057.22	123.249	1063.33	110.734	1063.68	110.066	1058.46	103.815	1057.62	89.8793	1060.09	92.3956	1060.27	88.3428	1060.55	85.54
	1058.22	122.762	1064.33	111.549	1064.68	109.664	1059.46	104.287	1058.62	90.7525	1061.09	92.3737	1061.27	88.3774	1061.55	85.5296
	1059.22	123.769	1065.33	111.893	1065.68	108.885	1060.46	104.97	1059.62	89.8663	1062.09	91.8821	1062.27	87.8252	1062.55	86.4902
	1060.22	123.193	1066.33	111.593	1066.68	109.161	1061.46	104.574	1060.62	90.1719	1063.09	92.7684	1063.27	89.2067	1063.55	86.3313
	1061.22	123.493	1067.33	110.57	1067.68	108.534	1062.46	104.821	1061.62	90.3407	1064.09	91.6662	1064.27	87.2385	1064.55	85.7053
	1062.22	123.521	1068.33	111.215	1068.68	109.608	1063.46	104.309	1062.62	90.1431	1065.09	90.4407	1065.27	88.4522	1065.55	86.0622
	1063.22	123.136	1069.33	111.628	1069.68	109.643	1064.46	103.428	1063.62	90.4111	1066.09	91.6763	1066.27	88.4043	1066.55	85.7932
	1064.22	125.049	1070.33	111.527	1070.68	109.197	1065.46	104.854	1064.62	90.3946	1067.09	91.3698	1067.27	88.8826	1067.55	85.8749
	1065.22	122.871	1071.33	112.16	1071.68	109.46	1066.46	105.009	1065.62	90.6086	1068.09	91.5711	1068.27	87.9627	1068.55	85.6648
	1066.22	124.111	1072.33	110.572	1072.68	110.159	1067.46	104.374	1066.62	89.9907	1069.09	91.4345	1069.27	87.9305	1069.55	86.2859
	1067.22	121.801	1073.33	111.989	1073.68	108.492	1068.46	104.386	1067.62	89.3226	1070.09	91.86	1070.27	88.9042	1070.55	85.5086
	1068.22	123.357	1074.33	111.575	1074.68	108.705	1069.46	104.732	1068.62	89.9481	1071.09	92.4028	1071.27	88.2048	1071.55	86.3332
	1069.22	123.053	1075.33	112.21	1075.68	110.001	1070.46	104.837	1069.62	90.0888	1072.09	92.0151	1072.27	89.6988	1072.55	84.975
	1070.22	123.573	1076.33	112.656	1076.68	109.131	1071.46	103.813	1070.62	89.9859	1073.09	91.2192	1073.27	87.643	1073.55	86.0839
	1071.22	123.62	1077.33	112.118	1077.68	109.751	1072.46	104.847	1071.62	90.3496	1074.09	91.9181	1074.27	88.9457	1074.55	86.4156
	1072.22	123.84	1078.33	111.4	1078.68	109.109	1073.46	104.261	1072.62	90.4244	1075.09	92.3509	1075.27	87.9668	1075.55	86.5658
	1073.22	122.888	1079.33	111.311	1079.68	109.661	1074.46	104.765	1073.62	90.4995	1076.09	91.9688	1076.27	88.2608	1076.55	86.6576
	1074.22	123.524	1080.33	112.282	1080.68	109.533	1075.46	104.525	1074.62	90.8505	1077.09	91.6511	1077.27	88.4479	1077.55	87.6315
	1075.22	123.389	1081.33	111.453	1081.68	109.429	1076.46	105.133	1075.62	90.8285	1078.09	91.7834	1078.27	88.6021	1078.55	86.0061
	1076.22	122.798	1082.33	111.991	1082.68	109.133	1077.46	105.902	1076.62	90.0701	1079.09	92.5081	1079.27	88.4899	1079.55	86.3375
	1077.22	124.058	1083.33	111.19	1083.68	109.634	1078.46	105.02	1077.62	90.859	1080.09	91.6274	1080.27	86.6209	1080.55	86.1232
	1078.22	122.911	1084.33	111.223	1084.68	109.827	1079.46	104.311	1078.62	89.6434	1081.09	92.2469	1081.27	88.0271	1081.55	85.9701
	1079.22	124.007	1085.33	112.225	1085.68	109.695	1080.46	105.249	1079.62	90.39	1082.09	91.4643	1082.27	88.8197	1082.55	85.6421
	1080.22	124.057	1086.33	112.586	1086.68	109.31	1081.46	105.284	1080.62	89.4076	1083.09	91.3608	1083.27	88.3141	1083.55	86.7625
	1081.22	123.518	1087.33	111.759	1087.68	110.308	1082.46	105.805	1081.62	90.2966	1084.09	91.5285	1084.27	88.3337	1084.55	85.5617
	1082.22	123.38	1088.33	112.863	1088.68	109.771	1083.46	104.648	1082.62	90.0844	1085.09	91.9489	1085.27	89.4741	1085.55	87.0577
	1083.22	122.159	1089.33	111.188	1089.68	110.611	1084.46	105.718	1083.62	90.3823	1086.09	91.4553	1086.27	89.1934	1086.55	86.4494
	1084.22	123.131	1090.33	111.933	1090.68	109.927	1085.46	105.219	1084.62	90.6736	1087.09	92.57	1087.27	88.2361	1087.55	86.3642
	1085.22	124.436	1091.33	112.228	1091.68	109.655	1086.46	104.707	1085.62	90.6278	1088.09	92.3108	1088.27	88.0426	1088.55	87.0771
	1086.22	123.361	1092.33	111.24	1092.68	109.771	1087.46	104.469	1086.62	89.2884	1089.09	92.1477	1089.27	87.8751	1089.55	86.8274
	1087.22	124.718	1093.33	112.168	1093.68	109.809	1088.46	105.247	1087.62	90.2614	1090.09	91.1671	1090.27	88.3353	1090.55	86.302
	1088.22	124.32	1094.33	111.527	1094.68	110.272	1089.46	105.574	1088.62	89.8557	1091.09	92.7124	1091.27	87.5068	1091.55	86.3826
	1089.22	123.073	1095.33	111.814	1095.68	109.854	1090.46	105.246	1089.62	90.7944	1092.09	92.0861	1092.27	87.9616	1092.55	87.0594
	1090.22	124.486	1096.33	111.15	1096.68	109.75	1091.46	104.78	1090.62	90.7271	1093.09	91.5386	1093.27	87.8536	1093.55	86.4969
	1091.22	123.943	1097.33	111.852	1097.68	109.72	1092.46	105.503	1091.62	89.9402	1094.09	91.9508	1094.27	87.8419	1094.55	86.8513
	1092.22	123.323	1098.33	111.938	1098.68	110.563	1093.46	106.199	1092.62	91.125	1095.09	92.7298	1095.27	88.3712	1095.55	86.2872
	1093.22	124.622	1099.33	112.959	1099.68	109.417	1094.46	105.512	1093.62	91.0377	1096.09	91.5617	1096.27	88.2041	1096.55	85.9524
	1094.22	123.786	1100.33	112.283	1100.68	109.555	1095.46	104.983	1094.62	90.4882	1097.09	91.9864	1097.27	88.1642	1097.55	86.524
	1095.22	124.096	1101.33	111.671	1101.68	110.38	1096.46	105.156	1095.62	90.7991	1098.09	91.5464	1098.27	88.1717	1098.55	85.2398
	1096.22	123.605	1102.33	112.171	1102.68	110.116	1097.46	106.204	1096.62	89.6776	1099.09	92.2436	1099.27	87.9668	1099.55	86.451
	1097.22	124.245	1103.33	112.825	1103.68	111.013	1098.46	105.07	1097.62	90.3755	1100.09	92.3809	1100.27	89.0632	1100.55	85.9025
	1098.22	124.683	1104.33	111.52	1104.68	111.211	1099.46	104.993	1098.62	90.8239	1101.09	92.4444	1101.27	88.4802	1101.55	86.3549
	1099.22	123.632	1105.33	113.154	1105.68	110.823	1100.46	105.923	1099.62	90.597	1102.09	92.9166	1102.27	88.3129	1102.55	85.8924
	1100.22	123.573	1106.33	111.059	1106.68	110.801	1101.46	106.098	1100.62	90.4128	1103.09	90.9678	1103.27	88.1368	1103.55	86.8419
	1101.22	124.391	1107.33	112.949	1107.68	110.854	1102.46	105.388	1101.62	90.1545	1104.09	92.1946	1104.27	88.6331	1104.55	86.1746
	1102.22	124.545	1108.33	112.293	1108.68	109.829	1103.46	105.606	1102.62	90.6127	1105.09	91.5074	1105.27	88.0187	1105.55	86.4151
	1103.22	123.75	1109.33	111.398	1109.68	109.388	1104.46	104.215	1103.62	91.2842	1106.09	91.9671	1106.27	88.4968	1106.55	86.808
	1104.22	124.572	1110.33	112.873	1110.68	110.321	1105.46	104.619	1104.62	90.4369	1107.09	92.5582	1107.27	87.5214	1107.55	86.2963
	1105.22	123.411	1111.33	113.181	1111.68	109.822	1106.46	105.244	1105.62	90.643	1108.09	91.4867	1108.27	88.4077	1108.55	86.1946
	1106.22	123.517	1112.33	111.798	1112.68	110.712	1107.46	105.155	1106.62	90.4001	1109.09	92.8006	1109.27	88.8256	1109.55	87.8616
	1107.22	123.737	1113.33	112.525	1113.68	110.517	1108.46	105.475	1107.62	90.5174	1110.09	92.5576	1110.27	88.0058	1110.55	85.9943
	1108.22	123.275	1114.33	112.243	1114.68	110.078	1109.46	105.321	1108.62	90.4033	1111.09	92.1085	1111.27	88.2576	1111.55	86.0827
	1109.22	124.347	1115.33	112.561	1115.68	110.509	1110.46	105.908	1109.62	89.5763	1112.09	91.7542	1112.27	88.0292	1112.55	85.768
	1110.22	124.407	1116.33	113.037	1116.68	110.516	1111.46	105.303	1110.62	90.1054	1113.09	92.6517	1113.27	89.2822	1113.55	87.2546
	1111.22	124.127	1117.33	111.874	1117.68	110.33	1112.46	105.228	1111.62	90.0928	1114.09	91.9804	1114.27	88.2963	1114.55	87.0582
	1112.22	123.387	1118.33	113.549	1118.68	109.04	1113.46	105.458	1112.62	90.4392	1115.09	91.9674	1115.27	88.2577	1115.55	86.5374
	1113.22	122.937	1119.33	111.755	1119.68	110.295	1114.46	106.21	1113.62	90.2682	1116.09	91.5752	1116.27	88.0874	1116.55	85.7849
	1114.22	125.017	1120.33	112.97	1120.68	111.525	1115.46	105.57	1114.62	91.1178	1117.09	91.5942	1117.27	87.993	1117.55	86.871
	1115.22	122.837	1121.33	113.645	1121.68	110.974	1116.46	105.101	1115.62	90.6433	1118.09	92.1438	1118.27	87.8771	1118.55	86.4098
	1116.22	122.928	1122.33	112.442	1122.68	110.283	1117.46	105.948	1116.62	91.0755	1119.09	92.1872	1119.27	88.3048	1119.55	86.7977
	1117.22	124.453	1123.33	112.7	1123.68	110.947	1118.46	105.069	1117.62	90.0291	1120.09	92.4297	1120.27	88.2561	1120.55	86.1761
	1118.22	123.804	1124.33	113.115	1124.68	110.552	1119.46	105.012	1118.62	91.3501	1121.09	92.7541	1121.27	87.7691	1121.55	86.3135
	1119.22	123.829	1125.33	112.212	1125.68	110.817	1120.46	104.561	1119.62	90.3756	1122.09	91.8296	1122.27	89.2209	1122.55	86.3174
	1120.22	124.141	1126.33	112.254	1126.68	110.268	1121.46	104.69	1120.62	89.8334	1123.09	92.3952	1123.27	88.4799	1123.55	85.7641
	1121.22	123.102	1127.33	112.301	1127.68	110.49	1122.46	105.049	1121.62	90.9365	1124.09	92.1205	1124.27	88.6978	1124.55	86.1748
	1122.22	123.833	1128.33	112.595	1128.68	110.169	1123.46	106.236	1122.62	90.4143	1125.09	92.676	1125.27	87.7774	1125.55	86.1808
	1123.22	124.055	1129.33	113.211	1129.68	110.297	1124.46	104.929	1123.62	89.7563	1126.09	91.2856	1126.27	88.8529	1126.55	85.2198
	1124.22	124.313	1130.33	112.675	1130.68	109.73	1125.46	106.545	1124.62	91.0119	1127.09	92.4271	1127.27	88.8354	1127.55	85.672
	1125.22	124.903	1131.33	112.409	1131.68	110.903	1126.46	106.677	1125.62	90.927	1128.09	92.5644	1128.27	88.1809	1128.55	85.7919
	1126.22	124.822	1132.33	112.935	1132.68	111.072	1127.46	105.513	1126.62	90.6902	1129.09	92.3409	1129.27	88.7519	1129.55	87.16
	1127.22	124.316	1133.33	112.701	1133.68	110.661	1128.46	105.483	1127.62	90.8766	1130.09	92.9142	1130.27	88.8343	1130.55	87.0541
	1128.22	124.968	1134.33	112.545	1134.68	110.844	1129.46	106.181	1128.62	90.487	1131.09	92.1448	1131.27	88.3109	1131.55	86.7397
	1129.22	123.593	1135.33	112.321	1135.68	110.727	1130.46	105.307	1129.62	89.6495	1132.09	92.3577	1132.27	87.5999	1132.55	86.0595
	1130.22	124.88	1136.33	113.614	1136.68	111.112	1131.46	104.342	1130.62	90.3323	1133.09	92.5448	1133.27	87.7995	1133.55	86.1464
	1131.22	124.525	1137.33	113.078	1137.68	110.894	1132.46	105.468	1131.62	90.5487	1134.09	92.7289	1134.27	88.7268	1134.55	85.9129
	1132.22	125.075	1138.33	113.29	1138.68	110.884	1133.46	106.38	1132.62	90.5479	1135.09	91.9657	1135.27	88.397	1135.55	86.5561
	1133.22	123.597	1139.33	113.057	1139.68	109.873	1134.46	105.406	1133.62	90.3843	1136.09	91.1583	1136.27	88.3267	1136.55	86.2455
	1134.22	123.898	1140.33	112.286	1140.68	110.651	1135.46	106.008	1134.62	90.2138	1137.09	92.3853	1137.27	88.8644	1137.55	85.9098
	1135.22	125.004	1141.33	112.231	1141.68	110.485	1136.46	105.162	1135.62	90.285	1138.09	91.7375	1138.27	89.0951	1138.55	87.4371
	1136.22	124.692	1142.33	112.838	1142.68	111.663	1137.46	105.402	1136.62	89.9217	1139.09	91.2061	1139.27	88.5307	1139.55	86.8692
	1137.22	124.846	1143.33	113.626	1143.68	112.088	1138.46	104.741	1137.62	90.9041	1140.09	92.2433	1140.27	88.8232	1140.55	85.6337
	1138.22	125.496	1144.33	112.443	1144.68	110.363	1139.46	105.035	1138.62	91.3584	1141.09	92.207	1141.27	87.4024	1141.55	85.9075
	1139.22	124.434	1145.33	112.752	1145.68	110.571	1140.46	104.521	1139.62	90.3449	1142.09	92.9352	1142.27	88.6682	1142.55	86.3212
	1140.22	124.683	1146.33	112.974	1146.68	111.519	1141.46	105.645	1140.62	90.6867	1143.09	92.1994	1143.27	88.11	1143.55	86.0408
	1141.22	124.288	1147.33	112.76	1147.68	111.346	1142.46	106.161	1141.62	91.2368	1144.09	92.0786	1144.27	88.6671	1144.55	86.7274
	1142.22	124.754	1148.33	113.788	1148.68	111.634	1143.46	105.317	1142.62	90.089	1145.09	92.4435	1145.27	89.0495	1145.55	86.1654
	1143.22	124.325	1149.33	113.033	1149.68	110.329	1144.46	106.623	1143.62	90.4288	1146.09	91.8332	1146.27	89.133	1146.55	85.8786
	1144.22	124.629	1150.33	113.092	1150.68	111.003	1145.46	105.894	1144.62	90.4141	1147.09	91.6171	1147.27	87.7263	1147.55	86.2069
	1145.22	125.452	1151.33	112.745	1151.68	111.367	1146.46	105.094	1145.62	90.4698	1148.09	92.7487	1148.27	88.815	1148.55	86.675
	1146.22	124.815	1152.33	113.125	1152.68	111.178	1147.46	106.24	1146.62	91.7067	1149.09	92.7259	1149.27	88.689	1149.55	85.7835
	1147.22	124.092	1153.33	112.653	1153.68	111.479	1148.46	104.962	1147.62	90.8048	1150.09	92.9513	1150.27	88.9517	1150.55	86.4561
	1148.22	125.841	1154.33	113.568	1154.68	110.207	1149.46	105.465	1148.62	90.7691	1151.09	92.1599	1151.27	88.3355	1151.55	86.3978
	1149.22	125.311	1155.33	112.638	1155.68	111.035	1150.46	104.895	1149.62	91.2598	1152.09	92.8362	1152.27	88.3163	1152.55	86.1488
	1150.22	124.256	1156.33	112.331	1156.68	110.844	1151.46	105.824	1150.62	91.4751	1153.09	91.5454	1153.27	88.5432	1153.55	86.244
	1151.22	124.461	1157.33	113.904	1157.68	110.757	1152.46	105.305	1151.62	90.9398	1154.09	92.0644	1154.27	88.5005	1154.55	85.808
	1152.22	124.611	1158.33	113.074	1158.68	112.178	1153.46	106.918	1152.62	91.3826	1155.09	91.8689	1155.27	88.4706	1155.55	86.6183
	1153.22	124.649	1159.33	112.664	1159.68	111.081	1154.46	106.833	1153.62	91.2099	1156.09	91.7883	1156.27	88.5284	1156.55	86.0003
	1154.22	125.345	1160.33	114.063	1160.68	111.125	1155.46	105.076	1154.62	90.6668	1157.09	92.3643	1157.27	88.5611	1157.55	86.5169
	1155.22	124.318	1161.33	114.549	1161.68	111.565	1156.46	105.742	1155.62	91.2905	1158.09	92.5136	1158.27	87.6425	1158.55	86.0715
	1156.22	125.266	1162.33	112.942	1162.68	111.836	1157.46	105.848	1156.62	91.2576	1159.09	92.7008	1159.27	88.4212	1159.55	87.0788
	1157.22	124.788	1163.33	113.985	1163.68	110.5	1158.46	105.897	1157.62	91.0887	1160.09	93.0365	1160.27	88.5069	1160.55	86.8746
	1158.22	124.968	1164.33	113.121	1164.68	111.224	1159.46	106.707	1158.62	90.3765	1161.09	92.2236	1161.27	88.2907	1161.55	85.6586
	1159.22	125.45	1165.33	114.443	1165.68	111.263	1160.46	106.611	1159.62	90.8635	1162.09	92.5114	1162.27	88.4818	1162.55	85.9553
	1160.22	125.642	1166.33	113.554	1166.68	112.126	1161.46	105.755	1160.62	91.843	1163.09	91.81	1163.27	88.9517	1163.55	86.3053
	1161.22	124.555	1167.33	113.384	1167.68	111.66	1162.46	105.909	1161.62	91.2057	1164.09	91.9264	1164.27	88.424	1164.55	85.9771
	1162.22	124.458	1168.33	113.518	1168.68	110.865	1163.46	106.433	1162.62	90.3397	1165.09	92.1858	1165.27	87.5713	1165.55	86.1874
	1163.22	125.116	1169.33	114.076	1169.68	111.157	1164.46	105.836	1163.62	90.7675	1166.09	92.7984	1166.27	89.2026	1166.55	87.5713
	1164.22	125.941	1170.33	113.573	1170.68	111.045	1165.46	105.506	1164.62	90.0782	1167.09	93.2835	1167.27	88.4665	1167.55	86.1345
	1165.22	125.304	1171.33	112.715	1171.68	111.673	1166.46	106.828	1165.62	91.7461	1168.09	91.8158	1168.27	88.3085	1168.55	86.9449
	1166.22	124.289	1172.33	114.205	1172.68	111.429	1167.46	106.164	1166.62	91.2057	1169.09	91.5633	1169.27	87.9862	1169.55	86.4626
	1167.22	123.323	1173.33	113.836	1173.68	111.595	1168.46	106.692	1167.62	89.9088	1170.09	91.8114	1170.27	87.5732	1170.55	86.7477
	1168.22	125.753	1174.33	113.363	1174.68	111.327	1169.46	106.079	1168.62	91.046	1171.09	92.0918	1171.27	88.281	1171.55	86.6127
	1169.22	125.897	1175.33	114.226	1175.68	111.562	1170.46	106.039	1169.62	90.9388	1172.09	92.5984	1172.27	88.3289	1172.55	86.7114
	1170.22	125.033	1176.33	112.362	1176.68	111.576	1171.46	105.942	1170.62	90.4437	1173.09	92.4854	1173.27	88.3024	1173.55	86.1638
	1171.22	125.113	1177.33	113.058	1177.68	111.277	1172.46	106.569	1171.62	90.6617	1174.09	91.7626	1174.27	88.8106	1174.55	86.4822
	1172.22	125.175	1178.33	113.651	1178.68	110.764	1173.46	105.529	1172.62	90.4475	1175.09	92.7972	1175.27	88.2753	1175.55	85.4357
	1173.22	125.466	1179.33	112.861	1179.68	111.476	1174.46	105.599	1173.62	91.4281	1176.09	91.2732	1176.27	88.9886	1176.55	86.1098
	1174.22	124.976	1180.33	113.737	1180.68	111.628	1175.46	106.744	1174.62	90.9998	1177.09	92.9021	1177.27	88.4514	1177.55	86.3079
	1175.22	125.195	1181.33	115.04	1181.68	111.668	1176.46	105.837	1175.62	91.7267	1178.09	92.4708	1178.27	89.026	1178.55	85.9692
	1176.22	124.844	1182.33	113.059	1182.68	111.814	1177.46	105.492	1176.62	90.7237	1179.09	91.7177	1179.27	87.6179	1179.55	86.7415
	1177.22	125.263	1183.33	113.676	1183.68	111.695	1178.46	106.056	1177.62	90.5794	1180.09	92.1997	1180.27	88.3724	1180.55	86.3701
	1178.22	125.503	1184.33	113.623	1184.68	112.396	1179.46	106.079	1178.62	90.6254	1181.09	92.9632	1181.27	88.2474	1181.55	85.5225
	1179.22	124.355	1185.33	112.906	1185.68	112.71	1180.46	106.189	1179.62	90.5557	1182.09	92.973	1182.27	88.5278	1182.55	86.2587
	1180.22	125.945	1186.33	113.909	1186.68	111.488	1181.46	105.68	1180.62	91.4598	1183.09	92.3557	1183.27	88.1928	1183.55	86.3793
	1181.22	126.021	1187.33	114.424	1187.68	111.955	1182.46	105.903	1181.62	91.1259	1184.09	92.6288	1184.27	89.4286	1184.55	86.6401
	1182.22	125.946	1188.33	113.645	1188.68	111.947	1183.46	105.829	1182.62	90.9096	1185.09	92.32	1185.27	88.1392	1185.55	86.8158
	1183.22	125.137	1189.33	113.834	1189.68	112.132	1184.46	107.024	1183.62	91.9935	1186.09	92.6142	1186.27	88.2146	1186.55	86.8552
	1184.22	125.939	1190.33	114.233	1190.68	112.889	1185.46	106.512	1184.62	90.4877	1187.09	92.6455	1187.27	87.6139	1187.55	86.2849
	1185.22	125.649	1191.33	113.581	1191.68	112.094	1186.46	107.13	1185.62	90.6942	1188.09	92.3823	1188.27	89.1579	1188.55	86.105
	1186.22	125.911	1192.33	114.85	1192.68	112.445	1187.46	105.291	1186.62	91.337	1189.09	93.1794	1189.27	88.5301	1189.55	86.8127
	1187.22	125.461	1193.33	113.668	1193.68	112.121	1188.46	106.345	1187.62	91.4506	1190.09	92.129	1190.27	88.3504	1190.55	87.2913
	1188.22	126.011	1194.33	115.009	1194.68	112.224	1189.46	105.374	1188.62	90.9957	1191.09	93.0662	1191.27	87.8736	1191.55	85.9742
	1189.22	126.554	1195.33	114.162	1195.68	112.646	1190.46	106.553	1189.62	90.7796	1192.09	92.2794	1192.27	88.756	1192.55	85.9937
	1190.22	126.132	1196.33	113.126	1196.68	111.776	1191.46	106.486	1190.62	90.8758	1193.09	92.7308	1193.27	88.8286	1193.55	86.7204
	1191.22	126.974	1197.33	114.282	1197.68	111.732	1192.46	106.806	1191.62	90.4674	1194.09	92.3304	1194.27	88.3852	1194.55	86.4094
	1192.22	125.025	1198.33	114.31	1198.68	112.295	1193.46	105.906	1192.62	91.425	1195.09	92.0946	1195.27	88.3044	1195.55	86.4745
	1193.22	126.326	1199.33	114.651	1199.68	111.838	1194.46	105.803	1193.62	91.8737	1196.09	91.9672	1196.27	87.9408	1196.55	86.7298
	1194.22	126.468	1200.33	114.395	1200.68	111.479	1195.46	106.901	1194.62	90.8808	1197.09	91.7887	1197.27	87.6505	1197.55	85.9441
	1195.22	125.982					1196.46	106.847	1195.62	91.4714	1198.09	92.575	1198.27	89.0079	1198.55	87.518
	1196.22	125.901					1197.46	107.733	1196.62	91.5178	1199.09	92.3803	1199.27	88.1167	1199.55	87.2215
	1197.22	126.839					1198.46	106.202	1197.62	91.7976	1200.09	91.8091	1200.27	89.3239	1200.55	85.4477
	1198.22	125.803					1199.46	107.592	1198.62	91.4108
	1199.22	125.796					1200.46	106.278	1199.62	91.276
	1200.22	124.465							1200.62	90.7747
	RecBCD Control		5-9 2nM		5-9 5nM		5-9 10nM		5-9 20nM		5-9 50nM		5-9 100nM		5-9 500nM
	RecBCD Control		5-9 2nM		5-9 5nM		5-9 10nM		5-9 20nM		5-9 50nM		5-9 100nM		5-9 500nM
	Collection Time: 28/02/2020 11:12:26		Collection Time: 28/02/2020 14:01:44		Collection Time: 28/02/2020 14:27:24		Collection Time: 28/02/2020 11:35:18		Collection Time: 28/02/2020 15:16:25		Collection Time: 28/02/2020 12:47:25		Collection Time: 28/02/2020 11:59:50		Collection Time: 28/02/2020 13:27:26
	Operator Name :		Operator Name :		Operator Name :		Operator Name :		Operator Name :		Operator Name :		Operator Name :		Operator Name :
	Kinetics Software Version: 1.1(133)		Kinetics Software Version: 1.1(133)		Kinetics Software Version: 1.1(133)		Kinetics Software Version: 1.1(133)		Kinetics Software Version: 1.1(133)		Kinetics Software Version: 1.1(133)		Kinetics Software Version: 1.1(133)		Kinetics Software Version: 1.1(133)
	Parameter List :		Parameter List :		Parameter List :		Parameter List :		Parameter List :		Parameter List :		Parameter List :		Parameter List :
	Report Time: Fri 28 Feb 11:12:26 AM 2020		Report Time: Fri 28 Feb 02:01:44 PM 2020		Report Time: Fri 28 Feb 02:27:24 PM 2020		Report Time: Fri 28 Feb 11:35:18 AM 2020		Report Time: Fri 28 Feb 03:16:25 PM 2020		Report Time: Fri 28 Feb 12:47:25 PM 2020		Report Time: Fri 28 Feb 11:59:50 AM 2020		Report Time: Fri 28 Feb 01:27:26 PM 2020
	Software version: 1.1(133)		Software version: 1.1(133)		Software version: 1.1(133)		Software version: 1.1(133)		Software version: 1.1(133)		Software version: 1.1(133)		Software version: 1.1(133)		Software version: 1.1(133)
	Operator:		Operator:		Operator:		Operator:		Operator:		Operator:		Operator:		Operator:
	Instrument Parameters		Instrument Parameters		Instrument Parameters		Instrument Parameters		Instrument Parameters		Instrument Parameters		Instrument Parameters		Instrument Parameters
	Instrument Cary Eclipse		Instrument Cary Eclipse		Instrument Cary Eclipse		Instrument Cary Eclipse		Instrument Cary Eclipse		Instrument Cary Eclipse		Instrument Cary Eclipse		Instrument Cary Eclipse
	Instrument Serial Number EL07063152		Instrument Serial Number EL07063152		Instrument Serial Number EL07063152		Instrument Serial Number EL07063152		Instrument Serial Number EL07063152		Instrument Serial Number EL07063152		Instrument Serial Number EL07063152		Instrument Serial Number EL07063152
	Data mode Fluorescence		Data mode Fluorescence		Data mode Fluorescence		Data mode Fluorescence		Data mode Fluorescence		Data mode Fluorescence		Data mode Fluorescence		Data mode Fluorescence
	Ex. wavelength (nm) 430.00		Ex. wavelength (nm) 430.00		Ex. wavelength (nm) 430.00		Ex. wavelength (nm) 430.00		Ex. wavelength (nm) 430.00		Ex. wavelength (nm) 430.00		Ex. wavelength (nm) 430.00		Ex. wavelength (nm) 430.00
	Em. wavelength (nm) 475.00		Em. wavelength (nm) 475.00		Em. wavelength (nm) 475.00		Em. wavelength (nm) 475.00		Em. wavelength (nm) 475.00		Em. wavelength (nm) 475.00		Em. wavelength (nm) 475.00		Em. wavelength (nm) 475.00
	Ex. Slit (nm) 10		Ex. Slit (nm) 10		Ex. Slit (nm) 10		Ex. Slit (nm) 10		Ex. Slit (nm) 10		Ex. Slit (nm) 10		Ex. Slit (nm) 10		Ex. Slit (nm) 10
	Em. Slit (nm) 5		Em. Slit (nm) 5		Em. Slit (nm) 5		Em. Slit (nm) 5		Em. Slit (nm) 5		Em. Slit (nm) 5		Em. Slit (nm) 5		Em. Slit (nm) 5
	Averaging Time (s) 1.0000		Averaging Time (s) 1.0000		Averaging Time (s) 1.0000		Averaging Time (s) 1.0000		Averaging Time (s) 1.0000		Averaging Time (s) 1.0000		Averaging Time (s) 1.0000		Averaging Time (s) 1.0000
	Cycle time(s) 0.0000		Cycle time(s) 0.0000		Cycle time(s) 0.0000		Cycle time(s) 0.0000		Cycle time(s) 0.0000		Cycle time(s) 0.0000		Cycle time(s) 0.0000		Cycle time(s) 0.0000
	Stop time(s) 1200.0000		Stop time(s) 1200.0000		Stop time(s) 1200.0000		Stop time(s) 1200.0000		Stop time(s) 1200.0000		Stop time(s) 1200.0000		Stop time(s) 1200.0000		Stop time(s) 1200.0000
	Emission filter Open		Emission filter Open		Emission filter Open		Emission filter Open		Emission filter Open		Emission filter Open		Emission filter Open		Emission filter Open
	Excitation Filter Auto		Excitation Filter Auto		Excitation Filter Auto		Excitation Filter Auto		Excitation Filter Auto		Excitation Filter Auto		Excitation Filter Auto		Excitation Filter Auto
	PMT voltage (V) High		PMT voltage (V) High		PMT voltage (V) High		PMT voltage (V) High		PMT voltage (V) High		PMT voltage (V) High		PMT voltage (V) High		PMT voltage (V) High
	Comments:		Comments:		Comments:		Comments:		Comments:		Comments:		Comments:		Comments:
	Method Log :		Method Log :		Method Log :		Method Log :		Method Log :		Method Log :		Method Log :		Method Log :
	Method Name : C:\Documents and Settings\eclipse\My Documents\Eclipse_Users\Emma&Emma\AddAB Reaction Improved.FMKN		Method Name : C:\Documents and Settings\eclipse\My Documents\Eclipse_Users\Emma&Emma\AddAB Reaction Improved.FMKN		Method Name : C:\Documents and Settings\eclipse\My Documents\Eclipse_Users\Emma&Emma\AddAB Reaction Improved.FMKN		Method Name : C:\Documents and Settings\eclipse\My Documents\Eclipse_Users\Emma&Emma\AddAB Reaction Improved.FMKN		Method Name : C:\Documents and Settings\eclipse\My Documents\Eclipse_Users\Emma&Emma\AddAB Reaction Improved.FMKN		Method Name : C:\Documents and Settings\eclipse\My Documents\Eclipse_Users\Emma&Emma\AddAB Reaction Improved.FMKN		Method Name : C:\Documents and Settings\eclipse\My Documents\Eclipse_Users\Emma&Emma\AddAB Reaction Improved.FMKN		Method Name : C:\Documents and Settings\eclipse\My Documents\Eclipse_Users\Emma&Emma\AddAB Reaction Improved.FMKN
	Date/Time stamp: 26/02/2020 12:10:23		Date/Time stamp: 26/02/2020 12:10:23		Date/Time stamp: 26/02/2020 12:10:23		Date/Time stamp: 26/02/2020 12:10:23		Date/Time stamp: 26/02/2020 12:10:23		Date/Time stamp: 26/02/2020 12:10:23		Date/Time stamp: 26/02/2020 12:10:23		Date/Time stamp: 26/02/2020 12:10:23
	Method Modifications:		Method Modifications:		Method Modifications:		Method Modifications:		Method Modifications:		Method Modifications:		Method Modifications:		Method Modifications:
	Excitation Wavelength Changed: 21/02/2020 15:10:08	Old: 400.00	Excitation Wavelength Changed: 21/02/2020 15:10:08	Old: 400.00	Excitation Wavelength Changed: 21/02/2020 15:10:08	Old: 400.00	Excitation Wavelength Changed: 21/02/2020 15:10:08	Old: 400.00	Excitation Wavelength Changed: 21/02/2020 15:10:08	Old: 400.00	Excitation Wavelength Changed: 21/02/2020 15:10:08	Old: 400.00	Excitation Wavelength Changed: 21/02/2020 15:10:08	Old: 400.00	Excitation Wavelength Changed: 21/02/2020 15:10:08	Old: 400.00
	Emission Wavelength Changed: 21/02/2020 15:10:08	Old: 600.00	Emission Wavelength Changed: 21/02/2020 15:10:08	Old: 600.00	Emission Wavelength Changed: 21/02/2020 15:10:08	Old: 600.00	Emission Wavelength Changed: 21/02/2020 15:10:08	Old: 600.00	Emission Wavelength Changed: 21/02/2020 15:10:08	Old: 600.00	Emission Wavelength Changed: 21/02/2020 15:10:08	Old: 600.00	Emission Wavelength Changed: 21/02/2020 15:10:08	Old: 600.00	Emission Wavelength Changed: 21/02/2020 15:10:08	Old: 600.00
	Ex. Slit Width (nm): Changed: 21/02/2020 15:10:08	Old:5	Ex. Slit Width (nm): Changed: 21/02/2020 15:10:08	Old:5	Ex. Slit Width (nm): Changed: 21/02/2020 15:10:08	Old:5	Ex. Slit Width (nm): Changed: 21/02/2020 15:10:08	Old:5	Ex. Slit Width (nm): Changed: 21/02/2020 15:10:08	Old:5	Ex. Slit Width (nm): Changed: 21/02/2020 15:10:08	Old:5	Ex. Slit Width (nm): Changed: 21/02/2020 15:10:08	Old:5	Ex. Slit Width (nm): Changed: 21/02/2020 15:10:08	Old:5
	X mode Changed: 21/02/2020 15:10:08	Old:min	X mode Changed: 21/02/2020 15:10:08	Old:min	X mode Changed: 21/02/2020 15:10:08	Old:min	X mode Changed: 21/02/2020 15:10:08	Old:min	X mode Changed: 21/02/2020 15:10:08	Old:min	X mode Changed: 21/02/2020 15:10:08	Old:min	X mode Changed: 21/02/2020 15:10:08	Old:min	X mode Changed: 21/02/2020 15:10:08	Old:min
	Ave. time (s): Changed: 21/02/2020 15:10:08	Old:0.10000	Ave. time (s): Changed: 21/02/2020 15:10:08	Old:0.10000	Ave. time (s): Changed: 21/02/2020 15:10:08	Old:0.10000	Ave. time (s): Changed: 21/02/2020 15:10:08	Old:0.10000	Ave. time (s): Changed: 21/02/2020 15:10:08	Old:0.10000	Ave. time (s): Changed: 21/02/2020 15:10:08	Old:0.10000	Ave. time (s): Changed: 21/02/2020 15:10:08	Old:0.10000	Ave. time (s): Changed: 21/02/2020 15:10:08	Old:0.10000
	Stop Time 1 Changed: 21/02/2020 15:10:08	Old: 1.0000	Stop Time 1 Changed: 21/02/2020 15:10:08	Old: 1.0000	Stop Time 1 Changed: 21/02/2020 15:10:08	Old: 1.0000	Stop Time 1 Changed: 21/02/2020 15:10:08	Old: 1.0000	Stop Time 1 Changed: 21/02/2020 15:10:08	Old: 1.0000	Stop Time 1 Changed: 21/02/2020 15:10:08	Old: 1.0000	Stop Time 1 Changed: 21/02/2020 15:10:08	Old: 1.0000	Stop Time 1 Changed: 21/02/2020 15:10:08	Old: 1.0000
	PMT Volts Changed: 21/02/2020 15:10:26	Old:600	PMT Volts Changed: 21/02/2020 15:10:26	Old:600	PMT Volts Changed: 21/02/2020 15:10:26	Old:600	PMT Volts Changed: 21/02/2020 15:10:26	Old:600	PMT Volts Changed: 21/02/2020 15:10:26	Old:600	PMT Volts Changed: 21/02/2020 15:10:26	Old:600	PMT Volts Changed: 21/02/2020 15:10:26	Old:600	PMT Volts Changed: 21/02/2020 15:10:26	Old:600
	Emission PMT (V): Changed: 21/02/2020 15:10:26	Old: 600	Emission PMT (V): Changed: 21/02/2020 15:10:26	Old: 600	Emission PMT (V): Changed: 21/02/2020 15:10:26	Old: 600	Emission PMT (V): Changed: 21/02/2020 15:10:26	Old: 600	Emission PMT (V): Changed: 21/02/2020 15:10:26	Old: 600	Emission PMT (V): Changed: 21/02/2020 15:10:26	Old: 600	Emission PMT (V): Changed: 21/02/2020 15:10:26	Old: 600	Emission PMT (V): Changed: 21/02/2020 15:10:26	Old: 600
	Stop Time 1 Changed: 25/02/2020 14:47:32	Old:600.0000	Stop Time 1 Changed: 25/02/2020 14:47:32	Old:600.0000	Stop Time 1 Changed: 25/02/2020 14:47:32	Old:600.0000	Stop Time 1 Changed: 25/02/2020 14:47:32	Old:600.0000	Stop Time 1 Changed: 25/02/2020 14:47:32	Old:600.0000	Stop Time 1 Changed: 25/02/2020 14:47:32	Old:600.0000	Stop Time 1 Changed: 25/02/2020 14:47:32	Old:600.0000	Stop Time 1 Changed: 25/02/2020 14:47:32	Old:600.0000
	Stop Time 1 Changed: 26/02/2020 11:49:31	Old:900.0000	Stop Time 1 Changed: 26/02/2020 11:49:31	Old:900.0000	Stop Time 1 Changed: 26/02/2020 11:49:31	Old:900.0000	Stop Time 1 Changed: 26/02/2020 11:49:31	Old:900.0000	Stop Time 1 Changed: 26/02/2020 11:49:31	Old:900.0000	Stop Time 1 Changed: 26/02/2020 11:49:31	Old:900.0000	Stop Time 1 Changed: 26/02/2020 11:49:31	Old:900.0000	Stop Time 1 Changed: 26/02/2020 11:49:31	Old:900.0000
	End Method Modifications		End Method Modifications		End Method Modifications		End Method Modifications		End Method Modifications		End Method Modifications		End Method Modifications		End Method Modifications

## Sheet: Repeat 2
his-gp5.9:	Control		2nM		5nM		10nM		20nM		50nM		100nM		500nM
	Time (s)	Fluoro	Time (s)	Fluoro	Time (s)	Fluoro	Time (s)	Fluoro	Time (s)	Fluoro	Time (s)	Fluoro	Time (s)	Fluoro	Time (s)	Fluoro
	0.5	87.2009	0.5	86.1057	0.5	83.7852	0.5	86.7582	0.5	81.5126	0.5	83.5364	0.5	84.9832	0.5	81.7977
	1.5	87.2284	1.5	86.1997	1.5	85.6716	1.5	87.3466	1.5	82.1987	1.5	84.1148	1.5	85.2636	1.5	83.3993
	2.5	86.6532	2.5	86.4462	2.5	85.2728	2.5	87.3729	2.5	83.6094	2.5	83.1743	2.5	86.0581	2.5	83.1619
	3.5	86.8842	3.5	86.7824	3.5	84.7348	3.5	88.4855	3.5	82.9082	3.5	83.8272	3.5	86.2191	3.5	82.2183
	4.5	87.6941	4.5	87.5956	4.5	85.4627	4.5	87.6259	4.5	83.1459	4.5	83.3916	4.5	85.2776	4.5	83.2194
	5.5	86.3756	5.5	88.0326	5.5	85.0439	5.5	87.4599	5.5	83.3258	5.5	84.3903	5.5	85.9048	5.5	84.046
	6.5	86.4104	6.5	86.4395	6.5	84.7674	6.5	87.9078	6.5	83.8442	6.5	83.3806	6.5	85.2207	6.5	83.9091
	7.5	87.7835	7.5	86.5801	7.5	85.5818	7.5	87.6486	7.5	83.5288	7.5	84.1747	7.5	85.5127	7.5	84.1058
	8.5	87.9531	8.5	87.0923	8.5	85.0857	8.5	87.8049	8.5	82.3681	8.5	84.1391	8.5	85.7922	8.5	84.1595
	9.5	87.8967	9.5	87.2581	9.5	86.2492	9.5	87.5202	9.5	82.5766	9.5	83.1968	9.5	85.5739	9.5	83.666
	10.5	88.4105	10.5	87.0114	10.5	85.0665	10.5	87.5997	10.5	82.8599	10.5	83.0472	10.5	85.8286	10.5	82.5695
	11.5	87.7233	11.5	87.8819	11.5	85.0733	11.5	86.9353	11.5	82.3766	11.5	83.5083	11.5	84.8224	11.5	83.4407
	12.5	88.3952	12.5	87.381	12.5	84.6972	12.5	87.5756	12.5	83.5294	12.5	82.2249	12.5	86.0006	12.5	83.2169
	13.5	87.6161	13.5	87.5586	13.5	84.1652	13.5	87.6603	13.5	83.0007	13.5	83.0496	13.5	85.7207	13.5	83.0049
	14.5	88.4448	14.5	86.519	14.5	85.0359	14.5	87.1178	14.5	83.3382	14.5	83.385	14.5	85.5914	14.5	82.8159
	15.5	87.7214	15.5	87.0812	15.5	85.1928	15.5	87.988	15.5	82.9662	15.5	83.4755	15.5	86.061	15.5	83.5027
	16.5	87.3939	16.5	86.3325	16.5	85.3531	16.5	87.2845	16.5	82.2353	16.5	83.253	16.5	85.1256	16.5	83.052
	17.5	87.7389	17.5	86.6702	17.5	84.6377	17.5	87.0184	17.5	83.5011	17.5	83.6407	17.5	86.3441	17.5	82.9223
	18.5	87.4686	18.5	86.5808	18.5	84.7015	18.5	87.3837	18.5	82.8653	18.5	82.7404	18.5	86.1838	18.5	82.1693
	19.5	87.3074	19.5	86.9197	19.5	84.2158	19.5	87.0834	19.5	83.0554	19.5	83.4165	19.5	85.2519	19.5	82.7963
	20.5	87.8858	20.5	86.7468	20.5	84.2134	20.5	86.8794	20.5	83.9515	20.5	82.9284	20.5	85.6318	20.5	82.656
	21.5	87.8081	21.5	86.6166	21.5	85.4346	21.5	86.7749	21.5	82.4401	21.5	84.3798	21.5	85.8862	21.5	82.554
	22.5	87.6327	22.5	86.7518	22.5	83.8667	22.5	87.1279	22.5	83.3834	22.5	82.842	22.5	85.6651	22.5	82.8278
	23.5	87.9493	23.5	87.1383	23.5	85.574	23.5	87.225	23.5	82.8296	23.5	83.467	23.5	85.4169	23.5	83.4504
	24.5	87.8491	24.5	87.5838	24.5	84.712	24.5	86.5098	24.5	82.0721	24.5	83.1706	24.5	85.9218	24.5	83.0662
	25.5	87.2138	25.5	86.4759	25.5	84.8449	25.5	87.7967	25.5	82.9408	25.5	82.6722	25.5	85.7625	25.5	82.6782
	26.5	87.853	26.5	86.6775	26.5	85.4635	26.5	87.2347	26.5	82.3751	26.5	84.0789	26.5	85.4243	26.5	83.7718
	27.5	87.7206	27.5	86.8588	27.5	84.9716	27.5	87.2848	27.5	82.54	27.5	83.2856	27.5	86.5748	27.5	83.286
	28.5	87.5434	28.5	86.9716	28.5	84.7944	28.5	86.7678	28.5	83.0415	28.5	82.6102	28.5	85.4249	28.5	83.1406
	29.5	87.8909	29.5	86.3841	29.5	84.9921	29.5	88.1421	29.5	82.6824	29.5	83.0866	29.5	85.6797	29.5	82.309
	30.5	87.6877	30.5	87.2901	30.5	84.7772	30.5	88.2644	30.5	83.0252	30.5	83.5348	30.5	85.5502	30.5	83.0719
	31.5	87.3196	31.5	87.0438	31.5	84.5095	31.5	86.6956	31.5	83.2317	31.5	83.1212	31.5	85.9393	31.5	82.8697
	32.5	88.0466	32.5	87.3049	32.5	85.2804	32.5	87.7684	32.5	82.6281	32.5	83.1757	32.5	85.4175	32.5	83.7672
	33.5	86.8353	33.5	87.0343	33.5	84.892	33.5	87.437	33.5	82.983	33.5	83.705	33.5	85.8424	33.5	83.3109
	34.5	87.4368	34.5	86.9357	34.5	85.0276	34.5	87.9457	34.5	83.3246	34.5	83.3566	34.5	85.5176	34.5	82.8338
	35.5	87.9958	35.5	86.6463	35.5	85.1574	35.5	86.7875	35.5	84.101	35.5	82.8294	35.5	86.2056	35.5	83.633
	36.5	87.6835	36.5	86.6093	36.5	84.2565	36.5	87.8949	36.5	83.8841	36.5	83.1131	36.5	85.5482	36.5	83.0957
	37.5	87.5272	37.5	86.9319	37.5	85.5496	37.5	87.4532	37.5	82.8898	37.5	83.7787	37.5	86.2923	37.5	83.78
	38.5	87.7871	38.5	87.7409	38.5	84.7817	38.5	87.4329	38.5	82.2923	38.5	82.4856	38.5	86.5394	38.5	83.2827
	39.5	87.6699	39.5	86.4532	39.5	85.1111	39.5	87.6061	39.5	83.2978	39.5	83.8348	39.5	85.736	39.5	83.7782
	40.5	87.7378	40.5	87.6074	40.5	85.2694	40.5	87.3159	40.5	82.2402	40.5	84.0063	40.5	85.8054	40.5	83.6263
	41.5	87.2402	41.5	87.1153	41.5	85.3475	41.5	88.3925	41.5	83.3201	41.5	83.0458	41.5	85.8211	41.5	83.3585
	42.5	87.1265	42.5	87.2174	42.5	84.3285	42.5	87.941	42.5	82.9365	42.5	83.1921	42.5	85.8887	42.5	82.4783
	43.5	88.1588	43.5	87.0074	43.5	85.0065	43.5	88.3447	43.5	82.719	43.5	83.6685	43.5	85.5615	43.5	82.6439
	44.5	87.3339	44.5	87.4444	44.5	85.1351	44.5	86.9988	44.5	83.1847	44.5	84.0858	44.5	86.3565	44.5	83.848
	45.5	87.7749	45.5	87.5861	45.5	85.6831	45.5	87.1633	45.5	82.7302	45.5	83.9724	45.5	85.4464	45.5	83.7186
	46.5	87.6599	46.5	86.9252	46.5	84.463	46.5	87.2399	46.5	83.6674	46.5	83.3502	46.5	85.5095	46.5	83.0332
	47.5	87.1177	47.5	86.796	47.5	84.908	47.5	87.7629	47.5	81.9144	47.5	83.8159	47.5	85.4612	47.5	83.2915
	48.5	86.8911	48.5	86.4294	48.5	84.6675	48.5	86.9338	48.5	83.2513	48.5	82.4138	48.5	85.464	48.5	83.2174
	49.5	87.8969	49.5	86.604	49.5	84.5085	49.5	88.0418	49.5	83.0821	49.5	83.1418	49.5	85.3556	49.5	83.0472
	50.5	87.331	50.5	86.7656	50.5	85.2498	50.5	87.167	50.5	82.5786	50.5	83.0563	50.5	84.9581	50.5	83.4503
	51.5	86.7994	51.5	86.9732	51.5	84.9333	51.5	86.5568	51.5	82.4614	51.5	82.4912	51.5	85.6564	51.5	83.9844
	52.5	87.6674	52.5	86.7073	52.5	84.8392	52.5	87.0099	52.5	82.5983	52.5	82.8478	52.5	85.4655	52.5	83.0164
	53.5	87.0757	53.5	86.5803	53.5	85.2095	53.5	87.5064	53.5	83.6912	53.5	83.5753	53.5	85.6446	53.5	83.1489
	54.5	86.4385	54.5	86.6208	54.5	84.3535	54.5	88.2703	54.5	82.1067	54.5	83.0853	54.5	85.9519	54.5	83.6469
	55.5	86.7737	55.5	86.7521	55.5	85.4497	55.5	88.0745	55.5	83.5491	55.5	83.867	55.5	86.267	55.5	83.3533
	56.5	87.111	56.5	86.4898	56.5	84.873	56.5	87.9797	56.5	83.5342	56.5	83.0151	56.5	86.015	56.5	82.8845
	57.5	87.9654	57.5	86.6031	57.5	84.8887	57.5	87.7294	57.5	82.9547	57.5	82.7367	57.5	85.8745	57.5	83.855
	58.5	87.5966	58.5	86.8493	58.5	84.5746	58.5	88.4516	58.5	83.0324	58.5	82.9333	58.5	85.6002	58.5	83.5863
	59.5	87.7533	59.5	87.2643	59.5	85.5912	59.5	88.0411	59.5	82.8133	59.5	83.5391	59.5	85.3533	59.5	82.8147
	60.5	86.993	60.5	86.9169	60.5	84.9905	60.5	86.9199	60.5	82.1033	60.5	83.568	60.5	85.3357	60.5	83.329
	61.5	87.5697	61.5	87.5857	61.5	84.618	61.5	86.8451	61.5	83.5285	61.5	83.4613	61.5	85.9709	61.5	83.1321
	62.5	87.7636	62.5	86.9977	62.5	85.1155	62.5	88.0405	62.5	83.4228	62.5	83.6772	62.5	85.8999	62.5	83.8848
	63.5	87.2068	63.5	86.8678	63.5	84.7203	63.5	87.2237	63.5	83.0461	63.5	82.9033	63.5	86.0335	63.5	84.065
	64.5	87.7174	64.5	86.5002	64.5	84.7904	64.5	88.6145	64.5	83.8566	64.5	82.9855	64.5	85.2327	64.5	82.8935
	65.5	87.7649	65.5	87.6147	65.5	85.1704	65.5	87.9434	65.5	82.0654	65.5	83.8428	65.5	85.393	65.5	83.5532
	66.5	87.4855	66.5	86.1354	66.5	85.126	66.5	86.8052	66.5	83.1743	66.5	83.2742	66.5	85.4402	66.5	83.6006
	67.5	87.8619	67.5	86.8377	67.5	85.1013	67.5	87.6836	67.5	83.5392	67.5	83.0184	67.5	85.9361	67.5	82.7973
	68.5	86.761	68.5	87.4879	68.5	84.6347	68.5	87.4915	68.5	83.1961	68.5	82.9684	68.5	84.9601	68.5	83.1433
	69.5	87.5572	69.5	86.1241	69.5	86.3085	69.5	87.4062	69.5	83.0411	69.5	83.2685	69.5	85.5455	69.5	83.4012
	70.5	86.9082	70.5	86.8783	70.5	84.7074	70.5	87.4817	70.5	83.3964	70.5	83.162	70.5	85.9035	70.5	83.2423
	71.5	87.1838	71.5	87.0282	71.5	84.2166	71.5	87.988	71.5	83.412	71.5	83.1532	71.5	85.8651	71.5	83.3878
	72.5	86.4094	72.5	87.2304	72.5	84.4983	72.5	86.3736	72.5	83.9359	72.5	83.2041	72.5	84.8382	72.5	82.7462
	73.5	88.0835	73.5	85.2379	73.5	85.0368	73.5	87.9069	73.5	82.8096	73.5	82.932	73.5	85.1057	73.5	83.2414
	74.5	88.1375	74.5	86.5732	74.5	84.83	74.5	87.8458	74.5	83.1051	74.5	83.1912	74.5	85.9067	74.5	83.2563
	75.5	88.4877	75.5	86.3833	75.5	85.2676	75.5	86.7794	75.5	83.6477	75.5	83.1977	75.5	85.8062	75.5	81.8562
	76.5	87.0572	76.5	85.8559	76.5	85.617	76.5	87.9431	76.5	82.6564	76.5	83.2048	76.5	85.4164	76.5	83.1536
	77.5	87.9338	77.5	86.9402	77.5	84.4767	77.5	88.2695	77.5	83.7229	77.5	83.0978	77.5	85.6861	77.5	83.3954
	78.5	88.186	78.5	86.237	78.5	85.1309	78.5	87.2324	78.5	83.0631	78.5	83.3775	78.5	85.2667	78.5	82.7446
	79.5	87.2871	79.5	87.1132	79.5	84.8192	79.5	88.1062	79.5	84.0663	79.5	83.1102	79.5	86.275	79.5	83.3644
	80.5	87.8726	80.5	86.2396	80.5	84.572	80.5	87.48	80.5	83.077	80.5	82.0968	80.5	85.8638	80.5	82.6671
	81.5	87.5494	81.5	86.5483	81.5	85.073	81.5	88.1773	81.5	83.421	81.5	83.1351	81.5	86.1985	81.5	83.6645
	82.5	87.421	82.5	87.0119	82.5	84.6141	82.5	87.4066	82.5	82.3717	82.5	83.1573	82.5	86.0685	82.5	82.7379
	83.5	87.4234	83.5	85.8993	83.5	85.0637	83.5	87.581	83.5	83.9287	83.5	83.2759	83.5	84.9671	83.5	83.384
	84.5	87.8398	84.5	86.0785	84.5	84.6165	84.5	88.2076	84.5	83.0491	84.5	82.8911	84.5	85.2128	84.5	83.1596
	85.5	87.7951	85.5	87.088	85.5	84.2934	85.5	87.2494	85.5	82.2989	85.5	83.6443	85.5	84.9687	85.5	82.8664
	86.5	86.9232	86.5	86.6929	86.5	84.595	86.5	87.8166	86.5	83.4401	86.5	83.1075	86.5	85.4996	86.5	83.9702
	87.5	86.8175	87.5	85.7317	87.5	84.0629	87.5	88.8808	87.5	83.8125	87.5	83.1152	87.5	86.1741	87.5	82.6614
	88.5	88.0961	88.5	86.4936	88.5	85.094	88.5	85.9665	88.5	84.1616	88.5	83.1146	88.5	84.5131	88.5	82.9557
	89.5	87.5106	89.5	86.2835	89.5	84.7616	89.5	87.0641	89.5	83.3758	89.5	83.1205	89.5	85.421	89.5	83.9822
	90.5	88.0991	90.5	86.0989	90.5	85.3833	90.5	87.3893	90.5	82.9022	90.5	82.6438	90.5	86.7256	90.5	83.9205
	91.5	88.4489	91.5	86.2986	91.5	85.0246	91.5	87.7232	91.5	82.3223	91.5	83.4802	91.5	84.4282	91.5	82.5069
	92.5	87.0125	92.5	86.9934	92.5	85.0641	92.5	87.8895	92.5	83.3457	92.5	82.7636	92.5	85.8586	92.5	83.4528
	93.5	87.8556	93.5	87.1997	93.5	85.6455	93.5	87.5565	93.5	83.8993	93.5	83.8043	93.5	85.7697	93.5	84.403
	94.5	87.786	94.5	85.7703	94.5	84.8693	94.5	86.6727	94.5	84.2679	94.5	83.239	94.5	85.4087	94.5	83.7345
	95.5	87.7639	95.5	86.6106	95.5	84.2934	95.5	88.3376	95.5	83.7827	95.5	83.528	95.5	85.2852	95.5	83.3201
	96.5	87.6417	96.5	86.717	96.5	84.272	96.5	87.0271	96.5	83.2456	96.5	83.9657	96.5	85.7679	96.5	83.6732
	97.5	87.9262	97.5	87.0443	97.5	84.5644	97.5	87.5101	97.5	82.3028	97.5	83.7122	97.5	85.5878	97.5	83.2529
	98.5	87.1745	98.5	86.3951	98.5	84.7178	98.5	87.7584	98.5	83.355	98.5	83.6923	98.5	85.9477	98.5	83.0029
	99.5	86.8439	99.5	86.5608	99.5	84.2288	99.5	87.281	99.5	82.3954	99.5	83.492	99.5	86.4419	99.5	82.7343
	100.5	86.5502	100.5	87.1693	100.5	84.5721	100.5	86.8867	100.5	83.7477	100.5	82.4666	100.5	84.8628	100.5	83.8097
	101.5	85.9013	101.5	86.9474	101.5	85.7352	101.5	86.4657	101.5	82.5083	101.5	82.7297	101.5	86.868	101.5	83.4489
	102.5	87.0644	102.5	86.2637	102.5	85.782	102.5	87.3228	102.5	83.9883	102.5	82.9947	102.5	86.2177	102.5	83.1916
	103.5	88.2335	103.5	86.5355	103.5	84.5838	103.5	86.9999	103.5	83.7205	103.5	82.9028	103.5	86.0446	103.5	82.2508
	104.5	88.1813	104.5	86.7622	104.5	84.7731	104.5	87.3874	104.5	83.2418	104.5	82.369	104.5	85.0553	104.5	82.5616
	105.5	87.5963	105.5	86.2972	105.5	85.1021	105.5	86.5834	105.5	83.2303	105.5	82.9966	105.5	85.3654	105.5	83.2224
	106.5	88.1574	106.5	86.6583	106.5	85.0238	106.5	87.5091	106.5	83.5102	106.5	84.1626	106.5	85.4198	106.5	83.2406
	107.5	87.879	107.5	86.499	107.5	84.398	107.5	87.7287	107.5	83.7989	107.5	83.371	107.5	85.7433	107.5	83.5111
	108.5	87.5487	108.5	87.4063	108.5	85.4119	108.5	87.9798	108.5	82.0603	108.5	83.0729	108.5	85.4291	108.5	82.5847
	109.5	88.1872	109.5	86.415	109.5	86.3308	109.5	87.8498	109.5	84.2762	109.5	83.9412	109.5	84.9883	109.5	83.3554
	110.5	87.5863	110.5	87.4052	110.5	84.9169	110.5	87.8745	110.5	83.2864	110.5	83.1241	110.5	85.9509	110.5	83.6895
	111.5	87.1752	111.5	87.2516	111.5	85.3979	111.5	87.8116	111.5	82.73	111.5	83.3936	111.5	85.9557	111.5	83.578
	112.5	87.3876	112.5	86.6918	112.5	85.6084	112.5	86.9178	112.5	83.3256	112.5	82.4695	112.5	86.2063	112.5	83.1885
	113.5	86.5287	113.5	87.1968	113.5	84.1771	113.5	87.1821	113.5	82.9707	113.5	83.644	113.5	86.3603	113.5	83.7313
	114.5	86.6223	114.5	86.6687	114.5	84.9932	114.5	86.8754	114.5	83.3027	114.5	83.1401	114.5	86.4425	114.5	82.6199
	115.5	87.7614	115.5	87.1023	115.5	84.6274	115.5	87.5487	115.5	83.1979	115.5	82.8486	115.5	85.8402	115.5	82.5244
	116.5	86.6106	116.5	87.8564	116.5	84.8952	116.5	87.594	116.5	83.3936	116.5	84.4656	116.5	85.6421	116.5	83.7071
	117.5	87.0353	117.5	86.97	117.5	85.1867	117.5	86.8786	117.5	83.3681	117.5	82.8843	117.5	85.7155	117.5	83.4329
	118.5	87.0523	118.5	87.6587	118.5	85.3156	118.5	88.3393	118.5	83.6138	118.5	84.7521	118.5	84.9587	118.5	83.2404
	119.5	87.1303	119.5	86.5755	119.5	84.8018	119.5	88.2899	119.5	81.88	119.5	83.4381	119.5	86.8409	119.5	83.2193
	120.5	87.8212	120.5	86.5389	120.5	85.2281	120.5	87.722	120.5	83.5134	120.5	83.2364	120.5	85.4722	120.5	82.567
	121.5	88.1021	121.5	86.4685	121.5	84.9554	121.5	86.3456	121.5	83.2569	121.5	84.136	121.5	84.9869	121.5	82.728
	122.5	87.956	122.5	86.6245	122.5	84.2028	122.5	87.3823	122.5	83.1439	122.5	84.3279	122.5	85.4622	122.5	83.3042
	123.5	87.5692	123.5	87.0046	123.5	84.908	123.5	86.1795	123.5	82.9118	123.5	84.1362	123.5	86.5353	123.5	83.2859
	124.5	86.5674	124.5	87.0245	124.5	84.8634	124.5	88.0659	124.5	83.3774	124.5	83.7975	124.5	85.9782	124.5	82.9757
	125.5	86.6303	125.5	86.3475	125.5	85.5187	125.5	87.9247	125.5	82.5101	125.5	83.6242	125.5	85.3258	125.5	83.4111
	126.5	86.6317	126.5	86.1724	126.5	84.7641	126.5	87.2265	126.5	83.2184	126.5	83.2349	126.5	85.8231	126.5	83.4497
	127.5	87.1443	127.5	87.2954	127.5	84.1652	127.5	87.3676	127.5	82.3105	127.5	84.6582	127.5	86.1492	127.5	83.2593
	128.5	87.6521	128.5	86.6175	128.5	85.2078	128.5	86.9092	128.5	83.0076	128.5	84.2915	128.5	84.928	128.5	82.9457
	129.5	87.9116	129.5	86.8506	129.5	84.9388	129.5	87.8781	129.5	83.5155	129.5	83.1426	129.5	85.9873	129.5	82.9283
	130.5	87.633	130.5	87.5094	130.5	85.0802	130.5	88.0922	130.5	82.7415	130.5	84.4591	130.5	85.6405	130.5	82.6593
	131.5	87.4209	131.5	87.4331	131.5	83.6494	131.5	88.2386	131.5	83.0342	131.5	84.0488	131.5	86.8129	131.5	83.0402
	132.5	87.4409	132.5	87.607	132.5	84.7723	132.5	87.6657	132.5	82.683	132.5	84.0866	132.5	87.0555	132.5	82.4492
	133.5	87.696	133.5	87.7048	133.5	84.664	133.5	86.9124	133.5	83.6923	133.5	84.8319	133.5	85.8511	133.5	82.95
	134.5	86.6887	134.5	86.3956	134.5	84.2016	134.5	86.5375	134.5	83.3689	134.5	83.3774	134.5	85.6308	134.5	83.7373
	135.5	87.761	135.5	86.1209	135.5	85.9768	135.5	87.6647	135.5	82.178	135.5	82.8859	135.5	85.8489	135.5	82.4123
	136.5	87.3226	136.5	87.1622	136.5	84.1721	136.5	87.9628	136.5	82.776	136.5	83.1195	136.5	85.7777	136.5	83.6396
	137.5	87.5803	137.5	86.7442	137.5	84.6509	137.5	87.4519	137.5	83.1914	137.5	84.2807	137.5	86.1448	137.5	82.766
	138.5	87.9057	138.5	87.1545	138.5	85.8989	138.5	87.2463	138.5	83.1728	138.5	84.1885	138.5	85.8426	138.5	83.3961
	139.5	87.6775	139.5	86.8763	139.5	85.3341	139.5	86.4909	139.5	82.9426	139.5	83.7852	139.5	86.2145	139.5	82.8151
	140.5	87.9108	140.5	87.0624	140.5	84.0383	140.5	87.1689	140.5	82.7411	140.5	83.4266	140.5	85.2682	140.5	82.6735
	141.5	87.115	141.5	87.2265	141.5	84.96	141.5	87.2908	141.5	82.9716	141.5	84.2824	141.5	85.7522	141.5	82.6449
	142.5	87.2259	142.5	86.276	142.5	84.388	142.5	87.4998	142.5	82.3992	142.5	84.249	142.5	85.9563	142.5	83.7497
	143.5	88.0169	143.5	87.2216	143.5	86.3678	143.5	87.6378	143.5	82.1392	143.5	83.8214	143.5	85.6256	143.5	82.7418
	144.5	87.6985	144.5	86.6957	144.5	85.8394	144.5	88.21	144.5	83.6089	144.5	83.2065	144.5	85.7263	144.5	83.2529
	145.5	87.5114	145.5	87.1656	145.5	84.6489	145.5	88.2409	145.5	82.3116	145.5	84.8238	145.5	85.6417	145.5	82.7243
	146.5	87.4175	146.5	87.0657	146.5	85.3131	146.5	87.279	146.5	83.5164	146.5	84.3925	146.5	85.8135	146.5	82.691
	147.5	87.1711	147.5	87.3245	147.5	84.9076	147.5	87.5971	147.5	82.8362	147.5	84.558	147.5	85.2963	147.5	83.5367
	148.5	88.0611	148.5	86.1725	148.5	86.0534	148.5	87.8419	148.5	83.4064	148.5	83.569	148.5	84.6061	148.5	83.0851
	149.5	86.8183	149.5	87.0328	149.5	85.0129	149.5	87.6203	149.5	81.9959	149.5	84.0342	149.5	85.4767	149.5	83.7371
	150.5	86.7469	150.5	86.2562	150.5	84.4802	150.5	88.2052	150.5	82.7947	150.5	84.2756	150.5	86.1711	150.5	83.2168
	151.5	87.6821	151.5	86.0821	151.5	84.8806	151.5	87.3395	151.5	83.8694	151.5	83.8443	151.5	85.4039	151.5	82.9924
	152.5	87.7155	152.5	87.2491	152.5	85.0218	152.5	86.7948	152.5	82.2659	152.5	83.1664	152.5	86.22	152.5	83.0096
	153.5	87.9389	153.5	86.8666	153.5	84.3995	153.5	87.4808	153.5	82.6052	153.5	83.8794	153.5	86.2566	153.5	82.9159
	154.5	87.0897	154.5	87.3709	154.5	84.8006	154.5	88.0919	154.5	83.1255	154.5	84.1114	154.5	86.4422	154.5	83.699
	155.5	87.7153	155.5	87.9301	155.5	84.2373	155.5	88.1598	155.5	82.0593	155.5	84.7142	155.5	86.2109	155.5	83.7548
	156.5	86.9104	156.5	86.4227	156.5	84.9955	156.5	88.2357	156.5	83.237	156.5	84.2191	156.5	85.8299	156.5	82.7487
	157.5	86.713	157.5	86.4457	157.5	84.9831	157.5	88.2394	157.5	82.7977	157.5	83.8566	157.5	85.4785	157.5	82.9234
	158.5	87.841	158.5	86.4256	158.5	84.9862	158.5	88.5458	158.5	83.3333	158.5	84.6972	158.5	85.7996	158.5	83.6666
	159.5	88.2515	159.5	87.1303	159.5	85.1946	159.5	88.9149	159.5	82.5285	159.5	83.635	159.5	85.7039	159.5	83.1525
	160.5	86.8394	160.5	87.6348	160.5	84.3534	160.5	86.8424	160.5	83.0075	160.5	84.1526	160.5	86.5499	160.5	83.1887
	161.5	87.5662	161.5	86.1467	161.5	84.5386	161.5	87.5135	161.5	82.7906	161.5	84.7503	161.5	85.9669	161.5	82.824
	162.5	87.0117	162.5	87.0953	162.5	85.7757	162.5	86.8935	162.5	82.5721	162.5	84.3612	162.5	85.9217	162.5	84.0758
	163.5	86.7743	163.5	87.1675	163.5	84.797	163.5	88.4212	163.5	82.5334	163.5	83.3698	163.5	85.5428	163.5	83.823
	164.5	87.4533	164.5	86.5079	164.5	85.5127	164.5	87.0913	164.5	83.0579	164.5	84.1121	164.5	86.6566	164.5	83.128
	165.5	87.3662	165.5	87.0464	165.5	85.782	165.5	87.7231	165.5	83.1026	165.5	84.0026	165.5	85.8839	165.5	82.6288
	166.5	86.5463	166.5	87.4892	166.5	85.0423	166.5	87.2621	166.5	82.7609	166.5	83.2058	166.5	85.7005	166.5	83.981
	167.5	87.1416	167.5	86.7394	167.5	85.5296	167.5	87.7824	167.5	82.8819	167.5	83.365	167.5	86.7054	167.5	83.4664
	168.5	87.2491	168.5	86.1039	168.5	84.5124	168.5	87.6772	168.5	82.9083	168.5	83.8136	168.5	86.2622	168.5	83.8802
	169.5	87.0771	169.5	86.6248	169.5	84.863	169.5	87.9361	169.5	82.7985	169.5	83.5244	169.5	85.4219	169.5	83.122
	170.5	86.9936	170.5	86.3382	170.5	85.4823	170.5	87.4194	191.72	82.5905	170.5	83.322	170.5	85.7522	170.5	83.1708
	171.5	88.2267	171.5	87.3739	171.5	85.9974	171.5	87.8048	192.72	83.7113	171.5	83.8548	171.5	85.7871	171.5	82.4788
	172.5	87.8296	172.5	87.5238	172.5	85.3457	172.5	87.6075	193.72	83.4762	172.5	84.0853	172.5	86.0291	172.5	83.8947
	173.5	87.7541	173.5	85.8754	173.5	85.1977	173.5	88.2232	194.72	83.7744	173.5	83.538	193.59	84.61	173.5	83.7462
	174.5	87.4514	174.5	86.6657	174.5	85.3747	174.5	87.8295	195.72	84.0131	174.5	83.8219	194.59	85.6694	174.5	82.6942
	193.624	85.8423	175.5	86.7219	175.5	84.6906	175.5	86.8051	196.72	82.6007	175.5	83.3991	195.59	85.8838	175.5	82.1199
	194.624	87.2965	176.5	86.2455	176.5	85.1325	176.5	87.3618	197.72	83.0592	176.5	83.3045	196.59	86.0299	176.5	83.5279
	195.624	87.556	177.5	86.0998	177.5	85.2599	177.5	87.9837	198.72	83.4309	177.5	83.5285	197.59	85.4575	177.5	82.8259
	196.624	88.3238	178.5	87.7726	178.5	85.2952	178.5	87.4269	199.72	83.5184	178.5	83.4214	198.59	86.5056	178.5	82.2233
	197.624	87.3843	179.5	86.4648	179.5	84.8341	179.5	88.5523	200.72	83.5391	179.5	83.118	199.59	85.9608	179.5	82.7443
	198.624	87.993	180.5	86.5458	180.5	84.0493	180.5	87.965	201.72	84.0907	180.5	83.1343	200.59	87.499	180.5	82.8964
	199.624	88.7047	181.5	86.7449	181.5	85.2871	181.5	87.5976	202.72	83.2673	181.5	83.2084	201.59	86.769	181.5	82.9503
	200.624	88.496	182.5	86.9025	182.5	85.1868	182.5	88.026	203.72	83.1221	182.5	83.4572	202.59	86.9783	182.5	82.7307
	201.624	88.6317	183.5	87.1098	183.5	84.796	183.5	88.0639	204.72	83.8827	183.5	83.9265	203.59	85.9671	183.5	83.1475
	202.624	88.5659	184.5	86.6232	184.5	84.7004	184.5	87.9669	205.72	83.2487	184.5	82.635	204.59	86.4708	184.5	82.753
	203.624	88.5936	185.5	86.8957	185.5	85.1601	185.5	87.374	206.72	83.6331	185.5	83.8892	205.59	85.5715	185.5	83.3256
	204.624	88.5382	186.5	86.3711	186.5	85.1331	186.5	88.415	207.72	83.6546	186.5	82.8406	206.59	85.6944	186.5	82.6433
	205.624	88.9769	187.5	86.4281	187.5	83.5607	187.5	88.1488	208.72	83.8943	187.5	83.6311	207.59	86.2885	187.5	83.2479
	206.624	88.644	188.5	86.4692	188.5	84.6466	188.5	87.6324	209.72	83.2221	188.5	83.4575	208.59	86.6527	188.5	83.0192
	207.624	88.7301	189.5	87.2406	189.5	85.5404	189.5	86.9206	210.72	83.3464	189.5	83.5748	209.59	85.9457	189.5	83.1317
	208.624	87.8199	190.5	87.2527	190.5	84.9553	190.5	88.321	211.72	82.6404	190.5	83.3596	210.59	85.9695	190.5	82.698
	209.624	88.5965	191.5	86.5564	191.5	85.2327	191.5	87.1469	212.72	84.7743	191.5	83.9387	211.59	86.9621	191.5	83.7326
	210.624	88.9269	192.5	87.1247	192.5	85.06	192.5	87.3803	213.72	83.8867	192.5	83.2942	212.59	86.2091	192.5	83.3573
	211.624	89.1802	193.5	86.3603	193.5	84.9427	193.5	87.7647	214.72	83.0756	193.5	83.7038	213.59	85.36	193.5	83.4398
	212.624	88.399	194.5	86.185	194.5	84.8969	194.5	87.7345	215.72	83.3788	194.5	83.2353	214.59	85.7253	194.5	82.4814
	213.624	88.9832	195.5	87.1554	195.5	85.6235	216.344	87.1244	216.72	83.1006	195.5	83.4407	215.59	86.3543	195.5	83.0676
	214.624	88.9508	196.5	87.0232	196.5	85.4684	217.344	86.9667	217.72	84.3443	196.5	83.1529	216.59	85.6056	196.5	83.1314
	215.624	90.0908	197.5	87.5121	197.5	85.2806	218.344	86.5378	218.72	83.7913	197.5	82.5102	217.59	85.5993	197.5	83.4105
	216.624	89.6707	198.5	87.059	198.5	85.0405	219.344	87.6256	219.72	83.4508	198.5	83.4621	218.59	86.5747	198.5	82.6201
	217.624	89.0852	199.5	85.6339	221.169	84.4219	220.344	87.7754	220.72	83.8495	199.5	83.5136	219.59	86.4024	199.5	82.5044
	218.624	89.1212	200.5	87.2167	222.169	84.8189	221.344	86.8316	221.72	83.5417	200.5	82.7132	220.59	86.0011	200.5	82.6081
	219.624	89.6657	201.5	85.8299	223.169	85.6606	222.344	87.9764	222.72	84.0624	201.5	83.5872	221.59	86.0797	201.5	83.3427
	220.624	89.135	202.5	87.0699	224.169	86.3822	223.344	87.1941	223.72	83.373	202.5	83.1213	222.59	85.523	202.5	82.9971
	221.624	89.4918	203.5	86.2277	225.169	86.0684	224.344	87.7774	224.72	83.1266	203.5	82.2644	223.59	85.7505	203.5	83.8902
	222.624	89.9572	226.01	85.8466	226.169	86.4136	225.344	88.1977	225.72	84.5866	204.5	83.1462	224.59	85.5974	204.5	83.5402
	223.624	90.3894	227.01	85.9476	227.169	85.938	226.344	87.8639	226.72	83.4826	205.5	82.597	225.59	86.0894	205.5	83.0977
	224.624	90.18	228.01	86.3729	228.169	86.8227	227.344	86.5829	227.72	84.0291	206.5	83.0771	226.59	86.5614	206.5	82.9905
	225.624	89.8884	229.01	86.8839	229.169	86.497	228.344	87.143	228.72	82.5756	207.5	83.1282	227.59	86.4519	207.5	83.2037
	226.624	91.2332	230.01	85.9424	230.169	85.7609	229.344	87.5996	229.72	83.8859	208.5	83.7584	228.59	86.1091	208.5	83.2645
	227.624	90.7909	231.01	87.2308	231.169	86.2728	230.344	87.5798	230.72	83.9079	209.5	83.3739	229.59	86.4389	209.5	83.0521
	228.624	90.2678	232.01	85.7694	232.169	84.4232	231.344	88.2023	231.72	84.2393	210.5	84.213	230.59	86.5526	210.5	82.9975
	229.624	90.0682	233.01	86.8377	233.169	85.2522	232.344	88.5938	232.72	83.767	211.5	83.5676	231.59	86.2785	211.5	82.8554
	230.624	90.8332	234.01	86.1572	234.169	87.0705	233.344	88.5562	233.72	84.0279	212.5	83.1903	232.59	85.8006	212.5	83.4409
	231.624	91.7022	235.01	87.2418	235.169	85.606	234.344	88.3361	234.72	83.7874	213.5	83.7268	233.59	86.2859	213.5	83.2855
	232.624	90.9929	236.01	87.8337	236.169	84.5967	235.344	87.8135	235.72	84.859	214.5	84.0186	234.59	87.492	214.5	83.7831
	233.624	91.5782	237.01	86.8829	237.169	84.9732	236.344	87.8098	236.72	83.2369	215.5	83.0727	235.59	86.5932	215.5	83.4689
	234.624	90.5608	238.01	86.9205	238.169	84.9797	237.344	88.0319	237.72	83.9607	216.5	82.9291	236.59	86.4671	216.5	83.8664
	235.624	90.0646	239.01	86.4452	239.169	84.8571	238.344	88.8986	238.72	83.7772	217.5	83.359	237.59	86.8177	217.5	83.5646
	236.624	89.9518	240.01	87.7535	240.169	85.5819	239.344	88.3607	239.72	84.163	238.016	81.6202	238.59	86.3916	218.5	83.2068
	237.624	91.1161	241.01	87.3663	241.169	84.4795	240.344	87.8211	240.72	83.9773	239.016	83.2956	239.59	86.822	219.5	83.047
	238.624	91.3643	242.01	87.1316	242.169	84.7249	241.344	89.0099	241.72	83.9905	240.016	83.4563	240.59	87.6201	220.5	83.8572
	239.624	92.0544	243.01	88.605	243.169	84.8701	242.344	88.5748	242.72	84.6726	241.016	82.7168	241.59	86.2112	242.93	82.015
	240.624	91.7492	244.01	87.9438	244.169	85.6259	243.344	88.4815	243.72	84.6522	242.016	83.0316	242.59	87.6956	243.93	83.0722
	241.624	91.3027	245.01	87.4712	245.169	85.0653	244.344	89.5206	244.72	84.6742	243.016	82.8019	243.59	85.1854	244.93	83.2051
	242.624	92.324	246.01	87.9023	246.169	84.661	245.344	87.9742	245.72	84.837	244.016	82.7252	244.59	86.538	245.93	82.797
	243.624	91.0789	247.01	87.7464	247.169	85.3024	246.344	88.152	246.72	83.9925	245.016	83.4891	245.59	87.0362	246.93	83.3955
	244.624	92.2409	248.01	88.3803	248.169	85.539	247.344	89.3027	247.72	84.789	246.016	83.4447	246.59	86.3419	247.93	82.9273
	245.624	91.7812	249.01	88.1242	249.169	85.6876	248.344	88.8151	248.72	84.6496	247.016	83.4937	247.59	85.7389	248.93	82.6179
	246.624	92.3157	250.01	87.3808	250.169	86.2616	249.344	88.462	249.72	84.2086	248.016	83.0851	248.59	86.6546	249.93	83.3558
	247.624	91.0513	251.01	87.6701	251.169	85.7826	250.344	88.4908	250.72	84.3003	249.016	82.8913	249.59	85.9911	250.93	83.3947
	248.624	92.3315	252.01	87.8846	252.169	86.2668	251.344	89.9085	251.72	84.9953	250.016	83.3815	250.59	86.1287	251.93	82.4054
	249.624	92.8265	253.01	87.7502	253.169	85.6216	252.344	89.4878	252.72	85.0382	251.016	83.6568	251.59	85.9834	252.93	83.3863
	250.624	92.3718	254.01	88.3536	254.169	85.9535	253.344	88.3854	253.72	84.4653	252.016	83.4851	252.59	86.0259	253.93	82.9071
	251.624	91.5178	255.01	89.0672	255.169	86.7269	254.344	88.8783	254.72	84.1554	253.016	83.5262	253.59	87.0446	254.93	81.7931
	252.624	92.0862	256.01	88.4601	256.169	86.6795	255.344	88.8635	255.72	84.7645	254.016	82.9983	254.59	86.8158	255.93	83.0502
	253.624	92.6776	257.01	88.7695	257.169	86.9044	256.344	89.7633	256.72	84.4816	255.016	83.6233	255.59	86.8865	256.93	82.4256
	254.624	93.4912	258.01	88.8661	258.169	86.9081	257.344	89.7233	257.72	83.6688	256.016	83.5175	256.59	86.2383	257.93	82.7825
	255.624	92.8781	259.01	88.5694	259.169	87.0313	258.344	89.9934	258.72	85.1572	257.016	83.2696	257.59	86.6308	258.93	83.8119
	256.624	92.7646	260.01	89.0924	260.169	86.7761	259.344	89.6093	259.72	84.669	258.016	83.0136	258.59	86.2749	259.93	83.0598
	257.624	93.0495	261.01	88.9249	261.169	87.2205	260.344	90.2651	260.72	84.7558	259.016	84.0557	259.59	87.4029	260.93	83.808
	258.624	92.2437	262.01	88.0528	262.169	86.846	261.344	89.4585	261.72	85.1772	260.016	83.8463	260.59	86.8162	261.93	82.5746
	259.624	92.7245	263.01	88.3311	263.169	86.9507	262.344	89.8518	262.72	85.0148	261.016	84.3065	261.59	86.0723	262.93	83.1414
	260.624	93.4653	264.01	88.9974	264.169	86.528	263.344	90.4228	263.72	85.0971	262.016	83.8373	262.59	86.6554	263.93	83.1117
	261.624	93.5433	265.01	88.6112	265.169	87.3173	264.344	89.996	264.72	85.0605	263.016	84.5105	263.59	86.4866	264.93	81.5154
	262.624	94.1307	266.01	88.8759	266.169	87.218	265.344	89.3345	265.72	85.6816	264.016	84.1421	264.59	86.9724	265.93	82.4983
	263.624	93.3413	267.01	89.2258	267.169	87.0272	266.344	89.508	266.72	85.1321	265.016	83.9408	265.59	87.0958	266.93	82.7609
	264.624	93.5698	268.01	89.1268	268.169	87.1762	267.344	90.3951	267.72	84.5594	266.016	84.3544	266.59	87.7195	267.93	82.8552
	265.624	93.2267	269.01	89.9609	269.169	87.059	268.344	88.5635	268.72	85.6054	267.016	84.0331	267.59	86.9606	268.93	83.6114
	266.624	93.2941	270.01	91.1225	270.169	87.2541	269.344	89.7913	269.72	84.6396	268.016	83.9705	268.59	86.2751	269.93	84.1277
	267.624	94.1637	271.01	89.4529	271.169	87.6071	270.344	89.4642	270.72	85.7921	269.016	84.4847	269.59	87.1062	270.93	82.6347
	268.624	95.5232	272.01	90.8573	272.169	87.6168	271.344	90.3944	271.72	85.0764	270.016	83.5731	270.59	86.9998	271.93	83.0636
	269.624	94.077	273.01	90.0344	273.169	88.0246	272.344	90.298	272.72	84.8348	271.016	83.7125	271.59	86.007	272.93	82.9331
	270.624	95.0016	274.01	89.4839	274.169	88.3425	273.344	90.3083	273.72	85.0181	272.016	84.147	272.59	86.3783	273.93	82.7324
	271.624	94.5245	275.01	90.6393	275.169	87.126	274.344	90.6004	274.72	85.6631	273.016	83.3829	273.59	86.7995	274.93	83.9654
	272.624	95.0028	276.01	90.1903	276.169	87.3563	275.344	89.8437	275.72	84.9464	274.016	83.3867	274.59	87.5938	275.93	83.1357
	273.624	94.7222	277.01	89.9964	277.169	87.8295	276.344	90.5636	276.72	85.7911	275.016	84.4554	275.59	86.7222	276.93	83.188
	274.624	95.2951	278.01	89.6233	278.169	87.8799	277.344	91.1765	277.72	85.5529	276.016	84.2254	276.59	87.0403	277.93	83.4221
	275.624	94.5124	279.01	90.4803	279.169	87.8894	278.344	90.7422	278.72	85.3215	277.016	83.6457	277.59	86.8901	278.93	82.2861
	276.624	95.0618	280.01	89.2586	280.169	88.0632	279.344	91.4262	279.72	85.8146	278.016	83.8803	278.59	86.8275	279.93	82.9101
	277.624	95.2161	281.01	90.4012	281.169	87.6016	280.344	90.1737	280.72	85.8176	279.016	84.365	279.59	86.5619	280.93	83.654
	278.624	95.4196	282.01	91.0348	282.169	87.8778	281.344	89.7231	281.72	85.7477	280.016	84.5263	280.59	87.7125	281.93	82.4924
	279.624	95.1388	283.01	90.8757	283.169	87.9823	282.344	90.4787	282.72	85.8464	281.016	84.1713	281.59	87.0623	282.93	83.2175
	280.624	95.3513	284.01	91.1982	284.169	89.6649	283.344	91.3635	283.72	86.3927	282.016	84.4759	282.59	86.9691	283.93	83.5853
	281.624	95.7656	285.01	90.9805	285.169	89.0315	284.344	91.3261	284.72	85.3779	283.016	83.2066	283.59	87.5697	284.93	82.9336
	282.624	95.1056	286.01	90.2179	286.169	87.6028	285.344	90.9967	285.72	85.7474	284.016	84.6069	284.59	87.1182	285.93	82.9073
	283.624	95.9579	287.01	90.7532	287.169	89.1233	286.344	90.817	286.72	85.321	285.016	84.0606	285.59	86.989	286.93	81.5882
	284.624	96.6021	288.01	91.2883	288.169	88.678	287.344	90.6862	287.72	85.9016	286.016	83.9648	286.59	87.2185	287.93	83.1487
	285.624	95.2093	289.01	91.143	289.169	90.058	288.344	90.8563	288.72	85.3259	287.016	84.5396	287.59	88.4869	288.93	82.6544
	286.624	95.0361	290.01	91.5856	290.169	88.1284	289.344	90.665	289.72	85.085	288.016	84.6461	288.59	87.7619	289.93	83.3125
	287.624	95.3513	291.01	91.036	291.169	88.8275	290.344	90.059	290.72	85.6823	289.016	84.8784	289.59	87.0291	290.93	83.7126
	288.624	95.4703	292.01	90.7075	292.169	88.8322	291.344	92.1777	291.72	85.4251	290.016	83.4004	290.59	86.6808	291.93	83.5536
	289.624	94.9089	293.01	92.2943	293.169	89.2392	292.344	90.6678	292.72	85.9345	291.016	84.1841	291.59	87.0363	292.93	82.8872
	290.624	96.1596	294.01	91.8783	294.169	89.5465	293.344	91.9471	293.72	86.4217	292.016	84.3652	292.59	86.8451	293.93	83.7872
	291.624	96.5221	295.01	91.9428	295.169	88.8112	294.344	90.8162	294.72	85.926	293.016	85.2446	293.59	88.1649	294.93	82.5877
	292.624	96.654	296.01	91.9422	296.169	89.0619	295.344	92.4089	295.72	86.2495	294.016	85.3051	294.59	87.3386	295.93	82.8223
	293.624	96.9917	297.01	91.4991	297.169	90.0838	296.344	92.3807	296.72	86.5135	295.016	83.482	295.59	87.4945	296.93	83.0952
	294.624	96.4064	298.01	91.5075	298.169	90.1816	297.344	92.5122	297.72	85.5608	296.016	84.7666	296.59	87.2639	297.93	82.1831
	295.624	96.8238	299.01	91.1308	299.169	87.8377	298.344	91.0814	298.72	85.7582	297.016	84.1689	297.59	86.9763	298.93	82.6552
	296.624	96.3381	300.01	91.6033	300.169	90.0128	299.344	92.4197	299.72	86.3924	298.016	84.8799	298.59	85.8056	299.93	83.3933
	297.624	96.8394	301.01	92.1123	301.169	89.5265	300.344	91.0891	300.72	86.2795	299.016	84.7881	299.59	86.7847	300.93	83.2066
	298.624	97.5194	302.01	92.0912	302.169	89.773	301.344	92.2996	301.72	86.6055	300.016	83.8316	300.59	86.938	301.93	83.0732
	299.624	97.1001	303.01	92.4161	303.169	90.4257	302.344	91.7184	302.72	86.1056	301.016	84.7946	301.59	88.2971	302.93	82.9297
	300.624	97.3753	304.01	92.1529	304.169	91.2885	303.344	93.094	303.72	86.0136	302.016	84.4885	302.59	87.5008	303.93	82.5265
	301.624	97.2815	305.01	92.6463	305.169	90.1608	304.344	91.66	304.72	86.4944	303.016	85.1553	303.59	87.5383	304.93	82.8316
	302.624	97.6916	306.01	92.1098	306.169	90.0903	305.344	92.7567	305.72	86.509	304.016	85.0228	304.59	86.9796	305.93	83.0964
	303.624	98.2784	307.01	92.731	307.169	90.3502	306.344	91.3708	306.72	85.2072	305.016	83.5367	305.59	87.512	306.93	82.9234
	304.624	97.6011	308.01	92.7625	308.169	89.4629	307.344	92.0645	307.72	86.2295	306.016	85.1892	306.59	88.3214	307.93	83.4388
	305.624	96.5685	309.01	92.2527	309.169	88.9395	308.344	92.1535	308.72	86.9481	307.016	84.8865	307.59	86.7016	308.93	82.9918
	306.624	96.1613	310.01	92.858	310.169	91.1897	309.344	93.3501	309.72	87.078	308.016	84.9083	308.59	88.0227	309.93	83.0734
	307.624	97.3341	311.01	92.4749	311.169	91.004	310.344	92.5067	310.72	87.1965	309.016	85.0899	309.59	87.2258	310.93	83.0394
	308.624	97.8397	312.01	92.2862	312.169	89.3902	311.344	92.2222	311.72	87.8451	310.016	85.3845	310.59	88.5516	311.93	83.126
	309.624	97.5947	313.01	92.7902	313.169	90.6106	312.344	92.225	312.72	86.0607	311.016	84.3166	311.59	87.3074	312.93	82.169
	310.624	97.8597	314.01	92.8549	314.169	90.0886	313.344	93.3471	313.72	87.094	312.016	84.5277	312.59	87.0215	313.93	83.0146
	311.624	97.605	315.01	93.7233	315.169	90.946	314.344	92.7448	314.72	87.0062	313.016	84.9316	313.59	86.8973	314.93	83.0947
	312.624	97.9711	316.01	93.7099	316.169	91.2705	315.344	92.7113	315.72	86.4979	314.016	84.6739	314.59	87.9353	315.93	83.4219
	313.624	97.511	317.01	93.7594	317.169	90.9163	316.344	92.753	316.72	86.6308	315.016	85.7091	315.59	87.211	316.93	82.9518
	314.624	97.9466	318.01	92.7415	318.169	91.5416	317.344	93.1544	317.72	87.3881	316.016	85.3983	316.59	88.253	317.93	83.0078
	315.624	97.5518	319.01	93.3582	319.169	90.7976	318.344	92.3377	318.72	86.576	317.016	85.08	317.59	87.2876	318.93	83.027
	316.624	98.3846	320.01	94.6966	320.169	90.7564	319.344	93.5134	319.72	86.4143	318.016	84.1245	318.59	87.5639	319.93	83.4907
	317.624	97.9159	321.01	92.882	321.169	92.2998	320.344	92.7632	320.72	86.7764	319.016	84.5708	319.59	87.5877	320.93	84.6782
	318.624	98.1395	322.01	93.7484	322.169	92.194	321.344	91.8078	321.72	86.6682	320.016	84.4701	320.59	87.4098	321.93	82.8744
	319.624	98.1403	323.01	93.2961	323.169	91.373	322.344	92.8319	322.72	87.9896	321.016	85.4702	321.59	88.5757	322.93	82.1947
	320.624	99.1677	324.01	94.1153	324.169	91.4523	323.344	94.6096	323.72	86.9109	322.016	86.5801	322.59	87.7062	323.93	83.0674
	321.624	97.8497	325.01	93.5783	325.169	91.7447	324.344	93.2918	324.72	87.3645	323.016	86.015	323.59	88.3728	324.93	82.7897
	322.624	98.3329	326.01	93.4979	326.169	92.1244	325.344	92.9434	325.72	86.6385	324.016	85.6424	324.59	86.8426	325.93	82.9839
	323.624	98.4961	327.01	93.3965	327.169	90.6813	326.344	93.076	326.72	87.8591	325.016	85.1484	325.59	87.1183	326.93	82.0381
	324.624	98.6257	328.01	92.4857	328.169	91.7212	327.344	93.0268	327.72	86.941	326.016	85.9957	326.59	87.1429	327.93	83.1663
	325.624	98.6016	329.01	94.2557	329.169	91.6705	328.344	92.9624	328.72	88.1573	327.016	85.5999	327.59	87.1556	328.93	83.2373
	326.624	99.7895	330.01	93.9521	330.169	92.5146	329.344	93.5989	329.72	86.788	328.016	84.2976	328.59	87.162	329.93	83.1465
	327.624	99.2285	331.01	93.9734	331.169	92.2017	330.344	94.1102	330.72	86.6855	329.016	84.7866	329.59	88.2838	330.93	83.1763
	328.624	98.8869	332.01	94.3605	332.169	91.7831	331.344	93.0064	331.72	87.6502	330.016	84.2498	330.59	86.7812	331.93	82.3398
	329.624	98.9676	333.01	94.5223	333.169	91.2787	332.344	94.3786	332.72	87.4949	331.016	85.7787	331.59	87.3046	332.93	82.5985
	330.624	98.449	334.01	94.88	334.169	91.7665	333.344	93.2183	333.72	87.6954	332.016	85.3507	332.59	87.3074	333.93	83.6366
	331.624	99.6981	335.01	94.8018	335.169	91.9662	334.344	93.8392	334.72	87.9772	333.016	85.6684	333.59	87.1724	334.93	83.4878
	332.624	99.2114	336.01	94.3616	336.169	91.7456	335.344	94.564	335.72	87.6913	334.016	84.9195	334.59	88.7981	335.93	83.496
	333.624	99.271	337.01	95.4775	337.169	93.1612	336.344	94.1585	336.72	86.842	335.016	86.0212	335.59	87.2662	336.93	81.9557
	334.624	98.2757	338.01	95.3212	338.169	92.0183	337.344	94.9754	337.72	87.1366	336.016	87.0494	336.59	88.0163	337.93	83.7068
	335.624	98.9438	339.01	95.0562	339.169	92.5464	338.344	93.1016	338.72	87.7946	337.016	85.4735	337.59	87.3913	338.93	81.9101
	336.624	99.9026	340.01	95.6185	340.169	92.5114	339.344	94.8022	339.72	87.5272	338.016	86.0263	338.59	87.6553	339.93	82.2326
	337.624	100.005	341.01	95.2344	341.169	92.9052	340.344	93.0493	340.72	88.0925	339.016	85.1464	339.59	87.0533	340.93	83.2723
	338.624	99.3893	342.01	94.4584	342.169	93.1802	341.344	94.2548	341.72	87.8748	340.016	84.9222	340.59	87.2532	341.93	83.5824
	339.624	99.595	343.01	95.909	343.169	92.7864	342.344	93.9929	342.72	87.3332	341.016	86.2692	341.59	87.9791	342.93	82.7387
	340.624	99.5678	344.01	94.445	344.169	93.0468	343.344	94.1932	343.72	88.8582	342.016	85.8101	342.59	87.1965	343.93	82.4531
	341.624	100.582	345.01	95.9665	345.169	93.7035	344.344	93.693	344.72	88.6173	343.016	85.9922	343.59	86.8575	344.93	83.4843
	342.624	100.447	346.01	96.937	346.169	93.8696	345.344	94.7355	345.72	87.8608	344.016	86.0055	344.59	86.371	345.93	83.6697
	343.624	100.675	347.01	96.6842	347.169	92.6083	346.344	94.7938	346.72	87.9669	345.016	86.8186	345.59	87.7799	346.93	83.4076
	344.624	101.204	348.01	95.9046	348.169	92.5327	347.344	94.9102	347.72	87.6269	346.016	85.6685	346.59	87.1651	347.93	83.2271
	345.624	100.394	349.01	95.9452	349.169	94.1721	348.344	94.4086	348.72	87.7555	347.016	86.4817	347.59	87.7029	348.93	83.8044
	346.624	100.717	350.01	95.7304	350.169	94.7458	349.344	94.6647	349.72	87.9773	348.016	85.817	348.59	88.0961	349.93	83.2745
	347.624	100.266	351.01	95.6747	351.169	93.2682	350.344	95.3418	350.72	88.1178	349.016	85.5234	349.59	88.6265	350.93	82.4489
	348.624	100.265	352.01	96.1944	352.169	93.4472	351.344	95.138	351.72	87.3118	350.016	86.3128	350.59	87.9885	351.93	83.5435
	349.624	100.598	353.01	96.465	353.169	93.4625	352.344	95.9612	352.72	87.8749	351.016	86.2888	351.59	87.533	352.93	82.7688
	350.624	101.238	354.01	95.7939	354.169	93.3225	353.344	94.213	353.72	87.9869	352.016	86.7461	352.59	87.6533	353.93	83.4611
	351.624	100.589	355.01	95.19	355.169	94.5341	354.344	94.9279	354.72	88.1517	353.016	85.5375	353.59	87.7721	354.93	83.7431
	352.624	100.787	356.01	96.6297	356.169	94.0058	355.344	94.6433	355.72	88.5883	354.016	86.3336	354.59	88.0525	355.93	83.2757
	353.624	100.649	357.01	96.6774	357.169	94.6559	356.344	93.9626	356.72	88.4902	355.016	86.7999	355.59	88.3192	356.93	82.49
	354.624	101.05	358.01	96.2119	358.169	94.7537	357.344	94.729	357.72	87.8225	356.016	86.1015	356.59	87.7676	357.93	83.8585
	355.624	101.755	359.01	97.4021	359.169	94.3709	358.344	94.7838	358.72	88.6701	357.016	86.7551	357.59	87.8794	358.93	83.5145
	356.624	100.455	360.01	97.163	360.169	93.5993	359.344	95.4914	359.72	88.7477	358.016	86.3056	358.59	86.7348	359.93	84.488
	357.624	101.245	361.01	96.8582	361.169	94.3324	360.344	95.0094	360.72	88.191	359.016	86.0977	359.59	88.2503	360.93	83.585
	358.624	101.385	362.01	95.8454	362.169	94.6125	361.344	94.642	361.72	89.1022	360.016	86.3161	360.59	87.7351	361.93	83.1028
	359.624	101.365	363.01	94.871	363.169	93.6403	362.344	95.1313	362.72	88.8621	361.016	86.2817	361.59	88.0496	362.93	82.4503
	360.624	102.189	364.01	96.6448	364.169	94.1365	363.344	95.2586	363.72	88.8355	362.016	85.989	362.59	87.6407	363.93	83.1774
	361.624	101.407	365.01	96.8151	365.169	94.651	364.344	95.5939	364.72	88.2162	363.016	86.5784	363.59	88.0506	364.93	83.7572
	362.624	102.465	366.01	97.8304	366.169	94.3726	365.344	95.9844	365.72	89.0994	364.016	85.8929	364.59	87.168	365.93	84.5287
	363.624	102.574	367.01	96.9901	367.169	94.8791	366.344	95.6738	366.72	88.9456	365.016	87.4925	365.59	87.5842	366.93	83.6131
	364.624	102.502	368.01	97.372	368.169	94.751	367.344	95.6483	367.72	89.5147	366.016	86.3736	366.59	87.3216	367.93	82.9523
	365.624	101.448	369.01	97.2206	369.169	95.031	368.344	94.8481	368.72	88.8011	367.016	86.982	367.59	87.3697	368.93	83.4087
	366.624	102.519	370.01	97.0792	370.169	94.7039	369.344	95.8765	369.72	89.4876	368.016	86.9261	368.59	87.7991	369.93	83.6182
	367.624	102.356	371.01	96.9009	371.169	94.5616	370.344	96.3389	370.72	89.7414	369.016	85.6453	369.59	87.2852	370.93	82.3611
	368.624	102.053	372.01	97.1033	372.169	95.4702	371.344	96.3613	371.72	88.645	370.016	86.7443	370.59	87.9283	371.93	83.0282
	369.624	101.94	373.01	97.4686	373.169	94.9261	372.344	96.3924	372.72	89.8913	371.016	86.1432	371.59	87.6128	372.93	83.4823
	370.624	102.557	374.01	97.4812	374.169	94.4972	373.344	94.9458	373.72	88.921	372.016	87.1333	372.59	86.9512	373.93	83.0914
	371.624	102.621	375.01	97.3532	375.169	95.0297	374.344	96.1512	374.72	89.617	373.016	86.4696	373.59	87.8418	374.93	84.316
	372.624	102.676	376.01	97.5139	376.169	94.6166	375.344	96.8011	375.72	89.4283	374.016	86.9004	374.59	87.4482	375.93	83.8913
	373.624	102.804	377.01	98.5255	377.169	94.8222	376.344	96.1799	376.72	89.0672	375.016	86.3866	375.59	87.5971	376.93	82.7267
	374.624	103.227	378.01	97.5823	378.169	95.0674	377.344	96.9292	377.72	89.1124	376.016	85.973	376.59	88.3492	377.93	83.5279
	375.624	103.831	379.01	98.2835	379.169	95.3792	378.344	96.5967	378.72	89.7415	377.016	88.0654	377.59	88.3034	378.93	83.5174
	376.624	103.185	380.01	98.1943	380.169	94.9752	379.344	95.6154	379.72	89.6334	378.016	87.6168	378.59	87.4393	379.93	84.15
	377.624	102.815	381.01	98.0746	381.169	95.4992	380.344	96.9463	380.72	88.971	379.016	86.5806	379.59	87.718	380.93	82.7436
	378.624	103.091	382.01	98.3496	382.169	95.9088	381.344	96.2641	381.72	89.4982	380.016	86.7675	380.59	87.9971	381.93	82.8308
	379.624	103.997	383.01	98.8344	383.169	95.2229	382.344	95.5248	382.72	89.7397	381.016	87.1856	381.59	86.5585	382.93	83.8023
	380.624	104.176	384.01	97.6817	384.169	95.9469	383.344	97.5011	383.72	89.357	382.016	86.3396	382.59	87.2562	383.93	83.1313
	381.624	103.85	385.01	97.8626	385.169	95.9431	384.344	96.8018	384.72	90.0249	383.016	87.5225	383.59	87.1595	384.93	82.9016
	382.624	103.883	386.01	97.4397	386.169	96.0346	385.344	96.6768	385.72	89.2314	384.016	87.6119	384.59	87.8212	385.93	83.1267
	383.624	104.231	387.01	98.0445	387.169	95.4231	386.344	96.1853	386.72	88.9398	385.016	86.8791	385.59	87.598	386.93	83.7444
	384.624	104.576	388.01	98.2096	388.169	95.2813	387.344	97.2876	387.72	89.0449	386.016	86.0516	386.59	87.8769	387.93	83.8494
	385.624	104.296	389.01	98.7076	389.169	96.8957	388.344	96.4022	388.72	89.9291	387.016	86.8117	387.59	88.2272	388.93	84.06
	386.624	103.526	390.01	98.3401	390.169	96.5819	389.344	97.4458	389.72	89.3705	388.016	86.6925	388.59	87.5493	389.93	83.1585
	387.624	104.76	391.01	98.5202	391.169	95.7243	390.344	97.4586	390.72	89.7498	389.016	86.4899	389.59	88.0463	390.93	83.4249
	388.624	104.647	392.01	99.2314	392.169	95.7389	391.344	96.5917	391.72	89.1299	390.016	86.7768	390.59	88.5259	391.93	83.7228
	389.624	104.693	393.01	99.0914	393.169	95.5648	392.344	96.9597	392.72	89.5791	391.016	87.4347	391.59	88.233	392.93	83.6678
	390.624	104.099	394.01	99.0206	394.169	95.8606	393.344	98.1972	393.72	88.8418	392.016	87.2894	392.59	88.373	393.93	83.5684
	391.624	104.543	395.01	99.767	395.169	96.1183	394.344	96.8047	394.72	90.5467	393.016	87.9408	393.59	88.4927	394.93	83.4109
	392.624	104.093	396.01	99.7246	396.169	97.2045	395.344	96.6901	395.72	89.2849	394.016	87.4122	394.59	88.2172	395.93	82.7983
	393.624	105.326	397.01	99.63	397.169	97.1181	396.344	97.1902	396.72	89.2331	395.016	86.3057	395.59	86.9112	396.93	83.8185
	394.624	104.44	398.01	99.1151	398.169	96.4499	397.344	97.9574	397.72	90.3286	396.016	87.6382	396.59	87.5124	397.93	83.9436
	395.624	105.242	399.01	98.688	399.169	96.3143	398.344	97.0165	398.72	88.8484	397.016	87.2681	397.59	88.5716	398.93	83.1329
	396.624	105.634	400.01	99.5356	400.169	97.095	399.344	97.7386	399.72	89.8899	398.016	87.4859	398.59	87.8392	399.93	83.6379
	397.624	105.215	401.01	99.8467	401.169	96.5129	400.344	97.8207	400.72	89.4581	399.016	87.8065	399.59	88.8318	400.93	83.6122
	398.624	105.689	402.01	98.5354	402.169	97.0006	401.344	97.2827	401.72	90.3961	400.016	87.2338	400.59	87.7333	401.93	82.9429
	399.624	104.473	403.01	99.2473	403.169	97.4914	402.344	97.3861	402.72	89.8167	401.016	86.5691	401.59	87.8111	402.93	83.5915
	400.624	104.654	404.01	101.155	404.169	96.7423	403.344	97.5864	403.72	90.1491	402.016	87.012	402.59	87.2777	403.93	83.7963
	401.624	106.24	405.01	100.096	405.169	96.5173	404.344	97.9862	404.72	90.4855	403.016	87.9062	403.59	87.7887	404.93	82.0809
	402.624	104.959	406.01	100.206	406.169	96.5293	405.344	97.9836	405.72	90.1543	404.016	88.4222	404.59	87.4245	405.93	83.1331
	403.624	105.655	407.01	99.9825	407.169	97.4199	406.344	98.0015	406.72	90.0141	405.016	87.0452	405.59	88.582	406.93	82.6847
	404.624	104.637	408.01	99.7548	408.169	96.9859	407.344	97.374	407.72	90.2194	406.016	87.6998	406.59	88.4636	407.93	83.3098
	405.624	105.391	409.01	100.328	409.169	96.9403	408.344	98.5106	408.72	90.1782	407.016	87.0707	407.59	87.9028	408.93	83.4389
	406.624	105.708	410.01	99.6513	410.169	97.653	409.344	97.0336	409.72	89.6259	408.016	87.8189	408.59	88.4071	409.93	82.7783
	407.624	105.368	411.01	100.552	411.169	97.512	410.344	97.7742	410.72	90.0782	409.016	87.849	409.59	87.9662	410.93	82.8216
	408.624	105.614	412.01	100.247	412.169	97.7481	411.344	98.0371	411.72	90.1497	410.016	87.6282	410.59	88.2066	411.93	83.1957
	409.624	105.618	413.01	100.17	413.169	97.3704	412.344	97.5789	412.72	90.5207	411.016	87.3488	411.59	88.5531	412.93	81.6674
	410.624	105.026	414.01	99.6481	414.169	98.1519	413.344	98.3289	413.72	90.7252	412.016	88.6832	412.59	87.3106	413.93	83.2188
	411.624	106.001	415.01	100.768	415.169	97.4167	414.344	98.6954	414.72	91.4897	413.016	88.9144	413.59	87.9135	414.93	83.3904
	412.624	106.161	416.01	99.8499	416.169	97.5563	415.344	97.5099	415.72	90.7535	414.016	88.0318	414.59	88.6036	415.93	83.1918
	413.624	106.503	417.01	99.2308	417.169	98.1863	416.344	97.6304	416.72	90.2731	415.016	87.8741	415.59	88.1345	416.93	83.5442
	414.624	106.027	418.01	100.346	418.169	97.7903	417.344	98.579	417.72	90.1699	416.016	87.5782	416.59	87.8645	417.93	82.5957
	415.624	106.346	419.01	100.8	419.169	97.6063	418.344	97.9879	418.72	90.7051	417.016	88.6321	417.59	88.2167	418.93	83.0698
	416.624	106.18	420.01	101.26	420.169	97.55	419.344	98.7607	419.72	90.6972	418.016	88.2993	418.59	88.3275	419.93	81.4865
	417.624	106.111	421.01	100.564	421.169	97.8104	420.344	98.8432	420.72	90.8041	419.016	88.5696	419.59	88.0618	420.93	82.6866
	418.624	105.957	422.01	100.153	422.169	98.4063	421.344	98.393	421.72	89.7789	420.016	87.5476	420.59	88.1796	421.93	82.6832
	419.624	106.619	423.01	101.635	423.169	98.3435	422.344	98.5502	422.72	90.8287	421.016	88.5364	421.59	88.4495	422.93	82.8559
	420.624	107.258	424.01	100.633	424.169	98.8915	423.344	98.9074	423.72	90.6363	422.016	88.153	422.59	88.81	423.93	83.2517
	421.624	106.386	425.01	100.094	425.169	99.1194	424.344	98.2803	424.72	91.0935	423.016	88.3181	423.59	88.1073	424.93	83.1184
	422.624	108.28	426.01	101.12	426.169	97.8479	425.344	98.7087	425.72	90.8693	424.016	87.9952	424.59	88.0265	425.93	82.8234
	423.624	106.12	427.01	102.046	427.169	98.549	426.344	98.6132	426.72	90.3865	425.016	88.0161	425.59	88.0756	426.93	82.4755
	424.624	106.817	428.01	101.049	428.169	99.4511	427.344	98.0226	427.72	90.5125	426.016	88.2906	426.59	88.5943	427.93	83.103
	425.624	106.57	429.01	101.459	429.169	99.0988	428.344	98.3207	428.72	91.3393	427.016	88.0693	427.59	88.9996	428.93	83.3697
	426.624	107.358	430.01	102.065	430.169	100.265	429.344	99.8346	429.72	91.4816	428.016	87.7154	428.59	88.0896	429.93	82.9288
	427.624	106.71	431.01	101.082	431.169	99.6127	430.344	99.0452	430.72	91.2092	429.016	87.4347	429.59	87.9587	430.93	82.5027
	428.624	106.359	432.01	101.105	432.169	99.0582	431.344	100.041	431.72	90.9693	430.016	87.2349	430.59	87.9144	431.93	82.7877
	429.624	107.73	433.01	101.056	433.169	99.4398	432.344	99.2969	432.72	91.2169	431.016	87.3027	431.59	88.1402	432.93	83.2773
	430.624	108.69	434.01	101.476	434.169	99.7472	433.344	99.258	433.72	90.5682	432.016	88.1265	432.59	88.9079	433.93	83.0741
	431.624	107.815	435.01	101.441	435.169	98.5294	434.344	99.3145	434.72	89.6251	433.016	88.333	433.59	88.5668	434.93	82.6137
	432.624	108.26	436.01	102.561	436.169	99.4793	435.344	99.2153	435.72	91.9435	434.016	88.8386	434.59	89.5303	435.93	82.4893
	433.624	108.057	437.01	102.208	437.169	99.5423	436.344	99.3325	436.72	91.1269	435.016	88.4255	435.59	88.165	436.93	82.8242
	434.624	108.139	438.01	102.326	438.169	99.9926	437.344	99.5191	437.72	91.2608	436.016	88.8768	436.59	88.6611	437.93	82.7201
	435.624	107.848	439.01	101.166	439.169	98.4201	438.344	99.1525	438.72	89.9652	437.016	87.7271	437.59	88.7661	438.93	82.5315
	436.624	107.867	440.01	102.323	440.169	99.2464	439.344	98.9989	439.72	90.3226	438.016	87.7294	438.59	88.7256	439.93	82.591
	437.624	108.023	441.01	101.529	441.169	99.5565	440.344	99.9488	440.72	92.0961	439.016	89.1795	439.59	88.3865	440.93	83.2461
	438.624	108.486	442.01	102.867	442.169	100.276	441.344	99.0883	441.72	91.4515	440.016	88.125	440.59	88.6908	441.93	83.0161
	439.624	107.686	443.01	102.658	443.169	99.9018	442.344	99.1766	442.72	91.1703	441.016	87.9276	441.59	88.4689	442.93	82.8351
	440.624	108.184	444.01	101.786	444.169	101.008	443.344	100.241	443.72	91.1586	442.016	88.1454	442.59	88.9469	443.93	83.6757
	441.624	108.85	445.01	102.183	445.169	99.013	444.344	101.377	444.72	91.1859	443.016	88.0852	443.59	88.2076	444.93	83.258
	442.624	108.397	446.01	102.187	446.169	99.8736	445.344	99.9301	445.72	91.7393	444.016	87.8018	444.59	88.1355	445.93	83.0167
	443.624	108.484	447.01	102.891	447.169	99.1547	446.344	99.8269	446.72	91.7971	445.016	88.5484	445.59	87.8087	446.93	82.7111
	444.624	109.535	448.01	102.655	448.169	100.29	447.344	100.641	447.72	91.4078	446.016	88.5883	446.59	87.8445	447.93	82.9973
	445.624	108.626	449.01	102.836	449.169	100.075	448.344	100.238	448.72	90.7682	447.016	88.6233	447.59	88.7498	448.93	82.6808
	446.624	108.968	450.01	102.566	450.169	99.827	449.344	99.7298	449.72	91.7809	448.016	87.9149	448.59	89.1194	449.93	83.4536
	447.624	109.284	451.01	102.701	451.169	100.375	450.344	99.5589	450.72	91.2786	449.016	88.9545	449.59	88.5385	450.93	82.8305
	448.624	108.899	452.01	102.856	452.169	99.835	451.344	100.939	451.72	91.569	450.016	88.66	450.59	87.9556	451.93	83.7515
	449.624	108.538	453.01	102.469	453.169	100.228	452.344	100.096	452.72	92.7719	451.016	88.4744	451.59	88.2138	452.93	82.8756
	450.624	108.136	454.01	103.133	454.169	99.499	453.344	100.401	453.72	92.4781	452.016	88.3427	452.59	88.5185	453.93	83.1874
	451.624	109.921	455.01	104.409	455.169	101.431	454.344	99.2629	454.72	91.0361	453.016	88.4611	453.59	88.8747	454.93	82.6606
	452.624	108.021	456.01	102.615	456.169	101.488	455.344	100.147	455.72	92.3275	454.016	88.3572	454.59	88.5084	455.93	82.7396
	453.624	108.375	457.01	102.995	457.169	101.172	456.344	101.086	456.72	91.7568	455.016	88.2272	455.59	89.6935	456.93	83.3472
	454.624	109.257	458.01	103.556	458.169	101.407	457.344	100.902	457.72	91.9896	456.016	87.875	456.59	88.8511	457.93	83.0531
	455.624	108.021	459.01	103.305	459.169	100.69	458.344	100.815	458.72	91.3736	457.016	88.1746	457.59	88.1563	458.93	82.5175
	456.624	109.267	460.01	104.681	460.169	101.032	459.344	101.275	459.72	91.8143	458.016	89.399	458.59	88.4152	459.93	83.6343
	457.624	109.594	461.01	104.236	461.169	101.665	460.344	100.617	460.72	91.5299	459.016	88.9068	459.59	89.0817	460.93	84.4914
	458.624	108.319	462.01	103.435	462.169	100.777	461.344	100.928	461.72	91.6163	460.016	88.2413	460.59	88.8572	461.93	82.8689
	459.624	110.143	463.01	103.41	463.169	100.97	462.344	100.791	462.72	92.6585	461.016	87.7638	461.59	88.8877	462.93	83.023
	460.624	110.473	464.01	103.37	464.169	100.797	463.344	100.128	463.72	91.8633	462.016	88.216	462.59	88.7801	463.93	82.5466
	461.624	108.714	465.01	104.173	465.169	101.718	464.344	100.818	464.72	92.2136	463.016	88.4367	463.59	89.0091	464.93	84.0617
	462.624	110.071	466.01	103.534	466.169	101.237	465.344	100.371	465.72	92.0529	464.016	89.4443	464.59	89.4758	465.93	83.3241
	463.624	109.337	467.01	103.066	467.169	102.766	466.344	101.534	466.72	91.9573	465.016	88.09	465.59	87.6061	466.93	82.9283
	464.624	110.046	468.01	104.607	468.169	100.849	467.344	101.238	467.72	92.1422	466.016	88.3918	466.59	88.6112	467.93	82.7177
	465.624	110.087	469.01	103.733	469.169	100.634	468.344	100.594	468.72	92.0685	467.016	89.0799	467.59	87.6884	468.93	82.8661
	466.624	109.365	470.01	105.158	470.169	102.195	469.344	100.883	469.72	92.1939	468.016	89.6019	468.59	88.8024	469.93	82.6676
	467.624	110.426	471.01	103.714	471.169	101.45	470.344	101.404	470.72	92.3558	469.016	88.3454	469.59	88.2993	470.93	82.3646
	468.624	111.067	472.01	104.419	472.169	101.107	471.344	101.521	471.72	92.2407	470.016	89.4965	470.59	88.8662	471.93	83.1912
	469.624	110.067	473.01	105.397	473.169	101.796	472.344	102.141	472.72	92.4792	471.016	89.1659	471.59	88.3787	472.93	83.0739
	470.624	110.452	474.01	103.879	474.169	101.239	473.344	100.441	473.72	91.8928	472.016	89.2886	472.59	88.4668	473.93	83.7111
	471.624	109.828	475.01	103.445	475.169	101.283	474.344	101.652	474.72	91.5191	473.016	88.3204	473.59	88.8457	474.93	82.9227
	472.624	110.132	476.01	104.834	476.169	101.678	475.344	101.165	475.72	91.7996	474.016	89.2732	474.59	88.6846	475.93	82.359
	473.624	110.939	477.01	104.042	477.169	102.454	476.344	101.368	476.72	92.1349	475.016	90.1048	475.59	88.2966	476.93	83.4568
	474.624	110.119	478.01	104.792	478.169	101.13	477.344	102.429	477.72	91.6538	476.016	88.9538	476.59	89.0098	477.93	83.2164
	475.624	109.733	479.01	105.151	479.169	102.999	478.344	102.034	478.72	92.218	477.016	89.744	477.59	88.6117	478.93	82.8128
	476.624	111.037	480.01	105.179	480.169	102.672	479.344	101.587	479.72	92.3255	478.016	88.6518	478.59	87.8002	479.93	82.1155
	477.624	110.255	481.01	104.16	481.169	102.057	480.344	101.866	480.72	93.3817	479.016	89.2664	479.59	89.4518	480.93	82.0914
	478.624	110.099	482.01	105.179	482.169	102.053	481.344	102.532	481.72	91.1917	480.016	89.9041	480.59	88.6542	481.93	83.0182
	479.624	111.693	483.01	104.915	483.169	103.044	482.344	102.111	482.72	92.902	481.016	88.7601	481.59	87.5598	482.93	83.0208
	480.624	109.893	484.01	105.97	484.169	102.295	483.344	101.437	483.72	92.7965	482.016	88.7605	482.59	88.5535	483.93	82.7672
	481.624	111.187	485.01	105.877	485.169	102.465	484.344	102.306	484.72	92.6477	483.016	88.8287	483.59	88.3013	484.93	82.5873
	482.624	111.104	486.01	104.911	486.169	102.581	485.344	101.569	485.72	93.0121	484.016	88.9416	484.59	88.8947	485.93	83.5083
	483.624	110.259	487.01	104.773	487.169	102.237	486.344	102.766	486.72	93.5482	485.016	89.1179	485.59	88.0304	486.93	83.3736
	484.624	110.582	488.01	105.496	488.169	102.509	487.344	101.357	487.72	93.0064	486.016	87.7015	486.59	88.0571	487.93	83.3496
	485.624	110.833	489.01	104.995	489.169	101.706	488.344	102.133	488.72	93.0679	487.016	89.8988	487.59	89.251	488.93	82.4972
	486.624	111.833	490.01	105.269	490.169	102.07	489.344	101.261	489.72	92.9358	488.016	89.534	488.59	88.0889	489.93	83.1608
	487.624	110.867	491.01	105.99	491.169	102.506	490.344	101.529	490.72	91.364	489.016	88.5862	489.59	89.4317	490.93	83.0351
	488.624	111.065	492.01	105.382	492.169	103.749	491.344	102.15	491.72	92.4515	490.016	89.9549	490.59	88.7411	491.93	83.7595
	489.624	112.05	493.01	105.575	493.169	102.732	492.344	101.577	492.72	92.4158	491.016	89.8851	491.59	88.5202	492.93	82.4574
	490.624	111.909	494.01	105.209	494.169	104.012	493.344	101.451	493.72	91.6012	492.016	90.0128	492.59	88.3629	493.93	83.0827
	491.624	111.894	495.01	105.677	495.169	102.591	494.344	102.113	494.72	92.797	493.016	89.897	493.59	88.4145	494.93	82.4551
	492.624	111.85	496.01	105.552	496.169	102.608	495.344	101.272	495.72	93.282	494.016	90.421	494.59	87.986	495.93	83.3451
	493.624	112.144	497.01	104.954	497.169	103.716	496.344	102.608	496.72	94.5051	495.016	89.7719	495.59	89.3744	496.93	83.4566
	494.624	111.792	498.01	105.787	498.169	103.793	497.344	102.641	497.72	94.285	496.016	89.5114	496.59	87.7237	497.93	83.3155
	495.624	112.156	499.01	106.725	499.169	101.936	498.344	102.553	498.72	92.6265	497.016	89.3939	497.59	89.1616	498.93	83.2815
	496.624	111.773	500.01	105.513	500.169	103.035	499.344	102.848	499.72	92.9848	498.016	88.8532	498.59	90.0647	499.93	82.7744
	497.624	112.337	501.01	106.347	501.169	103.538	500.344	101.863	500.72	92.3859	499.016	89.493	499.59	89.169	500.93	83.2161
	498.624	112.315	502.01	106.209	502.169	103.562	501.344	102.454	501.72	92.9767	500.016	88.8988	500.59	88.8399	501.93	83.165
	499.624	112.803	503.01	106.082	503.169	103.769	502.344	102.769	502.72	93.975	501.016	89.8089	501.59	88.6816	502.93	83.5549
	500.624	112.59	504.01	105.965	504.169	103.046	503.344	102.206	503.72	93.1077	502.016	88.6013	502.59	88.6172	503.93	83.8141
	501.624	112.052	505.01	107.666	505.169	103.343	504.344	103.254	504.72	93.1244	503.016	89.5254	503.59	88.6241	504.93	82.927
	502.624	113.044	506.01	106.662	506.169	103.18	505.344	103.129	505.72	92.6299	504.016	90.0171	504.59	89.5503	505.93	83.4412
	503.624	112.024	507.01	105.796	507.169	103.384	506.344	102.254	506.72	93.3076	505.016	88.994	505.59	89.2748	506.93	83.1424
	504.624	112.781	508.01	106.652	508.169	103.454	507.344	101.852	507.72	92.9944	506.016	89.7157	506.59	88.7043	507.93	83.584
	505.624	112.407	509.01	105.611	509.169	104.047	508.344	102.112	508.72	93.8977	507.016	89.6123	507.59	87.7107	508.93	83.8814
	506.624	112.406	510.01	106.311	510.169	103.72	509.344	103.19	509.72	93.3218	508.016	90.6866	508.59	88.8082	509.93	83.2915
	507.624	112.318	511.01	107.172	511.169	104.08	510.344	102.964	510.72	92.9198	509.016	90.1606	509.59	88.922	510.93	83.0546
	508.624	113.61	512.01	106.106	512.169	104.866	511.344	104.612	511.72	93.034	510.016	89.6587	510.59	89.1213	511.93	83.6077
	509.624	112.278	513.01	106.506	513.169	104.043	512.344	102.618	512.72	93.2712	511.016	90.0865	511.59	89.361	512.93	83.9418
	510.624	112.459	514.01	107.456	514.169	104.48	513.344	103.18	513.72	93.0654	512.016	90.1783	512.59	89.2095	513.93	83.7467
	511.624	113.568	515.01	107.583	515.169	103.612	514.344	102.621	514.72	93.7214	513.016	89.955	513.59	88.8918	514.93	83.5198
	512.624	111.767	516.01	107.336	516.169	103.975	515.344	101.54	515.72	93.4674	514.016	90.1631	514.59	88.5954	515.93	82.4363
	513.624	112.893	517.01	107.394	517.169	104.18	516.344	103.393	516.72	92.9932	515.016	89.9424	515.59	88.853	516.93	82.2898
	514.624	113.883	518.01	107.796	518.169	103.039	517.344	103.633	517.72	92.408	516.016	90.7197	516.59	88.91	517.93	83.2554
	515.624	112.474	519.01	106.748	519.169	103.86	518.344	102.253	518.72	93.061	517.016	90.2996	517.59	89.4702	518.93	82.5837
	516.624	112.963	520.01	105.733	520.169	104.162	519.344	103.289	519.72	93.5786	518.016	90.2973	518.59	88.8155	519.93	82.8434
	517.624	114.477	521.01	106.584	521.169	104.513	520.344	102.953	520.72	93.3925	519.016	90.2673	519.59	88.9374	520.93	82.6997
	518.624	113.616	522.01	107.208	522.169	104.57	521.344	103.627	521.72	93.6452	520.016	89.7288	520.59	88.7619	521.93	83.2196
	519.624	111.98	523.01	106.687	523.169	104.882	522.344	103.958	522.72	93.2497	521.016	89.5879	521.59	89.0518	522.93	82.0682
	520.624	113.371	524.01	107.074	524.169	104.514	523.344	103.21	523.72	94.834	522.016	89.8882	522.59	88.7617	523.93	82.8491
	521.624	113.263	525.01	107.979	525.169	105.107	524.344	104.364	524.72	94.725	523.016	89.6734	523.59	88.593	524.93	82.5014
	522.624	113.65	526.01	107.965	526.169	104.883	525.344	103.083	525.72	93.8693	524.016	90.6633	524.59	87.8699	525.93	83.3102
	523.624	114.239	527.01	107.662	527.169	103.889	526.344	102.589	526.72	93.455	525.016	89.4659	525.59	87.5764	526.93	83.4275
	524.624	112.63	528.01	107.476	528.169	105.156	527.344	103.626	527.72	93.8694	526.016	90.4465	526.59	89.6177	527.93	83.4492
	525.624	114.085	529.01	108.04	529.169	105.579	528.344	103.595	528.72	92.6948	527.016	90.244	527.59	89.7868	528.93	83.292
	526.624	113.774	530.01	108.229	530.169	105.39	529.344	103.631	529.72	94.0683	528.016	90.7646	528.59	88.642	529.93	84.0291
	527.624	112.564	531.01	107.785	531.169	105.319	530.344	103.266	530.72	94.9462	529.016	90.2572	529.59	88.8523	530.93	84.0515
	528.624	114.11	532.01	107.655	532.169	105.144	531.344	103.409	531.72	94.7218	530.016	90.3915	530.59	88.2981	531.93	83.6218
	529.624	113.376	533.01	107.503	533.169	104.927	532.344	104.163	532.72	93.821	531.016	91.4935	531.59	88.1691	532.93	82.442
	530.624	114.431	534.01	106.567	534.169	107.269	533.344	103.91	533.72	93.1738	532.016	90.9115	532.59	88.7543	533.93	82.4754
	531.624	114.384	535.01	107.648	535.169	105.527	534.344	103.508	534.72	93.8202	533.016	90.5032	533.59	88.5389	534.93	83.0591
	532.624	114.797	536.01	107.981	536.169	107.3	535.344	103.694	535.72	93.7123	534.016	90.3786	534.59	89.5461	535.93	83.6236
	533.624	114.662	537.01	107.496	537.169	107.27	536.344	103.381	536.72	94.6456	535.016	90.0114	535.59	89.036	536.93	82.5156
	534.624	114.146	538.01	107.709	538.169	106.654	537.344	104.058	537.72	94.4745	536.016	90.3067	536.59	89.5139	537.93	82.9758
	535.624	114.73	539.01	107.47	539.169	106.999	538.344	104.155	538.72	95.2716	537.016	91.3036	537.59	89.2034	538.93	83.4641
	536.624	114.806	540.01	108.099	540.169	107.265	539.344	103.825	539.72	94.6014	538.016	90.7035	538.59	89.0388	539.93	84.064
	537.624	115.863	541.01	110.065	541.169	105.14	540.344	103.876	540.72	94.3016	539.016	90.0449	539.59	89.5965	540.93	83.8857
	538.624	114.437	542.01	107.923	542.169	105.265	541.344	105.037	541.72	95.2785	540.016	90.2693	540.59	90.6196	541.93	83.8263
	539.624	114.98	543.01	108.894	543.169	105.879	542.344	103.829	542.72	95.3809	541.016	90.2672	541.59	88.3583	542.93	83.1248
	540.624	114.261	544.01	109.018	544.169	105.742	543.344	104.313	543.72	94.7991	542.016	90.187	542.59	89.5688	543.93	83.7261
	541.624	115.195	545.01	107.784	545.169	106.312	544.344	104.412	544.72	94.8588	543.016	90.633	543.59	88.6388	544.93	82.7358
	542.624	114.996	546.01	108.572	546.169	105.09	545.344	104.173	545.72	94.2664	544.016	90.1778	544.59	89.6947	545.93	84.8796
	543.624	113.987	547.01	107.617	547.169	106.538	546.344	104.688	546.72	94.2828	545.016	89.9098	545.59	89.3879	546.93	83.5817
	544.624	114.619	548.01	107.989	548.169	105.103	547.344	104.73	547.72	95.0767	546.016	90.406	546.59	88.7271	547.93	83.583
	545.624	113.914	549.01	108.77	549.169	106.37	548.344	104.846	548.72	93.5455	547.016	90.0065	547.59	88.6377	548.93	83.1514
	546.624	114.72	550.01	109.213	550.169	106.602	549.344	103.795	549.72	93.5578	548.016	91.6746	548.59	88.9096	549.93	83.3668
	547.624	115.477	551.01	109.347	551.169	105.618	550.344	104.636	550.72	93.8694	549.016	90.8265	549.59	88.9027	550.93	83.01
	548.624	115.272	552.01	108.246	552.169	106.24	551.344	104.947	551.72	95.6402	550.016	90.73	550.59	89.154	551.93	83.4061
	549.624	116.407	553.01	108.431	553.169	106.064	552.344	104.904	552.72	94.4644	551.016	91.7468	551.59	88.8591	552.93	83.7179
	550.624	114.444	554.01	109.293	554.169	104.762	553.344	104.997	553.72	94.4733	552.016	91.2013	552.59	89.833	553.93	83.7799
	551.624	116.162	555.01	108.783	555.169	106.006	554.344	104.443	554.72	94.2792	553.016	90.3848	553.59	90.4656	554.93	83.3282
	552.624	115.626	556.01	109.68	556.169	106.025	555.344	105.392	555.72	94.5841	554.016	90.6358	554.59	88.486	555.93	83.2983
	553.624	115.72	557.01	108.529	557.169	106.178	556.344	105.159	556.72	94.9931	555.016	90.4303	555.59	89.0018	556.93	82.9082
	554.624	115.977	558.01	109.524	558.169	106.23	557.344	104.648	557.72	94.6879	556.016	90.5553	556.59	89.0346	557.93	83.7925
	555.624	115.77	559.01	109.739	559.169	106.682	558.344	105.488	558.72	94.6996	557.016	91.4767	557.59	89.3069	558.93	82.938
	556.624	116.431	560.01	109.436	560.169	106.384	559.344	105.016	559.72	94.8195	558.016	90.1322	558.59	89.2521	559.93	83.3611
	557.624	115.876	561.01	109.565	561.169	106.949	560.344	105.27	560.72	95.506	559.016	91.7944	559.59	89.3426	560.93	84.0159
	558.624	115.518	562.01	108.885	562.169	106.436	561.344	106.841	561.72	95.144	560.016	91.6154	560.59	88.9418	561.93	83.1626
	559.624	116.7	563.01	109.503	563.169	106.531	562.344	105.325	562.72	95.0731	561.016	90.6999	561.59	89.8878	562.93	83.5088
	560.624	115.761	564.01	109.583	564.169	106.57	563.344	105.461	563.72	95.3892	562.016	90.4745	562.59	89.3559	563.93	82.8555
	561.624	115.596	565.01	109.598	565.169	107.076	564.344	104.189	564.72	96.17	563.016	91.9213	563.59	89.8449	564.93	83.3903
	562.624	114.781	566.01	109.662	566.169	107.479	565.344	104.591	565.72	94.6644	564.016	91.859	564.59	89.0645	565.93	83.2966
	563.624	117.305	567.01	109.424	567.169	105.951	566.344	104.989	566.72	94.7594	565.016	91.0443	565.59	89.7391	566.93	83.8803
	564.624	115.902	568.01	109.135	568.169	107.101	567.344	104.063	567.72	94.4659	566.016	90.8214	566.59	89.172	567.93	82.5567
	565.624	115.668	569.01	109.711	569.169	107.716	568.344	106.373	568.72	96.385	567.016	91.737	567.59	89.1322	568.93	82.9001
	566.624	115.545	570.01	109.005	570.169	106.533	569.344	105.441	569.72	95.3158	568.016	90.9196	568.59	89.3099	569.93	83.5165
	567.624	117.036	571.01	110.628	571.169	107.035	570.344	105.34	570.72	95.8254	569.016	90.4719	569.59	90.304	570.93	82.6773
	568.624	116.366	572.01	109.797	572.169	106.904	571.344	104.495	571.72	95.2494	570.016	91.1268	570.59	89.5169	571.93	83.5942
	569.624	116.022	573.01	109.735	573.169	106.732	572.344	106.011	572.72	95.1231	571.016	89.9878	571.59	89.2037	572.93	83.9684
	570.624	116.379	574.01	109.934	574.169	106.804	573.344	105.158	573.72	95.0898	572.016	91.6068	572.59	89.4886	573.93	83.1232
	571.624	116.514	575.01	109.794	575.169	107.341	574.344	106.483	574.72	95.1561	573.016	91.6666	573.59	88.6133	574.93	83.6172
	572.624	115.97	576.01	110.287	576.169	107.747	575.344	104.606	575.72	94.4485	574.016	90.7457	574.59	88.896	575.93	83.6919
	573.624	116.283	577.01	110.874	577.169	107.379	576.344	106.517	576.72	96.3766	575.016	90.4063	575.59	89.4567	576.93	83.9033
	574.624	116.294	578.01	110.286	578.169	107.731	577.344	105.372	577.72	94.8658	576.016	91.8081	576.59	89.8237	577.93	82.6597
	575.624	117.183	579.01	110.158	579.169	106.685	578.344	106.124	578.72	95.9688	577.016	90.968	577.59	88.6301	578.93	83.0115
	576.624	117.529	580.01	110.052	580.169	107.52	579.344	106.005	579.72	96.1072	578.016	90.7244	578.59	89.3841	579.93	83.7562
	577.624	117.197	581.01	110.084	581.169	108.859	580.344	105.846	580.72	94.8168	579.016	90.93	579.59	89.5373	580.93	83.2526
	578.624	117.403	582.01	110.042	582.169	108.606	581.344	106.107	581.72	95.9759	580.016	91.5747	580.59	89.0469	581.93	82.7008
	579.624	118.122	583.01	110.9	583.169	108.836	582.344	106.641	582.72	95.7277	581.016	91.5648	581.59	89.6393	582.93	83.418
	580.624	116.952	584.01	110.098	584.169	107.475	583.344	105.69	583.72	95.9072	582.016	91.3464	582.59	89.0481	583.93	82.7496
	581.624	116.787	585.01	109.935	585.169	108.3	584.344	105.48	584.72	95.7764	583.016	90.7055	583.59	89.1937	584.93	83.3131
	582.624	117.419	586.01	109.595	586.169	108.14	585.344	106.14	585.72	96.492	584.016	92.4008	584.59	89.2357	585.93	83.1716
	583.624	116.972	587.01	110.517	587.169	107.96	586.344	105.158	586.72	96.2075	585.016	90.9766	585.59	89.767	586.93	82.7877
	584.624	116.694	588.01	111.018	588.169	108.109	587.344	106.037	587.72	95.0367	586.016	91.4665	586.59	88.9127	587.93	82.3917
	585.624	117.787	589.01	111.372	589.169	108.453	588.344	106.192	588.72	96.018	587.016	91.2093	587.59	88.8245	588.93	83.3067
	586.624	117.333	590.01	111.065	590.169	108.119	589.344	106.884	589.72	95.0676	588.016	91.6463	588.59	88.4449	589.93	83.546
	587.624	118.581	591.01	110.747	591.169	108.857	590.344	106.723	590.72	95.7152	589.016	91.3143	589.59	89.6495	590.93	83.7065
	588.624	118.242	592.01	110.601	592.169	107.061	591.344	105.967	591.72	94.8189	590.016	91.8782	590.59	89.1927	591.93	82.0049
	589.624	118.729	593.01	111.267	593.169	107.998	592.344	106.572	592.72	95.1268	591.016	91.3384	591.59	90.0072	592.93	83.5098
	590.624	118.257	594.01	109.562	594.169	108.786	593.344	106.492	593.72	96.2442	592.016	90.9765	592.59	88.924	593.93	83.4657
	591.624	117.669	595.01	110.469	595.169	108.575	594.344	106.875	594.72	96.6648	593.016	92.3595	593.59	89.5136	594.93	83.3012
	592.624	117.836	596.01	111.576	596.169	108.708	595.344	107.014	595.72	96.1319	594.016	91.6843	594.59	89.5013	595.93	82.4097
	593.624	118.429	597.01	110.496	597.169	108.544	596.344	105.881	596.72	95.3775	595.016	91.9746	595.59	89.1238	596.93	83.2687
	594.624	118.048	598.01	110.619	598.169	108.305	597.344	105.859	597.72	95.782	596.016	91.7121	596.59	89.0069	597.93	83.0303
	595.624	116.798	599.01	110.136	599.169	108.362	598.344	106.17	598.72	96.2829	597.016	91.8304	597.59	89.372	598.93	83.0671
	596.624	118.027	600.01	112.287	600.169	108.625	599.344	106.681	599.72	96.0789	598.016	91.499	598.59	88.9451	599.93	83.0243
	597.624	117.739	601.01	111.278	601.169	108.63	600.344	106.47	600.72	96.1679	599.016	91.5189	599.59	90.1193	600.93	83.1411
	598.624	118.512	602.01	112.031	602.169	108.159	601.344	106.559	601.72	95.755	600.016	91.8216	600.59	90.7	601.93	83.9602
	599.624	117.51	603.01	110.817	603.169	109.044	602.344	106.893	602.72	96.2544	601.016	90.9867	601.59	89.783	602.93	83.826
	600.624	118.168	604.01	110.853	604.169	107.922	603.344	107.334	603.72	96.5224	602.016	91.3149	602.59	90.372	603.93	82.6678
	601.624	118.819	605.01	111.633	605.169	108.402	604.344	107.422	604.72	96.1309	603.016	92.3626	603.59	89.5161	604.93	82.3823
	602.624	119.476	606.01	111.554	606.169	110.127	605.344	107.369	605.72	96.9172	604.016	91.6535	604.59	89.1192	605.93	83.0534
	603.624	118.779	607.01	112.352	607.169	108.973	606.344	106.698	606.72	96.5781	605.016	91.6245	605.59	90.3651	606.93	83.3744
	604.624	118.737	608.01	111.688	608.169	108.725	607.344	107.305	607.72	95.9504	606.016	91.3413	606.59	88.4415	607.93	83.005
	605.624	119.788	609.01	111.503	609.169	109.236	608.344	107.849	608.72	95.9627	607.016	91.8603	607.59	89.4986	608.93	83.3893
	606.624	118.033	610.01	111.529	610.169	109.443	609.344	108.211	609.72	95.8156	608.016	92.7915	608.59	88.9011	609.93	83.6143
	607.624	118.621	611.01	112.072	611.169	110.123	610.344	107.633	610.72	97.3031	609.016	92.0841	609.59	89.3317	610.93	83.1563
	608.624	119.782	612.01	112.28	612.169	109.327	611.344	107.149	611.72	95.1521	610.016	91.5364	610.59	90.1911	611.93	82.6861
	609.624	117.968	613.01	112.288	613.169	109.363	612.344	108.18	612.72	96.4339	611.016	92.5998	611.59	90.1445	612.93	82.2812
	610.624	119.298	614.01	111.765	614.169	108.662	613.344	106.489	613.72	95.1906	612.016	91.6186	612.59	90.6242	613.93	83.3267
	611.624	118.761	615.01	111.569	615.169	109.503	614.344	107.448	614.72	97.1695	613.016	91.3186	613.59	89.5494	614.93	82.9938
	612.624	120.371	616.01	112.071	616.169	109.943	615.344	107.536	615.72	96.6028	614.016	91.8915	614.59	89.6422	615.93	82.9957
	613.624	118.927	617.01	110.873	617.169	110.47	616.344	107.004	616.72	96.9419	615.016	91.6297	615.59	89.4916	616.93	83.8922
	614.624	119.306	618.01	112.531	618.169	109.522	617.344	107.522	617.72	95.8754	616.016	92.2875	616.59	89.5552	617.93	82.8462
	615.624	119.636	619.01	111.933	619.169	109.626	618.344	107.005	618.72	95.795	617.016	91.8434	617.59	89.5758	618.93	83.5404
	616.624	118.147	620.01	111.19	620.169	110.157	619.344	108.131	619.72	96.1299	618.016	92.1366	618.59	90.1337	619.93	82.7565
	617.624	119.141	621.01	111.687	621.169	110.559	620.344	108.554	620.72	96.666	619.016	92.8706	619.59	88.7615	620.93	83.341
	618.624	119.056	622.01	111.749	622.169	110.106	621.344	107.694	621.72	95.7302	620.016	92.126	620.59	90.181	621.93	82.9356
	619.624	119.357	623.01	112.959	623.169	109.447	622.344	107.994	622.72	96.3445	621.016	92.5409	621.59	89.2254	622.93	83.1877
	620.624	120.222	624.01	112.578	624.169	110.047	623.344	107.838	623.72	95.8084	622.016	92.1556	622.59	88.9136	623.93	82.3358
	621.624	119.74	625.01	111.342	625.169	110.054	624.344	108.557	624.72	95.9927	623.016	93.1108	623.59	90.4054	624.93	82.3745
	622.624	119.307	626.01	111.768	626.169	110.025	625.344	107.077	625.72	96.7409	624.016	92.4835	624.59	89.5483	625.93	84.0221
	623.624	119.537	627.01	112.228	627.169	109.286	626.344	107.41	626.72	96.7979	625.016	91.9289	625.59	89.1624	626.93	82.2952
	624.624	120.156	628.01	112.97	628.169	110.176	627.344	107.73	627.72	96.5381	626.016	91.9103	626.59	90.1639	627.93	83.0737
	625.624	119.884	629.01	113.411	629.169	110.735	628.344	109.223	628.72	96.3486	627.016	92.4634	627.59	89.5292	628.93	83.3448
	626.624	119.776	630.01	112.384	630.169	111.161	629.344	107.822	629.72	96.0053	628.016	91.4752	628.59	88.8733	629.93	83.2475
	627.624	119.777	631.01	113.191	631.169	111.236	630.344	107.815	630.72	95.9687	629.016	92.4932	629.59	88.6367	630.93	83.8391
	628.624	119.448	632.01	113.404	632.169	110.071	631.344	107.769	631.72	97.0004	630.016	92.6383	630.59	90.0914	631.93	83.7877
	629.624	120.088	633.01	112.839	633.169	109.891	632.344	107.924	632.72	96.6171	631.016	92.153	631.59	89.78	632.93	83.2985
	630.624	119.289	634.01	113.23	634.169	110.699	633.344	107.984	633.72	96.0674	632.016	92.4149	632.59	89.4802	633.93	83.0907
	631.624	119.438	635.01	112.693	635.169	109.545	634.344	108.805	634.72	96.5512	633.016	91.9573	633.59	89.8634	634.93	82.6181
	632.624	119.955	636.01	112.855	636.169	110.25	635.344	108.564	635.72	96.769	634.016	91.9319	634.59	90.2968	635.93	83.3454
	633.624	120.098	637.01	112.122	637.169	110.753	636.344	107.684	636.72	96.732	635.016	91.6866	635.59	89.3995	636.93	83.0863
	634.624	119.576	638.01	113.501	638.169	110.689	637.344	107.904	637.72	96.3941	636.016	92.6746	636.59	90.1589	637.93	83.1013
	635.624	120.86	639.01	113.033	639.169	111.381	638.344	107.98	638.72	97.1918	637.016	92.4379	637.59	89.8227	638.93	82.7992
	636.624	119.512	640.01	113.565	640.169	110.057	639.344	109.079	639.72	97.7888	638.016	92.227	638.59	89.8979	639.93	82.8609
	637.624	120.28	641.01	113.669	641.169	109.89	640.344	108.159	640.72	96.4494	639.016	92.8996	639.59	89.0748	640.93	83.2115
	638.624	119.557	642.01	113.774	642.169	110.657	641.344	107.93	641.72	97.5295	640.016	92.7389	640.59	89.197	641.93	83.2915
	639.624	118.9	643.01	112.406	643.169	111.553	642.344	108.439	642.72	96.5385	641.016	92.6772	641.59	89.7276	642.93	82.3441
	640.624	119.857	644.01	114.165	644.169	110.223	643.344	108.618	643.72	97.1401	642.016	92.9461	642.59	89.1465	643.93	82.9118
	641.624	121.083	645.01	114.213	645.169	110.032	644.344	108.093	644.72	97.2347	643.016	90.6703	643.59	90.9214	644.93	83.2424
	642.624	120.531	646.01	113.485	646.169	111.316	645.344	107.176	645.72	96.4675	644.016	92.4944	644.59	90.4569	645.93	82.7984
	643.624	119.564	647.01	113.541	647.169	111.82	646.344	108.814	646.72	97.8892	645.016	92.1054	645.59	89.8366	646.93	82.5637
	644.624	121.014	648.01	113.505	648.169	111.214	647.344	108.026	647.72	96.9117	646.016	92.6635	646.59	90.6554	647.93	83.4369
	645.624	120.48	649.01	113.137	649.169	111.014	648.344	108.272	648.72	97.3743	647.016	92.0468	647.59	90.5198	648.93	82.8265
	646.624	120.828	650.01	113.935	650.169	111.968	649.344	108.821	649.72	97.7796	648.016	92.5406	648.59	89.512	649.93	83.1573
	647.624	120.316	651.01	113.98	651.169	111.108	650.344	108.539	650.72	97.0893	649.016	92.3793	649.59	90.108	650.93	83.4718
	648.624	120.312	652.01	113.549	652.169	111.802	651.344	108.45	651.72	98.3965	650.016	92.6739	650.59	89.7384	651.93	83.3339
	649.624	119.963	653.01	114.345	653.169	111.576	652.344	109.215	652.72	96.0757	651.016	92.1541	651.59	89.9836	652.93	83.505
	650.624	120.484	654.01	113.889	654.169	112.068	653.344	108.466	653.72	97.2251	652.016	92.4596	652.59	89.5907	653.93	83.3972
	651.624	119.557	655.01	114.006	655.169	111.059	654.344	108.333	654.72	96.9642	653.016	91.4752	653.59	89.2382	654.93	82.9663
	652.624	120.786	656.01	113.565	656.169	111.22	655.344	109.064	655.72	97.5428	654.016	91.7709	654.59	89.4427	655.93	82.6817
	653.624	121.153	657.01	113.819	657.169	110.925	656.344	108.951	656.72	96.448	655.016	92.4631	655.59	90	656.93	82.1013
	654.624	121.152	658.01	114.539	658.169	112.986	657.344	108.777	657.72	97.5392	656.016	92.766	656.59	89.1738	657.93	82.8822
	655.624	121.244	659.01	113.295	659.169	112.238	658.344	109.698	658.72	96.7669	657.016	92.5955	657.59	89.8033	658.93	83.2872
	656.624	120.755	660.01	114.878	660.169	112.397	659.344	109.068	659.72	98.6162	658.016	92.0045	658.59	90.5153	659.93	83.5251
	657.624	120.585	661.01	115.126	661.169	112.956	660.344	109.831	660.72	97.04	659.016	92.4175	659.59	90.6784	660.93	83.2386
	658.624	121.391	662.01	115.011	662.169	111.904	661.344	109.421	661.72	98.3722	660.016	92.025	660.59	90.0043	661.93	83.1856
	659.624	121.309	663.01	113.588	663.169	112.416	662.344	108.937	662.72	96.9349	661.016	92.6335	661.59	90.0621	662.93	84.0108
	660.624	121.541	664.01	114.629	664.169	111.185	663.344	108.834	663.72	98.1082	662.016	92.9075	662.59	89.3223	663.93	83.3988
	661.624	121.65	665.01	114.347	665.169	112.289	664.344	110.067	664.72	97.4871	663.016	93.3572	663.59	89.8994	664.93	82.604
	662.624	120.752	666.01	114.845	666.169	111.737	665.344	109.284	665.72	97.4851	664.016	93.1605	664.59	89.9006	665.93	83.2964
	663.624	121.596	667.01	114.373	667.169	112.962	666.344	109.029	666.72	97.7844	665.016	93.3611	665.59	89.9824	666.93	83.6216
	664.624	121.604	668.01	114.664	668.169	113.625	667.344	110.462	667.72	96.9432	666.016	92.9136	666.59	89.953	667.93	82.8274
	665.624	120.572	669.01	114.923	669.169	113.467	668.344	108.119	668.72	98.5648	667.016	92.741	667.59	90.2753	668.93	82.9922
	666.624	120.34	670.01	113.908	670.169	113.058	669.344	109.539	669.72	97.0926	668.016	93.2572	668.59	89.6807	669.93	82.8428
	667.624	122.266	671.01	114.454	671.169	111.016	670.344	109.067	670.72	96.5268	669.016	92.1896	669.59	89.9064	670.93	83.5944
	668.624	121.679	672.01	114.349	672.169	111.909	671.344	109.214	671.72	97.3072	670.016	92.8863	670.59	89.1026	671.93	83.5917
	669.624	121.801	673.01	114.143	673.169	112.57	672.344	109.707	672.72	97.7315	671.016	91.9309	671.59	89.6263	672.93	83.2802
	670.624	121.795	674.01	115.554	674.169	111.884	673.344	109.559	673.72	97.4222	672.016	93.2466	672.59	89.5652	673.93	83.4345
	671.624	122.812	675.01	115.654	675.169	112.407	674.344	110.094	674.72	97.9093	673.016	92.3963	673.59	89.4612	674.93	82.9276
	672.624	121.163	676.01	114.172	676.169	112.435	675.344	109.016	675.72	97.6503	674.016	93.6777	674.59	88.8408	675.93	83.5961
	673.624	121.886	677.01	115.613	677.169	113.027	676.344	109.037	676.72	98.2215	675.016	92.5159	675.59	90.2329	676.93	83.424
	674.624	122.596	678.01	115.008	678.169	112.371	677.344	109.881	677.72	97.6164	676.016	93.5188	676.59	89.8031	677.93	82.9765
	675.624	123.252	679.01	114.358	679.169	112.543	678.344	109.59	678.72	97.3007	677.016	92.7608	677.59	90.6508	678.93	82.9122
	676.624	122.083	680.01	115.166	680.169	112.931	679.344	109.821	679.72	98.2584	678.016	93.2902	678.59	89.7172	679.93	82.199
	677.624	121.354	681.01	115.072	681.169	111.688	680.344	110.299	680.72	98.007	679.016	93.5387	679.59	89.9778	680.93	83.2793
	678.624	121.979	682.01	114.863	682.169	113.466	681.344	109.48	681.72	97.8064	680.016	92.2645	680.59	90.1868	681.93	83.5243
	679.624	122.142	683.01	115.978	683.169	113.162	682.344	110.12	682.72	97.6824	681.016	93.1852	681.59	90.5365	682.93	84.0718
	680.624	121.631	684.01	116.652	684.169	113.302	683.344	110.086	683.72	98.4082	682.016	93.0327	682.59	89.4576	683.93	83.4413
	681.624	121.113	685.01	115.175	685.169	113.31	684.344	110.191	684.72	97.7294	683.016	93.3482	683.59	89.5908	684.93	83.4411
	682.624	122.63	686.01	115.18	686.169	111.861	685.344	109.225	685.72	98.1832	684.016	93.89	684.59	90.1446	685.93	82.9501
	683.624	123.085	687.01	115.804	687.169	112.571	686.344	109.258	686.72	98.9833	685.016	93.9068	685.59	90.7208	686.93	82.3839
	684.624	123.033	688.01	115.947	688.169	112.612	687.344	110.154	687.72	98.3074	686.016	93.7809	686.59	89.6919	687.93	83.6437
	685.624	121.617	689.01	115.568	689.169	112.847	688.344	110.388	688.72	97.2435	687.016	92.9652	687.59	89.0727	688.93	83.0282
	686.624	124.444	690.01	115.857	690.169	114.273	689.344	109.85	689.72	99.2238	688.016	92.1427	688.59	89.5621	689.93	84.2924
	687.624	122.048	691.01	115.6	691.169	113.869	690.344	109.082	690.72	98.7748	689.016	93.1994	689.59	89.6825	690.93	82.6963
	688.624	122.346	692.01	116.145	692.169	114.879	691.344	109.259	691.72	97.7077	690.016	92.7403	690.59	89.9175	691.93	83.1005
	689.624	123.09	693.01	116.368	693.169	113.516	692.344	110.006	692.72	98.2465	691.016	94.1574	691.59	89.9399	692.93	82.9065
	690.624	122.495	694.01	116.456	694.169	114.12	693.344	110.51	693.72	98.8063	692.016	92.4741	692.59	89.7966	693.93	83.898
	691.624	123.463	695.01	115.566	695.169	113	694.344	110.021	694.72	97.3977	693.016	93.3122	693.59	89.9957	694.93	82.9081
	692.624	122.632	696.01	116.651	696.169	113.661	695.344	110.555	695.72	98.9655	694.016	92.9751	694.59	90.1809	695.93	83.3942
	693.624	123.168	697.01	116.167	697.169	113.941	696.344	110.486	696.72	98.5969	695.016	92.6675	695.59	90.6233	696.93	82.3252
	694.624	122.978	698.01	115.815	698.169	113.262	697.344	110.184	697.72	98.4748	696.016	93.4682	696.59	90.0254	697.93	83.4622
	695.624	123.149	699.01	115.967	699.169	114.136	698.344	110.366	698.72	98.6535	697.016	92.7541	697.59	89.7173	698.93	83.3279
	696.624	122.153	700.01	116.02	700.169	114.214	699.344	110.806	699.72	98.1075	698.016	93.7622	698.59	89.3939	699.93	82.9749
	697.624	123.488	701.01	117.298	701.169	114.098	700.344	111.526	700.72	98.8112	699.016	94.0027	699.59	89.9311	700.93	83.6272
	698.624	123.614	702.01	116.648	702.169	113.265	701.344	110.235	701.72	98.0256	700.016	92.2244	700.59	90.3043	701.93	83.293
	699.624	123.389	703.01	116.648	703.169	113.949	702.344	110.712	702.72	97.9367	701.016	93.0861	701.59	89.462	702.93	83.0391
	700.624	124.268	704.01	117.304	704.169	113.323	703.344	110.535	703.72	98.3149	702.016	93.7836	702.59	90.0698	703.93	83.493
	701.624	123.957	705.01	116.893	705.169	113.66	704.344	109.898	704.72	98.4453	703.016	92.8199	703.59	90.4658	704.93	83.423
	702.624	123.389	706.01	116.26	706.169	112.891	705.344	110.321	705.72	98.2372	704.016	92.9494	704.59	89.5592	705.93	83.6659
	703.624	123.103	707.01	116.873	707.169	114.406	706.344	110.925	706.72	98.3124	705.016	93.2352	705.59	90.716	706.93	83.19
	704.624	123.921	708.01	117.952	708.169	114.194	707.344	110.711	707.72	99.1721	706.016	93.0202	706.59	89.3191	707.93	84.4339
	705.624	123.009	709.01	116.66	709.169	114.203	708.344	110.98	708.72	98.2084	707.016	93.8598	707.59	89.2066	708.93	83.5588
	706.624	123.194	710.01	117.077	710.169	113.322	709.344	110.95	709.72	98.7511	708.016	93.3663	708.59	90.1355	709.93	83.064
	707.624	124.394	711.01	116.776	711.169	114.358	710.344	111.435	710.72	99.2696	709.016	93.414	709.59	89.8819	710.93	84.2719
	708.624	125.106	712.01	116.216	712.169	115.111	711.344	110.801	711.72	99.099	710.016	93.442	710.59	90.4867	711.93	82.8988
	709.624	123.99	713.01	117.108	713.169	113.8	712.344	111.423	712.72	98.2943	711.016	92.9468	711.59	89.9565	712.93	82.852
	710.624	125.345	714.01	117.49	714.169	114.02	713.344	111.5	713.72	98.1076	712.016	93.3027	712.59	90.469	713.93	83.6875
	711.624	123.912	715.01	116.884	715.169	113.287	714.344	111.002	714.72	98.5745	713.016	92.4266	713.59	90.3722	714.93	83.5491
	712.624	123.316	716.01	117.352	716.169	114.471	715.344	111.567	715.72	98.8694	714.016	94.2161	714.59	90.0284	715.93	82.5905
	713.624	124.476	717.01	116.774	717.169	114.34	716.344	111.947	716.72	97.8516	715.016	93.3765	715.59	89.3692	716.93	83.5897
	714.624	124.937	718.01	115.991	718.169	114.598	717.344	110.938	717.72	98.48	716.016	93.5566	716.59	90.6055	717.93	83.4656
	715.624	124.558	719.01	117.962	719.169	114.29	718.344	111.021	718.72	99.2147	717.016	94.0409	717.59	90.2382	718.93	83.0459
	716.624	124.234	720.01	118.057	720.169	115.829	719.344	111.999	719.72	98.7979	718.016	94.261	718.59	90.7256	719.93	83.2961
	717.624	123.221	721.01	118.074	721.169	114.274	720.344	111.118	720.72	99.6112	719.016	93.9868	719.59	90.2916	720.93	84.1525
	718.624	123.159	722.01	117.554	722.169	115.681	721.344	111.934	721.72	98.729	720.016	93.4163	720.59	90.2934	721.93	82.4862
	719.624	124.151	723.01	117.555	723.169	114.325	722.344	111.167	722.72	99.314	721.016	93.2674	721.59	89.9383	722.93	82.9054
	720.624	124.003	724.01	116.751	724.169	114.362	723.344	111.023	723.72	98.8595	722.016	93.6479	722.59	90.7723	723.93	83.2948
	721.624	124.937	725.01	118.026	725.169	115.323	724.344	111.228	724.72	98.8689	723.016	94.0663	723.59	90.1754	724.93	83.226
	722.624	124.4	726.01	116.865	726.169	115.813	725.344	111.376	725.72	98.9168	724.016	93.8894	724.59	89.4939	725.93	82.5688
	723.624	125.137	727.01	117.52	727.169	114.684	726.344	111.444	726.72	98.4702	725.016	93.8155	725.59	89.5428	726.93	82.0256
	724.624	125.111	728.01	118.141	728.169	115.02	727.344	112.444	727.72	98.1883	726.016	93.5093	726.59	90.2654	727.93	83.0746
	725.624	125.818	729.01	118.242	729.169	114.967	728.344	112.099	728.72	98.8983	727.016	93.5191	727.59	90.7659	728.93	83.6724
	726.624	124.349	730.01	117.431	730.169	115.041	729.344	112.459	729.72	99.6104	728.016	94.2423	728.59	89.6557	729.93	83.9783
	727.624	123.399	731.01	117.687	731.169	115.071	730.344	111.415	730.72	99.1542	729.016	93.6917	729.59	90.5256	730.93	84.0763
	728.624	124.946	732.01	117.761	732.169	116.272	731.344	111.577	731.72	98.5956	730.016	93.6238	730.59	90.7865	731.93	83.9957
	729.624	125.651	733.01	118.226	733.169	115.381	732.344	112.004	732.72	99.2115	731.016	93.8647	731.59	90.8457	732.93	83.3363
	730.624	125.817	734.01	118.037	734.169	114.987	733.344	111.626	733.72	98.7336	732.016	93.5791	732.59	90.4993	733.93	83.5819
	731.624	124.936	735.01	118.635	735.169	115.141	734.344	112.337	734.72	98.2921	733.016	93.6205	733.59	90.2853	734.93	82.8082
	732.624	125.775	736.01	117.836	736.169	115.382	735.344	111.544	735.72	98.6177	734.016	93.1098	734.59	90.3267	735.93	83.2442
	733.624	124.622	737.01	117.384	737.169	115.153	736.344	111.536	736.72	99.5246	735.016	94.4306	735.59	90.7336	736.93	83.1068
	734.624	124.38	738.01	118.199	738.169	114.271	737.344	111.707	737.72	97.8253	736.016	93.7925	736.59	90.6917	737.93	83.1793
	735.624	125.091	739.01	118.123	739.169	115.624	738.344	112.73	738.72	99.4817	737.016	93.2103	737.59	90.7155	738.93	82.7665
	736.624	124.755	740.01	117.477	740.169	116.288	739.344	112.395	739.72	99.5539	738.016	93.3696	738.59	90.0475	739.93	82.5677
	737.624	124.561	741.01	118.783	741.169	116.179	740.344	111.159	740.72	98.2571	739.016	93.6895	739.59	89.8421	740.93	82.575
	738.624	125.479	742.01	118.344	742.169	114.731	741.344	112.058	741.72	99.8227	740.016	93.4482	740.59	90.5884	741.93	83.2299
	739.624	125.808	743.01	117.318	743.169	115.021	742.344	112.382	742.72	98.8154	741.016	94.0408	741.59	90.3639	742.93	82.8379
	740.624	125.736	744.01	118.421	744.169	114.883	743.344	113.03	743.72	99.7561	742.016	93.6708	742.59	91.0416	743.93	83.719
	741.624	124.688	745.01	118.735	745.169	115.264	744.344	111.731	744.72	99.3425	743.016	94.418	743.59	90.5253	744.93	82.9912
	742.624	124.705	746.01	118.19	746.169	115.986	745.344	112.435	745.72	99.7343	744.016	94.0127	744.59	90.172	745.93	83.652
	743.624	125.288	747.01	118.453	747.169	114.585	746.344	113.251	746.72	99.7321	745.016	94.564	745.59	90.3671	746.93	83.7215
	744.624	126.518	748.01	118.625	748.169	117.335	747.344	111.273	747.72	99.6714	746.016	92.8686	746.59	89.4961	747.93	83.3298
	745.624	125.714	749.01	117.735	749.169	117.084	748.344	112.767	748.72	99.5167	747.016	94.255	747.59	89.6178	748.93	83.3875
	746.624	124.07	750.01	118.556	750.169	116.198	749.344	112.64	749.72	99.4628	748.016	93.1603	748.59	91.0491	749.93	83.2672
	747.624	126.582	751.01	118.042	751.169	115.996	750.344	112.884	750.72	99.4778	749.016	93.681	749.59	91.4908	750.93	83.8443
	748.624	125.652	752.01	118.532	752.169	116.26	751.344	112.547	751.72	98.7596	750.016	93.609	750.59	90.0142	751.93	83.6307
	749.624	125.516	753.01	118.373	753.169	115.531	752.344	112.96	752.72	98.8515	751.016	94.0013	751.59	90.7462	752.93	84.1242
	750.624	125.031	754.01	119.591	754.169	116.56	753.344	111.6	753.72	99.4787	752.016	94.7642	752.59	89.9441	753.93	84.4126
	751.624	126.435	755.01	119.31	755.169	116.644	754.344	113.404	754.72	98.6427	753.016	93.7941	753.59	90.8504	754.93	82.4736
	752.624	125.734	756.01	119.089	756.169	115.645	755.344	113.04	755.72	99.4926	754.016	93.589	754.59	90.6804	755.93	83.1311
	753.624	125.666	757.01	118.194	757.169	116.397	756.344	112.173	756.72	98.6795	755.016	94.3545	755.59	90.2881	756.93	83.3181
	754.624	125.016	758.01	118.233	758.169	116.57	757.344	112.735	757.72	99.3667	756.016	94.6979	756.59	89.7796	757.93	83.1793
	755.624	126.841	759.01	120.014	759.169	115.734	758.344	111.945	758.72	99.238	757.016	94.2735	757.59	90.6693	758.93	83.2294
	756.624	125.917	760.01	118.324	760.169	116.998	759.344	113.144	759.72	99.1591	758.016	94.2784	758.59	90.2298	759.93	83.2941
	757.624	126.497	761.01	117.665	761.169	117.785	760.344	112.935	760.72	98.9991	759.016	94.1403	759.59	90.9495	760.93	83.0231
	758.624	124.916	762.01	119.533	762.169	116.651	761.344	113.028	761.72	99.1802	760.016	93.9878	760.59	90.4485	761.93	84.7596
	759.624	126.586	763.01	120.138	763.169	116.992	762.344	113.92	762.72	100.292	761.016	93.1735	761.59	91.1149	762.93	83.5099
	760.624	126.531	764.01	119.394	764.169	115.689	763.344	111.919	763.72	99.9736	762.016	94.092	762.59	90.9017	763.93	83.5115
	761.624	125.677	765.01	119.566	765.169	117.49	764.344	112.906	764.72	99.8492	763.016	94.0954	763.59	90.4527	764.93	83.8003
	762.624	127.315	766.01	119.143	766.169	116.328	765.344	112.845	765.72	99.6425	764.016	94.3919	764.59	90.2077	765.93	82.449
	763.624	126.416	767.01	119.519	767.169	116.778	766.344	112.835	766.72	100.054	765.016	94.0086	765.59	90.0548	766.93	82.7023
	764.624	125.225	768.01	119.682	768.169	116.398	767.344	113.394	767.72	100.003	766.016	93.8718	766.59	91.1884	767.93	83.1919
	765.624	127.322	769.01	120.261	769.169	116.932	768.344	113.51	768.72	99.8157	767.016	94.1836	767.59	90.2846	768.93	82.9754
	766.624	125.47	770.01	120.068	770.169	116.653	769.344	113.121	769.72	98.7747	768.016	94.3636	768.59	90.6673	769.93	83.6681
	767.624	127.289	771.01	120.245	771.169	116.826	770.344	112.832	770.72	99.6871	769.016	94.9214	769.59	90.9814	770.93	84.4737
	768.624	126.956	772.01	120.137	772.169	116.829	771.344	113.813	771.72	99.9897	770.016	93.9289	770.59	90.6557	771.93	83.7064
	769.624	126.847	773.01	118.815	773.169	116.73	772.344	113.236	772.72	100.344	771.016	95.739	771.59	90.6916	772.93	84.2954
	770.624	127.223	774.01	118.679	774.169	117.259	773.344	112.08	773.72	100.446	772.016	94.2915	772.59	90.7229	773.93	83.5372
	771.624	127.107	775.01	117.926	775.169	116.586	774.344	112.924	774.72	100.382	773.016	94.7847	773.59	90.425	774.93	82.878
	772.624	127.018	776.01	119.336	776.169	117.369	775.344	112.603	775.72	100.58	774.016	93.6868	774.59	90.132	775.93	82.7407
	773.624	126.21	777.01	120.163	777.169	117.443	776.344	114.018	776.72	99.9959	775.016	93.9256	775.59	89.8295	776.93	82.4515
	774.624	127.787	778.01	119.539	778.169	117.843	777.344	113.124	777.72	100.121	776.016	94.8941	776.59	90.2002	777.93	83.0913
	775.624	125.642	779.01	120.737	779.169	117.742	778.344	114.529	778.72	99.6168	777.016	94.5198	777.59	90.8635	778.93	84.2037
	776.624	126.652	780.01	119.138	780.169	116.828	779.344	113.531	779.72	99.0766	778.016	93.7121	778.59	90.1629	779.93	83.5546
	777.624	126.353	781.01	119.367	781.169	117.399	780.344	113.357	780.72	99.0791	779.016	94.7639	779.59	89.596	780.93	83.536
	778.624	127.686	782.01	119.522	782.169	117.311	781.344	114.214	781.72	99.7438	780.016	95.0931	780.59	90.338	781.93	83.1546
	779.624	126.574	783.01	119.534	783.169	117.447	782.344	114.362	782.72	100.492	781.016	93.6375	781.59	89.854	782.93	83.1689
	780.624	128.672	784.01	119.609	784.169	117.728	783.344	113.554	783.72	99.6993	782.016	95.2634	782.59	89.843	783.93	83.183
	781.624	126.839	785.01	120.603	785.169	118.743	784.344	114.194	784.72	100.82	783.016	95.0351	783.59	91.448	784.93	83.9985
	782.624	127.113	786.01	120.748	786.169	117.699	785.344	113.073	785.72	100.627	784.016	95.5052	784.59	90.515	785.93	82.5995
	783.624	126.917	787.01	119.835	787.169	117.948	786.344	113.488	786.72	100.082	785.016	95.5278	785.59	91.2869	786.93	83.4891
	784.624	128.157	788.01	119.771	788.169	118.259	787.344	113.463	787.72	100.014	786.016	94.4555	786.59	90.8555	787.93	82.962
	785.624	126.717	789.01	119.876	789.169	118.448	788.344	113.988	788.72	100.709	787.016	93.9937	787.59	90.7185	788.93	83.5552
	786.624	127.01	790.01	120.618	790.169	117.545	789.344	113.721	789.72	100.411	788.016	95.3849	788.59	90.7264	789.93	82.4686
	787.624	127.239	791.01	119.197	791.169	117.419	790.344	113.795	790.72	100.347	789.016	95.2196	789.59	90.5961	790.93	82.9659
	788.624	127.583	792.01	119.89	792.169	118.177	791.344	114.009	791.72	100.31	790.016	93.7029	790.59	91.1487	791.93	82.9046
	789.624	127.621	793.01	120.475	793.169	118.122	792.344	113.791	792.72	100.101	791.016	93.8915	791.59	90.3416	792.93	83.8115
	790.624	127.93	794.01	121.169	794.169	117.928	793.344	113.603	793.72	100.736	792.016	94.3842	792.59	91.0372	793.93	82.0577
	791.624	126.798	795.01	120.23	795.169	118.228	794.344	114.23	794.72	100.154	793.016	94.4381	793.59	91.9645	794.93	83.7204
	792.624	127.504	796.01	119.839	796.169	118.665	795.344	114.677	795.72	100.357	794.016	94.1544	794.59	90.5984	795.93	83.4625
	793.624	127.903	797.01	121.087	797.169	118.281	796.344	114.543	796.72	100.534	795.016	95.3677	795.59	90.6488	796.93	82.6666
	794.624	127.723	798.01	120.41	798.169	117.803	797.344	114.114	797.72	100.113	796.016	94.9548	796.59	91.1963	797.93	83.5484
	795.624	126.684	799.01	121.118	799.169	118.914	798.344	113.905	798.72	100.294	797.016	93.447	797.59	90.9414	798.93	83.4984
	796.624	127.515	800.01	119.89	800.169	118.882	799.344	113.915	799.72	100.48	798.016	95.9215	798.59	90.3378	799.93	84.256
	797.624	127.138	801.01	121.376	801.169	118.264	800.344	114.575	800.72	99.7261	799.016	94.6265	799.59	90.4467	800.93	83.8254
	798.624	129.031	802.01	120.856	802.169	118.449	801.344	114.708	801.72	101.115	800.016	95.0159	800.59	90.0562	801.93	83.2045
	799.624	128.286	803.01	119.321	803.169	118.645	802.344	113.369	802.72	100.165	801.016	94.7272	801.59	90.3483	802.93	83.7721
	800.624	127.765	804.01	121.321	804.169	118.451	803.344	113.074	803.72	100.014	802.016	95.2167	802.59	90.1075	803.93	83.2294
	801.624	128.828	805.01	120.598	805.169	118.751	804.344	113.965	804.72	101.049	803.016	95.6	803.59	90.8378	804.93	83.3176
	802.624	127.912	806.01	119.942	806.169	118.19	805.344	114.271	805.72	100.152	804.016	95.3456	804.59	90.4481	805.93	83.2915
	803.624	128.297	807.01	120.731	807.169	118.43	806.344	112.968	806.72	101.236	805.016	94.7762	805.59	89.8967	806.93	83.0058
	804.624	129.494	808.01	120.658	808.169	118.617	807.344	114.515	807.72	100.931	806.016	94.6748	806.59	90.8538	807.93	82.8517
	805.624	128.581	809.01	119.437	809.169	118.138	808.344	114.652	808.72	101.426	807.016	94.6889	807.59	90.7489	808.93	83.4471
	806.624	127.759	810.01	122.089	810.169	118.818	809.344	113.273	809.72	101.698	808.016	95.4915	808.59	90.3158	809.93	82.9093
	807.624	128.69	811.01	121.195	811.169	119.485	810.344	113.753	810.72	100.737	809.016	94.9199	809.59	91.1167	810.93	83.9149
	808.624	129.242	812.01	120.59	812.169	118.515	811.344	114.204	811.72	100.916	810.016	94.5083	810.59	89.6989	811.93	83.0942
	809.624	128.393	813.01	121.028	813.169	119.032	812.344	113.397	812.72	100.92	811.016	95.5845	811.59	90.9306	812.93	83.0229
	810.624	128.563	814.01	120.863	814.169	120.018	813.344	114.045	813.72	100.418	812.016	94.5921	812.59	90.0785	813.93	84.2284
	811.624	129.227	815.01	121.114	815.169	118.427	814.344	114.52	814.72	100.837	813.016	94.0649	813.59	91.0952	814.93	84.0174
	812.624	128.382	816.01	120.576	816.169	119.635	815.344	115.821	815.72	100.139	814.016	94.4153	814.59	91.2081	815.93	82.7833
	813.624	127.563	817.01	121.768	817.169	118.585	816.344	114.157	816.72	100.824	815.016	95.4673	815.59	91.1271	816.93	84.1087
	814.624	129.324	818.01	120.965	818.169	119.31	817.344	114.586	817.72	100.977	816.016	95.2157	816.59	90.2116	817.93	83.6037
	815.624	129.504	819.01	121.173	819.169	119.417	818.344	114.951	818.72	100.798	817.016	95.4223	817.59	91.1544	818.93	83.3756
	816.624	129.021	820.01	120.545	820.169	118.947	819.344	114.92	819.72	99.9855	818.016	94.1051	818.59	90.6951	819.93	83.525
	817.624	128.49	821.01	120.833	821.169	119.539	820.344	114.426	820.72	100.5	819.016	94.9518	819.59	90.5516	820.93	83.1368
	818.624	129.503	822.01	121.956	822.169	119.636	821.344	115.068	821.72	100.866	820.016	95.7049	820.59	91.01	821.93	82.6296
	819.624	128.235	823.01	122.746	823.169	120.235	822.344	114.992	822.72	101.145	821.016	94.4874	821.59	91.4542	822.93	83.0601
	820.624	129.339	824.01	121.427	824.169	119.141	823.344	114.608	823.72	101.672	822.016	93.761	822.59	90.2271	823.93	83.6637
	821.624	129.086	825.01	121.164	825.169	119.82	824.344	114.102	824.72	101.56	823.016	95.6934	823.59	90.6405	824.93	83.6883
	822.624	128.747	826.01	121.667	826.169	118.689	825.344	114.718	825.72	100.49	824.016	95.3849	824.59	90.6218	825.93	82.8512
	823.624	128.986	827.01	122.127	827.169	119.885	826.344	115.429	826.72	101.475	825.016	96.3382	825.59	90.266	826.93	83.267
	824.624	129.527	828.01	121.862	828.169	120.266	827.344	115.008	827.72	101.055	826.016	95.5917	826.59	90.6191	827.93	83.4778
	825.624	131.137	829.01	122.023	829.169	119.822	828.344	114.972	828.72	100.498	827.016	95.3337	827.59	90.7135	828.93	83.1141
	826.624	129.994	830.01	121.814	830.169	118.985	829.344	115.175	829.72	100.59	828.016	95.169	828.59	90.7077	829.93	83.4141
	827.624	129.48	831.01	121.389	831.169	119.736	830.344	113.92	830.72	100.833	829.016	95.7675	829.59	90.0563	830.93	82.7364
	828.624	129.23	832.01	122.725	832.169	119.677	831.344	114.85	831.72	101.281	830.016	94.3251	830.59	90.6145	831.93	82.4837
	829.624	129.174	833.01	120.953	833.169	119.698	832.344	115.308	832.72	100.6	831.016	94.9211	831.59	91.1022	832.93	82.9974
	830.624	129.834	834.01	121.837	834.169	119.578	833.344	114.994	833.72	100.731	832.016	94.4851	832.59	89.8973	833.93	83.3135
	831.624	128.871	835.01	121.707	835.169	119.7	834.344	115.401	834.72	101.467	833.016	94.7999	833.59	91.1468	834.93	83.6591
	832.624	128.69	836.01	121.867	836.169	120.019	835.344	116.044	835.72	100.481	834.016	94.9613	834.59	89.9362	835.93	82.4922
	833.624	128.064	837.01	122.288	837.169	119.554	836.344	114.983	836.72	100.596	835.016	94.992	835.59	90.0627	836.93	84.2551
	834.624	129.623	838.01	122.107	838.169	119.286	837.344	115.52	837.72	101.127	836.016	95.3573	836.59	91.0417	837.93	82.8879
	835.624	128.78	839.01	121.302	839.169	120.431	838.344	114.268	838.72	100.433	837.016	95.0142	837.59	90.5256	838.93	83.3851
	836.624	129.51	840.01	121.78	840.169	119.903	839.344	115.658	839.72	100.668	838.016	95.3931	838.59	89.7813	839.93	82.7348
	837.624	129.745	841.01	123.121	841.169	120.003	840.344	115.058	840.72	102.375	839.016	95.898	839.59	91.4844	840.93	83.2661
	838.624	127.777	842.01	121.08	842.169	118.813	841.344	114.723	841.72	100.758	840.016	95.7455	840.59	90.8099	841.93	82.5144
	839.624	129.327	843.01	123.188	843.169	120.292	842.344	115.875	842.72	101.617	841.016	94.2501	841.59	91.0609	842.93	83.2201
	840.624	130.884	844.01	121.906	844.169	119.144	843.344	115.018	843.72	101.026	842.016	95.2613	842.59	90.6171	843.93	83.0985
	841.624	129.965	845.01	121.709	845.169	121.102	844.344	115.022	844.72	101.22	843.016	95.293	843.59	90.9642	844.93	84.9289
	842.624	129.767	846.01	121.748	846.169	119.796	845.344	115.339	845.72	100.982	844.016	95.8435	844.59	90.3795	845.93	82.9575
	843.624	130.083	847.01	122.199	847.169	119.965	846.344	114.504	846.72	100.907	845.016	95.4247	845.59	91.7957	846.93	83.5419
	844.624	129.762	848.01	122.397	848.169	120.44	847.344	115.571	847.72	101.96	846.016	95.083	846.59	91.0752	847.93	83.3557
	845.624	129.31	849.01	122.268	849.169	119.953	848.344	115.533	848.72	102.134	847.016	95.9956	847.59	90.913	848.93	83.6146
	846.624	130.751	850.01	121.57	850.169	119.564	849.344	115.7	849.72	102.496	848.016	95.9839	848.59	91.3189	849.93	83.3215
	847.624	130.108	851.01	122.675	851.169	120.8	850.344	114.564	850.72	101.951	849.016	95.4359	849.59	90.7874	850.93	84.3122
	848.624	130.782	852.01	123.255	852.169	119.754	851.344	115.228	851.72	100.672	850.016	96.0072	850.59	90.621	851.93	83.9941
	849.624	129.976	853.01	122.997	853.169	120.498	852.344	115.497	852.72	101.446	851.016	95.4292	851.59	91.1644	852.93	83.2251
	850.624	129.874	854.01	123.038	854.169	121.12	853.344	116.925	853.72	100.753	852.016	95.4773	852.59	90.2431	853.93	82.9671
	851.624	130.398	855.01	122.018	855.169	120.063	854.344	116.557	854.72	101.26	853.016	94.6124	853.59	90.9467	854.93	83.3918
	852.624	130.375	856.01	121.972	856.169	121.348	855.344	116.235	855.72	101.276	854.016	95.3203	854.59	90.6884	855.93	83.3693
	853.624	130.179	857.01	122.532	857.169	120.794	856.344	116.74	856.72	102.141	855.016	95.6989	855.59	90.7386	856.93	82.7723
	854.624	130.626	858.01	122.349	858.169	120.074	857.344	116.454	857.72	100.372	856.016	95.4691	856.59	90.9536	857.93	84.1263
	855.624	130.032	859.01	122.792	859.169	120.628	858.344	115.343	858.72	101.398	857.016	95.9117	857.59	91.3149	858.93	82.2967
	856.624	131.59	860.01	124.271	860.169	121.108	859.344	115.244	859.72	101.54	858.016	95.8955	858.59	91.3397	859.93	83.9544
	857.624	129.238	861.01	123.43	861.169	120.468	860.344	115.984	860.72	101.413	859.016	95.5598	859.59	90.8661	860.93	83.391
	858.624	131.19	862.01	122.612	862.169	119.547	861.344	116.93	861.72	100.843	860.016	95.3561	860.59	90.3373	861.93	82.8448
	859.624	130.228	863.01	122.591	863.169	120.236	862.344	115.216	862.72	101.199	861.016	96.2049	861.59	90.4365	862.93	83.3283
	860.624	130.675	864.01	123.138	864.169	121.006	863.344	116.137	863.72	101.656	862.016	95.1897	862.59	90.1621	863.93	82.7033
	861.624	131.076	865.01	124.144	865.169	120.858	864.344	115.511	864.72	102.184	863.016	95.5417	863.59	90.3943	864.93	83.1554
	862.624	130.105	866.01	123.905	866.169	120.484	865.344	115.479	865.72	101.577	864.016	95.5472	864.59	91.2568	865.93	83.5338
	863.624	131.415	867.01	123.211	867.169	121.021	866.344	115.566	866.72	102.102	865.016	94.8563	865.59	90.3397	866.93	82.9059
	864.624	130.702	868.01	123.736	868.169	119.472	867.344	116.857	867.72	101.562	866.016	96.5468	866.59	90.7959	867.93	82.8466
	865.624	130.466	869.01	123.241	869.169	121.183	868.344	116.417	868.72	101.677	867.016	95.4118	867.59	91.647	868.93	83.8609
	866.624	131.693	870.01	124.456	870.169	120.81	869.344	117.507	869.72	102.096	868.016	95.729	868.59	90.2168	869.93	83.7436
	867.624	130.67	871.01	121.983	871.169	121.308	870.344	116.265	870.72	101.751	869.016	96.2138	869.59	89.9829	870.93	83.5759
	868.624	131.57	872.01	123.608	872.169	120.618	871.344	116.696	871.72	101.844	870.016	96.9352	870.59	90.879	871.93	83.1343
	869.624	130.454	873.01	122.208	873.169	122.504	872.344	116.448	872.72	102.069	871.016	95.1918	871.59	90.0862	872.93	84.373
	870.624	130.848	874.01	124.087	874.169	121.904	873.344	116.688	873.72	101.932	872.016	95.9977	872.59	91.2537	873.93	83.0329
	871.624	130.987	875.01	123.554	875.169	121.309	874.344	116.468	874.72	101.503	873.016	95.7569	873.59	90.6542	874.93	83.2194
	872.624	130.761	876.01	124.329	876.169	121.25	875.344	117.093	875.72	102.058	874.016	96.1274	874.59	92.2475	875.93	83.4255
	873.624	131.004	877.01	123.033	877.169	122.149	876.344	116.611	876.72	102.213	875.016	96.0713	875.59	91.0171	876.93	83.4501
	874.624	130.191	878.01	124.98	878.169	121.733	877.344	116.471	877.72	102.776	876.016	95.8603	876.59	90.9399	877.93	83.6201
	875.624	131.143	879.01	121.723	879.169	120.107	878.344	115.998	878.72	101.743	877.016	95.7441	877.59	91.1934	878.93	82.7519
	876.624	130.353	880.01	122.574	880.169	120.824	879.344	116.562	879.72	102.323	878.016	95.0579	878.59	90.7823	879.93	83.3441
	877.624	131.556	881.01	124.684	881.169	121.196	880.344	116.552	880.72	101.884	879.016	96.0911	879.59	90.8983	880.93	82.6115
	878.624	130.257	882.01	123.485	882.169	121.826	881.344	117.082	881.72	102.528	880.016	95.3811	880.59	90.5514	881.93	83.6078
	879.624	130.431	883.01	124.197	883.169	121.3	882.344	115.581	882.72	101.925	881.016	95.6024	881.59	91.2357	882.93	83.7874
	880.624	131.387	884.01	123.425	884.169	121.399	883.344	115.072	883.72	102.358	882.016	96.1593	882.59	91.214	883.93	83.3129
	881.624	130.667	885.01	124.911	885.169	120.97	884.344	118.425	884.72	102.637	883.016	95.6495	883.59	90.1561	884.93	83.5191
	882.624	131.704	886.01	122.903	886.169	122.692	885.344	116.691	885.72	102.369	884.016	96.3727	884.59	90.9543	885.93	83.4446
	883.624	132.338	887.01	123.725	887.169	121.775	886.344	116.602	886.72	102.002	885.016	96.4698	885.59	90.5852	886.93	82.8961
	884.624	131.599	888.01	123.586	888.169	121.659	887.344	115.991	887.72	103.156	886.016	95.7298	886.59	90.7875	887.93	83.913
	885.624	130.68	889.01	124.09	889.169	122.69	888.344	117.338	888.72	101.855	887.016	97.01	887.59	90.6026	888.93	82.861
	886.624	131.569	890.01	124.116	890.169	122.037	889.344	116.853	889.72	101.408	888.016	94.9112	888.59	91.0147	889.93	82.3585
	887.624	131.738	891.01	124.226	891.169	122.078	890.344	118.052	890.72	101.999	889.016	96.7573	889.59	91.0255	890.93	82.6122
	888.624	131.423	892.01	123.746	892.169	121.61	891.344	117.657	891.72	101.727	890.016	96.0802	890.59	91.9845	891.93	83.3814
	889.624	131.05	893.01	124.687	893.169	121.865	892.344	117.265	892.72	103.078	891.016	95.7819	891.59	90.577	892.93	83.3036
	890.624	131.741	894.01	124.182	894.169	122.504	893.344	115.888	893.72	102.018	892.016	96.6262	892.59	91.2723	893.93	84.0082
	891.624	130.874	895.01	124.364	895.169	121.825	894.344	118.406	894.72	102.331	893.016	96.2208	893.59	92.0263	894.93	82.724
	892.624	132.963	896.01	124.402	896.169	123.033	895.344	116.696	895.72	101.721	894.016	94.8593	894.59	91.6162	895.93	83.2737
	893.624	131.495	897.01	123.855	897.169	122.731	896.344	116.986	896.72	102.929	895.016	96.4095	895.59	91.1567	896.93	83.2279
	894.624	131.623	898.01	125.175	898.169	121.918	897.344	117.133	897.72	102.614	896.016	96.3985	896.59	90.678	897.93	83.0137
	895.624	130.799	899.01	124.077	899.169	121.663	898.344	117.065	898.72	102.468	897.016	96.3798	897.59	91.6055	898.93	83.6648
	896.624	133.059	900.01	124.075	900.169	122.416	899.344	117.281	899.72	102.886	898.016	95.2182	898.59	91.4237	899.93	82.7051
	897.624	131.359	901.01	124.295	901.169	122.435	900.344	116.138	900.72	103.476	899.016	96.5689	899.59	90.7571	900.93	84.3395
	898.624	132.584	902.01	123.833	902.169	121.691	901.344	116.619	901.72	102.7	900.016	97.2175	900.59	90.9887	901.93	83.3469
	899.624	130.977	903.01	125.384	903.169	120.992	902.344	117.963	902.72	102.835	901.016	95.8394	901.59	91.2247	902.93	83.022
	900.624	131.306	904.01	125.142	904.169	122.129	903.344	117.706	903.72	102.712	902.016	96.0678	902.59	91.3774	903.93	84.2673
	901.624	132.216	905.01	123.606	905.169	122.815	904.344	117.361	904.72	101.929	903.016	96.8263	903.59	92.3342	904.93	83.3027
	902.624	132.547	906.01	124.449	906.169	123.754	905.344	117.192	905.72	102.952	904.016	97.0245	904.59	91.574	905.93	83.0731
	903.624	131.659	907.01	123.238	907.169	123.003	906.344	118.044	906.72	101.895	905.016	95.939	905.59	91.3609	906.93	83.4576
	904.624	131.623	908.01	124.788	908.169	122.528	907.344	117.98	907.72	102.931	906.016	95.8286	906.59	90.8634	907.93	83.3702
	905.624	131.739	909.01	125.442	909.169	122.199	908.344	116.981	908.72	103.561	907.016	97.4844	907.59	91.3466	908.93	83.812
	906.624	132.657	910.01	123.968	910.169	120.847	909.344	118.741	909.72	103.072	908.016	95.6161	908.59	91.8008	909.93	83.7654
	907.624	132.419	911.01	125.406	911.169	122.619	910.344	118.471	910.72	102.87	909.016	97.0078	909.59	91.868	910.93	83.4281
	908.624	132.44	912.01	124.309	912.169	121.915	911.344	118.718	911.72	102.53	910.016	95.9952	910.59	90.973	911.93	83.0618
	909.624	132.442	913.01	126.446	913.169	122.907	912.344	116.031	912.72	102.979	911.016	96.426	911.59	91.2396	912.93	83.4234
	910.624	133.108	914.01	124.804	914.169	123.309	913.344	117.062	913.72	102.541	912.016	96.4799	912.59	91.2572	913.93	83.0519
	911.624	134.066	915.01	124.922	915.169	122.34	914.344	117.908	914.72	102.682	913.016	96.473	913.59	91.9502	914.93	84.2212
	912.624	133.375	916.01	125.599	916.169	122.783	915.344	117.867	915.72	102.792	914.016	96.7215	914.59	90.7565	915.93	82.7028
	913.624	132.807	917.01	124.511	917.169	121.941	916.344	118.239	916.72	102.064	915.016	97.5517	915.59	91.6647	916.93	83.4264
	914.624	132.466	918.01	124.884	918.169	122.999	917.344	118.099	917.72	102.281	916.016	96.3012	916.59	92.19	917.93	83.7338
	915.624	132.976	919.01	125.568	919.169	122.027	918.344	118.235	918.72	102.345	917.016	96.3021	917.59	90.827	918.93	83.2138
	916.624	132.572	920.01	125.183	920.169	122.68	919.344	118.162	919.72	103.432	918.016	96.1603	918.59	92.5583	919.93	83.2001
	917.624	132.896	921.01	125.868	921.169	122.693	920.344	118.078	920.72	103.694	919.016	95.9856	919.59	90.91	920.93	83.51
	918.624	133.106	922.01	124.8	922.169	124.24	921.344	118.489	921.72	103.124	920.016	97.0395	920.59	90.8316	921.93	83.2237
	919.624	132.793	923.01	124.933	923.169	122.443	922.344	117.475	922.72	102.414	921.016	96.0266	921.59	91.9396	922.93	84.3911
	920.624	133.253	924.01	124.866	924.169	122.188	923.344	117.422	923.72	101.969	922.016	95.8213	922.59	91.9929	923.93	84.2796
	921.624	133.306	925.01	125.679	925.169	123.243	924.344	119.466	924.72	102.963	923.016	96.2896	923.59	91.007	924.93	82.8516
	922.624	133.756	926.01	124.788	926.169	124.036	925.344	118.373	925.72	102.473	924.016	96.0888	924.59	90.4598	925.93	83.109
	923.624	132.845	927.01	125.918	927.169	122.321	926.344	118.423	926.72	103.67	925.016	96.2844	925.59	91.7614	926.93	83.2671
	924.624	133.101	928.01	124.188	928.169	123.426	927.344	118.345	927.72	103.21	926.016	96.7393	926.59	91.5777	927.93	83.3364
	925.624	133.171	929.01	125.835	929.169	122.947	928.344	117.468	928.72	103.384	927.016	96.3607	927.59	92.7843	928.93	82.7745
	926.624	132.44	930.01	124.705	930.169	123.188	929.344	119.028	929.72	104.501	928.016	96.4864	928.59	90.9924	929.93	83.8803
	927.624	132.462	931.01	124.312	931.169	122.832	930.344	118.359	930.72	103.746	929.016	95.8294	929.59	91.1624	930.93	83.3592
	928.624	132.854	932.01	124.381	932.169	123.712	931.344	118.426	931.72	103.415	930.016	97.349	930.59	91.8333	931.93	83.5375
	929.624	133.81	933.01	126.356	933.169	123.418	932.344	119.392	932.72	101.968	931.016	96.6117	931.59	91.8723	932.93	83.0491
	930.624	133.822	934.01	124.259	934.169	124.258	933.344	118.814	933.72	102.942	932.016	96.4376	932.59	91.4703	933.93	83.9217
	931.624	133.215	935.01	125.34	935.169	123.964	934.344	118.066	934.72	103.749	933.016	96.1679	933.59	90.7521	934.93	83.2487
	932.624	133.02	936.01	125.064	936.169	124.462	935.344	118.193	935.72	103.14	934.016	95.6724	934.59	92.2284	935.93	84.7775
	933.624	134.182	937.01	125.346	937.169	121.849	936.344	119.064	936.72	102.719	935.016	96.2696	935.59	92.2198	936.93	82.9604
	934.624	132.495	938.01	124.708	938.169	123.261	937.344	118.132	937.72	103.572	936.016	96.8045	936.59	90.6515	937.93	83.9459
	935.624	133.325	939.01	125.782	939.169	122.431	938.344	118.015	938.72	102.847	937.016	97.8048	937.59	91.2737	938.93	83.5436
	936.624	133.654	940.01	125.541	940.169	123.316	939.344	117.993	939.72	104.54	938.016	95.4374	938.59	91.6409	939.93	83.4805
	937.624	133.026	941.01	125.858	941.169	123.751	940.344	118.788	940.72	103.28	939.016	96.8221	939.59	90.7048	940.93	82.8518
	938.624	133.331	942.01	124.98	942.169	123.859	941.344	118.108	941.72	104.061	940.016	96.2841	940.59	91.0529	941.93	83.4927
	939.624	133.624	943.01	125.496	943.169	124.163	942.344	118.818	942.72	103.244	941.016	96.603	941.59	91.7744	942.93	83.4893
	940.624	133.273	944.01	125.456	944.169	123.577	943.344	117.977	943.72	104.301	942.016	96.6491	942.59	91.2618	943.93	83.4576
	941.624	133.438	945.01	125.735	945.169	124.146	944.344	119.711	944.72	102.761	943.016	96.9576	943.59	91.3298	944.93	83.5543
	942.624	132.331	946.01	125.839	946.169	123.708	945.344	119.116	945.72	104.211	944.016	96.9161	944.59	91.4704	945.93	83.3483
	943.624	133.758	947.01	126.506	947.169	123.287	946.344	119.333	946.72	103.33	945.016	96.5635	945.59	91.5931	946.93	83.8045
	944.624	133.298	948.01	125.69	948.169	123.627	947.344	117.741	947.72	104.123	946.016	96.3858	946.59	91.6166	947.93	83.4796
	945.624	132.96	949.01	126.416	949.169	122.858	948.344	118.822	948.72	103.268	947.016	97.0237	947.59	90.6722	948.93	83.1158
	946.624	134.095	950.01	125.678	950.169	124.348	949.344	118.805	949.72	103.759	948.016	97.5223	948.59	91.2528	949.93	82.9154
	947.624	134.411	951.01	125.812	951.169	123.649	950.344	118.858	950.72	104.378	949.016	96.3645	949.59	91.0923	950.93	83.5169
	948.624	134.798	952.01	127.017	952.169	123.379	951.344	118.756	951.72	103.543	950.016	95.9652	950.59	90.7839	951.93	83.5111
	949.624	133.798	953.01	126.735	953.169	123.347	952.344	119.843	952.72	102.62	951.016	95.8464	951.59	90.6936	952.93	83.0963
	950.624	133.836	954.01	126.265	954.169	123.526	953.344	118.641	953.72	104.479	952.016	96.1611	952.59	90.9913	953.93	83.0008
	951.624	133.53	955.01	126.216	955.169	123.838	954.344	119.11	954.72	104.022	953.016	96.9321	953.59	91.7001	954.93	82.8552
	952.624	133.031	956.01	127.132	956.169	123.838	955.344	119.927	955.72	102.914	954.016	97.6079	954.59	91.0769	955.93	83.9425
	953.624	134.824	957.01	125.672	957.169	124.001	956.344	118.923	956.72	103.567	955.016	96.2437	955.59	91.5383	956.93	82.7565
	954.624	134.495	958.01	126.375	958.169	124.864	957.344	118.234	957.72	103.111	956.016	97.1892	956.59	91.3997	957.93	82.8088
	955.624	135.395	959.01	127.578	959.169	125.044	958.344	118.528	958.72	103.352	957.016	96.704	957.59	91.5697	958.93	83.5609
	956.624	134.4	960.01	126.322	960.169	123.951	959.344	119.512	959.72	103.578	958.016	96.7414	958.59	91.5057	959.93	83.4276
	957.624	134.486	961.01	125.256	961.169	124.854	960.344	119.179	960.72	104.081	959.016	97.7528	959.59	91.8932	960.93	83.4278
	958.624	133.842	962.01	125.933	962.169	125.428	961.344	119.647	961.72	104.136	960.016	96.5666	960.59	91.612	961.93	83.692
	959.624	133.91	963.01	126.537	963.169	124.782	962.344	119.351	962.72	103.821	961.016	97.0174	961.59	92.0161	962.93	83.3684
	960.624	133.61	964.01	126.821	964.169	123.99	963.344	119.357	963.72	103.833	962.016	96.5513	962.59	92.3263	963.93	82.7284
	961.624	133.465	965.01	126.278	965.169	124.426	964.344	118.893	964.72	103.766	963.016	97.1816	963.59	91.5178	964.93	82.8789
	962.624	133.869	966.01	126.323	966.169	123.993	965.344	118.031	965.72	104.261	964.016	96.292	964.59	91.5314	965.93	83.6694
	963.624	134.809	967.01	126.889	967.169	124.91	966.344	119.526	966.72	104.295	965.016	98.1063	965.59	91.8015	966.93	83.5189
	964.624	134.782	968.01	127.347	968.169	124.758	967.344	120.183	967.72	104.308	966.016	96.5492	966.59	91.2454	967.93	82.5409
	965.624	134.029	969.01	127.029	969.169	123.844	968.344	120.094	968.72	103.319	967.016	98.188	967.59	92.262	968.93	83.2409
	966.624	134.605	970.01	127.494	970.169	124.459	969.344	119.16	969.72	104.188	968.016	97.9107	968.59	90.875	969.93	83.4551
	967.624	135.23	971.01	126.935	971.169	124.591	970.344	119.203	970.72	103.353	969.016	97.0171	969.59	90.6515	970.93	84.2074
	968.624	136.302	972.01	125.932	972.169	125.186	971.344	118.693	971.72	104.339	970.016	97.7516	970.59	92.1607	971.93	83.6968
	969.624	133.943	973.01	125.294	973.169	123.286	972.344	118.741	972.72	104.359	971.016	96.5867	971.59	92.0405	972.93	84.9936
	970.624	134.949	974.01	126.737	974.169	124.952	973.344	119.28	973.72	103.969	972.016	97.4347	972.59	91.7163	973.93	83.7245
	971.624	134.735	975.01	127.157	975.169	124.936	974.344	119.387	974.72	103.491	973.016	96.5749	973.59	92.3918	974.93	82.9362
	972.624	135.5	976.01	126.584	976.169	124.76	975.344	118.665	975.72	104.872	974.016	97.2705	974.59	92.1763	975.93	82.8694
	973.624	134.878	977.01	127.016	977.169	125.133	976.344	120.683	976.72	104.087	975.016	97.0617	975.59	91.2709	976.93	83.3229
	974.624	135.294	978.01	128.662	978.169	124.736	977.344	119.084	977.72	104.543	976.016	96.4331	976.59	91.2358	977.93	83.982
	975.624	135.669	979.01	126.871	979.169	124.387	978.344	119.174	978.72	103.866	977.016	97.8042	977.59	91.4801	978.93	84.0454
	976.624	133.941	980.01	128.075	980.169	125.271	979.344	119.466	979.72	104.383	978.016	97.191	978.59	91.022	979.93	83.7511
	977.624	135.672	981.01	127.332	981.169	126.484	980.344	120.058	980.72	104.286	979.016	96.8574	979.59	92.2091	980.93	82.9522
	978.624	135.199	982.01	127.045	982.169	125.784	981.344	119.395	981.72	104.391	980.016	96.6277	980.59	90.8404	981.93	84.0298
	979.624	135.045	983.01	127.525	983.169	124.06	982.344	119.365	982.72	103.892	981.016	96.4186	981.59	91.1441	982.93	83.6868
	980.624	135.229	984.01	127.363	984.169	124.969	983.344	119.874	983.72	104.928	982.016	96.9102	982.59	91.4531	983.93	83.7329
	981.624	134.627	985.01	125.905	985.169	125.445	984.344	119.261	984.72	104.198	983.016	97.255	983.59	91.7078	984.93	83.5796
	982.624	135.362	986.01	127.956	986.169	125.344	985.344	119.985	985.72	104.51	984.016	96.7002	984.59	91.232	985.93	84.225
	983.624	135.449	987.01	127.035	987.169	124.216	986.344	118.772	986.72	102.794	985.016	97.8585	985.59	92.1929	986.93	83.0616
	984.624	135.03	988.01	126.588	988.169	125.475	987.344	120.91	987.72	104.078	986.016	97.6888	986.59	91.0895	987.93	83.8011
	985.624	134.989	989.01	126.481	989.169	124.456	988.344	120.013	988.72	104.339	987.016	96.8015	987.59	91.9244	988.93	82.6741
	986.624	135.675	990.01	128.065	990.169	124.644	989.344	120.506	989.72	104.105	988.016	96.5371	988.59	91.219	989.93	83.5222
	987.624	136.386	991.01	127.417	991.169	125.247	990.344	120.081	990.72	105.045	989.016	96.3927	989.59	92.4241	990.93	83.3598
	988.624	135.164	992.01	127.651	992.169	125.639	991.344	119.391	991.72	104.418	990.016	97.0551	990.59	91.5361	991.93	83.3133
	989.624	135.512	993.01	129.05	993.169	125.19	992.344	119.806	992.72	103.15	991.016	96.9351	991.59	91.5768	992.93	83.0362
	990.624	136.599	994.01	127.48	994.169	125.265	993.344	120.024	993.72	104.317	992.016	96.2467	992.59	91.7941	993.93	83.5515
	991.624	136.106	995.01	128.048	995.169	125.689	994.344	119.828	994.72	104.244	993.016	96.6257	993.59	90.6588	994.93	83.0948
	992.624	135.235	996.01	126.97	996.169	126.134	995.344	119.788	995.72	103.759	994.016	97.2063	994.59	91.9975	995.93	83.6463
	993.624	135.474	997.01	128.176	997.169	125.501	996.344	120.416	996.72	104.289	995.016	96.545	995.59	92.4351	996.93	83.7027
	994.624	135.329	998.01	127.638	998.169	125.723	997.344	120.792	997.72	103.42	996.016	96.7992	996.59	91.4002	997.93	83.3702
	995.624	135.947	999.01	127.095	999.169	126.172	998.344	120.062	998.72	104.256	997.016	96.7998	997.59	90.788	998.93	83.1636
	996.624	135.941	1000.01	127.089	1000.17	125.763	999.344	120.964	999.72	104.27	998.016	97.4746	998.59	91.8519	999.93	83.3379
	997.624	136.236	1001.01	127.155	1001.17	125.481	1000.34	120.162	1000.72	104.275	999.016	97.5926	999.59	91.4023	1000.93	82.8241
	998.624	136.006	1002.01	127.835	1002.17	124.721	1001.34	120.26	1001.72	104.294	1000.02	97.5265	1000.59	92.3475	1001.93	83.0776
	999.624	135.975	1003.01	127.719	1003.17	126.12	1002.34	120.207	1002.72	103.913	1001.02	96.6154	1001.59	91.7687	1002.93	83.399
	1000.62	135.779	1004.01	127.509	1004.17	126.537	1003.34	121.06	1003.72	104.577	1002.02	96.8298	1002.59	91.4355	1003.93	84.2449
	1001.62	137.087	1005.01	127.19	1005.17	125.548	1004.34	120.66	1004.72	105.167	1003.02	97.252	1003.59	91.7718	1004.93	83.5295
	1002.62	135.345	1006.01	127.662	1006.17	125.22	1005.34	120.203	1005.72	104.788	1004.02	97.7478	1004.59	91.9253	1005.93	84.2765
	1003.62	135.214	1007.01	128.059	1007.17	125.979	1006.34	120.961	1006.72	104.82	1005.02	97.0575	1005.59	92.6366	1006.93	83.0268
	1004.62	135.578	1008.01	127.732	1008.17	125.493	1007.34	120.613	1007.72	104.13	1006.02	97.2802	1006.59	91.4124	1007.93	83.5054
	1005.62	135.52	1009.01	127.85	1009.17	126.19	1008.34	121.16	1008.72	104.494	1007.02	98.2089	1007.59	91.1469	1008.93	82.7486
	1006.62	136.724	1010.01	129.081	1010.17	125.913	1009.34	120.03	1009.72	106.342	1008.02	97.5343	1008.59	91.3616	1009.93	84.4225
	1007.62	136.548	1011.01	127.967	1011.17	125.018	1010.34	120.696	1010.72	104.831	1009.02	96.9463	1009.59	92.2739	1010.93	83.2475
	1008.62	135.793	1012.01	128.953	1012.17	127.028	1011.34	120.864	1011.72	105.548	1010.02	98.2587	1010.59	92.3937	1011.93	83.5189
	1009.62	136.35	1013.01	128.869	1013.17	125.923	1012.34	120.761	1012.72	104.325	1011.02	97.2145	1011.59	90.7578	1012.93	83.6678
	1010.62	136.099	1014.01	127.252	1014.17	126.618	1013.34	120.27	1013.72	104.535	1012.02	97.0828	1012.59	91.7141	1013.93	83.392
	1011.62	135.011	1015.01	127.804	1015.17	125.897	1014.34	120.392	1014.72	105.086	1013.02	97.2627	1013.59	92.0138	1014.93	83.3092
	1012.62	136.136	1016.01	128.081	1016.17	126.652	1015.34	121.108	1015.72	104.483	1014.02	98.4955	1014.59	92.8565	1015.93	83.56
	1013.62	136.108	1017.01	128.544	1017.17	126.246	1016.34	121.558	1016.72	104.039	1015.02	96.5552	1015.59	91.8265	1016.93	82.8789
	1014.62	137.061	1018.01	129.087	1018.17	124.971	1017.34	119.966	1017.72	104.622	1016.02	96.9653	1016.59	91.8359	1017.93	83.7357
	1015.62	136.203	1019.01	126.364	1019.17	126.35	1018.34	121.249	1018.72	103.965	1017.02	97.5496	1017.59	92.1326	1018.93	83.078
	1016.62	136.105	1020.01	128.489	1020.17	127.604	1019.34	120.124	1019.72	105.407	1018.02	97.798	1018.59	91.4519	1019.93	84.0032
	1017.62	136.872	1021.01	128.631	1021.17	126.586	1020.34	120.623	1020.72	106.297	1019.02	98.0749	1019.59	91.9074	1020.93	84.7451
	1018.62	136.069	1022.01	127.734	1022.17	126.672	1021.34	121.286	1021.72	104.346	1020.02	96.7453	1020.59	91.2122	1021.93	82.8308
	1019.62	136.475	1023.01	127.642	1023.17	127.25	1022.34	121.024	1022.72	104.783	1021.02	98.3513	1021.59	91.6575	1022.93	83.2826
	1020.62	136.937	1024.01	129.503	1024.17	124.943	1023.34	121.602	1023.72	104.966	1022.02	97.6982	1022.59	93.3208	1023.93	84.0798
	1021.62	135.082	1025.01	128.57	1025.17	127.136	1024.34	120.898	1024.72	104.746	1023.02	96.3111	1023.59	91.8204	1024.93	83.4106
	1022.62	136.567	1026.01	127.199	1026.17	126.773	1025.34	121.634	1025.72	104.03	1024.02	97.7415	1024.59	92.6129	1025.93	83.7997
	1023.62	137.172	1027.01	127.428	1027.17	126.37	1026.34	120.837	1026.72	105.57	1025.02	97.6504	1025.59	90.6765	1026.93	83.0927
	1024.62	135.874	1028.01	128.904	1028.17	126.527	1027.34	120.739	1027.72	104.411	1026.02	97.4959	1026.59	91.2496	1027.93	83.1445
	1025.62	136.721	1029.01	128.616	1029.17	126.73	1028.34	120.502	1028.72	105.596	1027.02	97.6292	1027.59	91.1469	1028.93	83.3868
	1026.62	137.046	1030.01	129.275	1030.17	127.471	1029.34	121.55	1029.72	104.977	1028.02	96.7904	1028.59	92.04	1029.93	82.8365
	1027.62	136.825	1031.01	127.992	1031.17	126.099	1030.34	120.834	1030.72	104.89	1029.02	98.0147	1029.59	92.5241	1030.93	82.9908
	1028.62	136.29	1032.01	129.501	1032.17	126.576	1031.34	120.978	1031.72	105.27	1030.02	98.043	1030.59	92.6452	1031.93	83.6694
	1029.62	137.085	1033.01	128.489	1033.17	126.519	1032.34	120.437	1032.72	105.594	1031.02	97.5107	1031.59	92.3934	1032.93	83.5654
	1030.62	136.86	1034.01	128.651	1034.17	126.806	1033.34	120.747	1033.72	104.986	1032.02	97.1148	1032.59	92.1926	1033.93	83.7462
	1031.62	136.124	1035.01	129.141	1035.17	125.75	1034.34	121.623	1034.72	104.774	1033.02	98.1242	1033.59	91.4559	1034.93	83.6256
	1032.62	136.548	1036.01	128.862	1036.17	127.709	1035.34	122.285	1035.72	104.358	1034.02	97.3702	1034.59	92.1129	1035.93	83.2459
	1033.62	136.061	1037.01	128.926	1037.17	126.42	1036.34	121.966	1036.72	104.35	1035.02	97.3572	1035.59	92.2113	1036.93	82.913
	1034.62	137.701	1038.01	128.863	1038.17	126.279	1037.34	120.936	1037.72	104.993	1036.02	96.867	1036.59	92.7825	1037.93	83.5779
	1035.62	137.198	1039.01	128.637	1039.17	127.483	1038.34	121.914	1038.72	106.001	1037.02	97.9316	1037.59	91.5959	1038.93	83.2051
	1036.62	136.804	1040.01	129.142	1040.17	127.536	1039.34	121.085	1039.72	105.087	1038.02	97.5485	1038.59	92.2882	1039.93	83.4713
	1037.62	137.762	1041.01	129.939	1041.17	126.126	1040.34	120.234	1040.72	105.782	1039.02	98.0746	1039.59	91.8419	1040.93	83.9718
	1038.62	137.306	1042.01	129.683	1042.17	127.368	1041.34	121.891	1041.72	105.154	1040.02	97.6612	1040.59	92.6071	1041.93	83.3598
	1039.62	136.989	1043.01	128.092	1043.17	127.541	1042.34	122.194	1042.72	104.549	1041.02	97.098	1041.59	91.8379	1042.93	82.5507
	1040.62	137.277	1044.01	129.516	1044.17	128.506	1043.34	122.227	1043.72	104.338	1042.02	96.8326	1042.59	92.0683	1043.93	83.6125
	1041.62	138.754	1045.01	128.807	1045.17	127.596	1044.34	121.794	1044.72	106.563	1043.02	97.3454	1043.59	91.0814	1044.93	83.0339
	1042.62	137.289	1046.01	129.079	1046.17	126.812	1045.34	121.711	1045.72	105.53	1044.02	98.4253	1044.59	91.5828	1045.93	83.4971
	1043.62	137.686	1047.01	129.853	1047.17	127.097	1046.34	121.515	1046.72	104.775	1045.02	98.2708	1045.59	91.3989	1046.93	82.9578
	1044.62	136.028	1048.01	128.878	1048.17	126.612	1047.34	120.728	1047.72	105.6	1046.02	98.5193	1046.59	91.8188	1047.93	84.2331
	1045.62	138.388	1049.01	128.857	1049.17	127.505	1048.34	120.243	1048.72	105.781	1047.02	98.6961	1047.59	92.059	1048.93	82.7769
	1046.62	136.799	1050.01	129.981	1050.17	126.522	1049.34	121.958	1049.72	104.869	1048.02	97.1525	1048.59	91.5638	1049.93	83.4679
	1047.62	137.847	1051.01	130.109	1051.17	127.537	1050.34	121.17	1050.72	105.375	1049.02	98.2912	1049.59	92.1444	1050.93	83.8099
	1048.62	138.117	1052.01	129.281	1052.17	127.355	1051.34	122.037	1051.72	105.667	1050.02	97.6664	1050.59	92.416	1051.93	83.1582
	1049.62	138.015	1053.01	128.991	1053.17	128.16	1052.34	121.318	1052.72	104.989	1051.02	97.1529	1051.59	92.0181	1052.93	82.9162
	1050.62	137.306	1054.01	129.847	1054.17	127.337	1053.34	122.11	1053.72	105.878	1052.02	97.5237	1052.59	91.1059	1053.93	83.2983
	1051.62	137.688	1055.01	127.672	1055.17	127.378	1054.34	121.088	1054.72	105.749	1053.02	98.4552	1053.59	91.4284	1054.93	83.8714
	1052.62	137.196	1056.01	129.892	1056.17	126.791	1055.34	122.412	1055.72	105.778	1054.02	97.4602	1054.59	91.107	1055.93	83.1476
	1053.62	137.445	1057.01	129.456	1057.17	127.76	1056.34	121.472	1056.72	105.638	1055.02	98.2594	1055.59	91.7167	1056.93	82.6762
	1054.62	137.332	1058.01	128.811	1058.17	127.273	1057.34	122.742	1057.72	106.008	1056.02	97.0857	1056.59	91.4054	1057.93	84.1188
	1055.62	138.754	1059.01	130.339	1059.17	128.283	1058.34	122.46	1058.72	105.991	1057.02	97.4799	1057.59	92.1095	1058.93	84.0437
	1056.62	137.935	1060.01	130.536	1060.17	127.486	1059.34	121.178	1059.72	105.118	1058.02	97.4566	1058.59	91.8997	1059.93	84.0892
	1057.62	137.2	1061.01	130.127	1061.17	127.081	1060.34	121.957	1060.72	105.364	1059.02	97.5246	1059.59	91.8222	1060.93	83.4822
	1058.62	138.866	1062.01	130.249	1062.17	126.763	1061.34	121.874	1061.72	104.673	1060.02	98.5031	1060.59	91.3603	1061.93	83.6722
	1059.62	137.562	1063.01	130.191	1063.17	126.217	1062.34	122.127	1062.72	105.035	1061.02	98.2526	1061.59	92.1335	1062.93	83.815
	1060.62	138.489	1064.01	129.931	1064.17	127.29	1063.34	122.364	1063.72	105.015	1062.02	97.8406	1062.59	91.4499	1063.93	83.939
	1061.62	138.098	1065.01	130.492	1065.17	127.143	1064.34	122.381	1064.72	105.019	1063.02	98.339	1063.59	92.6042	1064.93	84.7037
	1062.62	137.819	1066.01	129.432	1066.17	126.641	1065.34	122.866	1065.72	104.859	1064.02	98.6714	1064.59	91.1754	1065.93	83.3477
	1063.62	137.679	1067.01	130.39	1067.17	127.403	1066.34	121.314	1066.72	104.507	1065.02	97.4618	1065.59	91.9566	1066.93	83.0698
	1064.62	137.782	1068.01	128.748	1068.17	127.05	1067.34	121.944	1067.72	105.289	1066.02	98.7643	1066.59	91.4909	1067.93	83.4189
	1065.62	138.512	1069.01	130.341	1069.17	127.188	1068.34	122	1068.72	105.945	1067.02	97.9821	1067.59	92.7342	1068.93	83.4541
	1066.62	138.802	1070.01	130.362	1070.17	127.251	1069.34	121.626	1069.72	105.472	1068.02	98.75	1068.59	92.7257	1069.93	83.2623
	1067.62	137.226	1071.01	130.815	1071.17	127.114	1070.34	121.541	1070.72	106.028	1069.02	98.5123	1069.59	91.7141	1070.93	83.6204
	1068.62	138.97	1072.01	129.536	1072.17	127.191	1071.34	122.441	1071.72	106.081	1070.02	98.2723	1070.59	91.4531	1071.93	83.5736
	1069.62	138.782	1073.01	130.809	1073.17	127.414	1072.34	121.843	1072.72	106.688	1071.02	97.3714	1071.59	93.2092	1072.93	84.141
	1070.62	138.5	1074.01	129.665	1074.17	128.115	1073.34	122.549	1073.72	105.386	1072.02	97.8626	1072.59	92.378	1073.93	83.0327
	1071.62	138.086	1075.01	129.23	1075.17	128.935	1074.34	123.247	1074.72	106.458	1073.02	97.6996	1073.59	91.8016	1074.93	82.6612
	1072.62	138.188	1076.01	130.455	1076.17	129.079	1075.34	123.035	1075.72	104.747	1074.02	99.0814	1074.59	92.3638	1075.93	83.7093
	1073.62	137.394	1077.01	129.423	1077.17	127.952	1076.34	122.138	1076.72	105.702	1075.02	98.0776	1075.59	92.2827	1076.93	84.1339
	1074.62	137.99	1078.01	130.409	1078.17	127.858	1077.34	121.785	1077.72	105.704	1076.02	98.2234	1076.59	92.3696	1077.93	83.9435
	1075.62	138.339	1079.01	131.292	1079.17	127.608	1078.34	122.248	1078.72	105.133	1077.02	98.2441	1077.59	91.8989	1078.93	83.5125
	1076.62	137.894	1080.01	130.712	1080.17	127.535	1079.34	122.038	1079.72	105.278	1078.02	98.1691	1078.59	92.2946	1079.93	84.034
	1077.62	138.767	1081.01	130.345	1081.17	128.851	1080.34	122.052	1080.72	106.225	1079.02	98.4876	1079.59	92.5206	1080.93	83.1002
	1078.62	138.804	1082.01	129.482	1082.17	129.526	1081.34	122.006	1081.72	106.042	1080.02	97.5391	1080.59	92.5687	1081.93	83.4895
	1079.62	137.611	1083.01	129.829	1083.17	129.064	1082.34	122.942	1082.72	105.719	1081.02	98.6933	1081.59	92.511	1082.93	83.6771
	1080.62	138.285	1084.01	130.396	1084.17	128.784	1083.34	123.52	1083.72	104.885	1082.02	97.3732	1082.59	92.5517	1083.93	83.6056
	1081.62	138.276	1085.01	130.775	1085.17	127.741	1084.34	121.612	1084.72	105.903	1083.02	97.3408	1083.59	92.0809	1084.93	83.4409
	1082.62	138.031	1086.01	130.464	1086.17	128.842	1085.34	122.911	1085.72	106.373	1084.02	97.9116	1084.59	92.2064	1085.93	83.1706
	1083.62	139.85	1087.01	130.781	1087.17	128.639	1086.34	121.949	1086.72	105.078	1085.02	97.1555	1085.59	92.5709	1086.93	83.2183
	1084.62	139.69	1088.01	130.427	1088.17	128.338	1087.34	123.478	1087.72	105.553	1086.02	97.3833	1086.59	91.3268	1087.93	82.8172
	1085.62	139.346	1089.01	129.718	1089.17	128.34	1088.34	123.89	1088.72	105.969	1087.02	97.3986	1087.59	91.6825	1088.93	82.9573
	1086.62	139.134	1090.01	130.478	1090.17	129.368	1089.34	123.5	1089.72	106.061	1088.02	98.1841	1088.59	91.7953	1089.93	83.1242
	1087.62	138.299	1091.01	131.25	1091.17	128.989	1090.34	121.984	1090.72	105.334	1089.02	97.2214	1089.59	92.1704	1090.93	83.4486
	1088.62	139.406	1092.01	130.506	1092.17	128.663	1091.34	122.741	1091.72	106.431	1090.02	97.5429	1090.59	91.7484	1091.93	83.3749
	1089.62	139.566	1093.01	131.442	1093.17	128.538	1092.34	122.244	1092.72	106.728	1091.02	97.8066	1091.59	91.6362	1092.93	83.7924
	1090.62	139.655	1094.01	130.659	1094.17	128.399	1093.34	122.297	1093.72	106.077	1092.02	98.5249	1092.59	92.6617	1093.93	83.0609
	1091.62	139.299	1095.01	130.647	1095.17	129.086	1094.34	122.186	1094.72	105.536	1093.02	97.9716	1093.59	92.0278	1094.93	83.6218
	1092.62	138.666	1096.01	131.512	1096.17	128.115	1095.34	122.655	1095.72	105.991	1094.02	98.1437	1094.59	92.7496	1095.93	84.1776
	1093.62	138.922	1097.01	130.847	1097.17	128.669	1096.34	122.965	1096.72	106.085	1095.02	98.6964	1095.59	92.1648	1096.93	83.6678
	1094.62	138.965	1098.01	130.929	1098.17	129.247	1097.34	123.153	1097.72	106.379	1096.02	98.1669	1096.59	91.6172	1097.93	83.8228
	1095.62	139.738	1099.01	130.73	1099.17	129.543	1098.34	122.387	1098.72	106.326	1097.02	97.3902	1097.59	92.0164	1098.93	83.0309
	1096.62	137.979	1100.01	131.208	1100.17	130.021	1099.34	123.638	1099.72	106.153	1098.02	98.0067	1098.59	92.5814	1099.93	83.2694
	1097.62	139.231	1101.01	130.601	1101.17	128.607	1100.34	122.787	1100.72	106.32	1099.02	97.6457	1099.59	92.4383	1100.93	84.0171
	1098.62	139.896	1102.01	131.261	1102.17	128.916	1101.34	123.055	1101.72	106.203	1100.02	98.6481	1100.59	92.8764	1101.93	83.2347
	1099.62	139.612	1103.01	131.194	1103.17	128.987	1102.34	124.358	1102.72	106.819	1101.02	98.2032	1101.59	91.8506	1102.93	83.8578
	1100.62	140.139	1104.01	131.012	1104.17	129.103	1103.34	123.161	1103.72	106.89	1102.02	98.403	1102.59	92.1856	1103.93	83.6231
	1101.62	138.279	1105.01	130.573	1105.17	129.936	1104.34	123.34	1104.72	106.669	1103.02	98.7087	1103.59	92.4321	1104.93	83.3595
	1102.62	140.033	1106.01	130.504	1106.17	128.952	1105.34	121.898	1105.72	106.044	1104.02	99.2065	1104.59	92.8622	1105.93	83.7775
	1103.62	139.513	1107.01	131.901	1107.17	130.126	1106.34	123.309	1106.72	105.859	1105.02	98.1119	1105.59	92.3094	1106.93	83.6658
	1104.62	139.158	1108.01	131.144	1108.17	129.567	1107.34	123.246	1107.72	106.128	1106.02	98.5296	1106.59	93.1605	1107.93	84.2737
	1105.62	140.073	1109.01	131.638	1109.17	128.507	1108.34	123.168	1108.72	107.277	1107.02	98.461	1107.59	92.6571	1108.93	84.0375
	1106.62	139.345	1110.01	131.92	1110.17	128.813	1109.34	123.351	1109.72	106.363	1108.02	97.8573	1108.59	92.9346	1109.93	83.6662
	1107.62	138.825	1111.01	131.134	1111.17	129.281	1110.34	122.6	1110.72	105.39	1109.02	98.3521	1109.59	92.7041	1110.93	83.5847
	1108.62	139.553	1112.01	132.033	1112.17	129.414	1111.34	123.104	1111.72	107.678	1110.02	98.1369	1110.59	92.0458	1111.93	82.8611
	1109.62	140.235	1113.01	132.38	1113.17	128.917	1112.34	123.392	1112.72	106.248	1111.02	98.2879	1111.59	92.1183	1112.93	83.0308
	1110.62	140.969	1114.01	130.539	1114.17	129.719	1113.34	122.918	1113.72	106.635	1112.02	98.9458	1112.59	92.5572	1113.93	83.7864
	1111.62	138.994	1115.01	131.292	1115.17	130.036	1114.34	123.467	1114.72	104.807	1113.02	98.2045	1113.59	92.7727	1114.93	82.7173
	1112.62	140.473	1116.01	132.568	1116.17	129	1115.34	123.78	1115.72	106.527	1114.02	98.3201	1114.59	92.1917	1115.93	83.6548
	1113.62	139.575	1117.01	130.873	1117.17	130.054	1116.34	123.794	1116.72	105.437	1115.02	99.1249	1115.59	91.9419	1116.93	84.0739
	1114.62	139.829	1118.01	130.475	1118.17	128.421	1117.34	124.273	1117.72	106.192	1116.02	98.3712	1116.59	92.8152	1117.93	84.0029
	1115.62	138.772	1119.01	130.822	1119.17	129.692	1118.34	124.269	1118.72	106.569	1117.02	99.1288	1117.59	91.5637	1118.93	83.4617
	1116.62	138.942	1120.01	131.7	1120.17	128.758	1119.34	122.956	1119.72	105.22	1118.02	98.3441	1118.59	92.3307	1119.93	82.7537
	1117.62	140.274	1121.01	131.997	1121.17	129.343	1120.34	124.318	1120.72	106.776	1119.02	98.7819	1119.59	92.9322	1120.93	84.1575
	1118.62	140.214	1122.01	131.354	1122.17	130.024	1121.34	124.129	1121.72	106.471	1120.02	98.6646	1120.59	91.9498	1121.93	82.8048
	1119.62	140.566	1123.01	132.78	1123.17	129.684	1122.34	123.208	1122.72	106.798	1121.02	98.6267	1121.59	93.1389	1122.93	83.2248
	1120.62	139.211	1124.01	131.891	1124.17	128.813	1123.34	123.972	1123.72	105.593	1122.02	98.5482	1122.59	92.6647	1123.93	83.1662
	1121.62	139.149	1125.01	130.912	1125.17	130.112	1124.34	123.312	1124.72	106.197	1123.02	97.4689	1123.59	92.0147	1124.93	82.3158
	1122.62	141.148	1126.01	132.748	1126.17	129.281	1125.34	123.523	1125.72	106.576	1124.02	97.6928	1124.59	92.2657	1125.93	84.1128
	1123.62	141.034	1127.01	131.685	1127.17	129.825	1126.34	123.234	1126.72	107.058	1125.02	98.8142	1125.59	92.5114	1126.93	84.1518
	1124.62	139.557	1128.01	131.471	1128.17	129.975	1127.34	123.774	1127.72	106.019	1126.02	98.4008	1126.59	92.3519	1127.93	83.6226
	1125.62	139.471	1129.01	132.078	1129.17	130.125	1128.34	123.619	1128.72	106.489	1127.02	98.2721	1127.59	91.7398	1128.93	84.251
	1126.62	139.618	1130.01	132.238	1130.17	129.109	1129.34	123.597	1129.72	106.978	1128.02	97.706	1128.59	92.5938	1129.93	83.8531
	1127.62	140.839	1131.01	132.042	1131.17	130.072	1130.34	124.315	1130.72	106.708	1129.02	98.4759	1129.59	92.239	1130.93	83.775
	1128.62	140.524	1132.01	131.496	1132.17	130.864	1131.34	124.537	1131.72	106.822	1130.02	99.1311	1130.59	92.4349	1131.93	83.5749
	1129.62	140.747	1133.01	131.625	1133.17	131.174	1132.34	123.937	1132.72	107.822	1131.02	98.3244	1131.59	92.4019	1132.93	82.9771
	1130.62	140.962	1134.01	132.576	1134.17	130.764	1133.34	124.47	1133.72	107.163	1132.02	97.9089	1132.59	91.8601	1133.93	83.7116
	1131.62	139.741	1135.01	132.534	1135.17	130.06	1134.34	124.827	1134.72	106.958	1133.02	98.6889	1133.59	93.3734	1134.93	83.1538
	1132.62	141	1136.01	132.388	1136.17	130.135	1135.34	124.304	1135.72	107.156	1134.02	97.6508	1134.59	92.1495	1135.93	84.1743
	1133.62	140.841	1137.01	132.226	1137.17	130.56	1136.34	124.956	1136.72	106.273	1135.02	98.3918	1135.59	91.594	1136.93	84.3456
	1134.62	140.002	1138.01	131.415	1138.17	130.268	1137.34	124.859	1137.72	105.934	1136.02	98.841	1136.59	92.2836	1137.93	83.7023
	1135.62	141.002	1139.01	131.914	1139.17	129.986	1138.34	124.814	1138.72	107.623	1137.02	98.2991	1137.59	91.3241	1138.93	84.5706
	1136.62	140.934	1140.01	131.929	1140.17	128.709	1139.34	123.641	1139.72	107.37	1138.02	98.6968	1138.59	92.4913	1139.93	83.9544
	1137.62	140.894	1141.01	132.402	1141.17	129.802	1140.34	124.843	1140.72	105.772	1139.02	99.3596	1139.59	93.2481	1140.93	82.8547
	1138.62	139.388	1142.01	132.201	1142.17	129.94	1141.34	123.694	1141.72	106.384	1140.02	98.7455	1140.59	93.4933	1141.93	83.3229
	1139.62	140.116	1143.01	131.89	1143.17	130.15	1142.34	124.531	1142.72	106.057	1141.02	99.2055	1141.59	92.1894	1142.93	83.7275
	1140.62	140.86	1144.01	132.528	1144.17	130.03	1143.34	124.49	1143.72	107.668	1142.02	98.9893	1142.59	92.385	1143.93	84.1006
	1141.62	140.962	1145.01	131.256	1145.17	130.195	1144.34	125.216	1144.72	106.413	1143.02	99.1945	1143.59	92.0356	1144.93	82.8538
	1142.62	139.796	1146.01	131.253	1146.17	129.528	1145.34	124.309	1145.72	107.197	1144.02	98.085	1144.59	92.4779	1145.93	84.043
	1143.62	140.83	1147.01	131.724	1147.17	129.827	1146.34	124.012	1146.72	107.919	1145.02	99.0595	1145.59	92.7165	1146.93	83.7473
	1144.62	140.663	1148.01	131.294	1148.17	130.106	1147.34	123.675	1147.72	107.513	1146.02	98.6496	1146.59	93.2237	1147.93	83.6917
	1145.62	140.071	1149.01	131.389	1149.17	130.288	1148.34	124.292	1148.72	106.958	1147.02	97.8634	1147.59	92.1531	1148.93	82.7626
	1146.62	140.539	1150.01	133.082	1150.17	130.442	1149.34	124.741	1149.72	106.391	1148.02	98.2691	1148.59	91.466	1149.93	83.1385
	1147.62	140.756	1151.01	132.696	1151.17	130.467	1150.34	124.815	1150.72	106.031	1149.02	99.2471	1149.59	92.885	1150.93	83.543
	1148.62	140.972	1152.01	132.337	1152.17	129.917	1151.34	123.871	1151.72	106.593	1150.02	99.0977	1150.59	91.8315	1151.93	83.9701
	1149.62	141.205	1153.01	131.839	1153.17	131.672	1152.34	124.442	1152.72	106.027	1151.02	98.2919	1151.59	92.9749	1152.93	83.7371
	1150.62	141.052	1154.01	133.423	1154.17	130.699	1153.34	124.533	1153.72	106.664	1152.02	99.3402	1152.59	92.7413	1153.93	84.6369
	1151.62	140.975	1155.01	132.217	1155.17	131.274	1154.34	123.943	1154.72	106.905	1153.02	99.6134	1153.59	93.1567	1154.93	84.6523
	1152.62	139.702	1156.01	132.209	1156.17	131.138	1155.34	124.378	1155.72	105.883	1154.02	98.6072	1154.59	92.8619	1155.93	83.4204
	1153.62	141.14	1157.01	132.906	1157.17	130.141	1156.34	124.774	1156.72	106.431	1155.02	98.9029	1155.59	93.0481	1156.93	83.902
	1154.62	139.776	1158.01	132.191	1158.17	129.476	1157.34	124.464	1157.72	106.596	1156.02	98.6029	1156.59	91.5673	1157.93	83.9369
	1155.62	140.89	1159.01	133.17	1159.17	130.711	1158.34	125.1	1158.72	106.596	1157.02	99.102	1157.59	92.0701	1158.93	83.5489
	1156.62	140.771	1160.01	131.741	1160.17	130.675	1159.34	124.599	1159.72	107.396	1158.02	99.621	1158.59	92.1781	1159.93	83.3234
	1157.62	140.006	1161.01	133.327	1161.17	130.708	1160.34	124.997	1160.72	106.592	1159.02	99.4836	1159.59	91.8284	1160.93	83.2453
	1158.62	141.697	1162.01	132.719	1162.17	130.526	1161.34	125.212	1161.72	107.167	1160.02	98.3111	1160.59	91.8677	1161.93	83.5552
	1159.62	141.725	1163.01	132.618	1163.17	130.53	1162.34	123.523	1162.72	107.062	1161.02	99.1884	1161.59	92.0613	1162.93	83.2512
	1160.62	142.29	1164.01	133.194	1164.17	131.263	1163.34	124.444	1163.72	107.026	1162.02	98.1064	1162.59	92.6541	1163.93	83.1042
	1161.62	142.161	1165.01	133.721	1165.17	130.067	1164.34	125.714	1164.72	106.517	1163.02	99.0736	1163.59	92.2601	1164.93	84.4206
	1162.62	140.724	1166.01	133.526	1166.17	130.717	1165.34	123.428	1165.72	107.825	1164.02	98.2639	1164.59	92.2559	1165.93	83.0663
	1163.62	141.489	1167.01	132.465	1167.17	130.604	1166.34	124.847	1166.72	107.425	1165.02	98.2888	1165.59	92.1414	1166.93	83.2663
	1164.62	141.369	1168.01	132.65	1168.17	129.988	1167.34	124.576	1167.72	107.205	1166.02	98.6462	1166.59	92.4545	1167.93	83.1592
	1165.62	142.088	1169.01	132.112	1169.17	131.162	1168.34	125.111	1168.72	106.582	1167.02	98.6813	1167.59	91.6707	1168.93	84.4799
	1166.62	141.654	1170.01	133.34	1170.17	131.227	1169.34	125.774	1169.72	106.911	1168.02	97.9693	1168.59	92.6679	1169.93	83.9269
	1167.62	141.985	1171.01	134.915	1171.17	130.701	1170.34	124.769	1170.72	106.733	1169.02	99.0449	1169.59	93.6581	1170.93	83.2693
	1168.62	140.57	1172.01	132.657	1172.17	132.28	1171.34	125.103	1171.72	107.329	1170.02	99.5889	1170.59	91.3855	1171.93	83.1337
	1169.62	142.497	1173.01	134.707	1173.17	130.079	1172.34	125.205	1172.72	107.673	1171.02	98.874	1171.59	92.3822	1172.93	83.1671
	1170.62	141.483	1174.01	132.656	1174.17	131.756	1173.34	124.707	1173.72	107.716	1172.02	99.1913	1172.59	93.3876	1173.93	83.1749
	1171.62	141.114	1175.01	134.02	1175.17	131.392	1174.34	125.201	1174.72	107.856	1173.02	98.4546	1173.59	91.9459	1174.93	82.7166
	1172.62	141.918	1176.01	133.437	1176.17	130.774	1175.34	124.19	1175.72	107.354	1174.02	98.9881	1174.59	92.1285	1175.93	83.611
	1173.62	141.004	1177.01	133.736	1177.17	131.831	1176.34	124.727	1176.72	107.607	1175.02	99.7164	1175.59	92.5463	1176.93	83.5809
	1174.62	141.525	1178.01	132.964	1178.17	130.822	1177.34	125.59	1177.72	107.589	1176.02	98.6527	1176.59	92.966	1177.93	84.5178
	1175.62	140.806	1179.01	132.8	1179.17	130.372	1178.34	125.444	1178.72	106.87	1177.02	99.4642	1177.59	92.8151	1178.93	84.6327
	1176.62	142.818	1180.01	134.549	1180.17	131.047	1179.34	125.683	1179.72	108.129	1178.02	98.4028	1178.59	92.0924	1179.93	84.0793
	1177.62	141.769	1181.01	132.255	1181.17	131.465	1180.34	125.978	1180.72	107.203	1179.02	99.4354	1179.59	91.3645	1180.93	83.1957
	1178.62	141.455	1182.01	132.561	1182.17	130.607	1181.34	125.438	1181.72	107.17	1180.02	98.5445	1180.59	92.2851	1181.93	82.9806
	1179.62	141.371	1183.01	132.402	1183.17	130.558	1182.34	124.676	1182.72	107.27	1181.02	99.8479	1181.59	93.6305	1182.93	84.3653
	1180.62	141.267	1184.01	133.377	1184.17	131.374	1183.34	125.338	1183.72	107.584	1182.02	98.6755	1182.59	93.2016	1183.93	83.0356
	1181.62	141.923	1185.01	132.725	1185.17	131.756	1184.34	125.512	1184.72	107.987	1183.02	98.9602	1183.59	92.4487	1184.93	83.8396
	1182.62	142.105	1186.01	132.295	1186.17	132.11	1185.34	124.801	1185.72	107.06	1184.02	98.9874	1184.59	92.6691	1185.93	83.3124
	1183.62	141.914	1187.01	133.47	1187.17	130.782	1186.34	125.217	1186.72	106.321	1185.02	99.0669	1185.59	92.5114	1186.93	83.604
	1184.62	141.25	1188.01	132.926	1188.17	130.924	1187.34	126.052	1187.72	107.484	1186.02	98.9437	1186.59	93.0859	1187.93	82.5068
	1185.62	142.337	1189.01	133.443	1189.17	132.314	1188.34	126.14	1188.72	106.759	1187.02	100.004	1187.59	92.1682	1188.93	83.3563
	1186.62	142.102	1190.01	134.299	1190.17	130.794	1189.34	126.164	1189.72	106.96	1188.02	99.483	1188.59	92.5406	1189.93	82.8766
	1187.62	141.574	1191.01	132.404	1191.17	132.456	1190.34	125.793	1190.72	107.29	1189.02	98.5559	1189.59	91.5975	1190.93	84.1655
	1188.62	141.836	1192.01	132.345	1192.17	130.982	1191.34	124.827	1191.72	106.387	1190.02	97.8597	1190.59	91.6124	1191.93	83.3816
	1189.62	141.55	1193.01	134.301	1193.17	131.253	1192.34	125.937	1192.72	107.405	1191.02	99.1445	1191.59	92.0091	1192.93	83.1652
	1190.62	141.952	1194.01	133.747	1194.17	131.414	1193.34	125.346	1193.72	107.385	1192.02	99.5417	1192.59	92.3681	1193.93	82.782
	1191.62	142.454	1195.01	133.701	1195.17	130.986	1194.34	125.079	1194.72	107.573	1193.02	99.1198	1193.59	92.7647	1194.93	82.9517
	1192.62	142.71	1196.01	132.565	1196.17	131.945	1195.34	125.715	1195.72	107.173	1194.02	99.4149	1194.59	92.5807	1195.93	84.0236
	1193.62	141.708	1197.01	134.516	1197.17	132.019	1196.34	125.979	1196.72	107.79	1195.02	99.3061	1195.59	93.0245	1196.93	83.5777
	1194.62	142.559	1198.01	133.797	1198.17	131.186	1197.34	124.331	1197.72	107.777	1196.02	97.2314	1196.59	92.3636	1197.93	84.1221
	1195.62	142.383	1199.01	134.496	1199.17	131.798	1198.34	124.573	1198.72	107.379	1197.02	99.3954	1197.59	93.191	1198.93	83.8804
	1196.62	142.129	1200.01	133.633	1200.17	131.106	1199.34	124.788	1199.72	107.721	1198.02	98.9169	1198.59	93.019	1199.93	84.158
	1197.62	143.752					1200.34	125.513	1200.72	107.318	1199.02	99.8811	1199.59	91.8391	1200.93	83.7421
	1198.62	143.347									1200.02	100.371	1200.59	93.7692
	1199.62	142.524
	1200.62	142.895
	3rd BCD Titration Control		3rd BCD Titration 2nM		3rd BCD Titration 5nM		3rd BCD Titration 10nM		3rd BCD Titration 20nM		3rd BCD Titration 50nM		3rd BCD Titration 100nM		3rd BCD Titration 500nM
	3rd BCD Titration Control		3rd BCD Titration 2nM		3rd BCD Titration 5nM		3rd BCD Titration 10nM		3rd BCD Titration 20nM		3rd BCD Titration 50nM		3rd BCD Titration 100nM		3rd BCD Titration 500nM
	Collection Time: 03/03/2020 11:32:58		Collection Time: 03/03/2020 12:19:33		Collection Time: 03/03/2020 13:15:22		Collection Time: 03/03/2020 12:42:48		Collection Time: 03/03/2020 13:40:59		Collection Time: 03/03/2020 14:03:08		Collection Time: 03/03/2020 14:39:27		Collection Time: 03/03/2020 15:06:45
	Operator Name :		Operator Name :		Operator Name :		Operator Name :		Operator Name :		Operator Name :		Operator Name :		Operator Name :
	Kinetics Software Version: 1.1(133)		Kinetics Software Version: 1.1(133)		Kinetics Software Version: 1.1(133)		Kinetics Software Version: 1.1(133)		Kinetics Software Version: 1.1(133)		Kinetics Software Version: 1.1(133)		Kinetics Software Version: 1.1(133)		Kinetics Software Version: 1.1(133)
	Parameter List :		Parameter List :		Parameter List :		Parameter List :		Parameter List :		Parameter List :		Parameter List :		Parameter List :
	Report Time: Tue 03 Mar 11:32:57 AM 2020		Report Time: Tue 03 Mar 12:19:33 PM 2020		Report Time: Tue 03 Mar 01:15:22 PM 2020		Report Time: Tue 03 Mar 12:42:48 PM 2020		Report Time: Tue 03 Mar 01:40:59 PM 2020		Report Time: Tue 03 Mar 02:03:08 PM 2020		Report Time: Tue 03 Mar 02:39:27 PM 2020		Report Time: Tue 03 Mar 03:06:45 PM 2020
	Software version: 1.1(133)		Software version: 1.1(133)		Software version: 1.1(133)		Software version: 1.1(133)		Software version: 1.1(133)		Software version: 1.1(133)		Software version: 1.1(133)		Software version: 1.1(133)
	Operator:		Operator:		Operator:		Operator:		Operator:		Operator:		Operator:		Operator:
	Instrument Parameters		Instrument Parameters		Instrument Parameters		Instrument Parameters		Instrument Parameters		Instrument Parameters		Instrument Parameters		Instrument Parameters
	Instrument Cary Eclipse		Instrument Cary Eclipse		Instrument Cary Eclipse		Instrument Cary Eclipse		Instrument Cary Eclipse		Instrument Cary Eclipse		Instrument Cary Eclipse		Instrument Cary Eclipse
	Instrument Serial Number EL07063152		Instrument Serial Number EL07063152		Instrument Serial Number EL07063152		Instrument Serial Number EL07063152		Instrument Serial Number EL07063152		Instrument Serial Number EL07063152		Instrument Serial Number EL07063152		Instrument Serial Number EL07063152
	Data mode Fluorescence		Data mode Fluorescence		Data mode Fluorescence		Data mode Fluorescence		Data mode Fluorescence		Data mode Fluorescence		Data mode Fluorescence		Data mode Fluorescence
	Ex. wavelength (nm) 430.00		Ex. wavelength (nm) 430.00		Ex. wavelength (nm) 430.00		Ex. wavelength (nm) 430.00		Ex. wavelength (nm) 430.00		Ex. wavelength (nm) 430.00		Ex. wavelength (nm) 430.00		Ex. wavelength (nm) 430.00
	Em. wavelength (nm) 475.00		Em. wavelength (nm) 475.00		Em. wavelength (nm) 475.00		Em. wavelength (nm) 475.00		Em. wavelength (nm) 475.00		Em. wavelength (nm) 475.00		Em. wavelength (nm) 475.00		Em. wavelength (nm) 475.00
	Ex. Slit (nm) 10		Ex. Slit (nm) 10		Ex. Slit (nm) 10		Ex. Slit (nm) 10		Ex. Slit (nm) 10		Ex. Slit (nm) 10		Ex. Slit (nm) 10		Ex. Slit (nm) 10
	Em. Slit (nm) 5		Em. Slit (nm) 5		Em. Slit (nm) 5		Em. Slit (nm) 5		Em. Slit (nm) 5		Em. Slit (nm) 5		Em. Slit (nm) 5		Em. Slit (nm) 5
	Averaging Time (s) 1.0000		Averaging Time (s) 1.0000		Averaging Time (s) 1.0000		Averaging Time (s) 1.0000		Averaging Time (s) 1.0000		Averaging Time (s) 1.0000		Averaging Time (s) 1.0000		Averaging Time (s) 1.0000
	Cycle time(s) 0.0000		Cycle time(s) 0.0000		Cycle time(s) 0.0000		Cycle time(s) 0.0000		Cycle time(s) 0.0000		Cycle time(s) 0.0000		Cycle time(s) 0.0000		Cycle time(s) 0.0000
	Stop time(s) 1200.0000		Stop time(s) 1200.0000		Stop time(s) 1200.0000		Stop time(s) 1200.0000		Stop time(s) 1200.0000		Stop time(s) 1200.0000		Stop time(s) 1200.0000		Stop time(s) 1200.0000
	Emission filter Open		Emission filter Open		Emission filter Open		Emission filter Open		Emission filter Open		Emission filter Open		Emission filter Open		Emission filter Open
	Excitation Filter Auto		Excitation Filter Auto		Excitation Filter Auto		Excitation Filter Auto		Excitation Filter Auto		Excitation Filter Auto		Excitation Filter Auto		Excitation Filter Auto
	PMT voltage (V) High		PMT voltage (V) High		PMT voltage (V) High		PMT voltage (V) High		PMT voltage (V) High		PMT voltage (V) High		PMT voltage (V) High		PMT voltage (V) High
	Comments:		Comments:		Comments:		Comments:		Comments:		Comments:		Comments:		Comments:
	Method Log :		Method Log :		Method Log :		Method Log :		Method Log :		Method Log :		Method Log :		Method Log :
	Method Name : C:\Documents and Settings\eclipse\My Documents\Eclipse_Users\Emma&Emma\AddAB Reaction Improved.FMKN		Method Name : C:\Documents and Settings\eclipse\My Documents\Eclipse_Users\Emma&Emma\AddAB Reaction Improved.FMKN		Method Name : C:\Documents and Settings\eclipse\My Documents\Eclipse_Users\Emma&Emma\AddAB Reaction Improved.FMKN		Method Name : C:\Documents and Settings\eclipse\My Documents\Eclipse_Users\Emma&Emma\AddAB Reaction Improved.FMKN		Method Name : C:\Documents and Settings\eclipse\My Documents\Eclipse_Users\Emma&Emma\AddAB Reaction Improved.FMKN		Method Name : C:\Documents and Settings\eclipse\My Documents\Eclipse_Users\Emma&Emma\AddAB Reaction Improved.FMKN		Method Name : C:\Documents and Settings\eclipse\My Documents\Eclipse_Users\Emma&Emma\AddAB Reaction Improved.FMKN		Method Name : C:\Documents and Settings\eclipse\My Documents\Eclipse_Users\Emma&Emma\AddAB Reaction Improved.FMKN
	Date/Time stamp: 26/02/2020 12:10:23		Date/Time stamp: 26/02/2020 12:10:23		Date/Time stamp: 26/02/2020 12:10:23		Date/Time stamp: 26/02/2020 12:10:23		Date/Time stamp: 26/02/2020 12:10:23		Date/Time stamp: 26/02/2020 12:10:23		Date/Time stamp: 26/02/2020 12:10:23		Date/Time stamp: 26/02/2020 12:10:23
	Method Modifications:		Method Modifications:		Method Modifications:		Method Modifications:		Method Modifications:		Method Modifications:		Method Modifications:		Method Modifications:
	Excitation Wavelength Changed: 21/02/2020 15:10:08	Old: 400.00	Excitation Wavelength Changed: 21/02/2020 15:10:08	Old: 400.00	Excitation Wavelength Changed: 21/02/2020 15:10:08	Old: 400.00	Excitation Wavelength Changed: 21/02/2020 15:10:08	Old: 400.00	Excitation Wavelength Changed: 21/02/2020 15:10:08	Old: 400.00	Excitation Wavelength Changed: 21/02/2020 15:10:08	Old: 400.00	Excitation Wavelength Changed: 21/02/2020 15:10:08	Old: 400.00	Excitation Wavelength Changed: 21/02/2020 15:10:08	Old: 400.00
	Emission Wavelength Changed: 21/02/2020 15:10:08	Old: 600.00	Emission Wavelength Changed: 21/02/2020 15:10:08	Old: 600.00	Emission Wavelength Changed: 21/02/2020 15:10:08	Old: 600.00	Emission Wavelength Changed: 21/02/2020 15:10:08	Old: 600.00	Emission Wavelength Changed: 21/02/2020 15:10:08	Old: 600.00	Emission Wavelength Changed: 21/02/2020 15:10:08	Old: 600.00	Emission Wavelength Changed: 21/02/2020 15:10:08	Old: 600.00	Emission Wavelength Changed: 21/02/2020 15:10:08	Old: 600.00
	Ex. Slit Width (nm): Changed: 21/02/2020 15:10:08	Old:5	Ex. Slit Width (nm): Changed: 21/02/2020 15:10:08	Old:5	Ex. Slit Width (nm): Changed: 21/02/2020 15:10:08	Old:5	Ex. Slit Width (nm): Changed: 21/02/2020 15:10:08	Old:5	Ex. Slit Width (nm): Changed: 21/02/2020 15:10:08	Old:5	Ex. Slit Width (nm): Changed: 21/02/2020 15:10:08	Old:5	Ex. Slit Width (nm): Changed: 21/02/2020 15:10:08	Old:5	Ex. Slit Width (nm): Changed: 21/02/2020 15:10:08	Old:5
	X mode Changed: 21/02/2020 15:10:08	Old:min	X mode Changed: 21/02/2020 15:10:08	Old:min	X mode Changed: 21/02/2020 15:10:08	Old:min	X mode Changed: 21/02/2020 15:10:08	Old:min	X mode Changed: 21/02/2020 15:10:08	Old:min	X mode Changed: 21/02/2020 15:10:08	Old:min	X mode Changed: 21/02/2020 15:10:08	Old:min	X mode Changed: 21/02/2020 15:10:08	Old:min
	Ave. time (s): Changed: 21/02/2020 15:10:08	Old:0.10000	Ave. time (s): Changed: 21/02/2020 15:10:08	Old:0.10000	Ave. time (s): Changed: 21/02/2020 15:10:08	Old:0.10000	Ave. time (s): Changed: 21/02/2020 15:10:08	Old:0.10000	Ave. time (s): Changed: 21/02/2020 15:10:08	Old:0.10000	Ave. time (s): Changed: 21/02/2020 15:10:08	Old:0.10000	Ave. time (s): Changed: 21/02/2020 15:10:08	Old:0.10000	Ave. time (s): Changed: 21/02/2020 15:10:08	Old:0.10000
	Stop Time 1 Changed: 21/02/2020 15:10:08	Old: 1.0000	Stop Time 1 Changed: 21/02/2020 15:10:08	Old: 1.0000	Stop Time 1 Changed: 21/02/2020 15:10:08	Old: 1.0000	Stop Time 1 Changed: 21/02/2020 15:10:08	Old: 1.0000	Stop Time 1 Changed: 21/02/2020 15:10:08	Old: 1.0000	Stop Time 1 Changed: 21/02/2020 15:10:08	Old: 1.0000	Stop Time 1 Changed: 21/02/2020 15:10:08	Old: 1.0000	Stop Time 1 Changed: 21/02/2020 15:10:08	Old: 1.0000
	PMT Volts Changed: 21/02/2020 15:10:26	Old:600	PMT Volts Changed: 21/02/2020 15:10:26	Old:600	PMT Volts Changed: 21/02/2020 15:10:26	Old:600	PMT Volts Changed: 21/02/2020 15:10:26	Old:600	PMT Volts Changed: 21/02/2020 15:10:26	Old:600	PMT Volts Changed: 21/02/2020 15:10:26	Old:600	PMT Volts Changed: 21/02/2020 15:10:26	Old:600	PMT Volts Changed: 21/02/2020 15:10:26	Old:600
	Emission PMT (V): Changed: 21/02/2020 15:10:26	Old: 600	Emission PMT (V): Changed: 21/02/2020 15:10:26	Old: 600	Emission PMT (V): Changed: 21/02/2020 15:10:26	Old: 600	Emission PMT (V): Changed: 21/02/2020 15:10:26	Old: 600	Emission PMT (V): Changed: 21/02/2020 15:10:26	Old: 600	Emission PMT (V): Changed: 21/02/2020 15:10:26	Old: 600	Emission PMT (V): Changed: 21/02/2020 15:10:26	Old: 600	Emission PMT (V): Changed: 21/02/2020 15:10:26	Old: 600
	Stop Time 1 Changed: 25/02/2020 14:47:32	Old:600.0000	Stop Time 1 Changed: 25/02/2020 14:47:32	Old:600.0000	Stop Time 1 Changed: 25/02/2020 14:47:32	Old:600.0000	Stop Time 1 Changed: 25/02/2020 14:47:32	Old:600.0000	Stop Time 1 Changed: 25/02/2020 14:47:32	Old:600.0000	Stop Time 1 Changed: 25/02/2020 14:47:32	Old:600.0000	Stop Time 1 Changed: 25/02/2020 14:47:32	Old:600.0000	Stop Time 1 Changed: 25/02/2020 14:47:32	Old:600.0000
	Stop Time 1 Changed: 26/02/2020 11:49:31	Old:900.0000	Stop Time 1 Changed: 26/02/2020 11:49:31	Old:900.0000	Stop Time 1 Changed: 26/02/2020 11:49:31	Old:900.0000	Stop Time 1 Changed: 26/02/2020 11:49:31	Old:900.0000	Stop Time 1 Changed: 26/02/2020 11:49:31	Old:900.0000	Stop Time 1 Changed: 26/02/2020 11:49:31	Old:900.0000	Stop Time 1 Changed: 26/02/2020 11:49:31	Old:900.0000	Stop Time 1 Changed: 26/02/2020 11:49:31	Old:900.0000
	End Method Modifications		End Method Modifications		End Method Modifications		End Method Modifications		End Method Modifications		End Method Modifications		End Method Modifications		End Method Modifications

## Sheet: Repeat 3
his-gp5.9:	Control		2nM		5nM		10nM		20nM		50nM		100nM		500nM
	Time (s)	Fluoro	Time (s)	Fluoro	Time (s)	Fluoro	Time (s)	Fluoro	Time (s)	Fluoro	Time (s)	Fluoro	Time (s)	Fluoro	Time (s)	Fluoro
	0.5	91.8117	0.5	89.6886	0.5	87.8169	0.5	80.0532	0.5	78.8382	0.5	79.9793	0.5	78.3504	0.5	79.9961
	1.5	92.1542	1.5	90.7308	1.5	88.9843	1.5	79.7924	1.5	80.0905	1.5	80.4479	1.5	79.3832	1.5	81.4323
	2.5	93.3284	2.5	91.1054	2.5	88.2136	2.5	78.9976	2.5	79.1671	2.5	80.1706	2.5	79.4944	2.5	80.3574
	3.5	92.8488	3.5	91.9176	3.5	88.4989	3.5	79.5225	3.5	80.8117	3.5	81.0191	3.5	79.2884	3.5	80.8176
	4.5	93.6003	4.5	90.3456	4.5	88.9177	4.5	79.585	4.5	79.5557	4.5	81.4124	4.5	78.9798	4.5	80.9889
	5.5	92.7149	5.5	90.595	5.5	88.1707	5.5	79.4903	5.5	79.6899	5.5	80.6097	5.5	78.7043	5.5	80.1947
	6.5	93.3255	6.5	91.092	6.5	87.895	6.5	78.8322	6.5	79.1331	6.5	80.7722	6.5	79.7103	6.5	81.2959
	7.5	92.8558	7.5	90.8146	7.5	87.4852	7.5	79.6047	7.5	79.5054	7.5	81.4877	7.5	79.5651	7.5	80.8831
	8.5	92.5558	8.5	90.6881	8.5	88.6094	8.5	79.1196	8.5	79.735	8.5	81.5186	8.5	79.1679	8.5	80.6811
	9.5	92.3415	9.5	90.0025	9.5	89.1002	9.5	78.6938	9.5	80.0722	9.5	81.2691	9.5	79.6218	9.5	80.8161
	10.5	93.3629	10.5	90.5457	10.5	88.2334	10.5	78.9511	10.5	79.5404	10.5	80.4245	10.5	80.7304	10.5	80.9623
	11.5	93.2941	11.5	90.9423	11.5	88.1739	11.5	79.8997	11.5	79.3803	11.5	81.2049	11.5	78.7507	11.5	80.6313
	12.5	92.8444	12.5	89.6295	12.5	88.4142	12.5	80.3275	12.5	79.9763	12.5	80.843	12.5	80.2055	12.5	80.8812
	13.5	93.388	13.5	89.3259	13.5	87.3133	13.5	79.436	13.5	80.0745	13.5	81.0188	13.5	79.3163	13.5	80.3649
	14.5	93.0996	14.5	90.7839	14.5	87.6211	14.5	79.7922	14.5	79.6842	14.5	81.4131	14.5	79.8589	14.5	80.5678
	15.5	93.4822	15.5	90.4211	15.5	87.2453	15.5	79.7726	15.5	79.9794	15.5	80.9873	15.5	79.6486	15.5	80.8468
	16.5	93.8412	16.5	89.5099	16.5	88.3059	16.5	78.1146	16.5	78.9826	16.5	80.4774	16.5	79.757	16.5	81.8448
	17.5	92.9796	17.5	90.4396	17.5	87.5986	17.5	79.669	17.5	79.6868	17.5	81.1271	17.5	79.5153	17.5	81.6019
	18.5	93.4486	18.5	89.8902	18.5	87.5638	18.5	78.3109	18.5	79.5446	18.5	80.8689	18.5	79.4675	18.5	80.3433
	19.5	93.5718	19.5	90.154	19.5	87.4273	19.5	78.6845	19.5	79.6966	19.5	80.8578	19.5	79.1978	19.5	81.2158
	20.5	92.89	20.5	90.5679	20.5	86.9578	20.5	78.312	20.5	79.3371	20.5	81.1656	20.5	78.8115	20.5	80.6517
	21.5	93.4741	21.5	90.1479	21.5	87.1351	21.5	78.6946	21.5	79.0582	21.5	79.9013	21.5	78.9943	21.5	81.5596
	22.5	93.0581	22.5	89.4857	22.5	87.1306	22.5	78.7181	22.5	80.5169	22.5	80.683	22.5	79.8554	22.5	80.8201
	23.5	93.6167	23.5	89.9033	23.5	87.4591	23.5	78.8925	23.5	80.9249	23.5	80.2479	23.5	80.2602	23.5	81.0542
	24.5	92.604	24.5	88.8752	24.5	87.7504	24.5	79.2919	24.5	79.2237	24.5	80.7629	24.5	78.375	24.5	81.3283
	25.5	92.5466	25.5	89.7279	25.5	87.6623	25.5	79.9977	25.5	80.0155	25.5	80.3244	25.5	78.9198	25.5	82.523
	26.5	93.8587	26.5	90.8134	26.5	87.1872	26.5	79.7092	26.5	79.636	26.5	80.4791	26.5	79.5405	26.5	80.2513
	27.5	93.4169	27.5	90.1516	27.5	87.8799	27.5	79.1985	27.5	79.3645	27.5	81.2073	27.5	79.9112	27.5	80.3582
	28.5	92.5017	28.5	89.718	28.5	87.7764	28.5	78.3958	28.5	79.7612	28.5	80.2133	28.5	79.6828	28.5	80.3574
	29.5	93.3718	29.5	91.2499	29.5	87.3918	29.5	78.6994	29.5	79.5754	29.5	80.9312	29.5	80.293	29.5	81.0552
	30.5	92.6278	30.5	89.4635	30.5	86.7779	30.5	79.0703	30.5	80.0042	30.5	80.9925	30.5	79.1603	30.5	79.9158
	31.5	91.7816	31.5	89.0942	31.5	86.8733	31.5	78.9227	31.5	80.1145	31.5	80.5535	31.5	78.918	31.5	80.3359
	32.5	92.3362	32.5	89.3713	32.5	87.5726	32.5	78.8989	32.5	79.7893	32.5	80.8007	32.5	79.7151	32.5	80.5692
	33.5	92.8181	33.5	90.2632	33.5	87.9664	33.5	79.2351	33.5	80.1024	33.5	80.5655	33.5	78.783	33.5	80.6602
	34.5	93.5008	34.5	90.4728	34.5	87.5301	34.5	78.5788	34.5	80.0592	34.5	79.8395	34.5	78.708	34.5	79.9351
	35.5	92.5242	35.5	89.528	35.5	87.5167	35.5	78.8474	35.5	79.9245	35.5	80.628	35.5	79.6198	35.5	79.9885
	36.5	93.1267	36.5	89.8584	36.5	86.7393	36.5	78.282	36.5	79.3408	36.5	80.3267	36.5	79.2944	36.5	81.2866
	37.5	93.2694	37.5	90.6057	37.5	86.94	37.5	78	37.5	79.5541	37.5	80.6218	37.5	78.6121	37.5	81.5532
	38.5	92.4082	38.5	89.5071	38.5	86.6351	38.5	78.0191	38.5	79.9483	38.5	81.0159	38.5	79.4598	38.5	81.4913
	39.5	92.8642	39.5	90.8404	39.5	86.4571	39.5	78.379	39.5	79.731	39.5	81.8529	39.5	79.4847	39.5	80.0769
	40.5	92.7843	40.5	89.757	40.5	87.0654	40.5	78.6728	40.5	80.3769	40.5	79.6361	40.5	79.7671	40.5	80.5732
	41.5	93.5618	41.5	90.5126	41.5	87.717	41.5	78.9444	41.5	80.0575	41.5	80.9222	41.5	80.3089	41.5	80.3899
	42.5	92.6532	42.5	89.984	42.5	87.5032	42.5	78.648	42.5	79.3808	42.5	80.859	42.5	80.3953	42.5	80.6591
	43.5	92.8792	43.5	89.7006	43.5	87.2006	43.5	79.2887	43.5	79.7294	43.5	81.0778	43.5	79.5774	43.5	81.6105
	44.5	92.9075	44.5	89.8414	44.5	87.3491	44.5	78.5401	44.5	79.8545	44.5	80.3803	44.5	80.2638	44.5	80.9265
	45.5	91.7271	45.5	89.8691	45.5	87.505	45.5	79.1632	45.5	79.7284	45.5	80.3507	45.5	79.5405	45.5	80.9398
	46.5	92.5495	46.5	89.4997	46.5	87.0789	46.5	79.7469	46.5	79.9391	46.5	81.1222	46.5	79.9841	46.5	80.6959
	47.5	92.4372	47.5	89.3719	47.5	87.1716	47.5	78.7952	47.5	79.755	47.5	80.8684	47.5	79.0564	47.5	80.049
	48.5	93.2106	48.5	90.1365	48.5	87.7449	48.5	78.9849	48.5	79.4676	48.5	79.7686	48.5	78.5175	48.5	80.5719
	49.5	92.2173	49.5	90.0167	49.5	86.9707	49.5	78.357	49.5	80.3879	49.5	80.7437	49.5	78.8006	49.5	80.6222
	50.5	92.6484	50.5	90.2224	50.5	88.252	50.5	78.8279	50.5	79.7035	50.5	80.984	50.5	78.1013	50.5	81.247
	51.5	92.6102	51.5	89.8334	51.5	87.6164	51.5	78.6968	51.5	79.28	51.5	80.7422	51.5	79.1112	51.5	80.3481
	52.5	92.2877	52.5	90.3803	52.5	88.1121	52.5	79.2184	52.5	79.5306	52.5	80.2327	52.5	79.0014	52.5	81.0608
	53.5	92.0433	53.5	90.3671	53.5	86.9079	53.5	79.576	53.5	79.9892	53.5	80.2202	53.5	79.8552	53.5	80.7152
	54.5	93.1108	54.5	89.8888	54.5	87.5399	54.5	78.6532	54.5	80.3299	54.5	82.0509	54.5	79.7088	54.5	80.4024
	55.5	93.2654	55.5	90.1403	55.5	87.4449	55.5	79.307	55.5	79.4473	55.5	80.1707	55.5	79.3871	55.5	80.9378
	56.5	92.6199	56.5	90.8621	56.5	87.3961	56.5	78.9121	56.5	79.5952	56.5	81.4188	56.5	78.7821	56.5	80.2121
	57.5	93.0349	57.5	91.366	57.5	87.4281	57.5	78.5701	57.5	80.1199	57.5	81.0768	57.5	79.5321	57.5	80.9885
	58.5	93.1052	58.5	89.0363	58.5	87.1892	58.5	78.9488	58.5	79.1847	58.5	80.3777	58.5	79.227	58.5	79.866
	59.5	93.4495	59.5	90.2871	59.5	86.4315	59.5	79.4016	59.5	79.9645	59.5	79.5721	59.5	79.9488	59.5	79.8867
	60.5	92.5753	60.5	91.4259	60.5	86.5346	60.5	78.9943	60.5	79.513	60.5	79.9029	60.5	79.2466	60.5	81.2705
	61.5	92.7707	61.5	89.6782	61.5	87.3978	61.5	79.0264	61.5	80.0195	61.5	80.3042	61.5	78.907	61.5	81.0193
	62.5	92.8508	62.5	90.0789	62.5	86.878	62.5	78.4478	62.5	80.3291	62.5	80.8792	62.5	79.6946	62.5	80.4847
	63.5	93.6061	63.5	90.0848	63.5	87.0451	63.5	79.1392	63.5	79.5793	63.5	80.9225	63.5	79.4695	63.5	79.9964
	64.5	92.6183	64.5	90.9095	64.5	86.9108	64.5	77.7536	64.5	79.6256	64.5	81.2965	64.5	79.7094	64.5	80.0126
	65.5	93.1012	65.5	89.9372	65.5	86.5048	65.5	78.0603	65.5	79.0706	65.5	81.0816	65.5	78.529	65.5	80.3863
	66.5	92.2342	66.5	90.4823	66.5	86.8709	66.5	79.6116	66.5	79.4016	66.5	81.2947	66.5	79.4476	66.5	80.9479
	67.5	93.7963	67.5	90.0053	67.5	87.0677	67.5	78.3978	67.5	80.3617	67.5	79.9385	67.5	79.0378	67.5	80.609
	68.5	92.5727	68.5	89.5413	68.5	87.4785	68.5	78.5267	68.5	79.6506	68.5	79.9961	68.5	78.9642	68.5	81.1626
	69.5	92.6317	69.5	90.9931	69.5	88.3608	69.5	78.6196	69.5	78.9411	69.5	80.7291	69.5	79.1266	69.5	80.0461
	70.5	93.3466	70.5	90.198	70.5	88.6952	70.5	78.9206	70.5	78.6965	70.5	80.1459	70.5	79.1369	70.5	80.9584
	71.5	93.1901	71.5	89.5336	71.5	87.3884	71.5	78.4978	71.5	79.2706	71.5	81.842	71.5	79.5522	71.5	80.8591
	72.5	93.5723	72.5	90.1408	72.5	88.2343	72.5	78.8925	72.5	79.4898	72.5	80.3184	72.5	80.0439	72.5	80.1061
	73.5	93.9489	73.5	91.5391	73.5	87.5327	73.5	78.5858	73.5	78.7202	73.5	80.8575	73.5	79.2921	73.5	80.2367
	74.5	92.8351	74.5	90.9789	74.5	87.813	74.5	79.2702	74.5	79.7239	74.5	81.1423	74.5	79.6197	74.5	81.0166
	75.5	92.6773	75.5	89.9077	75.5	86.9845	75.5	77.5826	75.5	79.2111	75.5	80.118	75.5	78.7487	75.5	80.5833
	76.5	93.9421	76.5	89.5364	76.5	86.8908	76.5	79.1754	76.5	79.7365	76.5	80.6528	76.5	79.187	76.5	80.3435
	77.5	93.1664	77.5	89.7787	77.5	86.3203	77.5	78.0844	77.5	79.4641	77.5	80.6181	77.5	78.5705	77.5	80.1692
	78.5	92.9853	78.5	90.8086	78.5	87.3166	78.5	78.5779	78.5	79.0886	78.5	80.1793	78.5	78.8342	78.5	80.7654
	79.5	92.7383	79.5	90.3792	79.5	87.4969	79.5	78.4011	79.5	78.7791	79.5	80.5635	79.5	79.718	79.5	80.7282
	80.5	93.2938	80.5	89.7689	80.5	87.8621	80.5	78.187	80.5	78.7487	80.5	80.9064	80.5	78.5966	80.5	80.7891
	81.5	93.3316	81.5	90.5955	81.5	88.0615	81.5	78.6175	81.5	79.8466	81.5	80.2412	81.5	79.7701	81.5	80.8168
	82.5	92.3777	82.5	89.7782	82.5	87.2159	82.5	79.087	82.5	80.3961	82.5	80.1032	82.5	79.6724	82.5	80.2345
	83.5	93.1799	83.5	91.0694	83.5	87.5281	83.5	79.0184	83.5	79.5047	83.5	80.6459	83.5	78.8493	83.5	80.5111
	84.5	93.3793	84.5	90.2559	84.5	87.4243	84.5	78.7002	84.5	79.857	84.5	81.045	84.5	78.9468	84.5	81.5341
	85.5	94.4839	85.5	89.9315	85.5	87.3142	85.5	79.552	85.5	79.1713	85.5	81.187	85.5	80.2837	85.5	79.9158
	86.5	93.5275	86.5	89.6976	86.5	87.6923	86.5	79.1746	86.5	78.4023	86.5	80.2524	86.5	78.645	86.5	80.9448
	87.5	93.1659	87.5	89.5749	87.5	87.5258	87.5	78.8053	87.5	79.4936	87.5	81.3385	87.5	78.9244	87.5	80.3118
	88.5	93.0466	88.5	89.4317	88.5	86.5956	88.5	79.219	88.5	78.8404	88.5	80.8292	88.5	78.5197	88.5	81.1281
	89.5	93.8869	89.5	90.3404	89.5	88.3367	89.5	79.6947	89.5	79.7178	89.5	80.0394	89.5	79.0851	89.5	80.6426
	90.5	92.7856	90.5	89.9665	90.5	87.7499	90.5	79.302	90.5	80.0504	90.5	80.4672	90.5	78.2384	90.5	80.6287
	91.5	93.5284	91.5	90.5719	91.5	87.6071	91.5	79.3832	91.5	79.7617	91.5	80.2851	91.5	79.4185	91.5	80.2598
	92.5	92.9624	92.5	90.1197	92.5	87.04	92.5	79.0642	92.5	79.3205	92.5	80.4747	92.5	78.7605	92.5	81.1907
	93.5	94.3925	93.5	89.7242	93.5	87.0319	93.5	78.6836	93.5	79.2857	93.5	81.0641	93.5	79.4317	93.5	81.1636
	94.5	93.7893	94.5	89.7034	94.5	86.3804	94.5	79.1388	94.5	79.8203	94.5	80.3021	94.5	79.2981	94.5	80.2474
	95.5	93.3059	95.5	90.7651	95.5	87.7539	95.5	78.6562	95.5	79.7859	95.5	79.9777	95.5	78.9693	95.5	80.3389
	96.5	93.5302	96.5	89.9339	96.5	87.0411	96.5	79.6895	96.5	79.9027	96.5	80.2116	96.5	78.6696	96.5	80.9825
	97.5	92.7653	97.5	90.684	97.5	86.8584	97.5	78.0151	97.5	80.3159	97.5	81.2491	97.5	78.5485	97.5	81.0974
	98.5	93.4051	98.5	90.2778	98.5	86.7347	98.5	78.7982	98.5	79.8343	98.5	80.4337	98.5	79.6691	98.5	80.953
	99.5	93.0189	99.5	90.0091	99.5	87.6988	99.5	79.4277	99.5	79.8868	99.5	81.2057	99.5	79.0705	99.5	80.3897
	100.5	93.6674	100.5	89.5157	100.5	87.1504	100.5	78.9267	100.5	79.1734	100.5	79.6994	100.5	78.9527	100.5	80.9114
	101.5	93.2497	101.5	90.5259	101.5	87.179	101.5	78.0977	101.5	79.6081	101.5	80.9103	101.5	77.7786	121.621	82.0901
	102.5	92.8137	102.5	89.6006	102.5	87.7687	102.5	78.814	102.5	79.8799	102.5	79.9992	102.5	79.5943	122.621	83.4933
	103.5	93.791	103.5	89.9025	103.5	86.1482	103.5	79.5505	103.5	79.0701	103.5	79.992	103.5	79.3193	123.621	82.6524
	104.5	93.2196	104.5	91.2629	104.5	86.6856	104.5	78.3968	104.5	80.0126	104.5	80.7343	104.5	78.6066	124.621	83.3736
	105.5	93.6701	105.5	89.8512	105.5	86.7215	105.5	79.196	105.5	79.2873	105.5	80.3059	105.5	79.7773	125.621	83.2327
	106.5	93.6969	106.5	89.8056	106.5	88.0793	106.5	78.9272	106.5	79.4467	106.5	79.7959	106.5	79.7221	126.621	83.6258
	107.5	92.8602	107.5	90.1791	107.5	87.8141	107.5	79.7702	107.5	80.0689	107.5	80.4447	107.5	79.1912	127.621	83.0609
	108.5	93.1215	108.5	89.9668	108.5	88.2702	108.5	79.7177	108.5	78.8255	108.5	80.4902	108.5	78.9224	128.621	84.5303
	109.5	93.4091	109.5	90.3119	109.5	87.2292	109.5	79.3158	109.5	80.2007	109.5	79.7397	109.5	79.4227	129.621	84.0072
	110.5	94.1023	110.5	90.1007	110.5	87.0194	110.5	79.8946	110.5	80.4328	110.5	80.9871	110.5	79.4085	130.621	84.1623
	111.5	93.9338	111.5	90.0514	111.5	88.1203	111.5	79.3604	111.5	79.0379	111.5	80.588	111.5	79.0125	131.621	83.1099
	112.5	93.483	112.5	89.5825	112.5	87.6187	112.5	79.6694	112.5	79.9027	112.5	79.9834	112.5	78.7022	132.621	83.6077
	113.5	94.8206	113.5	90.6315	113.5	88.0219	113.5	78.9491	113.5	79.9522	113.5	80.6046	113.5	78.8737	133.621	82.8375
	114.5	94.2728	114.5	91.044	114.5	86.9138	114.5	79.4238	114.5	79.5692	114.5	80.3356	114.5	78.4557	134.621	83.719
	115.5	93.1157	115.5	91.1531	115.5	87.0858	115.5	79.1295	115.5	79.4603	115.5	81.7234	115.5	79.3606	135.621	84.0522
	116.5	92.181	116.5	90.0479	116.5	87.7717	116.5	79.9352	116.5	79.7986	116.5	80.5525	116.5	79.1176	136.621	83.5202
	117.5	93.8569	117.5	90.5989	117.5	86.0115	117.5	79.0175	117.5	79.8773	117.5	80.4347	117.5	78.7604	137.621	83.8016
	118.5	92.9578	118.5	89.1955	118.5	87.5198	118.5	79.5243	118.5	79.4372	118.5	80.9466	118.5	79.3574	138.621	83.8153
	119.5	94.0313	119.5	89.9457	119.5	87.2877	119.5	79.4295	138.205	80.9731	119.5	80.2209	119.5	79.3742	139.621	84.0503
	120.5	94.7575	120.5	90.087	120.5	87.7871	120.5	78.8784	139.205	80.1383	120.5	80.4054	120.5	79.0134	140.621	83.8475
	121.5	93.0926	121.5	90.8155	121.5	87.4393	121.5	78.7289	140.205	81.5135	121.5	80.4378	121.5	78.5728	141.621	83.7652
	122.5	94.3645	122.5	90.347	122.5	87.576	122.5	79.4026	141.205	81.2161	122.5	79.6276	122.5	78.6068	142.621	83.5085
	123.5	94.2784	123.5	89.4182	123.5	86.6018	123.5	79.1166	142.205	81.8021	123.5	80.5694	141.991	82.1943	143.621	82.5663
	124.5	93.7616	124.5	90.7742	124.5	88.1015	124.5	79.4903	143.205	81.189	124.5	79.8866	142.991	82.5766	144.621	83.4671
	125.5	93.5137	125.5	90.2563	125.5	87.2911	125.5	79.2572	144.205	80.8036	125.5	80.3527	143.991	83.1483	145.621	83.2942
	126.5	93.9074	126.5	90.2763	126.5	87.7716	126.5	79.6942	145.205	81.5132	126.5	80.8423	144.991	82.4336	146.621	83.5441
	127.5	93.2421	127.5	89.6457	127.5	87.4769	127.5	79.9646	146.205	81.4523	127.5	80.612	145.991	82.0257	147.621	84.3315
	128.5	94.4326	128.5	90.591	128.5	87.4974	128.5	79.2731	147.205	80.9525	128.5	80.5145	146.991	82.5334	148.621	84.2388
	129.5	94.1541	129.5	89.6268	129.5	87.7678	129.5	78.8125	148.205	81.6143	129.5	80.3851	147.991	81.6992	149.621	83.4951
	130.5	93.1045	149.469	88.9113	130.5	88.0802	130.5	79.467	149.205	79.7713	147.526	81.4821	148.991	81.74	150.621	83.68
	131.5	94.0685	150.469	90.3384	131.5	87.0058	131.5	79.2471	150.205	80.8831	148.526	81.4726	149.991	83.1988	151.621	83.4298
	132.5	94.0697	151.469	89.6453	132.5	86.1083	132.5	79.6468	151.205	82.0545	149.526	80.8692	150.991	81.7755	152.621	83.7884
	133.5	93.863	152.469	90.5107	133.5	87.1201	133.5	79.4179	152.205	81.5641	150.526	82.2333	151.991	82.2522	153.621	83.5797
	134.5	93.8516	153.469	90.5771	134.5	87.0502	134.5	78.9489	153.205	81.5783	151.526	81.6821	152.991	81.8705	154.621	83.1753
	135.5	93.9857	154.469	89.1973	135.5	88.0063	135.5	79.335	154.205	83.1256	152.526	82.0051	153.991	82.6205	155.621	83.8096
	136.5	93.8106	155.469	90.6285	155.494	87.3412	136.5	79.5851	155.205	81.1076	153.526	81.9375	154.991	80.7252	156.621	84.0636
	137.5	94.0518	156.469	90.6704	156.494	89.2165	137.5	79.4363	156.205	81.9914	154.526	82.1401	155.991	82.0133	157.621	83.5919
	138.5	93.4826	157.469	91.1811	157.494	87.4239	138.5	79.3443	157.205	82.7637	155.526	81.6202	156.991	82.1841	158.621	82.5083
	139.5	94.159	158.469	90.1324	158.494	87.7917	139.5	80.2947	158.205	81.3623	156.526	82.2387	157.991	81.7088	159.621	83.9575
	140.5	94.3933	159.469	90.5166	159.494	87.7506	140.5	80.5475	159.205	83.1264	157.526	81.3184	158.991	82.767	160.621	84.6474
	141.5	94.3179	160.469	90.0209	160.494	87.7511	141.5	79.013	160.205	81.5934	158.526	81.8402	159.991	82.7711	161.621	84.0224
	142.5	94.1287	161.469	90.5519	161.494	88.0845	142.5	79.7136	161.205	81.9044	159.526	82.1999	160.991	81.6476	162.621	83.2732
	143.5	94.005	162.469	90.9981	162.494	88.266	143.5	79.638	162.205	81.6566	160.526	81.2463	161.991	81.7438	163.621	82.9036
	144.5	94.5581	163.469	90.5001	163.494	87.75	144.5	79.2402	163.205	82.3017	161.526	81.4766	162.991	82.5879	164.621	83.7638
	145.5	94.2201	164.469	91.7595	164.494	87.8786	145.5	79.5146	164.205	82.5808	162.526	81.6229	163.991	82.5844	165.621	83.3978
	146.5	93.6097	165.469	90.1836	165.494	87.2116	146.5	80.2747	165.205	82.0736	163.526	82.2548	164.991	82.7309	166.621	82.7821
	147.5	95.2627	166.469	90.0757	166.494	87.3285	147.5	79.8971	166.205	82.247	164.526	81.6912	165.991	82.4336	167.621	83.6375
	167.531	94.2449	167.469	90.8018	167.494	87.9471	148.5	81.2059	167.205	81.3305	165.526	81.1244	166.991	82.0743	168.621	84.7485
	168.531	94.0786	168.469	91.5007	168.494	88.0522	149.5	79.8496	168.205	82.9346	166.526	81.8041	167.991	82.9488	169.621	83.3764
	169.531	93.9914	169.469	91.253	169.494	87.6874	150.5	80.0165	169.205	81.5521	167.526	82.2303	168.991	82.9026	170.621	82.7986
	170.531	95.0326	170.469	91.2056	170.494	88.4921	151.5	79.1762	170.205	82.0832	168.526	82.3007	169.991	82.9646	171.621	82.923
	171.531	94.3773	171.469	91.9743	171.494	87.7067	152.5	79.6427	171.205	82.7909	169.526	82.0634	170.991	83.3843	172.621	82.9219
	172.531	94.7574	172.469	91.8263	172.494	88.0772	171.98	80.1341	172.205	82.0997	170.526	81.7479	171.991	81.9625	173.621	83.4468
	173.531	94.5616	173.469	92.376	173.494	88.3329	172.98	81.2505	173.205	83.0685	171.526	82.5364	172.991	81.5776	174.621	82.5255
	174.531	94.1923	174.469	92.0578	174.494	88.5076	173.98	81.249	174.205	82.3439	172.526	81.9763	173.991	82.1635	175.621	82.8729
	175.531	95.3518	175.469	90.9851	175.494	88.869	174.98	82.6305	175.205	83.4946	173.526	82.3431	174.991	81.7396	176.621	82.7995
	176.531	95.2539	176.469	91.5538	176.494	88.0377	175.98	82.1133	176.205	83.4488	174.526	81.7455	175.991	81.3941	177.621	83.0247
	177.531	94.2796	177.469	91.7936	177.494	88.7533	176.98	81.6949	177.205	82.7038	175.526	81.9617	176.991	81.5467	178.621	82.588
	178.531	94.6216	178.469	92.2774	178.494	88.7208	177.98	81.5857	178.205	83.6007	176.526	82.6756	177.991	82.2229	179.621	82.4709
	179.531	95.2756	179.469	92.1861	179.494	88.3955	178.98	82.3083	179.205	82.5338	177.526	82.1518	178.991	82.0248	180.621	83.6408
	180.531	94.9496	180.469	91.6401	180.494	89.327	179.98	82.9075	180.205	83.7616	178.526	82.1332	179.991	82.5215	181.621	82.9467
	181.531	94.8164	181.469	92.6274	181.494	88.2618	180.98	81.4816	181.205	83.3522	179.526	83.0894	180.991	82.5929	182.621	82.6557
	182.531	95.4564	182.469	91.7873	182.494	87.8191	181.98	81.807	182.205	82.8833	180.526	82.5399	181.991	83.2936	183.621	83.3302
	183.531	95.6705	183.469	92.6108	183.494	89.0923	182.98	82.7978	183.205	84.047	181.526	81.4082	182.991	81.7946	184.621	83.59
	184.531	94.8743	184.469	92.4836	184.494	88.985	183.98	82.5317	184.205	83.0243	182.526	82.5508	183.991	82.6894	185.621	83.6434
	185.531	95.4478	185.469	92.8707	185.494	87.9594	184.98	81.0731	185.205	83.2655	183.526	83.2686	184.991	82.5741	186.621	82.6762
	186.531	95.3105	186.469	92.3587	186.494	88.1381	185.98	82.0824	186.205	83.3373	184.526	82.4247	185.991	81.5513	187.621	83.1893
	187.531	93.8651	187.469	92.7307	187.494	87.616	186.98	82.6603	187.205	83.1573	185.526	82.963	186.991	82.0281	188.621	81.6693
	188.531	94.7028	188.469	92.6098	188.494	88.6276	187.98	82.662	188.205	83.5153	186.526	82.8875	187.991	82.5769	189.621	83.4008
	189.531	95.4062	189.469	92.7488	189.494	87.919	188.98	83.4765	189.205	82.7036	187.526	82.9404	188.991	82.2825	190.621	83.2889
	190.531	96.4881	190.469	92.967	190.494	87.8152	189.98	82.8341	190.205	84.4889	188.526	82.7479	189.991	82.8387	191.621	83.1184
	191.531	94.9409	191.469	93.5241	191.494	88.7511	190.98	83.636	191.205	83.5839	189.526	83.4303	190.991	82.7467	192.621	82.83
	192.531	96.5791	192.469	92.9205	192.494	88.6426	191.98	83.4843	192.205	84.2289	190.526	82.7539	191.991	83.1347	193.621	82.287
	193.531	95.51	193.469	93.1031	193.494	89.3494	192.98	83.725	193.205	83.2234	191.526	82.8765	192.991	82.2308	194.621	82.0237
	194.531	95.1329	194.469	92.6553	194.494	87.9817	193.98	82.5415	194.205	83.4594	192.526	83.6361	193.991	83.6702	195.621	82.9406
	195.531	97.1094	195.469	94.2041	195.494	89.4034	194.98	82.9172	195.205	84.0933	193.526	83.0275	194.991	82.5776	196.621	82.6119
	196.531	95.5489	196.469	93.5779	196.494	89.1807	195.98	83.0701	196.205	84.8099	194.526	83.1226	195.991	81.9325	197.621	82.4542
	197.531	96.379	197.469	94.0708	197.494	88.6858	196.98	82.8472	197.205	84.4496	195.526	82.3821	196.991	82.9749	198.621	83.0614
	198.531	96.4687	198.469	93.0938	198.494	89.5584	197.98	83.3355	198.205	83.9868	196.526	83.2752	197.991	82.2223	199.621	82.8727
	199.531	96.1397	199.469	93.7554	199.494	89.4393	198.98	83.5576	199.205	84.3359	197.526	83.3763	198.991	81.9114	200.621	81.7422
	200.531	96.4851	200.469	93.4812	200.494	88.7042	199.98	84.0856	200.205	83.3876	198.526	82.9456	199.991	82.6653	201.621	82.6097
	201.531	96.9	201.469	94.7814	201.494	88.8019	200.98	84.2025	201.205	83.8806	199.526	83.912	200.991	82.7256	202.621	81.9454
	202.531	97.0739	202.469	94.1658	202.494	88.5817	201.98	84.0274	202.205	82.9202	200.526	83.7269	201.991	82.4733	203.621	82.2713
	203.531	97.1437	203.469	93.1753	203.494	89.9429	202.98	83.6818	203.205	83.7526	201.526	83.5751	202.991	83.6496	204.621	81.8224
	204.531	96.2713	204.469	94.2768	204.494	89.5607	203.98	84.4406	204.205	84.4913	202.526	83.1452	203.991	82.5002	205.621	81.9317
	205.531	95.816	205.469	94.034	205.494	89.7046	204.98	84.5538	205.205	84.0232	203.526	83.8671	204.991	81.9769	206.621	81.0157
	206.531	96.6879	206.469	95.2105	206.494	89.2357	205.98	84.4015	206.205	84.2837	204.526	83.1051	205.991	83.3894	207.621	81.1474
	207.531	97.3073	207.469	94.4669	207.494	90.2692	206.98	83.7578	207.205	84.8035	205.526	83.8339	206.991	82.3494	208.621	81.974
	208.531	96.7304	208.469	94.7407	208.494	90.0811	207.98	84.3831	208.205	84.7416	206.526	83.6625	207.991	82.76	209.621	81.7436
	209.531	96.6699	209.469	95.4424	209.494	89.5731	208.98	84.7646	209.205	84.9613	207.526	83.9909	208.991	84.1778	210.621	81.9631
	210.531	97.5592	210.469	94.323	210.494	90.2085	209.98	84.066	210.205	84.6936	208.526	83.2141	209.991	82.3695	211.621	81.9324
	211.531	97.3563	211.469	93.9416	211.494	89.6407	210.98	84.1836	211.205	85.0743	209.526	83.3158	210.991	82.684	212.621	82.6205
	212.531	97.2662	212.469	95.0758	212.494	89.6814	211.98	83.8368	212.205	85.291	210.526	84.2455	211.991	82.5555	213.621	81.8904
	213.531	97.3925	213.469	94.7477	213.494	89.3511	212.98	84.6243	213.205	84.8881	211.526	84.4297	212.991	83.3414	214.621	82.6335
	214.531	98.3526	214.469	95.2528	214.494	90.2829	213.98	85.57	214.205	85.4214	212.526	84.5088	213.991	83.3202	215.621	82.5052
	215.531	97.3102	215.469	95.7826	215.494	89.4593	214.98	85.5784	215.205	84.5922	213.526	83.8257	214.991	82.8084	216.621	81.9963
	216.531	98.1476	216.469	94.6546	216.494	90.4946	215.98	85.2225	216.205	84.8295	214.526	83.3863	215.991	82.8103	217.621	82.7922
	217.531	98.6282	217.469	95.0225	217.494	89.6281	216.98	84.2224	217.205	85.5788	215.526	83.5309	216.991	82.4559	218.621	82.1123
	218.531	97.4916	218.469	95.7198	218.494	91.4356	217.98	86.2757	218.205	85.2162	216.526	83.5206	217.991	83.1991	219.621	82.7072
	219.531	99.0592	219.469	94.5882	219.494	91.1214	218.98	85.327	219.205	85.9784	217.526	83.3825	218.991	83.2538	220.621	83.9986
	220.531	98.1349	220.469	95.3436	220.494	91.136	219.98	85.1846	220.205	85.0449	218.526	84.3047	219.991	83.3506	221.621	82.2438
	221.531	98.2837	221.469	96.1542	221.494	90.762	220.98	85.3634	221.205	85.0407	219.526	84.0996	220.991	83.7086	222.621	81.8616
	222.531	99.2352	222.469	93.8953	222.494	91.3151	221.98	85.3827	222.205	85.6375	220.526	83.9736	221.991	83.5406	223.621	82.4592
	223.531	98.6197	223.469	96.0686	223.494	90.4266	222.98	85.3564	223.205	86.1205	221.526	84.4587	222.991	83.8984	224.621	82.6929
	224.531	99.0288	224.469	96.1445	224.494	90.9063	223.98	85.6438	224.205	85.3013	222.526	83.9217	223.991	83.5293	225.621	83.0017
	225.531	98.7629	225.469	96.8619	225.494	90.7788	224.98	85.6033	225.205	85.5923	223.526	84.2529	224.991	83.1854	226.621	82.2889
	226.531	98.8723	226.469	95.7228	226.494	91.5578	225.98	84.9503	226.205	85.1784	224.526	84.9529	225.991	83.4807	227.621	82.8549
	227.531	98.5934	227.469	96.4832	227.494	90.8198	226.98	85.9597	227.205	85.9902	225.526	83.2783	226.991	83.7656	228.621	82.1161
	228.531	98.3412	228.469	96.0962	228.494	91.3324	227.98	85.2933	228.205	85.9118	226.526	84.2782	227.991	83.4124	229.621	82.0334
	229.531	98.7106	229.469	95.4797	229.494	91.5615	228.98	85.5423	229.205	86.3452	227.526	83.8595	228.991	83.847	230.621	81.6331
	230.531	98.9594	230.469	96.9887	230.494	91.8663	229.98	86.0339	230.205	85.969	228.526	84.4276	229.991	83.3505	231.621	81.33
	231.531	98.6429	231.469	96.3456	231.494	91.5264	230.98	85.3448	231.205	86.1536	229.526	84.3812	230.991	83.4035	232.621	80.3139
	232.531	98.866	232.469	96.3457	232.494	92.5785	231.98	86.399	232.205	86.3055	230.526	84.1948	231.991	83.9328	233.621	82.2311
	233.531	99.313	233.469	95.2454	233.494	91.5665	232.98	85.9105	233.205	86.527	231.526	84.7281	232.991	83.4985	234.621	81.7825
	234.531	99.2239	234.469	97.1036	234.494	91.4329	233.98	86.3179	234.205	85.8245	232.526	83.8904	233.991	83.6885	235.621	82.626
	235.531	98.6633	235.469	96.0866	235.494	92.3742	234.98	86.8064	235.205	86.8336	233.526	84.653	234.991	84.0655	236.621	81.5395
	236.531	99.8939	236.469	95.9665	236.494	92.0724	235.98	86.5996	236.205	85.8911	234.526	85.2692	235.991	84.3007	237.621	82.4306
	237.531	99.0097	237.469	97.2992	237.494	92.3196	236.98	85.9576	237.205	85.9113	235.526	84.4685	236.991	83.3278	238.621	82.5055
	238.531	99.4103	238.469	96.524	238.494	92.5849	237.98	86.8697	238.205	86.2278	236.526	84.9597	237.991	83.9557	239.621	82.3534
	239.531	99.9539	239.469	97.0455	239.494	92.9352	238.98	86.5016	239.205	85.5017	237.526	84.0724	238.991	84.1671	240.621	82.6861
	240.531	100.231	240.469	97.3024	240.494	92.294	239.98	87.0471	240.205	87.236	238.526	84.6985	239.991	83.369	241.621	82.185
	241.531	99.343	241.469	97.4001	241.494	91.973	240.98	86.6302	241.205	86.1206	239.526	84.245	240.991	83.5475	242.621	81.5975
	242.531	99.6757	242.469	97.2522	242.494	92.7983	241.98	86.37	242.205	87.0559	240.526	85.5499	241.991	84.3063	243.621	82.0308
	243.531	100.16	243.469	97.6681	243.494	91.9301	242.98	86.4188	243.205	85.5455	241.526	85.0643	242.991	83.5704	244.621	81.6468
	244.531	100.569	244.469	97.6553	244.494	92.2483	243.98	86.9715	244.205	86.091	242.526	84.7701	243.991	82.8965	245.621	82.4916
	245.531	100.366	245.469	98.0722	245.494	93.188	244.98	87.7065	245.205	86.4695	243.526	84.6251	244.991	84.5295	246.621	81.8898
	246.531	100.668	246.469	97.052	246.494	93.0934	245.98	86.8099	246.205	87.0854	244.526	85.1422	245.991	83.8192	247.621	81.2842
	247.531	100.157	247.469	97.1898	247.494	93.6564	246.98	87.2689	247.205	86.204	245.526	83.9381	246.991	84.2687	248.621	82.185
	248.531	100.498	248.469	98.1561	248.494	92.8968	247.98	85.8619	248.205	87.4865	246.526	84.9776	247.991	82.823	249.621	82.4354
	249.531	99.9481	249.469	97.2973	249.494	94.1238	248.98	86.304	249.205	86.2112	247.526	84.9383	248.991	83.4454	250.621	81.5328
	250.531	101.17	250.469	98.0573	250.494	92.6321	249.98	86.2689	250.205	86.9723	248.526	85.0316	249.991	82.825	251.621	82.1147
	251.531	101.456	251.469	98.2301	251.494	93.7427	250.98	87.5271	251.205	86.9904	249.526	85.3387	250.991	83.795	252.621	81.7581
	252.531	101.412	252.469	98.4758	252.494	93.061	251.98	86.7318	252.205	86.973	250.526	84.7374	251.991	82.7217	253.621	80.7886
	253.531	100.532	253.469	99.377	253.494	93.1751	252.98	87.6992	253.205	85.9567	251.526	84.8626	252.991	83.5386	254.621	81.9484
	254.531	100.396	254.469	97.8255	254.494	93.73	253.98	87.1614	254.205	86.6235	252.526	85.6998	253.991	84.2412	255.621	82.714
	255.531	101.403	255.469	97.7799	255.494	93.2352	254.98	87.2302	255.205	86.5947	253.526	85.7765	254.991	83.519	256.621	82.2764
	256.531	100.33	256.469	97.9368	256.494	94.2609	255.98	86.9738	256.205	86.876	254.526	85.3482	255.991	83.2669	257.621	82.179
	257.531	100.502	257.469	98.9644	257.494	92.766	256.98	87.6725	257.205	87.8642	255.526	84.8408	256.991	83.882	258.621	82.3491
	258.531	100.597	258.469	99.6103	258.494	93.7463	257.98	88.4516	258.205	87.4926	256.526	85.2106	257.991	83.1022	259.621	81.7077
	259.531	101.541	259.469	98.4529	259.494	94.0666	258.98	87.8675	259.205	86.8778	257.526	84.7572	258.991	83.6965	260.621	82.4555
	260.531	101.151	260.469	98.7267	260.494	93.804	259.98	87.4141	260.205	87.5801	258.526	84.3603	259.991	83.8969	261.621	81.942
	261.531	101.579	261.469	98.8683	261.494	93.9351	260.98	88.091	261.205	86.6756	259.526	86.0649	260.991	84.3069	262.621	81.3098
	262.531	101.447	262.469	98.8509	262.494	94.1338	261.98	88.0453	262.205	87.7336	260.526	85.498	261.991	84.3193	263.621	83.0779
	263.531	101.726	263.469	99.4428	263.494	93.901	262.98	89.1816	263.205	87.0763	261.526	85.8181	262.991	84.7569	264.621	81.9291
	264.531	101.029	264.469	98.4873	264.494	94.3265	263.98	88.2971	264.205	87.0001	262.526	85.9596	263.991	84.0529	265.621	82.8592
	265.531	103.058	265.469	99.7214	265.494	94.0337	264.98	87.9306	265.205	87.2611	263.526	84.8448	264.991	83.7528	266.621	82.5204
	266.531	101.829	266.469	99.2216	266.494	94.5008	265.98	88.5763	266.205	86.8015	264.526	86.3185	265.991	84.8992	267.621	82.2519
	267.531	101.218	267.469	99.1831	267.494	93.677	266.98	87.6662	267.205	87.4079	265.526	85.5781	266.991	83.7383	268.621	82.2407
	268.531	101.607	268.469	99.3793	268.494	94.5284	267.98	88.2367	268.205	87.8586	266.526	86.7142	267.991	83.06	269.621	82.3129
	269.531	102.37	269.469	98.9612	269.494	94.0748	268.98	88.9056	269.205	87.021	267.526	85.6305	268.991	82.6452	270.621	82.6745
	270.531	101.67	270.469	99.9568	270.494	95.2411	269.98	89.2929	270.205	87.8045	268.526	84.8626	269.991	84.2765	271.621	81.9044
	271.531	101.58	271.469	98.5821	271.494	95.4802	270.98	88.7113	271.205	87.8757	269.526	85.3791	270.991	84.0589	272.621	82.1245
	272.531	101.66	272.469	99.9129	272.494	94.3402	271.98	87.8235	272.205	87.5556	270.526	85.102	271.991	84.3952	273.621	82.7104
	273.531	102.631	273.469	99.596	273.494	94.5638	272.98	89.5965	273.205	87.942	271.526	85.6881	272.991	84.7638	274.621	81.9198
	274.531	102.286	274.469	99.5519	274.494	94.9406	273.98	88.9832	274.205	88.167	272.526	85.9734	273.991	83.9826	275.621	82.5568
	275.531	102.003	275.469	100.292	275.494	94.0423	274.98	89.6279	275.205	88.7823	273.526	86.2391	274.991	84.145	276.621	81.7852
	276.531	103.007	276.469	99.345	276.494	95.1565	275.98	88.7131	276.205	88.2925	274.526	85.4065	275.991	84.0308	277.621	82.8857
	277.531	102.667	277.469	99.6734	277.494	95.7526	276.98	88.4415	277.205	86.9833	275.526	85.1947	276.991	84.0985	278.621	82.4438
	278.531	102.552	278.469	99.7989	278.494	94.3845	277.98	89.4178	278.205	88.5069	276.526	85.4174	277.991	84.5216	279.621	82.1498
	279.531	103.398	279.469	100.558	279.494	95.3134	278.98	88.1386	279.205	87.7201	277.526	85.6944	278.991	84.3274	280.621	81.7899
	280.531	102.531	280.469	100.293	280.494	95.06	279.98	89.219	280.205	87.3442	278.526	85.3489	279.991	83.4341	281.621	82.5877
	281.531	103.639	281.469	100.245	281.494	95.4418	280.98	89.0135	281.205	87.9076	279.526	85.3729	280.991	84.1869	282.621	81.7047
	282.531	102.147	282.469	100.851	282.494	93.8155	281.98	89.1191	282.205	88.1367	280.526	84.991	281.991	83.9804	283.621	82.8271
	283.531	102.436	283.469	101.212	283.494	95.622	282.98	89.1564	283.205	88.7774	281.526	85.6675	282.991	83.3856	284.621	82.2111
	284.531	102.038	284.469	100.403	284.494	95.0172	283.98	89.3934	284.205	88.5813	282.526	85.4989	283.991	84.4251	285.621	82.3324
	285.531	103.093	285.469	99.7409	285.494	95.0983	284.98	89.0824	285.205	88.1839	283.526	85.901	284.991	84.1177	286.621	82.2679
	286.531	103.136	286.469	99.7112	286.494	95.3527	285.98	88.7145	286.205	88.2098	284.526	87.4619	285.991	83.5789	287.621	82.3003
	287.531	103.373	287.469	100.739	287.494	95.382	286.98	89.5725	287.205	87.9186	285.526	85.7938	286.991	84.8443	288.621	82.2602
	288.531	103.194	288.469	100.111	288.494	95.2246	287.98	90.1259	288.205	87.9771	286.526	86.4692	287.991	83.5246	289.621	81.4839
	289.531	103.845	289.469	100.943	289.494	95.2226	288.98	89.7249	289.205	88.274	287.526	87.6565	288.991	84.9875	290.621	82.3356
	290.531	103.544	290.469	101.573	290.494	94.6226	289.98	89.7066	290.205	88.6032	288.526	86.2631	289.991	84.5135	291.621	81.8
	291.531	103.787	291.469	101.671	291.494	95.5844	290.98	90.0142	291.205	89.1491	289.526	86.7915	290.991	84.2449	292.621	82.2936
	292.531	104.494	292.469	100.451	292.494	95.0832	291.98	90.1387	292.205	88.9769	290.526	86.4786	291.991	84.5868	293.621	81.6634
	293.531	103.895	293.469	100.867	293.494	96.4414	292.98	90.2234	293.205	88.7801	291.526	86.1662	292.991	84.3061	294.621	81.4695
	294.531	103.192	294.469	101.869	294.494	96.4613	293.98	90.3919	294.205	89.1037	292.526	86.1089	293.991	83.5021	295.621	82.291
	295.531	104.034	295.469	100.05	295.494	96.2741	294.98	90.4202	295.205	88.6937	293.526	86.1891	294.991	84.5126	296.621	81.8094
	296.531	105.104	296.469	100.433	296.494	96.1068	295.98	90.6212	296.205	89.2163	294.526	85.9992	295.991	84.1657	297.621	82.1385
	297.531	104.856	297.469	100.906	297.494	95.8462	296.98	90.9711	297.205	88.6864	295.526	86.2868	296.991	83.563	298.621	82.2277
	298.531	104.609	298.469	101.342	298.494	96.1369	297.98	90.5408	298.205	88.7007	296.526	86.7848	297.991	84.2678	299.621	82.215
	299.531	104.431	299.469	101.7	299.494	96.5538	298.98	90.8768	299.205	89.2445	297.526	86.8099	298.991	84.3561	300.621	82.641
	300.531	105.185	300.469	101.312	300.494	96.2404	299.98	89.8916	300.205	88.8804	298.526	86.3808	299.991	83.8192	301.621	81.9869
	301.531	104.183	301.469	101.994	301.494	96.3398	300.98	89.8042	301.205	89.555	299.526	86.7169	300.991	84.7625	302.621	82.1911
	302.531	102.964	302.469	100.923	302.494	96.8232	301.98	91.4897	302.205	89.5688	300.526	86.4143	301.991	84.6415	303.621	81.7644
	303.531	105.525	303.469	101.656	303.494	96.7802	302.98	90.3131	303.205	88.3287	301.526	86.9769	302.991	84.0908	304.621	82.0536
	304.531	104.843	304.469	103.072	304.494	96.3107	303.98	90.1739	304.205	89.388	302.526	86.4355	303.991	84.7005	305.621	82.6071
	305.531	105.068	305.469	101.653	305.494	97.3587	304.98	89.9096	305.205	89.5257	303.526	86.5382	304.991	84.5802	306.621	82.0179
	306.531	104.41	306.469	102.507	306.494	95.8896	305.98	90.5851	306.205	88.6162	304.526	87.4546	305.991	84.4886	307.621	82.1699
	307.531	105.204	307.469	102.365	307.494	96.192	306.98	91.048	307.205	89.1843	305.526	86.4897	306.991	85.7653	308.621	82.2883
	308.531	105.813	308.469	101.436	308.494	96.3734	307.98	89.8114	308.205	89.1425	306.526	86.3314	307.991	84.7784	309.621	81.106
	309.531	104.466	309.469	102.543	309.494	96.0701	308.98	91.3225	309.205	89.1009	307.526	86.3532	308.991	83.9123	310.621	82.1845
	310.531	106.164	310.469	102.735	310.494	96.637	309.98	91.4376	310.205	89.3011	308.526	86.848	309.991	84.2903	311.621	83.0174
	311.531	104.987	311.469	102.746	311.494	96.6537	310.98	90.7946	311.205	88.6259	309.526	86.3124	310.991	85.2013	312.621	81.7329
	312.531	104.941	312.469	101.733	312.494	97.3756	311.98	90.9515	312.205	89.1243	310.526	86.6499	311.991	84.0734	313.621	81.8103
	313.531	105.043	313.469	101.923	313.494	96.6719	312.98	91.0102	313.205	89.9192	311.526	86.7554	312.991	84.5236	314.621	82.2427
	314.531	105.76	314.469	103.218	314.494	96.7161	313.98	91.5434	314.205	89.9754	312.526	87.5723	313.991	84.1343	315.621	81.8715
	315.531	105.511	315.469	103.673	315.494	97.1168	314.98	91.88	315.205	89.3125	313.526	86.9379	314.991	84.9647	316.621	81.8263
	316.531	106.697	316.469	101.759	316.494	97.7114	315.98	91.996	316.205	90.1019	314.526	87.3931	315.991	84.9226	317.621	82.1489
	317.531	106.291	317.469	103.683	317.494	96.3467	316.98	91.4115	317.205	90.2285	315.526	87.5907	316.991	84.3476	318.621	81.5244
	318.531	105.811	318.469	102.934	318.494	97.0377	317.98	92.5516	318.205	90.1391	316.526	87.542	317.991	85.5058	319.621	81.9338
	319.531	105.988	319.469	102.135	319.494	97.8804	318.98	91.6924	319.205	90.1541	317.526	87.4676	318.991	83.9197	320.621	82.4575
	320.531	106.231	320.469	101.952	320.494	97.416	319.98	91.6839	320.205	89.6802	318.526	87.9712	319.991	84.3445	321.621	82.0391
	321.531	105.547	321.469	102.944	321.494	98.2938	320.98	91.9632	321.205	90.5396	319.526	87.2922	320.991	84.8783	322.621	82.5829
	322.531	105.991	322.469	103.705	322.494	97.4974	321.98	91.8934	322.205	90.1806	320.526	87.2195	321.991	84.7594	323.621	82.8284
	323.531	105.809	323.469	102.823	323.494	97.5844	322.98	92.0254	323.205	89.9633	321.526	86.7496	322.991	84.3752	324.621	82.8853
	324.531	105.837	324.469	103.693	324.494	97.6319	323.98	92.0711	324.205	89.9364	322.526	88.3976	323.991	84.6822	325.621	82.961
	325.531	106.084	325.469	102.966	325.494	97.3558	324.98	91.6459	325.205	89.2733	323.526	88.0923	324.991	83.6142	326.621	82.3751
	326.531	106.363	326.469	103.688	326.494	98.7316	325.98	91.9316	326.205	89.5624	324.526	86.7864	325.991	85.0717	327.621	81.8831
	327.531	105.833	327.469	104.474	327.494	97.8041	326.98	93.0125	327.205	89.8168	325.526	87.337	326.991	83.7711	328.621	81.7918
	328.531	107.034	328.469	103.016	328.494	96.6351	327.98	92.3922	328.205	90.7586	326.526	87.5401	327.991	83.6552	329.621	82.1713
	329.531	105.744	329.469	103.515	329.494	98.02	328.98	92.0396	329.205	90.2834	327.526	86.7288	328.991	84.8748	330.621	81.473
	330.531	106.387	330.469	103.577	330.494	98.5996	329.98	92.1192	330.205	89.8774	328.526	87.1364	329.991	84.2355	331.621	82.4629
	331.531	106.659	331.469	103.696	331.494	98.2953	330.98	92.2535	331.205	90.3567	329.526	86.798	330.991	84.7798	332.621	82.8879
	332.531	105.987	332.469	103.475	332.494	98.6052	331.98	92.8884	332.205	90.4223	330.526	86.9656	331.991	84.7854	333.621	81.874
	333.531	106.788	333.469	104.422	333.494	98.9212	332.98	92.3788	333.205	90.9868	331.526	88.1963	332.991	84.6065	334.621	82.1078
	334.531	106.219	334.469	104.572	334.494	98.1376	333.98	92.3413	334.205	90.1435	332.526	88.2342	333.991	85.7668	335.621	82.5546
	335.531	106.405	335.469	104.683	335.494	97.1812	334.98	92.0871	335.205	90.5279	333.526	88.3281	334.991	85.0087	336.621	82.9696
	336.531	105.979	336.469	103.527	336.494	98.1833	335.98	92.8548	336.205	90.816	334.526	87.5458	335.991	85.1195	337.621	82.4699
	337.531	107.617	337.469	105.059	337.494	98.4408	336.98	93.0604	337.205	90.5223	335.526	87.51	336.991	84.9814	338.621	82.5885
	338.531	107.054	338.469	105.028	338.494	99.3538	337.98	92.7315	338.205	90.3489	336.526	87.471	337.991	84.2662	339.621	82.2676
	339.531	106.741	339.469	105.016	339.494	98.2666	338.98	93.6105	339.205	90.1498	337.526	87.9524	338.991	84.8242	340.621	82.2943
	340.531	106.612	340.469	105.575	340.494	98.9238	339.98	93.175	340.205	90.8123	338.526	88.3027	339.991	84.5714	341.621	83.1201
	341.531	107.103	341.469	103.627	341.494	98.919	340.98	92.9314	341.205	89.6613	339.526	88.0278	340.991	84.9947	342.621	82.4233
	342.531	107.176	342.469	106.197	342.494	99.3347	341.98	92.884	342.205	90.7508	340.526	87.6985	341.991	84.7137	343.621	82.3712
	343.531	107.161	343.469	105.584	343.494	99.0689	342.98	94.0603	343.205	90.6572	341.526	87.4403	342.991	84.4145	344.621	81.6152
	344.531	107.174	344.469	105.624	344.494	98.9399	343.98	93.9899	344.205	90.7223	342.526	87.5427	343.991	85.7907	345.621	82.2461
	345.531	107.758	345.469	105.246	345.494	99.1855	344.98	94.4215	345.205	90.3962	343.526	88.492	344.991	84.4246	346.621	83.0337
	346.531	108.2	346.469	105.3	346.494	98.5439	345.98	93.1707	346.205	91.194	344.526	88.5246	345.991	85.3284	347.621	81.0675
	347.531	107.946	347.469	106.079	347.494	98.8719	346.98	93.4635	347.205	90.6511	345.526	87.7453	346.991	84.6379	348.621	82.3249
	348.531	108.512	348.469	105.735	348.494	99.8472	347.98	93.5348	348.205	91.3647	346.526	88.638	347.991	84.3356	349.621	83.382
	349.531	107.692	349.469	105.183	349.494	100.524	348.98	94.1347	349.205	91.4271	347.526	88.1403	348.991	85.0599	350.621	82.3798
	350.531	107.491	350.469	106.206	350.494	99.3466	349.98	94.5566	350.205	91.7119	348.526	87.9993	349.991	84.9505	351.621	82.0567
	351.531	108.351	351.469	105.451	351.494	99.3922	350.98	93.5766	351.205	91.3921	349.526	88.379	350.991	84.5765	352.621	82.5429
	352.531	108.984	352.469	105.93	352.494	99.1185	351.98	93.8737	352.205	90.3374	350.526	87.7931	351.991	85.7904	353.621	81.909
	353.531	107.55	353.469	106.247	353.494	99.35	352.98	94.0808	353.205	90.6483	351.526	88.0801	352.991	84.267	354.621	81.4545
	354.531	108.807	354.469	106.397	354.494	98.9339	353.98	94.4471	354.205	91.7141	352.526	88.5951	353.991	84.3862	355.621	82.3305
	355.531	108.364	355.469	105.884	355.494	100.244	354.98	93.7005	355.205	90.2857	353.526	88.5241	354.991	84.6501	356.621	81.9037
	356.531	108.725	356.469	106.722	356.494	99.1247	355.98	93.8232	356.205	92.5227	354.526	88.1851	355.991	84.4184	357.621	81.585
	357.531	107.358	357.469	106.405	357.494	99.8419	356.98	93.7354	357.205	91.6578	355.526	88.3437	356.991	84.9518	358.621	81.9511
	358.531	108.797	358.469	106.563	358.494	99.6315	357.98	94.9486	358.205	91.6191	356.526	88.5891	357.991	85.6822	359.621	81.7283
	359.531	108.307	359.469	106.766	359.494	100.393	358.98	93.695	359.205	91.2827	357.526	89.0603	358.991	85.2548	360.621	81.7423
	360.531	110.045	360.469	106.442	360.494	100.775	359.98	93.9506	360.205	91.5872	358.526	88.5628	359.991	84.7148	361.621	81.9456
	361.531	108.928	361.469	107.288	361.494	99.2934	360.98	94.8816	361.205	91.2714	359.526	88.8742	360.991	85.3262	362.621	81.8
	362.531	108.683	362.469	107.16	362.494	100.258	361.98	94.7343	362.205	92.3964	360.526	88.3821	361.991	85.085	363.621	82.4089
	363.531	107.846	363.469	106.835	363.494	100.423	362.98	94.2973	363.205	91.8186	361.526	88.0987	362.991	84.9913	364.621	82.2655
	364.531	108.899	364.469	106.306	364.494	99.7981	363.98	94.5898	364.205	91.9381	362.526	88.8352	363.991	84.8188	365.621	82.3783
	365.531	108.646	365.469	107.152	365.494	99.9153	364.98	94.6685	365.205	91.6451	363.526	88.7438	364.991	85.9018	366.621	81.9618
	366.531	108.404	366.469	107.331	366.494	99.8237	365.98	94.7306	366.205	91.8888	364.526	88.7661	365.991	84.5652	367.621	82.1849
	367.531	109.052	367.469	107.609	367.494	99.896	366.98	95.3367	367.205	92.3878	365.526	88.4437	366.991	85.4369	368.621	82.1353
	368.531	109.379	368.469	106.331	368.494	100.736	367.98	95.044	368.205	91.3948	366.526	87.8492	367.991	84.2895	369.621	82.2261
	369.531	110.01	369.469	107.835	369.494	100.555	368.98	95.5654	369.205	92.3934	367.526	87.4007	368.991	83.9803	370.621	82.2287
	370.531	109.827	370.469	107.3	370.494	99.985	369.98	95.2554	370.205	93.1421	368.526	89.1615	369.991	85.16	371.621	82.3516
	371.531	108.931	371.469	107.366	371.494	101.224	370.98	93.8348	371.205	92.2157	369.526	87.2877	370.991	84.8027	372.621	81.4818
	372.531	109.998	372.469	107.006	372.494	99.9004	371.98	95.5421	372.205	91.9851	370.526	89.882	371.991	84.5215	373.621	82.1756
	373.531	110.14	373.469	107.688	373.494	100.496	372.98	94.8453	373.205	93.3814	371.526	88.6329	372.991	85.0083	374.621	82.3256
	374.531	109.426	374.469	107.808	374.494	101.029	373.98	95.3638	374.205	91.9475	372.526	88.642	373.991	85.0381	375.621	82.2739
	375.531	109.48	375.469	107.184	375.494	100.522	374.98	94.652	375.205	92.3656	373.526	88.9667	374.991	85.5631	376.621	82.1283
	376.531	109.813	376.469	107.505	376.494	100.98	375.98	94.386	376.205	92.3884	374.526	89.0186	375.991	85.5684	377.621	82.3207
	377.531	109.173	377.469	107.357	377.494	101.429	376.98	95.1914	377.205	91.3743	375.526	88.2863	376.991	85.3251	378.621	81.4913
	378.531	110.398	378.469	107.72	378.494	101.396	377.98	95.1866	378.205	92.5666	376.526	89.2902	377.991	85.0649	379.621	81.9569
	379.531	108.988	379.469	108.325	379.494	100.713	378.98	95.4954	379.205	91.7163	377.526	88.8618	378.991	85.5385	380.621	81.8083
	380.531	110.522	380.469	106.794	380.494	100.878	379.98	95.5093	380.205	92.401	378.526	88.0982	379.991	84.5925	381.621	82.319
	381.531	110.699	381.469	107.55	381.494	101.219	380.98	96.4683	381.205	92.0713	379.526	88.05	380.991	85.5896	382.621	81.9096
	382.531	110.364	382.469	107.376	382.494	101.242	381.98	96.2398	382.205	92.763	380.526	89.2442	381.991	85.8706	383.621	82.4121
	383.531	110.435	383.469	107.954	383.494	100.691	382.98	96.0312	383.205	92.239	381.526	89.2747	382.991	85.665	384.621	81.5065
	384.531	110.359	384.469	108.028	384.494	100.475	383.98	95.5235	384.205	92.9918	382.526	89.5422	383.991	84.6445	385.621	81.9082
	385.531	110.083	385.469	107.798	385.494	101.223	384.98	95.6263	385.205	92.8427	383.526	88.9976	384.991	84.4126	386.621	81.4261
	386.531	110.192	386.469	107.564	386.494	100.223	385.98	95.7014	386.205	93.2759	384.526	89.3726	385.991	85.0076	387.621	82.6245
	387.531	110.706	387.469	107.734	387.494	101.274	386.98	96.2038	387.205	92.4432	385.526	89.722	386.991	84.7935	388.621	82.5621
	388.531	111.038	388.469	107.774	388.494	101.015	387.98	95.7613	388.205	93.07	386.526	88.8727	387.991	85.5544	389.621	81.9847
	389.531	111.267	389.469	107.338	389.494	102.03	388.98	96.2806	389.205	92.5052	387.526	89.3221	388.991	85.7815	390.621	81.5636
	390.531	110.089	390.469	108.542	390.494	102.104	389.98	95.7382	390.205	92.4908	388.526	87.9908	389.991	85.7596	391.621	82.075
	391.531	110.466	391.469	108.548	391.494	101.177	390.98	95.4816	391.205	92.4238	389.526	88.9706	390.991	85.1851	392.621	82.4297
	392.531	110.92	392.469	108.191	392.494	101.817	391.98	96.2444	392.205	93.4778	390.526	90.0125	391.991	85.2739	393.621	81.9595
	393.531	110.591	393.469	108.889	393.494	102.097	392.98	96.5613	393.205	93.8357	391.526	89.6939	392.991	84.1462	394.621	81.7618
	394.531	110.904	394.469	107.743	394.494	102.277	393.98	96.0075	394.205	92.7794	392.526	89.1816	393.991	85.479	395.621	82.28
	395.531	111.089	395.469	108.259	395.494	101.792	394.98	95.4657	395.205	93.7066	393.526	88.6017	394.991	83.7075	396.621	81.1148
	396.531	110.543	396.469	108.42	396.494	102.067	395.98	96.4242	396.205	92.8125	394.526	89.1361	395.991	85.6843	397.621	82.8955
	397.531	110.731	397.469	108.097	397.494	101.669	396.98	95.4812	397.205	92.569	395.526	88.7512	396.991	85.1573	398.621	82.5469
	398.531	110.701	398.469	108.083	398.494	101.55	397.98	96.0077	398.205	93.7826	396.526	89.039	397.991	85.947	399.621	82.3191
	399.531	110.673	399.469	107.545	399.494	102.205	398.98	95.6164	399.205	93.2587	397.526	89.3879	398.991	85.6196	400.621	81.7862
	400.531	112.039	400.469	108.311	400.494	101.701	399.98	95.8434	400.205	93.4445	398.526	89.2799	399.991	85.447	401.621	82.7323
	401.531	112.453	401.469	108.452	401.494	101.424	400.98	96.6717	401.205	93.012	399.526	89.4528	400.991	85.3177	402.621	81.4143
	402.531	111.398	402.469	108.492	402.494	102.472	401.98	96.0509	402.205	93.9167	400.526	88.9962	401.991	85.5135	403.621	82.7088
	403.531	112.286	403.469	109.492	403.494	102.25	402.98	96.4042	403.205	92.9383	401.526	88.3518	402.991	85.9485	404.621	82.0381
	404.531	111.583	404.469	108.959	404.494	102.283	403.98	96.9501	404.205	93.6767	402.526	89.7119	403.991	85.3128	405.621	82.0698
	405.531	111.265	405.469	107.241	405.494	101.761	404.98	96.7125	405.205	92.7914	403.526	89.1808	404.991	85.8582	406.621	82.1632
	406.531	111.765	406.469	109.539	406.494	102.276	405.98	96.9733	406.205	93.6141	404.526	88.7841	405.991	85.4597	407.621	82.2555
	407.531	111.618	407.469	107.872	407.494	101.63	406.98	96.6282	407.205	93.8804	405.526	88.8672	406.991	86.5053	408.621	82.9722
	408.531	111.919	408.469	108.599	408.494	101.124	407.98	97.522	408.205	93.4445	406.526	89.4455	407.991	85.7835	409.621	82.6913
	409.531	111.9	409.469	108.037	409.494	101.789	408.98	96.0064	409.205	93.8114	407.526	88.5887	408.991	85.4652	410.621	82.4412
	410.531	111.845	410.469	108.408	410.494	102.405	409.98	96.7239	410.205	92.9553	408.526	89.5276	409.991	86.5287	411.621	81.6845
	411.531	113.198	411.469	108.836	411.494	102.02	410.98	97.1259	411.205	92.9282	409.526	88.7789	410.991	85.422	412.621	81.9091
	412.531	112.642	412.469	109.021	412.494	102.577	411.98	96.6693	412.205	93.4467	410.526	90.3306	411.991	85.0818	413.621	81.8594
	413.531	111.643	413.469	108.402	413.494	102.976	412.98	98.3093	413.205	93.173	411.526	89.0202	412.991	85.3604	414.621	82.606
	414.531	111.505	414.469	109.377	414.494	102.892	413.98	96.9298	414.205	93.6926	412.526	89.8898	413.991	85.7653	415.621	83.088
	415.531	112.834	415.469	107.522	415.494	102.953	414.98	96.8983	415.205	94.2061	413.526	89.3115	414.991	84.9065	416.621	82.4413
	416.531	112.349	416.469	109.066	416.494	102.71	415.98	97.1333	416.205	93.035	414.526	89.239	415.991	85.7866	417.621	82.1743
	417.531	112.574	417.469	108.582	417.494	102.544	416.98	97.2729	417.205	93.3062	415.526	89.0106	416.991	85.5514	418.621	81.6629
	418.531	112.287	418.469	109.852	418.494	102.434	417.98	97.7384	418.205	93.4956	416.526	90.4497	417.991	85.4542	419.621	82.137
	419.531	112.93	419.469	109.086	419.494	103.026	418.98	96.6918	419.205	93.7671	417.526	89.0913	418.991	86.0835	420.621	81.6508
	420.531	112.75	420.469	109.582	420.494	102.496	419.98	96.7202	420.205	93.406	418.526	89.8979	419.991	85.6166	421.621	82.3311
	421.531	113.529	421.469	109.522	421.494	102.852	420.98	97.8435	421.205	93.6138	419.526	89.6551	420.991	85.9317	422.621	82.2924
	422.531	113.414	422.469	109.855	422.494	103.769	421.98	97.7564	422.205	93.1869	420.526	89.3558	421.991	85.4646	423.621	82.2869
	423.531	111.778	423.469	108.573	423.494	103.221	422.98	98.2765	423.205	93.5819	421.526	90.5753	422.991	85.405	424.621	80.8972
	424.531	113.413	424.469	109.842	424.494	102.298	423.98	98.4318	424.205	93.5278	422.526	89.0032	423.991	85.1222	425.621	81.8483
	425.531	112.668	425.469	109.27	425.494	102.674	424.98	98.7758	425.205	94.6686	423.526	89.5691	424.991	85.26	426.621	82.8541
	426.531	113.243	426.469	108.851	426.494	103.034	425.98	97.5494	426.205	94.4828	424.526	90.0189	425.991	85.6481	427.621	82.0606
	427.531	112.579	427.469	110.073	427.494	103.705	426.98	97.8734	427.205	94.8029	425.526	89.6642	426.991	86.2281	428.621	82.3733
	428.531	112.673	428.469	111.316	428.494	103.576	427.98	97.7356	428.205	93.3986	426.526	89.6615	427.991	85.9612	429.621	82.4334
	429.531	112.744	429.469	109.697	429.494	103.849	428.98	97.677	429.205	94.2423	427.526	89.2598	428.991	85.3041	430.621	81.685
	430.531	113.463	430.469	110.125	430.494	104.109	429.98	98.1383	430.205	94.5128	428.526	89.3244	429.991	85.2924	431.621	82.2049
	431.531	112.492	431.469	110.188	431.494	103.742	430.98	98.8638	431.205	94.4722	429.526	89.4075	430.991	86.0689	432.621	81.8412
	432.531	113.98	432.469	110.188	432.494	104.521	431.98	98.685	432.205	93.72	430.526	89.4667	431.991	85.7831	433.621	82.0708
	433.531	113.026	433.469	109.879	433.494	104.938	432.98	97.6259	433.205	94.6382	431.526	89.9817	432.991	85.5697	434.621	82.0864
	434.531	113.662	434.469	110.771	434.494	103.891	433.98	97.9327	434.205	94.1456	432.526	89.8186	433.991	85.9157	435.621	82.8173
	435.531	113.552	435.469	109.718	435.494	103.232	434.98	97.57	435.205	93.8236	433.526	90.9909	434.991	85.5464	436.621	82.03
	436.531	113.166	436.469	110.639	436.494	104.469	435.98	99.0205	436.205	94.3273	434.526	89.6855	435.991	86.1022	437.621	81.723
	437.531	113.224	437.469	110.139	437.494	104.108	436.98	98.756	437.205	94.1705	435.526	90.6287	436.991	85.498	438.621	82.2797
	438.531	113.104	438.469	111.092	438.494	104.912	437.98	97.6366	438.205	94.2366	436.526	90.4486	437.991	86.0808	439.621	82.153
	439.531	114.066	439.469	110.627	439.494	105.042	438.98	98.7668	439.205	94.2671	437.526	89.8922	438.991	85.4039	440.621	82.7769
	440.531	113.79	440.469	109.463	440.494	103.714	439.98	98.5176	440.205	94.686	438.526	91.5032	439.991	85.9582	441.621	81.481
	441.531	113.922	441.469	111.733	441.494	103.684	440.98	98.2748	441.205	94.8641	439.526	90.1282	440.991	85.4214	442.621	81.7597
	442.531	114.439	442.469	110.632	442.494	104.399	441.98	99.6969	442.205	94.457	440.526	89.8386	441.991	85.2771	443.621	81.636
	443.531	113.86	443.469	109.529	443.494	104.317	442.98	99.0373	443.205	94.927	441.526	90.9438	442.991	86.5281	444.621	81.1687
	444.531	114.005	444.469	110.074	444.494	105.025	443.98	99.2075	444.205	94.2663	442.526	89.5427	443.991	86.0135	445.621	81.8265
	445.531	113.858	445.469	111.079	445.494	105.192	444.98	99.4513	445.205	94.2609	443.526	90.3587	444.991	85.7141	446.621	81.3747
	446.531	114.367	446.469	111.962	446.494	103.822	445.98	98.5295	446.205	94.9843	444.526	91.2219	445.991	86.1488	447.621	82.4722
	447.531	114.224	447.469	111.325	447.494	104.463	446.98	99.5224	447.205	94.5492	445.526	89.7536	446.991	85.9752	448.621	81.9708
	448.531	113.989	448.469	111.564	448.494	104.738	447.98	99.356	448.205	95.0789	446.526	89.59	447.991	85.7132	449.621	82.1869
	449.531	114.888	449.469	110.699	449.494	104.375	448.98	99.4905	449.205	94.2291	447.526	89.8074	448.991	84.8049	450.621	82.2474
	450.531	113.829	450.469	110.6	450.494	105.211	449.98	99.7543	450.205	94.9184	448.526	91.2598	449.991	86.7408	451.621	82.8453
	451.531	113.431	451.469	112.224	451.494	105.252	450.98	98.7682	451.205	94.9194	449.526	90.9202	450.991	87.2029	452.621	81.6691
	452.531	113.839	452.469	111.226	452.494	105.298	451.98	98.5622	452.205	93.8912	450.526	90.8171	451.991	85.4525	453.621	81.283
	453.531	113.119	453.469	110.957	453.494	105.876	452.98	99.3576	453.205	94.7306	451.526	90.1124	452.991	85.712	454.621	81.8632
	454.531	113.847	454.469	111.99	454.494	105.138	453.98	99.1677	454.205	96.1744	452.526	91.392	453.991	85.2326	455.621	82.6366
	455.531	114.281	455.469	111.847	455.494	104.767	454.98	99.6784	455.205	94.2269	453.526	90.3823	454.991	85.726	456.621	82.2561
	456.531	114.531	456.469	111.991	456.494	105.352	455.98	100.146	456.205	95.0285	454.526	90.8191	455.991	86.298	457.621	81.6486
	457.531	115.006	457.469	111.27	457.494	106.224	456.98	99.0064	457.205	94.8229	455.526	91.237	456.991	85.5088	458.621	82.3685
	458.531	115.651	458.469	111.743	458.494	106.32	457.98	98.6758	458.205	95.5277	456.526	89.8648	457.991	86.0495	459.621	81.6153
	459.531	114.392	459.469	111.254	459.494	104.873	458.98	99.24	459.205	94.0529	457.526	90.8079	458.991	85.8789	460.621	82.0025
	460.531	114.771	460.469	111.381	460.494	105.409	459.98	99.733	460.205	94.4434	458.526	90.1458	459.991	85.8201	461.621	81.7716
	461.531	114.783	461.469	110.87	461.494	105.613	460.98	100.041	461.205	95.0312	459.526	91.4722	460.991	85.999	462.621	82.1776
	462.531	115.805	462.469	111.977	462.494	104.567	461.98	99.7803	462.205	94.6263	460.526	91.1446	461.991	86.5709	463.621	81.7491
	463.531	115.617	463.469	111.378	463.494	105.552	462.98	99.1394	463.205	95.7634	461.526	90.4566	462.991	86.1114	464.621	82.2412
	464.531	116.096	464.469	111.371	464.494	105.514	463.98	99.9711	464.205	95.2684	462.526	90.5706	463.991	86.2231	465.621	83.275
	465.531	115.122	465.469	111.605	465.494	105.713	464.98	99.4087	465.205	95.1797	463.526	91.1891	464.991	85.7086	466.621	82.2355
	466.531	114.833	466.469	111.444	466.494	105.889	465.98	100.511	466.205	95.6142	464.526	91.1692	465.991	85.716	467.621	81.5529
	467.531	115.035	467.469	112.005	467.494	105.828	466.98	100.217	467.205	95.4162	465.526	90.1683	466.991	86.8529	468.621	81.8049
	468.531	115.785	468.469	113.34	468.494	106.197	467.98	99.6577	468.205	95.3761	466.526	90.4133	467.991	86.2391	469.621	81.5765
	469.531	115.891	469.469	111.857	469.494	105.63	468.98	100.772	469.205	95.934	467.526	90.6941	468.991	86.3179	470.621	81.7674
	470.531	115.783	470.469	110.413	470.494	106.245	469.98	99.8838	470.205	94.8066	468.526	91.0625	469.991	86.1551	471.621	83.0955
	471.531	115.774	471.469	111.962	471.494	106.513	470.98	100.589	471.205	95.9978	469.526	90.3271	470.991	86.0958	472.621	81.5358
	472.531	115.461	472.469	112.915	472.494	105.47	471.98	100.071	472.205	95.3242	470.526	91.0699	471.991	86.2533	473.621	82.5937
	473.531	116.073	473.469	112.001	473.494	105.921	472.98	100.858	473.205	95.7581	471.526	89.6223	472.991	86.2203	474.621	82.3423
	474.531	116.176	474.469	111.923	474.494	106.191	473.98	100.932	474.205	95.2691	472.526	90.2273	473.991	85.929	475.621	82.7917
	475.531	117.016	475.469	113.034	475.494	105.683	474.98	100.573	475.205	95.0463	473.526	91.0446	474.991	86.705	476.621	81.1488
	476.531	115.798	476.469	113.035	476.494	106.33	475.98	99.9854	476.205	95.6593	474.526	91.4083	475.991	86.2816	477.621	82.1473
	477.531	115.775	477.469	112.382	477.494	106.359	476.98	100.766	477.205	95.9918	475.526	91.0439	476.991	86.9575	478.621	82.3963
	478.531	115.673	478.469	112.648	478.494	105.705	477.98	101.56	478.205	95.1063	476.526	92.0842	477.991	86.4434	479.621	81.8275
	479.531	115.377	479.469	113.462	479.494	106.161	478.98	100.644	479.205	96.3197	477.526	91.5855	478.991	85.966	480.621	82.2701
	480.531	115.897	480.469	112.389	480.494	106.516	479.98	100.057	480.205	96.3346	478.526	91.3003	479.991	86.6134	481.621	81.6927
	481.531	115.877	481.469	113.13	481.494	107.146	480.98	100.416	481.205	96.5903	479.526	91.4061	480.991	85.009	482.621	82.672
	482.531	117.344	482.469	113.259	482.494	106.001	481.98	100.619	482.205	95.3613	480.526	91.167	481.991	85.7419	483.621	82.1547
	483.531	115.673	483.469	113.319	483.494	106.13	482.98	100.485	483.205	94.7817	481.526	90.7392	482.991	86.503	484.621	82.3384
	484.531	117.065	484.469	112.589	484.494	106.205	483.98	100.693	484.205	96.1677	482.526	92.0433	483.991	86.7544	485.621	81.8909
	485.531	116.242	485.469	113.476	485.494	106.369	484.98	100.341	485.205	96.0593	483.526	91.8991	484.991	86.3775	486.621	81.9986
	486.531	116.175	486.469	112.998	486.494	106.34	485.98	100.494	486.205	95.7653	484.526	90.5895	485.991	85.6434	487.621	81.5132
	487.531	116.309	487.469	112.125	487.494	106.342	486.98	102.145	487.205	96.1098	485.526	90.7139	486.991	86.8341	488.621	81.8165
	488.531	116.812	488.469	112.393	488.494	107.121	487.98	101.324	488.205	96.0013	486.526	91.037	487.991	86.1168	489.621	82.0697
	489.531	116.725	489.469	113.611	489.494	107.304	488.98	100.742	489.205	97.0244	487.526	90.6994	488.991	85.7514	490.621	81.7676
	490.531	115.973	490.469	112.506	490.494	106.861	489.98	101.779	490.205	95.2453	488.526	90.3217	489.991	85.6989	491.621	82.466
	491.531	116.461	491.469	112.489	491.494	106.165	490.98	100.984	491.205	96.4099	489.526	91.6067	490.991	86.2166	492.621	81.9811
	492.531	116.833	492.469	113.811	492.494	106.238	491.98	100.331	492.205	95.9349	490.526	91.9795	491.991	86.8929	493.621	81.8855
	493.531	117.446	493.469	113.857	493.494	107.16	492.98	101.608	493.205	96.2178	491.526	92.1568	492.991	85.6312	494.621	82.0766
	494.531	116.64	494.469	113.436	494.494	107.041	493.98	100.962	494.205	96.8149	492.526	91.0733	493.991	86.1484	495.621	82.957
	495.531	117.24	495.469	113.916	495.494	107.377	494.98	102.173	495.205	96.9731	493.526	92.5977	494.991	86.2133	496.621	81.771
	496.531	117.659	496.469	113.324	496.494	106.964	495.98	101.778	496.205	95.3893	494.526	92.4178	495.991	86.6574	497.621	81.381
	497.531	117.399	497.469	112.432	497.494	107.574	496.98	100.824	497.205	96.2411	495.526	91.9385	496.991	86.2077	498.621	82.3009
	498.531	117.637	498.469	113.33	498.494	105.923	497.98	101.378	498.205	95.5041	496.526	91.587	497.991	86.0551	499.621	81.5472
	499.531	117.5	499.469	113.491	499.494	107.566	498.98	102.115	499.205	96.3016	497.526	92.0115	498.991	86.4305	500.621	82.0848
	500.531	116.826	500.469	113.543	500.494	106.98	499.98	101.685	500.205	97.2992	498.526	91.5806	499.991	86.1718	501.621	82.009
	501.531	117.726	501.469	114.051	501.494	106.935	500.98	101.783	501.205	96.4622	499.526	91.5743	500.991	86.9315	502.621	81.7929
	502.531	118.575	502.469	114.522	502.494	107.428	501.98	103.218	502.205	95.8778	500.526	92.4347	501.991	86.5321	503.621	81.1855
	503.531	117.643	503.469	113.761	503.494	107.391	502.98	101.2	503.205	97.0677	501.526	90.8781	502.991	87.2933	504.621	81.8833
	504.531	117.424	504.469	114.271	504.494	107.594	503.98	101.921	504.205	96.3618	502.526	92.5376	503.991	86.0128	505.621	81.8122
	505.531	118.067	505.469	114.191	505.494	106.371	504.98	100.735	505.205	96.3048	503.526	92.262	504.991	86.9375	506.621	81.9458
	506.531	117.458	506.469	113.401	506.494	107.331	505.98	102.377	506.205	96.8952	504.526	92.6205	505.991	86.5156	507.621	81.4982
	507.531	117.437	507.469	114.641	507.494	106.674	506.98	102.34	507.205	96.9259	505.526	91.5902	506.991	86.9894	508.621	81.4887
	508.531	118.349	508.469	113.428	508.494	107.634	507.98	101.717	508.205	97.5277	506.526	92.4973	507.991	86.5605	509.621	81.5986
	509.531	118.47	509.469	113.463	509.494	108.136	508.98	102.978	509.205	96.3397	507.526	92.3194	508.991	86.4916	510.621	81.4897
	510.531	117.241	510.469	112.904	510.494	107.177	509.98	102.082	510.205	96.0851	508.526	90.7868	509.991	86.2513	511.621	81.6426
	511.531	117.827	511.469	114.891	511.494	107.601	510.98	102.302	511.205	96.6376	509.526	92.0803	510.991	86.7513	512.621	82.3112
	512.531	119.015	512.469	114.017	512.494	107.506	511.98	102.569	512.205	97.0676	510.526	92.2798	511.991	87.2845	513.621	81.8999
	513.531	117.962	513.469	114.187	513.494	108.324	512.98	101.793	513.205	97.1896	511.526	90.9483	512.991	86.6328	514.621	82.2906
	514.531	118.62	514.469	113.965	514.494	109.048	513.98	101.878	514.205	96.3936	512.526	91.9406	513.991	86.2785	515.621	81.4996
	515.531	117.811	515.469	113.983	515.494	108.758	514.98	102.315	515.205	96.2302	513.526	92.5266	514.991	86.7887	516.621	83.1905
	516.531	117.412	516.469	114.279	516.494	107.147	515.98	102.308	516.205	97.0618	514.526	92.2559	515.991	87.1411	517.621	81.7533
	517.531	118.36	517.469	114.366	517.494	107.725	516.98	101.771	517.205	97.8263	515.526	91.6767	516.991	86.9901	518.621	82.2956
	518.531	118.538	518.469	115.143	518.494	108.238	517.98	102.201	518.205	97.2531	516.526	92.4719	517.991	86.8577	519.621	82.2216
	519.531	118.023	519.469	114.793	519.494	108.019	518.98	102.456	519.205	97.2578	517.526	92.207	518.991	86.3307	520.621	81.2613
	520.531	118.928	520.469	114.014	520.494	107.531	519.98	103.215	520.205	97.4978	518.526	92.608	519.991	86.5518	521.621	81.8797
	521.531	118.899	521.469	113.827	521.494	108.396	520.98	103.152	521.205	97.4578	519.526	91.9121	520.991	87.2792	522.621	82.4164
	522.531	118.796	522.469	113.502	522.494	106.789	521.98	102.221	522.205	98.0095	520.526	90.8694	521.991	86.8017	523.621	82.5318
	523.531	117.194	523.469	114.925	523.494	108.119	522.98	103.003	523.205	96.9221	521.526	92.5056	522.991	86.9844	524.621	80.9128
	524.531	118.504	524.469	115.546	524.494	108.427	523.98	104.148	524.205	97.2043	522.526	92.834	523.991	86.6798	525.621	81.8981
	525.531	118.715	525.469	115.054	525.494	108.114	524.98	102.195	525.205	96.6473	523.526	92.5228	524.991	86.68	526.621	81.6748
	526.531	118.533	526.469	114.143	526.494	107.994	525.98	103.832	526.205	97.6749	524.526	92.2361	525.991	87.195	527.621	81.6074
	527.531	118.42	527.469	115.365	527.494	108.3	526.98	103.049	527.205	98.5966	525.526	92.3821	526.991	86.4104	528.621	81.8289
	528.531	117.676	528.469	115.898	528.494	108.203	527.98	102.552	528.205	96.9313	526.526	91.9016	527.991	87.5125	529.621	82.1919
	529.531	119.593	529.469	114.57	529.494	108.602	528.98	104.666	529.205	97.3427	527.526	91.9897	528.991	86.4994	530.621	82.9196
	530.531	120.018	530.469	114.569	530.494	109.303	529.98	103.456	530.205	97.4008	528.526	92.379	529.991	87.3983	531.621	82.0088
	531.531	119.217	531.469	115	531.494	107.709	530.98	102.755	531.205	97.5482	529.526	92.284	530.991	86.7691	532.621	82.186
	532.531	119.226	532.469	116.003	532.494	107.401	531.98	103.977	532.205	98.1663	530.526	91.7752	531.991	87.2474	533.621	82.2279
	533.531	118.387	533.469	114.629	533.494	108.933	532.98	104.255	533.205	98.0016	531.526	92.4314	532.991	87.2778	534.621	81.527
	534.531	119.33	534.469	115.38	534.494	108.14	533.98	102.666	534.205	97.5411	532.526	92.3315	533.991	86.9907	535.621	82.7545
	535.531	119.406	535.469	114.966	535.494	109.586	534.98	103.281	535.205	97.726	533.526	93.0604	534.991	86.9581	536.621	82.1192
	536.531	119.073	536.469	114.787	536.494	108.436	535.98	103.313	536.205	98.1885	534.526	92.2996	535.991	86.9948	537.621	82.5678
	537.531	118.765	537.469	115.036	537.494	109.428	536.98	103.134	537.205	98.3834	535.526	92.1845	536.991	87.122	538.621	81.9138
	538.531	119.762	538.469	115.977	538.494	108.4	537.98	104.073	538.205	98.4551	536.526	92.6909	537.991	87.1741	539.621	82.2436
	539.531	120.451	539.469	114.024	539.494	108.911	538.98	104.17	539.205	98.3366	537.526	92.1541	538.991	86.8135	540.621	82.2056
	540.531	119.217	540.469	115.906	540.494	109.34	539.98	102.648	540.205	99.0012	538.526	91.6815	539.991	87.0109	541.621	81.4132
	541.531	119.632	541.469	114.997	541.494	109.331	540.98	102.8	541.205	97.5454	539.526	92.2627	540.991	87.6804	542.621	81.0567
	542.531	119.207	542.469	114.57	542.494	108.618	541.98	104.553	542.205	98.1694	540.526	92.6098	541.991	86.5996	543.621	81.5931
	543.531	119.338	543.469	115.016	543.494	109.543	542.98	103.049	543.205	98.985	541.526	92.9734	542.991	86.7656	544.621	82.1601
	544.531	120.462	544.469	117.014	544.494	110.321	543.98	105.308	544.205	98.9342	542.526	93.3146	543.991	87.4876	545.621	82.1521
	545.531	120.42	545.469	114.72	545.494	109.43	544.98	103.552	545.205	97.0369	543.526	93.4337	544.991	86.6572	546.621	81.5094
	546.531	119.813	546.469	115.576	546.494	107.894	545.98	105.615	546.205	98.4012	544.526	92.4055	545.991	86.9732	547.621	81.7661
	547.531	120.382	547.469	115.77	547.494	109.942	546.98	104.777	547.205	98.724	545.526	92.8523	546.991	86.6862	548.621	82.3543
	548.531	120.499	548.469	115.756	548.494	109.837	547.98	103.226	548.205	99.1859	546.526	93.0796	547.991	86.0474	549.621	82.243
	549.531	120.642	549.469	115.394	549.494	109.291	548.98	103.282	549.205	98.2879	547.526	93.2131	548.991	86.3714	550.621	82.4516
	550.531	120.101	550.469	114.779	550.494	109.69	549.98	103.624	550.205	97.9134	548.526	92.7755	549.991	86.3517	551.621	81.2414
	551.531	119.732	551.469	116.264	551.494	109.717	550.98	103.269	551.205	98.6463	549.526	92.9401	550.991	87.234	552.621	81.8488
	552.531	119.927	552.469	115.759	552.494	109.24	551.98	104.26	552.205	99.1491	550.526	92.5509	551.991	87.5092	553.621	81.7513
	553.531	120.179	553.469	116.65	553.494	110.056	552.98	104.299	553.205	98.6809	551.526	92.3912	552.991	86.787	554.621	82.2702
	554.531	119.596	554.469	116.945	554.494	110.184	553.98	104.693	554.205	99.0244	552.526	93.2983	553.991	86.8246	555.621	81.0424
	555.531	119.576	555.469	115.362	555.494	110.545	554.98	104.952	555.205	99.6082	553.526	92.4324	554.991	86.7675	556.621	81.5264
	556.531	120.379	556.469	116.606	556.494	109.929	555.98	104.392	556.205	98.4356	554.526	93.0726	555.991	87.8102	557.621	82.4527
	557.531	121.157	557.469	116.697	557.494	110.32	556.98	103.82	557.205	98.669	555.526	92.9956	556.991	86.1929	558.621	82.2542
	558.531	120.43	558.469	116.322	558.494	109.507	557.98	105.185	558.205	98.7817	556.526	93.1112	557.991	87.0649	559.621	82.7812
	559.531	120.167	559.469	115.659	559.494	109.562	558.98	103.736	559.205	99.4102	557.526	93.9792	558.991	88.6672	560.621	82.3581
	560.531	121.069	560.469	116.011	560.494	110.37	559.98	104.455	560.205	99.2352	558.526	92.9269	559.991	87.9506	561.621	80.7067
	561.531	119.981	561.469	117.206	561.494	110.169	560.98	104.447	561.205	98.6934	559.526	92.8548	560.991	86.8498	562.621	82.7797
	562.531	120.877	562.469	116.46	562.494	109.818	561.98	104.083	562.205	98.4814	560.526	92.9409	561.991	87.3735	563.621	81.2613
	563.531	120.765	563.469	115.966	563.494	109.425	562.98	104.021	563.205	99.5234	561.526	92.5778	562.991	87.3277	564.621	81.5533
	564.531	121.464	564.469	116.454	564.494	108.884	563.98	104.092	564.205	97.677	562.526	93.423	563.991	87.3501	565.621	81.5378
	565.531	121.871	565.469	116.451	565.494	110.174	564.98	104.346	565.205	98.6735	563.526	92.691	564.991	86.3419	566.621	81.6645
	566.531	121.048	566.469	117.566	566.494	110.449	565.98	103.611	566.205	98.9379	564.526	93.0878	565.991	85.8663	567.621	81.6423
	567.531	121.196	567.469	116.536	567.494	110.101	566.98	104.997	567.205	98.8395	565.526	93.5042	566.991	87.5461	568.621	81.7077
	568.531	121.637	568.469	117.866	568.494	109.749	567.98	105.14	568.205	98.7348	566.526	92.2848	567.991	86.8995	569.621	81.8326
	569.531	120.462	569.469	116.433	569.494	109.91	568.98	104.393	569.205	98.9774	567.526	93.5793	568.991	86.4039	570.621	83.2628
	570.531	121.38	570.469	116.816	570.494	109.325	569.98	105.4	570.205	99.6047	568.526	93.1574	569.991	86.552	571.621	82.1784
	571.531	120.722	571.469	118.555	571.494	110.741	570.98	105.587	571.205	99.755	569.526	93.1761	570.991	86.8834	572.621	82.2908
	572.531	120.913	572.469	117.792	572.494	110.055	571.98	103.343	572.205	98.6356	570.526	91.9188	571.991	86.6875	573.621	81.2182
	573.531	120.985	573.469	116.367	573.494	110.317	572.98	104.594	573.205	98.5838	571.526	93.7112	572.991	87.6082	574.621	81.1661
	574.531	121.521	574.469	117.536	574.494	110.934	573.98	105.109	574.205	98.2117	572.526	93.1057	573.991	87.4808	575.621	82.767
	575.531	120.945	575.469	116.832	575.494	110.917	574.98	105.485	575.205	99.4624	573.526	93.2157	574.991	87.6528	576.621	81.8213
	576.531	121.406	576.469	117.879	576.494	110.977	575.98	104.153	576.205	100.398	574.526	93.6132	575.991	87.0221	577.621	81.8914
	577.531	121.705	577.469	117.837	577.494	110.77	576.98	105.111	577.205	98.9542	575.526	93.2898	576.991	87.5444	578.621	81.9421
	578.531	121.422	578.469	117.691	578.494	110.605	577.98	105.453	578.205	99.0868	576.526	93.5146	577.991	86.7796	579.621	81.1504
	579.531	121.653	579.469	118.64	579.494	111.299	578.98	105.327	579.205	99.1365	577.526	92.7329	578.991	87.9527	580.621	82.7234
	580.531	121.357	580.469	118.33	580.494	110.059	579.98	104.6	580.205	99.5864	578.526	92.6047	579.991	87.5549	581.621	81.5061
	581.531	121.329	581.469	118.071	581.494	110.321	580.98	105.389	581.205	99.9456	579.526	92.6861	580.991	87.1625	582.621	81.9239
	582.531	122.586	582.469	118.064	582.494	111.042	581.98	105.904	582.205	98.6589	580.526	93.5527	581.991	87.4953	583.621	81.4642
	583.531	120.812	583.469	117.011	583.494	111.436	582.98	104.958	583.205	98.4885	581.526	93.0567	582.991	86.9817	584.621	81.8263
	584.531	123.147	584.469	117.687	584.494	111.804	583.98	105.598	584.205	100.13	582.526	93.6205	583.991	87.3939	585.621	82.0033
	585.531	123.004	585.469	117.916	585.494	110.942	584.98	104.821	585.205	100.067	583.526	93.1283	584.991	87.7857	586.621	81.9251
	586.531	123.423	586.469	118.025	586.494	111.276	585.98	104.784	586.205	100.122	584.526	93.6593	585.991	87.6454	587.621	81.1064
	587.531	122.135	587.469	118.057	587.494	110.394	586.98	106.908	587.205	99.2538	585.526	92.7799	586.991	87.1609	588.621	83.0913
	588.531	121.846	588.469	117.398	588.494	112.019	587.98	105.062	588.205	99.1707	586.526	93.3414	587.991	87.389	589.621	82.033
	589.531	121.709	589.469	118.063	589.494	110.941	588.98	106.134	589.205	98.7703	587.526	93.5276	588.991	87.0412	590.621	81.9855
	590.531	122.445	590.469	117.835	590.494	110.82	589.98	106.015	590.205	100.186	588.526	92.7028	589.991	87.3899	591.621	82.7038
	591.531	122.53	591.469	117.784	591.494	110.617	590.98	105.952	591.205	100.062	589.526	94.5026	590.991	87.0607	592.621	81.3983
	592.531	123.402	592.469	117.745	592.494	111.641	591.98	105.626	592.205	100.456	590.526	93.173	591.991	88.0613	593.621	81.9008
	593.531	121.918	593.469	117.975	593.494	110.784	592.98	106.333	593.205	100.422	591.526	93.6693	592.991	88.372	594.621	82.2073
	594.531	123.532	594.469	119.01	594.494	110.505	593.98	105.941	594.205	100.009	592.526	93.1526	593.991	87.5883	595.621	82.0267
	595.531	122.867	595.469	118.859	595.494	112.095	594.98	107.119	595.205	99.7389	593.526	93.1245	594.991	86.9463	596.621	82.2723
	596.531	121.809	596.469	119.672	596.494	111.991	595.98	105.531	596.205	100.812	594.526	93.6787	595.991	87.061	597.621	81.6611
	597.531	123.221	597.469	118.455	597.494	111.059	596.98	106.605	597.205	99.6521	595.526	92.8463	596.991	87.3926	598.621	81.6454
	598.531	123.897	598.469	119.124	598.494	111.414	597.98	105.637	598.205	99.6389	596.526	92.8657	597.991	87.9619	599.621	81.7813
	599.531	123.816	599.469	120.02	599.494	112.47	598.98	105.16	599.205	99.2754	597.526	93.2307	598.991	87.6902	600.621	82.2808
	600.531	123.156	600.469	118.209	600.494	111.162	599.98	105.868	600.205	99.6939	598.526	94.1803	599.991	88.1355	601.621	81.5131
	601.531	122.601	601.469	118.685	601.494	111.495	600.98	105.712	601.205	101.07	599.526	92.8763	600.991	86.7867	602.621	82.183
	602.531	121.793	602.469	119.25	602.494	111.818	601.98	106.038	602.205	100.064	600.526	93.0635	601.991	87.6236	603.621	81.6016
	603.531	123.321	603.469	119.282	603.494	111.932	602.98	107.49	603.205	100.212	601.526	93.3946	602.991	87.9971	604.621	81.3351
	604.531	122.503	604.469	118.318	604.494	111.824	603.98	106.42	604.205	99.8258	602.526	93.1995	603.991	87.0441	605.621	82.8104
	605.531	121.979	605.469	119.553	605.494	111.993	604.98	106.336	605.205	99.3019	603.526	94.2005	604.991	87.3038	606.621	82.5381
	606.531	122.917	606.469	119.813	606.494	111.782	605.98	106.336	606.205	100.555	604.526	93.9743	605.991	87.3297	607.621	82.0776
	607.531	123.244	607.469	119.101	607.494	111.359	606.98	107.068	607.205	100.23	605.526	93.5428	606.991	87.4086	608.621	81.5103
	608.531	123.008	608.469	119.453	608.494	111.652	607.98	105.99	608.205	100.371	606.526	94.5009	607.991	87.6225	609.621	82.158
	609.531	123.185	609.469	119.451	609.494	112.258	608.98	105.726	609.205	100.582	607.526	93.9916	608.991	86.5731	610.621	81.9522
	610.531	123.905	610.469	118.535	610.494	112.857	609.98	107.022	610.205	100.267	608.526	93.2955	609.991	87.6694	611.621	82.0161
	611.531	123.26	611.469	119.279	611.494	112.638	610.98	106.491	611.205	101.373	609.526	93.9349	610.991	87.7594	612.621	81.3434
	612.531	124.082	612.469	119.556	612.494	111.963	611.98	107.316	612.205	100.428	610.526	93.7504	611.991	87.9448	613.621	82.607
	613.531	123.07	613.469	119.902	613.494	112.103	612.98	107.101	613.205	100.222	611.526	93.496	612.991	87.2204	614.621	81.6123
	614.531	124.224	614.469	118.862	614.494	112.322	613.98	106.608	614.205	100.842	612.526	93.7534	613.991	87.8645	615.621	82.5156
	615.531	123.207	615.469	119.722	615.494	111.651	614.98	106.685	615.205	100.212	613.526	93.7479	614.991	86.9843	616.621	81.8947
	616.531	123.118	616.469	118.666	616.494	112.325	615.98	106.796	616.205	100.194	614.526	94.2463	615.991	86.7508	617.621	81.3679
	617.531	123.356	617.469	118.794	617.494	113.174	616.98	107.376	617.205	101.117	615.526	93.6993	616.991	87.3664	618.621	81.6836
	618.531	123.963	618.469	120.099	618.494	112.39	617.98	106.607	618.205	100.709	616.526	95.039	617.991	86.8245	619.621	82.8235
	619.531	122.988	619.469	119.812	619.494	111.474	618.98	107.165	619.205	100.099	617.526	94.4727	618.991	86.9201	620.621	82.1645
	620.531	124.31	620.469	120.207	620.494	112.291	619.98	106.77	620.205	101.916	618.526	94.1721	619.991	87.9738	621.621	81.5705
	621.531	123.406	621.469	119.717	621.494	112.61	620.98	107.25	621.205	102.146	619.526	93.6131	620.991	86.6383	622.621	81.468
	622.531	124.151	622.469	121.062	622.494	113.222	621.98	106.875	622.205	101.123	620.526	94.2572	621.991	87.5017	623.621	82.3886
	623.531	124.758	623.469	119.687	623.494	114.302	622.98	107.113	623.205	100.982	621.526	93.8683	622.991	88.0842	624.621	81.8054
	624.531	123.739	624.469	120.655	624.494	112.183	623.98	106.642	624.205	100.699	622.526	94.623	623.991	87.9771	625.621	81.5936
	625.531	124.641	625.469	118.174	625.494	112.626	624.98	107.404	625.205	100.762	623.526	94.5132	624.991	87.8603	626.621	81.9134
	626.531	124.59	626.469	121.102	626.494	112.634	625.98	107.426	626.205	100.64	624.526	93.8293	625.991	87.569	627.621	81.6423
	627.531	124.183	627.469	118.955	627.494	112.469	626.98	107.003	627.205	100.274	625.526	93.8876	626.991	87.9326	628.621	81.3019
	628.531	124.543	628.469	119.309	628.494	112.203	627.98	107.332	628.205	100.832	626.526	93.6054	627.991	87.129	629.621	81.5181
	629.531	123.158	629.469	119.709	629.494	113.1	628.98	107.262	629.205	99.9748	627.526	94.0021	628.991	87.4798	630.621	81.8807
	630.531	124.531	630.469	118.937	630.494	112.655	629.98	107.715	630.205	101.239	628.526	93.9808	629.991	87.4466	631.621	81.8874
	631.531	124.135	631.469	120.806	631.494	112.208	630.98	107.554	631.205	101.329	629.526	93.7426	630.991	87.8893	632.621	81.9777
	632.531	124.545	632.469	120.53	632.494	113.391	631.98	107.483	632.205	101.652	630.526	93.8871	631.991	87.4004	633.621	81.6924
	633.531	123.996	633.469	121.083	633.494	112.53	632.98	106.917	633.205	101.79	631.526	93.6756	632.991	87.3143	634.621	81.9692
	634.531	124.798	634.469	119.943	634.494	112.963	633.98	108.079	634.205	101.028	632.526	94.2308	633.991	88.1358	635.621	81.8025
	635.531	123.682	635.469	121.121	635.494	113.493	634.98	107.834	635.205	101.145	633.526	93.8462	634.991	87.1806	636.621	82.3439
	636.531	123.831	636.469	119.575	636.494	113.093	635.98	108.828	636.205	100.414	634.526	94.2521	635.991	86.6477	637.621	81.0336
	637.531	124.536	637.469	119.73	637.494	112.61	636.98	107.61	637.205	101.507	635.526	94.1698	636.991	87.782	638.621	81.8168
	638.531	125.289	638.469	118.791	638.494	112.816	637.98	106.862	638.205	100.632	636.526	93.6326	637.991	87.6686	639.621	82.3217
	639.531	123.435	639.469	120.63	639.494	113.584	638.98	106.92	639.205	101.067	637.526	94.4972	638.991	86.8475	640.621	81.6705
	640.531	124.656	640.469	120.266	640.494	114.881	639.98	107.549	640.205	101.342	638.526	94.2294	639.991	88.0688	641.621	81.2281
	641.531	125.1	641.469	120.387	641.494	114.131	640.98	107.811	641.205	101.403	639.526	94.0785	640.991	88.1022	642.621	82.0398
	642.531	124.171	642.469	119.986	642.494	112.28	641.98	108.784	642.205	100.755	640.526	94.1564	641.991	87.6761	643.621	82.2358
	643.531	123.391	643.469	120.387	643.494	113.779	642.98	106.896	643.205	101.367	641.526	94.1217	642.991	87.5275	644.621	81.9542
	644.531	124.949	644.469	121.353	644.494	112.881	643.98	107.816	644.205	100.007	642.526	93.9344	643.991	88.0942	645.621	82.113
	645.531	124.562	645.469	121.465	645.494	113.289	644.98	108.529	645.205	101.682	643.526	93.6383	644.991	88.0537	646.621	81.4639
	646.531	125.497	646.469	119.79	646.494	113.908	645.98	108.461	646.205	101.447	644.526	94.5391	645.991	87.8458	647.621	81.6405
	647.531	124.374	647.469	120.751	647.494	112.828	646.98	107.823	647.205	101.468	645.526	93.8602	646.991	88.0899	648.621	82.4894
	648.531	125.053	648.469	120.732	648.494	114.181	647.98	108.375	648.205	101.285	646.526	94.2828	647.991	87.2722	649.621	82.4049
	649.531	125.061	649.469	120.756	649.494	113.952	648.98	108.825	649.205	101.614	647.526	94.7603	648.991	86.4769	650.621	82.0814
	650.531	125.843	650.469	120.918	650.494	112.671	649.98	108.16	650.205	102.328	648.526	93.6867	649.991	88.1164	651.621	82.1405
	651.531	124.652	651.469	120.329	651.494	114.246	650.98	107.722	651.205	101.793	649.526	94.6304	650.991	87.8817	652.621	80.547
	652.531	125.781	652.469	119.94	652.494	114.345	651.98	108.483	652.205	101.334	650.526	94.6971	651.991	88.1698	653.621	81.3811
	653.531	125.784	653.469	121.073	653.494	113.637	652.98	108.454	653.205	102.489	651.526	94.8874	652.991	88.5188	654.621	81.6834
	654.531	125.227	654.469	121.886	654.494	114.793	653.98	108.83	654.205	101.672	652.526	94.4053	653.991	88.0731	655.621	82.3905
	655.531	125.729	655.469	121.848	655.494	113.623	654.98	107.476	655.205	101.579	653.526	94.7051	654.991	87.4355	656.621	81.8911
	656.531	125.436	656.469	121.263	656.494	113.571	655.98	108.202	656.205	101.678	654.526	94.4319	655.991	87.3636	657.621	81.8793
	657.531	125.783	657.469	121.291	657.494	114.67	656.98	108.261	657.205	101.288	655.526	94.734	656.991	87.3858	658.621	81.439
	658.531	125.774	658.469	121.365	658.494	114.486	657.98	108.007	658.205	101.27	656.526	94.1182	657.991	88.382	659.621	82.4234
	659.531	125.757	659.469	120.995	659.494	114.17	658.98	108.771	659.205	101.632	657.526	94.764	658.991	87.8955	660.621	81.3885
	660.531	125.23	660.469	121.745	660.494	113.923	659.98	108.711	660.205	101.712	658.526	94.6786	659.991	87.145	661.621	81.8959
	661.531	126.29	661.469	120.707	661.494	114.736	660.98	109.359	661.205	102.112	659.526	94.7353	660.991	87.7296	662.621	81.8724
	662.531	126.395	662.469	121.766	662.494	113.777	661.98	109.077	662.205	102.145	660.526	95.2079	661.991	88.0815	663.621	81.5574
	663.531	125.79	663.469	120.206	663.494	114.1	662.98	108.087	663.205	101.089	661.526	94.0004	662.991	88.6604	664.621	81.8242
	664.531	126.098	664.469	120.949	664.494	113.717	663.98	108.409	664.205	101.556	662.526	93.373	663.991	87.6174	665.621	82.038
	665.531	126.291	665.469	121.913	665.494	114.217	664.98	108.984	665.205	101.478	663.526	95.2774	664.991	87.9538	666.621	81.486
	666.531	125.38	666.469	120.257	666.494	114.094	665.98	108.262	666.205	102.799	664.526	94.7145	665.991	87.941	667.621	81.7862
	667.531	127.017	667.469	119.887	667.494	114.702	666.98	109.019	667.205	102.28	665.526	94.9035	666.991	87.8907	668.621	81.6134
	668.531	126.449	668.469	121.682	668.494	113.428	667.98	109.077	668.205	101.157	666.526	94.63	667.991	89.3674	669.621	82.2161
	669.531	126.32	669.469	122.007	669.494	115.176	668.98	109.514	669.205	102.602	667.526	94.7823	668.991	86.9892	670.621	82.012
	670.531	126.651	670.469	122.772	670.494	114.146	669.98	109.024	670.205	101.398	668.526	95.4873	669.991	87.5148	671.621	81.3986
	671.531	126.561	671.469	122.005	671.494	114.637	670.98	109.14	671.205	101.439	669.526	95.0361	670.991	88.0136	672.621	81.3433
	672.531	126.066	672.469	122.2	672.494	114.083	671.98	107.958	672.205	102.248	670.526	94.2565	671.991	87.624	673.621	81.7665
	673.531	125.847	673.469	120.879	673.494	114.488	672.98	108.885	673.205	101.657	671.526	94.5291	672.991	87.9932	674.621	81.4059
	674.531	125.899	674.469	121.517	674.494	114.633	673.98	109.255	674.205	101.768	672.526	95.287	673.991	88.2844	675.621	81.1871
	675.531	125.785	675.469	122.796	675.494	114.523	674.98	108.74	675.205	102.405	673.526	94.2756	674.991	88.1514	676.621	81.9755
	676.531	126.023	676.469	122.362	676.494	114.286	675.98	109.138	676.205	103.16	674.526	93.858	675.991	88.1328	677.621	80.8886
	677.531	126.251	677.469	121.914	677.494	113.71	676.98	108.224	677.205	102.344	675.526	95.2205	676.991	87.907	678.621	80.9626
	678.531	126.332	678.469	122.186	678.494	114.379	677.98	108.403	678.205	102.701	676.526	94.763	677.991	87.5479	679.621	81.0631
	679.531	127.288	679.469	121.572	679.494	115.572	678.98	109.833	679.205	101.711	677.526	95.0143	678.991	87.2086	680.621	83.0028
	680.531	126.627	680.469	122.511	680.494	114.891	679.98	109.24	680.205	102.415	678.526	95.4953	679.991	88.0877	681.621	81.4325
	681.531	126.293	681.469	122.153	681.494	115.165	680.98	109.325	681.205	100.415	679.526	94.8474	680.991	88.1568	682.621	81.4404
	682.531	127.557	682.469	123.084	682.494	113.225	681.98	109.151	682.205	102.866	680.526	95.9708	681.991	89.0702	683.621	81.6351
	683.531	125.44	683.469	122.018	683.494	114.449	682.98	108.866	683.205	102.366	681.526	95.1017	682.991	87.7289	684.621	81.1498
	684.531	125.655	684.469	122.828	684.494	115.016	683.98	109.24	684.205	101.823	682.526	95.3093	683.991	88.3044	685.621	82.5593
	685.531	126.861	685.469	121.576	685.494	114.559	684.98	109.917	685.205	102.498	683.526	94.9536	684.991	88.154	686.621	80.8478
	686.531	125.931	686.469	122.329	686.494	115.947	685.98	109.927	686.205	102.198	684.526	94.4724	685.991	87.0232	687.621	81.5984
	687.531	126.078	687.469	123.316	687.494	115.226	686.98	109.093	687.205	102.151	685.526	94.8175	686.991	87.5403	688.621	81.6725
	688.531	125.882	688.469	122.392	688.494	115.662	687.98	109.177	688.205	102.816	686.526	94.9402	687.991	88.6394	689.621	81.6978
	689.531	127.139	689.469	122.049	689.494	115.813	688.98	108.965	689.205	102.552	687.526	95.0234	688.991	87.6771	690.621	81.4569
	690.531	127.47	690.469	121.982	690.494	116.135	689.98	110.625	690.205	102.26	688.526	95.6269	689.991	87.8958	691.621	81.1151
	691.531	127.403	691.469	122.188	691.494	114.754	690.98	109.574	691.205	101.763	689.526	95.5802	690.991	87.7029	692.621	80.6293
	692.531	125.958	692.469	122.659	692.494	115.348	691.98	110.397	692.205	102.132	690.526	94.9303	691.991	89.1269	693.621	82.038
	693.531	127.856	693.469	122.42	693.494	115.521	692.98	110.956	693.205	102.91	691.526	96.5616	692.991	87.3712	694.621	81.4815
	694.531	126.968	694.469	122.855	694.494	115.86	693.98	109.253	694.205	102.573	692.526	94.7636	693.991	88.4999	695.621	81.7712
	695.531	126.872	695.469	121.335	695.494	115.772	694.98	109.719	695.205	102.283	693.526	95.47	694.991	89.1287	696.621	81.8453
	696.531	126.575	696.469	121.5	696.494	115.832	695.98	109.633	696.205	101.654	694.526	94.7484	695.991	88.56	697.621	81.32
	697.531	126.105	697.469	123.265	697.494	116.084	696.98	110.541	697.205	103.672	695.526	94.5877	696.991	87.9203	698.621	81.6172
	698.531	127.499	698.469	122.345	698.494	114.933	697.98	111.06	698.205	103.244	696.526	94.5186	697.991	88.4709	699.621	81.2284
	699.531	127.662	699.469	122.82	699.494	115.253	698.98	109.168	699.205	102.411	697.526	95.7947	698.991	87.9513	700.621	81.398
	700.531	127.746	700.469	122.259	700.494	115.099	699.98	110.912	700.205	103.064	698.526	95.8531	699.991	87.2877	701.621	81.7713
	701.531	126.691	701.469	123.068	701.494	115.33	700.98	109.499	701.205	102.599	699.526	94.5327	700.991	88.8189	702.621	81.4673
	702.531	127.302	702.469	123.377	702.494	116.423	701.98	110.421	702.205	103.302	700.526	95.5839	701.991	88.6695	703.621	82.9711
	703.531	127.065	703.469	123.202	703.494	115.135	702.98	109.555	703.205	102.836	701.526	95.3726	702.991	87.9028	704.621	81.1904
	704.531	127.249	704.469	122.313	704.494	115.991	703.98	110.242	704.205	102.599	702.526	95.4785	703.991	89.4192	705.621	81.7778
	705.531	127.953	705.469	124.33	705.494	116.795	704.98	109.429	705.205	102.874	703.526	95.1112	704.991	87.5955	706.621	81.3837
	706.531	128.613	706.469	123.446	706.494	116.775	705.98	111.347	706.205	103.587	704.526	95.6132	705.991	88.3913	707.621	81.1188
	707.531	128.134	707.469	123.048	707.494	115.015	706.98	109.228	707.205	102.872	705.526	95.0636	706.991	88.1022	708.621	81.9204
	708.531	128.494	708.469	122.924	708.494	116.311	707.98	110.786	708.205	102.516	706.526	94.4098	707.991	88.3714	709.621	81.5705
	709.531	127.539	709.469	123.107	709.494	116.456	708.98	110.073	709.205	103.998	707.526	95.2383	708.991	87.5516	710.621	81.0342
[truncated: 532 more rows]
