# Supplementary material for: Structures of RecBCD in complex with phage-encoded inhibitor proteins reveal distinctive strategies for evasion of a bacterial immunity hub
Source: eLife journal article supplement (doi:10.7554/elife.83409), 2022-12-19
Supplement: supp [file DNA unwinding assay fSSB untagged gp5.9 RAW DATA.xlsx]

## Sheet: Repeat 1
gp5.9:	Control		100pM		500pM		1nM		2nM		5nM		10nM		20nM		100nM
	Time (s)	Fluoro	Time (s)	Fluoro	Time (s)	Fluoro	Time (s)	Fluoro	Time (s)	Fluoro	Time (s)	Fluoro	Time (s)	Fluoro	Time (s)	Fluoro	Time (s)	Fluoro
	0.5	91.5242	0.5	90.0504	0.5	91.7574	0.5	87.6366	0.5	93.0351	0.5	86.9836	0.5	84.9217	0.5	86.5409	0.5	73.6063
	1.5	91.8407	1.5	90.8093	1.5	92.798	1.5	87.6006	1.5	92.8556	1.5	88.1869	1.5	85.3211	1.5	88.4236	1.5	74.5111
	2.5	93.6057	2.5	90.3277	2.5	92.7648	2.5	87.658	2.5	93.0019	2.5	87.5436	2.5	84.6181	2.5	87.3875	2.5	74.3884
	3.5	93.7608	3.5	91.1977	3.5	92.0554	3.5	87.7167	3.5	92.5145	3.5	87.5825	3.5	86.0667	3.5	89.0658	3.5	73.9949
	4.5	93.2414	4.5	91.3994	4.5	91.8871	4.5	87.4305	4.5	92.9338	4.5	87.4031	4.5	85.6771	4.5	88.3854	4.5	74.1501
	5.5	93.3231	5.5	91.5232	5.5	92.1956	5.5	88.06	5.5	92.186	5.5	87.674	5.5	86.535	5.5	87.8986	5.5	74.3621
	6.5	92.9518	6.5	91.2217	6.5	92.9471	6.5	87.8447	6.5	93.588	6.5	88.0968	6.5	85.9174	6.5	87.4819	6.5	74.265
	7.5	93.2437	7.5	91.0535	7.5	92.5506	7.5	87.3311	7.5	92.3841	7.5	87.4415	7.5	85.9849	7.5	88.0061	7.5	74.3449
	8.5	93.2656	8.5	91.7047	8.5	93.5294	8.5	87.9636	8.5	92.7992	8.5	87.8832	8.5	86.7219	8.5	87.2535	8.5	73.3621
	9.5	92.9001	9.5	91.5436	9.5	93.1562	9.5	87.4627	9.5	92.8174	9.5	87.744	9.5	86.5942	9.5	88.2289	9.5	74.0615
	10.5	92.7626	10.5	90.2204	10.5	93.0673	10.5	87.7537	10.5	92.8201	10.5	87.0418	10.5	85.4908	10.5	88.0352	10.5	74.9118
	11.5	93.2618	11.5	92.1138	11.5	92.7893	11.5	88.109	11.5	93.1105	11.5	86.3229	11.5	85.9345	11.5	88.271	11.5	75.1933
	12.5	93.9841	12.5	90.8172	12.5	92.5746	12.5	88.1049	12.5	93.4152	12.5	86.7791	12.5	86.0961	12.5	88.9779	12.5	74.5755
	13.5	93.6352	13.5	90.8657	13.5	93.4279	13.5	87.6191	13.5	92.2884	13.5	87.0997	13.5	86.5991	13.5	88.5473	13.5	74.5473
	14.5	92.7085	14.5	91.1325	14.5	91.7757	14.5	88.0812	14.5	93.3738	14.5	88.4015	14.5	86.1956	14.5	87.8223	14.5	73.9496
	15.5	93.8617	15.5	91.0071	15.5	93.0579	15.5	88.5875	15.5	92.6364	15.5	88.0566	15.5	85.6046	15.5	87.8177	15.5	74.1336
	16.5	93.7002	16.5	91.1354	16.5	92.6389	16.5	88.2907	16.5	91.9928	16.5	87.3477	16.5	85.8264	16.5	87.5526	16.5	74.8819
	17.5	94.0506	17.5	91.608	17.5	92.5051	17.5	87.8749	17.5	92.5157	17.5	87.2207	17.5	86.477	17.5	87.6719	17.5	75.24
	18.5	93.1266	18.5	91.3552	18.5	93.3738	18.5	87.9822	18.5	93.9399	18.5	87.1833	18.5	85.8645	18.5	89.162	18.5	74.4604
	19.5	92.9052	19.5	90.5371	19.5	92.8242	19.5	87.8155	19.5	93.0999	19.5	87.6699	19.5	85.849	19.5	87.9049	19.5	74.0208
	20.5	93.0622	20.5	92.3423	20.5	93.4094	20.5	87.5507	20.5	92.5075	20.5	87.168	20.5	85.7838	20.5	87.8227	20.5	75.1474
	21.5	92.9379	21.5	91.4072	21.5	93.1846	21.5	88.265	21.5	92.0983	21.5	87.7064	21.5	86.0219	21.5	87.9264	21.5	75.247
	22.5	92.4188	22.5	91.5311	22.5	93.0071	22.5	87.3159	22.5	93.6179	22.5	87.8474	22.5	85.8784	22.5	88.205	22.5	74.5416
	23.5	93.7389	23.5	92.149	23.5	91.7814	23.5	88.0666	23.5	92.9827	23.5	87.3534	23.5	86.239	23.5	87.4497	23.5	74.9067
	24.5	93.8866	24.5	90.799	24.5	93.199	24.5	87.8188	24.5	93.4081	24.5	86.6901	24.5	85.9294	24.5	88.323	24.5	74.1697
	25.5	92.2621	25.5	90.5396	25.5	93.0688	25.5	88.5819	25.5	92.4337	25.5	87.1991	25.5	85.7207	25.5	86.9745	25.5	74.9986
	26.5	93.4086	26.5	90.9962	26.5	93.0906	26.5	87.5686	26.5	92.0753	26.5	87.5432	26.5	85.4806	26.5	88.1777	26.5	74.3522
	27.5	92.9133	27.5	91.5726	27.5	92.8616	27.5	87.8158	27.5	92.1539	27.5	87.0678	27.5	86.7732	27.5	87.4571	27.5	74.3399
	28.5	92.6159	28.5	91.3901	28.5	92.2736	28.5	88.368	28.5	92.3859	28.5	87.2227	28.5	85.8359	28.5	87.6299	28.5	73.8976
	29.5	92.7092	29.5	92.2122	29.5	93.0817	29.5	87.3825	29.5	93.9815	29.5	87.9568	29.5	85.9183	29.5	87.4916	29.5	74.6562
	30.5	93.6593	30.5	90.9201	30.5	93.6352	30.5	87.8691	30.5	92.8479	30.5	87.6657	30.5	86.1289	30.5	87.7856	30.5	74.8505
	31.5	92.9783	31.5	91.7165	31.5	91.8342	31.5	88.4611	31.5	93.3214	31.5	88.4804	31.5	86.2422	31.5	88.1945	31.5	74.5948
	32.5	93.0973	32.5	90.918	32.5	92.593	32.5	87.934	32.5	93.3326	32.5	88.0516	32.5	86.0035	32.5	88.7969	32.5	75.1962
	33.5	92.8853	33.5	91.672	33.5	92.7343	33.5	88.1229	33.5	92.157	33.5	86.7698	33.5	85.4135	33.5	88.1676	33.5	75.5298
	34.5	93.0464	34.5	91.4751	34.5	92.5773	34.5	87.6397	34.5	93.0941	34.5	86.925	34.5	86.0597	34.5	88.8789	34.5	73.2267
	35.5	93.1166	35.5	92.1282	35.5	92.3041	35.5	88.2344	35.5	93.775	35.5	87.1344	35.5	86.0228	35.5	87.8164	35.5	74.1878
	36.5	93.5368	36.5	90.4216	36.5	92.7939	36.5	88.3834	36.5	91.6323	36.5	87.6207	36.5	86.3145	36.5	88.795	36.5	75.2628
	37.5	93.0963	37.5	90.4915	37.5	93.3821	37.5	88.0895	37.5	92.3726	37.5	87.9788	37.5	86.5789	37.5	88.1326	37.5	74.43
	38.5	93.4361	38.5	91.5316	38.5	92.1379	38.5	88.1877	38.5	93.2603	38.5	87.5325	38.5	85.6135	38.5	88.0896	38.5	74.6627
	39.5	92.8446	39.5	90.2969	39.5	93.1576	39.5	88.1106	39.5	92.9155	39.5	87.5551	39.5	86.4824	39.5	87.7058	39.5	74.8266
	40.5	92.7695	40.5	91.3144	40.5	92.3243	40.5	87.9569	40.5	92.9747	40.5	87.2646	40.5	86.4069	40.5	88.055	40.5	75.2197
	41.5	92.6605	41.5	92.1738	41.5	91.6139	41.5	87.0439	41.5	93.4032	41.5	86.6195	41.5	86.1987	41.5	87.1388	41.5	74.5938
	42.5	92.9422	42.5	91.0772	42.5	91.2859	42.5	87.6339	42.5	93.8744	42.5	86.7227	42.5	86.5892	42.5	89.0127	42.5	74.677
	43.5	93.6182	43.5	91.9555	43.5	91.8082	43.5	88.7276	43.5	93.236	43.5	87.6321	43.5	86.4078	43.5	87.6256	43.5	73.9623
	44.5	93.6474	44.5	91.6281	44.5	92.097	44.5	87.2575	44.5	91.4971	44.5	86.3125	44.5	85.6806	44.5	87.2907	44.5	75.5191
	45.5	93.0985	45.5	91.5736	45.5	92.1589	45.5	88.0987	45.5	92.8694	45.5	86.725	45.5	85.6176	45.5	87.3642	45.5	75.215
	46.5	93.0148	46.5	90.6381	46.5	92.6688	46.5	89.2081	46.5	93.7006	46.5	88.0524	46.5	87.027	46.5	88.4596	46.5	75.477
	47.5	93.8842	47.5	91.5338	47.5	92.022	47.5	88.112	47.5	92.0521	47.5	87.247	47.5	86.4663	47.5	87.8818	47.5	74.8916
	48.5	93.9696	48.5	91.8607	48.5	92.3183	48.5	87.4659	48.5	92.6792	48.5	87.9905	48.5	86.8192	48.5	88.6546	48.5	73.9963
	49.5	93.7751	49.5	90.4266	49.5	91.9223	49.5	87.6385	49.5	92.3128	49.5	87.3856	49.5	86.0638	49.5	87.4448	49.5	75.1682
	50.5	93.3041	50.5	90.7887	50.5	92.6099	50.5	88.2047	50.5	93.2237	50.5	88.5339	50.5	86.4032	50.5	88.52	50.5	75.2221
	51.5	93.3051	51.5	91.658	51.5	92.0673	51.5	88.3009	51.5	93.223	51.5	86.7639	51.5	85.9383	51.5	86.7815	51.5	75.6073
	52.5	93.5137	52.5	91.5118	52.5	92.9329	52.5	87.3547	52.5	93.4965	52.5	87.0547	52.5	86.3859	52.5	87.8951	52.5	74.9548
	53.5	92.9405	53.5	91.1874	53.5	90.8507	53.5	87.3716	53.5	92.7409	53.5	86.7861	53.5	84.9855	53.5	87.4266	53.5	73.9284
	54.5	92.8776	54.5	91.6046	54.5	92.3685	54.5	87.652	54.5	92.4401	54.5	87.7294	54.5	86.7941	54.5	88.5005	54.5	74.4372
	55.5	94.0859	55.5	91.3493	55.5	91.9715	55.5	86.7659	55.5	92.4591	55.5	87.7244	55.5	86.3069	55.5	88.4064	55.5	75.3922
	56.5	93.4555	56.5	90.9298	56.5	92.427	56.5	88.2212	56.5	92.5006	56.5	87.4002	56.5	86.3616	56.5	88.8123	56.5	74.927
	57.5	93.0938	57.5	91.7565	57.5	92.298	57.5	88.4641	57.5	91.963	57.5	87.959	57.5	87.0527	57.5	87.8656	57.5	75.1477
	58.5	93.5213	58.5	91.4086	58.5	92.2357	58.5	88.5075	58.5	92.7504	58.5	86.4585	58.5	86.5146	58.5	87.8346	58.5	75.1137
	59.5	93.4971	59.5	91.6139	59.5	92.0491	59.5	88.4882	59.5	91.7621	59.5	87.2109	59.5	85.5028	59.5	88.665	59.5	74.0685
	60.5	92.347	60.5	91.344	60.5	91.548	60.5	87.9487	60.5	93.6423	60.5	87.7649	60.5	86.091	60.5	88.3709	60.5	74.3426
	61.5	92.6484	61.5	91.3063	61.5	92.0516	61.5	88.6268	61.5	92.8526	61.5	87.5949	61.5	85.7824	61.5	88.5975	61.5	75.0739
	62.5	93.6056	62.5	92.6646	62.5	92.1486	62.5	87.2607	62.5	93.1895	62.5	87.8266	62.5	86.593	62.5	87.5333	62.5	75.6858
	63.5	92.7347	63.5	90.8646	63.5	91.4831	63.5	87.6499	63.5	92.1439	63.5	87.6883	63.5	86.3453	63.5	88.2491	63.5	75.0591
	64.5	93.486	64.5	91.6978	64.5	91.6966	64.5	87.5915	64.5	92.1731	64.5	87.0442	64.5	86.628	64.5	88.1768	64.5	75.0231
	65.5	91.9592	65.5	90.7545	65.5	91.7358	65.5	88.4597	65.5	91.7563	65.5	88.0278	65.5	85.4942	65.5	88.5527	65.5	74.2429
	66.5	92.7663	66.5	91.0582	66.5	92.0534	66.5	88.0636	66.5	93.373	66.5	88.2714	66.5	85.6102	66.5	88.5306	66.5	74.0063
	67.5	93.1593	67.5	90.7921	67.5	92.3794	67.5	87.2099	67.5	92.9619	67.5	86.7896	67.5	86.125	67.5	88.2613	67.5	74.1669
	68.5	93.2866	68.5	91.1829	68.5	92.3915	68.5	87.1259	68.5	92.0424	68.5	87.2733	68.5	85.4477	68.5	88.5234	68.5	75.5126
	69.5	92.8108	69.5	91.3458	69.5	92.9287	69.5	89.1364	69.5	92.3142	69.5	87.76	69.5	85.2132	69.5	88.3538	69.5	74.0078
	70.5	94.6418	70.5	91.7192	70.5	92.2769	70.5	88.9296	70.5	93.117	70.5	87.3882	70.5	86.4625	70.5	88.4951	70.5	74.6002
	71.5	93.1117	71.5	92.0922	71.5	91.3037	71.5	87.7533	71.5	93.5214	71.5	87.0392	71.5	85.3923	71.5	88.6597	71.5	74.2118
	72.5	92.8401	72.5	90.8337	72.5	92.686	72.5	88.1723	72.5	92.115	72.5	87.9164	72.5	85.7235	72.5	88.0022	72.5	74.8147
	73.5	92.8683	73.5	90.5475	73.5	91.7697	73.5	88.1005	73.5	92.5312	73.5	88.1819	73.5	85.4394	73.5	87.8999	73.5	74.8562
	74.5	93.1999	74.5	91.9182	74.5	92.4156	74.5	89.1335	74.5	92.7159	74.5	86.2411	74.5	86.4854	74.5	87.6922	74.5	74.7171
	75.5	93.2062	75.5	91.8047	75.5	92.7025	75.5	88.6043	75.5	92.6193	75.5	88.0847	75.5	85.6224	75.5	88.1997	75.5	75.6788
	76.5	92.4298	76.5	91.6583	76.5	92.8815	76.5	88.1873	76.5	92.7014	76.5	87.4109	76.5	86.4589	76.5	88.3301	76.5	74.7133
	77.5	92.568	77.5	91.0789	77.5	93.3106	77.5	88.0644	77.5	93.2	77.5	87.4874	77.5	86.9201	77.5	88.573	77.5	75.8187
	78.5	92.1213	78.5	91.3524	78.5	91.7049	78.5	87.8573	78.5	92.7426	78.5	87.3102	78.5	86.7525	78.5	88.8339	78.5	74.4384
	79.5	93.5803	79.5	91.2025	79.5	91.5109	79.5	88.185	79.5	92.2505	79.5	88.105	79.5	86.3002	79.5	89.2861	79.5	75.2226
	80.5	92.7537	80.5	91.3983	80.5	92.074	80.5	88.0003	80.5	92.6003	80.5	86.8704	80.5	85.7208	80.5	87.5453	80.5	74.5001
	81.5	92.6539	81.5	90.9845	81.5	92.5295	81.5	87.5156	81.5	92.7918	81.5	88.3963	81.5	86.3719	81.5	87.2583	81.5	74.901
	82.5	93.1358	82.5	90.836	82.5	92.1456	82.5	88.4421	82.5	91.9081	82.5	86.7125	82.5	86.2105	82.5	87.5505	82.5	74.1498
	83.5	93.2337	83.5	90.9227	83.5	92.3519	83.5	88.0714	83.5	92.7572	83.5	87.2428	83.5	85.5213	83.5	87.9734	83.5	74.4002
	84.5	92.3793	84.5	90.613	84.5	91.7429	84.5	88.0854	84.5	92.7144	84.5	87.2768	84.5	86.623	84.5	88.3363	84.5	74.9542
	85.5	93.4444	85.5	91.206	85.5	91.8578	85.5	87.8019	85.5	92.5817	85.5	86.4119	85.5	86.418	85.5	88.2326	85.5	74.4068
	86.5	92.4258	86.5	91.4986	86.5	91.9367	86.5	87.9018	86.5	93.2209	86.5	87.0774	86.5	86.3982	86.5	87.2561	86.5	74.4256
	87.5	93.4843	87.5	90.9151	87.5	91.0542	87.5	88.6187	87.5	91.9311	87.5	87.1407	87.5	86.2747	87.5	88.454	87.5	75.0293
	88.5	93.0689	88.5	90.9103	88.5	91.3108	88.5	87.4816	88.5	91.7514	88.5	86.8519	88.5	85.8505	88.5	88.3993	88.5	75.4227
	89.5	92.6585	89.5	92.1265	89.5	92.7634	89.5	87.9873	89.5	92.727	89.5	86.9718	89.5	86.2154	89.5	88.1978	89.5	74.8365
	90.5	92.7857	90.5	90.9428	90.5	92.0774	90.5	88.9184	90.5	92.0656	90.5	88.2967	90.5	85.7266	90.5	88.8053	90.5	74.1383
	91.5	92.6144	91.5	91.485	91.5	91.7736	91.5	87.7386	91.5	92.9658	91.5	87.663	91.5	85.9942	91.5	88.5051	91.5	74.8254
	92.5	93.5367	92.5	91.2975	92.5	92.4944	92.5	87.5609	92.5	92.3413	92.5	88.4005	92.5	84.9963	92.5	88.7535	92.5	74.465
	93.5	93.3607	93.5	91.287	93.5	91.8192	93.5	88.5456	93.5	92.5984	93.5	87.7096	93.5	86.5323	93.5	88.418	93.5	74.6141
	94.5	93.0354	94.5	92.0924	94.5	92.4431	94.5	88.1333	94.5	92.5844	94.5	88.3943	94.5	85.7919	94.5	88.4677	94.5	74.3813
	95.5	93.6923	95.5	90.889	95.5	91.9053	95.5	89.3455	114.155	93.812	95.5	87.1092	95.5	84.9738	95.5	87.7469	95.5	73.303
	96.5	93.0989	96.5	91.5302	96.5	91.878	96.5	88.2526	115.155	92.8577	96.5	88.086	96.5	85.1452	96.5	88.3231	96.5	74.5257
	97.5	92.758	97.5	91.6037	97.5	92.3127	97.5	87.3758	116.155	94.3801	97.5	87.4975	97.5	85.5681	97.5	87.8586	97.5	74.9938
	98.5	93.3875	98.5	90.94	98.5	92.1721	98.5	88.1516	117.155	93.7726	98.5	86.9921	98.5	85.9977	98.5	87.6828	98.5	75.0628
	99.5	94.3942	99.5	91.5917	99.5	91.7072	99.5	89.0717	118.155	93.813	99.5	87.9392	99.5	85.7354	99.5	87.9328	99.5	74.6478
	100.5	93.6067	100.5	91.1161	100.5	91.7612	100.5	88.3461	119.155	93.9503	100.5	86.8327	100.5	85.2631	100.5	87.9229	100.5	74.2562
	101.5	93.0047	101.5	91.5381	101.5	91.1398	101.5	87.975	120.155	93.785	101.5	86.4927	101.5	86.1947	101.5	87.6278	101.5	74.272
	102.5	93.0373	121.275	90.2788	102.5	92.3343	102.5	87.9424	121.155	94.1269	102.5	87.5683	102.5	86.6652	102.5	88.3138	102.5	73.6933
	103.5	94.0039	122.275	89.8892	103.5	92.6265	103.5	87.4619	122.155	93.2537	103.5	87.5758	103.5	85.3953	103.5	88.1888	103.5	74.4675
	104.5	93.0273	123.275	90.0629	104.5	92.79	104.5	88.0799	123.155	93.7461	104.5	86.8158	104.5	86.052	104.5	88.6292	104.5	74.3203
	105.5	92.991	124.275	90.6363	105.5	92.4942	105.5	87.3082	124.155	94.2147	105.5	87.0533	105.5	85.1572	105.5	88.0121	105.5	74.8321
	106.5	92.3872	125.275	90.3628	106.5	91.5186	106.5	87.1787	125.155	93.9624	106.5	88.0012	106.5	85.6455	106.5	87.6164	106.5	75.583
	107.5	92.7928	126.275	89.7705	107.5	92.2393	107.5	88.3516	126.155	93.3025	107.5	86.3826	107.5	86.4187	107.5	88.3826	107.5	75.0575
	108.5	92.2885	127.275	91.0522	108.5	91.9388	108.5	87.5288	127.155	94.2611	108.5	88.2687	108.5	86.2598	108.5	88.1114	108.5	74.5702
	109.5	92.0584	128.275	90.5128	109.5	92.249	109.5	87.6984	128.155	93.7818	109.5	87.8032	109.5	86.9671	109.5	87.709	109.5	74.5849
	110.5	92.7955	129.275	90.7697	110.5	92.1879	110.5	88.4244	129.155	94.2541	110.5	87.568	110.5	85.8703	110.5	87.0425	110.5	74.113
	111.5	92.7181	130.275	90.139	111.5	91.7785	111.5	88.3547	130.155	94.7879	111.5	87.3284	111.5	85.2589	111.5	88.1051	111.5	74.6891
	112.5	93.1632	131.275	89.9637	112.5	91.6047	112.5	88.1853	131.155	94.6789	112.5	88.383	132.841	88.4057	112.5	87.9741	112.5	74.9735
	113.5	92.343	132.275	90.6399	113.5	92.0651	113.5	88.0776	132.155	93.3804	113.5	87.6852	133.841	89.4281	113.5	88.4218	113.5	73.8426
	134.38	95.1082	133.275	90.4715	114.5	91.6948	114.5	88.5056	133.155	94.2156	114.5	86.8424	134.841	89.7108	114.5	87.7417	114.5	73.9787
	135.38	95.6597	134.275	91.0884	115.5	91.6884	115.5	87.5149	134.155	94.1636	115.5	87.4802	135.841	92.9134	115.5	87.045	115.5	74.3699
	136.38	95.9249	135.275	91.0448	116.5	91.8346	116.5	87.437	135.155	93.9015	116.5	86.9196	136.841	93.8665	116.5	88.9233	116.5	73.7865
	137.38	95.7561	136.275	90.4896	117.5	92.0591	117.5	88.2066	136.155	93.8475	117.5	87.6066	137.841	91.1571	117.5	87.3847	117.5	74.3564
	138.38	94.9875	137.275	90.5235	118.5	91.9703	118.5	87.8851	137.155	94.4678	118.5	87.2522	138.841	91.0475	118.5	87.4956	118.5	74.364
	139.38	94.7836	138.275	91.1081	119.5	91.8423	119.5	87.6308	138.155	93.9204	119.5	87.942	139.841	90.1065	119.5	88.1678	119.5	74.3912
	140.38	96.0244	139.275	92.0637	120.5	92.2913	120.5	88.0999	139.155	94.0452	120.5	87.2185	140.841	89.9778	120.5	87.3135	120.5	74.4059
	141.38	95.5966	140.275	91.2485	121.5	91.6807	121.5	87.5954	140.155	94.2496	121.5	87.6848	141.841	90.1934	121.5	88.3158	121.5	74.6477
	142.38	95.9587	141.275	90.641	122.5	92.4339	122.5	87.467	141.155	94.0141	141.12	91.4433	142.841	91.9314	122.5	87.1956	122.5	74.7984
	143.38	95.4523	142.275	91.2862	123.5	91.6994	123.5	88.2776	142.155	93.5484	142.12	92.1697	143.841	90.5043	123.5	86.5737	123.5	74.6696
	144.38	96.2272	143.275	91.2592	124.5	91.8791	124.5	87.9744	143.155	94.6138	143.12	91.3293	144.841	91.1197	124.5	88.2256	124.5	74.6534
	145.38	96.659	144.275	90.8158	125.5	92.9126	125.5	87.3622	144.155	94.3524	144.12	92.3693	145.841	91.1531	125.5	87.1103	125.5	73.6711
	146.38	96.4016	145.275	91.4667	126.5	92.1811	145.421	88.4961	145.155	94.2128	145.12	91.0519	146.841	91.3807	126.5	88.2075	126.5	75.0074
	147.38	95.9652	146.275	90.5786	127.5	91.2685	146.421	89.4873	146.155	93.7016	146.12	90.9652	147.841	91.999	127.5	86.8127	127.5	74.8558
	148.38	96.5529	147.275	91.6729	128.5	91.3091	147.421	89.1859	147.155	93.906	147.12	90.9851	148.841	91.5337	128.5	88.083	128.5	74.2998
	149.38	96.4108	148.275	90.6377	147.766	91.6204	148.421	89.38	148.155	94.9859	148.12	91.0972	149.841	92.0489	129.5	87.8945	129.5	74.031
	150.38	96.2336	149.275	91.715	148.766	93.2803	149.421	89.8942	149.155	95.0596	149.12	91.3968	150.841	92.0832	130.5	86.2811	130.5	74.3935
	151.38	96.4559	150.275	91.0996	149.766	92.8994	150.421	89.8412	150.155	94.742	150.12	91.8992	151.841	91.6978	131.5	87.6595	131.5	74.8296
	152.38	95.0085	151.275	91.5763	150.766	92.4072	151.421	89.3434	151.155	93.8487	151.12	91.4218	152.841	92.0976	132.5	87.387	132.5	74.2836
	153.38	96.2568	152.275	92.353	151.766	92.2028	152.421	89.7792	152.155	94.6105	152.12	91.5228	153.841	91.0263	133.5	87.4915	133.5	74.2335
	154.38	95.3056	153.275	91.3027	152.766	92.6663	153.421	90.4138	153.155	94.5001	153.12	90.8188	154.841	90.9024	134.5	88.0106	134.5	74.5119
	155.38	96.801	154.275	91.7422	153.766	92.2881	154.421	90.5877	154.155	94.7366	154.12	90.2323	155.841	90.4881	135.5	88.3466	135.5	73.9919
	156.38	95.9266	155.275	90.9184	154.766	92.3474	155.421	89.2358	155.155	93.6943	155.12	90.83	156.841	91.31	136.5	87.4705	136.5	75.0634
	157.38	95.6912	156.275	92.6119	155.766	93.1383	156.421	89.6882	156.155	94.272	156.12	92.1214	157.841	90.1281	137.5	87.7657	137.5	74.5413
	158.38	95.9252	157.275	92.2434	156.766	92.402	157.421	89.5768	157.155	94.777	157.12	91.6437	158.841	90.9308	138.5	88.2311	138.5	74.2061
	159.38	96.8399	158.275	91.8372	157.766	92.3157	158.421	90.791	158.155	93.9572	158.12	91.1106	159.841	90.3534	139.5	88.2023	139.5	73.7414
	160.38	96.7934	159.275	91.5593	158.766	92.8009	159.421	89.9928	159.155	95.0449	159.12	91.3785	160.841	89.9841	140.5	88.504	140.5	74.5113
	161.38	96.427	160.275	92.1846	159.766	93.5668	160.421	89.557	160.155	94.5863	160.12	90.6792	161.841	89.4938	141.5	87.149	141.5	74.169
	162.38	97.2153	161.275	93.0056	160.766	93.364	161.421	91.3564	161.155	94.6206	161.12	90.6068	162.841	90.9891	142.5	88.1988	142.5	74.4807
	163.38	96.8661	162.275	92.9041	161.766	91.7705	162.421	89.9788	162.155	93.5842	162.12	90.5754	163.841	89.6171	143.5	87.9928	143.5	74.0001
	164.38	96.7004	163.275	93.0352	162.766	92.6484	163.421	90.038	163.155	94.1405	163.12	90.5027	164.841	89.8583	144.5	86.926	144.5	74.0312
	165.38	96.8947	164.275	92.4123	163.766	92.9843	164.421	90.5138	164.155	95.1114	164.12	90.5525	165.841	90.0632	145.5	86.8605	145.5	73.6608
	166.38	96.5135	165.275	92.3475	164.766	92.5212	165.421	90.3606	165.155	94.7562	165.12	90.0371	166.841	90.5203	146.5	87.4302	146.5	73.9035
	167.38	96.5839	166.275	92.5934	165.766	93.2119	166.421	89.8696	166.155	95.6802	166.12	90.5787	167.841	90.495	147.5	86.6472	147.5	74.2007
	168.38	96.1392	167.275	92.4916	166.766	92.731	167.421	90.4454	167.155	95.013	167.12	91.2133	168.841	90.0046	148.5	88.3278	148.5	74.8213
	169.38	97.4283	168.275	92.4984	167.766	94.258	168.421	90.0493	168.155	96.6781	168.12	91.0119	169.841	89.3455	149.5	87.1567	149.5	74.8598
	170.38	97.2832	169.275	92.8588	168.766	94.5348	169.421	90.9177	169.155	94.8568	169.12	91.2058	170.841	89.5031	150.5	87.0868	150.5	75.0988
	171.38	97.1763	170.275	92.4774	169.766	93.184	170.421	90.1735	170.155	95.3927	170.12	91.2367	171.841	90.1887	151.5	87.3737	151.5	74.1135
	172.38	96.792	171.275	91.9406	170.766	92.7282	171.421	90.5996	171.155	95.3146	171.12	91.0525	172.841	89.5075	152.5	87.653	152.5	74.6055
	173.38	96.7244	172.275	92.4891	171.766	93.2408	172.421	90.4667	172.155	94.3166	172.12	90.8043	173.841	89.3231	153.5	87.2078	153.5	74.0245
	174.38	96.9515	173.275	92.6565	172.766	93.9569	173.421	91.0677	173.155	95.6507	173.12	91.1273	174.841	90.1326	154.5	87.9388	154.5	73.7439
	175.38	97.2706	174.275	92.8626	173.766	94.0256	174.421	91.4628	174.155	95.2734	174.12	91.3389	175.841	90.2888	155.5	87.6494	155.5	74.6067
	176.38	97.7166	175.275	93.272	174.766	93.014	175.421	89.6256	175.155	95.4591	175.12	91.7679	176.841	89.671	156.5	87.21	156.5	74.7664
	177.38	96.8196	176.275	93.1881	175.766	92.2042	176.421	90.9287	176.155	95.5573	176.12	91.1067	177.841	89.6066	157.5	87.4502	157.5	74.7038
	178.38	97.412	177.275	93.7756	176.766	92.4983	177.421	89.8558	177.155	96.1297	177.12	89.7625	178.841	89.2648	158.5	89.1	158.5	74.8684
	179.38	97.0411	178.275	94.0377	177.766	93.4835	178.421	90.5974	178.155	94.8081	178.12	91.7504	179.841	89.9486	159.5	87.9654	159.5	72.8784
	180.38	97.4814	179.275	93.6394	178.766	93.1577	179.421	91.7244	179.155	95.4748	179.12	90.6573	180.841	89.6755	160.5	87.4111	160.5	74.4242
	181.38	97.2488	180.275	92.5967	179.766	93.6013	180.421	90.3503	180.155	95.4847	180.12	91.3386	181.841	90.8069	161.5	87.2032	161.5	73.7838
	182.38	97.8979	181.275	93.757	180.766	94.7478	181.421	91.6434	181.155	95.3437	181.12	90.6878	182.841	89.6921	162.5	87.1854	162.5	74.8475
	183.38	97.2383	182.275	94.0229	181.766	93.0413	182.421	91.4031	182.155	95.437	182.12	91.3851	183.841	90.4266	163.5	87.5693	163.5	74.9536
	184.38	97.883	183.275	93.4442	182.766	93.1827	183.421	90.8605	183.155	95.1485	183.12	90.8889	184.841	89.359	164.5	87.9114	164.5	73.6271
	185.38	98.025	184.275	94.6599	183.766	93.5247	184.421	89.9974	184.155	95.8726	184.12	90.9786	185.841	90.1609	165.5	86.7895	165.5	73.6553
	186.38	97.8523	185.275	92.8445	184.766	93.7435	185.421	91.8734	185.155	96.1479	185.12	91.9111	186.841	91.2005	166.5	87.8344	166.5	74.0031
	187.38	97.7583	186.275	94.1061	185.766	94.5219	186.421	91.0962	186.155	96.186	186.12	90.9296	187.841	89.8212	167.5	88.7599	167.5	74.4558
	188.38	97.3339	187.275	94.1548	186.766	94.0132	187.421	90.9613	187.155	95.8598	187.12	90.9167	188.841	90.8527	168.5	88.4609	168.5	75.0538
	189.38	98.4067	188.275	94.328	187.766	93.2709	188.421	91.4583	188.155	95.6631	188.12	92.4206	189.841	90.2751	169.5	88.1854	169.5	74.2941
	190.38	97.72	189.275	93.6947	188.766	93.1254	189.421	91.1341	189.155	96.1505	189.12	91.2467	190.841	90.017	170.5	88.0874	170.5	74.2243
	191.38	98.8749	190.275	93.5925	189.766	94.5138	190.421	90.7871	190.155	95.6959	190.12	92.6468	191.841	89.106	171.5	88.1942	171.5	74.875
	192.38	98.5768	191.275	93.944	190.766	93.5657	191.421	91.2408	191.155	96.0208	191.12	91.4186	192.841	90.6213	172.5	88.5292	172.5	75.31
	193.38	97.6756	192.275	93.9253	191.766	94.7295	192.421	90.7727	192.155	96.2421	192.12	90.7635	193.841	90.3319	173.5	88.3884	173.5	75.6396
	194.38	98.7322	193.275	95.1738	192.766	94.8686	193.421	91.4981	193.155	96.9841	193.12	91.326	194.841	89.262	174.5	88.0466	174.5	74.1557
	195.38	99.0787	194.275	94.3884	193.766	94.2366	194.421	91.4494	194.155	96.0693	194.12	90.8207	195.841	89.9357	175.5	87.914	175.5	74.5546
	196.38	99.3483	195.275	94.4365	194.766	94.2084	195.421	91.1343	195.155	96.5163	195.12	90.3179	196.841	89.4239	176.5	88.7498	176.5	74.4736
	197.38	98.0252	196.275	94.1193	195.766	95.2778	196.421	91.5442	196.155	96.4583	196.12	91.1015	197.841	89.7548	177.5	87.0065	177.5	74.3423
	198.38	97.6469	197.275	95.2444	196.766	93.6896	197.421	91.8169	197.155	96.4216	197.12	90.8893	198.841	90.4908	178.5	87.7175	178.5	75.1141
	199.38	98.9593	198.275	94.7921	197.766	93.644	198.421	92.2863	198.155	96.3604	198.12	91.446	199.841	90.5156	198.274	87.4971	179.5	74.7091
	200.38	99.4389	199.275	94.63	198.766	94.7522	199.421	91.7334	199.155	96.1316	199.12	90.3786	200.841	89.0463	199.274	88.701	180.5	74.5696
	201.38	97.9727	200.275	94.9451	199.766	93.9293	200.421	91.4775	200.155	96.4668	200.12	91.0756	201.841	89.37	200.274	88.8806	181.5	73.9411
	202.38	98.6967	201.275	94.3571	200.766	94.8824	201.421	91.376	201.155	96.3845	201.12	90.9475	202.841	91.5714	201.274	88.5127	182.5	73.5063
	203.38	98.8908	202.275	94.8186	201.766	94.7905	202.421	91.0914	202.155	95.8758	202.12	92.3501	203.841	90.01	202.274	88.3831	183.5	74.4806
	204.38	99.3735	203.275	95.0026	202.766	94.3224	203.421	91.8796	203.155	95.8837	203.12	92.1129	204.841	89.9757	203.274	87.7614	184.5	74.2471
	205.38	99.0209	204.275	95.5712	203.766	94.4729	204.421	91.5533	204.155	97.4522	204.12	91.7348	205.841	90.7453	204.274	88.3103	185.5	74.9888
	206.38	99.1894	205.275	95.5298	204.766	95.0294	205.421	91.5079	205.155	97.4069	205.12	90.6411	206.841	89.8371	205.274	87.7591	186.5	74.0185
	207.38	98.3912	206.275	95.2561	205.766	94.4967	206.421	92.769	206.155	97.4361	206.12	91.5075	207.841	89.8974	206.274	88.7241	187.5	75.0231
	208.38	99.1877	207.275	95.8366	206.766	95.1907	207.421	92.1829	207.155	96.9224	207.12	90.8019	208.841	90.5668	207.274	88.4391	188.5	74.5749
	209.38	99.3706	208.275	94.8406	207.766	95.2413	208.421	91.9017	208.155	96.938	208.12	90.6679	209.841	90.2556	208.274	87.9992	189.5	74.9193
	210.38	98.1264	209.275	95.1513	208.766	95.5868	209.421	91.9652	209.155	97.562	209.12	90.8221	210.841	90.6669	209.274	88.9069	190.5	74.8005
	211.38	99.7872	210.275	95.3009	209.766	95.6132	210.421	92.1045	210.155	96.5133	210.12	91.747	211.841	89.9478	210.274	88.5151	191.5	74.9339
	212.38	99.825	211.275	96.7894	210.766	95.4184	211.421	92.5288	211.155	97.5004	211.12	91.5522	212.841	90.5678	211.274	89.0624	192.5	74.3132
	213.38	100.16	212.275	94.5092	211.766	95.2484	212.421	92.7304	212.155	96.1136	212.12	91.0251	213.841	89.8044	212.274	89.1663	193.5	74.4957
	214.38	100.34	213.275	95.2413	212.766	94.6736	213.421	92.4765	213.155	96.7732	213.12	91.9204	214.841	90.1636	213.274	88.6017	194.5	74.8953
	215.38	100.034	214.275	96.7915	213.766	95.3498	214.421	92.6271	214.155	97.5479	214.12	91.2304	215.841	89.6425	214.274	88.3478	195.5	74.882
	216.38	99.5493	215.275	95.8279	214.766	95.6879	215.421	92.6292	215.155	96.476	215.12	91.5383	216.841	90.3129	215.274	88.5794	196.5	74.8851
	217.38	99.3541	216.275	96.5127	215.766	95.2061	216.421	91.8739	216.155	96.2483	216.12	91.5012	217.841	90.2431	216.274	88.942	197.5	74.2459
	218.38	100.745	217.275	96.4873	216.766	95.6303	217.421	93.0907	217.155	96.576	217.12	91.4421	218.841	89.9483	217.274	88.5134	198.5	73.8947
	219.38	99.4706	218.275	96.4397	217.766	96.239	218.421	91.9195	218.155	95.9588	218.12	91.9618	219.841	90.0239	218.274	88.7338	199.5	74.9046
	220.38	99.8704	219.275	94.9941	218.766	95.7051	219.421	93.3032	219.155	95.8476	219.12	90.1858	220.841	90.2424	219.274	88.1594	200.5	74.9889
	221.38	100.806	220.275	96.2646	219.766	96.4953	220.421	92.1531	220.155	97.704	220.12	91.3651	221.841	90.506	220.274	89.006	201.5	74.6202
	222.38	99.7231	221.275	97.4783	220.766	95.1969	221.421	92.8522	221.155	96.1687	221.12	91.66	222.841	90.3118	221.274	88.9086	202.5	74.2721
	223.38	100.118	222.275	96.5427	221.766	96.3127	222.421	93.1987	222.155	97.3028	222.12	91.6322	223.841	89.9334	222.274	88.3135	203.5	73.7736
	224.38	100.261	223.275	95.8298	222.766	95.1849	223.421	91.8025	223.155	96.6198	223.12	91.9531	224.841	90.4953	223.274	88.3807	204.5	74.015
	225.38	98.7139	224.275	96.3125	223.766	95.4829	224.421	92.6817	224.155	97.0758	224.12	91.5213	225.841	91.2882	224.274	88.0751	205.5	74.1894
	226.38	100.274	225.275	96.1696	224.766	95.5972	225.421	93.5823	225.155	95.9949	225.12	90.8487	226.841	90.1205	225.274	87.3542	206.5	74.4372
	227.38	99.6724	226.275	95.4365	225.766	96.5036	226.421	93.1158	226.155	96.6958	226.12	91.5548	227.841	91.0716	226.274	88.8556	207.5	74.2311
	228.38	99.9669	227.275	96.0747	226.766	97.3935	227.421	93.028	227.155	96.8991	227.12	91.5716	228.841	91.2495	227.274	88.5956	208.5	74.6072
	229.38	101.63	228.275	96.7296	227.766	95.7826	228.421	92.2337	228.155	96.8262	228.12	91.789	229.841	90.5449	228.274	88.7757	209.5	74.7016
	230.38	102.134	229.275	97.6809	228.766	96.6248	229.421	92.8014	229.155	97.3141	229.12	92.3893	230.841	90.4794	229.274	89.5048	210.5	74.7976
	231.38	100.8	230.275	96.4997	229.766	96.6719	230.421	92.8505	230.155	98.21	230.12	91.7813	231.841	91.6599	230.274	88.8853	211.5	74.3715
	232.38	99.5396	231.275	96.4867	230.766	95.4344	231.421	93.0554	231.155	97.0824	231.12	91.4726	232.841	90.8632	231.274	88.3782	212.5	74.6451
	233.38	101.415	232.275	96.2822	231.766	96.0861	232.421	92.8121	232.155	96.5284	232.12	92.2375	233.841	90.5107	232.274	88.4337	213.5	74.6298
	234.38	100.401	233.275	96.8472	232.766	96.6943	233.421	93.0346	233.155	98.2132	233.12	91.6404	234.841	90.8541	233.274	89.1578	214.5	74.0282
	235.38	101.375	234.275	97.3642	233.766	96.5762	234.421	93.5084	234.155	97.571	234.12	91.4062	235.841	90.7609	234.274	89.3501	215.5	74.4792
	236.38	100.581	235.275	96.2274	234.766	95.493	235.421	94.226	235.155	98.4189	235.12	90.9498	236.841	90.4996	235.274	88.6599	216.5	74.6234
	237.38	101	236.275	97.5744	235.766	97.8955	236.421	93.0328	236.155	97.5349	236.12	92.6611	237.841	91.006	236.274	88.6182	217.5	74.6672
	238.38	101.775	237.275	96.0141	236.766	96.0685	237.421	91.9461	237.155	97.2718	237.12	90.9161	238.841	91.1016	237.274	88.8603	218.5	74.639
	239.38	101.91	238.275	97.0664	237.766	96.8811	238.421	93.3177	238.155	97.938	238.12	92.2367	239.841	91.2642	238.274	88.3775	219.5	73.9564
	240.38	101.373	239.275	96.3215	238.766	96.5293	239.421	93.1894	239.155	98.2576	239.12	92.3807	240.841	90.5639	239.274	88.9893	220.5	74.1881
	241.38	101.422	240.275	97.5703	239.766	96.981	240.421	93.7486	240.155	97.9599	240.12	92.106	241.841	90.8391	240.274	89.2899	221.5	74.4508
	242.38	102.13	241.275	96.894	240.766	96.5329	241.421	92.8556	241.155	97.269	241.12	92.3062	242.841	89.6671	241.274	88.3073	222.5	74.8631
	243.38	101.772	242.275	96.7954	241.766	97.7754	242.421	93.417	242.155	97.4353	242.12	91.9314	243.841	90.5312	242.274	89.1327	223.5	74.0646
	244.38	101.253	243.275	97.4654	242.766	96.8369	243.421	94.8268	243.155	98.1529	243.12	92.0841	244.841	90.8905	243.274	89.5543	224.5	74.4719
	245.38	101.583	244.275	97.6024	243.766	96.6506	244.421	93.334	244.155	97.2085	244.12	92.2202	245.841	89.5286	244.274	89.3537	225.5	74.4268
	246.38	102.178	245.275	97.2981	244.766	97.2036	245.421	93.4563	245.155	97.9928	245.12	92.0339	246.841	91.638	245.274	90.0032	226.5	73.9271
	247.38	101.773	246.275	97.0763	245.766	96.7777	246.421	93.4259	246.155	98.3033	246.12	92.2552	247.841	91.9341	246.274	89.2185	227.5	74.5912
	248.38	101.379	247.275	98.9594	246.766	97.9761	247.421	94.5345	247.155	98.4336	247.12	92.0691	248.841	90.2364	247.274	89.3579	228.5	74.8475
	249.38	102.29	248.275	98.8471	247.766	97.7365	248.421	94.2188	248.155	96.9473	248.12	91.3088	249.841	91.5324	248.274	88.4822	229.5	73.7045
	250.38	100.55	249.275	97.2116	248.766	97.7441	249.421	93.317	249.155	97.2297	249.12	92.6918	250.841	90.7914	249.274	89.3669	230.5	74.5232
	251.38	102.083	250.275	97.5618	249.766	97.4377	250.421	94.0974	250.155	96.7702	250.12	91.7672	251.841	90.7559	250.274	89.8091	231.5	74.4295
	252.38	102.795	251.275	98.202	250.766	98.7469	251.421	93.7488	251.155	98.1339	251.12	92.4913	252.841	91.2554	251.274	89.5525	232.5	74.6878
	253.38	102.434	252.275	98.2073	251.766	97.1667	252.421	93.5439	252.155	97.6351	252.12	92.1469	253.841	90.3248	252.274	89.0613	233.5	74.2372
	254.38	102.218	253.275	97.5181	252.766	97.3602	253.421	93.3315	253.155	97.75	253.12	92.7009	254.841	90.6773	253.274	88.4495	234.5	74.8111
	255.38	102.968	254.275	98.3272	253.766	97.3456	254.421	94.4691	254.155	97.8206	254.12	92.8144	255.841	90.0415	254.274	89.558	235.5	73.9537
	256.38	102.394	255.275	98.5862	254.766	97.3716	255.421	94.0352	255.155	98.1169	255.12	91.8127	256.841	91.5135	255.274	88.6843	236.5	73.8186
	257.38	101.962	256.275	98.4882	255.766	97.7377	256.421	94.3468	256.155	97.9363	256.12	92.4841	257.841	90.6341	256.274	88.4134	237.5	74.2584
	258.38	103.305	257.275	97.8863	256.766	97.5249	257.421	94.3612	257.155	99.025	257.12	91.2489	258.841	90.7185	257.274	88.0554	238.5	75.4218
	259.38	102.61	258.275	98.3129	257.766	97.7197	258.421	94.1918	258.155	98.1979	258.12	92.0991	259.841	90.9529	258.274	88.9325	239.5	74.2375
	260.38	102.061	259.275	97.6581	258.766	97.8991	259.421	94.8281	259.155	99.176	259.12	92.8551	260.841	91.4327	259.274	89.8414	240.5	74.5485
	261.38	103.345	260.275	98.5568	259.766	97.8649	260.421	94.3106	260.155	98.5703	260.12	92.1968	261.841	91.2822	260.274	90.0213	241.5	74.5032
	262.38	102.314	261.275	98.5717	260.766	98.1036	261.421	95.0131	261.155	98.6175	261.12	91.2909	262.841	90.3751	261.274	88.7871	242.5	74.7471
	263.38	102.577	262.275	98.429	261.766	98.4446	262.421	94.5747	262.155	98.2187	262.12	91.624	263.841	91.0409	262.274	89.616	243.5	74.0359
	264.38	101.985	263.275	99.1779	262.766	97.4399	263.421	93.7261	263.155	99.4873	263.12	92.8641	264.841	91.0781	263.274	89.4917	244.5	74.8199
	265.38	103.826	264.275	98.0712	263.766	98.6676	264.421	93.154	264.155	99.3717	264.12	93.1033	265.841	90.8568	264.274	89.2322	245.5	74.3029
	266.38	102.883	265.275	99.1227	264.766	98.0936	265.421	94.5474	265.155	99.0818	265.12	92.5593	266.841	90.4878	265.274	88.51	246.5	74.3659
	267.38	103.231	266.275	97.9746	265.766	98.5791	266.421	94.7709	266.155	98.3277	266.12	91.1512	267.841	90.1939	266.274	89.5845	247.5	75.1613
	268.38	102.557	267.275	99.2058	266.766	98.5304	267.421	94.3436	267.155	97.581	267.12	92.5018	268.841	90.0109	267.274	88.7144	248.5	74.3
	269.38	103.373	268.275	99.1253	267.766	98.4638	268.421	94.7219	268.155	98.5591	268.12	91.9049	269.841	90.199	268.274	89.3768	249.5	74.7687
	270.38	102.573	269.275	98.4466	268.766	98.5244	269.421	94.5628	269.155	98.319	269.12	91.8805	270.841	90.7387	269.274	89.5389	250.5	74.4006
	271.38	103.585	270.275	98.6954	269.766	98.2315	270.421	94.8426	270.155	98.5898	270.12	92.786	271.841	90.7664	270.274	89.3059	251.5	74.3524
	272.38	102.792	271.275	99.233	270.766	97.7472	271.421	94.6391	271.155	99.0633	271.12	92.6119	272.841	90.8378	271.274	89.1642	252.5	74.6311
	273.38	103.28	272.275	99.2402	271.766	98.1597	272.421	94.6445	272.155	98.5031	272.12	92.2437	273.841	91.1736	272.274	89.7433	253.5	74.1392
	274.38	103.781	273.275	97.9261	272.766	98.3476	273.421	94.7434	273.155	98.1164	273.12	92.6348	274.841	91.3629	273.274	89.0657	254.5	74.1622
	275.38	103.208	274.275	97.9679	273.766	98.5523	274.421	94.8583	274.155	99.0394	274.12	93.0562	275.841	90.1505	274.274	89.2286	255.5	73.9277
	276.38	103.657	275.275	99.8263	274.766	99.09	275.421	94.4732	275.155	98.3305	275.12	92.1042	276.841	90.4034	275.274	88.5693	256.5	74.1968
	277.38	103.993	276.275	99.3496	275.766	97.8319	276.421	93.3798	276.155	97.8263	276.12	91.8692	277.841	91.5898	276.274	88.8726	257.5	74.1297
	278.38	104.021	277.275	98.6487	276.766	99.3002	277.421	94.3109	277.155	98.3731	277.12	93.5003	278.841	90.0891	277.274	90.1407	258.5	75.5735
	279.38	103.332	278.275	97.9605	277.766	99.457	278.421	94.4388	278.155	98.663	278.12	92.5428	279.841	90.2987	278.274	88.8511	259.5	73.4358
	280.38	103.729	279.275	99.3564	278.766	99.0227	279.421	94.3764	279.155	98.3375	279.12	92.6249	280.841	91.4017	279.274	88.3554	260.5	74.4293
	281.38	104.032	280.275	99.4953	279.766	98.4096	280.421	95.1906	280.155	98.6669	280.12	91.6945	281.841	91.0769	280.274	88.5197	261.5	74.4452
	282.38	104.15	281.275	99.3697	280.766	99.0814	281.421	96.1068	281.155	99.4564	281.12	92.6385	282.841	91.4628	281.274	89.4242	262.5	74.074
	283.38	103.06	282.275	99.7487	281.766	98.6492	282.421	95.3547	282.155	98.3894	282.12	91.5433	283.841	90.6257	282.274	89.2832	263.5	74.2476
	284.38	103.877	283.275	99.3464	282.766	99.3425	283.421	95.041	283.155	99.8803	283.12	92.3567	284.841	90.8932	283.274	89.0003	264.5	74.5035
	285.38	104.678	284.275	99.6428	283.766	99.6476	284.421	94.7864	284.155	99.6092	284.12	92.211	285.841	90.7269	284.274	90.0378	265.5	74.6656
	286.38	104.483	285.275	99.2201	284.766	98.3689	285.421	95.1451	285.155	99.8388	285.12	91.6814	286.841	89.8109	285.274	88.6498	266.5	74.1208
	287.38	103.611	286.275	99.9479	285.766	99.3667	286.421	95.4868	286.155	98.9728	286.12	92.1395	287.841	91.214	286.274	89.42	267.5	74.1878
	288.38	104.467	287.275	99.7356	286.766	99.6428	287.421	94.8272	287.155	98.9349	287.12	91.5587	288.841	90.829	287.274	89.2274	268.5	74.8878
	289.38	103.465	288.275	99.5613	287.766	99.7221	288.421	94.7969	288.155	99.594	288.12	93.07	289.841	90.1059	288.274	89.5958	289.339	73.2676
	290.38	104.685	289.275	100.549	288.766	99.5118	289.421	96.1061	289.155	98.4245	289.12	92.5082	290.841	91.0768	289.274	88.3051	290.339	74.2344
	291.38	103.848	290.275	100.828	289.766	99.8767	290.421	95.1487	290.155	98.8686	290.12	92.401	291.841	91.2138	290.274	88.7247	291.339	73.5813
	292.38	104.801	291.275	99.8287	290.766	98.9794	291.421	95.4473	291.155	99.0793	291.12	93.1561	292.841	90.3395	291.274	88.7701	292.339	74.1405
	293.38	104.93	292.275	99.7318	291.766	99.7781	292.421	95.0088	292.155	99.0621	292.12	92.588	293.841	90.7082	292.274	88.2987	293.339	74.1703
	294.38	104.577	293.275	99.7004	292.766	98.3472	293.421	95.3436	293.155	98.2189	293.12	92.7161	294.841	89.8929	293.274	88.3086	294.339	74.8235
	295.38	103.666	294.275	100.393	293.766	99.7391	294.421	95.7244	294.155	99.9874	294.12	92.5982	295.841	91.0525	294.274	89.6798	295.339	74.5453
	296.38	104.92	295.275	100.816	294.766	100.511	295.421	95.8217	295.155	98.37	295.12	91.966	296.841	91.0843	295.274	88.6839	296.339	73.9242
	297.38	104.321	296.275	100.226	295.766	99.4646	296.421	95.2896	296.155	97.5191	296.12	91.3349	297.841	91.6065	296.274	88.585	297.339	74.595
	298.38	104.584	297.275	99.7212	296.766	99.7974	297.421	95.1814	297.155	98.6845	297.12	92.1305	298.841	90.3566	297.274	89.3231	298.339	74.7688
	299.38	104.649	298.275	100.558	297.766	100.652	298.421	95.209	298.155	98.6031	298.12	92.9023	299.841	90.5395	298.274	89.2907	299.339	75.274
	300.38	105.147	299.275	99.553	298.766	100.144	299.421	95.0266	299.155	99.0405	299.12	93.2524	300.841	91.1434	299.274	89.1252	300.339	73.756
	301.38	104.787	300.275	100.588	299.766	99.7756	300.421	96.238	300.155	99.0841	300.12	92.3416	301.841	91.0024	300.274	89.7469	301.339	74.1138
	302.38	104.559	301.275	100.137	300.766	100.099	301.421	95.5959	301.155	98.7557	301.12	92.4376	302.841	91.2791	301.274	89.0581	302.339	75.109
	303.38	105.257	302.275	100.907	301.766	100.719	302.421	96.0359	302.155	98.6829	302.12	92.9085	303.841	90.9327	302.274	89.4603	303.339	74.329
	304.38	104.517	303.275	100.641	302.766	100.035	303.421	96.2343	303.155	99.0731	303.12	92.8454	304.841	91.1959	303.274	89.3892	304.339	74.6121
	305.38	105.193	304.275	100.225	303.766	100.774	304.421	95.4479	304.155	99.4842	304.12	92.7312	305.841	90.9709	304.274	88.9919	305.339	74.3386
	306.38	105.391	305.275	101.498	304.766	99.6542	305.421	95.4549	305.155	100.064	305.12	93.0444	306.841	90.7193	305.274	89.4215	306.339	75.8251
	307.38	105.359	306.275	100.126	305.766	100.075	306.421	95.8783	306.155	99.5175	306.12	92.0855	307.841	91.0501	306.274	89.6797	307.339	74.6528
	308.38	105.066	307.275	101.621	306.766	100.249	307.421	96.194	307.155	100.747	307.12	92.9076	308.841	91.5774	307.274	89.608	308.339	73.7247
	309.38	105.891	308.275	100.55	307.766	100.298	308.421	96.108	308.155	99.9315	308.12	93.2826	309.841	91.3915	308.274	89.9103	309.339	73.9038
	310.38	105.439	309.275	101.171	308.766	99.497	309.421	95.7875	309.155	99.4649	309.12	92.867	310.841	90.2473	309.274	88.9719	310.339	74.6765
	311.38	104.708	310.275	101.2	309.766	99.7411	310.421	96.3686	310.155	100.271	310.12	91.888	311.841	90.6682	310.274	90.048	311.339	75.4163
	312.38	105.385	311.275	100.903	310.766	99.7589	311.421	96.183	311.155	99.6737	311.12	92.4987	312.841	90.6601	311.274	90.5439	312.339	74.9019
	313.38	106.205	312.275	101.259	311.766	100.71	312.421	96.4266	312.155	99.7993	312.12	93.1697	313.841	91.2225	312.274	90.1775	313.339	74.7158
	314.38	105.054	313.275	101.082	312.766	100.071	313.421	96.1402	313.155	99.9305	313.12	93.0072	314.841	90.9196	313.274	89.2244	314.339	74.8684
	315.38	105.382	314.275	100.073	313.766	100.228	314.421	95.7338	314.155	98.882	314.12	93.2242	315.841	91.0745	314.274	90.0247	315.339	73.9982
	316.38	105.87	315.275	102.312	314.766	100.875	315.421	95.6399	315.155	98.9253	315.12	93.243	316.841	92.1942	315.274	89.4918	316.339	73.9964
	317.38	104.837	316.275	101.266	315.766	100.842	316.421	96.546	316.155	99.8471	316.12	92.4802	317.841	91.4244	316.274	88.9984	317.339	74.319
	318.38	105.896	317.275	101.081	316.766	101.297	317.421	97.1445	317.155	99.8135	317.12	92.8074	318.841	91.9805	317.274	89.7165	318.339	73.8955
	319.38	104.4	318.275	101.391	317.766	99.9859	318.421	96.3875	318.155	99.7139	318.12	92.5531	319.841	91.7118	318.274	88.7871	319.339	74.5072
	320.38	106.253	319.275	101.195	318.766	101.272	319.421	97.0513	319.155	98.5896	319.12	92.0242	320.841	91.485	319.274	89.9644	320.339	74.0272
	321.38	105.898	320.275	101.333	319.766	101.51	320.421	96.9286	320.155	99.8831	320.12	93.209	321.841	91.2285	320.274	88.2117	321.339	74.8722
	322.38	105.895	321.275	101.158	320.766	101.937	321.421	96.7136	321.155	99.9324	321.12	92.7905	322.841	90.8783	321.274	89.6792	322.339	74.1209
	323.38	105.637	322.275	100.095	321.766	100.666	322.421	96.7695	322.155	99.7833	322.12	92.7487	323.841	90.8433	322.274	89.2917	323.339	74.8251
	324.38	104.891	323.275	101.053	322.766	100.974	323.421	96.4133	323.155	100.268	323.12	93.0289	324.841	92.4782	323.274	89.8564	324.339	73.7335
	325.38	106.638	324.275	102.348	323.766	101.334	324.421	96.363	324.155	99.5624	324.12	93.0243	325.841	91.9384	324.274	89.3123	325.339	74.3417
	326.38	106.038	325.275	101.729	324.766	100.339	325.421	96.739	325.155	99.4028	325.12	92.5167	326.841	90.4794	325.274	89.0565	326.339	74.5464
	327.38	106.398	326.275	102.521	325.766	101.03	326.421	96.887	326.155	100.74	326.12	92.9559	327.841	89.8036	326.274	89.1688	327.339	74.0677
	328.38	107.246	327.275	101.511	326.766	102.254	327.421	96.8872	327.155	99.7483	327.12	93.6129	328.841	91.4586	327.274	89.3495	328.339	74.5563
	329.38	105.834	328.275	101.288	327.766	101.588	328.421	97.0763	328.155	100.842	328.12	94.0251	329.841	91.1865	328.274	88.5963	329.339	74.3141
	330.38	106.062	329.275	100.82	328.766	100.709	329.421	97.6104	329.155	100.543	329.12	92.8272	330.841	90.8598	329.274	88.9374	330.339	75.0211
	331.38	106.62	330.275	102.267	329.766	100.765	330.421	96.9982	330.155	99.7442	330.12	92.9616	331.841	91.0333	330.274	89.7058	331.339	75.1493
	332.38	106.401	331.275	102.8	330.766	101.117	331.421	96.2899	331.155	100.31	331.12	93.0948	332.841	90.8688	331.274	89.0776	332.339	75.1363
	333.38	106.366	332.275	101.659	331.766	101.237	332.421	97.0892	332.155	100.451	332.12	92.8077	333.841	91.7548	332.274	89.6496	333.339	74.8462
	334.38	106.725	333.275	101.621	332.766	101.609	333.421	97.6553	333.155	100.639	333.12	92.9324	334.841	91.0565	333.274	88.3299	334.339	75.1347
	335.38	107.14	334.275	101.557	333.766	100.331	334.421	97.6582	334.155	101.004	334.12	92.6532	335.841	90.9425	334.274	88.2383	335.339	74.3574
	336.38	106.709	335.275	102.737	334.766	102.043	335.421	97.7104	335.155	99.8092	335.12	92.921	336.841	91.0922	335.274	88.6222	336.339	75.2754
	337.38	107.427	336.275	101.987	335.766	101.118	336.421	97.6836	336.155	101.228	336.12	93.6713	337.841	91.0866	336.274	89.5613	337.339	73.7001
	338.38	105.962	337.275	102.961	336.766	101.373	337.421	97.4031	337.155	100.139	337.12	93.0428	338.841	90.5516	337.274	89.148	338.339	75.2673
	339.38	106.797	338.275	103.382	337.766	102.155	338.421	96.8301	338.155	100.248	338.12	93.9142	339.841	91.1759	338.274	90.2982	339.339	74.9814
	340.38	106.173	339.275	102.864	338.766	101.5	339.421	97.6066	339.155	99.7304	339.12	92.8656	340.841	90.1974	339.274	89.4093	340.339	75.0111
	341.38	107.547	340.275	102.738	339.766	102.163	340.421	97.1855	340.155	100.61	340.12	93.8274	341.841	90.9936	340.274	88.9336	341.339	74.6397
	342.38	106.229	341.275	103.733	340.766	101.236	341.421	98.4295	341.155	100.033	341.12	93.1776	342.841	91.7853	341.274	89.1403	342.339	74.2451
	343.38	106.121	342.275	103.133	341.766	101.572	342.421	97.5451	342.155	100.707	342.12	93.3118	343.841	91.2093	342.274	89.2259	343.339	74.294
	344.38	106.565	343.275	102.555	342.766	101.453	343.421	98.0017	343.155	100.328	343.12	92.8536	344.841	91.0496	343.274	89.0853	344.339	74.0878
	345.38	107.057	344.275	103.046	343.766	101.74	344.421	97.9669	344.155	100.585	344.12	92.9902	345.841	91.7264	344.274	89.1508	345.339	75.0039
	346.38	108.117	345.275	102.265	344.766	102.592	345.421	97.3688	345.155	100.891	345.12	93.7888	346.841	90.2762	345.274	89.9448	346.339	75.4121
	347.38	107.038	346.275	101.782	345.766	103.017	346.421	97.6765	346.155	100.343	346.12	93.1821	347.841	90.8179	346.274	89.5925	347.339	74.4092
	348.38	107.194	347.275	103.046	346.766	101.939	347.421	97.125	347.155	100.769	347.12	93.0776	348.841	90.1871	347.274	89.6897	348.339	74.4744
	349.38	107.065	348.275	102.983	347.766	102.019	348.421	97.2807	348.155	100.478	348.12	92.0719	349.841	90.0595	348.274	89.1566	349.339	74.8607
	350.38	108.055	349.275	103.008	348.766	101.382	349.421	97.6593	349.155	99.5698	349.12	93.5006	350.841	90.9155	349.274	90.1693	350.339	74.1611
	351.38	107.594	350.275	102.721	349.766	102.425	350.421	97.5354	350.155	100.613	350.12	93.4521	351.841	90.7741	350.274	89.0811	351.339	74.6809
	352.38	107.174	351.275	103.391	350.766	101.766	351.421	97.5556	351.155	99.9584	351.12	92.7027	352.841	91.6803	351.274	89.4009	352.339	74.5027
	353.38	107.813	352.275	104.228	351.766	101.828	352.421	98.0179	352.155	100.621	352.12	93.0225	353.841	91.476	352.274	89.3255	353.339	74.7017
	354.38	107.864	353.275	102.905	352.766	101.749	353.421	98.3276	353.155	100.95	353.12	92.7769	354.841	90.8386	353.274	90.0611	354.339	74.7325
	355.38	107.467	354.275	102.985	353.766	102.412	354.421	97.9731	354.155	101.507	354.12	92.4379	355.841	91.8646	354.274	89.8522	355.339	74.5909
	356.38	107.509	355.275	102.081	354.766	101.884	355.421	98.7081	355.155	100.429	355.12	92.9589	356.841	91.4934	355.274	89.6598	356.339	72.7992
	357.38	107.303	356.275	103.128	355.766	101.592	356.421	97.5644	356.155	101.191	356.12	93.1218	357.841	91.2358	356.274	89.4551	357.339	74.9433
	358.38	108.017	357.275	104.066	356.766	102.905	357.421	98.4336	357.155	100.994	357.12	93.2639	358.841	91.7393	357.274	89.3455	358.339	73.7126
	359.38	107.087	358.275	102.893	357.766	102.092	358.421	98.754	358.155	99.7737	358.12	92.6137	359.841	91.2636	358.274	89.0601	359.339	74.4814
	360.38	107.798	359.275	104.581	358.766	103.211	359.421	98.283	359.155	100.672	359.12	93.5427	360.841	90.7699	359.274	88.6415	360.339	75.2475
	361.38	107.463	360.275	104.649	359.766	101.824	360.421	97.6236	360.155	101.229	360.12	92.805	361.841	91.9501	360.274	90.5066	361.339	74.0728
	362.38	107.537	361.275	102.401	360.766	102.224	361.421	97.8862	361.155	101.714	361.12	93.7755	362.841	91.9141	361.274	88.9865	362.339	73.8087
	363.38	107.621	362.275	102.596	361.766	101.962	362.421	98.7344	362.155	100.962	362.12	93.7917	363.841	91.9708	362.274	89.1543	363.339	74.9343
	364.38	107.385	363.275	102.987	362.766	102.468	363.421	97.6089	363.155	100.603	363.12	93.4979	364.841	91.8983	363.274	89.4182	364.339	74.9444
	365.38	107.83	364.275	103.576	363.766	102.949	364.421	98.0735	364.155	101.355	364.12	93.5998	365.841	90.8765	364.274	89.3303	365.339	74.4839
	366.38	107.992	365.275	104.39	364.766	103.667	365.421	98.5069	365.155	101.257	365.12	93.4535	366.841	91.2666	365.274	89.7146	366.339	74.4469
	367.38	107.929	366.275	103.305	365.766	102.403	366.421	98.9774	366.155	101.453	366.12	93.021	367.841	91.2138	366.274	89.3518	367.339	74.4129
	368.38	107.944	367.275	103.77	366.766	101.982	367.421	98.4766	367.155	101.497	367.12	93.079	368.841	90.8721	367.274	89.0309	368.339	75.1071
	369.38	108.123	368.275	103.46	367.766	103.174	368.421	98.7747	368.155	99.2014	368.12	93.906	369.841	91.1951	368.274	89.0849	369.339	75.075
	370.38	108.452	369.275	104.47	368.766	103.405	369.421	98.5034	369.155	100.738	369.12	94.3322	370.841	91.548	369.274	88.9991	370.339	74.713
	371.38	108.033	370.275	103.062	369.766	104.029	370.421	98.3222	370.155	101.333	370.12	93.7896	371.841	90.4913	370.274	89.787	371.339	75.3578
	372.38	107.976	371.275	104.651	370.766	102.389	371.421	98.7747	371.155	101.778	371.12	93.0677	372.841	91.1272	371.274	90.6658	372.339	75.006
	373.38	108.003	372.275	104.685	371.766	103.077	372.421	98.8563	372.155	99.931	372.12	92.533	373.841	91.0871	372.274	89.0738	373.339	75.0714
	374.38	108.369	373.275	103.446	372.766	103.274	373.421	98.953	373.155	100.53	373.12	94.2667	374.841	91.6138	373.274	89.385	374.339	74.7334
	375.38	108.711	374.275	103.862	373.766	103.969	374.421	98.2077	374.155	101.863	374.12	94.6797	375.841	90.8926	374.274	89.386	375.339	73.8537
	376.38	108.337	375.275	103.847	374.766	103.241	375.421	98.2146	375.155	101.509	375.12	93.4666	376.841	91.3162	375.274	89.1714	376.339	74.5852
	377.38	107.71	376.275	105.418	375.766	102.81	376.421	99.5283	376.155	102.098	376.12	93.7092	377.841	91.84	376.274	89.1579	377.339	74.8063
	378.38	109.16	377.275	104.938	376.766	103.069	377.421	98.674	377.155	101.33	377.12	93.6899	378.841	91.6787	377.274	89.7523	378.339	74.5797
	379.38	108.833	378.275	104.131	377.766	103.017	378.421	99.8719	378.155	101.038	378.12	92.7549	379.841	91.0351	378.274	90.0156	379.339	74.3634
	380.38	109.566	379.275	103.822	378.766	103.281	379.421	99.1534	379.155	102.862	379.12	93.0305	380.841	91.8695	379.274	89.3478	380.339	74.1707
	381.38	108.371	380.275	104.767	379.766	103.492	380.421	98.9347	380.155	101.212	380.12	93.8726	381.841	92.4439	380.274	89.6866	381.339	75.0414
	382.38	109.525	381.275	104.315	380.766	102.613	381.421	99.5617	381.155	101.859	381.12	93.1586	382.841	91.3382	381.274	89.9296	382.339	74.4897
	383.38	107.992	382.275	104.872	381.766	103.684	382.421	98.8464	382.155	101.793	382.12	93.9463	383.841	91.4538	382.274	89.0769	383.339	74.7972
	384.38	109.311	383.275	104.639	382.766	103.646	383.421	99.9445	383.155	101.506	383.12	93.2383	384.841	91.556	383.274	89.4551	384.339	74.2965
	385.38	109.346	384.275	104.997	383.766	103.631	384.421	99.43	384.155	101.782	384.12	93.633	385.841	92.2669	384.274	89.6822	385.339	74.3811
	386.38	108.999	385.275	103.723	384.766	104.124	385.421	99.2173	385.155	101.532	385.12	93.8541	386.841	90.654	385.274	89.2011	386.339	74.8462
	387.38	109.867	386.275	104.391	385.766	103.821	386.421	99.4131	386.155	101.328	386.12	92.9191	387.841	91.7234	386.274	89.5225	387.339	74.1872
	388.38	108.727	387.275	105.452	386.766	103.62	387.421	99.1145	387.155	101.863	387.12	93.127	388.841	91.8353	387.274	88.7833	388.339	74.738
	389.38	108.561	388.275	105.184	387.766	104.143	388.421	99.9393	388.155	101.608	388.12	93.5052	389.841	90.8804	388.274	89.2091	389.339	74.0122
	390.38	109.375	389.275	104.884	388.766	104.21	389.421	99.2405	389.155	102.214	389.12	93.4647	390.841	90.5541	389.274	89.9553	390.339	74.5571
	391.38	109.32	390.275	104.987	389.766	103.146	390.421	99.8651	390.155	101.84	390.12	93.1378	391.841	91.1316	390.274	89.2731	391.339	74.0434
	392.38	109.564	391.275	105.168	390.766	104.641	391.421	99.8403	391.155	102.326	391.12	94.1524	392.841	91.8108	391.274	89.8654	392.339	74.8199
	393.38	109.497	392.275	105.717	391.766	103.549	392.421	100.002	392.155	101.379	392.12	93.6824	393.841	92.5649	392.274	90.0457	393.339	73.8456
	394.38	108.965	393.275	105.639	392.766	104.272	393.421	99.3838	393.155	102.065	393.12	93.9604	394.841	91.1778	393.274	89.5538	394.339	74.8305
	395.38	109.832	394.275	104.95	393.766	104.046	394.421	99.4709	394.155	102.627	394.12	94.6163	395.841	90.4355	394.274	88.9923	395.339	75.1937
	396.38	109.212	395.275	105.713	394.766	104.313	395.421	99.8772	395.155	100.928	395.12	93.728	396.841	91.2533	395.274	89.2126	396.339	75.3304
	397.38	109.28	396.275	104.494	395.766	103.482	396.421	99.3334	396.155	101.487	396.12	93.5535	397.841	91.2022	396.274	89.4807	397.339	75.0151
	398.38	110.434	397.275	105.666	396.766	103.392	397.421	100.499	397.155	102.41	397.12	93.5686	398.841	91.7188	397.274	90.0139	398.339	74.7995
	399.38	110.355	398.275	105.093	397.766	105.462	398.421	99.6001	398.155	101.701	398.12	93.0911	399.841	90.4295	398.274	89.4531	399.339	74.4411
	400.38	110.124	399.275	105.417	398.766	103.858	399.421	99.0311	399.155	102.011	399.12	93.4331	400.841	91.4195	399.274	89.5509	400.339	74.4216
	401.38	110.388	400.275	105.041	399.766	104.48	400.421	99.7366	400.155	101.547	400.12	94.1368	401.841	91.6889	400.274	89.1817	401.339	74.852
	402.38	109.105	401.275	105.863	400.766	104.588	401.421	100.874	401.155	101.632	401.12	93.942	402.841	91.407	401.274	89.832	402.339	75.067
	403.38	109.393	402.275	105.021	401.766	104.866	402.421	100.025	402.155	101.76	402.12	93.5356	403.841	92.0399	402.274	89.4731	403.339	75.4135
	404.38	110.128	403.275	106.552	402.766	104.675	403.421	100.267	403.155	102.503	403.12	93.7783	404.841	91.0564	403.274	90.1469	404.339	73.9981
	405.38	110.276	404.275	105.041	403.766	103.987	404.421	99.2385	404.155	101.949	404.12	94.2453	405.841	91.9797	404.274	90.0976	405.339	74.1714
	406.38	111.118	405.275	105.33	404.766	104.328	405.421	100.592	405.155	101.676	405.12	93.2281	406.841	90.6	405.274	90.0722	406.339	74.0429
	407.38	110.469	406.275	106.372	405.766	103.812	406.421	99.9412	406.155	101.971	406.12	93.8208	407.841	90.98	406.274	89.4738	407.339	74.7979
	408.38	110.306	407.275	105.904	406.766	105.34	407.421	99.6464	407.155	101.591	407.12	93.5219	408.841	91.4359	407.274	89.6801	408.339	75.5725
	409.38	110.922	408.275	105.915	407.766	105.123	408.421	100.257	408.155	101.746	408.12	94.0138	409.841	91.913	408.274	89.378	409.339	75.0122
	410.38	110.665	409.275	105.471	408.766	105.535	409.421	100.119	409.155	100.469	409.12	93.8095	410.841	90.6145	409.274	90.1995	410.339	75.4397
	411.38	110.58	410.275	106.185	409.766	104.691	410.421	100.05	410.155	102.699	410.12	93.7729	411.841	91.8647	410.274	89.1542	411.339	74.0202
	412.38	110.769	411.275	106.727	410.766	104.851	411.421	100.49	411.155	102.919	411.12	93.9436	412.841	91.0503	411.274	89.8247	412.339	75.4069
	413.38	111.011	412.275	106.392	411.766	105.054	412.421	100.846	412.155	102.502	412.12	93.479	413.841	91.0877	412.274	88.7587	413.339	74.069
	414.38	110.621	413.275	105.938	412.766	105.621	413.421	99.7582	413.155	102.189	413.12	93.6236	414.841	91.2353	413.274	90.0392	414.339	74.6684
	415.38	110.452	414.275	105.532	413.766	104.724	414.421	100.402	414.155	102.772	414.12	94.4354	415.841	91.5458	414.274	89.7041	415.339	74.7659
	416.38	110.807	415.275	106.63	414.766	104.89	415.421	100.395	415.155	102.797	415.12	93.348	416.841	91.7251	415.274	89.4205	416.339	74.3625
	417.38	109.62	416.275	106.345	415.766	105.066	416.421	99.7578	416.155	102.097	416.12	94.4543	417.841	91.7188	416.274	89.158	417.339	74.6512
	418.38	111.47	417.275	105.819	416.766	105.093	417.421	100.674	417.155	102.336	417.12	93.8347	418.841	92.1917	417.274	89.9199	418.339	74.3549
	419.38	110.52	418.275	106.412	417.766	105.159	418.421	100.782	418.155	101.68	418.12	93.4339	419.841	91.2026	418.274	90.428	419.339	75.0886
	420.38	111.71	419.275	106.493	418.766	104.294	419.421	100.011	419.155	103.267	419.12	95.4984	420.841	92.1967	419.274	90.1162	420.339	74.6545
	421.38	110.154	420.275	107.261	419.766	105.477	420.421	100.315	420.155	102.62	420.12	94.0265	421.841	91.7876	420.274	89.1378	421.339	74.7154
	422.38	111.835	421.275	105.109	420.766	105.978	421.421	101.712	421.155	103.198	421.12	93.9848	422.841	90.8507	421.274	89.1507	422.339	75.1779
	423.38	111.628	422.275	105.61	421.766	105.516	422.421	101.04	422.155	102.096	422.12	94.6598	423.841	92.28	422.274	89.6971	423.339	73.9816
	424.38	110.411	423.275	104.556	422.766	106.178	423.421	100.026	423.155	101.728	423.12	94.6843	424.841	92.2538	423.274	90.0132	424.339	74.281
	425.38	111.577	424.275	106.929	423.766	105.492	424.421	101.021	424.155	102.463	424.12	93.9629	425.841	91.9876	424.274	90.5303	425.339	75.0547
	426.38	112.145	425.275	106.25	424.766	105.73	425.421	100.406	425.155	103.537	425.12	93.6815	426.841	91.1088	425.274	89.7717	426.339	75.4829
	427.38	111.538	426.275	107.422	425.766	105.491	426.421	99.6436	426.155	102.122	426.12	94.0961	427.841	91.1647	426.274	89.8806	427.339	75.3392
	428.38	112.625	427.275	107.877	426.766	106.315	427.421	100.638	427.155	103.425	427.12	94.8758	428.841	91.6529	427.274	88.9937	428.339	74.719
	429.38	111.466	428.275	106.168	427.766	105.794	428.421	100.666	428.155	102.086	428.12	94.398	429.841	92.0271	428.274	89.1561	429.339	74.4961
	430.38	111.764	429.275	106.73	428.766	105.821	429.421	101.351	429.155	102.969	429.12	93.5426	430.841	91.8247	429.274	90.2464	430.339	74.9513
	431.38	111.392	430.275	107.232	429.766	105.549	430.421	101.343	430.155	102.898	430.12	93.6705	431.841	92.4068	430.274	90.4666	431.339	74.4549
	432.38	111.957	431.275	106.753	430.766	106.262	431.421	100.585	431.155	103.235	431.12	93.8912	432.841	91.0244	431.274	89.444	432.339	75.5407
	433.38	111.58	432.275	107.353	431.766	107.038	432.421	100.973	432.155	102.82	432.12	93.0188	433.841	91.4757	432.274	89.4543	433.339	74.5377
	434.38	112.364	433.275	106.592	432.766	105.816	433.421	100.201	433.155	103.402	433.12	93.9197	434.841	90.9716	433.274	89.5718	434.339	74.2627
	435.38	112.266	434.275	106.353	433.766	105.801	434.421	100.448	434.155	102.39	434.12	93.849	435.841	91.8044	434.274	89.4423	435.339	74.4771
	436.38	111.564	435.275	107.026	434.766	106.252	435.421	100.623	435.155	102.863	435.12	93.5994	436.841	91.1708	435.274	90.1303	436.339	75.6555
	437.38	111.462	436.275	106.573	435.766	105.365	436.421	100.543	436.155	103.398	436.12	94.4021	437.841	91.3317	436.274	90.8246	437.339	74.9697
	438.38	112.142	437.275	106.669	436.766	105.272	437.421	100.205	437.155	102.81	437.12	94.4986	438.841	91.745	437.274	89.81	438.339	74.7075
	439.38	112.209	438.275	105.915	437.766	105.207	438.421	101.318	438.155	103.172	438.12	94.7441	439.841	91.9288	438.274	89.7552	439.339	74.0381
	440.38	112.295	439.275	106.686	438.766	107.039	439.421	100.579	439.155	102.647	439.12	93.3323	440.841	91.7071	439.274	89.8032	440.339	75.3288
	441.38	112.27	440.275	107.355	439.766	108.014	440.421	101.176	440.155	103.182	440.12	94.4525	441.841	92.6852	440.274	89.994	441.339	73.9382
	442.38	112.528	441.275	107.512	440.766	105.897	441.421	101.549	441.155	103.261	441.12	93.3244	442.841	91.5756	441.274	90.1741	442.339	74.896
	443.38	112.704	442.275	106.677	441.766	105.777	442.421	101.348	442.155	103.934	442.12	95.4246	443.841	92.199	442.274	90.225	443.339	74.9686
	444.38	113.202	443.275	107.638	442.766	106.103	443.421	101.071	443.155	102.729	443.12	94.6064	444.841	91.9607	443.274	89.899	444.339	74.7245
	445.38	112.246	444.275	107.774	443.766	106.546	444.421	101.72	444.155	103.187	444.12	94.0055	445.841	91.0466	444.274	90.502	445.339	73.6952
	446.38	113.157	445.275	106.509	444.766	106.736	445.421	100.934	445.155	103.951	445.12	95.3559	446.841	91.2793	445.274	89.3915	446.339	74.6704
	447.38	113.285	446.275	107.671	445.766	106.821	446.421	101.308	446.155	103.163	446.12	95.029	447.841	91.2429	446.274	90.4159	447.339	73.9454
	448.38	113.456	447.275	107.561	446.766	106.251	447.421	100.684	447.155	102.531	447.12	94.1152	448.841	91.3196	447.274	89.0107	448.339	74.8233
	449.38	112.147	448.275	107.99	447.766	107.048	448.421	101.052	448.155	103.314	448.12	94.4759	449.841	92.8932	448.274	90.5037	449.339	75.2932
	450.38	113.356	449.275	108.35	448.766	106.696	449.421	101.372	449.155	103.091	449.12	94.0281	450.841	91.776	449.274	90.2135	450.339	73.961
	451.38	112.001	450.275	107.185	449.766	106.732	450.421	100.571	450.155	103.812	450.12	94.9404	451.841	92.0264	450.274	89.1509	451.339	74.3998
	452.38	113.628	451.275	107.574	450.766	106.483	451.421	102.208	451.155	103.003	451.12	94.0361	452.841	91.3786	451.274	90.0619	452.339	73.8669
	453.38	112.918	452.275	107.175	451.766	106.308	452.421	101.081	452.155	103.031	452.12	93.6032	453.841	91.3519	452.274	89.0576	453.339	75.1365
	454.38	113.345	453.275	107.39	452.766	107.013	453.421	101.284	453.155	104.018	453.12	93.2071	454.841	91.4195	453.274	89.0865	454.339	74.5928
	455.38	112.503	454.275	108.098	453.766	107.56	454.421	100.07	454.155	102.499	454.12	94.4988	455.841	91.7949	454.274	89.6321	455.339	74.4175
	456.38	113.665	455.275	108.163	454.766	108.066	455.421	101.85	455.155	103.471	455.12	94.1673	456.841	91.152	455.274	90.2762	456.339	74.3378
	457.38	113.318	456.275	108.504	455.766	107.517	456.421	101.18	456.155	103.342	456.12	94.8704	457.841	92.1504	456.274	90.9932	457.339	75.2467
	458.38	113.129	457.275	108.896	456.766	105.67	457.421	100.912	457.155	102.944	457.12	93.7101	458.841	91.6567	457.274	90.1554	458.339	74.7495
	459.38	114.031	458.275	108.67	457.766	106.764	458.421	101.516	458.155	102.867	458.12	93.9469	459.841	91.6271	458.274	89.9407	459.339	75.1146
	460.38	113.964	459.275	107.89	458.766	107.141	459.421	102.005	459.155	103.302	459.12	95.6338	460.841	92.3037	459.274	90.1565	460.339	74.5622
	461.38	112.862	460.275	107.319	459.766	107.449	460.421	101.504	460.155	103.577	460.12	95.0993	461.841	91.5897	460.274	90.9442	461.339	75.4669
	462.38	113.007	461.275	108.568	460.766	107.179	461.421	101.827	461.155	102.146	461.12	93.6319	462.841	91.7618	461.274	89.9957	462.339	74.7467
	463.38	112.715	462.275	108.789	461.766	107.39	462.421	100.801	462.155	103.042	462.12	94.1119	463.841	92.1967	462.274	89.9135	463.339	75.1051
	464.38	113.241	463.275	108.832	462.766	107.399	463.421	101.826	463.155	103.417	463.12	94.0459	464.841	91.9067	463.274	89.6394	464.339	74.6366
	465.38	113.715	464.275	109.023	463.766	108.075	464.421	101.231	464.155	103.093	464.12	93.9981	465.841	92.1379	464.274	90.4594	465.339	74.4903
	466.38	113.17	465.275	108.577	464.766	108.117	465.421	100.923	465.155	103.051	465.12	94.5026	466.841	90.9074	465.274	90.4418	466.339	74.9035
	467.38	113.492	466.275	108.595	465.766	106.93	466.421	101.712	466.155	104.156	466.12	94.4814	467.841	93.0663	466.274	90.0719	467.339	74.1788
	468.38	113.076	467.275	108.557	466.766	106.725	467.421	101.972	467.155	103.097	467.12	94.6105	468.841	92.6806	467.274	89.8338	468.339	75.2326
	469.38	114.166	468.275	107.91	467.766	106.897	468.421	100.557	468.155	103.725	468.12	94.2113	469.841	90.9704	468.274	90.0357	469.339	74.3822
	470.38	113.73	469.275	107.891	468.766	107.083	469.421	101.876	469.155	103.415	469.12	93.5684	470.841	92.963	469.274	89.6336	470.339	74.2701
	471.38	113.654	470.275	109.17	469.766	107.396	470.421	102.291	470.155	103.418	470.12	94.8267	471.841	92.5756	470.274	89.984	471.339	74.9639
	472.38	112.819	471.275	108	470.766	108.367	471.421	102.344	471.155	103.187	471.12	94.3074	472.841	92.0624	471.274	90.4821	472.339	75.1159
	473.38	113.194	472.275	108.671	471.766	107.199	472.421	102.459	472.155	104.063	472.12	94.166	473.841	91.8234	472.274	89.867	473.339	75.0387
	474.38	114.043	473.275	108.416	472.766	105.741	473.421	102.204	473.155	103.563	473.12	94.2718	474.841	92.2458	473.274	90.2647	474.339	74.8825
	475.38	114.36	474.275	108.732	473.766	108.57	474.421	101.749	474.155	103.537	474.12	94.6437	475.841	91.9557	474.274	90.2626	475.339	74.9502
	476.38	114.075	475.275	108.182	474.766	107.51	475.421	102.167	475.155	103.979	475.12	94.2058	476.841	91.713	475.274	90.2052	476.339	75.1111
	477.38	113.695	476.275	109.196	475.766	107.87	476.421	102.953	476.155	104.64	476.12	94.2632	477.841	91.8081	476.274	90.1364	477.339	74.8203
	478.38	114.242	477.275	108.068	476.766	107.66	477.421	102.268	477.155	103.206	477.12	94.6363	478.841	91.8696	477.274	89.9897	478.339	75.1465
	479.38	113.644	478.275	108.296	477.766	108.285	478.421	102.372	478.155	104.047	478.12	93.7885	479.841	92.7121	478.274	90.4724	479.339	75.0653
	480.38	112.956	479.275	109.521	478.766	108.205	479.421	101.903	479.155	103.468	479.12	93.9387	480.841	92.2654	479.274	89.0421	480.339	74.9575
	481.38	114.047	480.275	109.196	479.766	108.223	480.421	101.868	480.155	103.748	480.12	94.4839	481.841	91.824	480.274	90.3544	481.339	75.0932
	482.38	114.499	481.275	109.564	480.766	107.89	481.421	102.065	481.155	103.945	481.12	94.6031	482.841	92.4694	481.274	89.7341	482.339	74.9489
	483.38	113.58	482.275	110.712	481.766	107.177	482.421	102.383	482.155	102.984	482.12	94.84	483.841	92.1184	482.274	90.7154	483.339	75.5824
	484.38	114.253	483.275	107.991	482.766	108.41	483.421	103.71	483.155	103.644	483.12	94.5341	484.841	91.2947	483.274	90.7406	484.339	74.5777
	485.38	113.991	484.275	108.373	483.766	108.174	484.421	101.873	484.155	103.122	484.12	93.5416	485.841	92.0456	484.274	89.6587	485.339	74.9918
	486.38	114.378	485.275	109.403	484.766	107.613	485.421	103.411	485.155	103.841	485.12	94.3179	486.841	91.8422	485.274	90.0124	486.339	74.6914
	487.38	113.994	486.275	109.089	485.766	107.563	486.421	102.662	486.155	104.496	486.12	94.9993	487.841	92.7428	486.274	89.7569	487.339	75.0072
	488.38	114.097	487.275	109.43	486.766	108.62	487.421	102.498	487.155	103.029	487.12	94.1564	488.841	92.6392	487.274	89.6749	488.339	74.2234
	489.38	115.096	488.275	109.06	487.766	108.829	488.421	101.803	488.155	103.506	488.12	94.2319	489.841	91.7867	488.274	90.7064	489.339	74.9211
	490.38	113.913	489.275	108.23	488.766	107.55	489.421	102.178	489.155	103.57	489.12	93.9194	490.841	92.1252	489.274	89.4071	490.339	74.658
	491.38	114.471	490.275	108.612	489.766	108.652	490.421	101.954	490.155	103.748	490.12	94.2963	491.841	91.5143	490.274	88.7181	491.339	74.7187
	492.38	114.692	491.275	109.729	490.766	107.902	491.421	102.131	491.155	104.188	491.12	94.0321	492.841	92.076	491.274	90.0885	492.339	74.0862
	493.38	114.753	492.275	108.646	491.766	107.403	492.421	102.386	492.155	104.319	492.12	94.9081	493.841	92.0085	492.274	90.0957	493.339	74.8292
	494.38	114.7	493.275	110.418	492.766	108.196	493.421	103.011	493.155	104.27	493.12	95.2099	494.841	92.5438	493.274	91.2348	494.339	73.9931
	495.38	114.031	494.275	109.225	493.766	108.321	494.421	101.416	494.155	104.471	494.12	94.8918	495.841	92.0806	494.274	89.9334	495.339	74.3955
	496.38	114.207	495.275	108.558	494.766	109.033	495.421	102.651	495.155	104.395	495.12	94.8159	496.841	92.9157	495.274	89.7065	496.339	74.2056
	497.38	114.2	496.275	109.573	495.766	107.166	496.421	102.682	496.155	103.742	496.12	95.0684	497.841	92.4664	496.274	91.2298	497.339	74.0731
	498.38	115.336	497.275	108.937	496.766	108.123	497.421	103.07	497.155	103.162	497.12	95.5581	498.841	92.63	497.274	89.5699	498.339	75.027
	499.38	113.672	498.275	109.54	497.766	108.597	498.421	101.735	498.155	103.423	498.12	95.5288	499.841	93.0226	498.274	90.437	499.339	73.3794
	500.38	114.971	499.275	110.581	498.766	107.906	499.421	103.668	499.155	103.597	499.12	95.0184	500.841	91.6742	499.274	90.1616	500.339	74.0555
	501.38	113.673	500.275	109.525	499.766	108.246	500.421	101.24	500.155	105.358	500.12	94.491	501.841	91.9192	500.274	90.558	501.339	75.1887
	502.38	113.956	501.275	109.733	500.766	107.843	501.421	102.966	501.155	104.132	501.12	94.2281	502.841	92.2774	501.274	89.3949	502.339	74.0999
	503.38	114.694	502.275	109.207	501.766	109.166	502.421	102.392	502.155	104.766	502.12	96.3983	503.841	92.9105	502.274	91.3585	503.339	74.8623
	504.38	114.409	503.275	109.804	502.766	108.553	503.421	102.768	503.155	104.736	503.12	94.9293	504.841	91.263	503.274	90.8048	504.339	74.4621
	505.38	113.882	504.275	109.933	503.766	109.615	504.421	103.012	504.155	103.618	504.12	94.9406	505.841	90.7357	504.274	90.5702	505.339	74.9651
	506.38	114.682	505.275	108.897	504.766	108.46	505.421	102.506	505.155	104.344	505.12	94.7295	506.841	91.1906	505.274	90.2216	506.339	74.3336
	507.38	114.325	506.275	110.401	505.766	108.465	506.421	103.476	506.155	103.708	506.12	94.817	507.841	92.7184	506.274	89.7559	507.339	74.9625
	508.38	114.986	507.275	110.443	506.766	107.956	507.421	102.661	507.155	104.354	507.12	95.5602	508.841	91.9113	507.274	90.0515	508.339	74.2072
	509.38	114.846	508.275	110.292	507.766	108.67	508.421	102.775	508.155	104.243	508.12	94.4597	509.841	91.9857	508.274	90.4279	509.339	74.8878
	510.38	114.763	509.275	109.722	508.766	108.193	509.421	105.054	509.155	105.49	509.12	95.5394	510.841	92.5333	509.274	89.8956	510.339	74.3777
	511.38	115.357	510.275	109.235	509.766	108.544	510.421	103.226	510.155	104.88	510.12	94.019	511.841	93.0537	510.274	90.9551	511.339	74.4689
	512.38	115.453	511.275	110.215	510.766	109.665	511.421	102.514	511.155	104.382	511.12	94.7354	512.841	91.3697	511.274	90.3224	512.339	74.3342
	513.38	114.84	512.275	109.747	511.766	108.441	512.421	103.937	512.155	104.593	512.12	94.012	513.841	92.6334	512.274	90.8914	513.339	74.6284
	514.38	115.634	513.275	111.111	512.766	109.298	513.421	102.342	513.155	104.241	513.12	93.4897	514.841	91.6848	513.274	89.5636	514.339	74.8647
	515.38	115.037	514.275	110.366	513.766	109.05	514.421	103.264	514.155	103.709	514.12	93.6687	515.841	92.0028	514.274	90.3785	515.339	75.3551
	516.38	115.312	515.275	110.397	514.766	107.833	515.421	103.407	515.155	105.019	515.12	94.5916	516.841	91.6619	515.274	90.892	516.339	75.3176
	517.38	114.484	516.275	109.788	515.766	109.351	516.421	103.607	516.155	104.303	516.12	94.4857	517.841	91.8015	516.274	89.8682	517.339	75.102
	518.38	115.186	517.275	109.873	516.766	109.243	517.421	103.498	517.155	103.905	517.12	94.6004	518.841	91.5417	517.274	89.3831	518.339	73.4195
	519.38	115.951	518.275	110.671	517.766	109.43	518.421	104.195	518.155	104.78	518.12	95.2115	519.841	92.2545	518.274	89.6809	519.339	74.2428
	520.38	115.378	519.275	110.457	518.766	108.102	519.421	103.702	519.155	105.294	519.12	95.6429	520.841	91.3086	519.274	89.5518	520.339	74.3465
	521.38	115.448	520.275	110.128	519.766	109.544	520.421	103.212	520.155	104.568	520.12	95.3761	521.841	92.1595	520.274	89.8308	521.339	75.0243
	522.38	115.487	521.275	110.996	520.766	108.943	521.421	102.808	521.155	104.745	521.12	95.1108	522.841	91.7767	521.274	89.8975	522.339	75.1142
	523.38	116.288	522.275	109.722	521.766	109.134	522.421	104.595	522.155	105.539	522.12	95.204	523.841	91.8309	522.274	90.1858	523.339	75.0431
	524.38	115.761	523.275	109.512	522.766	109.223	523.421	103.791	523.155	103.958	523.12	94.451	524.841	91.985	523.274	89.7608	524.339	74.4782
	525.38	116.087	524.275	112.04	523.766	109.034	524.421	103.474	524.155	105.609	524.12	96.439	525.841	91.8345	524.274	90.2158	525.339	74.9286
	526.38	115.225	525.275	109.585	524.766	108.366	525.421	102.682	525.155	103.954	525.12	95.39	526.841	91.4954	525.274	90.5462	526.339	74.55
	527.38	115.816	526.275	110.453	525.766	108.982	526.421	103.373	526.155	105.499	526.12	95.0693	527.841	92.3519	526.274	90.4509	527.339	73.997
	528.38	115.089	527.275	110.025	526.766	109.42	527.421	103.48	527.155	104.043	527.12	94.7232	528.841	92.2022	527.274	89.8831	528.339	74.5359
	529.38	115.575	528.275	109.242	527.766	109.672	528.421	104.11	528.155	105.526	528.12	95.0506	529.841	91.3787	528.274	89.1557	529.339	74.5599
	530.38	115.998	529.275	110.293	528.766	110.356	529.421	103.091	529.155	105.692	529.12	94.53	530.841	92.221	529.274	89.6449	530.339	73.536
	531.38	117.151	530.275	110.691	529.766	108.681	530.421	103.468	530.155	103.648	530.12	95.8498	531.841	92.0619	530.274	90.0378	531.339	75.024
	532.38	116.822	531.275	110.608	530.766	109.348	531.421	104.516	531.155	105.076	531.12	94.7916	532.841	91.6403	531.274	91.2772	532.339	74.2518
	533.38	116.634	532.275	110.672	531.766	109.805	532.421	103.668	532.155	104.394	532.12	94.9104	533.841	91.5082	532.274	90.1209	533.339	74.2262
	534.38	115.083	533.275	111.06	532.766	109.049	533.421	104.418	533.155	104.642	533.12	95.0212	534.841	92.0693	533.274	90.1489	534.339	74.7936
	535.38	115.744	534.275	110.912	533.766	110.109	534.421	103.109	534.155	105.35	534.12	95.2702	535.841	91.343	534.274	90.1594	535.339	74.4201
	536.38	115.955	535.275	110.988	534.766	109.09	535.421	104.361	535.155	105.426	535.12	95.6876	536.841	91.9355	535.274	89.8483	536.339	74.9735
	537.38	116.71	536.275	110.528	535.766	110.693	536.421	104.395	536.155	104.876	536.12	95.6885	537.841	91.8978	536.274	90.0376	537.339	74.1983
	538.38	116.063	537.275	109.933	536.766	109.03	537.421	103.58	537.155	104.941	537.12	95.403	538.841	91.8392	537.274	89.4583	538.339	74.6821
	539.38	117.343	538.275	111.613	537.766	109.516	538.421	105.081	538.155	106.25	538.12	95.3989	539.841	91.1677	538.274	89.5818	539.339	74.6031
	540.38	115.934	539.275	109.924	538.766	109.437	539.421	104.62	539.155	104.994	539.12	95.7084	540.841	90.6921	539.274	90.0782	540.339	74.963
	541.38	115.896	540.275	110.661	539.766	109.032	540.421	103.939	540.155	104.367	540.12	95.6165	541.841	92.0632	540.274	90.0636	541.339	75.1946
	542.38	115.935	541.275	111.299	540.766	109.633	541.421	103.035	541.155	104.849	541.12	95.9838	542.841	92.5575	541.274	89.9477	542.339	74.2684
	543.38	116.528	542.275	111.182	541.766	109.236	542.421	104.906	542.155	105.751	542.12	95.0807	543.841	92.3656	542.274	90.7376	543.339	74.9568
	544.38	117.773	543.275	111.381	542.766	109.163	543.421	104.65	543.155	105.439	543.12	95.2507	544.841	91.7632	543.274	89.8892	544.339	75.455
	545.38	117.821	544.275	111.893	543.766	109.436	544.421	104.154	544.155	105.938	544.12	94.377	545.841	91.4051	544.274	89.4538	545.339	75.1889
	546.38	115.595	545.275	112.295	544.766	109.988	545.421	104.426	545.155	105.413	545.12	95.3529	546.841	92.7356	545.274	90.4118	546.339	73.4527
	547.38	115.832	546.275	111.039	545.766	110.669	546.421	104.351	546.155	104.916	546.12	95.0243	547.841	91.3886	546.274	91.133	547.339	74.6676
	548.38	116.305	547.275	111.561	546.766	109.842	547.421	103.918	547.155	106.742	547.12	94.4747	548.841	91.9685	547.274	89.8455	548.339	74.4447
	549.38	116.222	548.275	110.996	547.766	109.771	548.421	104.212	548.155	104.759	548.12	95.156	549.841	91.9117	548.274	90.524	549.339	74.7513
	550.38	116.236	549.275	111.821	548.766	110.028	549.421	104.891	549.155	104.396	549.12	95.99	550.841	92.0768	549.274	89.408	550.339	73.6353
	551.38	116.634	550.275	111.925	549.766	110.002	550.421	104.717	550.155	105.375	550.12	95.0956	551.841	91.6427	550.274	89.8683	551.339	74.129
	552.38	117.032	551.275	110.25	550.766	109.671	551.421	104.49	551.155	104.628	551.12	94.5589	552.841	92.6559	551.274	90.1196	552.339	73.9572
	553.38	116.733	552.275	112.698	551.766	109.056	552.421	104.547	552.155	104.982	552.12	94.6474	553.841	92.0138	552.274	89.1876	553.339	74.4258
	554.38	116.76	553.275	110.862	552.766	109.847	553.421	105.251	553.155	105.328	553.12	94.5141	554.841	92.1651	553.274	89.957	554.339	74.4215
	555.38	117.081	554.275	112.312	553.766	109.838	554.421	105.356	554.155	105.718	554.12	95.6207	555.841	92.2333	554.274	90.0739	555.339	74.4023
	556.38	116.246	555.275	111.084	554.766	110.354	555.421	104.55	555.155	105.568	555.12	95.6951	556.841	91.8312	555.274	90.2521	556.339	74.6884
	557.38	117.985	556.275	111.653	555.766	110.239	556.421	104.76	556.155	105.052	556.12	95.0392	557.841	90.9948	556.274	89.6832	557.339	75.5043
	558.38	116.978	557.275	112.058	556.766	109.862	557.421	105.8	557.155	104.384	557.12	94.7864	558.841	92.0499	557.274	90.3935	558.339	74.281
	559.38	116.523	558.275	111.34	557.766	109.683	558.421	104.836	558.155	104.794	558.12	94.8323	559.841	92.5618	558.274	90.4964	559.339	75.3767
	560.38	115.97	559.275	111.59	558.766	109.724	559.421	105.833	559.155	105.811	559.12	94.6391	560.841	93.211	559.274	90.5912	560.339	74.9246
	561.38	115.874	560.275	111.66	559.766	109.801	560.421	106.757	560.155	106.639	560.12	95.1425	561.841	92.0782	560.274	89.3589	561.339	74.8513
	562.38	117.612	561.275	112.007	560.766	110.815	561.421	104.697	561.155	106.083	561.12	95.5764	562.841	93.4031	561.274	89.5127	562.339	74.3096
	563.38	117.226	562.275	111.324	561.766	109.284	562.421	104.908	562.155	105.512	562.12	94.9767	563.841	91.5762	562.274	89.8652	563.339	74.5234
	564.38	117.674	563.275	111.941	562.766	110.4	563.421	105.009	563.155	105.817	563.12	95.8348	564.841	92.0374	563.274	91.0552	564.339	74.2497
	565.38	118.243	564.275	111.908	563.766	111.394	564.421	104.389	564.155	106.372	564.12	94.9916	565.841	92.4849	564.274	89.4459	565.339	74.971
	566.38	116.382	565.275	111.84	564.766	110.655	565.421	104.603	565.155	106.871	565.12	95.7246	566.841	92.1419	565.274	90.4431	566.339	74.796
	567.38	117.618	566.275	112.632	565.766	109.828	566.421	105.971	566.155	106.143	566.12	95.8598	567.841	92.1003	566.274	90.7639	567.339	74.2423
	568.38	117.226	567.275	112.761	566.766	110.406	567.421	105.219	567.155	105.859	567.12	94.5656	568.841	91.2425	567.274	90.9836	568.339	75.4684
	569.38	117.495	568.275	112.295	567.766	110.45	568.421	105.384	568.155	106.08	568.12	95.4302	569.841	91.7151	568.274	90.0495	569.339	73.3929
	570.38	116.871	569.275	111.635	568.766	110.209	569.421	105.202	569.155	105.247	569.12	94.8679	570.841	92.0476	569.274	90.1297	570.339	75.1267
	571.38	117.572	570.275	111.427	569.766	110.661	570.421	105.452	570.155	105.552	570.12	95.2442	571.841	91.34	570.274	90.4972	571.339	74.0865
	572.38	117.364	571.275	112.796	570.766	111.15	571.421	104.555	571.155	105.65	571.12	93.9294	572.841	92.509	571.274	89.9075	572.339	74.3887
	573.38	117.035	572.275	112.826	571.766	110.939	572.421	104.881	572.155	104.723	572.12	95.6464	573.841	92.0153	572.274	90.1676	573.339	74.9936
	574.38	117.443	573.275	111.481	572.766	110.185	573.421	104.363	573.155	105.747	573.12	95.8325	574.841	93.1591	573.274	89.4783	574.339	73.9865
	575.38	117.968	574.275	112.675	573.766	110.19	574.421	105.899	574.155	106.334	574.12	95.7068	575.841	92.2518	574.274	90.0897	575.339	74.2399
	576.38	117.126	575.275	113.111	574.766	110.408	575.421	105.936	575.155	105.557	575.12	95.1044	576.841	91.4343	575.274	90.5723	576.339	74.2734
	577.38	117.427	576.275	112.471	575.766	110.183	576.421	105.395	576.155	105.678	576.12	96.0458	577.841	92.3124	576.274	89.8668	577.339	74.9953
	578.38	117.89	577.275	112.97	576.766	110.294	577.421	105.353	577.155	106.532	577.12	96.1053	578.841	92.3218	577.274	89.6844	578.339	74.4907
	579.38	117.478	578.275	112.661	577.766	111.121	578.421	104.563	578.155	107.554	578.12	95.6412	579.841	92.6783	578.274	91.0018	579.339	75.2902
	580.38	117.549	579.275	112.701	578.766	111.821	579.421	104.343	579.155	106.871	579.12	95.5868	580.841	92.4549	579.274	90.9026	580.339	75.2813
	581.38	117.35	580.275	113.511	579.766	110.82	580.421	105.555	580.155	105.614	580.12	94.7353	581.841	93.0503	580.274	90.5588	581.339	74.9223
	582.38	117.925	581.275	111.755	580.766	110.896	581.421	106.929	581.155	105.456	581.12	95.7698	582.841	92.7593	581.274	89.8614	582.339	74.6272
	583.38	118.643	582.275	112.41	581.766	110.72	582.421	105.198	582.155	107.376	582.12	94.7884	583.841	91.6936	582.274	89.7492	583.339	75.5417
	584.38	117.666	583.275	113.12	582.766	110.952	583.421	104.67	583.155	105.827	583.12	95.5254	584.841	92.205	583.274	90.0828	584.339	74.5929
	585.38	117.669	584.275	112.746	583.766	111.363	584.421	104.63	584.155	105.404	584.12	95.2632	585.841	92.3255	584.274	90.7305	585.339	74.4745
	586.38	117.43	585.275	112.653	584.766	109.978	585.421	105.637	585.155	105.14	585.12	95.0878	586.841	91.7259	585.274	90.7194	586.339	74.7715
	587.38	117.968	586.275	113.127	585.766	110.666	586.421	106.575	586.155	106.667	586.12	96.0148	587.841	91.7519	586.274	89.4178	587.339	74.8632
	588.38	116.646	587.275	112.975	586.766	110.185	587.421	106.134	587.155	106.394	587.12	94.9766	588.841	92.6907	587.274	91.2095	588.339	75.6173
	589.38	118.717	588.275	113.168	587.766	111.412	588.421	105.686	588.155	106.849	588.12	95.8112	589.841	91.7117	588.274	90.513	589.339	74.7033
	590.38	119.138	589.275	112.325	588.766	110.403	589.421	107.033	589.155	107.067	589.12	94.5834	590.841	92.1247	589.274	90.1812	590.339	75.358
	591.38	118.258	590.275	113.194	589.766	111.58	590.421	105.848	590.155	106.969	590.12	95.4556	591.841	92.3567	590.274	89.7622	591.339	74.6544
	592.38	118.278	591.275	113.273	590.766	111.415	591.421	105.885	591.155	106.014	591.12	95.3455	592.841	92.5079	591.274	89.9485	592.339	74.4344
	593.38	118.231	592.275	112.756	591.766	110.62	592.421	105.565	592.155	106.599	592.12	96.1354	593.841	93.1057	592.274	90.5511	593.339	74.5876
	594.38	119.026	593.275	113.466	592.766	111.352	593.421	104.765	593.155	106.537	593.12	95.7316	594.841	91.6563	593.274	90.0038	594.339	74.7577
	595.38	117.931	594.275	112.845	593.766	111.746	594.421	105.643	594.155	106.252	594.12	95.1374	595.841	92.3533	594.274	90.3917	595.339	74.8195
	596.38	118.182	595.275	114.011	594.766	110.748	595.421	105.302	595.155	106.536	595.12	95.6484	596.841	93.1077	595.274	90.0455	596.339	74.0649
	597.38	117.887	596.275	114.255	595.766	111.531	596.421	105.598	596.155	106.356	596.12	96.2602	597.841	91.6527	596.274	90.3799	597.339	74.6959
	598.38	118.49	597.275	112.934	596.766	110.782	597.421	106.551	597.155	106.005	597.12	96.0879	598.841	92.4914	597.274	90.1203	598.339	74.2258
	599.38	117.675	598.275	112.764	597.766	111.354	598.421	105.695	598.155	106.51	598.12	96.1971	599.841	92.893	598.274	90.6432	599.339	74.6341
	600.38	118.611	599.275	113.367	598.766	112.409	599.421	105.988	599.155	106.296	599.12	95.5643	600.841	91.2209	599.274	90.2784	600.339	74.4265
	601.38	118.496	600.275	113.266	599.766	111.763	600.421	105.6	600.155	106.255	600.12	95.6264	601.841	91.7985	600.274	90.3733	601.339	74.5299
	602.38	118.058	601.275	114.087	600.766	110.996	601.421	106.23	601.155	107.61	601.12	95.3088	602.841	92.0774	601.274	89.8838	602.339	74.5443
	603.38	118.767	602.275	112.835	601.766	110.949	602.421	106.324	602.155	107.21	602.12	95.1844	603.841	92.842	602.274	89.5744	603.339	74.5701
	604.38	119.011	603.275	113.308	602.766	111.166	603.421	105.593	603.155	105.094	603.12	95.13	604.841	91.8725	603.274	89.9007	604.339	74.6907
	605.38	118.381	604.275	113.97	603.766	111.144	604.421	105.852	604.155	106.373	604.12	95.7001	605.841	92.765	604.274	90.8144	605.339	75.6409
	606.38	118.76	605.275	112.727	604.766	112.076	605.421	106.344	605.155	107.04	605.12	96.074	606.841	91.8409	605.274	89.3707	606.339	74.972
	607.38	118.932	606.275	114.082	605.766	111.237	606.421	105.862	606.155	106.799	606.12	95.3396	607.841	92.7785	606.274	90.4017	607.339	74.0486
	608.38	119.613	607.275	113.984	606.766	112.487	607.421	106.09	607.155	106.776	607.12	95.6203	608.841	92.8961	607.274	91.2537	608.339	74.7834
	609.38	118.381	608.275	113.532	607.766	112.166	608.421	106.096	608.155	107.198	608.12	95.3668	609.841	92.8473	608.274	90.4366	609.339	74.1184
	610.38	119.306	609.275	114.285	608.766	112.585	609.421	106.449	609.155	106.609	609.12	95.3985	610.841	91.7842	609.274	90.4167	610.339	75.0913
	611.38	119.198	610.275	114.331	609.766	112.541	610.421	105.478	610.155	107.263	610.12	96.0308	611.841	91.9724	610.274	90.4946	611.339	74.9685
	612.38	118.251	611.275	113.371	610.766	111.77	611.421	106.234	611.155	106.908	611.12	95.5854	612.841	92.3504	611.274	90.1646	612.339	75.8954
	613.38	119.052	612.275	113.29	611.766	112.422	612.421	105.827	612.155	105.314	612.12	95.1231	613.841	93.5034	612.274	90.1439	613.339	75.3952
	614.38	118.297	613.275	114.147	612.766	111.164	613.421	106.323	613.155	106.751	613.12	96.4931	614.841	92.1169	613.274	91.0568	614.339	74.4749
	615.38	119.526	614.275	114.403	613.766	112.549	614.421	105.699	614.155	105.658	614.12	96.2017	615.841	92.6409	614.274	89.5256	615.339	74.1117
	616.38	119.28	615.275	113.327	614.766	112.211	615.421	107.304	615.155	106.456	615.12	95.1591	616.841	92.2485	615.274	90.3012	616.339	74.5935
	617.38	119.846	616.275	113.838	615.766	111.786	616.421	106.718	616.155	105.583	616.12	96.4134	617.841	92.241	616.274	90.412	617.339	75.414
	618.38	119.305	617.275	114.31	616.766	112.337	617.421	106.25	617.155	105.749	617.12	96.2559	618.841	92.4446	617.274	90.4213	618.339	74.8387
	619.38	119.063	618.275	113.345	617.766	111.765	618.421	107.124	618.155	107.355	618.12	95.7909	619.841	92.8013	618.274	90.1467	619.339	74.6458
	620.38	119.404	619.275	114.776	618.766	111.832	619.421	106.164	619.155	107.034	619.12	95.1793	620.841	92.2891	619.274	90.8394	620.339	75.6867
	621.38	119.629	620.275	114.381	619.766	112.434	620.421	107.23	620.155	106.258	620.12	95.4288	621.841	92.3828	620.274	90.1128	621.339	74.9302
	622.38	119.212	621.275	114.848	620.766	111.575	621.421	106.21	621.155	106.732	621.12	95.4698	622.841	92.1078	621.274	90.2943	622.339	74.6908
	623.38	119.445	622.275	114.386	621.766	112.04	622.421	107.58	622.155	107.121	622.12	96.1819	623.841	92.6746	622.274	91.0128	623.339	74.589
	624.38	119.383	623.275	114.069	622.766	111.675	623.421	106.77	623.155	107.024	623.12	95.7148	624.841	92.6575	623.274	90.1814	624.339	74.7296
	625.38	118.98	624.275	113.573	623.766	112.139	624.421	106.445	624.155	107.22	624.12	95.8916	625.841	92.6903	624.274	89.6947	625.339	74.3276
	626.38	118.603	625.275	114.01	624.766	112.152	625.421	106.941	625.155	106.806	625.12	96.0654	626.841	92.5792	625.274	89.9841	626.339	74.76
	627.38	120.477	626.275	113.55	625.766	111.08	626.421	106.87	626.155	105.822	626.12	95.2781	627.841	93.2598	626.274	90.7929	627.339	74.4421
	628.38	119.764	627.275	114.705	626.766	112.428	627.421	107.619	627.155	106.506	627.12	96.7375	628.841	92.1763	627.274	90.9412	628.339	74.892
	629.38	118.631	628.275	114.951	627.766	112.472	628.421	105.929	628.155	106.534	628.12	95.702	629.841	93.0635	628.274	90.1935	629.339	74.8919
	630.38	118.871	629.275	113.744	628.766	113.313	629.421	106.721	629.155	107.148	629.12	96.2698	630.841	91.4742	629.274	90.5726	630.339	74.4429
	631.38	119.168	630.275	116.259	629.766	112.64	630.421	106.839	630.155	107.665	630.12	95.619	631.841	92.0372	630.274	90.621	631.339	74.9612
	632.38	119.043	631.275	114.5	630.766	113.327	631.421	106.948	631.155	106.045	631.12	95.5617	632.841	92.3869	631.274	91.2026	632.339	75.2053
	633.38	119.874	632.275	114.68	631.766	113.274	632.421	105.75	632.155	106.052	632.12	95.8314	633.841	92.5669	632.274	89.901	633.339	73.8244
	634.38	119.914	633.275	114.603	632.766	112.176	633.421	108.204	633.155	106.507	633.12	95.2443	634.841	92.5317	633.274	89.6315	634.339	74.7095
	635.38	119.014	634.275	114.186	633.766	112.704	634.421	107.024	634.155	107.437	634.12	95.7511	635.841	92.9106	634.274	90.1308	635.339	75.3044
	636.38	119.753	635.275	114.948	634.766	112.531	635.421	107.444	635.155	106.817	635.12	95.9965	636.841	92.1115	635.274	90.5118	636.339	74.3483
	637.38	120.857	636.275	114.274	635.766	112.441	636.421	107.25	636.155	105.683	636.12	95.4783	637.841	91.8753	636.274	90.1168	637.339	75.2218
	638.38	119.699	637.275	114.056	636.766	113.238	637.421	107.248	637.155	107.702	637.12	96.4756	638.841	92.1008	637.274	90.1775	638.339	75.6869
	639.38	119.647	638.275	114.452	637.766	112.276	638.421	106.28	638.155	107.383	638.12	94.5537	639.841	92.7286	638.274	90.7503	639.339	75.2128
	640.38	120.097	639.275	114.678	638.766	112.378	639.421	106.543	639.155	107.214	639.12	95.5227	640.841	92.4977	639.274	90.5272	640.339	73.5079
	641.38	118.791	640.275	114.113	639.766	112.794	640.421	107.018	640.155	107.681	640.12	95.3126	641.841	93.3021	640.274	90.4347	641.339	74.7435
	642.38	118.32	641.275	114.116	640.766	113.511	641.421	107.468	641.155	106.576	641.12	96.21	642.841	93.2407	641.274	91.3791	642.339	74.1997
	643.38	119.72	642.275	115.109	641.766	112.884	642.421	107.831	642.155	106.542	642.12	95.7294	643.841	91.9168	642.274	90.738	643.339	74.6242
	644.38	120.616	643.275	114.301	642.766	113.658	643.421	108.055	643.155	108.461	643.12	95.7663	644.841	93.0718	643.274	90.6444	644.339	74.6145
	645.38	120.602	644.275	114.635	643.766	112.345	644.421	106.827	644.155	107.742	644.12	95.4801	645.841	92.8217	644.274	89.8887	645.339	74.2937
	646.38	120.071	645.275	115.53	644.766	113.901	645.421	106.932	645.155	107.74	645.12	96.3592	646.841	92.3577	645.274	90.343	646.339	74.6928
	647.38	120.229	646.275	115.02	645.766	113.222	646.421	106.463	646.155	107.599	646.12	96.1628	647.841	92.5887	646.274	90.7959	647.339	74.954
	648.38	120.339	647.275	115.626	646.766	113.066	647.421	107.133	647.155	107.916	647.12	96.1551	648.841	93.6575	647.274	90.7214	648.339	74.6341
	649.38	120.523	648.275	114.312	647.766	113.11	648.421	106.536	648.155	107.394	648.12	96.3118	649.841	91.845	648.274	90.2643	649.339	75.4332
	650.38	120.956	649.275	115.331	648.766	111.867	649.421	107.029	649.155	106.08	649.12	95.5427	650.841	92.339	649.274	90.8394	650.339	74.9672
	651.38	120.738	650.275	114.738	649.766	112.686	650.421	108.081	650.155	107.351	650.12	95.1315	651.841	93.012	650.274	91.4435	651.339	75.0364
	652.38	120.173	651.275	114.859	650.766	114.365	651.421	107.546	651.155	107.44	651.12	96.3186	652.841	91.8995	651.274	90.3465	652.339	75.4858
	653.38	120.876	652.275	114.036	651.766	112.792	652.421	107.897	652.155	107.858	652.12	94.8392	653.841	92.2824	652.274	90.4319	653.339	74.5186
	654.38	121.094	653.275	115.869	652.766	113.609	653.421	106.968	653.155	107.517	653.12	95.3254	654.841	91.8811	653.274	90.5485	654.339	74.3438
	655.38	121.841	654.275	116.256	653.766	112.992	654.421	108.168	654.155	106.725	654.12	96.0946	655.841	92.9032	654.274	90.2411	655.339	75.1795
	656.38	120.286	655.275	116.149	654.766	113.886	655.421	107.546	655.155	107.062	655.12	96.623	656.841	91.9067	655.274	90.3874	656.339	74.0171
	657.38	120.909	656.275	115.115	655.766	112.7	656.421	107.54	656.155	106.747	656.12	96.4865	657.841	91.7515	656.274	90.3111	657.339	75.5787
	658.38	120.762	657.275	115.633	656.766	113.087	657.421	107.084	657.155	106.697	657.12	96.1107	658.841	92.0951	657.274	89.737	658.339	75.5162
	659.38	120.001	658.275	115.005	657.766	112.339	658.421	107.311	658.155	107.432	658.12	97.4386	659.841	92.6601	658.274	89.4674	659.339	74.4531
	660.38	121.744	659.275	115.822	658.766	114.31	659.421	107.706	659.155	107.116	659.12	95.7949	660.841	92.6281	659.274	90.2344	660.339	74.3161
	661.38	120.837	660.275	116.493	659.766	113.832	660.421	108.138	660.155	106.967	660.12	96.6819	661.841	92.8731	660.274	91.4011	661.339	75.6345
	662.38	119.874	661.275	115.577	660.766	113.122	661.421	107.504	661.155	107.795	661.12	96.0929	662.841	92.4631	661.274	90.6585	662.339	74.7105
	663.38	120.153	662.275	114.877	661.766	113.008	662.421	107.369	662.155	107.108	662.12	96.2116	663.841	93.1518	662.274	90.4337	663.339	74.8227
	664.38	120.072	663.275	114.687	662.766	113.213	663.421	106.308	663.155	107.878	663.12	96.3386	664.841	92.379	663.274	91.1298	664.339	75.5439
	665.38	121.235	664.275	115.403	663.766	114.231	664.421	106.419	664.155	106.848	664.12	96.0562	665.841	92.767	664.274	91.0231	665.339	74.1871
	666.38	121.704	665.275	115.714	664.766	114.824	665.421	108.032	665.155	107.284	665.12	96.3615	666.841	91.8178	665.274	90.46	666.339	74.1586
	667.38	120.955	666.275	116.118	665.766	114.488	666.421	107.22	666.155	107.21	666.12	96.7785	667.841	92.3712	666.274	91.0168	667.339	75.1257
	668.38	120.854	667.275	115.005	666.766	113.87	667.421	107.525	667.155	107.508	667.12	96.7635	668.841	92.6743	667.274	91.6342	668.339	75.0062
	669.38	121.87	668.275	115.778	667.766	113.805	668.421	108.081	668.155	108.007	668.12	95.9538	669.841	92.461	668.274	90.7675	669.339	75.1907
	670.38	119.548	669.275	116.476	668.766	112.161	669.421	108.985	669.155	108.56	669.12	96.3861	670.841	93.201	669.274	89.4911	670.339	74.7186
	671.38	121.419	670.275	115.208	669.766	113.33	670.421	107.377	670.155	107.986	670.12	95.8494	671.841	92.2426	670.274	90.5261	671.339	75.2401
	672.38	120.823	671.275	116.297	670.766	113.964	671.421	108.854	671.155	107.475	671.12	95.7467	672.841	92.2685	671.274	90.4979	672.339	74.2808
	673.38	120.198	672.275	116.339	671.766	113.88	672.421	108.031	672.155	107.111	672.12	96.8755	673.841	92.0333	672.274	90.3954	673.339	74.5233
	674.38	121.535	673.275	116.584	672.766	113.636	673.421	107.995	673.155	107.976	673.12	95.8415	674.841	93.1413	673.274	91.323	674.339	74.461
	675.38	121.181	674.275	116.078	673.766	114.835	674.421	107.25	674.155	108.744	674.12	97.2533	675.841	91.6062	674.274	90.2084	675.339	75.7102
	676.38	121.856	675.275	116.803	674.766	113.175	675.421	108.041	675.155	107.454	675.12	95.8371	676.841	92.9391	675.274	91.7519	676.339	74.5849
	677.38	121.485	676.275	115.324	675.766	113.685	676.421	107.822	676.155	107.874	676.12	95.9045	677.841	92.9074	676.274	91.4631	677.339	74.6903
	678.38	121.45	677.275	115.611	676.766	114.859	677.421	108.237	677.155	107.304	677.12	96.1306	678.841	91.9979	677.274	90.39	678.339	75.3165
	679.38	121.386	678.275	117.102	677.766	113.056	678.421	108.84	678.155	107.735	678.12	96.6698	679.841	92.305	678.274	90.681	679.339	74.9313
	680.38	121.463	679.275	116.063	678.766	113.973	679.421	107.809	679.155	108.205	679.12	97.101	680.841	92.9041	679.274	90.8414	680.339	74.4542
	681.38	120.877	680.275	116.274	679.766	113.748	680.421	107.704	680.155	107.252	680.12	96.8786	681.841	93.3776	680.274	90.8622	681.339	74.3709
	682.38	120.587	681.275	115.337	680.766	113.912	681.421	107.313	681.155	108.006	681.12	96.1017	682.841	92.5409	681.274	91.1421	682.339	75.5501
	683.38	121.562	682.275	115.074	681.766	114.354	682.421	108.004	682.155	108.908	682.12	95.9443	683.841	93.5301	682.274	90.2591	683.339	75.0329
	684.38	120.241	683.275	116.412	682.766	114.586	683.421	108.643	683.155	108.426	683.12	95.8007	684.841	92.3575	683.274	90.6551	684.339	74.9059
	685.38	122.989	684.275	115.457	683.766	113.928	684.421	108.573	684.155	107.519	684.12	96.6842	685.841	92.8849	684.274	89.8722	685.339	74.1753
	686.38	121.519	685.275	116.192	684.766	114.221	685.421	107.307	685.155	108.176	685.12	96.4774	686.841	93.3111	685.274	90.1847	686.339	74.9723
	687.38	121.934	686.275	116.959	685.766	114.3	686.421	109.406	686.155	108.246	686.12	96.5295	687.841	93.0248	686.274	90.7486	687.339	74.047
	688.38	121.975	687.275	116.193	686.766	113.928	687.421	108.254	687.155	107.722	687.12	95.7799	688.841	92.7676	687.274	90.7185	688.339	74.4469
	689.38	121.076	688.275	115.244	687.766	113.848	688.421	108.531	688.155	109.086	688.12	95.278	689.841	91.8327	688.274	90.0198	689.339	75.6057
	690.38	121.021	689.275	115.829	688.766	115.153	689.421	107.966	689.155	107.913	689.12	96.3205	690.841	91.643	689.274	91.3758	690.339	75.2386
	691.38	122.468	690.275	115.72	689.766	114.051	690.421	108.457	690.155	108.313	690.12	96.1146	691.841	92.983	690.274	90.8061	691.339	75.2055
	692.38	121.43	691.275	115.942	690.766	113.779	691.421	108.303	691.155	107.706	691.12	95.6692	692.841	93.0164	691.274	90.3663	692.339	73.6658
	693.38	120.821	692.275	116.319	691.766	114.901	692.421	109.395	692.155	108.008	692.12	96.1709	693.841	92.2687	692.274	90.5305	693.339	74.8061
	694.38	120.707	693.275	117.123	692.766	114.18	693.421	107.697	693.155	108.26	693.12	97.2644	694.841	92.8087	693.274	90.7692	694.339	74.7898
	695.38	121.5	694.275	116.741	693.766	114.287	694.421	108.414	694.155	108.749	694.12	96.1607	695.841	92.2308	694.274	91.6537	695.339	74.4801
	696.38	121.103	695.275	116.001	694.766	115.052	695.421	108.313	695.155	108.318	695.12	95.9081	696.841	93.0938	695.274	90.4844	696.339	75.0536
	697.38	121.345	696.275	117.167	695.766	115.533	696.421	108.679	696.155	107.529	696.12	96.6988	697.841	92.1691	696.274	90.6317	697.339	73.8378
	698.38	122.029	697.275	117.051	696.766	114.631	697.421	108.952	697.155	108.164	697.12	96.5202	698.841	93.075	697.274	91.3747	698.339	75.1569
	699.38	122.126	698.275	117.653	697.766	113.865	698.421	108.867	698.155	108.566	698.12	95.8958	699.841	92.4855	698.274	91.4878	699.339	74.3347
	700.38	121.894	699.275	116.716	698.766	115.77	699.421	109.064	699.155	108.948	699.12	95.9616	700.841	92.8713	699.274	90.6887	700.339	73.8447
	701.38	121.729	700.275	117.014	699.766	113.082	700.421	108.807	700.155	108.976	700.12	96.6628	701.841	93.0232	700.274	91.6514	701.339	74.8181
	702.38	122.375	701.275	116.636	700.766	115.944	701.421	108.855	701.155	109.062	701.12	96.1828	702.841	92.2154	701.274	89.9744	702.339	75.309
	703.38	122.092	702.275	116.052	701.766	114.367	702.421	107.916	702.155	109.991	702.12	95.9204	703.841	92.4621	702.274	91.1494	703.339	75.0513
	704.38	121.143	703.275	116.392	702.766	115.361	703.421	109.033	703.155	109.133	703.12	97.0862	704.841	93.275	703.274	90.5958	704.339	74.3361
	705.38	122.044	704.275	116.511	703.766	114.669	704.421	108.815	704.155	109.63	704.12	97.4417	705.841	92.3501	704.274	89.972	705.339	75.3905
	706.38	122.191	705.275	117.233	704.766	114.798	705.421	108.231	705.155	108.634	705.12	96.215	706.841	91.5887	705.274	91.153	706.339	73.7246
	707.38	121.38	706.275	116.446	705.766	114.694	706.421	107.957	706.155	109.165	706.12	96.8597	707.841	93.3013	706.274	90.8866	707.339	74.5122
	708.38	122.604	707.275	117.049	706.766	115.373	707.421	108.489	707.155	109.688	707.12	96.4774	708.841	93.5221	707.274	90.5747	708.339	75.0408
	709.38	122.393	708.275	118.054	707.766	114.192	708.421	108.52	708.155	109.049	708.12	96.9002	709.841	92.3405	708.274	90.477	709.339	74.9036
	710.38	122.591	709.275	117.659	708.766	114.04	709.421	108.125	709.155	109.657	709.12	95.716	710.841	92.7479	709.274	89.8423	710.339	75.5107
	711.38	122.133	710.275	116.82	709.766	113	710.421	108.519	710.155	108.715	710.12	96.9963	711.841	93.1594	710.274	90.3368	711.339	75.3024
	712.38	121.758	711.275	117.245	710.766	114.523	711.421	108.434	711.155	108.876	711.12	97.3108	712.841	91.9605	711.274	90.4963	712.339	75.0982
	713.38	124.106	712.275	117.373	711.766	114.313	712.421	107.987	712.155	108.519	712.12	96.2901	713.841	92.7521	712.274	90.8977	713.339	74.2293
	714.38	122.328	713.275	117.387	712.766	115.259	713.421	109.101	713.155	109.039	713.12	95.9744	714.841	92.678	713.274	91.3121	714.339	75.381
	715.38	123.121	714.275	118.284	713.766	114.381	714.421	108.622	714.155	108.867	714.12	96.4214	715.841	92.9203	714.274	91.1025	715.339	74.2682
	716.38	123.74	715.275	117.717	714.766	116.163	715.421	109.373	715.155	108.785	715.12	97.0257	716.841	92.6302	715.274	90.0238	716.339	73.7084
	717.38	123.1	716.275	115.532	715.766	115.059	716.421	108.701	716.155	108.72	716.12	96.5129	717.841	92.7093	716.274	90.4669	717.339	74.3613
	718.38	121.761	717.275	117.442	716.766	114.829	717.421	108.899	717.155	109.388	717.12	96.9545	718.841	91.8871	717.274	91.3002	718.339	74.7436
	719.38	124.072	718.275	117.449	717.766	116.776	718.421	108.441	718.155	108.409	718.12	96.5066	719.841	93.0389	718.274	90.1416	719.339	75.0648
	720.38	122.011	719.275	117.182	718.766	115.082	719.421	109.591	719.155	108.092	719.12	96.2484	720.841	92.6319	719.274	90.5617	720.339	75.2401
	721.38	123.102	720.275	117.531	719.766	115.055	720.421	109.551	720.155	109.197	720.12	96.3573	721.841	92.4618	720.274	90.8576	721.339	74.6205
	722.38	124.034	721.275	117.136	720.766	115.313	721.421	109.773	721.155	108.808	721.12	96.8172	722.841	93.0956	721.274	90.7867	722.339	73.7666
	723.38	122.119	722.275	117.021	721.766	114.764	722.421	108.871	722.155	108.865	722.12	96.1558	723.841	92.441	722.274	90.8416	723.339	74.1171
	724.38	123.182	723.275	117.713	722.766	115.389	723.421	109.096	723.155	108.955	723.12	97.1619	724.841	93.2616	723.274	90.7104	724.339	74.419
	725.38	121.224	724.275	118.428	723.766	115.89	724.421	109.036	724.155	108.69	724.12	95.9754	725.841	92.8911	724.274	90.9287	725.339	74.6557
	726.38	122.19	725.275	118.2	724.766	115.446	725.421	109.863	725.155	109.616	725.12	98.166	726.841	91.5238	725.274	91.3761	726.339	73.9601
	727.38	121.948	726.275	118.033	725.766	115.018	726.421	110.158	726.155	109.826	726.12	97.2511	727.841	92.8421	726.274	90.5216	727.339	75.0961
	728.38	123.179	727.275	118.432	726.766	115.49	727.421	109.097	727.155	110.064	727.12	97.0945	728.841	92.4322	727.274	90.314	728.339	74.5786
	729.38	121.964	728.275	117.906	727.766	115.612	728.421	109.353	728.155	109.081	728.12	96.4104	729.841	92.7056	728.274	91.4868	729.339	74.7975
	730.38	122.225	729.275	117.234	728.766	115.337	729.421	108.819	729.155	109.96	729.12	96.2437	730.841	93.2078	729.274	91.3676	730.339	75.4678
	731.38	124.186	730.275	116.876	729.766	115.197	730.421	109.216	730.155	108.692	730.12	95.7215	731.841	92.5739	730.274	91.4387	731.339	74.8212
	732.38	122.776	731.275	118.477	730.766	116.044	731.421	109.246	731.155	107.933	731.12	96.9811	732.841	92.5996	731.274	90.9683	732.339	74.8022
	733.38	123.255	732.275	118.187	731.766	116.178	732.421	109.048	732.155	109.13	732.12	97.2363	733.841	92.8807	732.274	91.1225	733.339	75.0977
	734.38	122.739	733.275	117.405	732.766	116.43	733.421	109.116	733.155	108.447	733.12	97.5454	734.841	93.4023	733.274	90.2104	734.339	74.5597
	735.38	123.071	734.275	117.894	733.766	116.17	734.421	108.295	734.155	108.919	734.12	95.8897	735.841	93.6018	734.274	90.1898	735.339	74.7415
	736.38	122.766	735.275	118.644	734.766	114.12	735.421	109.49	735.155	110.257	735.12	96.8603	736.841	93.2302	735.274	90.8606	736.339	75.1421
	737.38	123.837	736.275	118.117	735.766	115.851	736.421	109.905	736.155	110.502	736.12	97.1126	737.841	93.2985	736.274	92.1509	737.339	74.4294
	738.38	123.41	737.275	119.308	736.766	115.882	737.421	108.676	737.155	110.062	737.12	96.9491	738.841	92.6531	737.274	91.2028	738.339	74.2105
	739.38	122.08	738.275	118.123	737.766	115.045	738.421	109.37	738.155	110.004	738.12	97.9342	739.841	91.8436	738.274	90.4799	739.339	75.2597
	740.38	122.43	739.275	117.44	738.766	115.662	739.421	109.663	739.155	108.626	739.12	96.8113	740.841	92.9151	739.274	90.1241	740.339	74.8902
	741.38	123.005	740.275	118.794	739.766	116.509	740.421	108.935	740.155	108.731	740.12	96.4706	741.841	93.2586	740.274	91.9793	741.339	74.8821
	742.38	122.997	741.275	118.124	740.766	115.199	741.421	109.401	741.155	110.326	741.12	96.4972	742.841	94.0441	741.274	91.681	742.339	74.6538
	743.38	123.807	742.275	118.289	741.766	115.444	742.421	110.092	742.155	109.435	742.12	96.767	743.841	92.2834	742.274	90.3955	743.339	74.6593
	744.38	123.152	743.275	118.404	742.766	115.456	743.421	109.405	743.155	109.31	743.12	96.9673	744.841	92.9682	743.274	91.2496	744.339	74.0415
	745.38	123.633	744.275	118.081	743.766	116.064	744.421	108.858	744.155	108.964	744.12	97.1508	745.841	93.0154	744.274	91.0235	745.339	74.9589
	746.38	123.183	745.275	118.009	744.766	116.299	745.421	109.269	745.155	109.549	745.12	97.0059	746.841	91.9035	745.274	90.7489	746.339	74.8804
	747.38	123.71	746.275	118.287	745.766	115.422	746.421	109.265	746.155	110.074	746.12	96.4469	747.841	92.3053	746.274	91.4992	747.339	75.0831
	748.38	123.061	747.275	118.362	746.766	114.491	747.421	110.397	747.155	109.926	747.12	97.2147	748.841	93.6882	747.274	90.7183	748.339	74.54
	749.38	123.57	748.275	118.89	747.766	115.674	748.421	110.325	748.155	109.409	748.12	95.9075	749.841	94.2628	748.274	91.4906	749.339	74.9352
	750.38	123.902	749.275	118.983	748.766	115.967	749.421	109.603	749.155	109.494	749.12	97.3244	750.841	93.1251	749.274	90.4076	750.339	75.2354
	751.38	124.109	750.275	118.067	749.766	115.339	750.421	109.521	750.155	110.349	750.12	97.3747	751.841	93.6407	750.274	91.2498	751.339	74.8005
	752.38	123.972	751.275	117.971	750.766	115.997	751.421	109.213	751.155	108.962	751.12	95.9295	752.841	93.0597	751.274	91.1825	752.339	73.8774
	753.38	124.463	752.275	118.76	751.766	115.929	752.421	109.678	752.155	108.49	752.12	96.2171	753.841	92.9083	752.274	90.5422	753.339	75.0884
	754.38	123.348	753.275	117.913	752.766	116.489	753.421	109.754	753.155	110.337	753.12	96.1603	754.841	92.7758	753.274	90.4367	754.339	74.726
	755.38	124.019	754.275	118.922	753.766	115.753	754.421	110.582	754.155	108.829	754.12	97.0325	755.841	92.8154	754.274	91.6134	755.339	74.7924
	756.38	124.545	755.275	118.393	754.766	115.421	755.421	109.583	755.155	110.242	755.12	97.2504	756.841	92.1878	755.274	91.3322	756.339	74.72
	757.38	124.164	756.275	118.819	755.766	116.597	756.421	109.584	756.155	109.699	756.12	97.4611	757.841	93.2146	756.274	90.6578	757.339	74.9662
	758.38	122.798	757.275	118.696	756.766	115.877	757.421	110.126	757.155	109.355	757.12	97.0158	758.841	93.6407	757.274	90.986	758.339	74.5271
	759.38	123.627	758.275	119.055	757.766	116.61	758.421	110.236	758.155	109.564	758.12	97.5346	759.841	92.8528	758.274	91.5933	759.339	73.848
	760.38	124.279	759.275	118.044	758.766	115.793	759.421	110.308	759.155	110.557	759.12	96.8152	760.841	93.2982	759.274	91.7907	760.339	74.6595
	761.38	123.071	760.275	117.809	759.766	116.281	760.421	110.016	760.155	109.496	760.12	97.7794	761.841	92.6119	760.274	90.6465	761.339	73.8731
	762.38	124.258	761.275	117.506	760.766	116.412	761.421	110.235	761.155	109.279	761.12	97.3668	762.841	93.6299	761.274	91.2771	762.339	74.5597
	763.38	123.994	762.275	118.808	761.766	116.134	762.421	109.094	762.155	110.084	762.12	98.0794	763.841	93.3354	762.274	90.7594	763.339	74.25
	764.38	123.93	763.275	118.905	762.766	116.442	763.421	109.336	763.155	110.232	763.12	97.3916	764.841	93.5811	763.274	91.0542	764.339	74.555
	765.38	123.623	764.275	118.641	763.766	117.03	764.421	109.944	764.155	108.696	764.12	97.0562	765.841	92.9753	764.274	91.9332	765.339	75.0677
	766.38	123.85	765.275	119.327	764.766	115.792	765.421	110.877	765.155	109.293	765.12	96.7238	766.841	94.1234	765.274	91.372	766.339	74.1383
	767.38	123.223	766.275	118.934	765.766	116.434	766.421	109.75	766.155	110.432	766.12	96.6064	767.841	93.7968	766.274	91.4971	767.339	75.095
	768.38	123.545	767.275	117.987	766.766	116.818	767.421	110.738	767.155	109.587	767.12	97.3323	768.841	93.1612	767.274	91.3368	768.339	74.1343
	769.38	123.798	768.275	118.981	767.766	116.768	768.421	109.89	768.155	109.144	768.12	97.625	769.841	92.594	768.274	90.6048	769.339	73.8619
	770.38	124.731	769.275	119.521	768.766	116.417	769.421	110.329	769.155	110.598	769.12	97.7154	770.841	93.8477	769.274	90.4181	770.339	74.5163
	771.38	123.833	770.275	119.018	769.766	116.076	770.421	110.072	770.155	109.422	770.12	97.4341	771.841	93.9107	770.274	92.2227	771.339	74.1196
	772.38	124.081	771.275	118.6	770.766	116.379	771.421	110.841	771.155	110.307	771.12	97.2064	772.841	92.982	771.274	91.6868	772.339	74.4468
	773.38	124.498	772.275	119.075	771.766	116.673	772.421	110.254	772.155	109.493	772.12	97.7076	773.841	93.0714	772.274	90.889	773.339	74.1118
	774.38	124.72	773.275	118.006	772.766	115.668	773.421	110.315	773.155	109.947	773.12	97.1731	774.841	93.3923	773.274	90.5745	774.339	74.9959
	775.38	123.352	774.275	118.351	773.766	115.256	774.421	110.554	774.155	109.775	774.12	97.055	775.841	93.6665	774.274	91.6012	775.339	74.2054
	776.38	125.294	775.275	118.919	774.766	116.695	775.421	110.528	775.155	109.641	775.12	97.5414	776.841	91.7295	775.274	91.8676	776.339	73.8135
	777.38	125.042	776.275	119.207	775.766	116.836	776.421	110.848	776.155	109.451	776.12	96.9844	777.841	92.4598	776.274	90.5303	777.339	74.5395
	778.38	124.233	777.275	119.003	776.766	116.868	777.421	109.973	777.155	109.651	777.12	97.2906	778.841	93.0237	777.274	91.5339	778.339	74.2075
	779.38	125.139	778.275	120.077	777.766	116.4	778.421	110.84	778.155	110.344	778.12	97.5665	779.841	92.9951	778.274	91.1047	779.339	75.0265
	780.38	124.92	779.275	119.011	778.766	117.292	779.421	109.963	779.155	110.059	779.12	96.2037	780.841	93.1781	779.274	91.1845	780.339	74.7411
	781.38	124.921	780.275	118.68	779.766	116.575	780.421	110.061	780.155	108.776	780.12	97.2845	781.841	93.6492	780.274	90.9347	781.339	75.3711
	782.38	124.456	781.275	119.84	780.766	117.466	781.421	110.328	781.155	109.449	781.12	97.1918	782.841	93.538	781.274	91.9852	782.339	74.5899
	783.38	123.743	782.275	118.615	781.766	116.927	782.421	111.542	782.155	109.999	782.12	97.1897	783.841	92.717	782.274	90.4979	783.339	74.5834
	784.38	124.26	783.275	119.294	782.766	115.92	783.421	110.081	783.155	109.565	783.12	97.637	784.841	91.8904	783.274	90.3061	784.339	74.4631
	785.38	124.116	784.275	118.308	783.766	116.955	784.421	110.889	784.155	110.11	784.12	96.1122	785.841	93.4232	784.274	89.9996	785.339	74.8476
	786.38	124.548	785.275	119.535	784.766	117.178	785.421	109.867	785.155	110.337	785.12	97.1247	786.841	92.5596	785.274	91.017	786.339	75.0965
	787.38	125.055	786.275	119.76	785.766	116.829	786.421	109.972	786.155	110.445	786.12	96.914	787.841	93.6931	786.274	91.3945	787.339	74.7956
	788.38	123.98	787.275	120.468	786.766	118.089	787.421	110.935	787.155	109.593	787.12	96.8482	788.841	93.4866	787.274	90.9457	788.339	73.7273
	789.38	125.113	788.275	118.53	787.766	116.578	788.421	111.286	788.155	109.551	788.12	96.7464	789.841	92.3498	788.274	91.8659	789.339	74.6213
	790.38	124.532	789.275	120.349	788.766	116.806	789.421	110.498	789.155	108.975	789.12	97.0963	790.841	93.3093	789.274	90.943	790.339	74.3141
	791.38	123.785	790.275	119.53	789.766	117.291	790.421	110.409	790.155	108.742	790.12	96.8942	791.841	92.6712	790.274	91.5993	791.339	74.2607
	792.38	123.428	791.275	119.814	790.766	116.465	791.421	111.752	791.155	109.667	791.12	97.2623	792.841	92.8308	791.274	90.5577	792.339	75.6699
	793.38	125.232	792.275	119.681	791.766	117.051	792.421	109.969	792.155	109.969	792.12	97.069	793.841	94.4197	792.274	91.0268	793.339	75.0032
	794.38	124.956	793.275	118.441	792.766	117.084	793.421	111.374	793.155	109.896	793.12	98.0651	794.841	94.0666	793.274	91.3335	794.339	74.5408
	795.38	124.689	794.275	119.527	793.766	116.91	794.421	110.698	794.155	109.476	794.12	98.2396	795.841	93.4188	794.274	91.1151	795.339	74.1499
	796.38	125.257	795.275	119.198	794.766	116.364	795.421	110.294	795.155	109.563	795.12	96.7806	796.841	92.9997	795.274	90.6656	796.339	74.1742
	797.38	125.731	796.275	119.563	795.766	116.643	796.421	111.396	796.155	109.895	796.12	97.9502	797.841	92.9721	796.274	91.1103	797.339	74.5364
	798.38	125.499	797.275	119.74	796.766	116.648	797.421	110.382	797.155	110.299	797.12	97.2647	798.841	93.1497	797.274	90.9035	798.339	74.4009
	799.38	125.678	798.275	120.265	797.766	118.22	798.421	109.883	798.155	110.012	798.12	96.954	799.841	92.8558	798.274	90.5422	799.339	75.3266
	800.38	124.549	799.275	119.182	798.766	116.49	799.421	111.724	799.155	110.217	799.12	96.7594	800.841	92.4614	799.274	91.5169	800.339	73.8782
	801.38	125.326	800.275	119.798	799.766	117.761	800.421	111.331	800.155	109.987	800.12	96.2729	801.841	93.5874	800.274	91.8013	801.339	74.4288
	802.38	125.658	801.275	119.581	800.766	117.209	801.421	111.05	801.155	110.7	801.12	96.6537	802.841	92.0343	801.274	90.6676	802.339	74.3326
	803.38	125.029	802.275	120.633	801.766	118.469	802.421	111.375	802.155	109.822	802.12	97.132	803.841	93.0262	802.274	91.4189	803.339	74.2688
	804.38	125.551	803.275	119.739	802.766	116.479	803.421	111.089	803.155	109.342	803.12	96.9199	804.841	92.4735	803.274	90.6087	804.339	75.316
	805.38	126.381	804.275	119.555	803.766	118.488	804.421	111.017	804.155	109.221	804.12	97.2078	805.841	92.3201	804.274	91.0071	805.339	74.7225
	806.38	124.784	805.275	119.867	804.766	116.99	805.421	109.886	805.155	109.666	805.12	97.5107	806.841	92.5753	805.274	90.8616	806.339	74.5206
	807.38	125.954	806.275	119.748	805.766	117.448	806.421	111.55	806.155	109.261	806.12	98.0148	807.841	93.6885	806.274	92.3771	807.339	74.9482
	808.38	125.082	807.275	119.403	806.766	116.554	807.421	111.033	807.155	109.699	807.12	98.2795	808.841	93.0132	807.274	90.9984	808.339	74.6548
	809.38	124.941	808.275	119.422	807.766	117.021	808.421	110.868	808.155	110.159	808.12	98.3755	809.841	93.4751	808.274	92.0495	809.339	74.8916
	810.38	124.908	809.275	120.343	808.766	117.841	809.421	111.386	809.155	111.07	809.12	97.7383	810.841	93.9408	809.274	90.7505	810.339	74.1352
	811.38	124.922	810.275	120.128	809.766	117.354	810.421	111.019	810.155	109.65	810.12	98.0816	811.841	92.901	810.274	91.5538	811.339	73.6973
	812.38	125.271	811.275	120.34	810.766	118.185	811.421	112.786	811.155	109.811	811.12	97.8213	812.841	92.4783	811.274	90.9689	812.339	74.5072
	813.38	125.894	812.275	119.591	811.766	117.146	812.421	111.323	812.155	109.817	812.12	97.4963	813.841	92.7059	812.274	91.2589	813.339	74.4912
	814.38	125.201	813.275	118.93	812.766	117.252	813.421	111.569	813.155	110.091	813.12	97.487	814.841	93.1479	813.274	92.2108	814.339	75.0301
	815.38	126.112	814.275	120.21	813.766	119.124	814.421	111.145	814.155	109.905	814.12	97.4006	815.841	92.7443	814.274	90.5396	815.339	75.2205
	816.38	125.285	815.275	119.838	814.766	117.672	815.421	110.947	815.155	109.948	815.12	97.9176	816.841	93.5916	815.274	91.344	816.339	74.4293
	817.38	125.696	816.275	121.086	815.766	118.695	816.421	111.643	816.155	110.404	816.12	97.7931	817.841	92.8058	816.274	90.1452	817.339	74.8198
	818.38	126.194	817.275	120.417	816.766	118.03	817.421	111.478	817.155	110.4	817.12	96.8006	818.841	93.4159	817.274	90.8231	818.339	74.6974
	819.38	125.973	818.275	120.752	817.766	117.897	818.421	111.797	818.155	110.197	818.12	96.9668	819.841	94.117	818.274	90.1836	819.339	75.4224
	820.38	125.015	819.275	120.869	818.766	117.98	819.421	110.07	819.155	111.4	819.12	98.3352	820.841	93.0633	819.274	91.1826	820.339	75.1468
	821.38	125.564	820.275	120.884	819.766	117.663	820.421	112.085	820.155	110.287	820.12	97.4788	821.841	92.7139	820.274	90.4382	821.339	75.219
	822.38	126.152	821.275	121.16	820.766	118.766	821.421	112.285	821.155	110.177	821.12	97.0459	822.841	94.5357	821.274	91.2145	822.339	74.0778
	823.38	125.532	822.275	120.524	821.766	117.729	822.421	112.341	822.155	108.764	822.12	98.0116	823.841	93.855	822.274	91.0882	823.339	74.5235
	824.38	126.095	823.275	119.945	822.766	118.425	823.421	111.66	823.155	109.961	823.12	97.6335	824.841	92.6561	823.274	91.3015	824.339	75.0075
	825.38	126.017	824.275	120.788	823.766	118.136	824.421	111.811	824.155	109.779	824.12	98.4333	825.841	93.2482	824.274	92.0735	825.339	75.0691
	826.38	125.751	825.275	120.736	824.766	118.475	825.421	112.243	825.155	110.286	825.12	97.8651	826.841	93.4245	825.274	91.1095	826.339	74.5334
	827.38	125.818	826.275	120.147	825.766	119.248	826.421	112.676	826.155	109.847	826.12	97.6333	827.841	93.9856	826.274	90.4961	827.339	74.2743
	828.38	125.679	827.275	121.145	826.766	117.172	827.421	111.46	827.155	109.191	827.12	98.6449	828.841	94.0526	827.274	91.3716	828.339	74.2221
	829.38	127.399	828.275	119.383	827.766	117.34	828.421	111.218	828.155	110.477	828.12	96.9377	829.841	93.0628	828.274	92.2171	829.339	74.7423
	830.38	125.105	829.275	120.003	828.766	117.807	829.421	111.413	829.155	110.654	829.12	98.383	830.841	94.0512	829.274	91.1255	830.339	74.0482
	831.38	125.91	830.275	120.712	829.766	117.321	830.421	112.06	830.155	110.002	830.12	97.5293	831.841	92.7562	830.274	90.5858	831.339	74.5097
	832.38	125.609	831.275	120.445	830.766	118.131	831.421	111.564	831.155	109.837	831.12	98.1526	832.841	93.4172	831.274	92.3836	832.339	74.6692
	833.38	127.448	832.275	120.286	831.766	117.045	832.421	111.458	832.155	111.071	832.12	97.2491	833.841	93.8989	832.274	91.9713	833.339	74.7029
	834.38	125.401	833.275	120.613	832.766	117.919	833.421	111.412	833.155	110.716	833.12	97.4205	834.841	92.5408	833.274	91.4933	834.339	73.7592
	835.38	124.923	834.275	121.299	833.766	117.765	834.421	112.607	834.155	110.407	834.12	97.2632	835.841	93.2589	834.274	91.4587	835.339	73.7839
	836.38	126.781	835.275	121.246	834.766	118.047	835.421	111.904	835.155	111.22	835.12	97.7605	836.841	93.2946	835.274	90.7731	836.339	74.6673
	837.38	126.658	836.275	121.593	835.766	117.952	836.421	113.022	836.155	110.614	836.12	96.821	837.841	93.4877	836.274	90.9851	837.339	74.2789
	838.38	125.642	837.275	120.455	836.766	116.827	837.421	111.428	837.155	110.211	837.12	98.0485	838.841	92.8778	837.274	91.4895	838.339	74.3426
	839.38	126.753	838.275	119.674	837.766	117.96	838.421	112.043	838.155	109.886	838.12	96.9942	839.841	93.0444	838.274	91.1808	839.339	75.2974
	840.38	127.064	839.275	121.11	838.766	117.756	839.421	112.369	839.155	111.204	839.12	97.7449	840.841	93.2708	839.274	91.6063	840.339	75.6651
	841.38	126.742	840.275	120.538	839.766	118.185	840.421	112.225	840.155	111.443	840.12	96.7221	841.841	93.1697	840.274	91.4933	841.339	74.7702
	842.38	125.467	841.275	121.497	840.766	118.639	841.421	111.109	841.155	110.216	841.12	96.9441	842.841	93.0813	841.274	90.4538	842.339	74.1452
	843.38	126.715	842.275	121.446	841.766	118.013	842.421	112.244	842.155	110.654	842.12	97.7644	843.841	93.2665	842.274	90.8448	843.339	74.6228
	844.38	126.126	843.275	121.257	842.766	119.338	843.421	111.236	843.155	110.13	843.12	97.6048	844.841	93.3722	843.274	91.4429	844.339	74.5655
	845.38	127.917	844.275	120.601	843.766	117.755	844.421	112.217	844.155	111.18	844.12	97.75	845.841	93.784	844.274	92.089	845.339	74.641
	846.38	125.845	845.275	121.46	844.766	118.455	845.421	112.468	845.155	111.567	845.12	96.6657	846.841	93.9291	845.274	91.3089	846.339	74.9861
	847.38	126.406	846.275	121.193	845.766	118.862	846.421	111.769	846.155	110.381	846.12	97.0809	847.841	93.0632	846.274	91.7201	847.339	75.1419
	848.38	126.017	847.275	120.896	846.766	118.027	847.421	112.445	847.155	110.867	847.12	97.996	848.841	93.668	847.274	90.6941	848.339	74.052
	849.38	126.854	848.275	120.292	847.766	117.884	848.421	112.312	848.155	111.311	848.12	97.3879	849.841	93.4316	848.274	91.3163	849.339	74.9815
	850.38	126.681	849.275	121.684	848.766	118.324	849.421	112.123	849.155	112.039	849.12	98.3149	850.841	93.0769	849.274	90.7853	850.339	75.3972
	851.38	125.877	850.275	120.78	849.766	118.18	850.421	112.457	850.155	110.834	850.12	98.1372	851.841	93.6797	850.274	91.5728	851.339	75.3839
	852.38	126.287	851.275	121.782	850.766	118.86	851.421	111.691	851.155	110.878	851.12	97.5575	852.841	92.3334	851.274	90.0919	852.339	74.5823
	853.38	127.446	852.275	121.649	851.766	118.287	852.421	112.965	852.155	110.181	852.12	97.6075	853.841	92.6555	852.274	91.2811	853.339	74.3634
	854.38	125.631	853.275	121.104	852.766	118.418	853.421	113.179	853.155	110.428	853.12	97.0455	854.841	93.3544	853.274	90.6527	854.339	74.9594
	855.38	125.819	854.275	121.456	853.766	118.653	854.421	112.207	854.155	110.82	854.12	97.1242	855.841	92.3288	854.274	90.9065	855.339	75.5391
	856.38	126.782	855.275	120.826	854.766	118.659	855.421	113.039	855.155	111.246	855.12	97.6818	856.841	93.1278	855.274	91.4119	856.339	74.7912
	857.38	127.642	856.275	121.693	855.766	118.99	856.421	112.911	856.155	110.655	856.12	97.6406	857.841	93.4221	856.274	91.2743	857.339	75.0379
	858.38	127.014	857.275	121.175	856.766	118.984	857.421	112.225	857.155	109.75	857.12	97.1703	858.841	94.2336	857.274	92.2076	858.339	74.8661
	859.38	126.769	858.275	120.78	857.766	117.985	858.421	112.046	858.155	110.268	858.12	97.9763	859.841	93.2172	858.274	91.2905	859.339	75.1661
	860.38	126.195	859.275	120.922	858.766	117.938	859.421	113.16	859.155	110.888	859.12	98.0266	860.841	93.4748	859.274	90.8435	860.339	74.7369
	861.38	126.402	860.275	121.415	859.766	119.669	860.421	112.329	860.155	110.538	860.12	97.9162	861.841	92.5031	860.274	91.7495	861.339	74.5044
	862.38	125.782	861.275	120.742	860.766	118.263	861.421	112.049	861.155	110.823	861.12	98.0162	862.841	93.0999	861.274	91.0353	862.339	74.7361
	863.38	127.209	862.275	120.979	861.766	118.915	862.421	112.289	862.155	111.813	862.12	98.7237	863.841	93.364	862.274	92.6508	863.339	75.3999
	864.38	126.819	863.275	122.003	862.766	118.05	863.421	112.32	863.155	111.584	863.12	96.6414	864.841	92.8905	863.274	90.1387	864.339	73.572
	865.38	126.53	864.275	121.536	863.766	119.198	864.421	113.343	864.155	110.267	864.12	98.3187	865.841	93.6772	864.274	91.4928	865.339	74.8276
	866.38	127.346	865.275	122.248	864.766	119.484	865.421	112.754	865.155	110.612	865.12	97.875	866.841	92.5253	865.274	91.8078	866.339	74.4993
	867.38	126.712	866.275	122.532	865.766	117.841	866.421	113.085	866.155	111.899	866.12	97.8589	867.841	93.801	866.274	90.9933	867.339	74.0562
	868.38	126.384	867.275	120.389	866.766	118.733	867.421	112.253	867.155	109.434	867.12	98.5197	868.841	93.1617	867.274	91.5983	868.339	74.2785
	869.38	127.418	868.275	122.276	867.766	119.459	868.421	112.939	868.155	111.378	868.12	97.2834	869.841	93.1397	868.274	91.4533	869.339	75.1273
	870.38	127.139	869.275	121.559	868.766	118.657	869.421	113.032	869.155	110.611	869.12	97.1036	870.841	93.7406	869.274	91.7191	870.339	75.3011
	871.38	127.382	870.275	122.172	869.766	119.275	870.421	112.624	870.155	110.583	870.12	98.1543	871.841	93.2594	870.274	92.0493	871.339	75.9353
	872.38	126.956	871.275	120.864	870.766	119.522	871.421	112.478	871.155	111.221	871.12	99.2235	872.841	93.2044	871.274	91.6702	872.339	74.6887
	873.38	127.307	872.275	122.145	871.766	118.477	872.421	112.619	872.155	110.918	872.12	97.9057	873.841	93.3241	872.274	91.7682	873.339	74.6048
	874.38	127.42	873.275	121.791	872.766	119.594	873.421	112.112	873.155	111.129	873.12	97.6438	874.841	92.8823	873.274	90.5577	874.339	74.1116
	875.38	127.938	874.275	122.281	873.766	119.355	874.421	112.609	874.155	109.961	874.12	97.9882	875.841	93.6047	874.274	91.3355	875.339	74.6015
	876.38	126.572	875.275	122.023	874.766	119.505	875.421	112.382	875.155	110.941	875.12	97.7349	876.841	93.5669	875.274	90.9538	876.339	75.2601
	877.38	127.072	876.275	121.671	875.766	119.108	876.421	112.353	876.155	111.036	876.12	97.3973	877.841	93.6174	876.274	92.2559	877.339	75.3381
	878.38	128.109	877.275	122.404	876.766	118.129	877.421	112.492	877.155	111	877.12	97.49	878.841	92.6049	877.274	91.8589	878.339	74.9362
	879.38	126.68	878.275	122.253	877.766	119.245	878.421	112.572	878.155	110.774	878.12	98.4342	879.841	93.3369	878.274	91.8537	879.339	75.0281
	880.38	126.981	879.275	121.41	878.766	118.61	879.421	113.055	879.155	111.322	879.12	98.2873	880.841	93.4559	879.274	91.7982	880.339	74.8793
	881.38	127.222	880.275	123.092	879.766	118.518	880.421	113.213	880.155	111.006	880.12	98.0496	881.841	93.7143	880.274	91.5455	881.339	75.1186
	882.38	127.384	881.275	121.676	880.766	119.003	881.421	112.561	881.155	111.927	881.12	97.2184	882.841	92.4759	881.274	91.9533	882.339	74.9334
	883.38	127.326	882.275	121.997	881.766	119.226	882.421	112.724	882.155	110.485	882.12	98.0511	883.841	93.0898	882.274	91.416	883.339	75.1939
	884.38	126.428	883.275	122.764	882.766	119.465	883.421	112.431	883.155	110.652	883.12	97.8921	884.841	92.9237	883.274	91.6963	884.339	74.265
	885.38	127.134	884.275	122.161	883.766	118.73	884.421	112.515	884.155	110.179	884.12	98.6833	885.841	93.0363	884.274	90.6355	885.339	75.0322
	886.38	127.685	885.275	122.032	884.766	119.948	885.421	112.854	885.155	111.38	885.12	97.0867	886.841	93.7403	885.274	90.3916	886.339	74.5587
	887.38	125.611	886.275	121.192	885.766	119.392	886.421	112.4	886.155	110.228	886.12	98.4208	887.841	93.4055	886.274	91.619	887.339	74.9535
	888.38	127.698	887.275	121.753	886.766	118.054	887.421	113.323	887.155	110.455	887.12	96.7908	888.841	92.9658	887.274	91.5187	888.339	74.6181
	889.38	128.576	888.275	122.829	887.766	119.427	888.421	113.251	888.155	111.385	888.12	98.0458	889.841	92.5398	888.274	91.5296	889.339	75.1042
	890.38	128.524	889.275	122.233	888.766	119.027	889.421	113.762	889.155	111.328	889.12	98.9024	890.841	92.986	889.274	90.8789	890.339	74.3407
	891.38	127.552	890.275	121.749	889.766	119.915	890.421	112.726	890.155	110.563	890.12	98.1938	891.841	93.5637	890.274	91.4787	891.339	75.1126
	892.38	128.509	891.275	122.22	890.766	119.297	891.421	112.546	891.155	111.35	891.12	98.0819	892.841	94.1639	891.274	91.0826	892.339	74.8903
	893.38	127.621	892.275	122.651	891.766	118.488	892.421	112.457	892.155	110.469	892.12	97.9958	893.841	93.503	892.274	91.6089	893.339	73.994
	894.38	127.471	893.275	122.981	892.766	119.112	893.421	113.027	893.155	110.362	893.12	98.5185	894.841	94.2215	893.274	91.9589	894.339	74.1783
	895.38	126.723	894.275	122.645	893.766	119.005	894.421	112.241	894.155	111.827	894.12	97.4956	895.841	92.7146	894.274	91.5969	895.339	75.0349
	896.38	127.616	895.275	122.906	894.766	119.482	895.421	112.363	895.155	112.188	895.12	98.6055	896.841	93.2592	895.274	91.6614	896.339	73.9184
	897.38	127.087	896.275	121.421	895.766	119.427	896.421	114.068	896.155	111.654	896.12	97.7672	897.841	93.9578	896.274	91.647	897.339	74.5215
	898.38	127.538	897.275	123.119	896.766	119.23	897.421	113.535	897.155	111.282	897.12	98.3421	898.841	92.7672	897.274	91.3186	898.339	74.5667
	899.38	127.674	898.275	121.744	897.766	120.591	898.421	112.2	898.155	111.757	898.12	98.0881	899.841	94.1253	898.274	91.3745	899.339	74.6873
	900.38	127.936	899.275	123.405	898.766	119.977	899.421	113.476	899.155	112.163	899.12	97.7953	900.841	93.0388	899.274	92.1078	900.339	75.1045
	901.38	128.951	900.275	123.747	899.766	119.62	900.421	113.158	900.155	112.063	900.12	97.5871	901.841	93.3045	900.274	90.8195	901.339	75.0774
	902.38	128.203	901.275	122.158	900.766	119.713	901.421	113.323	901.155	112.255	901.12	97.8251	902.841	92.9558	901.274	91.2544	902.339	74.1656
	903.38	127.522	902.275	123.183	901.766	119.934	902.421	113.116	902.155	111.286	902.12	97.6843	903.841	93.7966	902.274	92.3459	903.339	75.4463
	904.38	128.968	903.275	123.172	902.766	118.937	903.421	112.943	903.155	111.056	903.12	97.9825	904.841	93.6374	903.274	91.1583	904.339	75.4361
	905.38	128.1	904.275	121.956	903.766	119.791	904.421	113.128	904.155	111.782	904.12	97.8583	905.841	92.6511	904.274	91.5081	905.339	75.5865
	906.38	128.873	905.275	122.006	904.766	119.349	905.421	113.466	905.155	111.463	905.12	97.4339	906.841	93.7017	905.274	91.6848	906.339	75.365
	907.38	127.633	906.275	122.896	905.766	119.968	906.421	113.812	906.155	110.762	906.12	97.7539	907.841	93.6495	906.274	91.9734	907.339	74.3553
	908.38	127.386	907.275	122.174	906.766	119.441	907.421	113.571	907.155	111.423	907.12	98.4684	908.841	94.0005	907.274	90.6351	908.339	74.8013
	909.38	128.262	908.275	122.545	907.766	119.628	908.421	112.843	908.155	112.566	908.12	98.2047	909.841	92.1702	908.274	93.0616	909.339	74.351
	910.38	129.854	909.275	121.759	908.766	119.901	909.421	113.586	909.155	110.587	909.12	98.4986	910.841	92.8475	909.274	92.5854	910.339	74.7624
	911.38	127.663	910.275	122.397	909.766	119.777	910.421	113.054	910.155	111.048	910.12	98.375	911.841	93.967	910.274	91.871	911.339	74.4308
	912.38	128.431	911.275	122.56	910.766	118.873	911.421	113.31	911.155	111.276	911.12	98.9628	912.841	93.4147	911.274	91.3787	912.339	74.7665
	913.38	128.019	912.275	123.239	911.766	119.208	912.421	113.759	912.155	110.971	912.12	98.5657	913.841	92.8033	912.274	91.374	913.339	74.682
	914.38	128.035	913.275	123.128	912.766	119.954	913.421	113.099	913.155	112.389	913.12	98.1822	914.841	92.9587	913.274	91.7763	914.339	75.6298
	915.38	128.281	914.275	122.549	913.766	120.447	914.421	112.918	914.155	111.927	914.12	97.6495	915.841	93.1308	914.274	92.0479	915.339	74.6155
	916.38	126.837	915.275	123.228	914.766	119.86	915.421	113	915.155	111.467	915.12	97.9947	916.841	93.4129	915.274	91.203	916.339	75.3618
	917.38	129.006	916.275	123.909	915.766	120.354	916.421	113.839	916.155	111.808	916.12	98.1056	917.841	93.9878	916.274	91.2911	917.339	74.972
	918.38	128.514	917.275	122.439	916.766	120.129	917.421	113.054	917.155	111.311	917.12	97.9344	918.841	92.7078	917.274	91.8456	918.339	74.7192
	919.38	128.731	918.275	122.495	917.766	119.687	918.421	113.606	918.155	112	918.12	97.1137	919.841	93.6536	918.274	91.9045	919.339	74.7585
	920.38	129.571	919.275	123.335	918.766	119.492	919.421	114.172	919.155	112.028	919.12	97.7717	920.841	94.1924	919.274	91.4675	920.339	74.8447
	921.38	128.116	920.275	122.984	919.766	120.016	920.421	113.794	920.155	112.348	920.12	98.6129	921.841	93.6154	920.274	91.2933	921.339	74.4884
	922.38	128.262	921.275	123.836	920.766	119.415	921.421	112.604	921.155	110.323	921.12	97.7597	922.841	93.9682	921.274	91.5342	922.339	74.1624
	923.38	127.514	922.275	123.043	921.766	120.387	922.421	113.503	922.155	112.298	922.12	98.3374	923.841	94.1668	922.274	91.3482	923.339	74.8602
	924.38	129.825	923.275	122.342	922.766	120.018	923.421	113.304	923.155	112.012	923.12	97.9948	924.841	94.1954	923.274	92.4976	924.339	74.6578
	925.38	128.259	924.275	121.652	923.766	119.247	924.421	113.851	924.155	111.504	924.12	99.7835	925.841	93.6445	924.274	91.7957	925.339	73.8429
	926.38	127.85	925.275	122.433	924.766	121.81	925.421	112.753	925.155	112.648	925.12	99.837	926.841	94.2381	925.274	91.1856	926.339	74.8262
	927.38	127.618	926.275	122.373	925.766	120.54	926.421	114.743	926.155	111.767	926.12	97.6004	927.841	93.5499	926.274	92.1145	927.339	74.6509
	928.38	127.816	927.275	122.574	926.766	119.682	927.421	112.786	927.155	111.543	927.12	97.8954	928.841	94.1525	927.274	92.1588	928.339	75.0931
	929.38	128.419	928.275	123.314	927.766	120.268	928.421	113.835	928.155	111.933	928.12	99.0729	929.841	93.3085	928.274	91.6794	929.339	73.9491
	930.38	128.302	929.275	123.064	928.766	121.121	929.421	113.992	929.155	111.695	929.12	97.9983	930.841	93.7237	929.274	91.5501	930.339	75.0688
	931.38	129.129	930.275	123.284	929.766	120.351	930.421	114.304	930.155	111.326	930.12	98.0038	931.841	93.2901	930.274	91.5366	931.339	74.397
	932.38	128.411	931.275	123.556	930.766	119.274	931.421	113.407	931.155	112.224	931.12	98.0116	932.841	94.1979	931.274	91.6562	932.339	74.105
	933.38	129.095	932.275	123.312	931.766	120.525	932.421	113.273	932.155	111.823	932.12	98.1289	933.841	93.2456	932.274	91.8917	933.339	74.683
	934.38	128.023	933.275	123.013	932.766	120.107	933.421	114.107	933.155	111.849	933.12	98.1806	934.841	94.0199	933.274	92.2498	934.339	75.4267
	935.38	128.726	934.275	124.101	933.766	121.069	934.421	113.469	934.155	112.01	934.12	98.3474	935.841	93.5808	934.274	91.9956	935.339	75.5191
	936.38	129.467	935.275	123.602	934.766	120.601	935.421	114.392	935.155	111.95	935.12	97.7315	936.841	93.9624	935.274	91.278	936.339	74.979
	937.38	129.072	936.275	123.65	935.766	120.26	936.421	112.736	936.155	112.442	936.12	98.3487	937.841	93.5574	936.274	91.3619	937.339	74.9469
	938.38	129.066	937.275	123.685	936.766	120.934	937.421	113.499	937.155	112.414	937.12	97.9327	938.841	94.6157	937.274	92.1898	938.339	74.9672
	939.38	128.32	938.275	123.8	937.766	120.98	938.421	113.56	938.155	110.955	938.12	99.2386	939.841	93.1837	938.274	92.2599	939.339	75.5688
	940.38	128.328	939.275	124.024	938.766	119.551	939.421	113.488	939.155	112.383	939.12	98.4019	940.841	93.6439	939.274	91.5739	940.339	74.3999
	941.38	128.563	940.275	124.435	939.766	120.554	940.421	114.346	940.155	112.313	940.12	97.8068	941.841	94.1865	940.274	90.7243	941.339	74.23
	942.38	128.152	941.275	124.881	940.766	120.656	941.421	114.626	941.155	111.805	941.12	97.957	942.841	94.0323	941.274	92.136	942.339	74.7944
	943.38	129.212	942.275	124.511	941.766	120.167	942.421	112.532	942.155	111.087	942.12	98.9337	943.841	92.6406	942.274	91.7824	943.339	74.8797
	944.38	129.135	943.275	122.795	942.766	120.058	943.421	114.172	943.155	111.667	943.12	98.9703	944.841	93.5456	943.274	91.3381	944.339	75.3726
	945.38	129.43	944.275	123.775	943.766	120.843	944.421	113.832	944.155	111.193	944.12	98.1032	945.841	93.6627	944.274	92.0244	945.339	74.492
	946.38	129.151	945.275	122.949	944.766	120.309	945.421	113.056	945.155	112.313	945.12	99.1178	946.841	94.3905	945.274	91.3238	946.339	74.7798
	947.38	130.964	946.275	123.548	945.766	120.559	946.421	113.993	946.155	112.976	946.12	98.62	947.841	94.0272	946.274	91.1904	947.339	75.5353
	948.38	129.412	947.275	123.974	946.766	120.405	947.421	114.046	947.155	111.984	947.12	98.5105	948.841	93.9469	947.274	92.0453	948.339	73.9514
	949.38	129.463	948.275	123.419	947.766	121.577	948.421	114.278	948.155	112.251	948.12	98.9461	949.841	93.8997	948.274	91.3507	949.339	75.0186
	950.38	129.208	949.275	123.718	948.766	119.948	949.421	114.138	949.155	112.327	949.12	99.583	950.841	94.2174	949.274	91.6809	950.339	74.9832
	951.38	128.401	950.275	123.179	949.766	119.264	950.421	114.009	950.155	112.756	950.12	98.9927	951.841	93.3304	950.274	91.1659	951.339	74.9835
	952.38	129.102	951.275	124.066	950.766	121.27	951.421	113.672	951.155	112.284	951.12	98.0402	952.841	93.3381	951.274	91.5691	952.339	74.4589
	953.38	130.977	952.275	124.3	951.766	120.465	952.421	113.537	952.155	112.438	952.12	97.7961	953.841	93.9284	952.274	90.9085	953.339	74.9812
	954.38	129.099	953.275	124.807	952.766	119.879	953.421	114.17	953.155	111.966	953.12	98.2751	954.841	93.6492	953.274	90.9841	954.339	75.9734
	955.38	129.221	954.275	124.193	953.766	121.294	954.421	114.794	954.155	112.622	954.12	98.5825	955.841	93.9897	954.274	92.056	955.339	75.5176
	956.38	130.356	955.275	123.721	954.766	120.416	955.421	113.554	955.155	113.078	955.12	98.235	956.841	93.6071	955.274	91.7766	956.339	75.4871
	957.38	129.535	956.275	122.724	955.766	121.122	956.421	113.718	956.155	113.127	956.12	99.2764	957.841	93.7293	956.274	92.7603	957.339	74.3572
	958.38	130.33	957.275	125.229	956.766	120.854	957.421	114.447	957.155	111.096	957.12	98.1564	958.841	94.1978	957.274	92.0024	958.339	73.8391
	959.38	129.701	958.275	124.767	957.766	120.975	958.421	114.693	958.155	113.453	958.12	98.5082	959.841	94.7999	958.274	91.727	959.339	75.0347
	960.38	129.147	959.275	123.018	958.766	121.03	959.421	113.382	959.155	111.461	959.12	98.0926	960.841	94.5435	959.274	92.1598	960.339	74.7517
	961.38	128.559	960.275	124.718	959.766	121.439	960.421	114.76	960.155	111.517	960.12	98.4233	961.841	93.1323	960.274	92.1449	961.339	74.9495
	962.38	129.884	961.275	123.335	960.766	121.7	961.421	114.678	961.155	111.734	961.12	98.2371	962.841	93.2557	961.274	90.6581	962.339	75.6154
	963.38	130.285	962.275	124.147	961.766	120.97	962.421	114.605	962.155	113.618	962.12	99.4324	963.841	94.2217	962.274	91.2921	963.339	75.5898
	964.38	129.995	963.275	123.412	962.766	120.772	963.421	113.947	963.155	112.198	963.12	99.4488	964.841	92.9769	963.274	91.695	964.339	74.9314
	965.38	130.77	964.275	124.817	963.766	121.393	964.421	114.342	964.155	112.514	964.12	98.8531	965.841	93.6787	964.274	91.3105	965.339	74.1703
	966.38	130.832	965.275	122.967	964.766	121.062	965.421	115.536	965.155	111.824	965.12	98.8199	966.841	94.9354	965.274	91.9328	966.339	73.5049
	967.38	129.397	966.275	125.106	965.766	120.461	966.421	113.83	966.155	112.743	966.12	99.6152	967.841	93.3955	966.274	92.1316	967.339	74.4287
	968.38	128.899	967.275	123.725	966.766	121.409	967.421	114.072	967.155	111.227	967.12	98.9089	968.841	93.2444	967.274	92.0986	968.339	74.3668
	969.38	128.785	968.275	124.857	967.766	121.349	968.421	114.605	968.155	112.349	968.12	98.115	969.841	93.8401	968.274	91.5334	969.339	74.5857
	970.38	130.194	969.275	124.486	968.766	121.784	969.421	115.77	969.155	112.947	969.12	98.4449	970.841	94.237	969.274	91.3465	970.339	74.3902
	971.38	129.915	970.275	124.745	969.766	121.876	970.421	114.49	970.155	112.549	970.12	97.8086	971.841	93.5223	970.274	92.2847	971.339	73.518
	972.38	130.103	971.275	124.081	970.766	120.693	971.421	114.176	971.155	111.641	971.12	98.6213	972.841	93.7979	971.274	91.1718	972.339	74.0312
	973.38	129.208	972.275	123.783	971.766	121.47	972.421	114.009	972.155	112.197	972.12	98.3016	973.841	92.991	972.274	92.4246	973.339	75.4049
	974.38	129.142	973.275	123.129	972.766	120.669	973.421	113.702	973.155	112.87	973.12	98.3159	974.841	94.4616	973.274	91.3015	974.339	74.9898
	975.38	129.603	974.275	123.996	973.766	121.127	974.421	115.025	974.155	112.006	974.12	99.0008	975.841	93.6998	974.274	92.6265	975.339	74.2999
	976.38	129.87	975.275	125.153	974.766	122.177	975.421	114.962	975.155	112.082	975.12	99.1583	976.841	94.3471	975.274	91.6367	976.339	74.701
	977.38	128.783	976.275	125.267	975.766	121.762	976.421	115.184	976.155	112.336	976.12	98.8501	977.841	94.0129	976.274	91.4934	977.339	74.9501
	978.38	130.047	977.275	123.986	976.766	121.235	977.421	114.689	977.155	113.05	977.12	98.0544	978.841	94.3541	977.274	91.6522	978.339	74.8761
	979.38	130.645	978.275	123.773	977.766	120.388	978.421	114.487	978.155	113.195	978.12	98.855	979.841	94.2964	978.274	91.3974	979.339	74.726
	980.38	129.254	979.275	124.975	978.766	121.058	979.421	114.433	979.155	111.909	979.12	99.3888	980.841	94.4985	979.274	92.6939	980.339	74.8634
	981.38	130.146	980.275	125.082	979.766	120.844	980.421	114.286	980.155	111.882	980.12	98.0838	981.841	94.1644	980.274	92.1935	981.339	74.2751
	982.38	131.282	981.275	125.046	980.766	120.399	981.421	114.319	981.155	113.173	981.12	98.8577	982.841	94.8941	981.274	91.9652	982.339	74.3502
	983.38	130.603	982.275	123.245	981.766	121.521	982.421	113.956	982.155	112.222	982.12	98.6204	983.841	93.4946	982.274	91.244	983.339	74.831
	984.38	129.258	983.275	123.777	982.766	122.019	983.421	113.654	983.155	111.787	983.12	98.5481	984.841	93.3251	983.274	91.9284	984.339	74.099
	985.38	129.87	984.275	125.414	983.766	121.123	984.421	115.267	984.155	112.375	984.12	98.8549	985.841	93.5207	984.274	91.6301	985.339	74.7837
	986.38	131.107	985.275	124.841	984.766	120.865	985.421	114.85	985.155	112.729	985.12	99.0251	986.841	94.1802	985.274	92.5062	986.339	74.5282
	987.38	130.699	986.275	124.755	985.766	121.06	986.421	114.769	986.155	112.856	986.12	99.102	987.841	94.7136	986.274	91.8076	987.339	75.5592
	988.38	131.138	987.275	125.251	986.766	122.969	987.421	115.072	987.155	112.189	987.12	98.6758	988.841	94.2502	987.274	92.9734	988.339	74.5485
	989.38	129.707	988.275	124.894	987.766	121.416	988.421	114.39	988.155	112.941	988.12	98.588	989.841	94.0625	988.274	91.6283	989.339	74.6816
	990.38	130.041	989.275	124.762	988.766	121.815	989.421	114.707	989.155	113.314	989.12	99.2697	990.841	93.5095	989.274	91.8545	990.339	75.084
	991.38	131.148	990.275	124.364	989.766	121.904	990.421	114.546	990.155	113.056	990.12	97.7999	991.841	94.206	990.274	91.3646	991.339	75.0703
	992.38	130.016	991.275	126.107	990.766	122.109	991.421	114.138	991.155	112.664	991.12	98.8065	992.841	94.148	991.274	92.444	992.339	73.865
	993.38	130.516	992.275	124.935	991.766	121.429	992.421	115.241	992.155	112.137	992.12	97.4418	993.841	94.3571	992.274	91.0968	993.339	74.8345
	994.38	130.108	993.275	124.738	992.766	121.879	993.421	114.465	993.155	113.219	993.12	99.0053	994.841	93.9876	993.274	91.348	994.339	73.8874
	995.38	130.643	994.275	124.651	993.766	121.359	994.421	115.482	994.155	112.819	994.12	99.3731	995.841	93.2281	994.274	91.4363	995.339	75.2337
	996.38	130.217	995.275	126.383	994.766	121.941	995.421	114.826	995.155	113.271	995.12	99.4722	996.841	93.8371	995.274	91.6357	996.339	74.8054
	997.38	130.663	996.275	125.034	995.766	121.195	996.421	115.471	996.155	113.188	996.12	98.9317	997.841	93.4815	996.274	91.931	997.339	74.4156
	998.38	130.531	997.275	124.544	996.766	122.224	997.421	116.375	997.155	112.17	997.12	98.4275	998.841	94.2749	997.274	91.7389	998.339	74.7185
	999.38	129.412	998.275	124.559	997.766	121.418	998.421	114.668	998.155	113.067	998.12	99.4445	999.841	94.2471	998.274	92.1256	999.339	74.6845
	1000.38	130.602	999.275	124.746	998.766	121.781	999.421	115.28	999.155	112.812	999.12	98.8136	1000.84	94.9915	999.274	92.0633	1000.34	74.6681
	1001.38	130.279	1000.28	124.034	999.766	121.328	1000.42	114.439	1000.16	112.852	1000.12	99.0728	1001.84	93.6646	1000.27	91.5778	1001.34	73.9083
	1002.38	130.733	1001.28	125.097	1000.77	122.477	1001.42	115.789	1001.16	112.484	1001.12	99.3019	1002.84	93.0306	1001.27	92.7604	1002.34	74.8082
	1003.38	130.588	1002.28	125.608	1001.77	121.493	1002.42	115.633	1002.16	113.064	1002.12	99.4021	1003.84	94.0973	1002.27	92.1593	1003.34	75.5572
	1004.38	129.494	1003.28	124.232	1002.77	122.13	1003.42	116.001	1003.16	114.156	1003.12	98.6081	1004.84	92.7393	1003.27	92.1911	1004.34	74.7177
	1005.38	130.138	1004.28	124.707	1003.77	122.406	1004.42	115.022	1004.16	112.103	1004.12	99.9996	1005.84	93.9012	1004.27	92.0545	1005.34	74.2045
	1006.38	132.182	1005.28	125.425	1004.77	121.666	1005.42	116.944	1005.16	113.001	1005.12	99.5397	1006.84	93.8577	1005.27	92.7563	1006.34	74.4672
	1007.38	131.187	1006.28	124.517	1005.77	122.224	1006.42	114.06	1006.16	112.805	1006.12	98.9807	1007.84	93.7441	1006.27	91.8828	1007.34	74.737
	1008.38	131.302	1007.28	124.705	1006.77	122.765	1007.42	115.382	1007.16	113.218	1007.12	99.0022	1008.84	93.3112	1007.27	91.6356	1008.34	74.4077
	1009.38	130.639	1008.28	124.791	1007.77	121.983	1008.42	114.594	1008.16	112.765	1008.12	98.9095	1009.84	94.4758	1008.27	91.9463	1009.34	74.4406
	1010.38	130.919	1009.28	125.665	1008.77	121.177	1009.42	115.672	1009.16	113.211	1009.12	98.3857	1010.84	94.0057	1009.27	91.9919	1010.34	74.6407
	1011.38	130.992	1010.28	124.79	1009.77	121.299	1010.42	114.788	1010.16	113.071	1010.12	99.1152	1011.84	94.2955	1010.27	91.5069	1011.34	75.0399
	1012.38	130.624	1011.28	124.972	1010.77	121.504	1011.42	114.93	1011.16	112.642	1011.12	99.6663	1012.84	94.3105	1011.27	91.6977	1012.34	73.855
	1013.38	129.83	1012.28	125.481	1011.77	121.719	1012.42	115.456	1012.16	112.822	1012.12	98.7372	1013.84	93.679	1012.27	91.2271	1013.34	74.1678
	1014.38	130.159	1013.28	124.933	1012.77	122.469	1013.42	115.055	1013.16	112.072	1013.12	99.1863	1014.84	94.2309	1013.27	92.1007	1014.34	74.8158
	1015.38	131.589	1014.28	125.214	1013.77	121.262	1014.42	115.41	1014.16	112.969	1014.12	98.1553	1015.84	94.0827	1014.27	92.0816	1015.34	74.2302
	1016.38	129.636	1015.28	125.325	1014.77	122.793	1015.42	115.532	1015.16	114.085	1015.12	99.0397	1016.84	94.1973	1015.27	92.1129	1016.34	75.3176
	1017.38	130.907	1016.28	126.9	1015.77	122.46	1016.42	115.847	1016.16	114.36	1016.12	100.01	1017.84	94.5018	1016.27	92.1411	1017.34	74.8836
	1018.38	130.211	1017.28	124.422	1016.77	122.112	1017.42	115.175	1017.16	114.106	1017.12	99.1088	1018.84	93.0675	1017.27	91.7553	1018.34	75.0909
	1019.38	130.498	1018.28	125.549	1017.77	122.537	1018.42	115.955	1018.16	113.289	1018.12	99.4556	1019.84	94.0843	1018.27	91.7915	1019.34	74.1687
	1020.38	131.252	1019.28	125.965	1018.77	122.821	1019.42	114.968	1019.16	113.054	1019.12	98.8848	1020.84	93.6605	1019.27	92.5197	1020.34	75.1786
	1021.38	130.535	1020.28	125.169	1019.77	122.796	1020.42	115.903	1020.16	112.869	1020.12	98.6522	1021.84	94.7437	1020.27	92.5265	1021.34	74.9793
	1022.38	130.497	1021.28	126.042	1020.77	121.724	1021.42	114.276	1021.16	113.032	1021.12	98.5984	1022.84	93.622	1021.27	91.8485	1022.34	73.9857
	1023.38	130.36	1022.28	126.166	1021.77	122.321	1022.42	115.95	1022.16	113.419	1022.12	98.7558	1023.84	94.3462	1022.27	91.7779	1023.34	74.6676
	1024.38	130.39	1023.28	125.101	1022.77	122.048	1023.42	115.286	1023.16	112.869	1023.12	99.615	1024.84	94.3596	1023.27	92.0225	1024.34	74.559
	1025.38	129.895	1024.28	125.884	1023.77	121.67	1024.42	115.442	1024.16	112.824	1024.12	99.7497	1025.84	94.2031	1024.27	91.29	1025.34	74.7535
	1026.38	131.021	1025.28	126.657	1024.77	123.428	1025.42	116.399	1025.16	113.164	1025.12	98.8411	1026.84	93.2314	1025.27	91.1165	1026.34	74.0221
	1027.38	129.884	1026.28	126.51	1025.77	122.081	1026.42	114.957	1026.16	113.332	1026.12	99.3683	1027.84	94.1773	1026.27	91.2384	1027.34	75.098
	1028.38	130.259	1027.28	124.591	1026.77	121.064	1027.42	116.15	1027.16	113.415	1027.12	98.5001	1028.84	94.5208	1027.27	91.9015	1028.34	74.3827
	1029.38	130.961	1028.28	125.376	1027.77	123.004	1028.42	115.107	1028.16	113.204	1028.12	100.08	1029.84	94.1943	1028.27	91.7648	1029.34	74.9819
	1030.38	130.76	1029.28	126.6	1028.77	121.935	1029.42	115.679	1029.16	113.174	1029.12	98.7554	1030.84	95.6393	1029.27	91.0689	1030.34	75.5068
	1031.38	129.949	1030.28	125.66	1029.77	122.404	1030.42	115.205	1030.16	112.752	1030.12	98.7068	1031.84	93.8563	1030.27	91.8039	1031.34	74.7674
	1032.38	129.988	1031.28	125.453	1030.77	121.654	1031.42	115.768	1031.16	113.632	1031.12	98.5398	1032.84	93.5588	1031.27	92.3	1032.34	75.1456
	1033.38	131.104	1032.28	125.387	1031.77	123.47	1032.42	116.878	1032.16	114.742	1032.12	99.0718	1033.84	93.7213	1032.27	92.4819	1033.34	74.3943
	1034.38	131.085	1033.28	126.465	1032.77	121.747	1033.42	116.755	1033.16	113.322	1033.12	98.3881	1034.84	93.5976	1033.27	91.681	1034.34	74.9627
	1035.38	130.636	1034.28	125.072	1033.77	122.008	1034.42	115.981	1034.16	112.886	1034.12	99.2422	1035.84	94.2177	1034.27	91.4221	1035.34	75.2138
	1036.38	131.702	1035.28	126.232	1034.77	122.297	1035.42	114.858	1035.16	113.116	1035.12	99.1229	1036.84	94.4335	1035.27	91.7022	1036.34	75.2774
	1037.38	130.687	1036.28	125.324	1035.77	122.957	1036.42	115.37	1036.16	113.009	1036.12	99.6625	1037.84	93.9297	1036.27	92.1404	1037.34	74.9541
	1038.38	130.858	1037.28	125.365	1036.77	122.214	1037.42	115.237	1037.16	113.874	1037.12	99.5682	1038.84	95.153	1037.27	92.2966	1038.34	74.2045
	1039.38	131.152	1038.28	125.971	1037.77	123.337	1038.42	115.629	1038.16	113.836	1038.12	99.605	1039.84	94.348	1038.27	92.157	1039.34	73.8378
	1040.38	130.851	1039.28	126.027	1038.77	121.133	1039.42	116.383	1039.16	114.138	1039.12	99.256	1040.84	94.7241	1039.27	92.0349	1040.34	74.8763
	1041.38	131.451	1040.28	125.926	1039.77	122.695	1040.42	115.646	1040.16	113.457	1040.12	98.9277	1041.84	94.0808	1040.27	91.6726	1041.34	75.4223
	1042.38	129.812	1041.28	126.789	1040.77	122.735	1041.42	116.208	1041.16	113.507	1041.12	99.9756	1042.84	93.134	1041.27	92.3987	1042.34	74.6881
	1043.38	129.97	1042.28	125.815	1041.77	122.41	1042.42	115.349	1042.16	112.467	1042.12	99.9591	1043.84	93.9332	1042.27	91.7337	1043.34	75.2012
	1044.38	131.072	1043.28	125.903	1042.77	122.042	1043.42	115.026	1043.16	112.249	1043.12	98.0528	1044.84	94.4084	1043.27	91.1417	1044.34	75.3288
	1045.38	130.92	1044.28	125.257	1043.77	123.733	1044.42	116.433	1044.16	112.588	1044.12	99.9198	1045.84	95.3194	1044.27	92.2093	1045.34	74.7604
	1046.38	131.839	1045.28	125.82	1044.77	122.617	1045.42	116.649	1045.16	114.171	1045.12	98.8097	1046.84	94.4026	1045.27	91.4274	1046.34	74.7022
	1047.38	131.999	1046.28	125.925	1045.77	123.024	1046.42	116.072	1046.16	113.281	1046.12	99.9185	1047.84	94.3355	1046.27	92.0089	1047.34	74.9733
	1048.38	131.182	1047.28	125.525	1046.77	122.687	1047.42	115.477	1047.16	113.421	1047.12	99.5104	1048.84	94.4627	1047.27	91.9148	1048.34	74.8815
	1049.38	131.823	1048.28	124.888	1047.77	123.16	1048.42	116.053	1048.16	112.657	1048.12	99.0352	1049.84	94.7356	1048.27	92.5076	1049.34	74.6721
	1050.38	131.625	1049.28	125.829	1048.77	123.44	1049.42	116.752	1049.16	112.53	1049.12	99.2693	1050.84	94.0686	1049.27	90.8219	1050.34	74.9285
	1051.38	131.163	1050.28	126.357	1049.77	122.781	1050.42	115.737	1050.16	113.656	1050.12	98.9343	1051.84	94.6015	1050.27	91.3392	1051.34	74.8591
	1052.38	132.534	1051.28	125.927	1050.77	123.735	1051.42	117.979	1051.16	114.291	1051.12	99.632	1052.84	94.7212	1051.27	91.6857	1052.34	74.382
	1053.38	131.502	1052.28	126.025	1051.77	121.295	1052.42	115.591	1052.16	114.094	1052.12	99.3193	1053.84	93.5117	1052.27	92.9577	1053.34	74.9055
	1054.38	131.152	1053.28	126.28	1052.77	122.226	1053.42	116.049	1053.16	113.4	1053.12	99.0601	1054.84	94.4045	1053.27	91.9985	1054.34	75.1019
	1055.38	131.154	1054.28	127.075	1053.77	121.783	1054.42	115.381	1054.16	113.866	1054.12	98.6261	1055.84	93.7532	1054.27	92.0543	1055.34	74.7105
	1056.38	131.447	1055.28	125.589	1054.77	122.906	1055.42	116.072	1055.16	112.82	1055.12	99.6091	1056.84	94.2038	1055.27	92.5175	1056.34	74.5081
	1057.38	131.075	1056.28	125.312	1055.77	123.778	1056.42	115.561	1056.16	113.509	1056.12	99.2692	1057.84	93.7147	1056.27	91.5658	1057.34	75.0701
	1058.38	131.845	1057.28	126.083	1056.77	123.181	1057.42	115.742	1057.16	113.195	1057.12	98.6434	1058.84	94.5767	1057.27	93.0206	1058.34	74.6029
	1059.38	132.59	1058.28	126.697	1057.77	122.849	1058.42	115.404	1058.16	113.004	1058.12	98.9288	1059.84	94.335	1058.27	91.7872	1059.34	74.4566
	1060.38	131.946	1059.28	125.952	1058.77	122.523	1059.42	115.421	1059.16	113.836	1059.12	98.3196	1060.84	93.9287	1059.27	91.9116	1060.34	74.0023
	1061.38	132.222	1060.28	126.926	1059.77	123.762	1060.42	116.844	1060.16	114.646	1060.12	99.1755	1061.84	94.2262	1060.27	91.6417	1061.34	75.3612
	1062.38	132.1	1061.28	125.196	1060.77	122.433	1061.42	117.039	1061.16	112.721	1061.12	98.4935	1062.84	95.1939	1061.27	91.9452	1062.34	74.5105
	1063.38	130.586	1062.28	125.651	1061.77	123.935	1062.42	116.431	1062.16	113.712	1062.12	99.0071	1063.84	95.3738	1062.27	91.8493	1063.34	74.856
	1064.38	131.471	1063.28	126.019	1062.77	122.279	1063.42	117.586	1063.16	113.099	1063.12	99.474	1064.84	94.9154	1063.27	91.1497	1064.34	74.3687
	1065.38	131.22	1064.28	126.088	1063.77	122.894	1064.42	116.228	1064.16	113.95	1064.12	99.429	1065.84	94.4163	1064.27	91.957	1065.34	74.8992
	1066.38	132.232	1065.28	126.707	1064.77	124.115	1065.42	115.904	1065.16	114.306	1065.12	99.8203	1066.84	94.9743	1065.27	92.4572	1066.34	74.9717
	1067.38	131.334	1066.28	125.347	1065.77	122.458	1066.42	115.63	1066.16	114.267	1066.12	99.0559	1067.84	94.5018	1066.27	91.8704	1067.34	74.3135
	1068.38	131.85	1067.28	126.196	1066.77	122.49	1067.42	115.942	1067.16	113.67	1067.12	99.8806	1068.84	94.1667	1067.27	91.5053	1068.34	75.4666
	1069.38	131.999	1068.28	125.928	1067.77	123.289	1068.42	116.041	1068.16	114.521	1068.12	99.2814	1069.84	94.1275	1068.27	92.4281	1069.34	74.5892
	1070.38	131.327	1069.28	127.671	1068.77	123.421	1069.42	115.257	1069.16	113.099	1069.12	99.1922	1070.84	94.1869	1069.27	91.5921	1070.34	75.5638
	1071.38	132.05	1070.28	126.085	1069.77	123.001	1070.42	116.139	1070.16	114.07	1070.12	98.9704	1071.84	93.6986	1070.27	91.9926	1071.34	73.9614
	1072.38	131.677	1071.28	126.635	1070.77	123.04	1071.42	116.565	1071.16	113.752	1071.12	99.1749	1072.84	93.9164	1071.27	91.4516	1072.34	75.415
	1073.38	130.81	1072.28	126.204	1071.77	122.751	1072.42	116.433	1072.16	114.401	1072.12	99.987	1073.84	93.9047	1072.27	92.2153	1073.34	74.7861
	1074.38	132.799	1073.28	126.805	1072.77	123.343	1073.42	117.409	1073.16	114.781	1073.12	98.6505	1074.84	95.0248	1073.27	92.1254	1074.34	74.2618
	1075.38	132.408	1074.28	127.101	1073.77	123.232	1074.42	116.541	1074.16	113.381	1074.12	99.6256	1075.84	94.6428	1074.27	91.9732	1075.34	74.5635
	1076.38	132.421	1075.28	127.267	1074.77	124.629	1075.42	116.847	1075.16	112.828	1075.12	99.2439	1076.84	94.6406	1075.27	92.8795	1076.34	74.6344
	1077.38	131.504	1076.28	126.225	1075.77	123.033	1076.42	116.987	1076.16	114.253	1076.12	98.6962	1077.84	94.7703	1076.27	92.2864	1077.34	75.4429
	1078.38	131.662	1077.28	126.716	1076.77	123.376	1077.42	116.961	1077.16	113.797	1077.12	99.2663	1078.84	94.0006	1077.27	92.3645	1078.34	74.891
	1079.38	131.528	1078.28	126.647	1077.77	123.32	1078.42	116.321	1078.16	113.748	1078.12	99.2828	1079.84	93.4569	1078.27	91.8895	1079.34	74.0323
	1080.38	132.122	1079.28	126.094	1078.77	123.809	1079.42	116.893	1079.16	114.002	1079.12	99.3618	1080.84	95.1698	1079.27	91.3533	1080.34	74.1964
	1081.38	132.313	1080.28	125.265	1079.77	122.037	1080.42	115.887	1080.16	113.704	1080.12	99.3151	1081.84	94.6597	1080.27	92.0929	1081.34	75.6712
	1082.38	130.767	1081.28	126.626	1080.77	124.154	1081.42	117.571	1081.16	115.225	1081.12	100.141	1082.84	94.7745	1081.27	91.8841	1082.34	74.9509
	1083.38	131.229	1082.28	126.911	1081.77	123.791	1082.42	116.644	1082.16	114.017	1082.12	99.8571	1083.84	94.085	1082.27	91.6766	1083.34	74.8973
	1084.38	131.258	1083.28	126.879	1082.77	123.09	1083.42	116.625	1083.16	114.267	1083.12	98.5681	1084.84	94.5907	1083.27	92.1494	1084.34	74.5742
	1085.38	131.978	1084.28	126.985	1083.77	123.673	1084.42	117.161	1084.16	113.991	1084.12	99.2211	1085.84	94.763	1084.27	92.3255	1085.34	75.2079
	1086.38	132.781	1085.28	126.734	1084.77	124.34	1085.42	116.472	1085.16	113.603	1085.12	99.1575	1086.84	93.2677	1085.27	92.0712	1086.34	74.2974
	1087.38	131.818	1086.28	127.188	1085.77	124.237	1086.42	117.198	1086.16	114.23	1086.12	99.6662	1087.84	93.8335	1086.27	91.9244	1087.34	75.237
	1088.38	132.384	1087.28	127.07	1086.77	124.469	1087.42	117.479	1087.16	114.309	1087.12	99.9349	1088.84	94.3013	1087.27	92.0856	1088.34	73.8068
	1089.38	130.802	1088.28	126.109	1087.77	124.836	1088.42	115.889	1088.16	113.768	1088.12	98.2678	1089.84	95.4846	1088.27	92.8746	1089.34	74.588
	1090.38	132.081	1089.28	127.346	1088.77	123.536	1089.42	117.334	1089.16	114.063	1089.12	99.5165	1090.84	94.4935	1089.27	91.1978	1090.34	74.06
	1091.38	131.678	1090.28	127.172	1089.77	124.032	1090.42	117.112	1090.16	114.505	1090.12	98.7184	1091.84	93.8254	1090.27	91.4795	1091.34	75.1973
	1092.38	131.909	1091.28	127.824	1090.77	122.783	1091.42	115.518	1091.16	114.935	1091.12	99.9149	1092.84	94.6954	1091.27	91.6525	1092.34	74.6161
	1093.38	132.615	1092.28	127.599	1091.77	123.026	1092.42	117.218	1092.16	113.696	1092.12	99.1938	1093.84	94.8731	1092.27	91.8307	1093.34	74.2877
	1094.38	132.29	1093.28	127.087	1092.77	124.635	1093.42	116.187	1093.16	114.732	1093.12	99.8676	1094.84	95.1139	1093.27	92.3125	1094.34	74.143
	1095.38	133.381	1094.28	126.525	1093.77	122.884	1094.42	117.182	1094.16	114.221	1094.12	100.217	1095.84	93.9974	1094.27	91.7932	1095.34	73.9589
	1096.38	133.27	1095.28	126.973	1094.77	123.036	1095.42	116.708	1095.16	114.976	1095.12	99.3237	1096.84	94.7994	1095.27	91.6952	1096.34	75.3249
	1097.38	132.268	1096.28	127.082	1095.77	123.451	1096.42	116.523	1096.16	114.746	1096.12	100.041	1097.84	93.9596	1096.27	91.7896	1097.34	74.3909
	1098.38	131.323	1097.28	127.328	1096.77	123.29	1097.42	117.858	1097.16	114.464	1097.12	99.078	1098.84	94.2283	1097.27	91.6311	1098.34	75.1168
	1099.38	132.413	1098.28	126.676	1097.77	122.958	1098.42	117.272	1098.16	113.765	1098.12	99.4352	1099.84	93.5773	1098.27	92.5613	1099.34	74.9069
	1100.38	133.343	1099.28	126.582	1098.77	123.997	1099.42	116.41	1099.16	113.257	1099.12	100.807	1100.84	95.1614	1099.27	91.6184	1100.34	75.4345
	1101.38	131.605	1100.28	127.598	1099.77	124.645	1100.42	116.66	1100.16	114.06	1100.12	100.877	1101.84	94.6905	1100.27	92.1434	1101.34	74.7387
	1102.38	133.068	1101.28	127.362	1100.77	124.486	1101.42	116.55	1101.16	114.691	1101.12	100.468	1102.84	94.3036	1101.27	92.5971	1102.34	74.655
	1103.38	132.133	1102.28	126.789	1101.77	123.63	1102.42	117.474	1102.16	113.858	1102.12	100.921	1103.84	94.4739	1102.27	92.4991	1103.34	75.1521
	1104.38	132.4	1103.28	127.547	1102.77	123.991	1103.42	117.533	1103.16	113.668	1103.12	100.072	1104.84	93.6775	1103.27	92.9952	1104.34	74.3224
	1105.38	131.566	1104.28	127.566	1103.77	123.989	1104.42	117.601	1104.16	114.583	1104.12	99.7952	1105.84	94.342	1104.27	92.2397	1105.34	75.6454
	1106.38	132.746	1105.28	127.633	1104.77	124.27	1105.42	116.095	1105.16	112.628	1105.12	100.2	1106.84	94.1399	1105.27	92.7938	1106.34	74.8436
	1107.38	132.227	1106.28	126.858	1105.77	123.688	1106.42	118.116	1106.16	114.452	1106.12	100.012	1107.84	94.232	1106.27	92.751	1107.34	75.3679
	1108.38	132.727	1107.28	126.712	1106.77	123.803	1107.42	116.176	1107.16	115.214	1107.12	99.5352	1108.84	94.139	1107.27	92.4123	1108.34	74.8946
	1109.38	132.795	1108.28	127.219	1107.77	123.515	1108.42	117.455	1108.16	115.005	1108.12	99.5873	1109.84	94.496	1108.27	91.0207	1109.34	74.8016
	1110.38	132.648	1109.28	126.934	1108.77	123.623	1109.42	117.347	1109.16	114.186	1109.12	99.6413	1110.84	95.0739	1109.27	92.2504	1110.34	75.0481
	1111.38	133.306	1110.28	126.674	1109.77	123.721	1110.42	115.924	1110.16	114.515	1110.12	99.9073	1111.84	94.7941	1110.27	91.3342	1111.34	74.3907
	1112.38	134.246	1111.28	127.086	1110.77	124.735	1111.42	117.964	1111.16	114.503	1111.12	99.6504	1112.84	94.6824	1111.27	93.43	1112.34	74.2733
	1113.38	133.485	1112.28	127.351	1111.77	123.472	1112.42	116.961	1112.16	114.445	1112.12	99.4338	1113.84	94.2596	1112.27	92.6608	1113.34	75.1846
	1114.38	133.256	1113.28	126.416	1112.77	123.526	1113.42	117.325	1113.16	114.962	1113.12	99.9094	1114.84	94.0261	1113.27	91.5112	1114.34	74.6283
	1115.38	132.262	1114.28	127.838	1113.77	123.974	1114.42	118.097	1114.16	114.622	1114.12	99.3118	1115.84	94.0267	1114.27	92.4829	1115.34	74.9623
	1116.38	133.291	1115.28	127.801	1114.77	123.851	1115.42	117.171	1115.16	115.182	1115.12	99.3368	1116.84	95.2331	1115.27	92.4705	1116.34	74.3364
	1117.38	133.543	1116.28	127.315	1115.77	123.747	1116.42	117.224	1116.16	113.679	1116.12	100.108	1117.84	94.0441	1116.27	92.3632	1117.34	74.5479
	1118.38	133.383	1117.28	127.548	1116.77	123.446	1117.42	117.186	1117.16	114.869	1117.12	99.4823	1118.84	95.0091	1117.27	91.9582	1118.34	74.8026
	1119.38	132.653	1118.28	127.281	1117.77	124.33	1118.42	117.069	1118.16	113.214	1118.12	99.5593	1119.84	93.8195	1118.27	92.1263	1119.34	76.2972
	1120.38	133.417	1119.28	126.595	1118.77	124.73	1119.42	117.286	1119.16	114.899	1119.12	99.4836	1120.84	95.2191	1119.27	91.8492	1120.34	74.8009
	1121.38	132.805	1120.28	127.072	1119.77	123.371	1120.42	116.866	1120.16	114.07	1120.12	99.0167	1121.84	94.164	1120.27	92.431	1121.34	74.879
	1122.38	132.689	1121.28	128.007	1120.77	123.411	1121.42	117.427	1121.16	113.276	1121.12	99.2336	1122.84	93.9506	1121.27	91.8149	1122.34	74.5654
	1123.38	132.275	1122.28	126.975	1121.77	123.436	1122.42	117.649	1122.16	115.104	1122.12	100.174	1123.84	94.4933	1122.27	93.1222	1123.34	74.4265
	1124.38	133.605	1123.28	126.649	1122.77	124.19	1123.42	118.781	1123.16	114.432	1123.12	100.054	1124.84	94.6312	1123.27	91.9911	1124.34	74.5572
	1125.38	132.769	1124.28	128.699	1123.77	124.171	1124.42	117.698	1124.16	115.02	1124.12	99.748	1125.84	94.9277	1124.27	91.7755	1125.34	75.0063
	1126.38	133.185	1125.28	128.113	1124.77	124.179	1125.42	118.329	1125.16	114.197	1125.12	99.6345	1126.84	94.6777	1125.27	91.7933	1126.34	74.4445
	1127.38	133.02	1126.28	128.569	1125.77	123.622	1126.42	116.443	1126.16	114.944	1126.12	100.321	1127.84	95.1491	1126.27	92.0058	1127.34	74.9275
	1128.38	132.848	1127.28	128.448	1126.77	124.012	1127.42	117.573	1127.16	113.832	1127.12	98.9727	1128.84	94.6007	1127.27	91.4627	1128.34	75.6487
	1129.38	133.698	1128.28	127.985	1127.77	124.577	1128.42	117.293	1128.16	113.977	1128.12	100.569	1129.84	94.3365	1128.27	92.7072	1129.34	75.3814
	1130.38	132.939	1129.28	126.996	1128.77	123.367	1129.42	117.657	1129.16	114.507	1129.12	101.085	1130.84	95.7008	1129.27	92.6437	1130.34	74.5039
	1131.38	132.321	1130.28	128.601	1129.77	123.368	1130.42	116.655	1130.16	114.348	1130.12	99.5783	1131.84	94.8658	1130.27	92.6987	1131.34	74.2385
	1132.38	132.959	1131.28	126.734	1130.77	124.035	1131.42	116.917	1131.16	113.934	1131.12	99.9735	1132.84	94.6452	1131.27	92.3269	1132.34	74.7782
	1133.38	132.531	1132.28	128.444	1131.77	124.178	1132.42	116.906	1132.16	115.48	1132.12	99.1067	1133.84	94.4032	1132.27	92.64	1133.34	75.0559
	1134.38	134.249	1133.28	127.524	1132.77	124.174	1133.42	117.21	1133.16	115.199	1133.12	100.05	1134.84	94.1917	1133.27	92.4851	1134.34	75.541
	1135.38	133.556	1134.28	127.14	1133.77	124.15	1134.42	118.366	1134.16	115.013	1134.12	99.5675	1135.84	95.0154	1134.27	91.1781	1135.34	75.4288
	1136.38	133.1	1135.28	127.48	1134.77	124.875	1135.42	117.563	1135.16	114.365	1135.12	99.7755	1136.84	95.5071	1135.27	91.8965	1136.34	74.1123
	1137.38	133.628	1136.28	128.116	1135.77	124.391	1136.42	116.803	1136.16	114.552	1136.12	99.8614	1137.84	94.1884	1136.27	92.2274	1137.34	75.0714
	1138.38	132.419	1137.28	128.322	1136.77	124.582	1137.42	117.073	1137.16	114.277	1137.12	100.338	1138.84	94.0675	1137.27	92.3138	1138.34	75.6957
	1139.38	133.912	1138.28	127.361	1137.77	124.907	1138.42	117.345	1138.16	115.274	1138.12	100.775	1139.84	94.6546	1138.27	91.9536	1139.34	75.1802
	1140.38	133.028	1139.28	128.513	1138.77	124.027	1139.42	117.654	1139.16	115.732	1139.12	100.76	1140.84	94.8746	1139.27	92.6618	1140.34	74.8843
	1141.38	133.8	1140.28	127.592	1139.77	124.119	1140.42	118.319	1140.16	114.114	1140.12	100.322	1141.84	94.7168	1140.27	91.8487	1141.34	75.0947
	1142.38	132.907	1141.28	127.941	1140.77	123.7	1141.42	117.766	1141.16	114.532	1141.12	100.868	1142.84	94.3338	1141.27	91.8463	1142.34	74.2031
	1143.38	133.423	1142.28	128.87	1141.77	124.614	1142.42	117.002	1142.16	115.606	1142.12	100.707	1143.84	94.8502	1142.27	92.1939	1143.34	74.8996
	1144.38	133.656	1143.28	128.032	1142.77	124.536	1143.42	117.692	1143.16	114.238	1143.12	99.4792	1144.84	93.9758	1143.27	92.6042	1144.34	75.8512
	1145.38	133.359	1144.28	127.126	1143.77	124.126	1144.42	117.876	1144.16	115.119	1144.12	99.9243	1145.84	95.1163	1144.27	91.6578	1145.34	74.0964
	1146.38	133.257	1145.28	128.44	1144.77	124.522	1145.42	118.651	1145.16	115.28	1145.12	99.762	1146.84	95.2917	1145.27	93.4688	1146.34	74.5785
	1147.38	133.749	1146.28	127.772	1145.77	124.982	1146.42	117.908	1146.16	114.955	1146.12	99.7517	1147.84	93.9692	1146.27	92.1034	1147.34	75.0579
	1148.38	133.13	1147.28	127.326	1146.77	124.712	1147.42	117.437	1147.16	114.232	1147.12	99.6838	1148.84	95.428	1147.27	92.4533	1148.34	74.2194
	1149.38	133.794	1148.28	127.372	1147.77	124.409	1148.42	118.591	1148.16	115.217	1148.12	99.7281	1149.84	94.6578	1148.27	91.7285	1149.34	75.1164
	1150.38	134.458	1149.28	128.56	1148.77	125.375	1149.42	117.492	1149.16	114.06	1149.12	99.8551	1150.84	95.2452	1149.27	92.0332	1150.34	75.3478
	1151.38	134.306	1150.28	127.318	1149.77	124.947	1150.42	117.84	1150.16	114.405	1150.12	100.925	1151.84	94.6442	1150.27	93.4456	1151.34	74.8574
	1152.38	133.422	1151.28	127.365	1150.77	124.543	1151.42	117.949	1151.16	115.608	1151.12	100.554	1152.84	94.1254	1151.27	92.7993	1152.34	73.7507
	1153.38	132.57	1152.28	127.111	1151.77	125.429	1152.42	117.846	1152.16	114.683	1152.12	100.235	1153.84	94.1968	1152.27	92.4152	1153.34	75.1273
	1154.38	133.215	1153.28	127.639	1152.77	124.428	1153.42	116.703	1153.16	113.978	1153.12	100.442	1154.84	94.4884	1153.27	92.4002	1154.34	73.7013
	1155.38	133.371	1154.28	126.68	1153.77	124.974	1154.42	117.207	1154.16	113.751	1154.12	101.007	1155.84	94.2989	1154.27	92.0403	1155.34	74.4968
	1156.38	132.583	1155.28	127.974	1154.77	123.622	1155.42	117.645	1155.16	115.229	1155.12	99.9631	1156.84	93.6911	1155.27	91.0415	1156.34	73.8525
	1157.38	133.379	1156.28	127.607	1155.77	124.517	1156.42	118.163	1156.16	115.056	1156.12	100.623	1157.84	95.2914	1156.27	92.7975	1157.34	74.5256
	1158.38	134.126	1157.28	127.781	1156.77	124.992	1157.42	117.915	1157.16	114.468	1157.12	99.7042	1158.84	94.2968	1157.27	91.8807	1158.34	74.8129
	1159.38	133.412	1158.28	128.271	1157.77	124.691	1158.42	118.017	1158.16	114.179	1158.12	100.219	1159.84	94.8718	1158.27	92.498	1159.34	74.5847
	1160.38	134.056	1159.28	128.071	1158.77	124.023	1159.42	118.493	1159.16	114.461	1159.12	100.007	1160.84	95.6062	1159.27	93.1085	1160.34	75.0245
	1161.38	133.398	1160.28	128.77	1159.77	125.657	1160.42	117.072	1160.16	115.372	1160.12	100.129	1161.84	95.2673	1160.27	91.5633	1161.34	75.0082
	1162.38	134.189	1161.28	127.921	1160.77	122.958	1161.42	118.913	1161.16	114.786	1161.12	100.309	1162.84	94.4787	1161.27	92.4912	1162.34	74.6904
	1163.38	134.657	1162.28	129.263	1161.77	124.708	1162.42	118.387	1162.16	114.116	1162.12	99.9439	1163.84	94.8981	1162.27	92.525	1163.34	75.2963
	1164.38	134.898	1163.28	127.943	1162.77	125.303	1163.42	117.372	1163.16	114.869	1163.12	101.175	1164.84	95.0823	1163.27	91.7838	1164.34	75.2414
	1165.38	134.688	1164.28	128.999	1163.77	124.323	1164.42	117.555	1164.16	115.029	1164.12	101.305	1165.84	94.2478	1164.27	91.97	1165.34	75.2134
	1166.38	133.989	1165.28	128.498	1164.77	124.915	1165.42	118.295	1165.16	114.793	1165.12	100.183	1166.84	94.6933	1165.27	92.6688	1166.34	74.7811
	1167.38	134.224	1166.28	128.728	1165.77	124.381	1166.42	117.741	1166.16	115.084	1166.12	99.6383	1167.84	95.7758	1166.27	92.0535	1167.34	75.1514
	1168.38	134.768	1167.28	127.62	1166.77	124.303	1167.42	117.44	1167.16	115.245	1167.12	101.016	1168.84	95.0186	1167.27	92.6773	1168.34	74.8511
	1169.38	133.676	1168.28	127.725	1167.77	125.225	1168.42	118.488	1168.16	115.949	1168.12	100.467	1169.84	94.6252	1168.27	93.0543	1169.34	74.1867
	1170.38	133.233	1169.28	128.535	1168.77	125.908	1169.42	118.385	1169.16	114.411	1169.12	99.9985	1170.84	93.9821	1169.27	92.9764	1170.34	75.1531
	1171.38	134.387	1170.28	129.195	1169.77	126.089	1170.42	118.3	1170.16	115.109	1170.12	100.16	1171.84	94.2953	1170.27	92.7321	1171.34	74.2366
	1172.38	134.407	1171.28	129.343	1170.77	125.894	1171.42	117.097	1171.16	114.126	1171.12	99.5319	1172.84	94.4162	1171.27	92.1476	1172.34	74.5328
	1173.38	133.03	1172.28	128.675	1171.77	125.574	1172.42	117.531	1172.16	114.794	1172.12	99.8955	1173.84	94.1948	1172.27	92.7127	1173.34	75.0222
	1174.38	135.31	1173.28	128.774	1172.77	124.132	1173.42	117.722	1173.16	115.123	1173.12	99.7436	1174.84	95.1485	1173.27	92.8413	1174.34	74.747
	1175.38	133.926	1174.28	127.851	1173.77	125.842	1174.42	118.454	1174.16	115.038	1174.12	100.905	1175.84	94.0453	1174.27	92.4414	1175.34	75.1066
	1176.38	134.778	1175.28	127.541	1174.77	124.82	1175.42	117.836	1175.16	115.618	1175.12	100.382	1176.84	94.3724	1175.27	92.9684	1176.34	75.5845
	1177.38	134.077	1176.28	128.345	1175.77	124.594	1176.42	117.255	1176.16	113.773	1176.12	100.408	1177.84	95.1867	1176.27	92.3718	1177.34	73.8379
	1178.38	135.322	1177.28	128.855	1176.77	124.884	1177.42	119.211	1177.16	114.406	1177.12	100.627	1178.84	95.3553	1177.27	92.01	1178.34	75.067
	1179.38	134.128	1178.28	128.856	1177.77	124.686	1178.42	118.142	1178.16	115.911	1178.12	100.739	1179.84	95.1562	1178.27	92.4414	1179.34	73.6785
	1180.38	134.232	1179.28	129.349	1178.77	125.967	1179.42	117.643	1179.16	114.525	1179.12	100.623	1180.84	94.6766	1179.27	92.3122	1180.34	74.9215
	1181.38	135.369	1180.28	129.742	1179.77	125.776	1180.42	117.456	1180.16	113.514	1180.12	100.824	1181.84	95.2379	1180.27	93.0295	1181.34	75.2568
	1182.38	133.925	1181.28	129.803	1180.77	125.853	1181.42	118.07	1181.16	114.537	1181.12	100.402	1182.84	94.6545	1181.27	92.045	1182.34	74.3035
	1183.38	134.065	1182.28	129.34	1181.77	125.163	1182.42	117.594	1182.16	115.604	1182.12	100.223	1183.84	95.2836	1182.27	92.591	1183.34	75.3651
	1184.38	133.596	1183.28	128.251	1182.77	125.738	1183.42	118.239	1183.16	114.712	1183.12	100.471	1184.84	94.7054	1183.27	92.0686	1184.34	74.8048
	1185.38	134.219	1184.28	129.519	1183.77	124.196	1184.42	117.725	1184.16	115.223	1184.12	99.9782	1185.84	95.1947	1184.27	92.8014	1185.34	74.8372
	1186.38	135.025	1185.28	128.703	1184.77	124.356	1185.42	119.451	1185.16	114.866	1185.12	99.4353	1186.84	95.0188	1185.27	92.0997	1186.34	74.9799
	1187.38	134.922	1186.28	128.767	1185.77	125.321	1186.42	117.978	1186.16	114.786	1186.12	99.7155	1187.84	94.8387	1186.27	92.5517	1187.34	75.212
	1188.38	133.375	1187.28	128.692	1186.77	124.849	1187.42	119.154	1187.16	114.74	1187.12	99.5584	1188.84	94.8175	1187.27	92.7837	1188.34	74.2991
	1189.38	134.446	1188.28	128.876	1187.77	124.702	1188.42	118.851	1188.16	115.09	1188.12	100.109	1189.84	95.1908	1188.27	92.5357	1189.34	74.3213
	1190.38	134.761	1189.28	129.325	1188.77	124.94	1189.42	119.296	1189.16	114.912	1189.12	100.252	1190.84	94.6898	1189.27	92.9867	1190.34	74.9727
	1191.38	135.42	1190.28	128.211	1189.77	125.525	1190.42	118.621	1190.16	115.104	1190.12	99.6577	1191.84	95.1118	1190.27	92.9725	1191.34	75.4015
	1192.38	134.712	1191.28	129.09	1190.77	124.709	1191.42	117.197	1191.16	115.732	1191.12	100.832	1192.84	95.7417	1191.27	92.6793	1192.34	74.8311
	1193.38	134.55	1192.28	129.214	1191.77	125.335	1192.42	119.994	1192.16	116.468	1192.12	100.567	1193.84	95.1545	1192.27	92.1346	1193.34	74.4214
	1194.38	135.219	1193.28	129.038	1192.77	125.01	1193.42	118.619	1193.16	115.827	1193.12	100.528	1194.84	94.8488	1193.27	93.0413	1194.34	74.9055
	1195.38	133.419	1194.28	128.986	1193.77	125.718	1194.42	119.079	1194.16	114.501	1194.12	100.268	1195.84	94.6722	1194.27	92.5377	1195.34	74.847
	1196.38	135.402	1195.28	129.222	1194.77	124.342	1195.42	118.157	1195.16	115.593	1195.12	99.9669	1196.84	94.5375	1195.27	91.7576	1196.34	74.9015
	1197.38	134.575	1196.28	128.453	1195.77	126.184	1196.42	118.269	1196.16	115.451	1196.12	99.6622	1197.84	94.3741	1196.27	92.71	1197.34	74.5512
	1198.38	135.38	1197.28	128.767	1196.77	124.314	1197.42	118.702	1197.16	113.996	1197.12	100.885	1198.84	94.4705	1197.27	93.194	1198.34	75.4315
	1199.38	133.987	1198.28	129.824	1197.77	124.633	1198.42	119.604	1198.16	116.299	1198.12	100.956	1199.84	94.9134	1198.27	92.6543	1199.34	74.9621
	1200.38	134.837	1199.28	129.327	1198.77	125.939	1199.42	118.913	1199.16	115.632	1199.12	100.921	1200.84	94.4301	1199.27	92.4411	1200.34	73.9109
			1200.28	129.061	1199.77	125.984	1200.42	118.72	1200.16	115.785	1200.12	100.324			1200.27	93.1959
					1200.77	126.898
	11th Cleaved 5-9 Titrations Control		11th Cleaved 5-9 Titrations 100pM		11th Cleaved 5-9 Titrations 500pM		11th Cleaved 5-9 Titrations 1nM		11th Cleaved 5-9 Titrations 2nM		11th Cleaved 5-9 Titrations 5nM		11th Cleaved 5-9 Titrations 10nM		11th Cleaved 5-9 Titrations 20nM		11th Cleaved 5-9 Titrations 100nM
	11th Cleaved 5-9 Titrations Control		11th Cleaved 5-9 Titrations 100pM		11th Cleaved 5-9 Titrations 500pM		11th Cleaved 5-9 Titrations 1nM		11th Cleaved 5-9 Titrations 2nM		11th Cleaved 5-9 Titrations 5nM		11th Cleaved 5-9 Titrations 10nM		11th Cleaved 5-9 Titrations 20nM		11th Cleaved 5-9 Titrations 100nM
	Collection Time: 11/03/2020 10:46:33		Collection Time: 11/03/2020 11:10:31		Collection Time: 11/03/2020 11:33:30		Collection Time: 11/03/2020 11:58:21		Collection Time: 11/03/2020 12:23:39		Collection Time: 11/03/2020 12:49:31		Collection Time: 11/03/2020 13:17:33		Collection Time: 11/03/2020 13:44:54		Collection Time: 11/03/2020 14:09:41
	Operator Name :		Operator Name :		Operator Name :		Operator Name :		Operator Name :		Operator Name :		Operator Name :		Operator Name :		Operator Name :
	Kinetics Software Version: 1.1(133)		Kinetics Software Version: 1.1(133)		Kinetics Software Version: 1.1(133)		Kinetics Software Version: 1.1(133)		Kinetics Software Version: 1.1(133)		Kinetics Software Version: 1.1(133)		Kinetics Software Version: 1.1(133)		Kinetics Software Version: 1.1(133)		Kinetics Software Version: 1.1(133)
	Parameter List :		Parameter List :		Parameter List :		Parameter List :		Parameter List :		Parameter List :		Parameter List :		Parameter List :		Parameter List :
	Report Time: Wed 11 Mar 10:46:33 AM 2020		Report Time: Wed 11 Mar 11:10:31 AM 2020		Report Time: Wed 11 Mar 11:33:30 AM 2020		Report Time: Wed 11 Mar 11:58:21 AM 2020		Report Time: Wed 11 Mar 12:23:39 PM 2020		Report Time: Wed 11 Mar 12:49:31 PM 2020		Report Time: Wed 11 Mar 01:17:33 PM 2020		Report Time: Wed 11 Mar 01:44:54 PM 2020		Report Time: Wed 11 Mar 02:09:41 PM 2020
	Software version: 1.1(133)		Software version: 1.1(133)		Software version: 1.1(133)		Software version: 1.1(133)		Software version: 1.1(133)		Software version: 1.1(133)		Software version: 1.1(133)		Software version: 1.1(133)		Software version: 1.1(133)
	Operator:		Operator:		Operator:		Operator:		Operator:		Operator:		Operator:		Operator:		Operator:
	Instrument Parameters		Instrument Parameters		Instrument Parameters		Instrument Parameters		Instrument Parameters		Instrument Parameters		Instrument Parameters		Instrument Parameters		Instrument Parameters
	Instrument Cary Eclipse		Instrument Cary Eclipse		Instrument Cary Eclipse		Instrument Cary Eclipse		Instrument Cary Eclipse		Instrument Cary Eclipse		Instrument Cary Eclipse		Instrument Cary Eclipse		Instrument Cary Eclipse
	Instrument Serial Number EL07063152		Instrument Serial Number EL07063152		Instrument Serial Number EL07063152		Instrument Serial Number EL07063152		Instrument Serial Number EL07063152		Instrument Serial Number EL07063152		Instrument Serial Number EL07063152		Instrument Serial Number EL07063152		Instrument Serial Number EL07063152
	Data mode Fluorescence		Data mode Fluorescence		Data mode Fluorescence		Data mode Fluorescence		Data mode Fluorescence		Data mode Fluorescence		Data mode Fluorescence		Data mode Fluorescence		Data mode Fluorescence
	Ex. wavelength (nm) 430.00		Ex. wavelength (nm) 430.00		Ex. wavelength (nm) 430.00		Ex. wavelength (nm) 430.00		Ex. wavelength (nm) 430.00		Ex. wavelength (nm) 430.00		Ex. wavelength (nm) 430.00		Ex. wavelength (nm) 430.00		Ex. wavelength (nm) 430.00
	Em. wavelength (nm) 475.00		Em. wavelength (nm) 475.00		Em. wavelength (nm) 475.00		Em. wavelength (nm) 475.00		Em. wavelength (nm) 475.00		Em. wavelength (nm) 475.00		Em. wavelength (nm) 475.00		Em. wavelength (nm) 475.00		Em. wavelength (nm) 475.00
	Ex. Slit (nm) 10		Ex. Slit (nm) 10		Ex. Slit (nm) 10		Ex. Slit (nm) 10		Ex. Slit (nm) 10		Ex. Slit (nm) 10		Ex. Slit (nm) 10		Ex. Slit (nm) 10		Ex. Slit (nm) 10
	Em. Slit (nm) 5		Em. Slit (nm) 5		Em. Slit (nm) 5		Em. Slit (nm) 5		Em. Slit (nm) 5		Em. Slit (nm) 5		Em. Slit (nm) 5		Em. Slit (nm) 5		Em. Slit (nm) 5
	Averaging Time (s) 1.0000		Averaging Time (s) 1.0000		Averaging Time (s) 1.0000		Averaging Time (s) 1.0000		Averaging Time (s) 1.0000		Averaging Time (s) 1.0000		Averaging Time (s) 1.0000		Averaging Time (s) 1.0000		Averaging Time (s) 1.0000
	Cycle time(s) 0.0000		Cycle time(s) 0.0000		Cycle time(s) 0.0000		Cycle time(s) 0.0000		Cycle time(s) 0.0000		Cycle time(s) 0.0000		Cycle time(s) 0.0000		Cycle time(s) 0.0000		Cycle time(s) 0.0000
	Stop time(s) 1200.0000		Stop time(s) 1200.0000		Stop time(s) 1200.0000		Stop time(s) 1200.0000		Stop time(s) 1200.0000		Stop time(s) 1200.0000		Stop time(s) 1200.0000		Stop time(s) 1200.0000		Stop time(s) 1200.0000
	Emission filter Open		Emission filter Open		Emission filter Open		Emission filter Open		Emission filter Open		Emission filter Open		Emission filter Open		Emission filter Open		Emission filter Open
	Excitation Filter Auto		Excitation Filter Auto		Excitation Filter Auto		Excitation Filter Auto		Excitation Filter Auto		Excitation Filter Auto		Excitation Filter Auto		Excitation Filter Auto		Excitation Filter Auto
	PMT voltage (V) High		PMT voltage (V) High		PMT voltage (V) High		PMT voltage (V) High		PMT voltage (V) High		PMT voltage (V) High		PMT voltage (V) High		PMT voltage (V) High		PMT voltage (V) High
	Comments:		Comments:		Comments:		Comments:		Comments:		Comments:		Comments:		Comments:		Comments:
	Method Log :		Method Log :		Method Log :		Method Log :		Method Log :		Method Log :		Method Log :		Method Log :		Method Log :
	Method Name : C:\Documents and Settings\eclipse\My Documents\Eclipse_Users\Emma&Emma\AddAB Reaction Improved.FMKN		Method Name : C:\Documents and Settings\eclipse\My Documents\Eclipse_Users\Emma&Emma\AddAB Reaction Improved.FMKN		Method Name : C:\Documents and Settings\eclipse\My Documents\Eclipse_Users\Emma&Emma\Checks\AddAB Reaction Improved.FMKN		Method Name : C:\Documents and Settings\eclipse\My Documents\Eclipse_Users\Emma&Emma\Checks\AddAB Reaction Improved.FMKN		Method Name : C:\Documents and Settings\eclipse\My Documents\Eclipse_Users\Emma&Emma\Checks\AddAB Reaction Improved.FMKN		Method Name : C:\Documents and Settings\eclipse\My Documents\Eclipse_Users\Emma&Emma\Checks\AddAB Reaction Improved.FMKN		Method Name : C:\Documents and Settings\eclipse\My Documents\Eclipse_Users\Emma&Emma\Checks\AddAB Reaction Improved.FMKN		Method Name : C:\Documents and Settings\eclipse\My Documents\Eclipse_Users\Emma&Emma\AddAB Reaction Improved.FMKN		Method Name : C:\Documents and Settings\eclipse\My Documents\Eclipse_Users\Emma&Emma\AddAB Reaction Improved.FMKN
	Date/Time stamp: 26/02/2020 12:10:23		Date/Time stamp: 26/02/2020 12:10:23		Date/Time stamp: 26/02/2020 12:10:23		Date/Time stamp: 26/02/2020 12:10:23		Date/Time stamp: 26/02/2020 12:10:23		Date/Time stamp: 26/02/2020 12:10:23		Date/Time stamp: 26/02/2020 12:10:23		Date/Time stamp: 26/02/2020 12:10:23		Date/Time stamp: 26/02/2020 12:10:23
	Method Modifications:		Method Modifications:		Method Modifications:		Method Modifications:		Method Modifications:		Method Modifications:		Method Modifications:		Method Modifications:		Method Modifications:
	Excitation Wavelength Changed: 21/02/2020 15:10:08	Old: 400.00	Excitation Wavelength Changed: 21/02/2020 15:10:08	Old: 400.00	Excitation Wavelength Changed: 21/02/2020 15:10:08	Old: 400.00	Excitation Wavelength Changed: 21/02/2020 15:10:08	Old: 400.00	Excitation Wavelength Changed: 21/02/2020 15:10:08	Old: 400.00	Excitation Wavelength Changed: 21/02/2020 15:10:08	Old: 400.00	Excitation Wavelength Changed: 21/02/2020 15:10:08	Old: 400.00	Excitation Wavelength Changed: 21/02/2020 15:10:08	Old: 400.00	Excitation Wavelength Changed: 21/02/2020 15:10:08	Old: 400.00
	Emission Wavelength Changed: 21/02/2020 15:10:08	Old: 600.00	Emission Wavelength Changed: 21/02/2020 15:10:08	Old: 600.00	Emission Wavelength Changed: 21/02/2020 15:10:08	Old: 600.00	Emission Wavelength Changed: 21/02/2020 15:10:08	Old: 600.00	Emission Wavelength Changed: 21/02/2020 15:10:08	Old: 600.00	Emission Wavelength Changed: 21/02/2020 15:10:08	Old: 600.00	Emission Wavelength Changed: 21/02/2020 15:10:08	Old: 600.00	Emission Wavelength Changed: 21/02/2020 15:10:08	Old: 600.00	Emission Wavelength Changed: 21/02/2020 15:10:08	Old: 600.00
	Ex. Slit Width (nm): Changed: 21/02/2020 15:10:08	Old:5	Ex. Slit Width (nm): Changed: 21/02/2020 15:10:08	Old:5	Ex. Slit Width (nm): Changed: 21/02/2020 15:10:08	Old:5	Ex. Slit Width (nm): Changed: 21/02/2020 15:10:08	Old:5	Ex. Slit Width (nm): Changed: 21/02/2020 15:10:08	Old:5	Ex. Slit Width (nm): Changed: 21/02/2020 15:10:08	Old:5	Ex. Slit Width (nm): Changed: 21/02/2020 15:10:08	Old:5	Ex. Slit Width (nm): Changed: 21/02/2020 15:10:08	Old:5	Ex. Slit Width (nm): Changed: 21/02/2020 15:10:08	Old:5
	X mode Changed: 21/02/2020 15:10:08	Old:min	X mode Changed: 21/02/2020 15:10:08	Old:min	X mode Changed: 21/02/2020 15:10:08	Old:min	X mode Changed: 21/02/2020 15:10:08	Old:min	X mode Changed: 21/02/2020 15:10:08	Old:min	X mode Changed: 21/02/2020 15:10:08	Old:min	X mode Changed: 21/02/2020 15:10:08	Old:min	X mode Changed: 21/02/2020 15:10:08	Old:min	X mode Changed: 21/02/2020 15:10:08	Old:min
	Ave. time (s): Changed: 21/02/2020 15:10:08	Old:0.10000	Ave. time (s): Changed: 21/02/2020 15:10:08	Old:0.10000	Ave. time (s): Changed: 21/02/2020 15:10:08	Old:0.10000	Ave. time (s): Changed: 21/02/2020 15:10:08	Old:0.10000	Ave. time (s): Changed: 21/02/2020 15:10:08	Old:0.10000	Ave. time (s): Changed: 21/02/2020 15:10:08	Old:0.10000	Ave. time (s): Changed: 21/02/2020 15:10:08	Old:0.10000	Ave. time (s): Changed: 21/02/2020 15:10:08	Old:0.10000	Ave. time (s): Changed: 21/02/2020 15:10:08	Old:0.10000
	Stop Time 1 Changed: 21/02/2020 15:10:08	Old: 1.0000	Stop Time 1 Changed: 21/02/2020 15:10:08	Old: 1.0000	Stop Time 1 Changed: 21/02/2020 15:10:08	Old: 1.0000	Stop Time 1 Changed: 21/02/2020 15:10:08	Old: 1.0000	Stop Time 1 Changed: 21/02/2020 15:10:08	Old: 1.0000	Stop Time 1 Changed: 21/02/2020 15:10:08	Old: 1.0000	Stop Time 1 Changed: 21/02/2020 15:10:08	Old: 1.0000	Stop Time 1 Changed: 21/02/2020 15:10:08	Old: 1.0000	Stop Time 1 Changed: 21/02/2020 15:10:08	Old: 1.0000
	PMT Volts Changed: 21/02/2020 15:10:26	Old:600	PMT Volts Changed: 21/02/2020 15:10:26	Old:600	PMT Volts Changed: 21/02/2020 15:10:26	Old:600	PMT Volts Changed: 21/02/2020 15:10:26	Old:600	PMT Volts Changed: 21/02/2020 15:10:26	Old:600	PMT Volts Changed: 21/02/2020 15:10:26	Old:600	PMT Volts Changed: 21/02/2020 15:10:26	Old:600	PMT Volts Changed: 21/02/2020 15:10:26	Old:600	PMT Volts Changed: 21/02/2020 15:10:26	Old:600
	Emission PMT (V): Changed: 21/02/2020 15:10:26	Old: 600	Emission PMT (V): Changed: 21/02/2020 15:10:26	Old: 600	Emission PMT (V): Changed: 21/02/2020 15:10:26	Old: 600	Emission PMT (V): Changed: 21/02/2020 15:10:26	Old: 600	Emission PMT (V): Changed: 21/02/2020 15:10:26	Old: 600	Emission PMT (V): Changed: 21/02/2020 15:10:26	Old: 600	Emission PMT (V): Changed: 21/02/2020 15:10:26	Old: 600	Emission PMT (V): Changed: 21/02/2020 15:10:26	Old: 600	Emission PMT (V): Changed: 21/02/2020 15:10:26	Old: 600
	Stop Time 1 Changed: 25/02/2020 14:47:32	Old:600.0000	Stop Time 1 Changed: 25/02/2020 14:47:32	Old:600.0000	Stop Time 1 Changed: 25/02/2020 14:47:32	Old:600.0000	Stop Time 1 Changed: 25/02/2020 14:47:32	Old:600.0000	Stop Time 1 Changed: 25/02/2020 14:47:32	Old:600.0000	Stop Time 1 Changed: 25/02/2020 14:47:32	Old:600.0000	Stop Time 1 Changed: 25/02/2020 14:47:32	Old:600.0000	Stop Time 1 Changed: 25/02/2020 14:47:32	Old:600.0000	Stop Time 1 Changed: 25/02/2020 14:47:32	Old:600.0000
	Stop Time 1 Changed: 26/02/2020 11:49:31	Old:900.0000	Stop Time 1 Changed: 26/02/2020 11:49:31	Old:900.0000	Stop Time 1 Changed: 26/02/2020 11:49:31	Old:900.0000	Stop Time 1 Changed: 26/02/2020 11:49:31	Old:900.0000	Stop Time 1 Changed: 26/02/2020 11:49:31	Old:900.0000	Stop Time 1 Changed: 26/02/2020 11:49:31	Old:900.0000	Stop Time 1 Changed: 26/02/2020 11:49:31	Old:900.0000	Stop Time 1 Changed: 26/02/2020 11:49:31	Old:900.0000	Stop Time 1 Changed: 26/02/2020 11:49:31	Old:900.0000
	End Method Modifications		End Method Modifications		End Method Modifications		End Method Modifications		End Method Modifications		End Method Modifications		End Method Modifications		End Method Modifications		End Method Modifications

## Sheet: Repeat 2
gp5.9:	Control		100pM		500pM		1nM		2nM		5nM		10nM		20nM		100nM
	Time (s)	Fluoro	Time (s)	Fluoro	Time (s)	Fluoro	Time (s)	Fluoro	Time (s)	Fluoro	Time (s)	Fluoro	Time (s)	Fluoro	Time (s)	Fluoro	Time (s)	Fluoro
	0.5	83.2085	0.5	87.3706	0.5	88.3798	0.5	86.5488	0.5	87.4294	0.5	85.5319	0.5	85.2573	0.5	82.6373	0.5	79.1819
	1.5	84.7797	1.5	87.8107	1.5	89.4828	1.5	87.0626	1.5	88.0998	1.5	85.9201	1.5	86.6494	1.5	82.8057	1.5	79.7429
	2.5	84.3056	2.5	89.1431	2.5	89.0378	2.5	87.0504	2.5	88.9335	2.5	85.4405	2.5	86.11	2.5	83.6271	2.5	79.7125
	3.5	84.1087	3.5	88.1311	3.5	90.5606	3.5	87.8978	3.5	88.3948	3.5	85.0392	3.5	85.5651	3.5	82.9885	3.5	80.5183
	4.5	84.6912	4.5	88.6368	4.5	89.6876	4.5	87.4565	4.5	87.6534	4.5	85.6221	4.5	85.6224	4.5	82.1458	4.5	80.4517
	5.5	84.2594	5.5	88.4047	5.5	90.1935	5.5	88.7635	5.5	88.8182	5.5	85.3734	5.5	85.6002	5.5	83.5849	5.5	80.3636
	6.5	84.3322	6.5	87.9743	6.5	91.2745	6.5	87.5915	6.5	88.2585	6.5	85.4556	6.5	85.0098	6.5	81.6232	6.5	80.0182
	7.5	83.8202	7.5	87.7875	7.5	91.8973	7.5	87.1295	7.5	88.3745	7.5	84.6301	7.5	85.3421	7.5	82.8582	7.5	80.634
	8.5	83.8597	8.5	88.1326	8.5	91.1414	8.5	87.2214	8.5	88.0436	8.5	84.8906	8.5	85.6223	8.5	82.0059	8.5	80.5402
	9.5	83.6067	9.5	87.9278	9.5	90.8539	9.5	87.1416	9.5	87.9829	9.5	85.8233	9.5	84.9957	9.5	82.5085	9.5	79.1987
	10.5	84.3973	10.5	87.9874	10.5	91.0071	10.5	86.8182	10.5	88.0472	10.5	85.081	10.5	85.3346	10.5	83.2484	10.5	80.7455
	11.5	84.5556	11.5	87.3896	11.5	89.3025	11.5	86.9499	11.5	87.6697	11.5	85.8423	11.5	85.0137	11.5	83.1664	11.5	79.7704
	12.5	83.9725	12.5	87.8542	12.5	89.502	12.5	87.2245	12.5	88.5244	12.5	85.9814	12.5	85.5746	12.5	82.9095	12.5	79.3268
	13.5	84.2693	13.5	88.3731	13.5	88.8995	13.5	86.3704	13.5	88.4123	13.5	84.9801	13.5	85.7929	13.5	83.07	13.5	79.1935
	14.5	84.2915	14.5	87.6563	14.5	88.6352	14.5	86.5492	14.5	88.4379	14.5	85.8039	14.5	85.9092	14.5	83.2054	14.5	79.3797
	15.5	83.9151	15.5	88.2739	15.5	88.7489	15.5	86.7204	15.5	87.8294	15.5	86.0265	15.5	85.4357	15.5	82.346	15.5	81.1221
	16.5	84.43	16.5	88.1635	16.5	88.2397	16.5	87.5012	16.5	87.4903	16.5	85.2406	16.5	86.6139	16.5	82.5244	16.5	80.2794
	17.5	83.7614	17.5	89.0307	17.5	89.4053	17.5	87.8121	17.5	88.0828	17.5	85.408	17.5	85.9962	17.5	81.9855	17.5	80.0266
	18.5	83.5201	18.5	88.8802	18.5	90.0904	18.5	86.8013	18.5	87.7144	18.5	85.4159	18.5	84.8587	18.5	82.4021	18.5	80.5731
	19.5	83.9339	19.5	88.2449	19.5	88.3286	19.5	86.8307	19.5	87.5501	19.5	85.0427	19.5	85.1605	19.5	83.5653	19.5	79.6415
	20.5	83.5821	20.5	88.5309	20.5	89.0151	20.5	87.3921	20.5	87.5899	20.5	84.9553	20.5	86.1924	20.5	82.8043	20.5	81.1145
	21.5	84.3578	21.5	88.8124	21.5	87.4614	21.5	86.9304	21.5	88.764	21.5	85.1658	21.5	85.8599	21.5	83.3374	21.5	80.0879
	22.5	84.0519	22.5	87.6497	22.5	89.3864	22.5	87.1182	22.5	87.6686	22.5	85.5879	22.5	85.8874	22.5	83.5248	22.5	79.9211
	23.5	84.0388	23.5	88.431	23.5	89.1872	23.5	87.2464	23.5	88.2617	23.5	85.3818	23.5	85.1622	23.5	82.7955	23.5	80.2872
	24.5	84.2307	24.5	88.3231	24.5	89.4506	24.5	87.1373	24.5	88.3395	24.5	85.1803	24.5	85.9784	24.5	83.0482	24.5	79.875
	25.5	84.3843	25.5	88.0265	25.5	88.8696	25.5	86.8271	25.5	88.4432	25.5	85.1422	25.5	86.0682	25.5	82.9758	25.5	79.5733
	26.5	83.2034	26.5	87.6422	26.5	89.2322	26.5	86.5942	26.5	87.597	26.5	85.0307	26.5	85.2764	26.5	83.3343	26.5	79.7707
	27.5	83.4125	27.5	88.2498	27.5	89.3591	27.5	87.5333	27.5	87.6268	27.5	84.381	27.5	86.974	27.5	83.3522	27.5	80.6782
	28.5	83.8682	28.5	88.4	28.5	88.2378	28.5	87.6834	28.5	88.962	28.5	85.4765	28.5	85.1461	28.5	82.2386	28.5	80.3925
	29.5	84.3977	29.5	87.5039	29.5	88.5507	29.5	87.4387	29.5	87.7426	29.5	84.8841	29.5	85.7254	29.5	83.1243	29.5	80.8091
	30.5	83.3346	30.5	88.3746	30.5	89.084	30.5	87.5264	30.5	88.1242	30.5	85.2972	30.5	85.5276	30.5	82.6015	30.5	80.5613
	31.5	83.1521	31.5	89.381	31.5	89.301	31.5	87.2169	31.5	87.6654	31.5	85.2716	31.5	86.379	31.5	83.0178	31.5	80.1337
	32.5	83.8267	32.5	87.7096	32.5	89.1328	32.5	85.5546	32.5	88.1478	32.5	85.7767	32.5	85.8657	32.5	82.6181	32.5	80.512
	33.5	84.3746	33.5	88.9677	33.5	88.5951	33.5	86.4314	33.5	87.7503	33.5	84.8727	33.5	86.4683	33.5	82.0325	33.5	79.4411
	34.5	83.5697	34.5	88.2549	34.5	88.582	34.5	87.3731	34.5	86.8289	34.5	85.3664	34.5	86.5183	34.5	81.8624	34.5	80.1952
	35.5	83.8233	35.5	88.94	35.5	88.1578	35.5	86.3235	35.5	87.8017	35.5	86.3312	35.5	86.5225	35.5	82.0076	35.5	80.2315
	36.5	83.1877	36.5	88.1275	36.5	89.5543	36.5	85.89	36.5	87.9736	36.5	84.6518	36.5	85.2847	36.5	82.0323	36.5	80.4326
	37.5	83.8086	37.5	88.2363	37.5	88.9027	37.5	87.0757	37.5	88.1153	37.5	85.3832	37.5	86.299	37.5	82.525	37.5	80.0789
	38.5	83.4457	38.5	88.5517	38.5	87.908	38.5	86.6384	38.5	86.9494	38.5	85.7759	38.5	84.8061	38.5	83.1401	38.5	80.0819
	39.5	83.4634	39.5	88.9037	39.5	88.7796	39.5	86.1229	39.5	88.0386	39.5	84.8744	39.5	86.4471	39.5	82.0997	39.5	80.173
	40.5	83.5361	40.5	88.3676	40.5	88.6195	40.5	86.8811	40.5	88.6991	40.5	85.3672	40.5	85.8076	40.5	81.9057	40.5	78.828
	41.5	82.9258	41.5	88.4728	41.5	89.028	41.5	86.5202	41.5	87.2033	41.5	84.8297	41.5	85.5163	41.5	82.0148	41.5	80.7239
	42.5	83.1423	42.5	87.9262	42.5	89.119	42.5	87.2621	42.5	87.3935	42.5	85.6945	42.5	84.601	42.5	83.7555	42.5	79.8722
	43.5	83.1505	43.5	88.3511	43.5	89.3047	43.5	86.378	43.5	87.774	43.5	85.6159	43.5	85.1909	43.5	83.2309	43.5	80.2949
	44.5	83.5605	44.5	86.9042	44.5	88.1659	44.5	86.3732	44.5	87.2373	44.5	85.6954	44.5	84.9018	44.5	81.4937	44.5	80.837
	45.5	83.7492	45.5	88.4349	45.5	90.0117	45.5	86.6936	45.5	88.3401	45.5	85.0188	45.5	84.1437	45.5	82.2928	45.5	80.8775
	46.5	83.5991	46.5	88.6692	46.5	89.4003	46.5	87.2893	46.5	88.3609	46.5	85.5016	46.5	85.7891	46.5	83.2913	46.5	79.9946
	47.5	82.543	47.5	87.7201	47.5	89.3155	47.5	86.8677	47.5	87.2095	47.5	85.606	47.5	85.44	47.5	82.6918	47.5	80.6789
	48.5	84.2079	48.5	88.0554	48.5	89.5127	48.5	86.7356	48.5	87.899	48.5	85.2938	48.5	85.6918	48.5	81.9947	48.5	80.8957
	49.5	82.8785	49.5	87.6526	49.5	89.1348	49.5	85.9479	49.5	87.7253	49.5	85.2821	49.5	86.1679	49.5	82.5724	49.5	80.0091
	50.5	83.884	50.5	88.9343	50.5	89.419	50.5	87.0002	50.5	88.6091	50.5	85.1745	50.5	86.565	50.5	82.8036	50.5	80.3892
	51.5	82.9387	51.5	88.5517	51.5	89.4868	51.5	87.3561	51.5	87.4644	51.5	85.4944	51.5	85.5954	51.5	83.2138	51.5	80.1696
	52.5	83.5339	52.5	87.0119	52.5	89.0869	52.5	86.3915	52.5	87.192	52.5	84.1461	52.5	85.633	52.5	83.0117	52.5	80.2832
	53.5	83.1794	53.5	88.6377	53.5	89.4161	53.5	88.2372	53.5	88.0588	53.5	85.2101	53.5	85.541	53.5	83.0004	53.5	80.6003
	54.5	83.3039	54.5	88.3511	54.5	89.5126	54.5	86.8481	54.5	88.0877	54.5	85.8556	54.5	85.3342	54.5	82.5537	54.5	80.1166
	55.5	83.9595	55.5	87.9464	55.5	88.1824	55.5	87.1082	55.5	87.612	55.5	86.1305	55.5	85.7413	55.5	82.4802	55.5	80.4894
	56.5	83.7754	56.5	88.3449	56.5	88.4901	56.5	86.7496	56.5	87.7472	56.5	86.0566	56.5	86.1998	56.5	82.1481	56.5	80.2471
	57.5	83.8528	57.5	87.5588	57.5	89.6526	57.5	87.0426	57.5	87.9586	57.5	85.1012	57.5	85.5505	57.5	81.8093	57.5	80.1559
	58.5	83.3758	58.5	87.9083	58.5	90.1821	58.5	87.1464	58.5	88.0835	58.5	86.4702	58.5	85.8955	58.5	82.1528	58.5	79.8938
	59.5	83.617	59.5	88.6763	59.5	89.0719	59.5	87.2739	59.5	87.688	59.5	85.1878	59.5	85.9887	59.5	82.7436	59.5	80.3701
	60.5	83.9314	60.5	88.7135	60.5	89.4029	60.5	86.7231	60.5	88.3769	60.5	85.2255	60.5	85.7058	60.5	81.5105	60.5	80.5097
	61.5	82.8113	61.5	87.5416	61.5	89.645	61.5	86.3971	61.5	87.2017	61.5	86.5572	61.5	85.6032	61.5	82.7583	61.5	80.6922
	62.5	83.5363	62.5	87.8324	62.5	89.9743	62.5	87.5049	62.5	88.2008	62.5	85.976	62.5	85.4577	62.5	83.5013	62.5	79.0941
	63.5	83.327	63.5	87.9932	63.5	89.6973	63.5	86.8922	63.5	87.8299	63.5	85.5485	63.5	85.7637	63.5	82.3503	63.5	80.6217
	64.5	84.4309	64.5	87.0644	64.5	89.5271	64.5	86.9291	64.5	88.0642	64.5	85.8332	64.5	86.1461	64.5	82.9173	64.5	80.0496
	65.5	83.3504	65.5	87.6857	65.5	89.1028	65.5	87.1326	65.5	87.9797	65.5	85.3313	65.5	85.7168	65.5	83.1024	65.5	79.8414
	66.5	82.1603	66.5	86.7494	66.5	89.414	66.5	86.9403	66.5	87.6539	66.5	84.7043	66.5	85.4026	66.5	82.1086	66.5	79.8064
	67.5	83.3748	67.5	89.0962	67.5	89.1392	67.5	87.3134	67.5	87.5359	67.5	84.6673	67.5	85.0365	67.5	82.6952	67.5	80.2985
	68.5	83.1484	68.5	88.699	68.5	88.9204	68.5	87.7848	68.5	88.5822	68.5	85.0656	68.5	86.2453	68.5	83.0032	68.5	80.0977
	69.5	83.2348	69.5	88.3099	69.5	88.7223	69.5	87.6205	69.5	88.4041	69.5	85.0372	69.5	86.502	69.5	81.9277	69.5	79.9124
	70.5	82.7231	70.5	88.4271	70.5	89.1863	70.5	87.4439	70.5	88.5656	70.5	85.4053	70.5	85.5094	70.5	82.7972	70.5	80.451
	71.5	82.7767	71.5	88.5479	71.5	88.4298	71.5	86.8297	71.5	88.875	71.5	85.4007	71.5	85.6684	71.5	82.3917	71.5	80.3631
	72.5	82.3497	72.5	87.8965	72.5	89.3637	72.5	86.2861	72.5	88.031	72.5	85.5317	72.5	85.7794	72.5	83.0903	72.5	79.8457
	73.5	83.8427	73.5	88.6342	73.5	89.5098	73.5	87.5962	73.5	88.0644	73.5	85.4888	73.5	87.6561	73.5	82.875	73.5	80.5384
	74.5	82.7949	74.5	88.5075	74.5	89.5277	74.5	88.0317	74.5	87.6677	74.5	83.7638	74.5	85.3082	74.5	83.2605	74.5	79.9067
	75.5	82.6201	75.5	88.2641	75.5	89.7561	75.5	87.1566	75.5	88.4985	75.5	85.0989	75.5	85.6892	75.5	83.1844	75.5	80.9338
	76.5	83.103	76.5	87.0318	76.5	89.9819	76.5	87.3618	76.5	88.2583	76.5	85.0216	76.5	86.7567	76.5	82.4616	76.5	80.749
	77.5	82.9537	77.5	89.2387	77.5	88.8935	77.5	87.0531	77.5	86.9937	77.5	84.4839	77.5	85.2355	77.5	82.3313	77.5	80.4136
	78.5	83.4088	78.5	88.2024	78.5	88.7379	78.5	86.7608	78.5	87.3155	78.5	85.4481	78.5	85.3255	78.5	82.5033	78.5	80.6104
	79.5	84.1599	79.5	88.3626	79.5	89.5864	79.5	87.4634	79.5	87.3951	79.5	85.2595	79.5	86.3203	79.5	82.2918	79.5	79.9903
	80.5	83.6559	80.5	87.0583	80.5	90.6739	80.5	87.8402	80.5	87.0124	80.5	85.7456	80.5	85.0978	80.5	82.6423	80.5	80.6329
	81.5	84.2151	81.5	88.0637	81.5	88.9312	81.5	86.1717	81.5	88.2768	81.5	85.7173	81.5	85.6911	81.5	82.8606	81.5	80.133
	82.5	83.7454	82.5	88.0681	82.5	88.7106	82.5	87.5413	82.5	88.0408	82.5	85.9214	82.5	85.5369	82.5	82.8687	82.5	79.8346
	83.5	84.273	83.5	88.7186	83.5	89.4169	83.5	86.1341	83.5	86.6	83.5	86.1545	83.5	85.738	83.5	81.9064	83.5	79.9852
	84.5	83.7779	84.5	87.734	84.5	89.3993	84.5	87.4379	84.5	88.0985	84.5	85.9087	84.5	85.7319	84.5	82.9238	84.5	79.9939
	85.5	82.7228	85.5	87.6381	85.5	89.0588	85.5	87.2058	85.5	87.3227	85.5	85.8557	85.5	86.2651	85.5	82.8314	85.5	79.3902
	86.5	83.4612	86.5	87.7653	86.5	88.8553	86.5	87.3384	86.5	88.4553	86.5	84.3721	86.5	85.6963	86.5	83.2447	86.5	80.4385
	87.5	83.5462	87.5	89.381	87.5	88.561	87.5	86.518	87.5	86.7989	87.5	84.8522	87.5	85.9053	87.5	82.0776	87.5	80.0346
	88.5	84.3447	88.5	88.2746	88.5	88.4219	88.5	87.0906	88.5	86.2871	88.5	85.1024	88.5	85.5597	88.5	82.3646	88.5	80.5655
	89.5	83.0252	89.5	88.707	89.5	89.1237	89.5	87.5131	89.5	87.9639	89.5	84.766	89.5	86.0508	89.5	83.1122	89.5	79.7994
	90.5	82.5598	90.5	87.1199	90.5	89.9763	90.5	87.3395	90.5	88.3536	90.5	85.1517	90.5	85.5823	90.5	82.2968	90.5	81.0961
	91.5	84.3107	91.5	88.4058	91.5	89.4827	91.5	86.9068	91.5	87.8294	91.5	84.579	91.5	84.8637	91.5	82.5019	91.5	80.7838
	92.5	82.8123	92.5	87.8259	92.5	89.6739	92.5	86.9567	92.5	87.6977	92.5	85.0983	92.5	85.8115	92.5	82.622	92.5	80.7499
	93.5	83.2377	93.5	88.3958	93.5	89.7203	93.5	86.4132	93.5	87.4476	93.5	84.5416	93.5	85.9394	93.5	82.2046	93.5	80.8016
	94.5	83.9243	94.5	88.7751	94.5	89.4126	94.5	87.4932	94.5	87.7148	94.5	84.938	94.5	86.0581	94.5	83.8093	94.5	80.4559
	95.5	83.5224	95.5	87.4289	95.5	88.3369	95.5	86.3675	95.5	88.5002	95.5	85.0556	95.5	85.6067	95.5	83.4168	95.5	79.7344
	96.5	83.0983	96.5	87.7724	96.5	89.2915	96.5	87.5482	96.5	86.9682	96.5	85.151	96.5	85.4296	96.5	82.5399	96.5	81.117
	97.5	84.7094	97.5	87.8064	97.5	89.0921	97.5	87.0785	97.5	88.3762	97.5	85.2271	97.5	85.3324	97.5	83.3762	97.5	80.0008
	98.5	84.3849	116.785	92.7502	98.5	89.3389	98.5	87.3877	98.5	87.3714	98.5	85.0414	98.5	85.8067	98.5	82.2071	98.5	80.5554
	99.5	83.1317	117.785	92.4305	99.5	89.004	99.5	87.8044	99.5	87.8921	99.5	84.8881	99.5	86.5924	99.5	83.4406	99.5	80.3834
	100.5	83.878	118.785	92.6519	100.5	89.2256	100.5	87.0925	100.5	88.4294	121.494	90.6693	100.5	85.6697	100.5	82.381	100.5	80.9206
	101.5	84.0001	119.785	93.4232	101.5	89.0727	101.5	87.4734	101.5	87.3124	122.494	91.1348	101.5	85.9172	101.5	83.09	101.5	80.0414
	102.5	83.3217	120.785	93.4633	102.5	88.5662	102.5	86.7128	102.5	88.0008	123.494	91.2009	102.5	85.9815	102.5	83.216	102.5	80.2334
	103.5	84.4519	121.785	93.4042	103.5	88.9036	103.5	86.9331	103.5	88.1007	124.494	92.1457	103.5	85.785	103.5	82.9462	103.5	80.4728
	104.5	84.0149	122.785	93.2512	104.5	88.784	104.5	87.8024	104.5	88.1382	125.494	90.7474	104.5	85.8304	104.5	82.993	104.5	80.2216
	105.5	83.8476	123.785	92.9875	105.5	89.4858	105.5	87.2943	105.5	87.426	126.494	91.0409	105.5	85.0639	105.5	83.4981	105.5	80.9139
	106.5	84.3363	124.785	93.2152	106.5	89.7378	106.5	87.8856	106.5	88.6435	127.494	91.1335	106.5	86.0818	106.5	83.0451	106.5	80.8088
	107.5	83.7209	125.785	93.276	107.5	89.2375	107.5	86.6909	107.5	88.1922	128.494	90.9504	107.5	86.1172	107.5	83.4772	107.5	80.1334
	108.5	82.99	126.785	92.2102	108.5	89.6809	108.5	87.5226	108.5	87.3547	129.494	90.8615	108.5	86.0892	108.5	82.9114	108.5	79.8801
	109.5	83.7439	127.785	92.474	109.5	90.3643	130.174	86.644	109.5	87.4115	130.494	90.3762	109.5	86.1471	109.5	83.7132	109.5	80.2807
	110.5	83.9929	128.785	93.9427	110.5	88.9342	131.174	88.5673	110.5	87.6912	131.494	89.3033	110.5	86.7605	110.5	82.8189	110.5	79.8193
	111.5	83.7982	129.785	93.8316	111.5	90.0831	132.174	88.4406	111.5	87.9703	132.494	90.7565	111.5	85.9746	111.5	83.2115	111.5	80.0722
	112.5	83.8115	130.785	93.8779	112.5	89.4777	133.174	88.669	112.5	86.8456	133.494	91.451	112.5	86.394	112.5	83.4551	112.5	80.6312
	113.5	84.3438	131.785	93.97	113.5	88.875	134.174	88.9067	113.5	88.2184	134.494	90.8868	113.5	85.8155	113.5	82.4039	113.5	80.8947
	114.5	84.1091	132.785	93.1749	114.5	89.9296	135.174	88.6287	114.5	88.127	135.494	90.5696	114.5	85.6146	114.5	82.7209	114.5	81.4124
	115.5	83.1077	133.785	94.5418	135.805	88.4382	136.174	88.0523	115.5	87.1139	136.494	90.9916	134.736	86.8191	115.5	83.8496	115.5	80.6482
	116.5	83.779	134.785	93.7049	136.805	90.3311	137.174	89.3386	116.5	86.9762	137.494	90.7606	135.736	88.5019	116.5	82.3908	116.5	80.011
	117.5	83.7096	135.785	93.7216	137.805	90.635	138.174	87.9056	117.5	87.2955	138.494	90.3931	136.736	86.5617	117.5	82.7649	117.5	79.8853
	118.5	83.8278	136.785	94.2948	138.805	90.4278	139.174	87.918	118.5	87.7284	139.494	91.2482	137.736	87.9473	118.5	82.8642	118.5	80.4031
	119.5	83.3651	137.785	94.7017	139.805	90.5158	140.174	88.339	119.5	88.8206	140.494	89.7517	138.736	87.9625	119.5	82.0319	119.5	79.963
	120.5	84.6468	138.785	93.1419	140.805	89.8461	141.174	89.2187	120.5	88.0965	141.494	91.0977	139.736	86.574	120.5	83.3619	120.5	80.073
	121.5	83.984	139.785	93.8791	141.805	90.2917	142.174	88.4092	121.5	87.1227	142.494	90.9046	140.736	87.6374	121.5	81.6693	121.5	79.9702
	122.5	83.6179	140.785	94.3964	142.805	90.7549	143.174	89.3767	122.5	88.3718	143.494	90.9653	141.736	87.7848	122.5	83.046	122.5	80.389
	123.5	83.1905	141.785	94.6123	143.805	91.1803	144.174	88.7424	123.5	87.5545	144.494	91.4603	142.736	88.4032	123.5	83.0318	123.5	80.5068
	124.5	82.5854	142.785	94.959	144.805	90.2653	145.174	89.0587	124.5	87.1909	145.494	89.8599	143.736	87.3338	124.5	82.7702	124.5	80.1116
	125.5	83.2686	143.785	94.7593	145.805	90.7411	146.174	88.4654	125.5	87.5052	146.494	90.7526	144.736	86.5504	125.5	83.3943	125.5	80.8375
	126.5	83.853	144.785	94.8045	146.805	91.1366	147.174	88.7026	126.5	88.0846	147.494	89.745	145.736	87.6624	126.5	83.6552	126.5	79.4006
	127.5	83.7249	145.785	94.7039	147.805	90.2366	148.174	89.9685	127.5	87.3975	148.494	90.4777	146.736	87.2936	127.5	83.6727	127.5	80.2877
	128.5	83.5088	146.785	94.7917	148.805	90.7785	149.174	89.3583	128.5	87.4656	149.494	89.96	147.736	87.8655	147.824	83.5163	128.5	80.5308
	129.5	84.0092	147.785	95.2952	149.805	90.3591	150.174	88.7809	129.5	87.9926	150.494	89.9078	148.736	87.5156	148.824	84.3262	129.5	79.8802
	130.5	83.6886	148.785	95.3392	150.805	90.5122	151.174	88.551	130.5	87.8796	151.494	89.9478	149.736	87.1968	149.824	84.7207	130.5	80.0493
	131.5	83.6013	149.785	95.7514	151.805	91.8472	152.174	88.9194	131.5	87.8364	152.494	90.3307	150.736	87.6857	150.824	85.2441	131.5	80.0613
	152.78	86.2183	150.785	93.9195	152.805	90.8357	153.174	89.238	132.5	87.3396	153.494	89.8459	151.736	87.543	151.824	84.3568	132.5	80.376
	153.78	86.1032	151.785	94.0804	153.805	90.9119	154.174	89.4492	133.5	87.5694	154.494	91.258	152.736	88.3366	152.824	84.524	133.5	79.9427
	154.78	86.5506	152.785	94.7653	154.805	90.6677	155.174	88.9603	134.5	87.735	155.494	90.7203	153.736	86.7636	153.824	84.2092	134.5	80.1307
	155.78	86.2987	153.785	95.0061	155.805	91.0885	156.174	89.8769	135.5	87.7262	156.494	89.7653	154.736	86.8756	154.824	83.2957	135.5	80.0962
	156.78	85.0869	154.785	95.7899	156.805	91.6275	157.174	90.336	136.5	87.5485	157.494	89.3573	155.736	87.447	155.824	83.6285	136.5	80.1693
	157.78	85.8408	155.785	94.3715	157.805	91.7688	158.174	90.1877	137.5	87.6404	158.494	90.304	156.736	87.0691	156.824	84.9225	137.5	79.9395
	158.78	85.7827	156.785	95.7129	158.805	91.0077	159.174	89.489	138.5	86.2194	159.494	90.4433	157.736	87.6137	157.824	84.6589	138.5	80.7806
	159.78	85.7104	157.785	95.8546	159.805	92.0511	160.174	90.0248	139.5	87.36	160.494	90.7674	158.736	88.1784	158.824	84.7049	139.5	79.5334
	160.78	86.6488	158.785	94.9979	160.805	92.3896	161.174	90.2789	161.71	88.2393	161.494	90.5396	159.736	88.3162	159.824	84.8697	140.5	80.1843
	161.78	85.7453	159.785	96.8055	161.805	91.6249	162.174	89.704	162.71	89.3379	162.494	89.9244	160.736	87.5945	160.824	84.9022	141.5	80.3094
	162.78	86.0512	160.785	96.2242	162.805	92.3168	163.174	89.5404	163.71	89.8063	163.494	89.9403	161.736	87.9676	161.824	84.3901	142.5	80.0608
	163.78	85.4825	161.785	95.437	163.805	92.3872	164.174	90.2118	164.71	89.6762	164.494	91.6872	162.736	88.7657	162.824	84.8413	143.5	80.771
	164.78	86.081	162.785	96.2293	164.805	91.3724	165.174	89.7593	165.71	88.6909	165.494	90.618	163.736	86.9312	163.824	84.4208	144.5	79.2791
	165.78	85.7736	163.785	95.3646	165.805	92.0199	166.174	89.4769	166.71	89.1203	166.494	90.5947	164.736	87.2106	164.824	84.1247	145.5	80.3208
	166.78	86.1396	164.785	96.0493	166.805	92.8304	167.174	90.4854	167.71	89.9657	167.494	91.2486	165.736	88.3249	165.824	84.521	146.5	79.5346
	167.78	87.4496	165.785	95.9594	167.805	90.9536	168.174	90.7364	168.71	88.8322	168.494	89.8729	166.736	86.9982	166.824	84.1271	147.5	78.7134
	168.78	86.7273	166.785	96.146	168.805	91.7371	169.174	90.1888	169.71	88.1318	169.494	91.8267	167.736	88.4307	167.824	83.9276	148.5	80.2467
	169.78	86.2078	167.785	96.7072	169.805	91.9088	170.174	90.1692	170.71	88.05	170.494	91.4622	168.736	88.1805	168.824	84.5342	149.5	79.6712
	170.78	87.388	168.785	97.0322	170.805	93.8608	171.174	89.858	171.71	88.6019	171.494	90.725	169.736	88.5926	169.824	83.9022	150.5	80.0968
	171.78	86.9442	169.785	95.9085	171.805	92.4858	172.174	90.0152	172.71	89.0852	172.494	91.2083	170.736	87.1805	170.824	84.6322	151.5	79.0776
	172.78	87.5669	170.785	96.1041	172.805	92.1866	173.174	90.816	173.71	88.6275	173.494	90.4912	171.736	88.1178	171.824	85.4626	152.5	79.9938
	173.78	87.0247	171.785	96.4546	173.805	92.9036	174.174	90.092	174.71	88.8921	174.494	90.2686	172.736	87.5773	172.824	84.4959	171.95	81.1399
	174.78	88.0909	172.785	96.5953	174.805	93.1005	175.174	90.4173	175.71	87.9485	175.494	90.9875	173.736	88.6937	173.824	85.2837	172.95	83.0111
	175.78	87.0445	173.785	97.2717	175.805	93.6526	176.174	89.7488	176.71	88.8889	176.494	89.8703	174.736	88.2021	174.824	85.2996	173.95	81.8695
	176.78	88.1453	174.785	97.2366	176.805	93.3325	177.174	91.8136	177.71	88.8257	177.494	90.2448	175.736	87.9481	175.824	85.0578	174.95	81.3835
	177.78	87.7613	175.785	97.2461	177.805	93.765	178.174	90.525	178.71	87.7779	178.494	90.5746	176.736	87.5326	176.824	85.3861	175.95	81.54
	178.78	88.0587	176.785	97.6061	178.805	93.1886	179.174	90.6569	179.71	88.6136	179.494	90.7688	177.736	88.2603	177.824	84.6279	176.95	81.779
	179.78	86.3624	177.785	97.0024	179.805	93.4493	180.174	90.3561	180.71	89.367	180.494	91.266	178.736	88.3975	178.824	85.2043	177.95	81.4017
	180.78	88.6498	178.785	96.7659	180.805	92.9773	181.174	90.352	181.71	89.2898	181.494	90.0849	179.736	87.4486	179.824	84.3783	178.95	81.9931
	181.78	88.6727	179.785	97.1428	181.805	92.5467	182.174	91.8702	182.71	88.3743	182.494	91.4374	180.736	88.5718	180.824	84.9029	179.95	80.7785
	182.78	88.4431	180.785	97.1219	182.805	93.3618	183.174	90.783	183.71	88.5342	183.494	90.4512	181.736	88.1215	181.824	84.6135	180.95	81.2342
	183.78	87.6694	181.785	97.82	183.805	93.2128	184.174	91.0882	184.71	89.7999	184.494	89.871	182.736	88.0542	182.824	85.0572	181.95	80.3191
	184.78	89.0636	182.785	98.2832	184.805	93.2194	185.174	91.2932	185.71	87.8216	185.494	90.4068	183.736	88.78	183.824	85.0308	182.95	80.573
	185.78	89.9215	183.785	97.3375	185.805	94.7394	186.174	91.5327	186.71	88.8452	186.494	90.0637	184.736	87.7116	184.824	85.611	183.95	80.3739
	186.78	88.571	184.785	98.36	186.805	93.9247	187.174	91.4155	187.71	88.6121	187.494	90.4406	185.736	88.1692	185.824	84.1811	184.95	80.1758
	187.78	88.1695	185.785	98.0311	187.805	93.6682	188.174	91.3688	188.71	88.2367	188.494	90.5988	186.736	88.1709	186.824	84.8865	185.95	81.1331
	188.78	88.9319	186.785	97.9902	188.805	95.2863	189.174	91.066	189.71	88.425	189.494	90.3424	187.736	87.0173	187.824	84.6524	186.95	81.0095
	189.78	89.551	187.785	98.0354	189.805	93.1833	190.174	91.961	190.71	87.6179	190.494	89.4784	188.736	87.8723	188.824	84.3076	187.95	80.2747
	190.78	88.8101	188.785	98.1839	190.805	93.6579	191.174	90.5331	191.71	88.9611	191.494	90.2353	189.736	87.9648	189.824	85.2183	188.95	80.3122
	191.78	89.5037	189.785	97.4977	191.805	93.3432	192.174	91.8437	192.71	88.4238	192.494	90.378	190.736	87.1066	190.824	85.3662	189.95	80.2685
	192.78	89.8835	190.785	98.0347	192.805	93.8577	193.174	91.5621	193.71	87.8141	193.494	90.3577	191.736	88.627	191.824	84.5904	190.95	80.1999
	193.78	90.1008	191.785	97.8421	193.805	93.5577	194.174	91.4182	194.71	88.3267	194.494	91.8576	192.736	88.3618	192.824	84.9733	191.95	80.231
	194.78	90.4657	192.785	98.9709	194.805	93.724	195.174	91.0532	195.71	89.1442	195.494	90.5323	193.736	87.4005	193.824	84.9567	192.95	80.6696
	195.78	90.4502	193.785	99.246	195.805	93.5025	196.174	91.1107	196.71	88.707	196.494	90.1075	194.736	87.3889	194.824	85.1906	193.95	80.2255
	196.78	90.4989	194.785	99.0229	196.805	93.7981	197.174	91.1155	197.71	89.417	197.494	90.8626	195.736	87.3112	195.824	84.1822	194.95	80.1396
	197.78	89.9596	195.785	99.4689	197.805	94.4597	198.174	92.3606	198.71	89.3303	198.494	90.0593	196.736	87.864	196.824	84.3331	195.95	80.959
	198.78	90.4126	196.785	98.6607	198.805	93.7979	199.174	91.1397	199.71	87.9566	199.494	90.0195	197.736	88.3534	197.824	85.1113	196.95	80.694
	199.78	90.589	197.785	100.064	199.805	93.9873	200.174	91.471	200.71	89.8811	200.494	91.2292	198.736	88.8805	198.824	84.7426	197.95	80.5379
	200.78	90.5119	198.785	98.3251	200.805	94.3322	201.174	91.1389	201.71	88.5417	201.494	91.1	199.736	87.7007	199.824	84.7349	198.95	80.7658
	201.78	91.0943	199.785	99.6466	201.805	94.1121	202.174	91.0864	202.71	88.7733	202.494	90.7579	200.736	87.4705	200.824	85.8799	199.95	79.6812
	202.78	91.0125	200.785	99.2538	202.805	94.8304	203.174	91.4087	203.71	89.1974	203.494	89.9122	201.736	89.0966	201.824	85.391	200.95	80.7695
	203.78	90.1178	201.785	99.1185	203.805	94.0201	204.174	91.313	204.71	89.8376	204.494	90.9882	202.736	89.0601	202.824	84.7767	201.95	80.3491
	204.78	90.7796	202.785	99.7044	204.805	94.4894	205.174	93.2073	205.71	88.5635	205.494	90.2833	203.736	88.7793	203.824	84.6693	202.95	79.9778
	205.78	91.3011	203.785	100.126	205.805	95.4076	206.174	91.5936	206.71	89.9934	206.494	90.3471	204.736	88.1963	204.824	85.7233	203.95	80.252
	206.78	91.2134	204.785	99.4589	206.805	95.6021	207.174	92.3198	207.71	89.0773	207.494	90.8303	205.736	87.7367	205.824	84.4449	204.95	80.2671
	207.78	90.8102	205.785	99.5251	207.805	95.4565	208.174	92.5961	208.71	89.1403	208.494	90.1713	206.736	87.9542	206.824	84.1755	205.95	80.6477
	208.78	92.4656	206.785	99.9747	208.805	94.1179	209.174	91.7635	209.71	88.8808	209.494	91.0278	207.736	87.4213	207.824	85.5546	206.95	80.6277
	209.78	91.8568	207.785	99.4263	209.805	95.7011	210.174	92.0685	210.71	88.3043	210.494	91.1717	208.736	88.1583	208.824	85.0947	207.95	80.0648
	210.78	91.9051	208.785	100.346	210.805	95.4461	211.174	92.5181	211.71	88.3193	211.494	91.3381	209.736	87.7954	209.824	84.9008	208.95	80.648
	211.78	92.0915	209.785	100.176	211.805	94.7419	212.174	92.739	212.71	89.3478	212.494	90.35	210.736	88.5589	210.824	85.298	209.95	80.679
	212.78	92.5948	210.785	100.285	212.805	96.2776	213.174	93.3271	213.71	88.8228	213.494	91.4738	211.736	87.923	211.824	85.019	210.95	80.5546
	213.78	92.9532	211.785	100.451	213.805	95.5986	214.174	93.4101	214.71	89.0272	214.494	90.9117	212.736	88.1724	212.824	85.6578	211.95	81.1496
	214.78	92.8614	212.785	101.012	214.805	95.5897	215.174	92.4039	215.71	88.8484	215.494	90.9204	213.736	87.8527	213.824	85.6633	212.95	80.6346
	215.78	92.7769	213.785	100.473	215.805	96.3336	216.174	93.2082	216.71	88.9407	216.494	90.1574	214.736	86.8897	214.824	85.0023	213.95	80.0847
	216.78	92.4208	214.785	100.38	216.805	95.6556	217.174	92.7347	217.71	89.2022	217.494	90.941	215.736	87.477	215.824	84.5641	214.95	80.7264
	217.78	92.8874	215.785	100.041	217.805	95.7545	218.174	92.8205	218.71	89.7952	218.494	91.7881	216.736	88.3179	216.824	85.4336	215.95	80.9463
	218.78	92.627	216.785	101.129	218.805	95.3293	219.174	92.6641	219.71	88.1917	219.494	91.2427	217.736	88.0456	217.824	85.0513	216.95	80.6238
	219.78	92.9378	217.785	101	219.805	96.1097	220.174	92.4829	220.71	89.3049	220.494	90.9986	218.736	88.2885	218.824	85.1517	217.95	81.079
	220.78	91.5164	218.785	100.421	220.805	96.3775	221.174	92.3848	221.71	89.082	221.494	90.4891	219.736	88.4049	219.824	83.8774	218.95	80.3553
	221.78	93.9702	219.785	100.233	221.805	96.4551	222.174	93.671	222.71	89.2753	222.494	90.9205	220.736	87.6155	220.824	85.219	219.95	80.7883
	222.78	94.2055	220.785	102.118	222.805	95.8594	223.174	93.1847	223.71	89.2487	223.494	90.683	221.736	88.5024	221.824	84.4167	220.95	79.6581
	223.78	93.7126	221.785	100.535	223.805	95.8047	224.174	92.8116	224.71	89.4691	224.494	91.6727	222.736	87.992	222.824	84.7748	221.95	80.5367
	224.78	94.2386	222.785	101.539	224.805	96.9925	225.174	92.8968	225.71	89.2879	225.494	92.0203	223.736	87.7079	223.824	85.2081	222.95	80.1414
	225.78	92.9636	223.785	101.291	225.805	95.9574	226.174	93.105	226.71	90.0957	226.494	90.5018	224.736	87.6668	224.824	84.3237	223.95	81.346
	226.78	93.2504	224.785	100.543	226.805	95.8968	227.174	93.3974	227.71	89.4558	227.494	90.3863	225.736	88.0722	225.824	84.1297	224.95	79.7977
	227.78	93.933	225.785	100.793	227.805	96.5671	228.174	93.5905	228.71	89.3397	228.494	90.6448	226.736	87.0347	226.824	84.2992	225.95	80.993
	228.78	94.2618	226.785	101.549	228.805	96.8814	229.174	93.3862	229.71	90.0567	229.494	91.2626	227.736	88.01	227.824	85.4925	226.95	80.3552
	229.78	94.3503	227.785	101.932	229.805	95.9684	230.174	92.4373	230.71	89.645	230.494	91.02	228.736	88.1324	228.824	85.0708	227.95	80.9449
	230.78	93.8479	228.785	101.79	230.805	97.7138	231.174	93.981	231.71	88.3741	231.494	91.6967	229.736	88.2225	229.824	85.1519	228.95	80.749
	231.78	94.3589	229.785	101.014	231.805	96.783	232.174	93.1449	232.71	89.5456	232.494	91.3787	230.736	88.4187	230.824	85.1925	229.95	80.7367
	232.78	93.2058	230.785	101.216	232.805	97.8833	233.174	93.1237	233.71	88.3678	233.494	91.2951	231.736	87.9031	231.824	85.852	230.95	81.0663
	233.78	94.206	231.785	103.375	233.805	96.4589	234.174	93.3028	234.71	89.9932	234.494	91.4188	232.736	87.6976	232.824	84.333	231.95	81.0307
	234.78	94.2057	232.785	102.66	234.805	97.8315	235.174	92.796	235.71	89.8044	235.494	91.0977	233.736	87.937	233.824	85.1011	232.95	80.2593
	235.78	94.7639	233.785	102.558	235.805	97.7733	236.174	93.5551	236.71	90.2978	236.494	91.5167	234.736	87.7369	234.824	84.8875	233.95	80.5854
	236.78	95.0341	234.785	101.621	236.805	97.0056	237.174	94.3675	237.71	89.6383	237.494	90.8614	235.736	87.3264	235.824	85.622	234.95	81.2382
	237.78	95.1161	235.785	102.404	237.805	96.7496	238.174	93.3877	238.71	89.6608	238.494	90.9461	236.736	87.9229	236.824	85.1184	235.95	79.8839
	238.78	95.286	236.785	102.497	238.805	97.3503	239.174	93.6239	239.71	90.6322	239.494	91.5934	237.736	88.1935	237.824	85.0904	236.95	80.7112
	239.78	95.3678	237.785	102.614	239.805	97.5106	240.174	94.3643	240.71	89.3527	240.494	91.6047	238.736	88.307	238.824	85.4637	237.95	79.4021
	240.78	95.1534	238.785	102.015	240.805	97.7519	241.174	93.2618	241.71	90.081	241.494	89.8397	239.736	87.2685	239.824	84.873	238.95	81.0923
	241.78	96.1089	239.785	101.904	241.805	97.3691	242.174	93.7838	242.71	89.568	242.494	91.4484	240.736	88.1765	240.824	84.0662	239.95	80.3734
	242.78	95.9674	240.785	103.662	242.805	97.6073	243.174	94.7929	243.71	90.0766	243.494	92.1515	241.736	87.9981	241.824	84.6294	240.95	79.78
	243.78	96.4068	241.785	103.324	243.805	97.3536	244.174	94.2868	244.71	90.5314	244.494	90.7376	242.736	88.1674	242.824	85.5516	241.95	80.3323
	244.78	97.1087	242.785	102.395	244.805	97.1873	245.174	94.5439	245.71	91.1048	245.494	90.7942	243.736	88.3004	243.824	84.7683	242.95	80.777
	245.78	95.3581	243.785	103.437	245.805	99.3193	246.174	93.5291	246.71	89.9006	246.494	90.6693	244.736	87.3078	244.824	84.7308	243.95	80.1783
	246.78	96.1915	244.785	102.253	246.805	97.7981	247.174	94.5423	247.71	89.8384	247.494	92.0668	245.736	87.9058	245.824	84.4957	244.95	80.8387
	247.78	97.0909	245.785	104.239	247.805	98.8484	248.174	94.6292	248.71	90.4212	248.494	91.3151	246.736	88.9001	246.824	85.6098	245.95	81.0602
	248.78	96.6243	246.785	103.541	248.805	98.0426	249.174	94.5223	249.71	89.7185	249.494	90.5114	247.736	88.3238	247.824	85.556	246.95	79.9302
	249.78	96.5964	247.785	103.839	249.805	98.1049	250.174	95.1588	250.71	90.5437	250.494	90.5736	248.736	88.4797	248.824	85.3499	247.95	80.4645
	250.78	96.8424	248.785	103.385	250.805	98.4916	251.174	95.121	251.71	90.5495	251.494	91.2728	249.736	87.6184	249.824	84.7664	248.95	80.4148
	251.78	96.2245	249.785	103.561	251.805	98.7542	252.174	93.9995	252.71	90.1036	252.494	91.6077	250.736	89.0412	250.824	85.3033	249.95	80.2552
	252.78	97.4746	250.785	103.166	252.805	98.2603	253.174	94.028	253.71	91.3188	253.494	91.7015	251.736	88.3091	251.824	85.2611	250.95	81.204
	253.78	96.6999	251.785	103.879	253.805	97.8204	254.174	95.8861	254.71	89.9764	254.494	90.6066	252.736	89.1407	252.824	85.2928	251.95	80.146
	254.78	96.7666	252.785	103.442	254.805	98.1747	255.174	95.1651	255.71	90.671	255.494	90.3393	253.736	88.6217	253.824	84.8017	252.95	79.6724
	255.78	96.9296	253.785	102.653	255.805	99.0246	256.174	94.1921	256.71	90.4311	256.494	91.3758	254.736	88.045	254.824	84.9999	253.95	80.5013
	256.78	97.6475	254.785	104.64	256.805	98.8034	257.174	94.3274	257.71	89.4846	257.494	91.9434	255.736	87.7687	255.824	85.839	254.95	80.7821
	257.78	97.6296	255.785	104.575	257.805	98.5549	258.174	94.7572	258.71	88.9752	258.494	91.4603	256.736	87.8909	256.824	84.8264	255.95	80.6842
	258.78	97.1988	256.785	105.419	258.805	98.6491	259.174	95.1483	259.71	90.7705	259.494	91.0099	257.736	87.7814	257.824	86.0484	256.95	80.6936
	259.78	97.0609	257.785	104.309	259.805	99.6823	260.174	95.2002	260.71	90.8324	260.494	91.4271	258.736	88.0401	258.824	84.6882	257.95	81.4968
	260.78	97.4247	258.785	105.241	260.805	99.3554	261.174	96.0254	261.71	90.1259	261.494	91.5956	259.736	87.3528	259.824	84.9316	258.95	79.937
	261.78	97.8368	259.785	104.609	261.805	98.3531	262.174	95.3703	262.71	91.3118	262.494	91.5387	260.736	88.3668	260.824	84.8368	259.95	79.8663
	262.78	98.2596	260.785	104.465	262.805	97.9567	263.174	97.028	263.71	90.58	263.494	91.105	261.736	88.3029	261.824	84.8695	260.95	80.8599
	263.78	97.4222	261.785	104.515	263.805	99.0319	264.174	96.3536	264.71	90.8525	264.494	91.1775	262.736	88.4149	262.824	85.9044	261.95	80.8911
	264.78	97.6543	262.785	104.048	264.805	99.2551	265.174	95.5572	265.71	90.947	265.494	90.2085	263.736	87.5089	263.824	85.3272	262.95	80.6777
	265.78	98.481	263.785	104.525	265.805	99.5593	266.174	95.6351	266.71	91.101	266.494	91.2368	264.736	87.3193	264.824	85.2379	263.95	80.305
	266.78	98.8404	264.785	104.618	266.805	98.241	267.174	96.6161	267.71	90.4421	267.494	92.1297	265.736	88.5007	265.824	85.9249	264.95	81.4081
	267.78	98.475	265.785	103.923	267.805	99.7165	268.174	94.573	268.71	90.4571	268.494	91.6079	266.736	87.9826	266.824	85.0754	265.95	80.2578
	268.78	99.2803	266.785	105.533	268.805	99.0499	269.174	95.7492	269.71	91.4577	269.494	92.1581	267.736	87.4008	267.824	85.3885	266.95	80.3471
	269.78	99.2201	267.785	104.839	269.805	100.251	270.174	96.1464	270.71	90.9237	270.494	91.3395	268.736	88.4602	268.824	85.063	267.95	81.0145
	270.78	98.9035	268.785	105.079	270.805	99.8669	271.174	95.1535	271.71	90.8254	271.494	90.9567	269.736	88.4233	269.824	85.0704	268.95	80.3238
	271.78	100.109	269.785	104.203	271.805	99.7192	272.174	96.4366	272.71	90.4958	272.494	91.3073	270.736	87.4842	270.824	85.1145	269.95	80.6443
	272.78	98.5279	270.785	104.813	272.805	99.4445	273.174	96.023	273.71	90.4151	273.494	91.7896	271.736	88.1435	271.824	84.8365	270.95	80.9677
	273.78	99.1303	271.785	105.165	273.805	100.311	274.174	96.0961	274.71	91.0388	274.494	91.3047	272.736	88.2705	272.824	85.8472	271.95	81.3973
	274.78	100.865	272.785	104.928	274.805	99.0779	275.174	95.969	275.71	91.1003	275.494	91.5028	273.736	88.2024	273.824	84.4768	272.95	81.0881
	275.78	99.7206	273.785	106.604	275.805	100.502	276.174	95.4007	276.71	89.9974	276.494	91.9473	274.736	89.1221	274.824	85.2452	273.95	80.786
	276.78	100.605	274.785	106.174	276.805	99.9197	277.174	96.1948	277.71	91.0012	277.494	91.0552	275.736	86.7407	275.824	85.0689	274.95	81.9538
	277.78	100.014	275.785	105.601	277.805	99.4822	278.174	96.2821	278.71	90.909	278.494	90.7373	276.736	88.8762	276.824	84.6418	275.95	80.4347
	278.78	99.3749	276.785	107.78	278.805	100.007	279.174	96.4357	279.71	91.1683	279.494	91.6266	277.736	87.9448	277.824	84.3596	276.95	80.0742
	279.78	99.4876	277.785	105.53	279.805	99.7604	280.174	95.7996	280.71	90.5447	280.494	91.4322	278.736	88.4543	278.824	85.7193	277.95	80.203
	280.78	100.474	278.785	105.492	280.805	100.026	281.174	95.6161	281.71	90.706	281.494	91.343	279.736	87.6621	279.824	85.3658	278.95	79.9068
	281.78	100.125	279.785	105.486	281.805	99.8055	282.174	96.728	282.71	90.8745	282.494	91.5528	280.736	87.7439	280.824	84.8305	279.95	80.204
	282.78	100.442	280.785	106.396	282.805	99.6868	283.174	96.3408	283.71	89.8426	283.494	90.1686	281.736	88.9605	281.824	85.8043	280.95	80.1808
	283.78	101.349	281.785	106.917	283.805	100.449	284.174	95.5526	284.71	91.4763	284.494	91.4993	282.736	87.6589	282.824	85.8806	281.95	80.156
	284.78	101.191	282.785	106.907	284.805	99.8225	285.174	96.2842	285.71	90.965	285.494	91.3131	283.736	87.908	283.824	85.6454	282.95	80.0984
	285.78	101.135	283.785	106.615	285.805	100.798	286.174	97.4847	286.71	91.1231	286.494	92.0318	284.736	87.9912	284.824	85.0138	283.95	80.6087
	286.78	101.778	284.785	106.151	286.805	100.947	287.174	97.5293	287.71	91.0038	287.494	91.5582	285.736	88.2591	285.824	85.2618	284.95	80.8804
	287.78	102.103	285.785	106.848	287.805	100.268	288.174	97.3285	288.71	91.3183	288.494	91.5787	286.736	87.152	286.824	85.3561	285.95	80.9274
	288.78	101.732	286.785	106.653	288.805	100.53	289.174	96.3704	289.71	91.7829	289.494	91.9125	287.736	87.7048	287.824	85.2786	286.95	80.911
	289.78	102.158	287.785	106.649	289.805	100.574	290.174	95.9878	290.71	91.1216	290.494	91.7393	288.736	88.378	288.824	85.6527	287.95	81.5272
	290.78	101.046	288.785	107.168	290.805	100.955	291.174	97.3519	291.71	90.7515	291.494	91.4783	289.736	88.663	289.824	85.7118	288.95	80.1062
	291.78	103.334	289.785	106.457	291.805	101.04	292.174	97.0059	292.71	90.4223	292.494	91.209	290.736	88.046	290.824	86.2406	289.95	80.2703
	292.78	102.728	290.785	107.085	292.805	101.158	293.174	97.2256	293.71	91.0901	293.494	91.5908	291.736	88.9926	291.824	85.2094	290.95	81.02
	293.78	101.692	291.785	106.511	293.805	101.701	294.174	97.867	294.71	90.4873	294.494	91.2728	292.736	88.2675	292.824	85.4974	291.95	81.845
	294.78	102.407	292.785	106.694	294.805	100.806	295.174	96.8033	295.71	91.5367	295.494	90.6641	293.736	88.2428	293.824	85.5845	292.95	81.6893
	295.78	102.161	293.785	106.285	295.805	101.08	296.174	97.7844	296.71	91.066	296.494	91.2154	294.736	87.2587	294.824	85.4674	293.95	81.0859
	296.78	102.592	294.785	107.349	296.805	100.488	297.174	97.2434	297.71	91.2038	297.494	91.4422	295.736	88.4977	295.824	84.8683	294.95	81.9291
	297.78	102.5	295.785	106.305	297.805	101.925	298.174	97.2507	298.71	91.2151	298.494	91.5124	296.736	88.1817	296.824	85.4452	295.95	80.9495
	298.78	102.732	296.785	108.306	298.805	101.175	299.174	96.7127	299.71	92.1355	299.494	90.7162	297.736	88.3685	297.824	85.6789	296.95	80.4797
	299.78	102.697	297.785	107.597	299.805	101.376	300.174	96.7878	300.71	90.3129	300.494	91.6814	298.736	87.8807	298.824	86.1268	297.95	80.2003
	300.78	102.925	298.785	107.397	300.805	101.385	301.174	96.7836	301.71	91.7909	301.494	92.4107	299.736	87.9896	299.824	85.4224	298.95	80.7385
	301.78	102.441	299.785	107.998	301.805	102.123	302.174	98.0336	302.71	91.4024	302.494	90.9922	300.736	88.4824	300.824	84.5884	299.95	80.5312
	302.78	103.614	300.785	108.096	302.805	100.719	303.174	97.2124	303.71	91.0344	303.494	91.6921	301.736	88.9164	301.824	84.3974	300.95	81.7916
	303.78	104.027	301.785	107.293	303.805	101.467	304.174	96.8227	304.71	91.071	304.494	91.5912	302.736	87.8651	302.824	85.6672	301.95	79.7989
	304.78	103.287	302.785	107.779	304.805	101.872	305.174	97.4316	305.71	92.0514	305.494	91.5425	303.736	87.9555	303.824	85.8013	302.95	80.8527
	305.78	102.982	303.785	107.427	305.805	101.665	306.174	98.4114	306.71	91.5828	306.494	91.5861	304.736	88.9986	304.824	85.6678	303.95	80.9054
	306.78	102.17	304.785	108.115	306.805	101.416	307.174	97.0178	307.71	91.4564	307.494	91.1536	305.736	87.543	305.824	85.6689	304.95	80.9709
	307.78	103.68	305.785	109.277	307.805	102.12	308.174	98.0797	308.71	91.2768	308.494	91.2885	306.736	88.1737	306.824	84.8761	305.95	79.9874
	308.78	104.252	306.785	108.021	308.805	102.075	309.174	98.2102	309.71	91.8787	309.494	89.8995	307.736	88.3561	307.824	86.0212	306.95	80.833
	309.78	103.275	307.785	107.502	309.805	100.914	310.174	97.2989	310.71	91.9837	310.494	92.0021	308.736	87.5922	308.824	86.0679	307.95	80.8045
	310.78	103.771	308.785	108.767	310.805	102.146	311.174	98.5993	311.71	91.8208	311.494	91.9644	309.736	87.6322	309.824	84.8285	308.95	81.5367
	311.78	103.821	309.785	107.795	311.805	102.758	312.174	97.6895	312.71	91.6947	312.494	91.3872	310.736	87.9511	310.824	85.0986	309.95	81.1101
	312.78	103.556	310.785	108.325	312.805	102.471	313.174	96.7737	313.71	92.5349	313.494	91.1535	311.736	86.9651	311.824	84.964	310.95	81.2905
	313.78	103.131	311.785	108.959	313.805	102.535	314.174	97.792	314.71	92.2104	314.494	90.9524	312.736	87.9998	312.824	85.9719	311.95	80.3567
	314.78	103.987	312.785	108.174	314.805	102.957	315.174	97.4704	315.71	91.6002	315.494	90.8799	313.736	87.6848	313.824	84.9081	312.95	81.12
	315.78	103.988	313.785	108.165	315.805	102.001	316.174	96.9052	316.71	92.2196	316.494	90.5429	314.736	88.3338	314.824	85.7356	313.95	79.9212
	316.78	104.427	314.785	108.815	316.805	102.548	317.174	96.7741	317.71	91.4061	317.494	91.5226	315.736	88.9732	315.824	85.8028	314.95	81.4654
	317.78	104.496	315.785	109.1	317.805	102.729	318.174	97.5445	318.71	91.9675	318.494	91.9249	316.736	87.9076	316.824	85.3121	315.95	80.5079
	318.78	105.149	316.785	108.496	318.805	102.68	319.174	98.5928	319.71	91.759	319.494	91.612	317.736	88.0854	317.824	86.211	316.95	81.8205
	319.78	104.786	317.785	108.286	319.805	102.7	320.174	97.8901	320.71	91.8638	320.494	92.0575	318.736	87.9907	318.824	85.7935	317.95	81.637
	320.78	104.776	318.785	109.001	320.805	102.704	321.174	97.918	321.71	92.0388	321.494	91.847	319.736	88.6514	319.824	85.7693	318.95	80.8969
	321.78	104.786	319.785	108.784	321.805	103.58	322.174	96.7046	322.71	91.9199	322.494	91.7421	320.736	88.5039	320.824	85.7339	319.95	80.9795
	322.78	105.615	320.785	109.314	322.805	103.14	323.174	97.6432	323.71	90.8728	323.494	90.8842	321.736	88.5714	321.824	85.4929	320.95	81.5703
	323.78	104.171	321.785	109.791	323.805	103.813	324.174	98.4244	324.71	90.7008	324.494	92.2263	322.736	88.8945	322.824	85.1224	321.95	80.6305
	324.78	104.43	322.785	109.734	324.805	103.829	325.174	98.44	325.71	91.4853	325.494	90.941	323.736	89.8083	323.824	85.6556	322.95	81.2555
	325.78	104.799	323.785	109.312	325.805	103.401	326.174	97.771	326.71	90.9413	326.494	91.8693	324.736	88.8144	324.824	86.6207	323.95	80.332
	326.78	104.695	324.785	108.687	326.805	103.485	327.174	98.284	327.71	91.6572	327.494	91.2186	325.736	88.2804	325.824	86.3412	324.95	82.2611
	327.78	105.362	325.785	108.984	327.805	103.992	328.174	97.9745	328.71	92.0194	328.494	91.2597	326.736	87.8513	326.824	85.8731	325.95	80.3234
	328.78	106.235	326.785	108.968	328.805	103.206	329.174	98.4762	329.71	92.5412	329.494	91.3196	327.736	88.5824	327.824	86.5054	326.95	80.4845
	329.78	105.77	327.785	108.553	329.805	103.89	330.174	98.3	330.71	91.688	330.494	92.2404	328.736	88.2973	328.824	85.507	327.95	81.0629
	330.78	105.343	328.785	109.841	330.805	103.077	331.174	98.9509	331.71	91.949	331.494	90.5616	329.736	88.6539	329.824	85.6911	328.95	80.6173
	331.78	106.117	329.785	109.442	331.805	103.165	332.174	99.686	332.71	92.6465	332.494	91.1426	330.736	88.0805	330.824	86.5132	329.95	81.044
	332.78	106.471	330.785	109.575	332.805	104.194	333.174	98.8127	333.71	91.657	333.494	91.1975	331.736	88.6137	331.824	85.5881	330.95	81.1742
	333.78	106.55	331.785	110.111	333.805	104.476	334.174	98.1731	334.71	91.9073	334.494	92.3764	332.736	87.8038	332.824	85.2781	331.95	80.4796
	334.78	104.973	332.785	108.698	334.805	103.014	335.174	99.1599	335.71	91.7389	335.494	91.8335	333.736	87.3538	333.824	84.8012	332.95	81.06
	335.78	106.869	333.785	108.862	335.805	103.596	336.174	98.7934	336.71	91.9665	336.494	90.9761	334.736	87.5914	334.824	86.4272	333.95	81.2224
	336.78	105.792	334.785	110.082	336.805	104.624	337.174	99.0456	337.71	91.7619	337.494	92.1645	335.736	88.4969	335.824	86.1546	334.95	80.219
	337.78	105.676	335.785	108.996	337.805	104.658	338.174	98.5168	338.71	91.2165	338.494	91.692	336.736	88.2947	336.824	85.5469	335.95	81.2937
	338.78	107.074	336.785	109.279	338.805	104.207	339.174	99.3741	339.71	92.4414	339.494	91.4944	337.736	87.6152	337.824	85.2985	336.95	80.7237
	339.78	106.234	337.785	110.379	339.805	103.973	340.174	98.9215	340.71	90.9537	340.494	91.0939	338.736	89.1312	338.824	85.7211	337.95	81.328
	340.78	106.383	338.785	108.971	340.805	103.326	341.174	99.5094	341.71	91.654	341.494	92.5942	339.736	88.1888	339.824	85.7143	338.95	81.3891
	341.78	106.353	339.785	110.011	341.805	103.862	342.174	99.2718	342.71	92.0527	342.494	92.0177	340.736	88.6698	340.824	85.393	339.95	81.5625
	342.78	107.008	340.785	109.423	342.805	104.871	343.174	99.0652	343.71	91.8701	343.494	91.5803	341.736	87.2932	341.824	86.1963	340.95	81.3736
	343.78	106.808	341.785	109.317	343.805	103.918	344.174	99.0801	344.71	92.5425	344.494	92.1106	342.736	88.3573	342.824	85.2657	341.95	81.1938
	344.78	107.415	342.785	110.948	344.805	103.972	345.174	98.8694	345.71	92.0593	345.494	91.1926	343.736	87.3981	343.824	85.8215	342.95	80.1583
	345.78	107.184	343.785	110.897	345.805	104.355	346.174	99.4819	346.71	92.099	346.494	92.211	344.736	88.8092	344.824	86.0996	343.95	80.6492
	346.78	108.037	344.785	110.55	346.805	104.489	347.174	99.1959	347.71	92.7195	347.494	92.0888	345.736	88.2253	345.824	85.6844	344.95	80.3804
	347.78	106.213	345.785	109.858	347.805	104.832	348.174	99.2638	348.71	92.4396	348.494	91.4622	346.736	89.4783	346.824	85.7584	345.95	80.6359
	348.78	107.083	346.785	110.44	348.805	105.121	349.174	99.3348	349.71	91.695	349.494	92.2455	347.736	88.0017	347.824	85.8949	346.95	81.2763
	349.78	107.293	347.785	111.26	349.805	105.484	350.174	99.1711	350.71	92.42	350.494	92.3592	348.736	88.7911	348.824	85.6125	347.95	80.5516
	350.78	107.695	348.785	110.641	350.805	104.501	351.174	99.4499	351.71	92.1087	351.494	91.8794	349.736	87.9878	349.824	86.2699	348.95	80.4332
	351.78	107.311	349.785	111.106	351.805	104.918	352.174	99.7418	352.71	92.683	352.494	92.3022	350.736	88.4789	350.824	85.5644	349.95	81.1278
	352.78	107.722	350.785	110.278	352.805	105.208	353.174	99.1055	353.71	92.4746	353.494	90.9465	351.736	87.9151	351.824	86.0149	350.95	80.8705
	353.78	108.536	351.785	111.375	353.805	105.812	354.174	98.8089	354.71	93.0816	354.494	91.9897	352.736	88.9209	352.824	85.6236	351.95	80.8056
	354.78	107.832	352.785	111.366	354.805	104.748	355.174	99.1668	355.71	93.8563	355.494	91.8907	353.736	88.2084	353.824	85.3898	352.95	80.937
	355.78	108.04	353.785	110.846	355.805	105.269	356.174	100.152	356.71	92.9663	356.494	91.6592	354.736	88.8425	354.824	85.9463	353.95	80.3505
	356.78	107.371	354.785	110.456	356.805	106.718	357.174	100.312	357.71	92.8786	357.494	90.845	355.736	89.1333	355.824	85.3991	354.95	81.9267
	357.78	108.32	355.785	111.471	357.805	104.715	358.174	100.226	358.71	92.4178	358.494	91.6008	356.736	89.1013	356.824	86.6391	355.95	80.4299
	358.78	107.475	356.785	111.436	358.805	105.217	359.174	99.7806	359.71	92.8762	359.494	91.6095	357.736	88.5003	357.824	85.4006	356.95	81.1617
	359.78	108.053	357.785	111.023	359.805	105.104	360.174	99.7222	360.71	93.3502	360.494	92.3304	358.736	88.0956	358.824	86.2785	357.95	80.4081
	360.78	108.318	358.785	112.107	360.805	105.492	361.174	99.9932	361.71	92.4144	361.494	91.3855	359.736	88.2416	359.824	85.3141	358.95	80.7546
	361.78	108.969	359.785	110.475	361.805	105.424	362.174	99.5954	362.71	92.081	362.494	91.443	360.736	89.5599	360.824	85.6999	359.95	80.271
	362.78	107.954	360.785	112.028	362.805	105.5	363.174	99.447	363.71	92.2513	363.494	91.4776	361.736	87.5032	361.824	86.0017	360.95	80.8718
	363.78	108.479	361.785	111.511	363.805	106.194	364.174	100.724	364.71	92.2868	364.494	91.631	362.736	88.2044	362.824	85.2873	361.95	81.803
	364.78	108.312	362.785	111.583	364.805	106.158	365.174	100.33	365.71	93.2183	365.494	92.0408	363.736	90.1296	363.824	85.1585	362.95	80.3012
	365.78	108.876	363.785	111.338	365.805	106.107	366.174	100.45	366.71	92.3501	366.494	91.6212	364.736	89.1536	364.824	86.7373	363.95	81.7007
	366.78	109.182	364.785	111.59	366.805	105.197	367.174	99.5472	367.71	92.3297	367.494	92.1868	365.736	88.0553	365.824	86.1248	364.95	81.0137
	367.78	108.969	365.785	111.116	367.805	106.842	368.174	100.151	368.71	92.8971	368.494	90.7895	366.736	89.0077	366.824	85.7381	365.95	80.564
	368.78	109.593	366.785	111.43	368.805	106.048	369.174	99.1845	369.71	92.1063	369.494	90.832	367.736	87.7563	367.824	86.1373	366.95	80.7506
	369.78	109.648	367.785	110.228	369.805	106.046	370.174	100.014	370.71	93.2814	370.494	91.7066	368.736	87.2236	368.824	85.849	367.95	81.2278
	370.78	109.44	368.785	112.206	370.805	105.904	371.174	99.8773	371.71	93.1316	371.494	92.407	369.736	88.8775	369.824	85.7735	368.95	80.3575
	371.78	110.6	369.785	111.228	371.805	105.574	372.174	100.605	372.71	92.7351	372.494	91.5646	370.736	88.0304	370.824	85.9829	369.95	80.8157
	372.78	108.603	370.785	111.606	372.805	105.634	373.174	100.175	373.71	91.9979	373.494	91.9736	371.736	89.1645	371.824	85.7864	370.95	80.1861
	373.78	109.478	371.785	111.124	373.805	106.443	374.174	101.069	374.71	93.187	374.494	92.0105	372.736	88.3902	372.824	87.0978	371.95	81.1448
	374.78	109.828	372.785	111.874	374.805	106.057	375.174	100.129	375.71	93.8297	375.494	90.7768	373.736	87.5003	373.824	85.3512	372.95	80.7195
	375.78	110.778	373.785	111.507	375.805	105.605	376.174	99.8873	376.71	92.5264	376.494	91.6102	374.736	88.5046	374.824	85.3368	373.95	80.7224
	376.78	109.619	374.785	112.365	376.805	105.143	377.174	100.514	377.71	92.6981	377.494	92.2029	375.736	88.2775	375.824	84.528	374.95	80.2811
	377.78	109.587	375.785	112.535	377.805	107.224	378.174	101.074	378.71	93.1333	378.494	91.6126	376.736	88.3555	376.824	85.8407	375.95	81.6965
	378.78	110.305	376.785	112.165	378.805	106.385	379.174	100.928	379.71	93.4118	379.494	92.1596	377.736	88.4153	377.824	85.9766	376.95	80.8538
	379.78	110.547	377.785	112.678	379.805	104.957	380.174	100.88	380.71	92.7125	380.494	91.7755	378.736	88.7557	378.824	84.7965	377.95	80.8471
	380.78	110.216	378.785	112.228	380.805	106.482	381.174	100.973	381.71	93.7198	381.494	92.9282	379.736	88.5638	379.824	85.5403	378.95	81.109
	381.78	110.646	379.785	112.937	381.805	105.88	382.174	102.001	382.71	93.2091	382.494	91.9765	380.736	87.7818	380.824	85.064	379.95	80.9875
	382.78	110.251	380.785	113.854	382.805	107.561	383.174	100.162	383.71	93.1783	383.494	92.1355	381.736	88.7067	381.824	86.5732	380.95	81.8033
	383.78	110.358	381.785	112.503	383.805	106.484	384.174	100.876	384.71	93.7678	384.494	91.3619	382.736	88.3297	382.824	85.639	381.95	80.8382
	384.78	111.115	382.785	112.529	384.805	106.846	385.174	100.968	385.71	94.0574	385.494	92.0206	383.736	88.6551	383.824	85.373	382.95	80.4847
	385.78	110.968	383.785	113.543	385.805	107.063	386.174	100.776	386.71	92.299	386.494	92.8519	384.736	89.0731	384.824	86.108	383.95	80.2783
	386.78	111.964	384.785	114.309	386.805	106.104	387.174	100.957	387.71	92.9603	387.494	91.746	385.736	88.9559	385.824	86.267	384.95	79.7468
	387.78	111.192	385.785	112.966	387.805	108.097	388.174	100.711	388.71	93.3899	388.494	90.8351	386.736	89.2599	386.824	85.7763	385.95	81.2398
	388.78	111.405	386.785	114.417	388.805	107.205	389.174	101.055	389.71	93.6029	389.494	92.9159	387.736	88.8689	387.824	85.5117	386.95	80.0671
	389.78	111.707	387.785	113.07	389.805	106.802	390.174	101.838	390.71	94.3062	390.494	91.3321	388.736	88.7108	388.824	85.932	387.95	80.1038
	390.78	110.552	388.785	113.626	390.805	106.636	391.174	101.583	391.71	92.5404	391.494	91.4615	389.736	88.0164	389.824	85.3066	388.95	80.7235
	391.78	112.719	389.785	113.63	391.805	108.003	392.174	100.223	392.71	93.4409	392.494	92.4237	390.736	87.3189	390.824	85.5763	389.95	80.5582
	392.78	110.811	390.785	112.829	392.805	107.381	393.174	101.734	393.71	93.7452	393.494	91.8368	391.736	88.8204	391.824	85.6719	390.95	80.5597
	393.78	111.276	391.785	113.032	393.805	108.338	394.174	101.741	394.71	91.9333	394.494	92.4467	392.736	88.7276	392.824	86.4843	391.95	81.4989
	394.78	110.482	392.785	113.831	394.805	108.963	395.174	101.3	395.71	93.1023	395.494	92.2904	393.736	88.1115	393.824	85.8914	392.95	80.6437
	395.78	111.636	393.785	113.821	395.805	107.064	396.174	102.011	396.71	93.9239	396.494	93.1215	394.736	88.1798	394.824	85.7422	393.95	81.7123
	396.78	112.626	394.785	113.09	396.805	107.832	397.174	100.592	397.71	93.879	397.494	92.383	395.736	88.7148	395.824	86.4372	394.95	81.2506
	397.78	111.762	395.785	113.552	397.805	107.296	398.174	101.272	398.71	93.3158	398.494	93.5084	396.736	87.9235	396.824	86.3489	395.95	80.6013
	398.78	113.369	396.785	114.109	398.805	108.701	399.174	101.839	399.71	93.6617	399.494	91.7506	397.736	88.7774	397.824	85.8753	396.95	81.0892
	399.78	113.419	397.785	113.196	399.805	107.654	400.174	101.967	400.71	93.3477	400.494	91.4921	398.736	88.9857	398.824	85.6633	397.95	81.2212
	400.78	112.623	398.785	113.675	400.805	107.799	401.174	101.854	401.71	92.8878	401.494	91.3111	399.736	88.037	399.824	85.5403	398.95	79.707
	401.78	111.558	399.785	114.627	401.805	109.583	402.174	101.836	402.71	93.3056	402.494	91.9265	400.736	88.731	400.824	86.4586	399.95	80.0432
	402.78	112.422	400.785	114.113	402.805	108.064	403.174	102.328	403.71	94.3044	403.494	92.5474	401.736	88.7863	401.824	85.8671	400.95	80.883
	403.78	111.98	401.785	114.922	403.805	107.935	404.174	101.649	404.71	93.6502	404.494	92.986	402.736	88.7679	402.824	85.3577	401.95	81.4074
	404.78	112.682	402.785	114.603	404.805	108.908	405.174	101.519	405.71	94.3147	405.494	90.4062	403.736	87.9064	403.824	85.3993	402.95	81.4525
	405.78	112.007	403.785	114.06	405.805	108.534	406.174	101.886	406.71	93.4516	406.494	91.6658	404.736	88.1568	404.824	86.0461	403.95	81.158
	406.78	112.807	404.785	115.411	406.805	109.663	407.174	100.986	407.71	93.6992	407.494	92.1415	405.736	88.1075	405.824	86.0198	404.95	80.9354
	407.78	114.003	405.785	114.168	407.805	108.297	408.174	101.882	408.71	93.0093	408.494	91.7397	406.736	88.308	406.824	85.6541	405.95	80.6541
	408.78	112.58	406.785	114.249	408.805	107.932	409.174	102.512	409.71	92.9835	409.494	91.7869	407.736	89.2635	407.824	85.6598	406.95	80.4282
	409.78	113.327	407.785	114.586	409.805	107.209	410.174	102.556	410.71	93.331	410.494	92.8947	408.736	88.3851	408.824	85.2421	407.95	80.7446
	410.78	112.4	408.785	115.153	410.805	107.998	411.174	101.189	411.71	93.3638	411.494	91.2216	409.736	89.3512	409.824	85.3846	408.95	80.9821
	411.78	113.272	409.785	115.328	411.805	107.688	412.174	101.262	412.71	93.8708	412.494	92.1072	410.736	88.7003	410.824	84.7885	409.95	81.2638
	412.78	113.886	410.785	115.464	412.805	108.212	413.174	102.303	413.71	93.5882	413.494	92.5553	411.736	88.495	411.824	86.4503	410.95	80.7071
	413.78	113.423	411.785	115.15	413.805	108.699	414.174	101.788	414.71	92.7655	414.494	91.2505	412.736	88.0549	412.824	85.5446	411.95	80.4128
	414.78	113.019	412.785	115.524	414.805	107.474	415.174	102.1	415.71	93.7531	415.494	92.2502	413.736	87.6005	413.824	86.0642	412.95	81.1947
	415.78	114.188	413.785	115.746	415.805	108.17	416.174	101.987	416.71	94.3162	416.494	93.0212	414.736	88.3214	414.824	85.7019	413.95	81.0761
	416.78	113.249	414.785	115.297	416.805	108.415	417.174	101.798	417.71	92.9879	417.494	92.4375	415.736	88.6644	415.824	85.4112	414.95	80.986
	417.78	114.697	415.785	115.62	417.805	109.234	418.174	103.698	418.71	93.5176	418.494	91.7752	416.736	89.2765	416.824	85.9648	415.95	80.2479
	418.78	113.835	416.785	115.432	418.805	109.172	419.174	103.19	419.71	93.4989	419.494	92.5152	417.736	89.9307	417.824	85.9708	416.95	80.6434
	419.78	114.483	417.785	115.107	419.805	108.314	420.174	102.19	420.71	94.3901	420.494	92.2124	418.736	88.5527	418.824	86.2198	417.95	81.3431
	420.78	113.7	418.785	115.654	420.805	108.934	421.174	103.217	421.71	93.1847	421.494	92.5005	419.736	88.0986	419.824	85.9441	418.95	81.1189
	421.78	114.219	419.785	115.237	421.805	109.029	422.174	102.652	422.71	94.4855	422.494	92.4521	420.736	88.1699	420.824	85.5902	419.95	79.1541
	422.78	114.003	420.785	115.291	422.805	109.395	423.174	102.2	423.71	94.4618	423.494	91.3188	421.736	88.0643	421.824	85.5045	420.95	80.5613
	423.78	115.245	421.785	115.025	423.805	109.325	424.174	102.625	424.71	93.4035	424.494	92.7521	422.736	89.1345	422.824	86.2044	421.95	80.8983
	424.78	114.756	422.785	115.206	424.805	108.987	425.174	103.18	425.71	93.9712	425.494	92.2348	423.736	88.6274	423.824	86.0116	422.95	81.0125
	425.78	114.666	423.785	115.41	425.805	107.478	426.174	102.493	426.71	93.9972	426.494	91.8974	424.736	89.3038	424.824	86.0793	423.95	79.7178
	426.78	113.379	424.785	115.521	426.805	109.493	427.174	103.193	427.71	94.8209	427.494	92.6278	425.736	88.6687	425.824	85.7025	424.95	81.1749
	427.78	114.498	425.785	115.789	427.805	109.789	428.174	101.912	428.71	93.9464	428.494	91.832	426.736	88.2709	426.824	86.3691	425.95	80.3421
	428.78	115.149	426.785	116.089	428.805	108.872	429.174	103.503	429.71	93.6858	429.494	91.8709	427.736	88.6308	427.824	86.5991	426.95	81.196
	429.78	115.256	427.785	115.936	429.805	109.216	430.174	102.11	430.71	93.8394	430.494	91.7614	428.736	88.4224	428.824	85.7731	427.95	81.1858
	430.78	114.182	428.785	115.08	430.805	109.879	431.174	102.397	431.71	93.2552	431.494	91.7266	429.736	87.9748	429.824	86.4705	428.95	81.0518
	431.78	115.118	429.785	115.54	431.805	110.609	432.174	103.886	432.71	93.8218	432.494	92.7316	430.736	88.8003	430.824	86.7527	429.95	81.1126
	432.78	114.199	430.785	116.032	432.805	109.622	433.174	103.154	433.71	93.3186	433.494	92.1329	431.736	89.9239	431.824	85.0341	430.95	81.1435
	433.78	115.058	431.785	116.019	433.805	109.871	434.174	102.878	434.71	93.2877	434.494	92.4596	432.736	88.4758	432.824	86.6237	431.95	82.0318
	434.78	114.563	432.785	116.045	434.805	108.923	435.174	102.16	435.71	94.4377	435.494	92.4232	433.736	87.5701	433.824	86.6243	432.95	80.3822
	435.78	116.143	433.785	116.484	435.805	109.195	436.174	102.33	436.71	94.1566	436.494	91.5024	434.736	88.4262	434.824	85.4999	433.95	81.6548
	436.78	116.154	434.785	117.721	436.805	109.633	437.174	102.988	437.71	93.7512	437.494	92.4093	435.736	88.3414	435.824	86.3231	434.95	80.6809
	437.78	115.108	435.785	116.776	437.805	110.049	438.174	102.953	438.71	94.4007	438.494	92.8349	436.736	87.7734	436.824	86.5511	435.95	81.1468
	438.78	114.93	436.785	116.713	438.805	110.787	439.174	102.935	439.71	94.4994	439.494	92.5055	437.736	89.8588	437.824	84.8475	436.95	81.5218
	439.78	115.245	437.785	116.469	439.805	110.29	440.174	103.495	440.71	94.7591	440.494	92.6937	438.736	88.8424	438.824	86.197	437.95	80.3422
	440.78	116.042	438.785	116.256	440.805	111.731	441.174	104.039	441.71	94.9945	441.494	92.3109	439.736	89.1092	439.824	85.6676	438.95	80.9727
	441.78	115.362	439.785	117.482	441.805	109.608	442.174	103.239	442.71	94.4577	442.494	91.7748	440.736	87.3927	440.824	85.3193	439.95	80.0802
	442.78	115.396	440.785	116.611	442.805	109.612	443.174	103.113	443.71	96.3486	443.494	91.4503	441.736	88.3318	441.824	85.3353	440.95	81.5146
	443.78	115.892	441.785	117.156	443.805	109.951	444.174	103.248	444.71	93.5152	444.494	92.3734	442.736	88.2266	442.824	85.3971	441.95	80.7463
	444.78	115.817	442.785	116.738	444.805	110.418	445.174	102.793	445.71	94.1268	445.494	91.4885	443.736	89.0472	443.824	85.3605	442.95	81.2267
	445.78	117.044	443.785	116.289	445.805	110.806	446.174	103.925	446.71	94.5536	446.494	92.6564	444.736	89.1653	444.824	86.2439	443.95	81.0128
	446.78	116.742	444.785	117.878	446.805	110.846	447.174	104.348	447.71	93.1235	447.494	92.1462	445.736	89.0835	445.824	86.6198	444.95	80.9128
	447.78	116.177	445.785	117.231	447.805	110.664	448.174	104.053	448.71	94.6289	448.494	91.5566	446.736	89.5746	446.824	85.849	445.95	80.47
	448.78	115.626	446.785	116.837	448.805	111.872	449.174	102.892	449.71	94.8501	449.494	92.8207	447.736	88.5995	447.824	86.6193	446.95	81.169
	449.78	117.154	447.785	117.893	449.805	110.622	450.174	103.784	450.71	94.8299	450.494	92.5768	448.736	88.3519	448.824	86.7672	447.95	80.7938
	450.78	116.311	448.785	116.396	450.805	110.718	451.174	103.775	451.71	94.238	451.494	93.2607	449.736	88.0621	449.824	86.3952	448.95	80.9189
	451.78	116.435	449.785	117.052	451.805	110.348	452.174	103.719	452.71	94.0516	452.494	91.2106	450.736	88.3864	450.824	84.8318	449.95	80.3007
	452.78	116.256	450.785	118.891	452.805	111.578	453.174	103.64	453.71	93.8869	453.494	92.4044	451.736	87.9068	451.824	87.0305	450.95	80.9463
	453.78	115.905	451.785	118.445	453.805	110.74	454.174	104.163	454.71	95.0041	454.494	91.3384	452.736	88.5094	452.824	84.5907	451.95	81.5489
	454.78	116.661	452.785	117.849	454.805	111.279	455.174	103.988	455.71	94.6802	455.494	91.4412	453.736	88.9467	453.824	85.9316	452.95	81.2903
	455.78	117.481	453.785	117.937	455.805	110.646	456.174	103.361	456.71	94.8339	456.494	92.695	454.736	89.0479	454.824	85.8983	453.95	80.4441
	456.78	117.89	454.785	117.663	456.805	110.956	457.174	104.214	457.71	94.0954	457.494	92.9455	455.736	89.3118	455.824	86.7619	454.95	81.0113
	457.78	117.076	455.785	118.383	457.805	111.081	458.174	103.316	458.71	95.3742	458.494	92.0851	456.736	88.7361	456.824	86.9815	455.95	81.1045
	458.78	117.979	456.785	118.096	458.805	110.194	459.174	103.634	459.71	95.3929	459.494	92.4332	457.736	88.7403	457.824	85.1211	456.95	80.6928
	459.78	117.32	457.785	118.246	459.805	111.292	460.174	104.789	460.71	94.3284	460.494	91.8822	458.736	88.4811	458.824	86.0892	457.95	80.9653
	460.78	117.22	458.785	118.835	460.805	111.017	461.174	104.281	461.71	94.6915	461.494	92.1539	459.736	88.8737	459.824	87.0613	458.95	80.7834
	461.78	117.769	459.785	118.106	461.805	110.194	462.174	104.309	462.71	95.224	462.494	91.9404	460.736	89.6677	460.824	85.5334	459.95	80.3836
	462.78	117.16	460.785	117.431	462.805	111.414	463.174	104.458	463.71	93.9247	463.494	92.4223	461.736	88.5507	461.824	86.114	460.95	80.5811
	463.78	116.606	461.785	118.082	463.805	112.464	464.174	104.292	464.71	96.1488	464.494	93.3711	462.736	89.4567	462.824	86.8512	461.95	81.1179
	464.78	117.026	462.785	118.282	464.805	111.437	465.174	105.128	465.71	94.7363	465.494	93.2359	463.736	87.6458	463.824	86.013	462.95	80.9906
	465.78	118.338	463.785	118.59	465.805	111.416	466.174	105.086	466.71	94.5701	466.494	92.0627	464.736	88.8828	464.824	85.823	463.95	81.4219
	466.78	117.861	464.785	118.211	466.805	110.287	467.174	104.333	467.71	94.9767	467.494	92.3598	465.736	88.7995	465.824	86.7721	464.95	80.9557
	467.78	118.062	465.785	118.863	467.805	112.377	468.174	103.923	468.71	96.2568	468.494	91.5275	466.736	88.5026	466.824	85.9372	465.95	81.2864
	468.78	118.691	466.785	119.018	468.805	112.044	469.174	104.169	469.71	95.7468	469.494	92.2918	467.736	88.55	467.824	86.0354	466.95	80.937
	469.78	118.411	467.785	118.758	469.805	111.478	470.174	103.857	470.71	94.2566	470.494	92.104	468.736	88.8055	468.824	85.9377	467.95	80.672
	470.78	118.466	468.785	118.271	470.805	110.455	471.174	104.619	471.71	95.1342	471.494	92.4777	469.736	89.2345	469.824	86.3883	468.95	81.2536
	471.78	118.027	469.785	119.128	471.805	111.792	472.174	104.417	472.71	95.5495	472.494	92.0981	470.736	88.9453	470.824	86.1269	469.95	80.7934
	472.78	119.001	470.785	117.518	472.805	112.011	473.174	104.278	473.71	95.0615	473.494	92.1744	471.736	87.9372	471.824	85.9626	470.95	81.6733
	473.78	117.064	471.785	118.756	473.805	110.808	474.174	104.293	474.71	96.3734	474.494	92.9207	472.736	89.7336	472.824	85.7604	471.95	80.0485
	474.78	119.307	472.785	119.577	474.805	110.677	475.174	105.334	475.71	94.641	475.494	93.0006	473.736	88.8701	473.824	85.6516	472.95	81.1203
	475.78	117.415	473.785	118.648	475.805	112.49	476.174	104.899	476.71	95.3926	476.494	92.4623	474.736	88.872	474.824	86.2389	473.95	81.6171
	476.78	118.367	474.785	118.694	476.805	111.832	477.174	105.171	477.71	95.8501	477.494	92.5293	475.736	88.6539	475.824	85.9944	474.95	81.2914
	477.78	117.965	475.785	118.778	477.805	111.651	478.174	103.452	478.71	95.2012	478.494	92.7327	476.736	88.4608	476.824	85.8582	475.95	81.0298
	478.78	118.562	476.785	120.531	478.805	112.666	479.174	105.236	479.71	95.6016	479.494	92.0449	477.736	89.0847	477.824	86.4446	476.95	80.6851
	479.78	117.84	477.785	118.701	479.805	111.155	480.174	104.64	480.71	95.2506	480.494	92.0089	478.736	88.9804	478.824	86.734	477.95	80.4389
	480.78	118.857	478.785	119.946	480.805	111.492	481.174	105.263	481.71	94.4369	481.494	91.3509	479.736	89.0928	479.824	86.6613	478.95	81.0713
	481.78	118.341	479.785	118.688	481.805	111.988	482.174	104.869	482.71	95.5715	482.494	92.1478	480.736	87.6699	480.824	85.2316	479.95	80.6273
	482.78	119.541	480.785	119.172	482.805	112.222	483.174	105.674	483.71	95.4899	483.494	91.6694	481.736	87.7951	481.824	86.5342	480.95	80.9562
	483.78	118.278	481.785	119.229	483.805	112.378	484.174	105.023	484.71	95.1363	484.494	92.4984	482.736	89.4696	482.824	86.512	481.95	81.272
	484.78	119.339	482.785	116.924	484.805	112.218	485.174	105.033	485.71	95.0229	485.494	92.5227	483.736	88.6871	483.824	85.6854	482.95	81.0487
	485.78	119.623	483.785	119.363	485.805	113.026	486.174	104.998	486.71	94.9757	486.494	92.8061	484.736	88.6624	484.824	86.9347	483.95	81.4827
	486.78	118.3	484.785	119.511	486.805	112.448	487.174	104.817	487.71	95.7977	487.494	91.9573	485.736	88.7164	485.824	86.0229	484.95	80.64
	487.78	119.543	485.785	119.063	487.805	112.648	488.174	104.577	488.71	95.6671	488.494	91.966	486.736	88.6553	486.824	86.7989	485.95	80.6621
	488.78	119.681	486.785	119.84	488.805	113.915	489.174	104.961	489.71	95.7465	489.494	92.6461	487.736	89.2311	487.824	86.9354	486.95	80.8932
	489.78	119.952	487.785	119.126	489.805	112.827	490.174	104.926	490.71	94.8403	490.494	91.9223	488.736	88.43	488.824	86.1128	487.95	80.1637
	490.78	121.285	488.785	120.241	490.805	112.821	491.174	104.395	491.71	95.0234	491.494	92.8494	489.736	89.5877	489.824	86.6012	488.95	80.1253
	491.78	120.148	489.785	120.138	491.805	113.188	492.174	106.276	492.71	95.2472	492.494	92.1277	490.736	89.4721	490.824	87.5474	489.95	81.933
	492.78	118.889	490.785	119.676	492.805	113.283	493.174	104.666	493.71	95.0496	493.494	92.717	491.736	89.1517	491.824	86.3449	490.95	80.5495
	493.78	120.77	491.785	119.338	493.805	112.946	494.174	104.853	494.71	95.2985	494.494	92.129	492.736	89.2463	492.824	86.9239	491.95	80.7771
	494.78	119.325	492.785	120.612	494.805	112.913	495.174	105.561	495.71	94.9476	495.494	92.3674	493.736	89.437	493.824	86.0778	492.95	79.8828
	495.78	118.825	493.785	120.054	495.805	112.479	496.174	105.301	496.71	95.6269	496.494	91.8211	494.736	89.1859	494.824	85.8125	493.95	80.5273
	496.78	121.304	494.785	118.872	496.805	113.911	497.174	105.357	497.71	95.7836	497.494	91.7425	495.736	88.6172	495.824	85.8503	494.95	80.8382
	497.78	120.8	495.785	119.589	497.805	112.737	498.174	105.805	498.71	95.3805	498.494	91.2831	496.736	88.1267	496.824	85.8707	495.95	81.3914
	498.78	121.038	496.785	120.631	498.805	111.956	499.174	106.354	499.71	94.8552	499.494	92.6979	497.736	89.8269	497.824	86.4443	496.95	80.8869
	499.78	120.567	497.785	120.054	499.805	113.083	500.174	104.106	500.71	95.7518	500.494	92.5348	498.736	88.8232	498.824	86.4749	497.95	80.6582
	500.78	120.006	498.785	120.054	500.805	114.495	501.174	104.996	501.71	94.7429	501.494	91.4073	499.736	89.3284	499.824	87.2172	498.95	81.2999
	501.78	121.208	499.785	119.414	501.805	112.92	502.174	104.98	502.71	95.0927	502.494	91.8824	500.736	88.8386	500.824	86.5215	499.95	80.6673
	502.78	120.956	500.785	120.449	502.805	113.653	503.174	106.045	503.71	94.9381	503.494	92.6868	501.736	89.4808	501.824	85.2702	500.95	81.7255
	503.78	120.236	501.785	120.609	503.805	114.22	504.174	105.765	504.71	96.2805	504.494	93.0647	502.736	89.6544	502.824	85.7445	501.95	80.6857
	504.78	120.557	502.785	119.948	504.805	114.031	505.174	105.43	505.71	95.6327	505.494	92.3462	503.736	88.408	503.824	86.7688	502.95	79.7943
	505.78	120.419	503.785	121.295	505.805	112.404	506.174	105.145	506.71	95.901	506.494	92.8504	504.736	88.4076	504.824	85.9465	503.95	81.5866
	506.78	121.337	504.785	120.128	506.805	112.766	507.174	105.765	507.71	95.2276	507.494	91.9217	505.736	90.0672	505.824	86.1425	504.95	81.8284
	507.78	121.452	505.785	119.949	507.805	112.601	508.174	106.102	508.71	96.9634	508.494	92.1446	506.736	88.785	506.824	86.5472	505.95	80.7795
	508.78	120.824	506.785	120.701	508.805	113.533	509.174	106.416	509.71	95.2055	509.494	92.1469	507.736	89.0102	507.824	86.5411	506.95	80.7871
	509.78	119.96	507.785	120.236	509.805	113.44	510.174	105.392	510.71	96.401	510.494	91.9335	508.736	88.9592	508.824	85.7365	507.95	81.1982
	510.78	120.643	508.785	120.949	510.805	113.167	511.174	106.888	511.71	95.2774	511.494	92.384	509.736	88.6118	509.824	86.689	508.95	81.024
	511.78	120.838	509.785	120.312	511.805	114.211	512.174	106.219	512.71	96.3493	512.494	92.8094	510.736	88.6728	510.824	85.7738	509.95	81.1487
	512.78	120.69	510.785	119.032	512.805	113.325	513.174	106.178	513.71	96.3436	513.494	91.9312	511.736	87.8264	511.824	86.4313	510.95	80.0201
	513.78	122.241	511.785	120.525	513.805	114.854	514.174	105.21	514.71	95.2284	514.494	92.133	512.736	88.9815	512.824	86.374	511.95	80.9475
	514.78	121.999	512.785	121.029	514.805	114.15	515.174	105.859	515.71	95.0726	515.494	91.8206	513.736	88.5256	513.824	85.4348	512.95	82.0809
	515.78	121.645	513.785	120.867	515.805	113.301	516.174	106.127	516.71	96.427	516.494	91.6845	514.736	89.0819	514.824	86.4866	513.95	81.1156
	516.78	122.092	514.785	120.873	516.805	114.261	517.174	106.6	517.71	95.6079	517.494	92.7672	515.736	89.7493	515.824	86.145	514.95	80.6166
	517.78	122.171	515.785	121.781	517.805	114.216	518.174	106.045	518.71	94.8402	518.494	92.2627	516.736	88.9678	516.824	86.464	515.95	81.2934
	518.78	121.359	516.785	120.961	518.805	115.027	519.174	106.261	519.71	95.4148	519.494	92.8594	517.736	88.5054	517.824	86.347	516.95	81.0614
	519.78	121.369	517.785	120.436	519.805	114.125	520.174	105.972	520.71	95.5482	520.494	91.4185	518.736	88.7266	518.824	86.3835	517.95	80.6911
	520.78	121.487	518.785	121.569	520.805	114.221	521.174	105.018	521.71	94.4849	521.494	92.553	519.736	87.9878	519.824	85.605	518.95	81.0905
	521.78	121.884	519.785	121.199	521.805	113.273	522.174	105.73	522.71	95.0955	522.494	93.1233	520.736	89.2571	520.824	86.5288	519.95	80.3228
	522.78	122.229	520.785	121.737	522.805	113.975	523.174	106.361	523.71	96.7745	523.494	93.0841	521.736	88.2891	521.824	85.708	520.95	81.5195
	523.78	123.098	521.785	121.303	523.805	113.269	524.174	106.52	524.71	96.0323	524.494	92.1098	522.736	89.0583	522.824	85.8838	521.95	81.1877
	524.78	121.212	522.785	122.103	524.805	113.544	525.174	107.443	525.71	95.8506	525.494	91.9274	523.736	89.5024	523.824	86.7259	522.95	80.8655
	525.78	122.785	523.785	121.586	525.805	113.954	526.174	106.636	526.71	94.803	526.494	91.3272	524.736	88.9159	524.824	86.7868	523.95	81.3433
	526.78	121.417	524.785	122.234	526.805	113.93	527.174	106.943	527.71	95.8771	527.494	93.1113	525.736	88.8868	525.824	86.1174	524.95	80.5641
	527.78	121.866	525.785	122.132	527.805	113.978	528.174	106.704	528.71	96.3	528.494	91.9518	526.736	89.2402	526.824	85.7611	525.95	80.6189
	528.78	122.647	526.785	121.582	528.805	114.155	529.174	106.285	529.71	96.0334	529.494	91.702	527.736	89.0822	527.824	86.1292	526.95	81.059
	529.78	121.784	527.785	122.749	529.805	114.467	530.174	106.394	530.71	96.4425	530.494	93.7199	528.736	89.3739	528.824	86.2693	527.95	82.3734
	530.78	122.099	528.785	121.99	530.805	114.866	531.174	106.144	531.71	96.3575	531.494	92.495	529.736	88.8887	529.824	85.7882	528.95	79.8907
	531.78	122.302	529.785	121.708	531.805	114.23	532.174	107.382	532.71	95.9493	532.494	91.6668	530.736	89.7819	530.824	85.8251	529.95	81.2587
	532.78	122.272	530.785	121.366	532.805	114.816	533.174	107.461	533.71	95.8315	533.494	91.8943	531.736	89.2915	531.824	86.5674	530.95	80.9617
	533.78	122.206	531.785	123.287	533.805	114.16	534.174	106.096	534.71	96.1001	534.494	92.3147	532.736	89.2843	532.824	86.8559	531.95	81.1943
	534.78	122.667	532.785	121.861	534.805	115.192	535.174	107.014	535.71	95.8904	535.494	92.4744	533.736	88.686	533.824	85.9682	532.95	80.4069
	535.78	123.316	533.785	121.697	535.805	114.514	536.174	107.319	536.71	96.9192	536.494	92.1226	534.736	89.104	534.824	86.7919	533.95	80.5458
	536.78	123.415	534.785	121.414	536.805	114.617	537.174	106.908	537.71	95.2275	537.494	92.605	535.736	88.7215	535.824	86.1761	534.95	80.8881
	537.78	122.584	535.785	123.223	537.805	114.533	538.174	106.97	538.71	96.0587	538.494	92.5284	536.736	88.5886	536.824	86.3366	535.95	81.0287
	538.78	123.012	536.785	122.864	538.805	114.766	539.174	106.548	539.71	95.7646	539.494	92.3926	537.736	88.8024	537.824	85.9796	536.95	80.6366
	539.78	122.994	537.785	121.402	539.805	114.559	540.174	107.009	540.71	95.0201	540.494	91.8992	538.736	89.1314	538.824	87.3032	537.95	81.4441
	540.78	123.738	538.785	121.978	540.805	115.006	541.174	106.491	541.71	95.4933	541.494	91.8193	539.736	89.218	539.824	86.1352	538.95	81.0023
	541.78	123.67	539.785	121.466	541.805	115.329	542.174	107.724	542.71	96.1389	542.494	92.5077	540.736	89.8267	540.824	86.0626	539.95	80.0682
	542.78	122.592	540.785	123.059	542.805	115.322	543.174	107.399	543.71	96.6239	543.494	93.2904	541.736	88.8714	541.824	86.9349	540.95	80.7002
	543.78	123.511	541.785	123.65	543.805	115.784	544.174	106.247	544.71	96.9246	544.494	93.1352	542.736	89.147	542.824	86.5171	541.95	81.0489
	544.78	124.217	542.785	123.276	544.805	114.964	545.174	106.561	545.71	96.7732	545.494	92.2815	543.736	89.1804	543.824	86.2388	542.95	80.5936
	545.78	123.41	543.785	122.834	545.805	114.337	546.174	107.538	546.71	95.941	546.494	93.3943	544.736	88.1259	544.824	86.8916	543.95	80.7376
	546.78	122.923	544.785	122.137	546.805	115.095	547.174	107.413	547.71	95.7435	547.494	92.6083	545.736	89.5597	545.824	86.0726	544.95	80.8523
	547.78	123.774	545.785	122.572	547.805	116.003	548.174	106.889	548.71	96.4762	548.494	92.5129	546.736	88.5409	546.824	86.1549	545.95	80.4625
	548.78	122.584	546.785	123.781	548.805	115.037	549.174	107.351	549.71	95.581	549.494	92.2315	547.736	89.5424	547.824	86.9872	546.95	81.4897
	549.78	123.946	547.785	121.979	549.805	115.156	550.174	107.671	550.71	96.5766	550.494	93.8041	548.736	89.0805	548.824	86.4969	547.95	80.3945
	550.78	123.999	548.785	122.893	550.805	115.778	551.174	107.419	551.71	96.0639	551.494	92.2306	549.736	89.7021	549.824	85.7232	548.95	80.2895
	551.78	123.534	549.785	123.061	551.805	115.479	552.174	108.113	552.71	95.0123	552.494	92.2811	550.736	88.8013	550.824	86.7389	549.95	82.4141
	552.78	124.366	550.785	122.13	552.805	114.553	553.174	106.73	553.71	95.6879	553.494	92.9861	551.736	89.6454	551.824	87.1838	550.95	81.0529
	553.78	122.949	551.785	122.016	553.805	115.653	554.174	107.252	554.71	95.8774	554.494	92.7632	552.736	89.6802	552.824	85.9125	551.95	81.4007
	554.78	124.915	552.785	122.528	554.805	116.407	555.174	108.158	555.71	96.2077	555.494	92.2821	553.736	88.3868	553.824	86.5234	552.95	81.075
	555.78	124.46	553.785	123.074	555.805	115.427	556.174	107.429	556.71	96.3528	556.494	92.6909	554.736	88.1745	554.824	85.3356	553.95	80.8939
	556.78	124.108	554.785	122.366	556.805	116.699	557.174	107.442	557.71	96.2975	557.494	93.4396	555.736	90.1643	555.824	86.6255	554.95	80.8824
	557.78	125.987	555.785	123.08	557.805	115.777	558.174	107.637	558.71	96.2554	558.494	93.3389	556.736	88.5153	556.824	86.2268	555.95	81.5671
	558.78	124.681	556.785	122.347	558.805	116.301	559.174	107.366	559.71	97.6878	559.494	93.0402	557.736	89.8474	557.824	86.9135	556.95	80.1195
	559.78	124.46	557.785	123.144	559.805	114.962	560.174	108.178	560.71	96.4155	560.494	92.5857	558.736	89.3374	558.824	86.8424	557.95	80.485
	560.78	124.291	558.785	123.005	560.805	115.63	561.174	106.604	561.71	95.972	561.494	92.3521	559.736	88.9923	559.824	86.1572	558.95	80.6546
	561.78	124.507	559.785	122.811	561.805	116.05	562.174	108.224	562.71	96.7572	562.494	93.5535	560.736	89.2671	560.824	86.247	559.95	81.6204
	562.78	123.722	560.785	122.994	562.805	115.894	563.174	107.527	563.71	96.5511	563.494	92.9417	561.736	88.4541	561.824	86.4403	560.95	81.3909
	563.78	126.043	561.785	123.795	563.805	116.156	564.174	108.097	564.71	96.7935	564.494	93.0482	562.736	89.5519	562.824	85.9062	561.95	80.8198
	564.78	124.863	562.785	123.585	564.805	117.265	565.174	107.208	565.71	95.6697	565.494	92.9365	563.736	89.7032	563.824	85.8796	562.95	81.7383
	565.78	124.726	563.785	123.877	565.805	116.018	566.174	107.743	566.71	96.5602	566.494	92.6718	564.736	89.3034	564.824	86.6911	563.95	80.8587
	566.78	124.663	564.785	123.478	566.805	115.74	567.174	107.78	567.71	96.1768	567.494	93.2078	565.736	88.5918	565.824	86.9145	564.95	81.0709
	567.78	126.08	565.785	122.9	567.805	116.293	568.174	108.274	568.71	96.7184	568.494	92.828	566.736	89.593	566.824	85.9232	565.95	80.4204
	568.78	125.668	566.785	123.018	568.805	116.757	569.174	107.352	569.71	96.4798	569.494	92.6058	567.736	89.5171	567.824	86.7845	566.95	80.9953
	569.78	125.098	567.785	124.285	569.805	116.705	570.174	108.212	570.71	95.8328	570.494	92.2355	568.736	89.355	568.824	86.3131	567.95	80.9002
	570.78	125.627	568.785	123.758	570.805	116.437	571.174	107.195	571.71	96.6932	571.494	92.4928	569.736	89.2038	569.824	86.8688	568.95	80.9958
	571.78	124.601	569.785	124.581	571.805	116.518	572.174	108.424	572.71	95.972	572.494	92.2342	570.736	89.2385	570.824	88.001	569.95	80.9937
	572.78	125.184	570.785	123.888	572.805	116.439	573.174	107.595	573.71	96.7331	573.494	92.213	571.736	90.2848	571.824	86.322	570.95	82.0763
	573.78	125.823	571.785	123.222	573.805	116.825	574.174	108.101	574.71	96.34	574.494	92.8288	572.736	88.5127	572.824	86.6259	571.95	81.0687
	574.78	125.929	572.785	123.44	574.805	115.83	575.174	108.631	575.71	96.9469	575.494	91.994	573.736	89.0803	573.824	86.7516	572.95	81.3383
	575.78	126.144	573.785	124.103	575.805	117.268	576.174	108.444	576.71	96.3646	576.494	92.2553	574.736	88.1118	574.824	87.8982	573.95	81.9418
	576.78	125.221	574.785	124.279	576.805	116.018	577.174	107.228	577.71	96.8164	577.494	93.0249	575.736	89.7399	575.824	86.2538	574.95	81.5534
	577.78	126.843	575.785	122.965	577.805	116.114	578.174	107.626	578.71	96.3417	578.494	92.8735	576.736	88.9858	576.824	86.7807	575.95	80.7606
	578.78	124.679	576.785	123.642	578.805	116.845	579.174	108.774	579.71	95.8755	579.494	92.4985	577.736	88.7394	577.824	85.9427	576.95	81.3486
	579.78	125.599	577.785	123.976	579.805	116.673	580.174	108.103	580.71	96.7317	580.494	92.7977	578.736	88.9277	578.824	87.1152	577.95	81.4907
	580.78	125.406	578.785	124.16	580.805	116.629	581.174	108.595	581.71	96.5557	581.494	92.8971	579.736	89.619	579.824	86.5368	578.95	81.2014
	581.78	125.938	579.785	124.352	581.805	118.356	582.174	107.726	582.71	96.2236	582.494	93.3789	580.736	89.4221	580.824	86.3856	579.95	81.3422
	582.78	126.085	580.785	124.991	582.805	117.83	583.174	107.941	583.71	96.1454	583.494	92.8391	581.736	89.6542	581.824	86.3432	580.95	81.1955
	583.78	126.663	581.785	123.9	583.805	116.444	584.174	108.579	584.71	96.4963	584.494	93.3225	582.736	89.1992	582.824	86.7859	581.95	80.544
	584.78	126.264	582.785	124.771	584.805	117.369	585.174	108.465	585.71	96.3214	585.494	93.0174	583.736	88.8077	583.824	86.4651	582.95	80.6207
	585.78	126.344	583.785	123.622	585.805	117.47	586.174	108.058	586.71	96.7454	586.494	92.7178	584.736	88.9832	584.824	85.8445	583.95	81.1521
	586.78	125.825	584.785	123.973	586.805	116.803	587.174	107.777	587.71	96.934	587.494	92.9818	585.736	88.8446	585.824	86.9125	584.95	81.2901
	587.78	126.98	585.785	123.655	587.805	118.111	588.174	108.009	588.71	96.3929	588.494	93.0502	586.736	89.271	586.824	86.2581	585.95	80.2481
	588.78	126.812	586.785	124.656	588.805	117.094	589.174	108.384	589.71	96.5905	589.494	93.3185	587.736	89.5204	587.824	86.7324	586.95	81.6788
	589.78	127.047	587.785	124.318	589.805	116.737	590.174	108.576	590.71	97.4956	590.494	92.909	588.736	89.209	588.824	86.1852	587.95	80.9182
	590.78	126.681	588.785	124.985	590.805	117.494	591.174	109.114	591.71	97.3496	591.494	93.2317	589.736	89.5492	589.824	85.5992	588.95	81.2958
	591.78	126.362	589.785	124.581	591.805	118.089	592.174	108.523	592.71	96.978	592.494	93.1546	590.736	88.7742	590.824	86.3653	589.95	81.7524
	592.78	126.633	590.785	124.408	592.805	116.925	593.174	108.193	593.71	97.2179	593.494	92.8876	591.736	89.4638	591.824	85.9647	590.95	81.2737
	593.78	126.952	591.785	124.818	593.805	117.93	594.174	109.152	594.71	96.5782	594.494	92.8661	592.736	89.2223	592.824	85.7998	591.95	81.7405
	594.78	126.413	592.785	124.364	594.805	117.222	595.174	108.62	595.71	97.6301	595.494	94.2854	593.736	88.7366	593.824	86.1123	592.95	80.9963
	595.78	126.253	593.785	124.89	595.805	117.544	596.174	108.777	596.71	97.5014	596.494	93.1908	594.736	89.0747	594.824	86.8985	593.95	81.327
	596.78	127.135	594.785	125.659	596.805	117.64	597.174	107.612	597.71	97.0239	597.494	92.3919	595.736	89.2595	595.824	86.4696	594.95	80.7492
	597.78	127.201	595.785	124.395	597.805	117.559	598.174	109.126	598.71	97.6457	598.494	92.8397	596.736	89.4239	596.824	86.444	595.95	80.558
	598.78	126.833	596.785	124.506	598.805	118.101	599.174	108.725	599.71	97.2494	599.494	92.7571	597.736	89.3573	597.824	86.3897	596.95	81.0383
	599.78	127.521	597.785	124.925	599.805	118.327	600.174	108.147	600.71	96.0769	600.494	92.7315	598.736	88.3045	598.824	86.5316	597.95	80.9111
	600.78	127.846	598.785	124.449	600.805	117.142	601.174	108.777	601.71	97.754	601.494	92.6829	599.736	89.2428	599.824	87.725	598.95	80.9624
	601.78	126.987	599.785	126.029	601.805	117.235	602.174	110.126	602.71	97.3466	602.494	92.4246	600.736	89.0224	600.824	87.0879	599.95	81.2245
	602.78	128.061	600.785	125.381	602.805	117.17	603.174	109.074	603.71	97.5006	603.494	93.0911	601.736	90.0007	601.824	85.5316	600.95	81.6213
	603.78	126.856	601.785	125.561	603.805	118.491	604.174	109.972	604.71	96.2765	604.494	93.5573	602.736	89.2138	602.824	87.1136	601.95	80.6972
	604.78	128.061	602.785	125.43	604.805	117.434	605.174	109.164	605.71	96.9518	605.494	92.7561	603.736	89.255	603.824	86.1411	602.95	81.6644
	605.78	127.112	603.785	125.393	605.805	118.002	606.174	108.289	606.71	97.677	606.494	92.7825	604.736	88.6663	604.824	86.7088	603.95	80.7699
	606.78	128.353	604.785	125.31	606.805	117.872	607.174	108.61	607.71	96.9119	607.494	93.1927	605.736	89.5983	605.824	87.2062	604.95	81.4072
	607.78	127.39	605.785	125.781	607.805	117.713	608.174	110.201	608.71	96.6194	608.494	92.4078	606.736	88.3831	606.824	87.0719	605.95	80.9667
	608.78	127.696	606.785	126.029	608.805	118.251	609.174	109.287	609.71	96.7792	609.494	93.0945	607.736	89.119	607.824	86.3965	606.95	80.5987
	609.78	126.423	607.785	126.146	609.805	119.256	610.174	108.974	610.71	97.9782	610.494	92.7252	608.736	88.1809	608.824	87.5241	607.95	80.5016
	610.78	127.828	608.785	124.786	610.805	118.606	611.174	109.37	611.71	96.5779	611.494	93.1937	609.736	89.8348	609.824	85.5415	608.95	81.1504
	611.78	127.856	609.785	125.755	611.805	117.785	612.174	109.875	612.71	97.9351	612.494	93.8536	610.736	89.0123	610.824	86.2105	609.95	80.5689
	612.78	127.026	610.785	125.196	612.805	118.851	613.174	108.862	613.71	97.0824	613.494	93.4987	611.736	88.7827	611.824	87.1927	610.95	81.5253
	613.78	127.943	611.785	124.75	613.805	118.818	614.174	108.803	614.71	97.4777	614.494	92.9513	612.736	89.5146	612.824	86.6548	611.95	80.4637
	614.78	127.281	612.785	125.707	614.805	118.49	615.174	109.211	615.71	96.8426	615.494	92.3604	613.736	89.4944	613.824	87.3238	612.95	81.2106
	615.78	127.366	613.785	125.268	615.805	117.654	616.174	108.763	616.71	97.1525	616.494	92.5158	614.736	89.3635	614.824	87.5155	613.95	80.3897
	616.78	128.346	614.785	125.508	616.805	118.545	617.174	108.355	617.71	97.982	617.494	93.8191	615.736	89.9051	615.824	86.4825	614.95	81.8641
	617.78	127.884	615.785	125.64	617.805	118.735	618.174	109.489	618.71	97.4639	618.494	94.1106	616.736	88.9941	616.824	86.7463	615.95	81.3214
	618.78	127.938	616.785	125.367	618.805	118.046	619.174	109.464	619.71	98.1019	619.494	93.9141	617.736	89.8231	617.824	87.6048	616.95	81.2162
	619.78	128.305	617.785	127.07	619.805	119.14	620.174	110.117	620.71	96.8202	620.494	93.2266	618.736	90.2836	618.824	86.6105	617.95	80.1708
	620.78	128.674	618.785	126.304	620.805	117.97	621.174	109.356	621.71	96.4096	621.494	93.513	619.736	90.1993	619.824	86.918	618.95	80.1976
	621.78	129.041	619.785	126.146	621.805	118.551	622.174	108.998	622.71	97.1972	622.494	93.4069	620.736	89.067	620.824	87.051	619.95	80.4819
	622.78	128.187	620.785	126.069	622.805	117.66	623.174	109.475	623.71	97.8341	623.494	93.5851	621.736	89.5474	621.824	87.0332	620.95	80.2664
	623.78	129.202	621.785	127.021	623.805	118.847	624.174	110.259	624.71	98.1585	624.494	93.3345	622.736	89.2464	622.824	88.1686	621.95	80.7732
	624.78	127.43	622.785	125.582	624.805	118.837	625.174	110.001	625.71	98.2076	625.494	92.7951	623.736	89.2844	623.824	86.3761	622.95	80.9698
	625.78	128.551	623.785	126.724	625.805	118.9	626.174	108.558	626.71	96.9789	626.494	92.8796	624.736	89.3267	624.824	86.1054	623.95	80.6557
	626.78	129.426	624.785	126.473	626.805	119.232	627.174	108.524	627.71	96.9924	627.494	92.9124	625.736	89.6377	625.824	86.4044	624.95	81.4365
	627.78	129.747	625.785	126.659	627.805	119.112	628.174	108.905	628.71	97.9928	628.494	92.9883	626.736	89.203	626.824	86.6709	625.95	81.348
	628.78	129.217	626.785	126.466	628.805	119.69	629.174	109.233	629.71	97.104	629.494	93.3649	627.736	90.4486	627.824	87.6069	626.95	80.9194
	629.78	129.181	627.785	125.53	629.805	119.429	630.174	110.303	630.71	97.1963	630.494	93.0803	628.736	90.1096	628.824	86.7651	627.95	81.1673
	630.78	130.533	628.785	126.984	630.805	119.316	631.174	110.108	631.71	97.5532	631.494	93.315	629.736	89.0292	629.824	86.621	628.95	81.603
	631.78	129.943	629.785	127.111	631.805	119.374	632.174	110.395	632.71	98.4981	632.494	92.6802	630.736	89.7993	630.824	86.5147	629.95	80.8942
	632.78	129.754	630.785	126.523	632.805	118.552	633.174	110.007	633.71	97.1294	633.494	92.8598	631.736	89.1531	631.824	85.9491	630.95	81.6622
	633.78	129.104	631.785	126.789	633.805	119.019	634.174	110.877	634.71	97.8551	634.494	92.8418	632.736	89.3348	632.824	86.9925	631.95	81.6067
	634.78	130.474	632.785	125.961	634.805	118.229	635.174	111.337	635.71	97.5486	635.494	93.385	633.736	89.7083	633.824	87.2503	632.95	80.9243
	635.78	129.827	633.785	126.986	635.805	119.226	636.174	110.153	636.71	97.8865	636.494	93.2707	634.736	89.6441	634.824	86.9598	633.95	80.8403
	636.78	129.638	634.785	126.405	636.805	120.727	637.174	110.195	637.71	97.7381	637.494	92.5887	635.736	89.0468	635.824	87.3832	634.95	82.4981
	637.78	129.273	635.785	127.498	637.805	119.451	638.174	110.767	638.71	97.8252	638.494	93.1554	636.736	89.4288	636.824	87.2992	635.95	81.0184
	638.78	130.424	636.785	127.567	638.805	120.612	639.174	110.063	639.71	99.0367	639.494	93.09	637.736	90.3289	637.824	85.5304	636.95	80.7222
	639.78	129.486	637.785	126.634	639.805	119.944	640.174	109.735	640.71	98.1487	640.494	93.1231	638.736	89.0159	638.824	86.4739	637.95	80.9864
	640.78	129.764	638.785	126.214	640.805	120.716	641.174	110.238	641.71	97.2713	641.494	93.0464	639.736	88.7325	639.824	86.9373	638.95	80.2838
	641.78	130.377	639.785	127.189	641.805	119.041	642.174	110.361	642.71	97.5839	642.494	92.4211	640.736	89.2003	640.824	86.849	639.95	81.4379
	642.78	129.744	640.785	127.69	642.805	120.656	643.174	110.112	643.71	98.477	643.494	93.7059	641.736	89.7884	641.824	86.833	640.95	81.6664
	643.78	129.971	641.785	126.621	643.805	120.642	644.174	110.351	644.71	98.0634	644.494	93.113	642.736	89.5361	642.824	86.0225	641.95	80.9841
	644.78	129.696	642.785	126.493	644.805	120.476	645.174	111.021	645.71	97.6932	645.494	93.8542	643.736	89.6697	643.824	86.0186	642.95	80.3757
	645.78	129.918	643.785	127.44	645.805	120.068	646.174	110.249	646.71	98.4383	646.494	92.7166	644.736	89.2082	644.824	86.9606	643.95	80.6534
	646.78	129.859	644.785	126.888	646.805	118.951	647.174	110.812	647.71	97.1363	647.494	93.1168	645.736	89.7296	645.824	86.308	644.95	80.757
	647.78	129.705	645.785	128.258	647.805	120.926	648.174	110.984	648.71	97.6198	648.494	93.9385	646.736	90.1491	646.824	86.3712	645.95	81.06
	648.78	129.326	646.785	127.301	648.805	119.984	649.174	110.614	649.71	97.2883	649.494	93.7698	647.736	89.3334	647.824	86.4398	646.95	80.8731
	649.78	130.972	647.785	126.97	649.805	119.915	650.174	111.075	650.71	98.0475	650.494	92.3725	648.736	89.3811	648.824	87.0883	647.95	81.1295
	650.78	129.447	648.785	127.65	650.805	120.723	651.174	110.977	651.71	97.9436	651.494	93.826	649.736	89.4293	649.824	86.1111	648.95	80.9269
	651.78	129.286	649.785	127.761	651.805	120.23	652.174	110.599	652.71	98.9049	652.494	93.4304	650.736	89.459	650.824	87.3063	649.95	81.7454
	652.78	130.478	650.785	127.527	652.805	120.468	653.174	110.658	653.71	98.2872	653.494	93.7421	651.736	88.2034	651.824	86.9974	650.95	80.2235
	653.78	131.548	651.785	127.592	653.805	120.35	654.174	111.964	654.71	97.5834	654.494	93.4684	652.736	90.2544	652.824	87.2653	651.95	81.4728
	654.78	130.315	652.785	127.534	654.805	120.143	655.174	110.386	655.71	98.9115	655.494	92.7429	653.736	88.9828	653.824	87.0937	652.95	81.6378
	655.78	130.317	653.785	128.261	655.805	119.256	656.174	111.191	656.71	97.86	656.494	93.1159	654.736	89.4138	654.824	86.5118	653.95	81.0348
	656.78	129.486	654.785	128.347	656.805	121.035	657.174	109.542	657.71	98.3452	657.494	93.0971	655.736	89.2542	655.824	86.3036	654.95	81.3637
	657.78	130.322	655.785	127.867	657.805	119.995	658.174	111.218	658.71	98.1756	658.494	92.9196	656.736	89.5662	656.824	87.2801	655.95	81.7912
	658.78	130.52	656.785	127.973	658.805	119.207	659.174	110.881	659.71	97.964	659.494	93.7326	657.736	89.7391	657.824	87.1627	656.95	81.2301
	659.78	131.813	657.785	127.569	659.805	120.478	660.174	110.673	660.71	97.9122	660.494	92.2236	658.736	90.1024	658.824	87.0967	657.95	80.8026
	660.78	130.676	658.785	128.187	660.805	120.46	661.174	110.953	661.71	99.2189	661.494	93.3152	659.736	89.9655	659.824	87.1762	658.95	80.9005
	661.78	130.456	659.785	127.825	661.805	120.949	662.174	110.744	662.71	97.6569	662.494	94.6052	660.736	89.5273	660.824	87.1626	659.95	80.7726
	662.78	130.182	660.785	128.254	662.805	119.371	663.174	110.924	663.71	98.7102	663.494	92.9865	661.736	88.376	661.824	86.585	660.95	81.5261
	663.78	130.947	661.785	127.763	663.805	121.688	664.174	111.056	664.71	98.2499	664.494	92.1954	662.736	89.528	662.824	87.2442	661.95	80.5257
	664.78	131.521	662.785	128.457	664.805	119.766	665.174	110.974	665.71	97.8111	665.494	92.5965	663.736	88.6095	663.824	87.3786	662.95	80.8119
	665.78	130.507	663.785	128.615	665.805	121.028	666.174	110.487	666.71	98.6924	666.494	93.7684	664.736	89.265	664.824	87.2994	663.95	80.4489
	666.78	131.353	664.785	127.936	666.805	119.782	667.174	110.921	667.71	97.8209	667.494	93.2012	665.736	88.9811	665.824	86.6525	664.95	81.2309
	667.78	131.221	665.785	128.555	667.805	120.428	668.174	111.542	668.71	98.3517	668.494	94.0113	666.736	90.1309	666.824	87.2961	665.95	81.1275
	668.78	131.788	666.785	128.027	668.805	121.529	669.174	111.366	669.71	98.5203	669.494	93.4911	667.736	89.3387	667.824	87.3155	666.95	81.1477
	669.78	131.586	667.785	128.826	669.805	120.96	670.174	110.933	670.71	98.2247	670.494	93.2524	668.736	89.2805	668.824	87.4839	667.95	81.2734
	670.78	131.826	668.785	127.654	670.805	121.022	671.174	110.733	671.71	98.4689	671.494	94.0402	669.736	89.2209	669.824	87.148	668.95	80.8032
	671.78	131.83	669.785	129.648	671.805	120.258	672.174	111.42	672.71	98.6121	672.494	93.4762	670.736	89.4727	670.824	87.1356	669.95	80.742
	672.78	132.314	670.785	129.28	672.805	120.096	673.174	111.977	673.71	99.0237	673.494	93.0282	671.736	90.1562	671.824	87.2871	670.95	80.623
	673.78	131.474	671.785	129.014	673.805	120.98	674.174	111.21	674.71	98.518	674.494	93.5474	672.736	89.5588	672.824	87.1583	671.95	81.2073
	674.78	132.923	672.785	129.708	674.805	120.923	675.174	110.977	675.71	98.0851	675.494	92.3131	673.736	90.522	673.824	86.7036	672.95	80.9647
	675.78	132.302	673.785	129.526	675.805	120.625	676.174	110.548	676.71	97.7963	676.494	93.4743	674.736	89.641	674.824	87.8946	673.95	80.8872
	676.78	132.538	674.785	127.041	676.805	121.888	677.174	112.159	677.71	98.4648	677.494	93.3081	675.736	89.7636	675.824	86.3646	674.95	81.0579
	677.78	132.335	675.785	127.783	677.805	120.727	678.174	111.927	678.71	99.7765	678.494	92.7125	676.736	89.2048	676.824	86.8155	675.95	81.2592
	678.78	131.648	676.785	129.391	678.805	120.347	679.174	111.655	679.71	98.4267	679.494	92.9101	677.736	89.6531	677.824	85.9559	676.95	80.7449
	679.78	131.466	677.785	128.755	679.805	121.492	680.174	111.041	680.71	99.2627	680.494	93.9824	678.736	90.2646	678.824	86.9683	677.95	80.8502
	680.78	132.6	678.785	128.145	680.805	120.685	681.174	111.74	681.71	97.5673	681.494	93.7513	679.736	89.6262	679.824	87.1831	678.95	80.3147
	681.78	132.4	679.785	128.509	681.805	120.954	682.174	111.61	682.71	98.4173	682.494	93.6085	680.736	90.8256	680.824	87.1259	679.95	81.3238
	682.78	131.615	680.785	127.393	682.805	121.119	683.174	110.959	683.71	98.6724	683.494	93.3486	681.736	89.7039	681.824	87.8202	680.95	81.5955
	683.78	132.529	681.785	129.324	683.805	120.784	684.174	111.296	684.71	98.2459	684.494	93.885	682.736	89.2139	682.824	86.5862	681.95	80.5363
	684.78	132.426	682.785	129.211	684.805	121.702	685.174	111.646	685.71	98.9069	685.494	93.755	683.736	89.6603	683.824	86.872	682.95	81.1581
	685.78	132.66	683.785	128.957	685.805	122.335	686.174	111.32	686.71	99.1999	686.494	92.0611	684.736	89.9697	684.824	87.7806	683.95	80.5874
	686.78	132.252	684.785	129.935	686.805	120.997	687.174	111.669	687.71	98.9193	687.494	93.5812	685.736	89.6213	685.824	86.2919	684.95	80.8618
	687.78	132.155	685.785	129.937	687.805	121.501	688.174	111.135	688.71	98.3463	688.494	93.4669	686.736	89.7805	686.824	86.5063	685.95	81.8019
	688.78	131.478	686.785	127.931	688.805	120.601	689.174	112.292	689.71	98.4781	689.494	92.6514	687.736	89.8365	687.824	87.3207	686.95	81.8194
	689.78	132.286	687.785	129.513	689.805	121.157	690.174	111.514	690.71	99.9649	690.494	94.2527	688.736	90.3989	688.824	87.1933	687.95	81.4258
	690.78	133.419	688.785	129.663	690.805	122.109	691.174	112.73	691.71	98.9547	691.494	93.0697	689.736	89.0002	689.824	87.1999	688.95	81.2451
	691.78	132.982	689.785	130.742	691.805	121.215	692.174	112.662	692.71	98.3529	692.494	93.0743	690.736	89.5415	690.824	86.8837	689.95	80.8655
	692.78	132.764	690.785	128.711	692.805	121.866	693.174	111.909	693.71	98.2126	693.494	93.6906	691.736	89.5751	691.824	86.9651	690.95	81.4839
	693.78	133.592	691.785	130.45	693.805	121.397	694.174	110.969	694.71	99.0102	694.494	93.9321	692.736	89.554	692.824	87.1555	691.95	81.4421
	694.78	132.965	692.785	129.284	694.805	121.798	695.174	112.364	695.71	98.147	695.494	94.1121	693.736	89.7705	693.824	87.0364	692.95	81.7493
	695.78	132.561	693.785	129.688	695.805	121.352	696.174	111.808	696.71	97.5247	696.494	93.0031	694.736	89.655	694.824	86.5341	693.95	80.0547
	696.78	133.527	694.785	129.163	696.805	122.087	697.174	111.799	697.71	98.2418	697.494	94.0175	695.736	89.053	695.824	86.1541	694.95	81.2244
	697.78	132.667	695.785	130.323	697.805	120.794	698.174	111.972	698.71	98.7075	698.494	93.8234	696.736	90.3166	696.824	85.9762	695.95	81.1923
	698.78	133.498	696.785	129.964	698.805	122.093	699.174	112.581	699.71	98.9088	699.494	93.1524	697.736	90.5661	697.824	87.3681	696.95	80.8989
	699.78	133.576	697.785	128.517	699.805	122.192	700.174	111.386	700.71	97.7431	700.494	93.2075	698.736	89.1544	698.824	86.9082	697.95	80.9358
	700.78	133.979	698.785	128.798	700.805	122.602	701.174	111.463	701.71	98.9407	701.494	93.5563	699.736	89.9116	699.824	86.6842	698.95	81.0242
	701.78	133.378	699.785	129.046	701.805	122.63	702.174	112.332	702.71	99.2858	702.494	93.0034	700.736	89.0709	700.824	87.6688	699.95	81.2411
	702.78	133.135	700.785	129.664	702.805	122.473	703.174	111.252	703.71	98.246	703.494	93.0764	701.736	89.7768	701.824	86.6662	700.95	81.0793
	703.78	134.175	701.785	129.272	703.805	123.003	704.174	113.038	704.71	99.1152	704.494	93.1993	702.736	89.9908	702.824	87.4837	701.95	81.0164
	704.78	132.772	702.785	130.555	704.805	122.161	705.174	112.582	705.71	98.6123	705.494	93.1628	703.736	90.1482	703.824	86.869	702.95	79.8576
	705.78	134.208	703.785	130.528	705.805	122.4	706.174	112.038	706.71	98.0582	706.494	93.371	704.736	89.8428	704.824	85.9333	703.95	80.9955
	706.78	132.749	704.785	129.17	706.805	122.208	707.174	113.978	707.71	98.6365	707.494	92.9929	705.736	89.6033	705.824	86.3281	704.95	82.3098
	707.78	133.746	705.785	130.037	707.805	122.707	708.174	113.041	708.71	98.036	708.494	93.153	706.736	89.7954	706.824	87.216	705.95	81.5861
	708.78	133.256	706.785	129.487	708.805	121.977	709.174	111.751	709.71	98.9694	709.494	92.5268	707.736	89.4763	707.824	87.0655	706.95	82.4637
	709.78	133.788	707.785	130.619	709.805	123.123	710.174	113.055	710.71	98.0698	710.494	94.238	708.736	90.3159	708.824	87.0881	707.95	81.2303
	710.78	133.494	708.785	129.293	710.805	122.492	711.174	112.603	711.71	98.7507	711.494	92.6944	709.736	89.4399	709.824	87.4221	708.95	81.9163
	711.78	133.954	709.785	130.194	711.805	123.037	712.174	111.931	712.71	99.0166	712.494	94.7002	710.736	89.5081	710.824	86.5033	709.95	81.91
	712.78	134.671	710.785	129.431	712.805	121.901	713.174	112.408	713.71	98.294	713.494	93.0813	711.736	89.4625	711.824	87.1413	710.95	81.9979
	713.78	134.846	711.785	130.263	713.805	122.362	714.174	112.475	714.71	98.779	714.494	93.5739	712.736	90.0877	712.824	88.0911	711.95	81.0288
	714.78	132.721	712.785	129.867	714.805	121.318	715.174	111.667	715.71	98.0885	715.494	92.3326	713.736	89.3833	713.824	87.051	712.95	80.8707
	715.78	134.056	713.785	130.106	715.805	122.34	716.174	110.781	716.71	99.5279	716.494	93.4535	714.736	89.1121	714.824	87.0077	713.95	81.2317
	716.78	133.965	714.785	129.705	716.805	123.618	717.174	112.464	717.71	98.178	717.494	93.6744	715.736	89.4027	715.824	87.4847	714.95	81.2118
	717.78	134.246	715.785	131.492	717.805	122.454	718.174	112.748	718.71	99.4289	718.494	93.3617	716.736	89.5491	716.824	86.996	715.95	81.0847
	718.78	134.493	716.785	129.315	718.805	122.266	719.174	112.312	719.71	99.0902	719.494	93.7495	717.736	89.7891	717.824	87.5463	716.95	81.7989
	719.78	134.27	717.785	131.884	719.805	123.523	720.174	112.164	720.71	99.6422	720.494	93.1999	718.736	89.063	718.824	86.521	717.95	80.123
	720.78	134.241	718.785	130.914	720.805	122.28	721.174	113.008	721.71	98.8278	721.494	93.0926	719.736	89.0059	719.824	86.9882	718.95	81.4923
	721.78	134.817	719.785	131.067	721.805	123.113	722.174	113.095	722.71	98.5599	722.494	93.0516	720.736	89.6721	720.824	87.6888	719.95	80.7308
	722.78	134.122	720.785	129.722	722.805	122.049	723.174	112.608	723.71	98.7425	723.494	92.9083	721.736	89.7346	721.824	86.7602	720.95	79.9951
	723.78	134.503	721.785	131.184	723.805	123.739	724.174	112.577	724.71	98.6506	724.494	93.5491	722.736	89.5998	722.824	87.2498	721.95	81.0312
	724.78	133.685	722.785	131.111	724.805	122.945	725.174	112.899	725.71	99.8342	725.494	94.3115	723.736	89.4184	723.824	87.4725	722.95	81.9282
	725.78	134.145	723.785	130.152	725.805	122.942	726.174	112.777	726.71	99.5234	726.494	93.0717	724.736	89.0907	724.824	87.7487	723.95	81.1594
	726.78	134.005	724.785	130.401	726.805	123.322	727.174	113.667	727.71	99.7375	727.494	93.1688	725.736	88.8586	725.824	86.7113	724.95	80.8128
	727.78	135.283	725.785	129.863	727.805	123.316	728.174	112.734	728.71	99.2249	728.494	93.9965	726.736	89.736	726.824	87.555	725.95	80.5225
	728.78	134.097	726.785	129.874	728.805	122.772	729.174	112.713	729.71	99.4195	729.494	93.1623	727.736	89.5952	727.824	87.4604	726.95	81.2696
	729.78	133.799	727.785	130.362	729.805	122.929	730.174	113.289	730.71	98.8588	730.494	94.1254	728.736	90.4325	728.824	86.589	727.95	81.1962
	730.78	135.781	728.785	130.822	730.805	122.243	731.174	113.719	731.71	100.47	731.494	93.1981	729.736	89.7175	729.824	87.1256	728.95	81.2362
	731.78	136.493	729.785	130.946	731.805	122.981	732.174	112.939	732.71	99.1429	732.494	93.2092	730.736	88.4992	730.824	87.2281	729.95	81.4932
	732.78	135.522	730.785	130.507	732.805	123.162	733.174	113.333	733.71	99.2147	733.494	93.1324	731.736	89.7524	731.824	87.7436	730.95	81.6837
	733.78	134.57	731.785	131.497	733.805	123.668	734.174	112.308	734.71	98.7776	734.494	92.8932	732.736	89.8011	732.824	86.3842	731.95	80.9875
	734.78	135.941	732.785	130.453	734.805	122.662	735.174	113.322	735.71	99.2412	735.494	92.9562	733.736	89.8279	733.824	86.3609	732.95	80.7107
	735.78	134.312	733.785	131.404	735.805	124.283	736.174	112.647	736.71	99.1476	736.494	93.892	734.736	89.264	734.824	87.4248	733.95	81.47
	736.78	134.765	734.785	130.595	736.805	123.044	737.174	114.144	737.71	99.2771	737.494	93.6143	735.736	89.9041	735.824	86.6843	734.95	81.3848
	737.78	135.398	735.785	130.48	737.805	123.194	738.174	112.481	738.71	98.9498	738.494	93.1525	736.736	89.2845	736.824	87.4175	735.95	81.7193
	738.78	134.784	736.785	130.385	738.805	123.604	739.174	113.097	739.71	99.5415	739.494	94.1437	737.736	90.0309	737.824	87.1125	736.95	80.9057
	739.78	134.62	737.785	129.436	739.805	124.265	740.174	113.834	740.71	98.81	740.494	92.792	738.736	90.4984	738.824	86.2085	737.95	81.9813
	740.78	134.978	738.785	130.695	740.805	122.759	741.174	113.462	741.71	99.8567	741.494	92.8838	739.736	90.4397	739.824	87.1565	738.95	82.1222
	741.78	135.291	739.785	131.571	741.805	122.818	742.174	113.689	742.71	99.025	742.494	93.4449	740.736	89.4511	740.824	86.2234	739.95	81.4666
	742.78	135.236	740.785	130.248	742.805	123.623	743.174	112.693	743.71	98.5743	743.494	93.5024	741.736	89.7653	741.824	87.0595	740.95	81.1653
	743.78	136.002	741.785	130.253	743.805	123.461	744.174	113.333	744.71	99.0878	744.494	93.9464	742.736	89.6442	742.824	87.7002	741.95	81.179
	744.78	135.593	742.785	129.65	744.805	123.696	745.174	114.338	745.71	98.8872	745.494	93.1194	743.736	89.8272	743.824	87.0945	742.95	81.5547
	745.78	135.796	743.785	131.521	745.805	125.151	746.174	114.165	746.71	99.1932	746.494	93.6745	744.736	90.5278	744.824	87.1019	743.95	80.7201
	746.78	135.405	744.785	131.586	746.805	123.827	747.174	113.436	747.71	98.6981	747.494	92.8374	745.736	90.045	745.824	87.1037	744.95	82.011
	747.78	135.114	745.785	131.816	747.805	123.257	748.174	113.531	748.71	99.1278	748.494	93.5518	746.736	90.1149	746.824	87.2872	745.95	81.2431
	748.78	135.117	746.785	131.222	748.805	123.278	749.174	112.567	749.71	99.1427	749.494	94.5349	747.736	90.8955	747.824	85.9706	746.95	81.4871
	749.78	135.759	747.785	132.278	749.805	124.279	750.174	113.06	750.71	101.04	750.494	93.8744	748.736	89.5882	748.824	86.5688	747.95	81.9048
	750.78	136.68	748.785	131.212	750.805	123.902	751.174	114.173	751.71	99.3117	751.494	93.3908	749.736	90.2248	749.824	86.9855	748.95	81.7706
	751.78	137.598	749.785	131.713	751.805	124.303	752.174	113.206	752.71	99.8316	752.494	93.3055	750.736	89.9947	750.824	87.3651	749.95	79.984
	752.78	136.51	750.785	131.216	752.805	123.258	753.174	114.212	753.71	98.8716	753.494	94.6182	751.736	89.5992	751.824	86.987	750.95	81.7471
	753.78	135.886	751.785	131.145	753.805	123.673	754.174	112.973	754.71	99.7681	754.494	92.6155	752.736	88.6491	752.824	86.6943	751.95	81.5073
	754.78	136.743	752.785	132.217	754.805	124.489	755.174	113.706	755.71	99.2011	755.494	93.3877	753.736	89.8556	753.824	86.2103	752.95	80.8943
	755.78	136.61	753.785	131.761	755.805	123.953	756.174	113.895	756.71	99.6115	756.494	94.2013	754.736	89.7173	754.824	87.1898	753.95	81.0991
	756.78	136.042	754.785	131.869	756.805	125.478	757.174	113.663	757.71	99.6228	757.494	93.4672	755.736	89.9658	755.824	87.2615	754.95	81.148
	757.78	136.097	755.785	131.39	757.805	125.36	758.174	113.569	758.71	99.158	758.494	93.1006	756.736	90.0665	756.824	87.2796	755.95	82.0742
	758.78	136.561	756.785	132.133	758.805	123.798	759.174	114.766	759.71	98.2478	759.494	94.1259	757.736	90.2453	757.824	86.5111	756.95	81.6695
	759.78	135.61	757.785	132.501	759.805	124.488	760.174	114.578	760.71	99.3943	760.494	93.9693	758.736	88.9526	758.824	86.3741	757.95	80.8636
	760.78	136.781	758.785	131.473	760.805	124.185	761.174	113.594	761.71	99.2863	761.494	94.0392	759.736	90.0351	759.824	86.9471	758.95	82.1814
	761.78	136.02	759.785	132.498	761.805	124.392	762.174	114.734	762.71	99.1697	762.494	93.5721	760.736	88.9479	760.824	87.5457	759.95	79.6453
	762.78	137.006	760.785	130.915	762.805	124.587	763.174	114.2	763.71	99.9555	763.494	93.6918	761.736	90.1218	761.824	86.8356	760.95	81.7924
	763.78	136.669	761.785	131.382	763.805	123.725	764.174	114.171	764.71	99.5407	764.494	93.4666	762.736	89.3976	762.824	86.9065	761.95	81.6529
	764.78	135.869	762.785	131.438	764.805	124.016	765.174	113.647	765.71	99.8968	765.494	93.8537	763.736	90.2431	763.824	87.6204	762.95	81.1626
	765.78	136.968	763.785	131.502	765.805	124.272	766.174	112.993	766.71	99.9472	766.494	93.1359	764.736	90.0387	764.824	86.6332	763.95	79.9101
	766.78	135.592	764.785	132.189	766.805	123.836	767.174	114.176	767.71	100.487	767.494	93.8082	765.736	90.2441	765.824	86.9303	764.95	80.9435
	767.78	136.917	765.785	132.277	767.805	124.704	768.174	114.228	768.71	99.9848	768.494	93.7146	766.736	89.958	766.824	87.1641	765.95	81.6145
	768.78	136.165	766.785	131.707	768.805	123.478	769.174	113.076	769.71	99.8982	769.494	94.1856	767.736	90.203	767.824	87.6961	766.95	81.1277
	769.78	136.689	767.785	131.876	769.805	124.284	770.174	113.597	770.71	99.3846	770.494	94.1392	768.736	90.116	768.824	87.145	767.95	81.3453
	770.78	136.378	768.785	131.534	770.805	124.543	771.174	113.053	771.71	99.9975	771.494	92.6752	769.736	89.7014	769.824	86.9045	768.95	81.9405
	771.78	137.045	769.785	132.347	771.805	124.543	772.174	114.718	772.71	99.6145	772.494	93.2527	770.736	90.0682	770.824	86.6871	769.95	81.149
	772.78	136.376	770.785	132.636	772.805	126.01	773.174	115.072	773.71	99.5235	773.494	94.4165	771.736	89.7771	771.824	87.7186	770.95	81.4398
	773.78	137.601	771.785	132.493	773.805	124.807	774.174	114.539	774.71	99.865	774.494	94.0878	772.736	90.9057	772.824	86.1884	771.95	81.0603
	774.78	137.539	772.785	133.22	774.805	125.404	775.174	113.609	775.71	99.7877	775.494	93.8099	773.736	90.4966	773.824	87.7134	772.95	81.2375
	775.78	136.535	773.785	132.293	775.805	124.792	776.174	113.893	776.71	99.1617	776.494	93.4321	774.736	90.4965	774.824	87.6093	773.95	80.5533
	776.78	137.491	774.785	131.982	776.805	124.719	777.174	114.393	777.71	99.5516	777.494	93.3627	775.736	90.3084	775.824	87.9373	774.95	81.623
	777.78	136.583	775.785	133.244	777.805	125.141	778.174	115.101	778.71	99.8542	778.494	93.943	776.736	90.3043	776.824	86.753	775.95	81.9249
	778.78	136.593	776.785	132.624	778.805	123.84	779.174	114.344	779.71	101.014	779.494	93.18	777.736	90.5617	777.824	88.1178	776.95	81.9003
	779.78	137.206	777.785	131.606	779.805	125.08	780.174	114.721	780.71	99.7492	780.494	94.026	778.736	89.3682	778.824	87.4374	777.95	81.3688
	780.78	138.784	778.785	132.947	780.805	123.824	781.174	115.582	781.71	100.293	781.494	93.7384	779.736	90.2789	779.824	87.4045	778.95	80.4905
	781.78	137.532	779.785	133.949	781.805	124.756	782.174	114.776	782.71	99.8832	782.494	94.4442	780.736	89.4634	780.824	86.7883	779.95	81.9661
	782.78	138.323	780.785	133.979	782.805	124.409	783.174	114.237	783.71	100.199	783.494	94.3477	781.736	89.7368	781.824	87.0631	780.95	81.3748
	783.78	136.896	781.785	132.549	783.805	125.139	784.174	113.645	784.71	100.411	784.494	93.7519	782.736	89.7936	782.824	86.5529	781.95	81.3832
	784.78	137.419	782.785	133.298	784.805	124.695	785.174	113.576	785.71	100.825	785.494	93.1679	783.736	90.7692	783.824	86.6829	782.95	81.2182
	785.78	139.205	783.785	133.863	785.805	125.103	786.174	114.516	786.71	100.604	786.494	93.4258	784.736	89.7127	784.824	87.8096	783.95	81.0889
	786.78	137.571	784.785	132.478	786.805	126.239	787.174	114.02	787.71	99.3108	787.494	93.1212	785.736	89.9541	785.824	86.4699	784.95	80.7144
	787.78	137.893	785.785	133.456	787.805	125.323	788.174	115.588	788.71	99.9181	788.494	93.8795	786.736	90.3741	786.824	87.4818	785.95	80.9971
	788.78	138.214	786.785	132.486	788.805	124.847	789.174	113.835	789.71	100.334	789.494	93.2363	787.736	89.586	787.824	87.0442	786.95	81.6122
	789.78	138.183	787.785	132.917	789.805	124.834	790.174	114.902	790.71	100.474	790.494	93.3834	788.736	90.1307	788.824	88.0323	787.95	81.5649
	790.78	137.532	788.785	133.139	790.805	125.208	791.174	114.577	791.71	100.689	791.494	93.5753	789.736	89.904	789.824	86.6604	788.95	80.5487
	791.78	138.339	789.785	133.751	791.805	126.03	792.174	115.315	792.71	100.268	792.494	93.7859	790.736	90.1383	790.824	86.449	789.95	81.4283
	792.78	138.06	790.785	133.099	792.805	125.181	793.174	114.321	793.71	100.263	793.494	94.0847	791.736	90.2753	791.824	88.0245	790.95	82.3226
	793.78	138.897	791.785	133.585	793.805	124.207	794.174	114.294	794.71	100.488	794.494	94.2456	792.736	90.2722	792.824	88.1914	791.95	81.1074
	794.78	136.895	792.785	132.469	794.805	126.122	795.174	115.583	795.71	100.236	795.494	94.1181	793.736	90.2749	793.824	88.1846	792.95	81.7379
	795.78	137.749	793.785	133.512	795.805	125.584	796.174	115.631	796.71	100.268	796.494	94.2026	794.736	89.6845	794.824	87.6578	793.95	81.2953
	796.78	137.939	794.785	133.433	796.805	124.965	797.174	114.69	797.71	100.136	797.494	92.984	795.736	90.3577	795.824	87.3555	794.95	80.6384
	797.78	138.347	795.785	133.538	797.805	125.843	798.174	115.332	798.71	100.965	798.494	93.9456	796.736	89.7891	796.824	86.993	795.95	81.0519
	798.78	138.302	796.785	134.066	798.805	125.718	799.174	114.086	799.71	100.414	799.494	93.9543	797.736	89.8262	797.824	86.7456	796.95	81.1279
	799.78	136.879	797.785	132.596	799.805	126.859	800.174	115.767	800.71	100.718	800.494	94.0628	798.736	89.0965	798.824	87.382	797.95	81.5906
	800.78	138.86	798.785	133.756	800.805	125.268	801.174	114.826	801.71	99.5298	801.494	93.7925	799.736	90.2614	799.824	87.1194	798.95	81.7202
	801.78	138.649	799.785	133.05	801.805	125.754	802.174	114.984	802.71	100.725	802.494	93.652	800.736	89.1411	800.824	87.1294	799.95	81.3711
	802.78	137.812	800.785	133.825	802.805	124.705	803.174	115.026	803.71	99.9195	803.494	94.1376	801.736	90.8955	801.824	86.6189	800.95	81.6916
	803.78	138.623	801.785	134.129	803.805	124.791	804.174	115.442	804.71	100.915	804.494	92.7607	802.736	90.7093	802.824	87.5177	801.95	80.8678
	804.78	139.07	802.785	134.953	804.805	125.713	805.174	114.111	805.71	100.377	805.494	93.9191	803.736	89.5298	803.824	87.7483	802.95	82.0758
	805.78	139.028	803.785	133.834	805.805	126.62	806.174	115.667	806.71	100.614	806.494	93.4995	804.736	90.0937	804.824	86.6069	803.95	81.2268
	806.78	139.153	804.785	133.323	806.805	126.65	807.174	114.876	807.71	99.899	807.494	93.1771	805.736	90.7245	805.824	87.2751	804.95	82.3339
	807.78	138.113	805.785	134.407	807.805	126.011	808.174	114.732	808.71	99.2832	808.494	93.2678	806.736	89.5645	806.824	86.9856	805.95	81.2727
	808.78	138.713	806.785	133.546	808.805	125.771	809.174	114.202	809.71	100.151	809.494	93.65	807.736	89.4689	807.824	86.6917	806.95	81.4978
	809.78	138.254	807.785	135.499	809.805	126.563	810.174	114.85	810.71	100.33	810.494	94.5516	808.736	88.8894	808.824	86.3902	807.95	81.6349
	810.78	139.393	808.785	133.37	810.805	126.296	811.174	115.881	811.71	100.212	811.494	93.7264	809.736	90.2404	809.824	86.7306	808.95	80.7854
	811.78	138.541	809.785	134.451	811.805	125.647	812.174	114.643	812.71	100.398	812.494	93.5015	810.736	90.1348	810.824	87.7868	809.95	81.5285
	812.78	138.834	810.785	134.712	812.805	126.655	813.174	114.523	813.71	99.6	813.494	93.2692	811.736	90.3764	811.824	86.5388	810.95	80.7139
	813.78	139.325	811.785	134.795	813.805	126.219	814.174	115.18	814.71	99.1853	814.494	92.8554	812.736	90.2683	812.824	86.8993	811.95	81.182
	814.78	139.174	812.785	134.371	814.805	126.011	815.174	114.657	815.71	100.178	815.494	93.3187	813.736	89.5291	813.824	87.5441	812.95	81.4765
	815.78	138.656	813.785	134.474	815.805	126.085	816.174	114.6	816.71	98.9632	816.494	93.5401	814.736	89.7369	814.824	87.8768	813.95	82.0909
	816.78	139.695	814.785	134.917	816.805	126.399	817.174	115.516	817.71	99.5862	817.494	93.7614	815.736	89.5672	815.824	87.3417	814.95	81.399
	817.78	139.336	815.785	134.636	817.805	125.88	818.174	115.115	818.71	101.161	818.494	93.7374	816.736	89.8331	816.824	86.6069	815.95	81.4003
	818.78	138.271	816.785	133.411	818.805	126.953	819.174	115.324	819.71	100.089	819.494	93.9867	817.736	89.9079	817.824	87.9541	816.95	81.9548
	819.78	139.822	817.785	133.599	819.805	126.539	820.174	115.639	820.71	100.048	820.494	93.7409	818.736	89.2152	818.824	87.2897	817.95	81.7704
	820.78	139.1	818.785	134.561	820.805	126.881	821.174	116.795	821.71	99.9278	821.494	94.167	819.736	89.8406	819.824	87.3036	818.95	81.7678
	821.78	139.371	819.785	134.244	821.805	126.399	822.174	115.659	822.71	100.601	822.494	93.1827	820.736	89.9875	820.824	87.6437	819.95	81.1038
	822.78	139.873	820.785	133.822	822.805	127.414	823.174	115.259	823.71	99.4646	823.494	92.7214	821.736	90.6055	821.824	87.2459	820.95	81.2975
	823.78	139.559	821.785	134.349	823.805	127.277	824.174	115.063	824.71	99.8935	824.494	92.6362	822.736	90.6866	822.824	86.8859	821.95	82.0494
	824.78	139.06	822.785	134.671	824.805	127.29	825.174	114.532	825.71	101.134	825.494	94.1364	823.736	90.1339	823.824	87.7345	822.95	81.1488
	825.78	139.929	823.785	135.106	825.805	126.19	826.174	115.719	826.71	100.235	826.494	93.7532	824.736	89.4477	824.824	87.045	823.95	82.138
	826.78	139.697	824.785	134.389	826.805	126.404	827.174	115.358	827.71	100.704	827.494	93.7927	825.736	90.0864	825.824	86.8038	824.95	80.9502
	827.78	140.365	825.785	134.296	827.805	126.912	828.174	115.742	828.71	100.814	828.494	94.2549	826.736	90.499	826.824	86.32	825.95	82.1754
	828.78	140.152	826.785	134.467	828.805	127.223	829.174	115.409	829.71	101.131	829.494	94.826	827.736	90.4517	827.824	86.5887	826.95	81.0909
	829.78	140.691	827.785	134.173	829.805	126.111	830.174	115.793	830.71	99.4174	830.494	94.1431	828.736	89.99	828.824	87.4525	827.95	81.869
	830.78	141.097	828.785	134.22	830.805	126.505	831.174	116.316	831.71	100.399	831.494	94.3055	829.736	89.744	829.824	87.1886	828.95	81.2495
	831.78	139.72	829.785	134.662	831.805	126.184	832.174	114.715	832.71	100.468	832.494	93.6498	830.736	90.0606	830.824	87.4877	829.95	81.1798
	832.78	140.827	830.785	134.322	832.805	126.745	833.174	115.692	833.71	101.514	833.494	92.5325	831.736	89.3937	831.824	87.5469	830.95	81.224
	833.78	140.722	831.785	135.635	833.805	127.013	834.174	116.093	834.71	100.479	834.494	94.391	832.736	91.3327	832.824	86.9458	831.95	80.981
	834.78	140.197	832.785	133.389	834.805	126.138	835.174	115.875	835.71	100.435	835.494	93.6659	833.736	89.516	833.824	86.8665	832.95	81.2437
	835.78	139.557	833.785	135.163	835.805	127.411	836.174	115.666	836.71	101.189	836.494	94.0165	834.736	90.321	834.824	87.9301	833.95	80.7791
	836.78	141.563	834.785	136.069	836.805	126.581	837.174	115.37	837.71	100.634	837.494	94.8821	835.736	89.9688	835.824	86.9995	834.95	81.8558
	837.78	141.529	835.785	135.001	837.805	127.685	838.174	116.38	838.71	101.171	838.494	93.2933	836.736	90.6807	836.824	86.6634	835.95	81.3711
	838.78	140.84	836.785	135.381	838.805	127.837	839.174	117.095	839.71	100.414	839.494	94.1778	837.736	90.0817	837.824	87.2182	836.95	81.2555
	839.78	138.568	837.785	135.058	839.805	127.878	840.174	115.26	840.71	100.369	840.494	93.4355	838.736	88.5258	838.824	88.4167	837.95	81.0356
	840.78	140.614	838.785	134.969	840.805	127.201	841.174	116.056	841.71	100.82	841.494	93.9205	839.736	90.6316	839.824	87.2377	838.95	80.0533
	841.78	140.141	839.785	134.893	841.805	128.263	842.174	115.561	842.71	100.361	842.494	93.0877	840.736	90.5343	840.824	86.8527	839.95	81.152
	842.78	141.152	840.785	136.786	842.805	126.396	843.174	116.14	843.71	100.51	843.494	93.0956	841.736	90.2744	841.824	87.1348	840.95	81.4637
	843.78	140.175	841.785	135.242	843.805	127.563	844.174	115.952	844.71	99.5991	844.494	94.2718	842.736	90.6475	842.824	86.2763	841.95	81.3011
	844.78	140.914	842.785	135.682	844.805	127.335	845.174	115.332	845.71	101.577	845.494	93.6841	843.736	90.8947	843.824	88.0346	842.95	81.5997
	845.78	141.381	843.785	135.452	845.805	127.491	846.174	115.532	846.71	101.082	846.494	94.4838	844.736	89.3841	844.824	87.8548	843.95	81.6203
	846.78	139.79	844.785	135.248	846.805	127.548	847.174	115.521	847.71	100.379	847.494	93.8776	845.736	89.7611	845.824	87.8495	844.95	82.1012
	847.78	140.639	845.785	135.576	847.805	127.442	848.174	116.503	848.71	100.571	848.494	94.939	846.736	90.4586	846.824	87.5623	845.95	81.5607
	848.78	141.091	846.785	135.045	848.805	127.038	849.174	115.853	849.71	101.51	849.494	94.3233	847.736	89.639	847.824	87.0708	846.95	82.4156
	849.78	141.639	847.785	134.785	849.805	127.485	850.174	116.137	850.71	100.494	850.494	93.8083	848.736	89.8377	848.824	87.8289	847.95	80.9043
	850.78	140.55	848.785	134.735	850.805	128.194	851.174	115.882	851.71	100.643	851.494	95.0449	849.736	90.8285	849.824	88.1797	848.95	81.5201
	851.78	141.419	849.785	133.955	851.805	127.6	852.174	116.276	852.71	100.815	852.494	93.8057	850.736	89.8741	850.824	86.9418	849.95	81.6064
	852.78	142.199	850.785	135.749	852.805	127.435	853.174	116.705	853.71	100.348	853.494	93.4697	851.736	90.1096	851.824	87.5123	850.95	81.4843
	853.78	141.725	851.785	136.159	853.805	128.532	854.174	115.653	854.71	101.677	854.494	94.996	852.736	89.6516	852.824	87.6119	851.95	81.9989
	854.78	141.398	852.785	135.337	854.805	127.64	855.174	116.57	855.71	99.6888	855.494	94.1707	853.736	89.5075	853.824	87.2411	852.95	80.5842
	855.78	141.424	853.785	135.75	855.805	127.451	856.174	116.367	856.71	100.805	856.494	94.0453	854.736	90.3812	854.824	87.4794	853.95	80.4457
	856.78	141.435	854.785	134.996	856.805	128.737	857.174	116.551	857.71	101.163	857.494	94.0446	855.736	90.6285	855.824	87.2528	854.95	81.0559
	857.78	142.449	855.785	136.454	857.805	127.85	858.174	116.634	858.71	100.352	858.494	93.9436	856.736	90.2513	856.824	87.8543	855.95	81.2622
	858.78	142.226	856.785	136.029	858.805	129.428	859.174	116.535	859.71	100.741	859.494	93.9953	857.736	90.6308	857.824	88.2812	856.95	82.1806
	859.78	142.493	857.785	136.051	859.805	128.132	860.174	116.413	860.71	100.881	860.494	93.9099	858.736	90.1342	858.824	87.476	857.95	81.4417
	860.78	141.464	858.785	134.231	860.805	128.233	861.174	116.398	861.71	101.109	861.494	93.6963	859.736	90.4496	859.824	87.0324	858.95	81.669
	861.78	141.186	859.785	135.723	861.805	128.07	862.174	117.073	862.71	101.183	862.494	94.3758	860.736	89.5043	860.824	87.4155	859.95	81.2378
	862.78	142.314	860.785	136.228	862.805	128.578	863.174	116.045	863.71	100.797	863.494	94.6457	861.736	90.673	861.824	87.7273	860.95	81.8477
	863.78	142.882	861.785	136.465	863.805	128.084	864.174	116.117	864.71	101.55	864.494	92.7944	862.736	90.422	862.824	86.5807	861.95	80.9986
	864.78	141.934	862.785	136.305	864.805	127.22	865.174	116.169	865.71	100.665	865.494	93.544	863.736	89.947	863.824	87.6834	862.95	81.628
	865.78	140.801	863.785	135.147	865.805	127.323	866.174	117.005	866.71	100.292	866.494	93.224	864.736	90.0193	864.824	88.2769	863.95	82.4095
	866.78	142.558	864.785	135.757	866.805	127.744	867.174	115.808	867.71	101.024	867.494	94.0047	865.736	90.7362	865.824	87.7064	864.95	82.2601
	867.78	141.529	865.785	135.336	867.805	127.948	868.174	116.753	868.71	100.78	868.494	93.691	866.736	89.5875	866.824	87.3583	865.95	82.0376
	868.78	141.893	866.785	136.295	868.805	128.335	869.174	116.843	869.71	101.044	869.494	94.0741	867.736	89.9938	867.824	87.2293	866.95	81.3707
	869.78	140.779	867.785	135.696	869.805	128.443	870.174	116.953	870.71	100.17	870.494	93.5083	868.736	90.648	868.824	86.7006	867.95	82.1168
	870.78	142	868.785	134.846	870.805	127.983	871.174	116.246	871.71	101.099	871.494	94.579	869.736	90.2006	869.824	88.1803	868.95	81.8517
	871.78	142.858	869.785	135.409	871.805	128.033	872.174	116.654	872.71	101.107	872.494	94.2707	870.736	90.7444	870.824	87.8393	869.95	81.3816
	872.78	141.497	870.785	136.572	872.805	127.521	873.174	116.506	873.71	100.653	873.494	93.6446	871.736	91.3369	871.824	87.4485	870.95	81.429
	873.78	141.982	871.785	136.299	873.805	126.522	874.174	117.262	874.71	101.428	874.494	93.4933	872.736	90.5759	872.824	86.995	871.95	81.8193
	874.78	142.115	872.785	136.556	874.805	129.129	875.174	117.253	875.71	100.953	875.494	94.5371	873.736	89.8767	873.824	86.5008	872.95	81.1633
	875.78	140.585	873.785	136.714	875.805	127.179	876.174	116.562	876.71	101.11	876.494	93.9538	874.736	90.2874	874.824	87.081	873.95	82.503
	876.78	141.485	874.785	137.585	876.805	127.344	877.174	117.376	877.71	101.865	877.494	93.4815	875.736	90.7635	875.824	87.5546	874.95	81.7063
	877.78	142.346	875.785	136.192	877.805	128.374	878.174	116.585	878.71	101.183	878.494	93.5543	876.736	90.5195	876.824	87.3091	875.95	80.9498
	878.78	141.437	876.785	136.828	878.805	128.657	879.174	116.97	879.71	100.871	879.494	94.826	877.736	90.7627	877.824	87.9429	876.95	82.1662
	879.78	142.429	877.785	137.234	879.805	127.79	880.174	116.345	880.71	101.256	880.494	94.2495	878.736	90.6257	878.824	87.8197	877.95	81.6472
	880.78	141.901	878.785	135.797	880.805	128.609	881.174	117.402	881.71	100.942	881.494	93.927	879.736	90.6755	879.824	87.8758	878.95	80.9641
	881.78	143.154	879.785	135.619	881.805	128.625	882.174	116.609	882.71	101.099	882.494	93.8758	880.736	90.1986	880.824	87.7462	879.95	82.2103
	882.78	141.282	880.785	136.245	882.805	128.501	883.174	117.654	883.71	101.639	883.494	94.6009	881.736	89.9116	881.824	87.4786	880.95	80.8647
	883.78	143.932	881.785	136.091	883.805	128.425	884.174	116.641	884.71	99.8654	884.494	93.5989	882.736	90.9467	882.824	88.0349	881.95	80.8378
	884.78	142.891	882.785	137.015	884.805	129.066	885.174	117.766	885.71	101.456	885.494	94.8251	883.736	89.6335	883.824	87.6642	882.95	82.1464
	885.78	141.771	883.785	135.548	885.805	128.375	886.174	117.26	886.71	100.372	886.494	94.5621	884.736	90.4734	884.824	87.6038	883.95	81.0565
	886.78	142.045	884.785	136.261	886.805	129.066	887.174	117.762	887.71	101.365	887.494	94.3434	885.736	90.1897	885.824	87.9803	884.95	83.0262
	887.78	142.636	885.785	137.189	887.805	127.501	888.174	117.132	888.71	101.663	888.494	93.8297	886.736	90.0156	886.824	87.2486	885.95	82.0591
	888.78	142.345	886.785	135.616	888.805	128.75	889.174	116.979	889.71	101.427	889.494	94.1764	887.736	90.3301	887.824	87.8587	886.95	81.3556
	889.78	143.144	887.785	136.43	889.805	129.478	890.174	117	890.71	100.188	890.494	94.1666	888.736	90.2981	888.824	87.6628	887.95	81.3779
	890.78	141.68	888.785	137.297	890.805	129.119	891.174	117.055	891.71	101.005	891.494	93.9863	889.736	90.4897	889.824	87.0552	888.95	81.7835
	891.78	143.089	889.785	137.336	891.805	128.533	892.174	117.155	892.71	102.516	892.494	94.0241	890.736	90.5229	890.824	88.0315	889.95	81.6819
	892.78	141.634	890.785	136.155	892.805	128.658	893.174	117.849	893.71	100.953	893.494	95.0584	891.736	89.7785	891.824	87.4186	890.95	81.4858
	893.78	143.265	891.785	136.983	893.805	129.67	894.174	117.399	894.71	101.617	894.494	93.9072	892.736	89.1607	892.824	88.1166	891.95	81.9294
	894.78	142.883	892.785	135.651	894.805	127.64	895.174	117.571	895.71	101.707	895.494	94.6717	893.736	88.8963	893.824	88.1781	892.95	81.832
	895.78	142.978	893.785	136.451	895.805	129.342	896.174	116.667	896.71	101.345	896.494	94.6932	894.736	90.6384	894.824	86.4918	893.95	81.9117
	896.78	142.055	894.785	137.073	896.805	128.416	897.174	116.273	897.71	100.527	897.494	93.9434	895.736	89.5909	895.824	87.8701	894.95	81.7949
	897.78	143.5	895.785	136.854	897.805	129.542	898.174	117.326	898.71	101.512	898.494	94.8327	896.736	90.6116	896.824	87.3805	895.95	80.7919
	898.78	142.984	896.785	136.62	898.805	128.685	899.174	118.865	899.71	101.308	899.494	95.0599	897.736	89.1113	897.824	87.7314	896.95	82.0855
	899.78	143.237	897.785	136.795	899.805	129.765	900.174	116.417	900.71	100.646	900.494	93.9887	898.736	90.2509	898.824	87.6682	897.95	81.6531
	900.78	143.325	898.785	136.655	900.805	129.479	901.174	117.619	901.71	101.328	901.494	94.1484	899.736	89.5402	899.824	88.0885	898.95	82.0346
	901.78	141.498	899.785	138.02	901.805	129.21	902.174	116.927	902.71	102.246	902.494	94.3663	900.736	88.6862	900.824	88.0432	899.95	82.2815
	902.78	143.472	900.785	137.59	902.805	128.925	903.174	117.465	903.71	101.52	903.494	93.8481	901.736	90.8115	901.824	87.1181	900.95	81.0362
	903.78	143.505	901.785	137.628	903.805	128.384	904.174	117.438	904.71	100.897	904.494	94.4491	902.736	89.9369	902.824	87.9232	901.95	81.1455
	904.78	143.214	902.785	136.439	904.805	129.715	905.174	117.371	905.71	101.682	905.494	94.5012	903.736	90.1708	903.824	88.5965	902.95	80.9944
	905.78	143.248	903.785	137.182	905.805	129.315	906.174	117.292	906.71	100.593	906.494	94.2992	904.736	90.2044	904.824	87.9641	903.95	81.2378
	906.78	142.709	904.785	136.936	906.805	129.909	907.174	117.261	907.71	101.781	907.494	95.7073	905.736	90.4834	905.824	88.4007	904.95	82.0765
	907.78	143.491	905.785	138.16	907.805	129.586	908.174	118.157	908.71	101.715	908.494	94.8192	906.736	90.3736	906.824	87.4866	905.95	82.3826
	908.78	142.432	906.785	137.787	908.805	129.622	909.174	117.425	909.71	101.941	909.494	93.7054	907.736	90.2283	907.824	88.613	906.95	81.9457
	909.78	143.858	907.785	136.802	909.805	129.109	910.174	116.403	910.71	100.822	910.494	94.867	908.736	89.7365	908.824	87.7769	907.95	81.303
	910.78	143.291	908.785	137.614	910.805	129.696	911.174	117.789	911.71	101.834	911.494	93.6507	909.736	89.491	909.824	87.3997	908.95	82.1503
	911.78	143.886	909.785	136.997	911.805	128.824	912.174	118.159	912.71	101.065	912.494	94.3096	910.736	89.7617	910.824	87.1648	909.95	80.6875
	912.78	143.631	910.785	137.937	912.805	129.611	913.174	117.492	913.71	100.689	913.494	94.3607	911.736	89.7138	911.824	87.5831	910.95	82.0612
	913.78	143.019	911.785	137.275	913.805	129.676	914.174	117.266	914.71	101.881	914.494	95.0332	912.736	90.6111	912.824	86.8424	911.95	82.0952
	914.78	144.084	912.785	137.838	914.805	129.558	915.174	118.013	915.71	100.779	915.494	93.5666	913.736	89.5626	913.824	87.5081	912.95	81.9521
	915.78	143.87	913.785	137.909	915.805	129.758	916.174	116.73	916.71	101.9	916.494	94.0966	914.736	90.4648	914.824	88.062	913.95	81.2808
	916.78	144.213	914.785	138.169	916.805	130.132	917.174	118.438	917.71	101.209	917.494	94.705	915.736	89.7672	915.824	87.548	914.95	82.0504
	917.78	144.721	915.785	137.256	917.805	129.605	918.174	118.243	918.71	102.447	918.494	95.0451	916.736	90.1799	916.824	87.3387	915.95	82.3455
	918.78	143.388	916.785	137.589	918.805	128.167	919.174	116.936	919.71	102.134	919.494	93.6887	917.736	90.5248	917.824	88.6559	916.95	81.5963
	919.78	143.198	917.785	137.543	919.805	129.107	920.174	117.753	920.71	101.926	920.494	93.9152	918.736	89.9864	918.824	87.6264	917.95	81.2457
	920.78	143.874	918.785	138.241	920.805	129.089	921.174	118.233	921.71	101.689	921.494	94.6294	919.736	90.2313	919.824	88.3859	918.95	81.1153
	921.78	143.974	919.785	137.798	921.805	129.078	922.174	118.527	922.71	101.864	922.494	94.9153	920.736	90.7392	920.824	87.8709	919.95	81.941
	922.78	144.305	920.785	138.349	922.805	129.729	923.174	117.203	923.71	102.255	923.494	94.0085	921.736	90.0695	921.824	88.193	920.95	82.7082
	923.78	143.986	921.785	138.835	923.805	130.418	924.174	118.138	924.71	101.83	924.494	94.3274	922.736	90.3727	922.824	88.2317	921.95	81.7041
	924.78	144.175	922.785	137.728	924.805	129.701	925.174	118.145	925.71	101.713	925.494	93.8431	923.736	90.7205	923.824	86.9577	922.95	81.886
	925.78	143.911	923.785	138.668	925.805	130.258	926.174	118.056	926.71	101.487	926.494	94.5042	924.736	90.7766	924.824	88.0072	923.95	81.3173
	926.78	143.54	924.785	138.439	926.805	129.72	927.174	117.287	927.71	102.169	927.494	94.7323	925.736	89.6199	925.824	87.3842	924.95	81.5809
	927.78	144.773	925.785	138.486	927.805	129.546	928.174	117.632	928.71	102.101	928.494	94.8581	926.736	90.6321	926.824	88.5987	925.95	82.6173
	928.78	144.55	926.785	137.332	928.805	131.351	929.174	117.727	929.71	102.003	929.494	94.6301	927.736	90.8553	927.824	87.0588	926.95	81.7763
	929.78	145.33	927.785	136.947	929.805	129.301	930.174	117.81	930.71	100.73	930.494	93.7003	928.736	91.4201	928.824	87.7015	927.95	81.6146
	930.78	144.403	928.785	138.174	930.805	130.822	931.174	118.237	931.71	102.346	931.494	95.0192	929.736	90.6968	929.824	87.0782	928.95	82.2268
	931.78	143.642	929.785	138.521	931.805	129.327	932.174	117.076	932.71	101.814	932.494	94.2809	930.736	89.7786	930.824	87.6094	929.95	81.5196
	932.78	145.276	930.785	139.609	932.805	129.817	933.174	119.068	933.71	101.312	933.494	95.1487	931.736	89.9043	931.824	87.8578	930.95	81.699
	933.78	145.332	931.785	137.578	933.805	130.81	934.174	117.435	934.71	101.948	934.494	94.3957	932.736	89.7777	932.824	88.4752	931.95	81.7136
	934.78	143.013	932.785	138.872	934.805	129.895	935.174	117.873	935.71	102.06	935.494	95.034	933.736	90.3139	933.824	88.4715	932.95	82.4783
	935.78	145.006	933.785	138.531	935.805	131.15	936.174	117.478	936.71	102.103	936.494	94.2338	934.736	89.9846	934.824	88.1386	933.95	82.3844
	936.78	144.503	934.785	138.319	936.805	131.312	937.174	118.035	937.71	102.07	937.494	93.7501	935.736	90.8249	935.824	87.8987	934.95	80.3357
	937.78	147.069	935.785	137.775	937.805	129.86	938.174	117.78	938.71	102.487	938.494	94.6686	936.736	90.2715	936.824	87.8919	935.95	81.6004
	938.78	144.127	936.785	138.352	938.805	130.447	939.174	117.563	939.71	102.011	939.494	94.2644	937.736	90.9417	937.824	87.6256	936.95	80.9624
	939.78	144.052	937.785	138.846	939.805	129.737	940.174	118.759	940.71	102.359	940.494	93.9903	938.736	90.1841	938.824	87.1958	937.95	82.1937
	940.78	144.328	938.785	139.298	940.805	130.679	941.174	117.814	941.71	101.756	941.494	93.6417	939.736	88.9286	939.824	87.3931	938.95	81.0754
	941.78	144.019	939.785	137.676	941.805	130.434	942.174	118.278	942.71	102.412	942.494	93.3749	940.736	91.0395	940.824	87.8398	939.95	81.6706
	942.78	145.142	940.785	138.944	942.805	131.174	943.174	118.145	943.71	101.679	943.494	94.6092	941.736	91.3733	941.824	87.4282	940.95	81.1566
	943.78	145.26	941.785	137.7	943.805	130.177	944.174	119.415	944.71	102.592	944.494	94.3892	942.736	90.4472	942.824	87.8296	941.95	82.102
	944.78	145.379	942.785	139.22	944.805	130.247	945.174	118.276	945.71	101.651	945.494	94.4981	943.736	90.6863	943.824	86.8812	942.95	81.4972
	945.78	144.327	943.785	138.606	945.805	130.103	946.174	119.566	946.71	102	946.494	94.4089	944.736	90.1982	944.824	88.115	943.95	80.6878
	946.78	145.692	944.785	138.975	946.805	129.868	947.174	118.683	947.71	102.241	947.494	93.4346	945.736	90.1381	945.824	87.5876	944.95	81.921
	947.78	143.367	945.785	137.952	947.805	130.57	948.174	118.736	948.71	101.982	948.494	94.3712	946.736	90.8074	946.824	87.5432	945.95	81.6864
	948.78	144.014	946.785	138.605	948.805	129.317	949.174	117.794	949.71	101.708	949.494	94.9071	947.736	91.1537	947.824	87.9755	946.95	81.9091
	949.78	145.412	947.785	139.703	949.805	130.652	950.174	118.117	950.71	100.976	950.494	95.5663	948.736	89.9896	948.824	87.5967	947.95	80.5846
	950.78	145.836	948.785	138.689	950.805	132.104	951.174	119.346	951.71	101.479	951.494	93.5576	949.736	90.941	949.824	87.1854	948.95	81.9366
	951.78	143.404	949.785	138.867	951.805	130.77	952.174	118.402	952.71	101.76	952.494	94.2357	950.736	89.9815	950.824	87.2122	949.95	82.0803
	952.78	145.05	950.785	138.3	952.805	129.651	953.174	118.556	953.71	102.305	953.494	93.5349	951.736	90.03	951.824	87.7843	950.95	82.6087
	953.78	145.931	951.785	139.022	953.805	130.866	954.174	118.653	954.71	101.94	954.494	93.2318	952.736	90.7886	952.824	88.371	951.95	81.0958
	954.78	145.721	952.785	139.365	954.805	130.667	955.174	118.13	955.71	101.554	955.494	95.1935	953.736	90.2077	953.824	88.2586	952.95	81.4354
	955.78	145.546	953.785	137.878	955.805	131.189	956.174	118.909	956.71	102.304	956.494	94.4289	954.736	90.3503	954.824	88.8152	953.95	81.4738
	956.78	145.627	954.785	138.415	956.805	131.473	957.174	119.671	957.71	102.695	957.494	94.0295	955.736	90.401	955.824	88.5851	954.95	81.6503
	957.78	146.027	955.785	138.082	957.805	131.395	958.174	118.954	958.71	101.716	958.494	94.5001	956.736	89.9576	956.824	87.567	955.95	81.9672
	958.78	145.751	956.785	138.971	958.805	130.616	959.174	120.183	959.71	103.474	959.494	94.0312	957.736	90.9539	957.824	88.3642	956.95	81.9077
	959.78	145.577	957.785	139.048	959.805	130.49	960.174	118.032	960.71	101.163	960.494	94.405	958.736	90.9135	958.824	87.6215	957.95	81.663
	960.78	145.375	958.785	139.099	960.805	130.465	961.174	118.09	961.71	101.415	961.494	93.6837	959.736	90.5678	959.824	87.8869	958.95	81.1111
	961.78	145.841	959.785	139.035	961.805	131.052	962.174	118.291	962.71	101.34	962.494	94.2477	960.736	90.8499	960.824	88.6268	959.95	82.4969
	962.78	146.012	960.785	138.77	962.805	132.155	963.174	119.151	963.71	102.367	963.494	94.4905	961.736	88.9162	961.824	88.9486	960.95	81.3674
	963.78	146.086	961.785	139.887	963.805	131.634	964.174	118.976	964.71	102.48	964.494	94.481	962.736	91.1826	962.824	87.6434	961.95	81.2618
	964.78	145.966	962.785	139.2	964.805	131.327	965.174	119.325	965.71	101.428	965.494	93.15	963.736	90.6985	963.824	87.3497	962.95	81.0227
	965.78	146.698	963.785	139.074	965.805	131.269	966.174	118.61	966.71	102.582	966.494	93.7422	964.736	90.6797	964.824	88.0071	963.95	81.5908
	966.78	145.584	964.785	138.465	966.805	131.87	967.174	117.607	967.71	103.497	967.494	94.4042	965.736	89.903	965.824	87.1397	964.95	82.4682
	967.78	145.659	965.785	139.443	967.805	131.478	968.174	118.189	968.71	101.679	968.494	95.4831	966.736	90.3246	966.824	87.4007	965.95	81.5821
	968.78	146.012	966.785	139.866	968.805	131.56	969.174	119.14	969.71	100.831	969.494	93.5429	967.736	90.5904	967.824	88.0594	966.95	81.3019
	969.78	145.867	967.785	138.954	969.805	131.945	970.174	118.721	970.71	101.991	970.494	94.8312	968.736	91.12	968.824	87.3387	967.95	81.4957
	970.78	145.243	968.785	139.096	970.805	132.465	971.174	118.496	971.71	102.335	971.494	94.7556	969.736	90.2109	969.824	87.2796	968.95	81.1556
	971.78	146.827	969.785	139.597	971.805	132.123	972.174	118.367	972.71	103.229	972.494	94.3403	970.736	91.8786	970.824	88.1197	969.95	81.914
	972.78	144.883	970.785	139.451	972.805	130.377	973.174	119.352	973.71	101.763	973.494	95.5012	971.736	90.2759	971.824	87.4829	970.95	81.0552
	973.78	145.856	971.785	138.538	973.805	131.192	974.174	118.451	974.71	101.941	974.494	94.4063	972.736	89.733	972.824	87.1393	971.95	82.5731
	974.78	145.239	972.785	138.917	974.805	131.595	975.174	119.538	975.71	102.271	975.494	94.4131	973.736	89.9385	973.824	87.7082	972.95	81.3648
	975.78	145.781	973.785	138.275	975.805	130.821	976.174	118.77	976.71	101.383	976.494	95.2038	974.736	91.2917	974.824	88.3571	973.95	81.4182
	976.78	146.705	974.785	139.958	976.805	131.631	977.174	118.816	977.71	102.018	977.494	94.6485	975.736	90.6573	975.824	88.0534	974.95	82.9938
	977.78	146.418	975.785	138.989	977.805	132.198	978.174	118.715	978.71	101.706	978.494	94.2489	976.736	90.2574	976.824	87.5534	975.95	80.8157
	978.78	146.975	976.785	139.974	978.805	132.329	979.174	119.404	979.71	102.14	979.494	94.8479	977.736	90.834	977.824	87.4161	976.95	81.8775
	979.78	147.226	977.785	139.668	979.805	132.811	980.174	118.797	980.71	102.605	980.494	94.6349	978.736	90.3365	978.824	87.5867	977.95	82.0717
	980.78	145.936	978.785	139.512	980.805	132.366	981.174	119.34	981.71	103.549	981.494	95.8313	979.736	89.7821	979.824	87.1738	978.95	82.2853
	981.78	147.06	979.785	140.616	981.805	132.595	982.174	119.97	982.71	101.38	982.494	94.762	980.736	89.7873	980.824	87.9221	979.95	81.222
	982.78	146.719	980.785	139.555	982.805	131.735	983.174	119.174	983.71	103.343	983.494	94.2242	981.736	90.1717	981.824	88.4468	980.95	81.5948
	983.78	146.55	981.785	140.272	983.805	131.783	984.174	119.82	984.71	101.915	984.494	94.2078	982.736	90.1322	982.824	86.9872	981.95	81.9422
	984.78	147.351	982.785	140.29	984.805	132.181	985.174	118.976	985.71	102.794	985.494	93.6808	983.736	90.2412	983.824	88.2585	982.95	81.8305
	985.78	146.968	983.785	139.382	985.805	131.563	986.174	119.949	986.71	103.63	986.494	93.4215	984.736	90.141	984.824	88.1772	983.95	82.201
	986.78	146.537	984.785	139.415	986.805	131.814	987.174	119.02	987.71	103.185	987.494	93.9691	985.736	90.5042	985.824	87.2509	984.95	82.044
	987.78	147.23	985.785	140.075	987.805	131.383	988.174	118.965	988.71	102.159	988.494	94.7914	986.736	91.1666	986.824	87.6719	985.95	82.0006
	988.78	146.538	986.785	139.921	988.805	132.056	989.174	119.454	989.71	102.099	989.494	94.4135	987.736	91.0318	987.824	88.1176	986.95	81.7698
	989.78	145.886	987.785	140.186	989.805	131.404	990.174	119.563	990.71	102.024	990.494	95.259	988.736	91.1921	988.824	87.6742	987.95	82.1929
	990.78	146.702	988.785	139.589	990.805	132.498	991.174	119.29	991.71	102.427	991.494	94.6331	989.736	90.9956	989.824	88.4417	988.95	81.4471
	991.78	147.453	989.785	140.143	991.805	132.012	992.174	119.53	992.71	102.746	992.494	94.012	990.736	90.9916	990.824	88.4343	989.95	81.2704
	992.78	145.96	990.785	138.972	992.805	133.361	993.174	118.927	993.71	103.025	993.494	94.4394	991.736	89.9849	991.824	88.4953	990.95	81.0418
	993.78	147.007	991.785	141.12	993.805	132.04	994.174	119.688	994.71	102.449	994.494	93.5177	992.736	90.2648	992.824	88.4093	991.95	81.6355
	994.78	146.897	992.785	139.515	994.805	132.568	995.174	120.075	995.71	102.801	995.494	93.5088	993.736	90.4571	993.824	88.4239	992.95	81.169
	995.78	146.851	993.785	140.689	995.805	132.16	996.174	119.551	996.71	102.642	996.494	94.6348	994.736	90.9981	994.824	87.4469	993.95	81.8545
	996.78	148.06	994.785	139.956	996.805	131.344	997.174	118.662	997.71	101.692	997.494	93.4809	995.736	89.4936	995.824	87.444	994.95	81.9493
	997.78	147.548	995.785	138.829	997.805	130.948	998.174	118.901	998.71	102.05	998.494	94.7976	996.736	90.348	996.824	88.3104	995.95	80.4872
	998.78	146.6	996.785	139.428	998.805	131.46	999.174	118.981	999.71	102.382	999.494	94.6824	997.736	90.0612	997.824	86.9527	996.95	82.0597
	999.78	147.374	997.785	140.815	999.805	132.878	1000.17	119.692	1000.71	103.005	1000.49	95.2294	998.736	91.1649	998.824	87.6764	997.95	82.1636
	1000.78	146.528	998.785	140.756	1000.8	132.434	1001.17	120.027	1001.71	101.52	1001.49	94.2794	999.736	90.8847	999.824	87.9578	998.95	81.6495
	1001.78	146.313	999.785	140.412	1001.8	133.021	1002.17	120.266	1002.71	102.421	1002.49	95.3843	1000.74	90.2471	1000.82	87.8864	999.95	81.6518
	1002.78	147.379	1000.79	139.024	1002.8	133.124	1003.17	120.243	1003.71	102.38	1003.49	94.9667	1001.74	89.6045	1001.82	87.9069	1000.95	81.8672
	1003.78	147.025	1001.79	141.06	1003.8	132.161	1004.17	119.848	1004.71	101.772	1004.49	94.8487	1002.74	90.3041	1002.82	87.9675	1001.95	81.45
	1004.78	147.038	1002.79	140.022	1004.8	131.93	1005.17	119.87	1005.71	103.162	1005.49	94.0754	1003.74	90.9196	1003.82	87.4956	1002.95	81.8091
	1005.78	147.802	1003.79	141.092	1005.8	133.367	1006.17	119.772	1006.71	102.927	1006.49	93.489	1004.74	91.3917	1004.82	88.4026	1003.95	81.8848
	1006.78	147.185	1004.79	140.332	1006.8	133.236	1007.17	119.468	1007.71	102.017	1007.49	94.5645	1005.74	89.7014	1005.82	88.1958	1004.95	82.4741
	1007.78	147.382	1005.79	140.383	1007.8	132.633	1008.17	119.279	1008.71	102.169	1008.49	94.7233	1006.74	90.6961	1006.82	88.1164	1005.95	81.7246
	1008.78	148.072	1006.79	140.212	1008.8	131.378	1009.17	120.177	1009.71	102.259	1009.49	94.2364	1007.74	90.7545	1007.82	87.2726	1006.95	81.2646
	1009.78	146.152	1007.79	140.633	1009.8	132.848	1010.17	119.909	1010.71	102.353	1010.49	93.8198	1008.74	91.1574	1008.82	88.484	1007.95	82.4773
	1010.78	147.582	1008.79	140.502	1010.8	132.632	1011.17	119.053	1011.71	102.452	1011.49	94.2751	1009.74	91.0864	1009.82	88.7791	1008.95	81.0624
	1011.78	147.922	1009.79	141.922	1011.8	131.539	1012.17	120.281	1012.71	102.172	1012.49	94.5431	1010.74	90.4594	1010.82	88.0774	1009.95	81.7024
	1012.78	147.237	1010.79	140.369	1012.8	133.639	1013.17	119.745	1013.71	102.546	1013.49	93.2972	1011.74	90.6399	1011.82	88.0829	1010.95	81.9887
	1013.78	148.085	1011.79	140.163	1013.8	132.942	1014.17	120.138	1014.71	102.626	1014.49	94.8484	1012.74	90.5337	1012.82	88.2692	1011.95	81.4314
	1014.78	148.582	1012.79	139.524	1014.8	133.015	1015.17	120.38	1015.71	102.518	1015.49	93.7184	1013.74	90.6138	1013.82	87.4619	1012.95	81.4347
	1015.78	146.932	1013.79	141.112	1015.8	133.315	1016.17	119.459	1016.71	103.231	1016.49	94.0159	1014.74	90.6302	1014.82	87.7336	1013.95	81.9092
	1016.78	147.585	1014.79	139.487	1016.8	132.551	1017.17	119.783	1017.71	102.323	1017.49	94.6248	1015.74	90.4535	1015.82	88.0764	1014.95	81.827
	1017.78	147.787	1015.79	140.029	1017.8	133.868	1018.17	119.159	1018.71	103.283	1018.49	94.7038	1016.74	89.8542	1016.82	87.7809	1015.95	81.3709
	1018.78	147.521	1016.79	140.038	1018.8	133.521	1019.17	119.86	1019.71	102.944	1019.49	95.2749	1017.74	90.6603	1017.82	88.5112	1016.95	81.9206
	1019.78	148.452	1017.79	140.515	1019.8	132.195	1020.17	119.684	1020.71	103.081	1020.49	94.8077	1018.74	89.5843	1018.82	87.8667	1017.95	81.6891
	1020.78	147.857	1018.79	140.16	1020.8	132.669	1021.17	119.992	1021.71	103.606	1021.49	94.8751	1019.74	90.7934	1019.82	87.4359	1018.95	82.0947
	1021.78	148.962	1019.79	139.995	1021.8	133.074	1022.17	120.503	1022.71	102.334	1022.49	95.1399	1020.74	90.0156	1020.82	88.4346	1019.95	81.8391
	1022.78	148.281	1020.79	140.824	1022.8	132.079	1023.17	120.132	1023.71	102.417	1023.49	95.4267	1021.74	90.0978	1021.82	88.0253	1020.95	81.3761
	1023.78	147.832	1021.79	140.925	1023.8	132.811	1024.17	120.298	1024.71	102.536	1024.49	94.2763	1022.74	91.0569	1022.82	87.4962	1021.95	81.1011
	1024.78	148.417	1022.79	139.955	1024.8	133.173	1025.17	119.64	1025.71	101.62	1025.49	94.6173	1023.74	89.6539	1023.82	88.1379	1022.95	81.4033
	1025.78	147.476	1023.79	140.728	1025.8	132.725	1026.17	118.457	1026.71	102.683	1026.49	95.0188	1024.74	91.3201	1024.82	88.18	1023.95	82.1382
	1026.78	146.329	1024.79	141.425	1026.8	133.206	1027.17	119.592	1027.71	102.969	1027.49	94.1606	1025.74	90.8387	1025.82	87.7785	1024.95	81.6867
	1027.78	148.397	1025.79	141.005	1027.8	133.389	1028.17	121.133	1028.71	103.457	1028.49	93.9486	1026.74	90.0818	1026.82	87.5589	1025.95	81.0419
	1028.78	148.822	1026.79	140.672	1028.8	133.177	1029.17	119.606	1029.71	102.961	1029.49	93.7986	1027.74	90.1082	1027.82	88.1944	1026.95	81.6258
	1029.78	148.091	1027.79	141.416	1029.8	132.676	1030.17	120.644	1030.71	103.102	1030.49	94.7287	1028.74	89.5402	1028.82	87.7686	1027.95	81.1433
	1030.78	146.524	1028.79	141.319	1030.8	133.43	1031.17	119.999	1031.71	102.558	1031.49	94.5818	1029.74	90.5721	1029.82	88.2904	1028.95	81.7654
	1031.78	148.626	1029.79	141.439	1031.8	132.476	1032.17	119.886	1032.71	103.127	1032.49	95.4292	1030.74	90.1414	1030.82	87.4094	1029.95	81.1416
	1032.78	148.574	1030.79	141.855	1032.8	133.354	1033.17	120.809	1033.71	102.809	1033.49	93.9385	1031.74	90.898	1031.82	87.6119	1030.95	82.2589
	1033.78	147.631	1031.79	141.163	1033.8	134.843	1034.17	120.384	1034.71	102.614	1034.49	95.0933	1032.74	90.6274	1032.82	87.862	1031.95	81.6048
	1034.78	147.834	1032.79	141.395	1034.8	132.444	1035.17	120.955	1035.71	103.062	1035.49	94.7942	1033.74	91.6239	1033.82	88.1875	1032.95	81.9805
	1035.78	148.298	1033.79	141.889	1035.8	132.823	1036.17	120.412	1036.71	102.802	1036.49	93.9298	1034.74	89.9221	1034.82	86.6234	1033.95	82.3248
	1036.78	148.921	1034.79	141.473	1036.8	133.685	1037.17	121.071	1037.71	103.421	1037.49	94.7601	1035.74	90.6667	1035.82	88.3433	1034.95	81.059
	1037.78	147.752	1035.79	141.209	1037.8	134.182	1038.17	120.928	1038.71	101.716	1038.49	94.57	1036.74	91.0948	1036.82	88.1082	1035.95	81.5797
	1038.78	147.727	1036.79	140.673	1038.8	132.442	1039.17	120.592	1039.71	102.355	1039.49	94.7431	1037.74	90.6904	1037.82	88.3921	1036.95	81.3605
	1039.78	148.861	1037.79	140.918	1039.8	132.411	1040.17	120.294	1040.71	102.301	1040.49	94.3644	1038.74	91.3374	1038.82	87.8199	1037.95	81.1646
	1040.78	149.078	1038.79	142.604	1040.8	133.932	1041.17	121.346	1041.71	103.01	1041.49	94.9051	1039.74	91.7711	1039.82	87.5147	1038.95	81.826
	1041.78	148.555	1039.79	141.446	1041.8	132.143	1042.17	120.468	1042.71	102.845	1042.49	94.4118	1040.74	90.3119	1040.82	88.1533	1039.95	81.121
	1042.78	149.055	1040.79	141.352	1042.8	134.057	1043.17	121.426	1043.71	102.674	1043.49	94.0831	1041.74	90.8273	1041.82	87.8139	1040.95	81.7838
	1043.78	149.429	1041.79	141.72	1043.8	132.42	1044.17	119.929	1044.71	103.146	1044.49	95.1462	1042.74	90.509	1042.82	88.0367	1041.95	81.5374
	1044.78	149.525	1042.79	142.613	1044.8	132.444	1045.17	120.526	1045.71	103.245	1045.49	93.9581	1043.74	90.2011	1043.82	88.2656	1042.95	80.9506
	1045.78	147.756	1043.79	140.15	1045.8	133.411	1046.17	120.39	1046.71	102.66	1046.49	94.4964	1044.74	90.9644	1044.82	87.9338	1043.95	81.5522
	1046.78	148.478	1044.79	141.997	1046.8	134.034	1047.17	120.968	1047.71	102.985	1047.49	95.1791	1045.74	91.0886	1045.82	87.3901	1044.95	81.8971
	1047.78	148.649	1045.79	141.403	1047.8	133.477	1048.17	120.72	1048.71	103.326	1048.49	95.4705	1046.74	91.3408	1046.82	87.8507	1045.95	81.6069
	1048.78	149.224	1046.79	142.514	1048.8	133.589	1049.17	120.032	1049.71	103.174	1049.49	94.8747	1047.74	90.5209	1047.82	87.7513	1046.95	83.0011
	1049.78	148.998	1047.79	141.804	1049.8	135.169	1050.17	119.812	1050.71	103.178	1050.49	94.9594	1048.74	90.4519	1048.82	88.097	1047.95	82.2641
	1050.78	148.156	1048.79	142.453	1050.8	133.109	1051.17	120.958	1051.71	103.228	1051.49	95.318	1049.74	91.6123	1049.82	87.446	1048.95	81.429
	1051.78	149.142	1049.79	141.491	1051.8	134.549	1052.17	121.362	1052.71	103.198	1052.49	94.9382	1050.74	90.7338	1050.82	88.1719	1049.95	81.8558
	1052.78	149.509	1050.79	141.66	1052.8	132.519	1053.17	120.692	1053.71	102.9	1053.49	94.1107	1051.74	91.0512	1051.82	88.7503	1050.95	81.9066
	1053.78	149.105	1051.79	141.214	1053.8	134.633	1054.17	120.696	1054.71	102.642	1054.49	94.53	1052.74	91.2757	1052.82	87.9914	1051.95	82.2187
	1054.78	149.602	1052.79	142.154	1054.8	132.952	1055.17	120.084	1055.71	102.705	1055.49	95.2828	1053.74	91.028	1053.82	88.0523	1052.95	82.2104
	1055.78	149.23	1053.79	141.171	1055.8	134.302	1056.17	121.012	1056.71	103.786	1056.49	94.4788	1054.74	90.7407	1054.82	88.6034	1053.95	82.6786
	1056.78	149.565	1054.79	141.184	1056.8	133.25	1057.17	121.138	1057.71	103.502	1057.49	94.2765	1055.74	90.0061	1055.82	87.0269	1054.95	81.3694
	1057.78	148.571	1055.79	142.175	1057.8	135.401	1058.17	121.174	1058.71	102.085	1058.49	94.6967	1056.74	90.1698	1056.82	87.8701	1055.95	82.5876
	1058.78	149.304	1056.79	141.51	1058.8	134.304	1059.17	121.285	1059.71	103.015	1059.49	94.7206	1057.74	90.3615	1057.82	87.873	1056.95	81.993
	1059.78	148.099	1057.79	142.608	1059.8	133.815	1060.17	119.909	1060.71	103.011	1060.49	94.0122	1058.74	89.8969	1058.82	89.1379	1057.95	81.7082
	1060.78	147.804	1058.79	141.965	1060.8	134.311	1061.17	121.185	1061.71	103.198	1061.49	94.3578	1059.74	91.2447	1059.82	88.5448	1058.95	83.1082
	1061.78	149.03	1059.79	140.996	1061.8	134.897	1062.17	122.211	1062.71	102.897	1062.49	94.6206	1060.74	89.9684	1060.82	88.0701	1059.95	82.0365
	1062.78	150.743	1060.79	142.095	1062.8	133.537	1063.17	121.444	1063.71	103.353	1063.49	93.9544	1061.74	90.5381	1061.82	88.5155	1060.95	82.4938
	1063.78	149.156	1061.79	141.585	1063.8	133.613	1064.17	120.27	1064.71	102.573	1064.49	94.7886	1062.74	91.0301	1062.82	88.1424	1061.95	82.0041
	1064.78	149.018	1062.79	142.421	1064.8	134.537	1065.17	120.711	1065.71	103.441	1065.49	94.4342	1063.74	90.0973	1063.82	87.4353	1062.95	81.6448
	1065.78	149.815	1063.79	142.165	1065.8	134.678	1066.17	121.298	1066.71	103.259	1066.49	94.4512	1064.74	91.1457	1064.82	87.7891	1063.95	81.5554
	1066.78	150.55	1064.79	142.847	1066.8	134.31	1067.17	120.585	1067.71	102.787	1067.49	95.0149	1065.74	89.9457	1065.82	88.6598	1064.95	81.744
	1067.78	149.448	1065.79	141.436	1067.8	134.1	1068.17	120.921	1068.71	103.885	1068.49	93.908	1066.74	90.5455	1066.82	88.0525	1065.95	81.3521
	1068.78	149.462	1066.79	141.858	1068.8	135.009	1069.17	121.516	1069.71	103.054	1069.49	94.7911	1067.74	89.9579	1067.82	87.4746	1066.95	82.374
	1069.78	150.597	1067.79	141.792	1069.8	133.803	1070.17	120.312	1070.71	103.273	1070.49	96.1486	1068.74	90.8393	1068.82	87.5313	1067.95	81.9542
	1070.78	149.146	1068.79	142.304	1070.8	134.215	1071.17	120.172	1071.71	102.32	1071.49	94.4178	1069.74	90.1994	1069.82	87.6491	1068.95	81.7152
	1071.78	147.972	1069.79	140.934	1071.8	134.241	1072.17	121.172	1072.71	102.677	1072.49	94.8642	1070.74	90.3602	1070.82	87.7701	1069.95	81.7818
	1072.78	148.737	1070.79	141.921	1072.8	135.06	1073.17	121.928	1073.71	104.603	1073.49	94.4935	1071.74	89.6836	1071.82	87.805	1070.95	81.453
	1073.78	149.765	1071.79	142.573	1073.8	134.539	1074.17	122.154	1074.71	102.379	1074.49	96.0439	1072.74	90.7303	1072.82	88.2145	1071.95	81.2858
	1074.78	149.036	1072.79	143.063	1074.8	134.241	1075.17	121.098	1075.71	104.054	1075.49	94.2919	1073.74	90.4367	1073.82	89.2029	1072.95	82.1689
	1075.78	150.186	1073.79	141.794	1075.8	133.63	1076.17	122.178	1076.71	102.986	1076.49	94.0998	1074.74	91.0126	1074.82	88.9341	1073.95	81.8624
	1076.78	149.44	1074.79	141.881	1076.8	134.318	1077.17	122.023	1077.71	102.935	1077.49	94.2907	1075.74	90.5009	1075.82	88.1215	1074.95	82.4224
	1077.78	150.209	1075.79	141.633	1077.8	134.869	1078.17	121.06	1078.71	103.145	1078.49	94.4298	1076.74	90.6251	1076.82	87.502	1075.95	81.8905
	1078.78	150.279	1076.79	143.466	1078.8	134.937	1079.17	121.536	1079.71	102.72	1079.49	95.3949	1077.74	91.6737	1077.82	87.5531	1076.95	82.0873
	1079.78	150.167	1077.79	142.251	1079.8	133.515	1080.17	122.558	1080.71	103.038	1080.49	93.8994	1078.74	91.3633	1078.82	89.0486	1077.95	81.8507
	1080.78	150.333	1078.79	142.221	1080.8	134.582	1081.17	120.57	1081.71	104.311	1081.49	94.9546	1079.74	90.5073	1079.82	87.7623	1078.95	82.9364
	1081.78	149.456	1079.79	143.651	1081.8	134.455	1082.17	120.172	1082.71	103.797	1082.49	95.1922	1080.74	91.3238	1080.82	87.9692	1079.95	82.4586
	1082.78	150.205	1080.79	142.623	1082.8	133.954	1083.17	122.458	1083.71	103.42	1083.49	95.1044	1081.74	89.6039	1081.82	87.8632	1080.95	81.5347
	1083.78	149.506	1081.79	142.557	1083.8	135.726	1084.17	121.251	1084.71	103.36	1084.49	94.3184	1082.74	90.0072	1082.82	87.7754	1081.95	81.6333
	1084.78	149.696	1082.79	141.051	1084.8	135.696	1085.17	122.101	1085.71	103.128	1085.49	95.29	1083.74	90.7763	1083.82	88.571	1082.95	81.8881
	1085.78	149.589	1083.79	140.975	1085.8	135.515	1086.17	121.299	1086.71	104.474	1086.49	95.4345	1084.74	91.5326	1084.82	87.7279	1083.95	82.7755
	1086.78	149.609	1084.79	141.011	1086.8	134.957	1087.17	122.138	1087.71	103.213	1087.49	94.1377	1085.74	90.4553	1085.82	88.589	1084.95	82.0063
	1087.78	150.059	1085.79	142.701	1087.8	135.849	1088.17	120.143	1088.71	103.227	1088.49	94.8863	1086.74	90.5834	1086.82	87.479	1085.95	81.4323
	1088.78	149.976	1086.79	143.162	1088.8	133.621	1089.17	122.182	1089.71	102.98	1089.49	93.5983	1087.74	90.4391	1087.82	87.8263	1086.95	81.5886
	1089.78	150.283	1087.79	142.779	1089.8	135.046	1090.17	121.994	1090.71	103.101	1090.49	93.3482	1088.74	91.2433	1088.82	88.8385	1087.95	81.5873
	1090.78	150.045	1088.79	143.374	1090.8	134.861	1091.17	121.028	1091.71	103.117	1091.49	94.4088	1089.74	90.8807	1089.82	88.1905	1088.95	82.3762
	1091.78	150.748	1089.79	141.862	1091.8	135.628	1092.17	121.187	1092.71	103.769	1092.49	94.7745	1090.74	90.3357	1090.82	86.2669	1089.95	82.669
	1092.78	150.22	1090.79	142.998	1092.8	135.519	1093.17	121.287	1093.71	103.397	1093.49	94.0355	1091.74	90.3923	1091.82	87.5026	1090.95	81.709
	1093.78	149.332	1091.79	143.156	1093.8	135.819	1094.17	121.295	1094.71	103.882	1094.49	94.8316	1092.74	90.9416	1092.82	87.9469	1091.95	81.7293
	1094.78	149.986	1092.79	141.951	1094.8	135.263	1095.17	120.945	1095.71	103.859	1095.49	94.0398	1093.74	91.5203	1093.82	88.0406	1092.95	82.3028
	1095.78	149.24	1093.79	143.1	1095.8	133.901	1096.17	122.065	1096.71	104.331	1096.49	93.9695	1094.74	90.5818	1094.82	89.1999	1093.95	81.5219
	1096.78	151.449	1094.79	142.352	1096.8	135.876	1097.17	120.582	1097.71	102.583	1097.49	93.8647	1095.74	90.5321	1095.82	87.438	1094.95	81.4474
	1097.78	149.581	1095.79	142.31	1097.8	135.559	1098.17	121.771	1098.71	103.073	1098.49	94.7531	1096.74	90.4245	1096.82	87.937	1095.95	82.0059
	1098.78	150.798	1096.79	141.737	1098.8	135.547	1099.17	122.957	1099.71	104.186	1099.49	94.3783	1097.74	90.3753	1097.82	88.0778	1096.95	81.8277
	1099.78	150.006	1097.79	142.197	1099.8	136.132	1100.17	121.106	1100.71	102.635	1100.49	94.5214	1098.74	90.7021	1098.82	87.9452	1097.95	82.0892
	1100.78	151.169	1098.79	143.144	1100.8	134.699	1101.17	122.234	1101.71	104.51	1101.49	94.7691	1099.74	91.2528	1099.82	88.7847	1098.95	81.0135
	1101.78	151.182	1099.79	141.928	1101.8	134.721	1102.17	121.864	1102.71	103.492	1102.49	94.7554	1100.74	90.6966	1100.82	88.8417	1099.95	82.0348
	1102.78	151.034	1100.79	141.332	1102.8	134.414	1103.17	122.092	1103.71	103.723	1103.49	94.3613	1101.74	91.056	1101.82	88.4614	1100.95	81.8704
	1103.78	150.196	1101.79	143.236	1103.8	133.849	1104.17	121.754	1104.71	101.968	1104.49	95.1666	1102.74	90.2573	1102.82	87.9173	1101.95	82.4379
	1104.78	149.905	1102.79	142.147	1104.8	136.179	1105.17	122.482	1105.71	103.433	1105.49	95.1999	1103.74	89.9616	1103.82	88.7591	1102.95	81.0872
	1105.78	150.13	1103.79	141.353	1105.8	136.038	1106.17	122.245	1106.71	103.556	1106.49	95.5463	1104.74	91.0151	1104.82	88.3123	1103.95	81.9302
	1106.78	150.158	1104.79	143.211	1106.8	134.736	1107.17	122.632	1107.71	103.396	1107.49	95.0392	1105.74	91.1603	1105.82	87.1855	1104.95	81.5035
	1107.78	150.931	1105.79	143.19	1107.8	136.115	1108.17	121.73	1108.71	104.134	1108.49	93.8929	1106.74	90.6226	1106.82	87.9354	1105.95	81.6784
	1108.78	151.344	1106.79	143.808	1108.8	134.671	1109.17	122.663	1109.71	103.893	1109.49	95.5929	1107.74	90.6674	1107.82	88.6306	1106.95	81.7825
	1109.78	151.051	1107.79	141.883	1109.8	135.118	1110.17	122.584	1110.71	104.164	1110.49	95.0358	1108.74	90.3705	1108.82	88.3089	1107.95	80.4978
	1110.78	150.365	1108.79	143.031	1110.8	135.741	1111.17	122.851	1111.71	104.086	1111.49	95.4302	1109.74	90.652	1109.82	87.8044	1108.95	81.1699
	1111.78	151.79	1109.79	143.835	1111.8	136.6	1112.17	122.593	1112.71	103.39	1112.49	95.8418	1110.74	90.1328	1110.82	87.941	1109.95	82.581
	1112.78	151.001	1110.79	143.078	1112.8	136.478	1113.17	121.954	1113.71	104.009	1113.49	95.3417	1111.74	90.7555	1111.82	87.0274	1110.95	81.6061
	1113.78	150.238	1111.79	142.455	1113.8	135.854	1114.17	122.325	1114.71	102.769	1114.49	95.5584	1112.74	90.701	1112.82	88.4707	1111.95	81.8047
	1114.78	150.916	1112.79	143.969	1114.8	134.988	1115.17	122.146	1115.71	103.545	1115.49	94.5193	1113.74	91.4003	1113.82	88.5087	1112.95	81.3962
	1115.78	151.394	1113.79	142.518	1115.8	135.759	1116.17	121.582	1116.71	103.341	1116.49	95.2495	1114.74	91.1812	1114.82	87.4971	1113.95	82.6269
	1116.78	150.677	1114.79	141.99	1116.8	136.111	1117.17	122.052	1117.71	103.719	1117.49	95.4418	1115.74	90.9222	1115.82	88.5154	1114.95	81.5385
	1117.78	151.098	1115.79	142.745	1117.8	135.365	1118.17	121.815	1118.71	105.215	1118.49	95.486	1116.74	90.4664	1116.82	88.2385	1115.95	80.3159
	1118.78	151.122	1116.79	143.08	1118.8	136.27	1119.17	122.426	1119.71	103.308	1119.49	94.577	1117.74	91.3574	1117.82	88.5014	1116.95	81.9341
	1119.78	151.336	1117.79	142.973	1119.8	136.211	1120.17	121.585	1120.71	103.532	1120.49	94.19	1118.74	90.612	1118.82	87.3906	1117.95	81.6259
	1120.78	150.794	1118.79	142.995	1120.8	134.698	1121.17	122.931	1121.71	103.545	1121.49	95.013	1119.74	89.8207	1119.82	87.8502	1118.95	82.1159
	1121.78	152.418	1119.79	143.319	1121.8	136.23	1122.17	122.351	1122.71	104.587	1122.49	94.15	1120.74	91.3337	1120.82	88.2623	1119.95	81.832
	1122.78	152.125	1120.79	143.18	1122.8	135.567	1123.17	122.05	1123.71	103.239	1123.49	95.2504	1121.74	91.0786	1121.82	88.3694	1120.95	82.0492
	1123.78	150.616	1121.79	144.326	1123.8	137.163	1124.17	122.018	1124.71	104.026	1124.49	93.6771	1122.74	91.0443	1122.82	88.9273	1121.95	81.4844
	1124.78	151.447	1122.79	142.51	1124.8	135.192	1125.17	122.118	1125.71	103.661	1125.49	94.9688	1123.74	91.4334	1123.82	87.8513	1122.95	82.0047
	1125.78	150.643	1123.79	143.461	1125.8	135.399	1126.17	122.72	1126.71	104.416	1126.49	94.7783	1124.74	90.3663	1124.82	88.054	1123.95	81.7802
	1126.78	150.822	1124.79	142.988	1126.8	136.526	1127.17	123.027	1127.71	104.12	1127.49	94.6324	1125.74	91.0452	1125.82	88.6281	1124.95	82.0938
	1127.78	151.371	1125.79	144.316	1127.8	137.594	1128.17	121.86	1128.71	103.716	1128.49	94.8383	1126.74	91.1373	1126.82	88.1136	1125.95	81.2758
	1128.78	150.113	1126.79	142.702	1128.8	135.907	1129.17	122.793	1129.71	103.548	1129.49	94.6922	1127.74	89.8989	1127.82	88.4499	1126.95	81.4781
	1129.78	152.142	1127.79	143.478	1129.8	135.138	1130.17	122.852	1130.71	104	1130.49	94.3249	1128.74	91.0555	1128.82	88.3524	1127.95	81.9532
	1130.78	151.566	1128.79	142.526	1130.8	135.497	1131.17	122.46	1131.71	103.215	1131.49	95.3643	1129.74	91.9699	1129.82	89.041	1128.95	81.6262
	1131.78	152.12	1129.79	143.314	1131.8	135.852	1132.17	122.959	1132.71	103.978	1132.49	95.1776	1130.74	90.403	1130.82	88.1748	1129.95	81.8227
	1132.78	152.883	1130.79	143.811	1132.8	135.437	1133.17	121.484	1133.71	104.206	1133.49	94.5303	1131.74	90.8667	1131.82	87.6623	1130.95	81.4624
	1133.78	151.201	1131.79	143.268	1133.8	135.95	1134.17	122.732	1134.71	104.219	1134.49	93.7309	1132.74	90.8043	1132.82	88.9552	1131.95	81.5634
	1134.78	152.287	1132.79	143.008	1134.8	137.948	1135.17	123.644	1135.71	103.86	1135.49	94.5383	1133.74	90.9929	1133.82	88.7129	1132.95	81.3234
	1135.78	151.928	1133.79	144.146	1135.8	134.853	1136.17	123.25	1136.71	102.933	1136.49	94.0546	1134.74	90.8766	1134.82	88.1903	1133.95	81.3652
	1136.78	152.249	1134.79	144.014	1136.8	135.779	1137.17	123.608	1137.71	103.475	1137.49	94.7032	1135.74	90.5886	1135.82	88.4134	1134.95	82.3166
	1137.78	152.037	1135.79	142.832	1137.8	136.107	1138.17	123.09	1138.71	103.673	1138.49	95.3555	1136.74	90.6579	1136.82	87.9159	1135.95	81.3614
	1138.78	151.599	1136.79	142.96	1138.8	136.58	1139.17	122.316	1139.71	103.646	1139.49	94.1266	1137.74	90.5114	1137.82	88.3615	1136.95	82.2277
	1139.78	151.457	1137.79	144.341	1139.8	136.096	1140.17	122.017	1140.71	104.064	1140.49	95.0913	1138.74	90.6257	1138.82	87.3973	1137.95	81.7404
	1140.78	151.311	1138.79	144.556	1140.8	136.835	1141.17	122.751	1141.71	104.224	1141.49	96.1331	1139.74	90.9247	1139.82	88.1213	1138.95	81.3675
	1141.78	152.086	1139.79	145.006	1141.8	136.846	1142.17	122.674	1142.71	103.578	1142.49	95.2967	1140.74	90.2263	1140.82	87.4395	1139.95	81.2635
	1142.78	152.516	1140.79	143.631	1142.8	137.095	1143.17	122.254	1143.71	104.411	1143.49	95.3975	1141.74	90.8969	1141.82	88.779	1140.95	80.8658
	1143.78	152.269	1141.79	143.847	1143.8	136.091	1144.17	122.094	1144.71	104.284	1144.49	93.9602	1142.74	92.0157	1142.82	87.6379	1141.95	81.9939
	1144.78	151.666	1142.79	143.925	1144.8	136.411	1145.17	122.271	1145.71	104.095	1145.49	95.1036	1143.74	91.5711	1143.82	88.7723	1142.95	81.6461
	1145.78	153.225	1143.79	144.018	1145.8	137.622	1146.17	122.826	1146.71	104.566	1146.49	95.4868	1144.74	90.1973	1144.82	87.979	1143.95	81.9821
	1146.78	151.412	1144.79	142.897	1146.8	136.694	1147.17	123.062	1147.71	103.456	1147.49	95.3731	1145.74	90.4029	1145.82	87.9614	1144.95	81.5209
	1147.78	152.459	1145.79	143.942	1147.8	136.319	1148.17	123.197	1148.71	103.956	1148.49	95.0239	1146.74	90.5612	1146.82	88.6337	1145.95	82.0093
	1148.78	152.26	1146.79	145.224	1148.8	136.951	1149.17	123.072	1149.71	103.842	1149.49	94.9565	1147.74	91.0403	1147.82	87.2087	1146.95	81.8412
	1149.78	152.057	1147.79	143.799	1149.8	136.82	1150.17	124.443	1150.71	104.333	1150.49	95.0578	1148.74	90.8797	1148.82	88.2737	1147.95	81.8308
	1150.78	151.2	1148.79	144.07	1150.8	136.528	1151.17	122.496	1151.71	103.321	1151.49	93.7257	1149.74	90.85	1149.82	88.1045	1148.95	81.6819
	1151.78	151.796	1149.79	143.807	1151.8	134.908	1152.17	121.736	1152.71	104.587	1152.49	94.9985	1150.74	91.0375	1150.82	87.6093	1149.95	81.395
	1152.78	151.933	1150.79	144.625	1152.8	136.892	1153.17	124.709	1153.71	104.422	1153.49	94.2361	1151.74	91.003	1151.82	88.6657	1150.95	82.4749
	1153.78	151.25	1151.79	144.596	1153.8	135.847	1154.17	122.968	1154.71	104.118	1154.49	95.0859	1152.74	90.6708	1152.82	87.313	1151.95	81.3522
	1154.78	151.441	1152.79	143.766	1154.8	138.577	1155.17	122.74	1155.71	103.399	1155.49	94.755	1153.74	91.8615	1153.82	89.7532	1152.95	81.7756
	1155.78	153.069	1153.79	144.294	1155.8	136.684	1156.17	122.859	1156.71	105.254	1156.49	94.5203	1154.74	90.9097	1154.82	87.8593	1153.95	82.2244
	1156.78	151.427	1154.79	145.485	1156.8	136.837	1157.17	122.843	1157.71	104.2	1157.49	94.9407	1155.74	90.2059	1155.82	87.7569	1154.95	82.387
	1157.78	152.7	1155.79	143.522	1157.8	136.866	1158.17	122.504	1158.71	103.282	1158.49	95.1675	1156.74	90.3605	1156.82	88.3784	1155.95	82.0756
	1158.78	152.246	1156.79	144.3	1158.8	137.177	1159.17	123.833	1159.71	103.669	1159.49	94.5795	1157.74	90.3129	1157.82	89.4844	1156.95	82.2989
	1159.78	151.953	1157.79	144.248	1159.8	137.875	1160.17	123.44	1160.71	103.541	1160.49	95.3606	1158.74	91.2719	1158.82	87.6895	1157.95	81.1068
	1160.78	153.05	1158.79	144.115	1160.8	137.485	1161.17	123.784	1161.71	103.627	1161.49	95.5303	1159.74	90.2391	1159.82	88.1602	1158.95	82.0179
	1161.78	152.101	1159.79	144.491	1161.8	137.701	1162.17	123.241	1162.71	103.861	1162.49	95.3092	1160.74	91.2719	1160.82	88.023	1159.95	82.4227
	1162.78	153.026	1160.79	145.489	1162.8	136.86	1163.17	123.23	1163.71	104.203	1163.49	95.0871	1161.74	90.4421	1161.82	88.0991	1160.95	81.2345
	1163.78	152.212	1161.79	144.068	1163.8	137.866	1164.17	123.546	1164.71	104.735	1164.49	94.734	1162.74	90.6383	1162.82	88.2686	1161.95	82.582
	1164.78	152.498	1162.79	144.256	1164.8	137.019	1165.17	123.954	1165.71	105.066	1165.49	95.2449	1163.74	89.874	1163.82	88.5872	1162.95	81.8229
	1165.78	153.838	1163.79	144.697	1165.8	137.059	1166.17	123.047	1166.71	103.517	1166.49	94.2546	1164.74	90.231	1164.82	88.5885	1163.95	82.141
	1166.78	150.897	1164.79	144.303	1166.8	136.533	1167.17	122.777	1167.71	104.688	1167.49	95.6139	1165.74	91.3153	1165.82	87.9432	1164.95	82.0067
	1167.78	153.48	1165.79	144.499	1167.8	137.016	1168.17	123.825	1168.71	104.514	1168.49	95.5252	1166.74	91.0356	1166.82	88.3537	1165.95	81.7579
	1168.78	153.277	1166.79	143.184	1168.8	136.93	1169.17	124.728	1169.71	104.471	1169.49	94.7827	1167.74	90.7379	1167.82	87.8876	1166.95	81.5803
	1169.78	153.859	1167.79	144.219	1169.8	137.798	1170.17	123.255	1170.71	104.613	1170.49	95.2242	1168.74	91.4757	1168.82	87.6635	1167.95	82.2101
	1170.78	152.931	1168.79	144.41	1170.8	137.931	1171.17	122.931	1171.71	103.893	1171.49	94.0573	1169.74	91.2179	1169.82	87.6348	1168.95	82.4478
	1171.78	153.639	1169.79	143.203	1171.8	137.146	1172.17	123.613	1172.71	104.113	1172.49	95.5552	1170.74	90.8887	1170.82	87.8519	1169.95	81.3219
	1172.78	153.377	1170.79	144.283	1172.8	136.417	1173.17	123.343	1173.71	104.405	1173.49	95.4394	1171.74	90.4975	1171.82	88.4939	1170.95	81.6272
	1173.78	153.214	1171.79	145.512	1173.8	136.881	1174.17	122.985	1174.71	104.206	1174.49	95.4867	1172.74	89.5137	1172.82	88.1098	1171.95	82.5259
	1174.78	151.238	1172.79	144.274	1174.8	136.671	1175.17	124.27	1175.71	103.335	1175.49	95.1366	1173.74	90.7574	1173.82	88.7028	1172.95	81.6979
	1175.78	154.035	1173.79	143.215	1175.8	137.411	1176.17	123.438	1176.71	104.762	1176.49	95.1634	1174.74	90.099	1174.82	88.0891	1173.95	82.4017
	1176.78	153.773	1174.79	144.666	1176.8	137.491	1177.17	124.054	1177.71	103.572	1177.49	95.5048	1175.74	91.2648	1175.82	87.8189	1174.95	82.2565
	1177.78	150.912	1175.79	144.784	1177.8	137.686	1178.17	123.537	1178.71	104.228	1178.49	95.1448	1176.74	91.0623	1176.82	88.8018	1175.95	82.0959
	1178.78	152.421	1176.79	144.866	1178.8	136.457	1179.17	123.669	1179.71	104.288	1179.49	94.3939	1177.74	91.7768	1177.82	88.2367	1176.95	82.3509
	1179.78	153.799	1177.79	145.95	1179.8	138.004	1180.17	122.84	1180.71	104.415	1180.49	95.1777	1178.74	91.3166	1178.82	89.2197	1177.95	82.3695
	1180.78	152.631	1178.79	144.502	1180.8	137.998	1181.17	123.5	1181.71	104.181	1181.49	94.8372	1179.74	90.6744	1179.82	88.4202	1178.95	80.8032
	1181.78	153.211	1179.79	145.556	1181.8	138.472	1182.17	123.504	1182.71	104.691	1182.49	94.2974	1180.74	90.234	1180.82	88.2207	1179.95	81.7172
	1182.78	153.365	1180.79	144.465	1182.8	138.347	1183.17	123.517	1183.71	105.329	1183.49	95.4902	1181.74	91.6955	1181.82	88.1873	1180.95	80.9912
	1183.78	154.442	1181.79	144.587	1183.8	136.474	1184.17	123.966	1184.71	103.386	1184.49	95.7847	1182.74	91.6894	1182.82	88.0073	1181.95	81.7182
	1184.78	152.409	1182.79	143.986	1184.8	136.625	1185.17	124.103	1185.71	104.433	1185.49	95.5752	1183.74	90.3975	1183.82	88.3911	1182.95	80.9783
	1185.78	153.994	1183.79	145.151	1185.8	138.129	1186.17	122.341	1186.71	103.489	1186.49	95.0899	1184.74	89.4347	1184.82	88.3897	1183.95	81.6241
	1186.78	153.431	1184.79	145.266	1186.8	139.07	1187.17	123.115	1187.71	104.224	1187.49	94.853	1185.74	90.8467	1185.82	88.9944	1184.95	82.0219
	1187.78	153.464	1185.79	143.611	1187.8	137.871	1188.17	121.699	1188.71	103.935	1188.49	96.9046	1186.74	91.6717	1186.82	88.6334	1185.95	81.5826
	1188.78	154.454	1186.79	143.213	1188.8	137.787	1189.17	123.821	1189.71	103.124	1189.49	94.4493	1187.74	89.8652	1187.82	88.4399	1186.95	81.8897
	1189.78	154.44	1187.79	144.553	1189.8	138.813	1190.17	124.673	1190.71	104.471	1190.49	94.9516	1188.74	91.4594	1188.82	89.0745	1187.95	82.717
	1190.78	153.221	1188.79	146.112	1190.8	136.834	1191.17	123.504	1191.71	104.249	1191.49	95.1081	1189.74	91.2432	1189.82	88.2685	1188.95	82.334
	1191.78	153.182	1189.79	144.838	1191.8	137.133	1192.17	124.031	1192.71	104.005	1192.49	94.3267	1190.74	90.8163	1190.82	88.451	1189.95	81.5534
	1192.78	153.249	1190.79	145.815	1192.8	137.939	1193.17	122.81	1193.71	104.354	1193.49	94.2624	1191.74	90.2655	1191.82	88.4112	1190.95	82.2054
	1193.78	153.649	1191.79	143.83	1193.8	138.095	1194.17	124.922	1194.71	104.79	1194.49	95.9818	1192.74	90.0503	1192.82	87.8478	1191.95	81.988
	1194.78	153.416	1192.79	144.479	1194.8	137.949	1195.17	122.79	1195.71	103.843	1195.49	94.8817	1193.74	90.9787	1193.82	88.2555	1192.95	81.7774
	1195.78	154.687	1193.79	144.235	1195.8	136.721	1196.17	123.332	1196.71	104.358	1196.49	95.0834	1194.74	90.719	1194.82	88.7777	1193.95	81.8908
	1196.78	152.976	1194.79	145.734	1196.8	136.907	1197.17	123.798	1197.71	104.322	1197.49	94.7598	1195.74	90.5129	1195.82	87.8625	1194.95	81.971
	1197.78	152.498	1195.79	144.884	1197.8	137.845	1198.17	123.694	1198.71	104.447	1198.49	94.609	1196.74	92.0673	1196.82	88.6532	1195.95	81.8345
	1198.78	152.605	1196.79	144.655	1198.8	138.824	1199.17	123.404	1199.71	104.173	1199.49	94.2837	1197.74	91.2037	1197.82	88.4622	1196.95	81.8449
	1199.78	154.055	1197.79	146.182	1199.8	139.102	1200.17	124.113	1200.71	104.338	1200.49	95.1244	1198.74	90.6681	1198.82	88.2532	1197.95	81.4626
	1200.78	154.081	1198.79	145.728	1200.8	137.417							1199.74	91.2463	1199.82	88.2783	1198.95	81.3376
			1199.79	145.3									1200.74	92.0171	1200.82	88.2451	1199.95	82.0976
			1200.79	145.774													1200.95	81.5294
	12th Cleaved 5-9 Titrations Control		12th Cleaved 5-9 Titrations 100pM		12th Cleaved 5-9 Titrations 500pM		12th Cleaved 5-9 Titrations 1nM		12th Cleaved 5-9 Titrations 2nM		12th Cleaved 5-9 Titrations 5nM		12th Cleaved 5-9 Titrations 10nM		12th Cleaved 5-9 Titrations 20nM		12th Cleaved 5-9 Titrations 100nM
	12th Cleaved 5-9 Titrations Control		12th Cleaved 5-9 Titrations 100pM		12th Cleaved 5-9 Titrations 500pM		12th Cleaved 5-9 Titrations 1nM		12th Cleaved 5-9 Titrations 2nM		12th Cleaved 5-9 Titrations 5nM		12th Cleaved 5-9 Titrations 10nM		12th Cleaved 5-9 Titrations 20nM		12th Cleaved 5-9 Titrations 100nM
	Collection Time: 12/03/2020 11:19:58		Collection Time: 12/03/2020 10:52:39		Collection Time: 12/03/2020 11:50:23		Collection Time: 12/03/2020 12:16:18		Collection Time: 12/03/2020 12:40:46		Collection Time: 12/03/2020 13:04:10		Collection Time: 12/03/2020 13:29:34		Collection Time: 12/03/2020 13:51:24		Collection Time: 12/03/2020 10:30:00
	Operator Name :		Operator Name :		Operator Name :		Operator Name :		Operator Name :		Operator Name :		Operator Name :		Operator Name :		Operator Name :
	Kinetics Software Version: 1.1(133)		Kinetics Software Version: 1.1(133)		Kinetics Software Version: 1.1(133)		Kinetics Software Version: 1.1(133)		Kinetics Software Version: 1.1(133)		Kinetics Software Version: 1.1(133)		Kinetics Software Version: 1.1(133)		Kinetics Software Version: 1.1(133)		Kinetics Software Version: 1.1(133)
	Parameter List :		Parameter List :		Parameter List :		Parameter List :		Parameter List :		Parameter List :		Parameter List :		Parameter List :		Parameter List :
	Report Time: Thu 12 Mar 11:19:58 AM 2020		Report Time: Thu 12 Mar 10:52:39 AM 2020		Report Time: Thu 12 Mar 11:50:23 AM 2020		Report Time: Thu 12 Mar 12:16:18 PM 2020		Report Time: Thu 12 Mar 12:40:46 PM 2020		Report Time: Thu 12 Mar 01:04:10 PM 2020		Report Time: Thu 12 Mar 01:29:34 PM 2020		Report Time: Thu 12 Mar 01:51:24 PM 2020		Report Time: Thu 12 Mar 10:30:00 AM 2020
	Software version: 1.1(133)		Software version: 1.1(133)		Software version: 1.1(133)		Software version: 1.1(133)		Software version: 1.1(133)		Software version: 1.1(133)		Software version: 1.1(133)		Software version: 1.1(133)		Software version: 1.1(133)
	Operator:		Operator:		Operator:		Operator:		Operator:		Operator:		Operator:		Operator:		Operator:
	Instrument Parameters		Instrument Parameters		Instrument Parameters		Instrument Parameters		Instrument Parameters		Instrument Parameters		Instrument Parameters		Instrument Parameters		Instrument Parameters
	Instrument Cary Eclipse		Instrument Cary Eclipse		Instrument Cary Eclipse		Instrument Cary Eclipse		Instrument Cary Eclipse		Instrument Cary Eclipse		Instrument Cary Eclipse		Instrument Cary Eclipse		Instrument Cary Eclipse
	Instrument Serial Number EL07063152		Instrument Serial Number EL07063152		Instrument Serial Number EL07063152		Instrument Serial Number EL07063152		Instrument Serial Number EL07063152		Instrument Serial Number EL07063152		Instrument Serial Number EL07063152		Instrument Serial Number EL07063152		Instrument Serial Number EL07063152
	Data mode Fluorescence		Data mode Fluorescence		Data mode Fluorescence		Data mode Fluorescence		Data mode Fluorescence		Data mode Fluorescence		Data mode Fluorescence		Data mode Fluorescence		Data mode Fluorescence
	Ex. wavelength (nm) 430.00		Ex. wavelength (nm) 430.00		Ex. wavelength (nm) 430.00		Ex. wavelength (nm) 430.00		Ex. wavelength (nm) 430.00		Ex. wavelength (nm) 430.00		Ex. wavelength (nm) 430.00		Ex. wavelength (nm) 430.00		Ex. wavelength (nm) 430.00
	Em. wavelength (nm) 475.00		Em. wavelength (nm) 475.00		Em. wavelength (nm) 475.00		Em. wavelength (nm) 475.00		Em. wavelength (nm) 475.00		Em. wavelength (nm) 475.00		Em. wavelength (nm) 475.00		Em. wavelength (nm) 475.00		Em. wavelength (nm) 475.00
	Ex. Slit (nm) 10		Ex. Slit (nm) 10		Ex. Slit (nm) 10		Ex. Slit (nm) 10		Ex. Slit (nm) 10		Ex. Slit (nm) 10		Ex. Slit (nm) 10		Ex. Slit (nm) 10		Ex. Slit (nm) 10
	Em. Slit (nm) 5		Em. Slit (nm) 5		Em. Slit (nm) 5		Em. Slit (nm) 5		Em. Slit (nm) 5		Em. Slit (nm) 5		Em. Slit (nm) 5		Em. Slit (nm) 5		Em. Slit (nm) 5
	Averaging Time (s) 1.0000		Averaging Time (s) 1.0000		Averaging Time (s) 1.0000		Averaging Time (s) 1.0000		Averaging Time (s) 1.0000		Averaging Time (s) 1.0000		Averaging Time (s) 1.0000		Averaging Time (s) 1.0000		Averaging Time (s) 1.0000
	Cycle time(s) 0.0000		Cycle time(s) 0.0000		Cycle time(s) 0.0000		Cycle time(s) 0.0000		Cycle time(s) 0.0000		Cycle time(s) 0.0000		Cycle time(s) 0.0000		Cycle time(s) 0.0000		Cycle time(s) 0.0000
	Stop time(s) 1200.0000		Stop time(s) 1200.0000		Stop time(s) 1200.0000		Stop time(s) 1200.0000		Stop time(s) 1200.0000		Stop time(s) 1200.0000		Stop time(s) 1200.0000		Stop time(s) 1200.0000		Stop time(s) 1200.0000
	Emission filter Open		Emission filter Open		Emission filter Open		Emission filter Open		Emission filter Open		Emission filter Open		Emission filter Open		Emission filter Open		Emission filter Open
	Excitation Filter Auto		Excitation Filter Auto		Excitation Filter Auto		Excitation Filter Auto		Excitation Filter Auto		Excitation Filter Auto		Excitation Filter Auto		Excitation Filter Auto		Excitation Filter Auto
	PMT voltage (V) High		PMT voltage (V) High		PMT voltage (V) High		PMT voltage (V) High		PMT voltage (V) High		PMT voltage (V) High		PMT voltage (V) High		PMT voltage (V) High		PMT voltage (V) High
	Comments:		Comments:		Comments:		Comments:		Comments:		Comments:		Comments:		Comments:		Comments:
	Method Log :		Method Log :		Method Log :		Method Log :		Method Log :		Method Log :		Method Log :		Method Log :		Method Log :
	Method Name : C:\Documents and Settings\eclipse\My Documents\Eclipse_Users\Emma&Emma\Checks\AddAB Reaction Improved.FMKN		Method Name : C:\Documents and Settings\eclipse\My Documents\Eclipse_Users\Emma&Emma\Checks\AddAB Reaction Improved.FMKN		Method Name : C:\Documents and Settings\eclipse\My Documents\Eclipse_Users\Emma&Emma\Checks\AddAB Reaction Improved.FMKN		Method Name : C:\Documents and Settings\eclipse\My Documents\Eclipse_Users\Emma&Emma\Checks\AddAB Reaction Improved.FMKN		Method Name : C:\Documents and Settings\eclipse\My Documents\Eclipse_Users\Emma&Emma\Checks\AddAB Reaction Improved.FMKN		Method Name : C:\Documents and Settings\eclipse\My Documents\Eclipse_Users\Emma&Emma\Checks\AddAB Reaction Improved.FMKN		Method Name : C:\Documents and Settings\eclipse\My Documents\Eclipse_Users\Emma&Emma\Checks\AddAB Reaction Improved.FMKN		Method Name : C:\Documents and Settings\eclipse\My Documents\Eclipse_Users\Emma&Emma\Checks\AddAB Reaction Improved.FMKN		Method Name : C:\Documents and Settings\eclipse\My Documents\Eclipse_Users\Emma&Emma\AddAB Reaction Improved.FMKN
	Date/Time stamp: 26/02/2020 12:10:23		Date/Time stamp: 26/02/2020 12:10:23		Date/Time stamp: 26/02/2020 12:10:23		Date/Time stamp: 26/02/2020 12:10:23		Date/Time stamp: 26/02/2020 12:10:23		Date/Time stamp: 26/02/2020 12:10:23		Date/Time stamp: 26/02/2020 12:10:23		Date/Time stamp: 26/02/2020 12:10:23		Date/Time stamp: 26/02/2020 12:10:23
	Method Modifications:		Method Modifications:		Method Modifications:		Method Modifications:		Method Modifications:		Method Modifications:		Method Modifications:		Method Modifications:		Method Modifications:
	Excitation Wavelength Changed: 21/02/2020 15:10:08	Old: 400.00	Excitation Wavelength Changed: 21/02/2020 15:10:08	Old: 400.00	Excitation Wavelength Changed: 21/02/2020 15:10:08	Old: 400.00	Excitation Wavelength Changed: 21/02/2020 15:10:08	Old: 400.00	Excitation Wavelength Changed: 21/02/2020 15:10:08	Old: 400.00	Excitation Wavelength Changed: 21/02/2020 15:10:08	Old: 400.00	Excitation Wavelength Changed: 21/02/2020 15:10:08	Old: 400.00	Excitation Wavelength Changed: 21/02/2020 15:10:08	Old: 400.00	Excitation Wavelength Changed: 21/02/2020 15:10:08	Old: 400.00
	Emission Wavelength Changed: 21/02/2020 15:10:08	Old: 600.00	Emission Wavelength Changed: 21/02/2020 15:10:08	Old: 600.00	Emission Wavelength Changed: 21/02/2020 15:10:08	Old: 600.00	Emission Wavelength Changed: 21/02/2020 15:10:08	Old: 600.00	Emission Wavelength Changed: 21/02/2020 15:10:08	Old: 600.00	Emission Wavelength Changed: 21/02/2020 15:10:08	Old: 600.00	Emission Wavelength Changed: 21/02/2020 15:10:08	Old: 600.00	Emission Wavelength Changed: 21/02/2020 15:10:08	Old: 600.00	Emission Wavelength Changed: 21/02/2020 15:10:08	Old: 600.00
	Ex. Slit Width (nm): Changed: 21/02/2020 15:10:08	Old:5	Ex. Slit Width (nm): Changed: 21/02/2020 15:10:08	Old:5	Ex. Slit Width (nm): Changed: 21/02/2020 15:10:08	Old:5	Ex. Slit Width (nm): Changed: 21/02/2020 15:10:08	Old:5	Ex. Slit Width (nm): Changed: 21/02/2020 15:10:08	Old:5	Ex. Slit Width (nm): Changed: 21/02/2020 15:10:08	Old:5	Ex. Slit Width (nm): Changed: 21/02/2020 15:10:08	Old:5	Ex. Slit Width (nm): Changed: 21/02/2020 15:10:08	Old:5	Ex. Slit Width (nm): Changed: 21/02/2020 15:10:08	Old:5
	X mode Changed: 21/02/2020 15:10:08	Old:min	X mode Changed: 21/02/2020 15:10:08	Old:min	X mode Changed: 21/02/2020 15:10:08	Old:min	X mode Changed: 21/02/2020 15:10:08	Old:min	X mode Changed: 21/02/2020 15:10:08	Old:min	X mode Changed: 21/02/2020 15:10:08	Old:min	X mode Changed: 21/02/2020 15:10:08	Old:min	X mode Changed: 21/02/2020 15:10:08	Old:min	X mode Changed: 21/02/2020 15:10:08	Old:min
	Ave. time (s): Changed: 21/02/2020 15:10:08	Old:0.10000	Ave. time (s): Changed: 21/02/2020 15:10:08	Old:0.10000	Ave. time (s): Changed: 21/02/2020 15:10:08	Old:0.10000	Ave. time (s): Changed: 21/02/2020 15:10:08	Old:0.10000	Ave. time (s): Changed: 21/02/2020 15:10:08	Old:0.10000	Ave. time (s): Changed: 21/02/2020 15:10:08	Old:0.10000	Ave. time (s): Changed: 21/02/2020 15:10:08	Old:0.10000	Ave. time (s): Changed: 21/02/2020 15:10:08	Old:0.10000	Ave. time (s): Changed: 21/02/2020 15:10:08	Old:0.10000
	Stop Time 1 Changed: 21/02/2020 15:10:08	Old: 1.0000	Stop Time 1 Changed: 21/02/2020 15:10:08	Old: 1.0000	Stop Time 1 Changed: 21/02/2020 15:10:08	Old: 1.0000	Stop Time 1 Changed: 21/02/2020 15:10:08	Old: 1.0000	Stop Time 1 Changed: 21/02/2020 15:10:08	Old: 1.0000	Stop Time 1 Changed: 21/02/2020 15:10:08	Old: 1.0000	Stop Time 1 Changed: 21/02/2020 15:10:08	Old: 1.0000	Stop Time 1 Changed: 21/02/2020 15:10:08	Old: 1.0000	Stop Time 1 Changed: 21/02/2020 15:10:08	Old: 1.0000
	PMT Volts Changed: 21/02/2020 15:10:26	Old:600	PMT Volts Changed: 21/02/2020 15:10:26	Old:600	PMT Volts Changed: 21/02/2020 15:10:26	Old:600	PMT Volts Changed: 21/02/2020 15:10:26	Old:600	PMT Volts Changed: 21/02/2020 15:10:26	Old:600	PMT Volts Changed: 21/02/2020 15:10:26	Old:600	PMT Volts Changed: 21/02/2020 15:10:26	Old:600	PMT Volts Changed: 21/02/2020 15:10:26	Old:600	PMT Volts Changed: 21/02/2020 15:10:26	Old:600
	Emission PMT (V): Changed: 21/02/2020 15:10:26	Old: 600	Emission PMT (V): Changed: 21/02/2020 15:10:26	Old: 600	Emission PMT (V): Changed: 21/02/2020 15:10:26	Old: 600	Emission PMT (V): Changed: 21/02/2020 15:10:26	Old: 600	Emission PMT (V): Changed: 21/02/2020 15:10:26	Old: 600	Emission PMT (V): Changed: 21/02/2020 15:10:26	Old: 600	Emission PMT (V): Changed: 21/02/2020 15:10:26	Old: 600	Emission PMT (V): Changed: 21/02/2020 15:10:26	Old: 600	Emission PMT (V): Changed: 21/02/2020 15:10:26	Old: 600
	Stop Time 1 Changed: 25/02/2020 14:47:32	Old:600.0000	Stop Time 1 Changed: 25/02/2020 14:47:32	Old:600.0000	Stop Time 1 Changed: 25/02/2020 14:47:32	Old:600.0000	Stop Time 1 Changed: 25/02/2020 14:47:32	Old:600.0000	Stop Time 1 Changed: 25/02/2020 14:47:32	Old:600.0000	Stop Time 1 Changed: 25/02/2020 14:47:32	Old:600.0000	Stop Time 1 Changed: 25/02/2020 14:47:32	Old:600.0000	Stop Time 1 Changed: 25/02/2020 14:47:32	Old:600.0000	Stop Time 1 Changed: 25/02/2020 14:47:32	Old:600.0000
	Stop Time 1 Changed: 26/02/2020 11:49:31	Old:900.0000	Stop Time 1 Changed: 26/02/2020 11:49:31	Old:900.0000	Stop Time 1 Changed: 26/02/2020 11:49:31	Old:900.0000	Stop Time 1 Changed: 26/02/2020 11:49:31	Old:900.0000	Stop Time 1 Changed: 26/02/2020 11:49:31	Old:900.0000	Stop Time 1 Changed: 26/02/2020 11:49:31	Old:900.0000	Stop Time 1 Changed: 26/02/2020 11:49:31	Old:900.0000	Stop Time 1 Changed: 26/02/2020 11:49:31	Old:900.0000	Stop Time 1 Changed: 26/02/2020 11:49:31	Old:900.0000
	End Method Modifications		End Method Modifications		End Method Modifications		End Method Modifications		End Method Modifications		End Method Modifications		End Method Modifications		End Method Modifications		End Method Modifications

## Sheet: Repeat 3
gp5.9:	Control		100pM		500pM		1nM		2nM		5nM		10nM		20nM		100nM
	Time (s)	Fluoro	Time (s)	Fluoro	Time (s)	Fluoro	Time (s)	Fluoro	Time (s)	Fluoro	Time (s)	Fluoro	Time (s)	Fluoro	Time (s)	Fluoro	Time (s)	Fluoro
	0.5	92.1357	0.5	85.9176	0.5	85.3974	0.5	81.2994	0.5	82.5065	0.5	79.9748	0.5	78.9918	0.5	76.1465	0.5	76.1669
	1.5	93.0839	1.5	87.0792	1.5	84.3054	1.5	82.2657	1.5	83.5625	1.5	80.6209	1.5	80.634	1.5	76.1794	1.5	76.6013
	2.5	92.6004	2.5	87.9334	2.5	85.8285	2.5	81.8726	2.5	82.9581	2.5	81.6434	2.5	79.994	2.5	76.6449	2.5	77.2726
	3.5	92.5985	3.5	85.9181	3.5	85.6026	3.5	82.242	3.5	83.698	3.5	81.3712	3.5	79.9286	3.5	76.0587	3.5	76.7641
	4.5	94.0901	4.5	87.6377	4.5	85.4762	4.5	82.3182	4.5	83.9846	4.5	80.7166	4.5	80.7431	4.5	76.6787	4.5	78.106
	5.5	92.9438	5.5	86.75	5.5	85.1137	5.5	80.8496	5.5	82.8462	5.5	79.9161	5.5	80.0425	5.5	77.4062	5.5	77.6333
	6.5	93.9394	6.5	87.2455	6.5	84.6926	6.5	81.2525	6.5	82.1626	6.5	80.7399	6.5	79.3143	6.5	77.2119	6.5	77.0906
	7.5	93.1847	7.5	87.4665	7.5	85.5011	7.5	81.3405	7.5	83.3494	7.5	80.5213	7.5	80.1207	7.5	77.5933	7.5	77.6833
	8.5	92.3946	8.5	87.0482	8.5	85.0141	8.5	81.6922	8.5	83.2501	8.5	80.8913	8.5	80.3455	8.5	77.2927	8.5	76.8887
	9.5	92.938	9.5	87.6823	9.5	85.6663	9.5	82.2801	9.5	84.3016	9.5	80.9128	9.5	80.074	9.5	75.9919	9.5	77.445
	10.5	92.2164	10.5	87.5277	10.5	85.9728	10.5	82.1594	10.5	85.0852	10.5	81.6351	10.5	79.9987	10.5	76.6892	10.5	78.2219
	11.5	92.6605	11.5	87.3759	11.5	86.3787	11.5	82.9298	11.5	84.9117	11.5	80.794	11.5	80.0152	11.5	76.7505	11.5	77.419
	12.5	92.6674	12.5	86.6469	12.5	85.665	12.5	82.1605	12.5	83.8424	12.5	80.4753	12.5	78.9183	12.5	76.5047	12.5	77.5239
	13.5	92.9348	13.5	87.5113	13.5	86.0804	13.5	80.6699	13.5	83.6386	13.5	81.0304	13.5	79.8782	13.5	77.8378	13.5	77.6284
	14.5	93.1134	14.5	88.3585	14.5	85.5855	14.5	82.2519	14.5	83.3687	14.5	80.0132	14.5	79.7658	14.5	76.9998	14.5	77.8055
	15.5	92.2736	15.5	86.5394	15.5	86.082	15.5	82.2886	15.5	82.8481	15.5	79.6982	15.5	79.2167	15.5	75.9794	15.5	78.1926
	16.5	93.0003	16.5	87.3846	16.5	85.2976	16.5	81.2247	16.5	83.5564	16.5	80.9189	16.5	80.3419	16.5	76.4007	16.5	78.4354
	17.5	91.2774	17.5	87.0373	17.5	84.993	17.5	82.137	17.5	83.0897	17.5	81.3761	17.5	79.3264	17.5	76.5177	17.5	76.9799
	18.5	93.2423	18.5	86.5967	18.5	85.5863	18.5	81.2739	18.5	83.9795	18.5	80.9447	18.5	79.2057	18.5	76.112	18.5	77.6681
	19.5	92.1293	19.5	87.5595	19.5	85.8302	19.5	81.7862	19.5	83.0735	19.5	81.6818	19.5	80.3776	19.5	76.9794	19.5	77.375
	20.5	91.365	20.5	86.4934	20.5	85.7066	20.5	81.8197	20.5	82.5287	20.5	81.5532	20.5	80.3291	20.5	76.8688	20.5	76.5659
	21.5	92.8214	21.5	87.0912	21.5	85.7903	21.5	81.9562	21.5	82.8456	21.5	80.9364	21.5	80.2187	21.5	76.0773	21.5	77.123
	22.5	92.8666	22.5	86.3877	22.5	85.2666	22.5	81.4827	22.5	82.2513	22.5	81.0079	22.5	79.9948	22.5	76.7936	22.5	78.2335
	23.5	93.9457	23.5	87.1677	23.5	84.8203	23.5	81.7732	23.5	83.4201	23.5	80.8974	23.5	80.2617	23.5	76.7539	23.5	76.8183
	24.5	92.434	24.5	86.3438	24.5	85.5323	24.5	81.7874	24.5	83.0269	24.5	80.5302	24.5	80.0406	24.5	76.323	24.5	77.9448
	25.5	92.0544	25.5	87.7397	25.5	85.0445	25.5	81.8625	25.5	84.0734	25.5	80.6084	25.5	79.9309	25.5	77.635	25.5	77.7602
	26.5	92.9264	26.5	86.9434	26.5	85.2766	26.5	82.1488	26.5	82.8677	26.5	81.2955	26.5	79.8106	26.5	78.4733	26.5	77.166
	27.5	92.0643	27.5	87.203	27.5	85.848	27.5	82.3983	27.5	83.3255	27.5	81.1611	27.5	80.1911	27.5	76.6802	27.5	76.3622
	28.5	92.5498	28.5	86.7137	28.5	85.1486	28.5	81.894	28.5	82.7833	28.5	80.5392	28.5	79.739	28.5	76.2389	28.5	77.3196
	29.5	92.928	29.5	87.7487	29.5	85.2375	29.5	81.1146	29.5	82.0526	29.5	80.2666	29.5	79.485	29.5	77.2276	29.5	77.2123
	30.5	92.8685	30.5	87.4621	30.5	85.7928	30.5	81.185	30.5	83.28	30.5	80.7434	30.5	79.7487	30.5	76.9227	30.5	77.3994
	31.5	92.4188	31.5	86.8473	31.5	85.5934	31.5	82.399	31.5	82.7416	31.5	80.8449	31.5	80.457	31.5	76.8597	31.5	77.5106
	32.5	94.03	32.5	86.8988	32.5	85.4867	32.5	80.9628	32.5	82.2233	32.5	80.6243	32.5	79.3789	32.5	76.7565	32.5	77.1712
	33.5	93.2001	33.5	86.3139	33.5	84.8818	33.5	81.7036	33.5	82.8175	33.5	81.1953	33.5	80.5786	33.5	76.5589	33.5	78.2513
	34.5	92.564	34.5	86.4245	34.5	85.4773	34.5	82.2317	34.5	82.4446	34.5	79.7203	34.5	80.138	34.5	77.1067	34.5	76.6307
	35.5	93.9146	35.5	86.0795	35.5	84.5776	35.5	82.3925	35.5	84.3019	35.5	80.8956	35.5	79.2228	35.5	77.284	35.5	77.7112
	36.5	92.945	36.5	87.0631	36.5	85.2233	36.5	82.0266	36.5	84.139	36.5	81.1828	36.5	79.8804	36.5	77.1065	36.5	77.2631
	37.5	93.4079	37.5	86.85	37.5	85.5091	37.5	81.3978	37.5	82.6172	37.5	81.6125	37.5	79.3536	37.5	77.5918	37.5	76.9757
	38.5	92.5018	38.5	86.8978	38.5	85.4645	38.5	82.0493	38.5	83.5439	38.5	80.746	38.5	79.0946	38.5	77.3923	38.5	78.2701
	39.5	93.9809	39.5	87.0421	39.5	85.3106	39.5	80.9047	39.5	84.9282	39.5	80.3182	39.5	79.4056	39.5	76.9639	39.5	77.6825
	40.5	93.4581	40.5	86.6664	40.5	85.072	40.5	81.574	40.5	83.6108	40.5	81.1273	40.5	79.9069	40.5	78.2004	40.5	77.7489
	41.5	93.128	41.5	86.8989	41.5	85.4187	41.5	81.4926	41.5	84.1378	41.5	80.2966	41.5	79.8104	41.5	77.536	41.5	78.0223
	42.5	93.4418	42.5	87.4092	42.5	85.0298	42.5	80.8518	42.5	84.3576	42.5	80.4625	42.5	79.7801	42.5	77.2109	42.5	77.5263
	43.5	93.4795	43.5	87.6487	43.5	85.1224	43.5	80.5813	43.5	84.2478	43.5	80.4247	43.5	79.8146	43.5	77.1234	43.5	78.7682
	44.5	92.2593	44.5	86.9037	44.5	85.5451	44.5	82.3271	44.5	83.922	44.5	80.6756	44.5	79.5498	44.5	77.9292	44.5	76.7329
	45.5	91.9293	45.5	86.9361	45.5	85.464	45.5	82.0454	45.5	83.9913	45.5	80.9178	45.5	79.3045	45.5	77.2798	45.5	77.7015
	46.5	92.6851	46.5	87.2978	46.5	85.4696	46.5	82.0898	46.5	83.7169	46.5	80.5516	46.5	80.1575	46.5	77.1661	46.5	77.1896
	47.5	93.2401	47.5	87.2127	47.5	85.3949	47.5	82.0852	47.5	83.975	47.5	80.5163	47.5	80.4649	47.5	77.3487	47.5	77.5152
	48.5	92.9632	48.5	87.7446	48.5	84.907	48.5	82.1871	48.5	83.4766	48.5	80.2507	48.5	80.2439	48.5	77.4117	48.5	77.4297
	49.5	93.1704	49.5	87.5697	49.5	84.8727	49.5	81.5766	49.5	82.727	49.5	80.1977	49.5	80.1608	49.5	76.9194	49.5	78.3922
	50.5	92.355	50.5	86.8316	50.5	85.4509	50.5	81.1358	50.5	83.4727	50.5	80.3465	50.5	80.0035	50.5	77.0907	50.5	77.8647
	51.5	92.3363	51.5	87.382	51.5	84.0415	51.5	81.8411	51.5	83.0934	51.5	80.7489	51.5	80.9628	51.5	76.7745	51.5	77.5164
	52.5	92.6188	52.5	87.9731	52.5	84.7527	52.5	80.9436	52.5	82.8021	52.5	79.487	52.5	79.2994	52.5	76.5512	52.5	77.1998
	53.5	92.7069	53.5	87.3478	53.5	85.4354	53.5	81.6841	53.5	82.7425	53.5	81.4885	53.5	79.6295	53.5	76.54	53.5	77.6025
	54.5	92.584	54.5	88.0278	54.5	84.6431	54.5	82.3443	54.5	82.7475	54.5	80.2755	54.5	79.8698	54.5	75.3391	54.5	77.6447
	55.5	92.3581	55.5	87.1416	55.5	85.0283	55.5	81.6048	55.5	83.3227	55.5	80.5192	55.5	79.4873	55.5	76.7248	55.5	77.4232
	56.5	92.2928	56.5	86.8793	56.5	84.3699	56.5	81.4576	56.5	82.8297	56.5	80.6858	56.5	80.2592	56.5	76.9554	56.5	77.5497
	57.5	92.1668	57.5	86.5475	57.5	84.6652	57.5	82.1118	57.5	82.9563	57.5	79.8999	57.5	79.116	57.5	75.8882	57.5	77.1865
	58.5	92.3335	58.5	87.0943	58.5	85.6737	58.5	81.3237	58.5	83.9104	58.5	80.4687	58.5	80.8153	58.5	77.4769	58.5	77.242
	59.5	93.5019	59.5	87.2714	59.5	85.5265	59.5	81.5057	59.5	82.6395	59.5	80.4848	59.5	80.0301	59.5	76.6303	59.5	77.1368
	60.5	91.8464	60.5	86.7019	60.5	85.75	60.5	82.5473	60.5	82.7554	60.5	80.9953	60.5	79.4624	60.5	76.869	60.5	77.1169
	61.5	92.1574	61.5	86.7277	61.5	85.7336	61.5	81.4504	61.5	82.2119	61.5	82.1315	61.5	79.6697	61.5	76.8545	61.5	78.4478
	62.5	92.2902	62.5	86.4951	62.5	84.8563	62.5	81.4638	62.5	83.2258	62.5	80.1828	62.5	78.688	62.5	76.2571	62.5	76.9475
	63.5	93.2508	63.5	87.0388	63.5	84.1181	63.5	82.2153	63.5	83.3337	63.5	81.6221	63.5	78.9327	63.5	76.1501	63.5	77.6855
	64.5	93.6491	64.5	87.0102	64.5	85.4615	64.5	81.5874	64.5	83.9945	64.5	81.0406	64.5	78.9968	64.5	76.8171	64.5	77.7883
	65.5	92.1179	65.5	86.8873	65.5	84.762	65.5	81.1271	65.5	83.257	65.5	80.3251	65.5	79.5499	65.5	77.5346	65.5	77.6628
	66.5	92.9147	66.5	87.3262	66.5	85.4867	66.5	81.4648	66.5	83.9723	66.5	81.1967	66.5	79.6618	66.5	76.2672	66.5	77.2715
	67.5	92.5212	67.5	86.5029	67.5	85.531	67.5	82.2701	67.5	82.973	67.5	80.7537	67.5	79.5571	67.5	77.1018	67.5	77.6272
	68.5	92.3204	68.5	87.1936	68.5	84.8581	68.5	81.8216	68.5	83.5855	68.5	80.9178	68.5	79.2093	68.5	77.4029	68.5	77.4423
	69.5	92.8764	69.5	87.1091	69.5	85.1757	69.5	81.8878	69.5	83.2817	69.5	79.9182	69.5	79.0253	69.5	76.3755	69.5	77.4352
	70.5	92.7939	70.5	86.6486	70.5	85.049	70.5	82.1578	70.5	83.6323	70.5	80.9397	70.5	80.0949	70.5	77.299	70.5	77.3764
	71.5	92.882	71.5	86.8823	71.5	84.5501	71.5	82.9273	71.5	82.2266	71.5	80.48	71.5	79.6303	71.5	77.0194	71.5	78.1921
	72.5	91.9991	72.5	87.5618	72.5	86.0067	72.5	82.4454	72.5	82.8788	72.5	80.8215	72.5	79.3399	72.5	77.0513	72.5	76.8228
	73.5	92.9721	73.5	86.7181	73.5	85.6178	73.5	81.6266	73.5	83.0035	73.5	80.9823	73.5	80.1436	73.5	77.5591	73.5	78.1717
	74.5	93.1758	74.5	87.1539	74.5	85.3064	74.5	81.3222	74.5	83.2794	74.5	80.6304	74.5	79.7733	74.5	76.7558	74.5	77.7527
	75.5	92.9899	75.5	86.7248	75.5	84.7325	75.5	81.1078	75.5	83.5425	75.5	80.1898	75.5	79.709	75.5	76.8194	75.5	77.753
	76.5	92.7292	76.5	87.1119	76.5	84.8599	76.5	81.2478	76.5	83.3622	76.5	81.1534	76.5	79.1805	76.5	76.914	76.5	76.6715
	77.5	92.8827	77.5	86.589	77.5	84.0111	77.5	82.8658	77.5	83.388	77.5	80.9431	77.5	80.1141	77.5	76.708	77.5	77.2002
	78.5	93.0491	78.5	86.0967	78.5	84.9265	78.5	81.9019	78.5	84.0577	78.5	80.7392	78.5	79.2525	78.5	76.3698	78.5	77.4957
	79.5	92.9495	79.5	86.5819	79.5	85.2485	79.5	81.9859	79.5	83.439	79.5	80.2779	79.5	79.1795	79.5	76.9487	79.5	77.4589
	80.5	91.8524	80.5	86.4679	80.5	84.7784	80.5	82.916	80.5	82.7013	80.5	81.4275	80.5	80.5016	80.5	76.7824	80.5	77.247
	81.5	93.2113	81.5	86.1383	81.5	84.6633	81.5	81.3641	81.5	83.1903	81.5	80.3103	81.5	80.0425	81.5	76.4604	81.5	77.3497
	82.5	91.4855	82.5	87.277	82.5	86.158	101.291	80.6417	82.5	83.3638	82.5	81.1403	82.5	79.6605	82.5	76.4025	82.5	76.4035
	83.5	92.6002	83.5	86.8773	83.5	85.206	102.291	82.4405	83.5	84.2498	83.5	80.0306	83.5	80.327	83.5	76.3086	83.5	78.0888
	84.5	92.6019	84.5	86.5965	84.5	84.5742	103.291	81.7953	84.5	83.3424	84.5	79.4007	84.5	79.9211	84.5	76.6353	84.5	77.4357
	85.5	92.0288	85.5	86.4633	85.5	86.5116	104.291	81.9991	85.5	83.8275	85.5	80.0936	85.5	79.3394	85.5	78.0824	85.5	76.919
	86.5	92.6745	86.5	86.6414	86.5	85.6838	105.291	81.4201	86.5	84.1164	86.5	81.8611	86.5	80.0538	86.5	76.8684	86.5	76.94
	87.5	91.8922	87.5	86.3275	87.5	85.5542	106.291	81.8512	87.5	82.9013	87.5	81.1653	87.5	80.1207	87.5	77.1952	87.5	77.6954
	88.5	91.9427	88.5	86.9061	88.5	85.4428	107.291	82.5492	88.5	84.0769	88.5	80.8965	88.5	78.4994	88.5	77.1433	88.5	77.215
	89.5	91.9761	89.5	87.042	89.5	85.7998	108.291	82.3132	89.5	82.5222	108.27	84.7356	89.5	80.021	89.5	76.9765	89.5	78.1625
	90.5	91.8804	90.5	86.8007	90.5	85.0581	109.291	83.3923	90.5	83.9399	109.27	85.571	90.5	79.5666	90.5	76.3393	90.5	77.3014
	91.5	91.8646	91.5	85.7344	91.5	85.2826	110.291	82.3199	91.5	82.6017	110.27	85.0668	91.5	79.9252	91.5	76.06	110.626	76.8317
	92.5	92.7001	92.5	86.9497	92.5	85.1093	111.291	82.4687	92.5	83.8074	111.27	85.7795	92.5	79.4505	92.5	76.8009	111.626	77.3592
	93.5	92.632	93.5	86.6832	93.5	84.7849	112.291	82.6449	93.5	83.6825	112.27	85.7426	93.5	79.0527	93.5	77.1141	112.626	77.8617
	94.5	93.2558	94.5	87.2248	94.5	85.666	113.291	82.3137	94.5	83.497	113.27	86.0868	115.97	82.35	94.5	77.6435	113.626	77.9642
	95.5	93.0565	95.5	86.4873	95.5	85.4668	114.291	82.5171	95.5	83.5704	114.27	86.0549	116.97	82.6828	95.5	77.8564	114.626	77.7471
	96.5	91.7475	96.5	87.5483	96.5	84.7789	115.291	83.1745	96.5	82.2078	115.27	85.925	117.97	82.6256	96.5	77.8064	115.626	77.7461
	97.5	92.4148	97.5	86.4956	97.5	85.5296	116.291	81.5008	97.5	83.8754	116.27	85.2154	118.97	82.4709	97.5	76.3242	116.626	78.7294
	98.5	92.9636	98.5	85.9298	98.5	85.7463	117.291	82.6185	98.5	82.9254	117.27	85.5841	119.97	82.466	98.5	77.431	117.626	77.4049
	99.5	93.2832	99.5	86.8438	99.5	85.1813	118.291	82.4704	99.5	83.733	118.27	85.8353	120.97	82.1256	99.5	76.7905	118.626	77.025
	100.5	92.1541	100.5	87.0666	100.5	84.9299	119.291	82.3617	100.5	83.8151	119.27	85.9527	121.97	83.2532	100.5	77.0454	119.626	78.3484
	101.5	93.1943	101.5	86.6929	101.5	85.4343	120.291	82.0243	101.5	83.3682	120.27	85.1535	122.97	82.9334	101.5	77.2143	120.626	77.9219
	102.5	92.1386	102.5	86.9909	102.5	84.6433	121.291	82.3601	102.5	83.0357	121.27	85.5937	123.97	82.0463	102.5	77.6495	121.626	78.1219
	103.5	92.3924	103.5	86.9368	103.5	85.8561	122.291	82.6644	103.5	84.1784	122.27	85.6947	124.97	82.2021	103.5	77.479	122.626	78.0837
	104.5	91.6897	104.5	86.8083	104.5	84.6274	123.291	83.6171	104.5	83.7076	123.27	85.3781	125.97	81.9115	104.5	76.2135	123.626	78.4736
	105.5	93.5511	105.5	87.0904	105.5	84.9101	124.291	82.8494	105.5	82.1017	124.27	84.918	126.97	82.0862	105.5	76.9285	124.626	78.1671
	106.5	93.1339	126.652	87.6692	106.5	84.0816	125.291	83.409	106.5	83.3956	125.27	85.4222	127.97	82.401	106.5	77.1719	125.626	78.264
	107.5	92.3273	127.652	87.0684	107.5	85.3571	126.291	82.8488	107.5	83.4513	126.27	84.7865	128.97	81.948	107.5	77.5013	126.626	78.6684
	108.5	92.1273	128.652	87.5546	108.5	85.4749	127.291	83.4257	127.76	85.3444	127.27	86.1805	129.97	81.502	108.5	76.2003	127.626	77.4621
	109.5	92.5798	129.652	88.1138	109.5	85.5333	128.291	83.1282	128.76	85.6203	128.27	85.8067	130.97	81.0702	109.5	77.1588	128.626	78.3774
	110.5	91.8708	130.652	86.6077	110.5	84.4466	129.291	83.6575	129.76	86.3632	129.27	85.5206	131.97	81.5082	110.5	77.0623	129.626	78.8603
	111.5	92.7442	131.652	86.2404	111.5	83.8594	130.291	83.7927	130.76	85.7824	130.27	85.4856	132.97	82.6066	111.5	76.4359	130.626	78.5946
	112.5	91.9148	132.652	87.3913	112.5	85.1499	131.291	83.1204	131.76	86.9363	131.27	84.766	133.97	82.0134	112.5	77.1348	131.626	78.6642
	113.5	92.2322	133.652	87.8795	113.5	85.1512	132.291	83.8808	132.76	86.1189	132.27	85.6814	134.97	81.6087	113.5	76.22	132.626	77.2379
	114.5	92.021	134.652	87.9893	114.5	85.1721	133.291	82.5046	133.76	86.2551	133.27	85.8614	135.97	81.6125	114.5	76.6541	133.626	78.1357
	115.5	93.0621	135.652	87.5357	115.5	85.069	134.291	83.831	134.76	86.6663	134.27	86.4017	136.97	81.2039	115.5	77.1855	134.626	77.8366
	116.5	92.7448	136.652	87.1961	116.5	85.3096	135.291	83.7029	135.76	86.5185	135.27	85.7709	137.97	82.1665	116.5	76.9878	135.626	78.6726
	117.5	92.6948	137.652	88.2391	117.5	85.1141	136.291	83.4303	136.76	86.7445	136.27	85.5781	138.97	81.3897	117.5	76.475	136.626	78.4763
	118.5	92.6914	138.652	88.285	118.5	84.7242	137.291	83.7812	137.76	87.4417	137.27	86.5496	139.97	82.4608	118.5	77.1819	137.626	78.5661
	119.5	92.6851	139.652	88.432	119.5	84.7278	138.291	83.3344	138.76	87.1831	138.27	85.1639	140.97	81.9324	119.5	77.2277	138.626	78.9242
	120.5	91.0021	140.652	88.4163	120.5	85.8354	139.291	84.0142	139.76	87.1391	139.27	85.7415	141.97	81.3805	120.5	76.8663	139.626	78.5718
	121.5	92.6759	141.652	87.6327	121.5	85.5097	140.291	84.272	140.76	87.0146	140.27	86.1003	142.97	81.6813	121.5	77.4921	140.626	78.2856
	122.5	92.4344	142.652	88.6202	122.5	85.2468	141.291	84.2722	141.76	86.8808	141.27	85.466	143.97	81.8058	122.5	76.758	141.626	77.0073
	123.5	92.3126	143.652	88.9608	123.5	85.3689	142.291	83.8913	142.76	86.512	142.27	85.6924	144.97	82.1399	123.5	76.6429	142.626	79.2304
	124.5	92.2498	144.652	88.1678	124.5	84.7122	143.291	83.8868	143.76	86.6999	143.27	85.0567	145.97	82.3351	124.5	77.4554	143.626	78.0283
	125.5	92.6867	145.652	88.4798	125.5	84.409	144.291	83.3269	144.76	86.2035	144.27	85.9426	146.97	81.8614	125.5	76.2345	144.626	78.931
	126.5	92.959	146.652	88.9582	126.5	84.2846	145.291	82.9538	145.76	86.3778	145.27	85.96	147.97	81.5508	126.5	77.0212	145.626	77.9217
	127.5	92.5991	147.652	89.2124	127.5	84.9975	146.291	84.1345	146.76	87.9137	146.27	84.7952	148.97	82.8778	127.5	76.9913	146.626	78.7142
	128.5	92.5798	148.652	88.6403	128.5	85.2383	147.291	83.952	147.76	87.7234	147.27	86.0405	149.97	81.3985	128.5	77.2747	147.626	78.7137
	129.5	92.7581	149.652	89.1726	129.5	84.7659	148.291	83.7281	148.76	86.7205	148.27	85.9789	150.97	81.4857	129.5	76.6492	148.626	78.4262
	130.5	91.8308	150.652	89.105	152.471	85.0655	149.291	84.1927	149.76	86.3327	149.27	85.4528	151.97	81.0572	130.5	75.8584	149.626	79.0152
	131.5	92.5207	151.652	89.8828	153.471	85.812	150.291	84.0898	150.76	87.8129	150.27	86.474	152.97	80.8289	131.5	76.5715	150.626	78.4849
	132.5	92.8949	152.652	88.7885	154.471	85.4161	151.291	84.1135	151.76	87.4411	151.27	86.759	153.97	81.8376	132.5	76.7528	151.626	78.0533
	133.5	91.784	153.652	88.8316	155.471	86.0343	152.291	84.238	152.76	87.0044	152.27	86.7924	154.97	81.5618	133.5	76.7379	152.626	78.7033
	134.5	91.7213	154.652	89.2313	156.471	86.3557	153.291	84.23	153.76	87.1483	153.27	85.6097	155.97	81.643	134.5	76.2521	153.626	78.7309
	135.5	93.2931	155.652	89.7622	157.471	85.875	154.291	84.891	154.76	87.2545	154.27	86.0853	156.97	80.7039	135.5	76.9334	154.626	79.5942
	136.5	92.2858	156.652	89.4128	158.471	86.1726	155.291	83.8413	155.76	87.7249	155.27	86.4036	157.97	81.3429	136.5	77.0828	155.626	78.4055
	137.5	92.5864	157.652	90.5538	159.471	86.0791	156.291	84.5555	156.76	87.1137	156.27	86.4517	158.97	81.1144	137.5	76.7903	156.626	77.7217
	138.5	92.3009	158.652	89.9668	160.471	86.1937	157.291	84.6579	157.76	86.1607	157.27	86.5479	159.97	81.6962	138.5	76.9174	157.626	78.1499
	139.5	92.4524	159.652	89.5798	161.471	85.9586	158.291	85.0809	158.76	87.6703	158.27	86.4562	160.97	81.2422	139.5	76.9493	158.626	78.3208
	140.5	92.8258	160.652	90.6284	162.471	87.4764	159.291	84.0238	159.76	86.5677	159.27	86.6586	161.97	82.734	140.5	76.7965	159.626	78.1659
	141.5	92.6181	161.652	90.6581	163.471	86.754	160.291	84.616	160.76	87.6367	160.27	87.1536	162.97	80.9847	141.5	77.4593	160.626	79.2656
	142.5	92.5269	162.652	90.123	164.471	86.9666	161.291	84.8562	161.76	86.7863	161.27	86.1041	163.97	81.3866	142.5	76.8728	161.626	77.9975
	143.5	92.1538	163.652	90.1802	165.471	86.157	162.291	84.0642	162.76	87.506	162.27	86.3933	164.97	80.931	143.5	76.4664	162.626	79.4327
	144.5	92.743	164.652	90.4541	166.471	87.8575	163.291	83.8081	163.76	86.8762	163.27	86.7839	165.97	81.3511	144.5	76.3501	163.626	79.4201
	145.5	92.7596	165.652	90.514	167.471	86.3658	164.291	84.0009	164.76	87.0383	164.27	86.5479	166.97	81.9262	145.5	75.7197	164.626	78.7596
	146.5	92.6772	166.652	90.538	168.471	87.3878	165.291	85.0327	165.76	86.5707	165.27	86.3372	167.97	82.2654	146.5	76.8941	165.626	78.7675
	147.5	92.8008	167.652	90.4924	169.471	86.4538	166.291	84.6792	166.76	87.1337	166.27	86.1847	168.97	81.7549	147.5	77.5038	166.626	78.8103
	148.5	92.7325	168.652	90.3954	170.471	87.5156	167.291	85.2592	167.76	88.3475	167.27	87.2403	169.97	83.0695	148.5	77.273	167.626	79.3778
	149.5	92.2552	169.652	90.3091	171.471	86.9897	168.291	85.3237	168.76	87.3904	168.27	87.4312	170.97	81.523	149.5	76.9081	168.626	79.0145
	150.5	93.4835	170.652	90.5305	172.471	87.2019	169.291	85.2614	169.76	87.6464	169.27	87.0856	171.97	82.2285	150.5	76.0957	169.626	78.9785
	151.5	92.7515	171.652	90.3293	173.471	86.1032	170.291	85.4592	170.76	87.6086	170.27	86.5393	172.97	81.8202	151.5	76.0143	170.626	78.0753
	152.5	93.384	172.652	90.8495	174.471	87.9901	171.291	85.4899	171.76	87.4106	171.27	87.1895	173.97	82.1254	152.5	76.4597	171.626	79.0662
	153.5	91.5876	173.652	90.0036	175.471	86.9516	172.291	84.6513	172.76	87.5815	172.27	87.2686	174.97	82.1108	153.5	76.2627	172.626	77.718
	154.5	92.9286	174.652	90.1941	176.471	87.3845	173.291	84.9903	173.76	87.4767	173.27	87.7701	175.97	82.0468	154.5	76.3117	173.626	78.2129
	155.5	92.1364	175.652	90.8933	177.471	87.5355	174.291	85.7328	174.76	87.6538	174.27	87.131	176.97	81.3427	155.5	77.2647	174.626	78.7585
	156.5	92.6761	176.652	91.8571	178.471	87.9869	175.291	85.0013	175.76	87.9748	175.27	87.3912	177.97	82.3009	156.5	76.7709	175.626	79.071
	157.5	92.792	177.652	91.3027	179.471	87.6808	176.291	85.2375	176.76	88.8122	176.27	87.6601	178.97	82.2564	157.5	77.5862	176.626	78.5404
	158.5	93.0554	178.652	91.209	180.471	87.8964	177.291	85.1659	177.76	89.4359	177.27	87.8913	179.97	82.3915	158.5	76.5291	177.626	78.9608
	159.5	92.9239	179.652	91.1932	181.471	87.8168	178.291	85.7466	178.76	88.0711	178.27	86.8472	180.97	81.0591	159.5	77.1428	178.626	78.2482
	160.5	93.0396	180.652	91.4849	182.471	88.2148	179.291	86.5956	179.76	88.4594	179.27	87.8458	181.97	81.4577	160.5	77.1786	179.626	78.8039
	161.5	92.5325	181.652	89.9139	183.471	87.8924	180.291	84.7236	180.76	87.9054	180.27	87.5294	182.97	81.8732	161.5	77.0201	180.626	78.5787
	162.5	92.5834	182.652	90.729	184.471	87.5033	181.291	86.7312	181.76	88.1685	181.27	87.4621	183.97	81.6161	162.5	76.2019	181.626	79.5076
	163.5	91.8404	183.652	91.5783	185.471	87.4503	182.291	84.1442	182.76	87.3331	182.27	88.3323	184.97	82.0346	163.5	77.4997	182.626	78.4804
	164.5	92.9203	184.652	91.3997	186.471	88.1497	183.291	85.746	183.76	87.962	183.27	87.413	185.97	82.3343	164.5	77.3109	183.626	79.549
	165.5	92.4785	185.652	91.093	187.471	86.4855	184.291	85.7432	184.76	89.0633	184.27	87.7418	186.97	81.6817	165.5	76.9189	184.626	77.9745
	166.5	92.4893	186.652	91.0321	188.471	88.3803	185.291	86.0063	185.76	87.4139	185.27	87.7998	187.97	81.3229	166.5	76.5102	185.626	78.8696
	189.481	92.9929	187.652	91.5625	189.471	88.1231	186.291	86.1033	186.76	87.9082	186.27	88.0235	188.97	81.9366	167.5	77.6825	186.626	78.0963
	190.481	92.9659	188.652	92.0213	190.471	87.5347	187.291	85.9375	187.76	88.1415	187.27	87.5545	189.97	82.2876	168.5	76.2071	187.626	79.0415
	191.481	92.4742	189.652	91.5822	191.471	87.8299	188.291	87.0178	188.76	87.9151	188.27	88.2324	190.97	82.047	169.5	76.839	188.626	79.3961
	192.481	93.6214	190.652	91.6497	192.471	87.9088	189.291	86.326	189.76	88.1486	189.27	88.0187	191.97	82.4719	170.5	77.3474	189.626	78.1967
	193.481	94.4518	191.652	91.7408	193.471	87.818	190.291	85.8719	190.76	88.1579	190.27	87.6496	192.97	82.213	171.5	75.8564	190.626	78.7008
	194.481	93.7719	192.652	92.5783	194.471	87.9594	191.291	86.0164	191.76	88.2958	191.27	87.932	193.97	82.1127	172.5	76.6814	191.626	78.6253
	195.481	94.2632	193.652	92.123	195.471	88.1859	192.291	85.8631	192.76	87.8819	192.27	87.6128	194.97	82.6185	173.5	76.7632	192.626	78.5035
	196.481	94.5337	194.652	92.1361	196.471	87.2984	193.291	85.7505	193.76	88.3681	193.27	87.2967	195.97	81.3236	174.5	77.5206	193.626	79.0747
	197.481	93.8525	195.652	91.5434	197.471	88.0543	194.291	86.5176	194.76	88.3236	194.27	87.8993	196.97	82.2152	175.5	76.7503	194.626	77.9671
	198.481	93.3304	196.652	92.4837	198.471	88.2999	195.291	84.9132	195.76	86.6738	195.27	87.3237	197.97	82.8643	176.5	77.435	195.626	78.5073
	199.481	94.0384	197.652	91.1793	199.471	88.8244	196.291	86.2262	196.76	88.2248	196.27	87.3879	198.97	82.971	177.5	76.4943	196.626	78.083
	200.481	93.8538	198.652	93.1294	200.471	87.6164	197.291	86.1754	197.76	88.5686	197.27	88.063	199.97	82.7344	178.5	76.5824	197.626	78.4456
	201.481	95.2889	199.652	92.9487	201.471	87.8129	198.291	86.8892	198.76	88.3932	198.27	87.9693	200.97	82.1761	179.5	77.2086	198.626	78.3532
	202.481	93.864	200.652	93.3984	202.471	88.9257	199.291	86.4321	199.76	87.9266	199.27	88.3774	201.97	82.6049	180.5	77.4179	199.626	77.8064
	203.481	94.5379	201.652	92.7702	203.471	88.8305	200.291	86.0295	200.76	88.841	200.27	87.083	202.97	82.3565	181.5	77.6218	200.626	78.7839
	204.481	93.9359	202.652	91.8913	204.471	86.8653	201.291	86.3968	201.76	87.6336	201.27	88.3715	203.97	82.2836	182.5	77.5673	201.626	78.5653
	205.481	94.1111	203.652	91.5487	205.471	89.0487	202.291	87.1522	202.76	87.9899	202.27	88.153	204.97	82.3716	183.5	76.8975	202.626	78.2927
	206.481	93.9811	204.652	92.1779	206.471	88.4081	203.291	87.4753	203.76	87.9247	203.27	88.0638	205.97	82.462	184.5	76.9237	203.626	78.4654
	207.481	94.1929	205.652	92.719	207.471	88.6806	204.291	86.2858	204.76	88.0495	204.27	88.8583	206.97	82.7354	185.5	78.2563	204.626	79.5331
	208.481	93.6977	206.652	93.1893	208.471	88.9586	205.291	86.4279	205.76	88.8405	205.27	87.8274	207.97	82.448	186.5	76.4987	205.626	78.0013
	209.481	94.1524	207.652	92.049	209.471	89.776	206.291	85.9006	206.76	88.985	206.27	88.7501	208.97	82.207	187.5	76.3034	206.626	78.3892
	210.481	94.2275	208.652	92.5107	210.471	89.287	207.291	87.4912	207.76	89.0575	207.27	88.3198	209.97	83.0004	188.5	77.1976	207.626	78.6762
	211.481	94.8026	209.652	92.4246	211.471	88.6571	208.291	87.5202	208.76	88.8796	208.27	87.7355	210.97	82.4371	189.5	76.9779	208.626	77.9051
	212.481	95.2093	210.652	93.0267	212.471	89.2153	209.291	86.0487	209.76	88.5491	209.27	88.4212	211.97	82.6572	190.5	77.8489	209.626	78.5235
	213.481	94.5621	211.652	91.7558	213.471	88.3883	210.291	86.1289	210.76	88.2828	210.27	88.0234	212.97	83.1284	191.5	76.833	210.626	79.5932
	214.481	94.4636	212.652	92.5093	214.471	89.3311	211.291	86.9477	211.76	88.6095	211.27	88.6116	213.97	82.2413	192.5	76.0905	211.626	78.9128
	215.481	95.1961	213.652	93.6341	215.471	87.8375	212.291	85.8865	212.76	88.604	212.27	88.319	214.97	82.3578	193.5	76.8505	212.626	78.7717
	216.481	94.8331	214.652	93.1265	216.471	88.7387	213.291	85.6484	213.76	89.4787	213.27	89.4275	215.97	83.2356	194.5	76.7184	213.626	78.2674
	217.481	94.7675	215.652	93.3577	217.471	89.1273	214.291	86.306	214.76	89.2638	214.27	89.2579	216.97	82.386	195.5	77.0105	214.626	79.0441
	218.481	95.072	216.652	94.0269	218.471	88.4647	215.291	87.0175	215.76	89.5166	215.27	89.2978	217.97	82.5141	196.5	76.9497	215.626	77.7075
	219.481	93.9267	217.652	94.1347	219.471	90.086	216.291	86.9201	216.76	88.4729	216.27	88.6835	218.97	83.0244	197.5	77.4967	216.626	79.0543
	220.481	95.7625	218.652	93.1882	220.471	88.437	217.291	87.5376	217.76	88.8871	217.27	88.7163	219.97	82.5044	198.5	76.4689	217.626	78.1453
	221.481	94.6894	219.652	93.0053	221.471	89.6003	218.291	87.5546	218.76	89.9163	218.27	87.7266	220.97	82.1791	199.5	77.1709	218.626	78.0992
	222.481	95.4887	220.652	93.6166	222.471	88.4741	219.291	86.4045	219.76	88.8291	219.27	88.4849	221.97	81.6454	200.5	77.4947	219.626	79.0404
	223.481	95.7635	221.652	93.5469	223.471	89.0825	220.291	87.0308	220.76	89.6147	220.27	88.6457	222.97	82.0457	201.5	77.5869	220.626	78.4201
	224.481	96.1553	222.652	93.8633	224.471	89.6577	221.291	87.3746	221.76	89.4297	221.27	88.384	223.97	83.0605	202.5	77.1959	221.626	77.6004
	225.481	96.3819	223.652	93.4181	225.471	88.6862	222.291	87.253	222.76	88.6375	222.27	88.7167	224.97	82.9521	203.5	76.9999	222.626	78.6031
	226.481	95.3197	224.652	93.2148	226.471	89.7807	223.291	89.1002	223.76	89.4254	223.27	89.1425	225.97	82.1698	204.5	76.2541	223.626	79.2468
	227.481	95.2067	225.652	94.347	227.471	90.4279	224.291	87.5539	224.76	89.9518	224.27	88.3816	226.97	82.3438	205.5	77.1811	224.626	78.1257
	228.481	94.3762	226.652	93.4259	228.471	89.6443	225.291	87.5794	225.76	89.5409	225.27	89.491	227.97	82.9556	206.5	76.2951	225.626	79.1117
	229.481	95.6049	227.652	93.9229	229.471	89.4429	226.291	87.7607	226.76	88.851	226.27	89.3165	228.97	83.4098	207.5	76.2132	226.626	78.6855
	230.481	96.0847	228.652	93.9711	230.471	90.6338	227.291	87.3631	227.76	90.3239	227.27	88.7556	229.97	83.0765	208.5	76.86	227.626	78.6786
	231.481	95.3896	229.652	93.2154	231.471	89.8473	228.291	86.7213	228.76	89.3571	228.27	89.7209	230.97	82.1099	209.5	76.764	228.626	78.6052
	232.481	95.0652	230.652	94.0497	232.471	90.3107	229.291	88.4514	229.76	88.9358	229.27	88.3906	231.97	81.9396	210.5	77.619	229.626	78.2154
	233.481	96.189	231.652	93.182	233.471	89.5527	230.291	88.1326	230.76	89.8413	230.27	88.4667	232.97	82.5516	211.5	76.68	230.626	78.7186
	234.481	95.3791	232.652	94.7287	234.471	89.5761	231.291	88.2382	231.76	90.4143	231.27	88.5885	233.97	82.4084	212.5	78.1456	231.626	78.9026
	235.481	95.7512	233.652	93.4472	235.471	89.9305	232.291	87.9359	232.76	89.1971	232.27	89.3827	234.97	82.097	213.5	77.1149	232.626	79.096
	236.481	97.0938	234.652	94.1401	236.471	90.377	233.291	88.6774	233.76	89.674	233.27	89.0794	235.97	82.6389	214.5	76.7808	233.626	78.3656
	237.481	96.4746	235.652	94.2496	237.471	90.619	234.291	88.3712	234.76	89.1424	234.27	88.998	236.97	82.5135	215.5	76.9158	234.626	78.7062
	238.481	96.2002	236.652	94.4481	238.471	89.6717	235.291	88.3007	235.76	89.4288	235.27	90.2431	237.97	81.4623	216.5	76.6713	235.626	78.2743
	239.481	95.6758	237.652	94.5255	239.471	90.501	236.291	88.467	236.76	88.7372	236.27	88.6809	238.97	82.1921	217.5	74.9862	236.626	78.579
	240.481	96.8595	238.652	94.8229	240.471	90.4895	237.291	87.9815	237.76	89.4007	237.27	88.6098	239.97	81.2125	218.5	77.6505	237.626	78.4225
	241.481	95.6548	239.652	94.1643	241.471	89.9051	238.291	87.7195	238.76	89.8235	238.27	89.4099	240.97	82.2339	219.5	77.1337	238.626	78.6829
	242.481	96.9773	240.652	94.4875	242.471	89.3587	239.291	88.1651	239.76	89.668	239.27	89.0534	241.97	82.7179	220.5	75.9698	239.626	78.7046
	243.481	97.7134	241.652	94.4331	243.471	89.7966	240.291	87.1515	240.76	89.8575	240.27	89.0024	242.97	81.754	221.5	76.5592	240.626	78.5076
	244.481	96.9166	242.652	93.9416	244.471	90.8493	241.291	88.521	241.76	89.8008	241.27	89.3099	243.97	81.0908	222.5	76.4404	241.626	77.8166
	245.481	96.0994	243.652	94.642	245.471	89.5978	242.291	88.197	242.76	90.173	242.27	89.0551	244.97	82.3111	223.5	76.6488	242.626	77.7602
	246.481	97.1523	244.652	94.3655	246.471	90.6805	243.291	87.7505	243.76	90.5586	243.27	88.5292	245.97	81.9127	224.5	77.102	243.626	78.9591
	247.481	96.8479	245.652	94.4513	247.471	90.3198	244.291	89.0634	244.76	89.5559	244.27	89.5084	246.97	81.135	225.5	75.9186	244.626	77.7656
	248.481	95.9812	246.652	95.2927	248.471	90.3884	245.291	88.8351	245.76	89.8344	245.27	89.3995	247.97	81.8532	226.5	76.9155	245.626	79.2557
	249.481	96.9077	247.652	94.808	249.471	90.754	246.291	88.8717	246.76	89.6251	246.27	89.3559	248.97	82.0858	227.5	76.8648	246.626	77.6959
	250.481	97.0283	248.652	94.2233	250.471	92.1118	247.291	88.2915	247.76	89.8526	247.27	88.6893	249.97	82.0873	228.5	76.8736	247.626	78.5125
	251.481	96.3946	249.652	95.8151	251.471	91.6461	248.291	89.1767	248.76	89.996	248.27	89.4338	250.97	80.9171	229.5	76.7553	248.626	78.1948
	252.481	97.8338	250.652	95.2017	252.471	90.1709	249.291	87.7312	249.76	89.9547	249.27	88.46	251.97	81.2618	230.5	76.2792	249.626	78.5163
	253.481	97.4294	251.652	95.0576	253.471	90.7109	250.291	89.1855	250.76	90.0923	250.27	89.3441	252.97	81.2389	231.5	76.4126	250.626	78.2161
	254.481	97.1435	252.652	95.4294	254.471	90.6421	251.291	88.4007	251.76	90.5819	251.27	89.7323	253.97	80.8445	232.5	76.7855	251.626	78.1946
	255.481	97.1365	253.652	95.8267	255.471	91.1258	252.291	89.0371	252.76	91.038	252.27	89.5959	254.97	81.6375	233.5	76.693	252.626	78.4728
	256.481	97.0932	254.652	95.3197	256.471	90.4601	253.291	88.9895	253.76	90.58	253.27	89.588	255.97	81.5761	234.5	76.5549	253.626	78.3948
	257.481	97.8387	255.652	94.1828	257.471	91.4037	254.291	89.6035	254.76	90.9108	254.27	89.7321	256.97	81.558	235.5	77.3538	254.626	78.3431
	258.481	98.0468	256.652	95.657	258.471	91.6996	255.291	89.2812	255.76	91.4407	255.27	89.2827	257.97	82.2497	236.5	76.7187	255.626	78.8851
	259.481	97.1758	257.652	95.63	259.471	90.5798	256.291	88.8413	256.76	90.9579	256.27	89.5971	258.97	81.0293	237.5	76.7536	256.626	78.2687
	260.481	98.7055	258.652	96.1669	260.471	91.85	257.291	89.104	257.76	90.6831	257.27	89.989	259.97	80.9374	238.5	77.4178	257.626	78.4184
	261.481	96.6858	259.652	96.0241	261.471	92.0671	258.291	88.6001	258.76	89.9116	258.27	90.329	260.97	80.8475	239.5	76.5399	258.626	78.8124
	262.481	98.422	260.652	95.7947	262.471	91.0636	259.291	89.2553	259.76	90.4274	259.27	90.5794	261.97	81.6568	240.5	76.0816	259.626	78.2269
	263.481	97.7507	261.652	94.8122	263.471	91.4123	260.291	89.2388	260.76	90.4063	260.27	89.6725	262.97	80.6281	241.5	77.0169	260.626	78.2743
	264.481	98.4528	262.652	95.1803	264.471	92.3657	261.291	88.4461	261.76	91.2727	261.27	90.097	263.97	81.1997	242.5	77.2433	261.626	78.8333
	265.481	97.9519	263.652	95.9661	265.471	91.1488	262.291	90.0653	262.76	91.0656	262.27	89.4446	264.97	82.1232	243.5	76.5894	262.626	78.7474
	266.481	97.7033	264.652	95.2106	266.471	92.0988	263.291	89.2946	263.76	89.8751	263.27	90.342	265.97	81.2157	244.5	76.53	263.626	78.576
	267.481	98.6731	265.652	95.6919	267.471	92.086	264.291	89.68	264.76	91.0474	264.27	90.7303	266.97	81.7136	245.5	76.7557	264.626	79.2197
	268.481	98.4766	266.652	96.3968	268.471	91.8738	265.291	89.7474	265.76	90.6215	265.27	89.8098	267.97	81.2961	246.5	75.8851	265.626	78.7716
	269.481	98.3555	267.652	95.8896	269.471	91.4433	266.291	89.6786	266.76	89.9539	266.27	89.906	268.97	82.0792	247.5	76.0995	266.626	78.3337
	270.481	98.6839	268.652	95.3798	270.471	91.0068	267.291	89.1237	267.76	90.4202	267.27	90.3725	269.97	81.7084	248.5	76.8469	267.626	78.492
	271.481	98.8821	269.652	95.733	271.471	92.5854	268.291	89.824	268.76	90.0451	268.27	89.4306	270.97	81.206	249.5	77.2815	268.626	78.5059
	272.481	99.4839	270.652	96.4155	272.471	92.7757	269.291	89.7256	269.76	90.8844	269.27	89.1603	271.97	81.6063	250.5	77.0462	269.626	79.1759
	273.481	99.5737	271.652	96.3235	273.471	90.9755	270.291	88.9084	270.76	89.7286	270.27	89.4746	272.97	81.337	251.5	76.1253	270.626	78.8647
	274.481	98.9311	272.652	96.1676	274.471	92.5788	271.291	89.1864	271.76	90.4462	271.27	90.1098	273.97	81.8955	252.5	77.1879	271.626	79.0317
	275.481	98.7452	273.652	95.281	275.471	92.0582	272.291	89.2738	272.76	90.8539	272.27	89.9055	274.97	80.3361	253.5	76.6108	272.626	78.6399
	276.481	99.4061	274.652	96.4155	276.471	92.4383	273.291	89.4197	273.76	90.3	273.27	90.4189	275.97	81.393	254.5	76.4204	273.626	78.553
	277.481	98.3663	275.652	96.8037	277.471	91.8745	274.291	90.1098	274.76	91.5205	274.27	90.0231	276.97	81.5517	255.5	75.9851	274.626	78.8613
	278.481	98.8798	276.652	97.4886	278.471	92.6185	275.291	90.1111	275.76	90.1977	275.27	89.1096	277.97	81.8416	256.5	77.1651	275.626	78.1413
	279.481	99.1556	277.652	96.2855	279.471	93.7559	276.291	90.2491	276.76	90.9016	276.27	89.0441	278.97	81.2613	257.5	76.1209	276.626	79.704
	280.481	98.8498	278.652	96.2177	280.471	92.2104	277.291	89.7866	277.76	90.5837	277.27	90.4935	279.97	81.111	258.5	77.0237	277.626	78.5203
	281.481	99.8137	279.652	97.0832	281.471	92.4062	278.291	89.3313	278.76	91.6519	278.27	90.5065	280.97	81.4632	259.5	77.1292	278.626	79.3213
	282.481	99.5469	280.652	96.5163	282.471	91.9137	279.291	90.376	279.76	91.5044	279.27	90.8972	281.97	81.271	260.5	76.353	279.626	79.6468
	283.481	99.4932	281.652	97.0322	283.471	92.8261	280.291	89.9908	280.76	90.9814	280.27	90.6141	282.97	81.9101	261.5	76.1905	280.626	78.2417
	284.481	99.2129	282.652	97.6264	284.471	92.2367	281.291	89.6443	281.76	91.5894	281.27	90.7899	283.97	81.3276	262.5	76.6898	281.626	78.6365
	285.481	99.3044	283.652	96.9006	285.471	92.7023	282.291	90.6795	282.76	90.6933	282.27	89.9389	284.97	81.5703	263.5	77.1941	282.626	78.4745
	286.481	99.3588	284.652	96.7646	286.471	93.112	283.291	90.3274	283.76	91.8077	283.27	90.252	285.97	81.4744	264.5	77.3082	283.626	78.7856
	287.481	99.2471	285.652	97.3153	287.471	92.3242	284.291	89.4857	284.76	90.7275	284.27	91.8569	286.97	82.3708	265.5	77.1244	284.626	78.1978
	288.481	98.6541	286.652	97.3296	288.471	91.9076	285.291	90.2356	285.76	91.2414	285.27	90.5075	287.97	81.1774	266.5	76.8804	285.626	79.311
	289.481	99.4368	287.652	97.5483	289.471	92.6689	286.291	89.1771	286.76	92.1937	286.27	90.2267	288.97	81.9418	267.5	76.6337	286.626	78.7578
	290.481	99.7368	288.652	96.5361	290.471	93.2401	287.291	90.1048	287.76	90.9478	287.27	90.6561	289.97	81.7232	268.5	76.4897	287.626	78.9707
	291.481	100.115	289.652	98.687	291.471	92.5324	288.291	90.6779	288.76	91.0557	288.27	90.1996	290.97	81.5111	269.5	76.7723	288.626	78.3841
	292.481	100.081	290.652	98.3795	292.471	94.114	289.291	90.8973	289.76	91.2828	289.27	90.3711	291.97	81.452	270.5	76.4254	289.626	78.9833
	293.481	100.321	291.652	98.0887	293.471	93.103	290.291	89.7207	290.76	91.1916	290.27	90.7113	292.97	81.4447	286.74	77.6421	290.626	77.9876
	294.481	99.9881	292.652	97.8251	294.471	92.7139	291.291	90.0876	291.76	91.2779	291.27	90.3767	293.97	81.4013	287.74	77.8197	291.626	78.3224
	295.481	99.8349	293.652	98.5602	295.471	92.5031	292.291	90.9168	292.76	91.4746	292.27	90.3896	294.97	81.5046	288.74	78.5392	292.626	79.2583
	296.481	100.21	294.652	99.0652	296.471	93.7407	293.291	90.339	293.76	91.8707	293.27	90.2311	295.97	81.5517	289.74	79.3234	293.626	79.6508
	297.481	99.5889	295.652	97.9383	297.471	94.0611	294.291	90.4372	294.76	91.6263	294.27	89.8809	296.97	81.7048	290.74	79.1334	294.626	79.4776
	298.481	99.295	296.652	97.1686	298.471	93.3327	295.291	90.2749	295.76	91.7952	295.27	91.055	297.97	81.4052	291.74	78.5626	295.626	79.3673
	299.481	100.762	297.652	97.7227	299.471	93.0708	296.291	90.2353	296.76	92.0311	296.27	90.3995	298.97	81.0373	292.74	79.3957	296.626	79.0185
	300.481	99.9809	298.652	97.4072	300.471	93.2645	297.291	90.81	297.76	91.2041	297.27	90.475	299.97	81.9132	293.74	78.3384	297.626	79.4115
	301.481	99.7275	299.652	98.233	301.471	92.3474	298.291	91.1293	298.76	92.2434	298.27	90.9884	300.97	81.453	294.74	80.1921	298.626	79.2966
	302.481	99.8468	300.652	98.5293	302.471	93.5339	299.291	90.947	299.76	90.9501	299.27	90.2277	301.97	81.8486	295.74	78.7116	299.626	78.7099
	303.481	100.739	301.652	98.0081	303.471	92.8125	300.291	90.2338	300.76	91.2489	300.27	91.0599	302.97	81.8717	296.74	78.6562	300.626	78.7704
	304.481	100.72	302.652	98.4923	304.471	94.7367	301.291	90.678	301.76	91.959	301.27	91.1313	303.97	82.4211	297.74	79.293	301.626	77.9504
	305.481	99.485	303.652	99.1965	305.471	93.5479	302.291	90.2491	302.76	91.6684	302.27	90.6756	304.97	81.3742	298.74	78.1602	302.626	79.3483
	306.481	99.9614	304.652	98.7602	306.471	93.091	303.291	90.3853	303.76	92.2783	303.27	91.1576	305.97	81.2596	299.74	79.5309	303.626	78.5874
	307.481	100.395	305.652	97.8334	307.471	94.694	304.291	91.928	304.76	91.7755	304.27	90.3277	306.97	82.1528	300.74	79.1955	304.626	78.9507
	308.481	99.9611	306.652	98.0751	308.471	92.8734	305.291	91.1734	305.76	92.5569	305.27	90.6995	307.97	81.5245	301.74	77.7336	305.626	78.1173
	309.481	100.292	307.652	98.2495	309.471	93.7632	306.291	91.3762	306.76	92.264	306.27	91.0813	308.97	81.3041	302.74	79.2704	306.626	78.362
	310.481	100.342	308.652	98.6647	310.471	93.5523	307.291	90.9464	307.76	91.5191	307.27	90.751	309.97	82.0126	303.74	79.0493	307.626	78.6642
	311.481	101.291	309.652	99.4364	311.471	93.9159	308.291	91.8787	308.76	92.2952	308.27	90.3268	310.97	81.9761	304.74	78.6874	308.626	79.0931
	312.481	100.9	310.652	99.1058	312.471	93.743	309.291	91.4664	309.76	92.3963	309.27	91.6088	311.97	82.1683	305.74	78.7772	309.626	79.4998
	313.481	101.389	311.652	98.6501	313.471	93.4943	310.291	90.8392	310.76	92.1139	310.27	91.2747	312.97	81.0113	306.74	78.905	310.626	79.0251
	314.481	101.281	312.652	98.5218	314.471	93.7624	311.291	90.8994	311.76	92.4592	311.27	89.7113	313.97	81.5682	307.74	77.8466	311.626	78.9015
	315.481	99.8536	313.652	99.2408	315.471	93.2977	312.291	91.4443	312.76	91.4887	312.27	91.0217	314.97	81.9548	308.74	79.0936	312.626	78.8311
	316.481	101.482	314.652	99.7604	316.471	93.8211	313.291	90.7879	313.76	91.3413	313.27	91.1619	315.97	81.5727	309.74	79.1748	313.626	78.5353
	317.481	101.012	315.652	98.9367	317.471	93.5842	314.291	92.1942	314.76	92.0236	314.27	90.676	316.97	82.3727	310.74	77.9995	314.626	78.926
	318.481	100.817	316.652	99.1476	318.471	93.8938	315.291	92.2082	315.76	92.1247	315.27	91.087	317.97	82.0764	311.74	78.8261	315.626	78.3278
	319.481	101.771	317.652	99.2004	319.471	94.3127	316.291	91.0914	316.76	93.6828	316.27	90.9111	318.97	81.277	312.74	78.94	316.626	78.9856
	320.481	101.854	318.652	98.7408	320.471	93.7481	317.291	91.3587	317.76	92.7004	317.27	90.932	319.97	82.1003	313.74	79.3833	317.626	78.3601
	321.481	102.56	319.652	99.113	321.471	93.7505	318.291	91.5107	318.76	92.3578	318.27	91.4778	320.97	81.8461	314.74	77.8019	318.626	78.8772
	322.481	100.726	320.652	99.0203	322.471	94.1925	319.291	90.8497	319.76	91.8881	319.27	91.3319	321.97	81.5617	315.74	78.4523	319.626	78.8127
	323.481	102.078	321.652	100.532	323.471	93.2824	320.291	91.7222	320.76	91.9176	320.27	91.31	322.97	82.1064	316.74	78.4623	320.626	78.8493
	324.481	102.864	322.652	99.0471	324.471	94.6035	321.291	91.937	321.76	92.1299	321.27	91.1737	323.97	82.3958	317.74	78.8837	321.626	78.53
	325.481	100.803	323.652	99.6495	325.471	94.0081	322.291	91.8608	322.76	91.8234	322.27	90.8556	324.97	80.6739	318.74	77.8181	322.626	78.1518
	326.481	101.734	324.652	99.9888	326.471	94.6732	323.291	91.3416	323.76	92.5765	323.27	91.5037	325.97	81.1796	319.74	78.5474	323.626	78.8055
	327.481	101.334	325.652	100.696	327.471	94.2658	324.291	92.1698	324.76	92.405	324.27	91.4528	326.97	81.2965	320.74	79.1894	324.626	79.4421
	328.481	100.838	326.652	99.8828	328.471	94.4567	325.291	92.1261	325.76	92.086	325.27	90.7738	327.97	82.4641	321.74	79.0731	325.626	78.9474
	329.481	102.106	327.652	100.009	329.471	95.9387	326.291	91.48	326.76	92.7211	326.27	91.8311	328.97	81.0374	322.74	80.0461	326.626	78.4436
	330.481	102.268	328.652	99.3531	330.471	94.8517	327.291	91.6718	327.76	92.8761	327.27	91.7003	329.97	81.5936	323.74	79.2993	327.626	78.4658
	331.481	101.118	329.652	99.512	331.471	94.4518	328.291	91.6656	328.76	91.2461	328.27	92.6897	330.97	80.8755	324.74	79.8651	328.626	77.994
	332.481	102.463	330.652	99.7762	332.471	94.6057	329.291	91.7659	329.76	91.9366	329.27	91.2643	331.97	81.1117	325.74	80.471	329.626	78.432
	333.481	102.625	331.652	99.9818	333.471	96.3051	330.291	91.8603	330.76	92.4955	330.27	91.5713	332.97	82.4056	326.74	80.576	330.626	78.1908
	334.481	102.611	332.652	100.071	334.471	94.9853	331.291	91.6379	331.76	92.4157	331.27	91.4512	333.97	82.6492	327.74	79.7843	331.626	79.1839
[truncated: 912 more rows]
