# Supplementary figures and images for: Structures of RecBCD in complex with phage-encoded inhibitor proteins reveal distinctive strategies for evasion of a bacterial immunity hub
Source: eLife journal article supplement (doi:10.7554/elife.83409), 2022-12-19

From Figure 1A

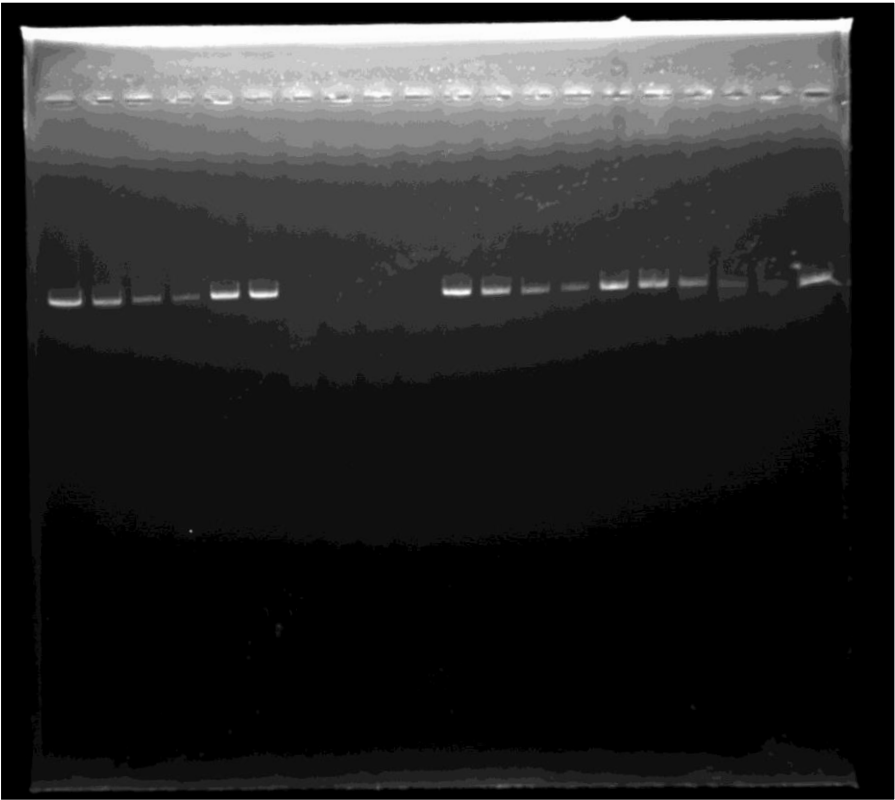

Linearised plasmid  
DNA substrate

From Figure 1E

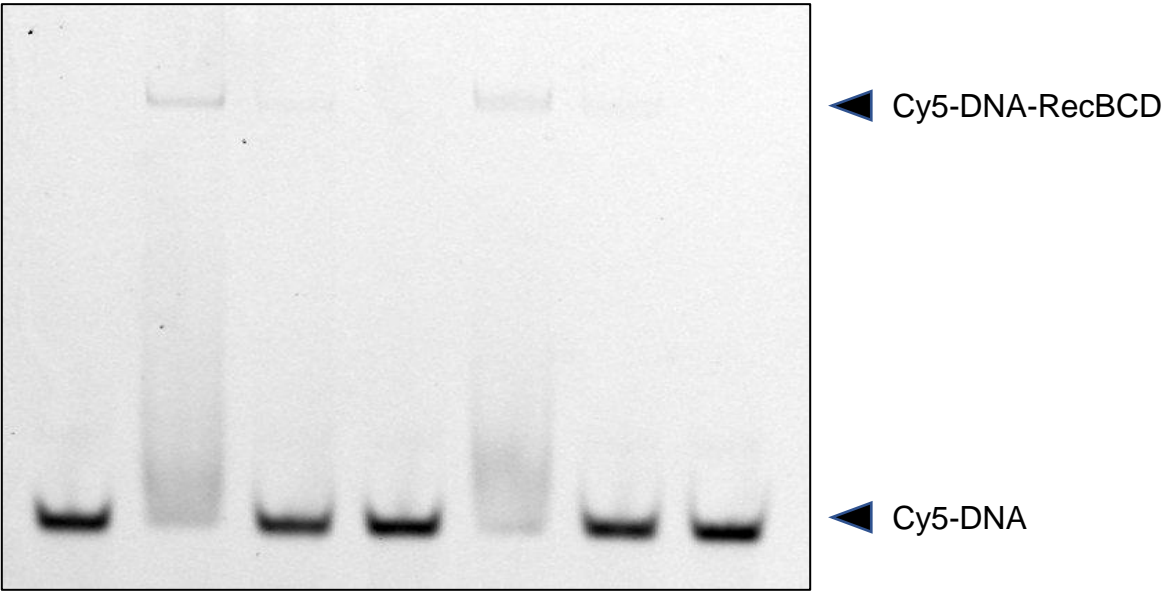

From Figure 1F

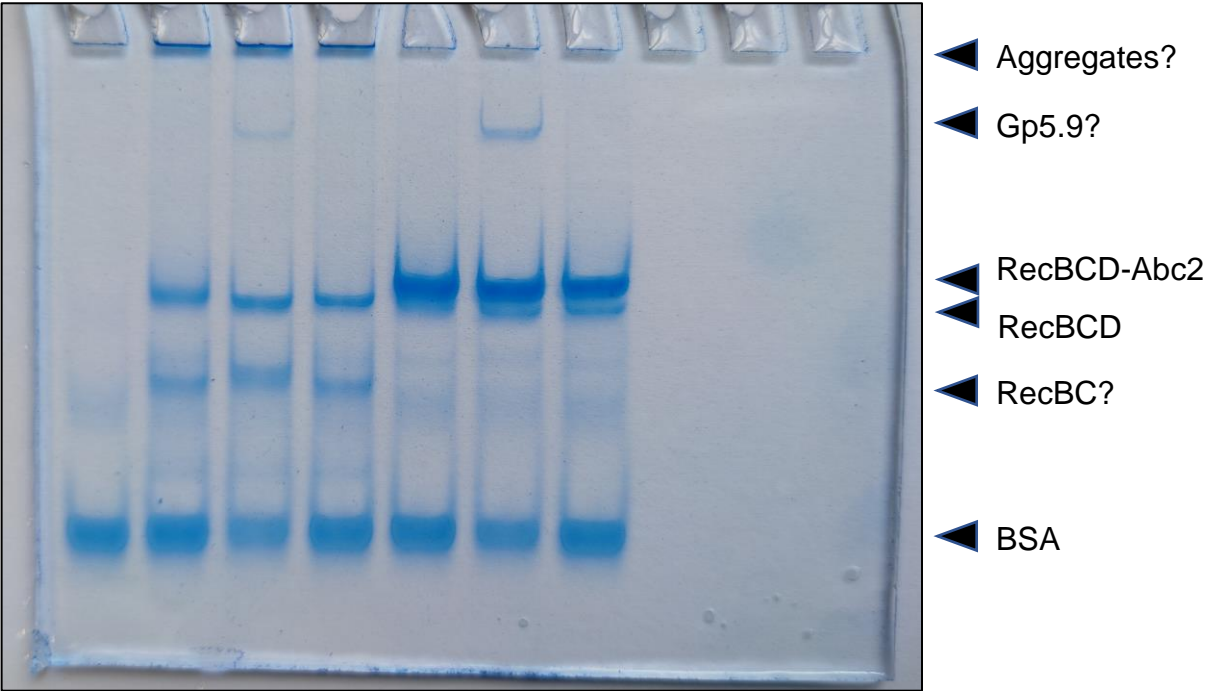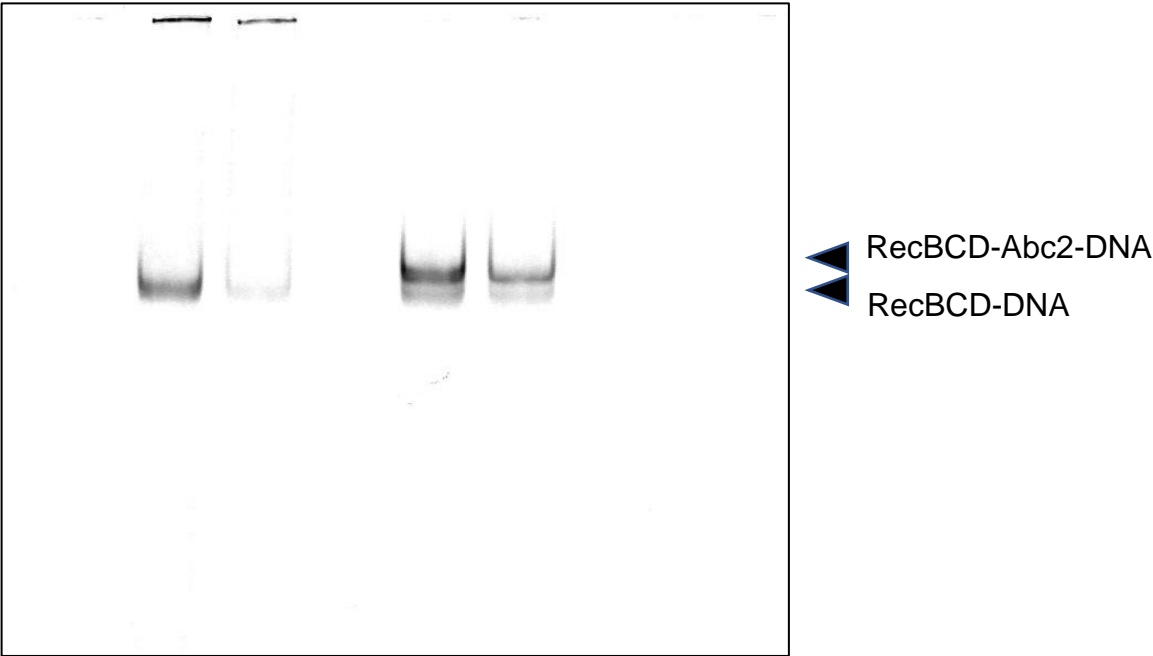

Supplement: supp [file elife-83409-supp-v1.zip]
